# Supplementary material for: The small CRL4CSA ubiquitin ligase component DDA1 regulates transcription-coupled repair dynamics
Source: Nat Commun. 2024 Jul 29;15:6374. doi: 10.1038/s41467-024-50584-7 (PMC11286758; doi:10.1038/s41467-024-50584-7)
Supplement: Supplementary file 4 — Supplementary Data 1 [file 41467_2024_50584_MOESM4_ESM.xlsx]

## Sheet: Sheet1
Gene names	Protein names	Ratio H/L normalized WT (H) vs CSAmClover (L)	Ratio H/L normalized CSAmClover (H) vs WT (L)	Ratio H/L normalized WT +UV (H) vs CSAmClover +UV (L)	Ratio H/L normalized CSAmClover +UV (H) vs WT +UV (L)	Protein IDs	Majority protein IDs	Peptide counts (all)	Peptide counts (razor+unique)	Peptide counts (unique)	Fasta headers	Number of proteins	Peptides	Razor + unique peptides	Unique peptides	Peptides WT (H) vs CSAKI (L)	Peptides WT (L) vs CSAKI (H)	Peptides WT +UV (H) vs CSAKI +UV (L)	Peptides WT +UV (L) vs CSAKI +UV H)	Razor + unique peptides WT (H) vs CSAKI (L)	Razor + unique peptides WT (L) vs CSAKI (H)	Razor + unique peptides WT +UV (H) vs CSAKI +UV (L)	Razor + unique peptides WT +UV (L) vs CSAKI +UV H)	Unique peptides WT (H) vs CSAKI (L)	Unique peptides WT (L) vs CSAKI (H)	Unique peptides WT +UV (H) vs CSAKI +UV (L)	Unique peptides WT +UV (L) vs CSAKI +UV H)	Sequence coverage [%]	Unique + razor sequence coverage [%]	Unique sequence coverage [%]	Mol. weight [kDa]	Sequence length	Sequence lengths	Q-value	Score	Ratio H/L	Ratio H/L normalized	Ratio H/L variability [%]	Ratio H/L count	Ratio H/L iso-count	Ratio H/L type	Ratio H/L WT (H) vs CSAKI (L)	Ratio H/L WT (L) vs CSAKI (H)	Ratio H/L WT +UV (H) vs CSAKI +UV (L)	Ratio H/L WT +UV (L) vs CSAKI +UV H)	Ratio H/L normalized WT (H) vs CSAKI (L)	Ratio H/L normalized WT (L) vs CSAKI (H)	Ratio H/L normalized WT +UV (H) vs CSAKI +UV (L)	Ratio H/L normalized WT +UV (L) vs CSAKI +UV H)
ANKRD18B	Ankyrin repeat domain-containing protein 18B	0.13333	NaN	NaN	NaN	A2A2Z9	A2A2Z9	1	1	1	sp|A2A2Z9|AN18B_HUMAN Ankyrin repeat domain-containing protein 18B OS=Homo sapiens OX=9606 GN=ANKRD18B PE=1 SV=1	1	1	1	1	1	0	0	0	1	0	0	0	1	0	0	0	1.2	1.2	1.2	118.23	1011	1011	1	-2	0.13757	0.13333	17.678	2	2	Median	0.13757	NaN	NaN	NaN	0.13333	NaN	NaN	NaN
CLIP1	CAP-Gly domain-containing linker protein 1	0.47489	NaN	NaN	NaN	F5H6A0;J3KP58;P30622-2;P30622-1;P30622;A0A3B3ITA2;F5H0N7	F5H6A0;J3KP58;P30622-2;P30622-1;P30622;A0A3B3ITA2;F5H0N7	2;2;2;2;2;1;1	2;2;2;2;2;1;1	2;2;2;2;2;1;1	tr|F5H6A0|F5H6A0_HUMAN Isoform of P30622, CAP-Gly domain-containing linker protein 1 (Fragment) OS=Homo sapiens OX=9606 GN=CLIP1 PE=1 SV=2;tr|J3KP58|J3KP58_HUMAN Isoform of P30622, CAP-Gly domain-containing linker protein 1 OS=Homo sapiens OX=9606 GN=CLIP1	7	2	2	2	1	0	1	0	1	0	1	0	1	0	1	0	3.5	3.5	3.5	89.478	802	802;1316;1392;1427;1438;791;1063	0.0019873	2.2543	0.51609	0.47489	NaN	1	1	Median	0.51609	NaN	NaN	NaN	0.47489	NaN	NaN	NaN
IFITM2;IFITM3;IFITM1	Interferon-induced transmembrane protein 1;Interferon-induced transmembrane protein 2;Interferon-induced transmembrane protein 3	0.52684	NaN	0.90215	NaN	H7BYV1;E9PS44;E9PQN9;P13164;Q01629;Q01628	H7BYV1;E9PS44;E9PQN9;P13164;Q01629;Q01628	1;1;1;1;1;1	1;1;1;1;1;1	1;1;1;1;1;1	tr|H7BYV1|H7BYV1_HUMAN Isoform of Q01629, Interferon-induced transmembrane protein 2 (Fragment) OS=Homo sapiens OX=9606 GN=IFITM2 PE=4 SV=1;tr|E9PS44|E9PS44_HUMAN Isoform of Q01628, Interferon-induced transmembrane protein 3 OS=Homo sapiens OX=9606 GN=IFIT	6	1	1	1	1	0	1	0	1	0	1	0	1	0	1	0	21.6	21.6	21.6	8.0866	74	74;112;112;125;132;133	0.00083822	2.6627	0.50884	0.68941	38.033	2	1	Median	0.53295	NaN	0.48581	NaN	0.52684	NaN	0.90215	NaN
SERPINB12	Serpin B12	0.53114	NaN	NaN	NaN	Q96P63;Q96P63-2	Q96P63;Q96P63-2	3;3	3;3	3;3	sp|Q96P63|SPB12_HUMAN Serpin B12 OS=Homo sapiens OX=9606 GN=SERPINB12 PE=1 SV=1;sp|Q96P63-2|SPB12-2_HUMAN Isoform of Q96P63, Isoform 2 of Serpin B12 OS=Homo sapiens OX=9606 GN=SERPINB12 PE=1 SV=1	2	3	3	3	1	3	2	2	1	3	2	2	1	3	2	2	9.9	9.9	9.9	46.276	405	405;425	0	4.8087	0.57432	0.53114	NaN	1	1	Median	0.57432	NaN	NaN	NaN	0.53114	NaN	NaN	NaN
		0.57589	NaN	NaN	NaN	REV__Q86WZ0	REV__Q86WZ0	1	1	1	sp|Q86WZ0|HEAT4_HUMAN HEAT repeat-containing protein 4 OS=Homo sapiens OX=9606 GN=HEATR4 PE=2 SV=2	1	1	1	1	1	0	0	0	1	0	0	0	1	0	0	0	0	0	0	117.17	1026	1026	0.0063197	1.7325	0.61385	0.57589	NaN	1	0	Median	0.61385	NaN	NaN	NaN	0.57589	NaN	NaN	NaN
PARP2	Poly [ADP-ribose] polymerase 2	0.60381	NaN	0.98949	NaN	H0YH02;G3V167;Q9UGN5-2;Q9UGN5	H0YH02;G3V167;Q9UGN5-2;Q9UGN5	2;2;2;2	2;2;2;2	2;2;2;2	tr|H0YH02|H0YH02_HUMAN Isoform of Q9UGN5, Poly [ADP-ribose] polymerase (Fragment) OS=Homo sapiens OX=9606 GN=PARP2 PE=1 SV=1;tr|G3V167|G3V167_HUMAN Isoform of Q9UGN5, Poly [ADP-ribose] polymerase OS=Homo sapiens OX=9606 GN=PARP2 PE=1 SV=1;sp|Q9UGN5-2|PARP2	4	2	2	2	1	0	2	0	1	0	2	0	1	0	2	0	15.8	15.8	15.8	20.269	177	177;531;570;583	0.00084674	2.8065	0.68413	0.77295	34.927	2	0	Median	0.66746	NaN	0.70123	NaN	0.60381	NaN	0.98949	NaN
EXOC5	Exocyst complex component 5	0.60721	NaN	NaN	NaN	F8W9B8;A0A0A0MSI8;O00471	F8W9B8;A0A0A0MSI8;O00471	2;2;2	2;2;2	2;2;2	tr|F8W9B8|F8W9B8_HUMAN Isoform of O00471, Exocyst complex component 5 OS=Homo sapiens OX=9606 GN=EXOC5 PE=1 SV=1;tr|A0A0A0MSI8|A0A0A0MSI8_HUMAN Isoform of O00471, Exocyst complex component 5 OS=Homo sapiens OX=9606 GN=EXOC5 PE=1 SV=1;sp|O00471|EXOC5_HUMAN	3	2	2	2	2	1	1	0	2	1	1	0	2	1	1	0	3.9	3.9	3.9	74.34	643	643;711;708	0.0089445	1.4966	0.67013	0.60721	18.696	2	2	Median	0.67013	NaN	NaN	NaN	0.60721	NaN	NaN	NaN
DST	Dystonin	0.6201	NaN	1.0597	NaN	E9PHM6;F6QMI7;F8W9J4;Q03001-8;Q03001-14;Q03001;A0A0U1RQJ2;A0A494C1D7;H0YC82;Q03001-10	E9PHM6;F6QMI7;F8W9J4;Q03001-8;Q03001-14;Q03001	8;8;8;8;8;8;3;2;1;1	8;8;8;8;8;8;3;2;1;1	8;8;8;8;8;8;3;2;1;1	tr|E9PHM6|E9PHM6_HUMAN Isoform of Q03001, Dystonin OS=Homo sapiens OX=9606 GN=DST PE=1 SV=3;tr|F6QMI7|F6QMI7_HUMAN Isoform of Q03001, Dystonin OS=Homo sapiens OX=9606 GN=DST PE=1 SV=2;tr|F8W9J4|F8W9J4_HUMAN Isoform of Q03001, Dystonin OS=Homo sapiens OX=96	10	8	8	8	6	1	6	0	6	1	6	0	6	1	6	0	2	2	2	629.78	5497	5497;5537;7461;5171;5375;7570;2676;2383;448;447	0	30.636	0.68369	0.85506	36.402	12	4	Leave out requantified	0.67574	NaN	0.69174	NaN	0.6201	NaN	1.0597	NaN
TSFM	Elongation factor Ts, mitochondrial	0.6283	NaN	0.87846	NaN	P43897;P43897-2	P43897;P43897-2	2;1	2;1	1;1	sp|P43897|EFTS_HUMAN Elongation factor Ts, mitochondrial OS=Homo sapiens OX=9606 GN=TSFM PE=1 SV=2;sp|P43897-2|EFTS-2_HUMAN Isoform of P43897, Isoform 2 of Elongation factor Ts, mitochondrial OS=Homo sapiens OX=9606 GN=TSFM PE=1 SV=2	2	2	2	1	1	0	2	0	1	0	2	0	0	0	1	0	13.5	13.5	8.3	35.39	325	325;346	0	45.21	0.60315	0.74293	23.699	2	0	Median	0.65511	NaN	0.55532	NaN	0.6283	NaN	0.87846	NaN
ERCC6L	DNA excision repair protein ERCC-6-like	0.64589	NaN	NaN	NaN	B5MDQ0;Q2NKX8	B5MDQ0;Q2NKX8	1;1	1;1	1;1	tr|B5MDQ0|B5MDQ0_HUMAN Isoform of Q2NKX8, DNA excision repair protein ERCC-6-like OS=Homo sapiens OX=9606 GN=ERCC6L PE=1 SV=1;sp|Q2NKX8|ERC6L_HUMAN DNA excision repair protein ERCC-6-like OS=Homo sapiens OX=9606 GN=ERCC6L PE=1 SV=1	2	1	1	1	1	0	0	0	1	0	0	0	1	0	0	0	1.7	1.7	1.7	126.98	1127	1127;1250	0.00044583	3.3996	0.67042	0.64589	NaN	1	1	Median	0.67042	NaN	NaN	NaN	0.64589	NaN	NaN	NaN
CRABP2	Cellular retinoic acid-binding protein 2	0.652	NaN	1.059	NaN	Q5SYZ4;P29373	Q5SYZ4;P29373	3;3	3;3	3;3	tr|Q5SYZ4|Q5SYZ4_HUMAN Isoform of P29373, Cellular retinoic acid-binding protein 2 (Fragment) OS=Homo sapiens OX=9606 GN=CRABP2 PE=1 SV=1;sp|P29373|RABP2_HUMAN Cellular retinoic acid-binding protein 2 OS=Homo sapiens OX=9606 GN=CRABP2 PE=1 SV=2	2	3	3	3	1	0	3	0	1	0	3	0	1	0	3	0	43.9	43.9	43.9	9.2515	82	82;138	0.0019786	2.2151	0.60397	0.83093	34.296	2	0	Median	0.66044	NaN	0.55234	NaN	0.652	NaN	1.059	NaN
PODXL	Podocalyxin	0.65509	NaN	NaN	NaN	O00592-2;O00592	O00592-2;O00592	3;3	3;3	3;3	sp|O00592-2|PODXL-2_HUMAN Isoform of O00592, Isoform 2 of Podocalyxin OS=Homo sapiens OX=9606 GN=PODXL PE=1 SV=2;sp|O00592|PODXL_HUMAN Podocalyxin OS=Homo sapiens OX=9606 GN=PODXL PE=1 SV=2	2	3	3	3	3	0	0	0	3	0	0	0	3	0	0	0	7.2	7.2	7.2	55.385	526	526;558	0.0023077	2.0118	0.68722	0.65509	17.844	2	1	Median	0.68722	NaN	NaN	NaN	0.65509	NaN	NaN	NaN
KIF18B	Kinesin-like protein KIF18B	0.6616	NaN	0.56068	NaN	A0A494BYR6;Q86Y91-6;Q86Y91	A0A494BYR6;Q86Y91-6;Q86Y91	1;1;1	1;1;1	1;1;1	tr|A0A494BYR6|A0A494BYR6_HUMAN Isoform of Q86Y91, Kinesin-like protein KIF18B OS=Homo sapiens OX=9606 GN=KIF18B PE=4 SV=1;sp|Q86Y91-6|KI18B-6_HUMAN Isoform of Q86Y91, Isoform 2 of Kinesin-like protein KIF18B OS=Homo sapiens OX=9606 GN=KIF18B PE=1 SV=4;sp|Q	3	1	1	1	1	0	1	0	1	0	1	0	1	0	1	0	2	2	2	91.964	842	842;833;852	0	3.9568	0.52617	0.60905	11.704	2	0	Median	0.70845	NaN	0.39079	NaN	0.6616	NaN	0.56068	NaN
GLB1	Beta-galactosidase	0.67418	NaN	0.5452	NaN	C9J4G9;E7EQ29;P16278-2;P16278-3;P16278	C9J4G9;E7EQ29;P16278-2;P16278-3;P16278	1;1;1;1;1	1;1;1;1;1	1;1;1;1;1	tr|C9J4G9|C9J4G9_HUMAN Isoform of P16278, Beta-galactosidase (Fragment) OS=Homo sapiens OX=9606 GN=GLB1 PE=1 SV=1;tr|E7EQ29|E7EQ29_HUMAN Isoform of P16278, Beta-galactosidase OS=Homo sapiens OX=9606 GN=GLB1 PE=1 SV=1;sp|P16278-2|BGAL-2_HUMAN Isoform of P16	5	1	1	1	1	0	1	0	1	0	1	0	1	0	1	0	7.6	7.6	7.6	20.579	185	185;546;546;647;677	0.0019778	2.2092	0.57395	0.60627	15.016	2	0	Median	0.72181	NaN	0.45639	NaN	0.67418	NaN	0.5452	NaN
NHSL1	NHS-like protein 1	0.67687	NaN	NaN	NaN	Q5SYE7-2;Q5SYE7	Q5SYE7-2;Q5SYE7	1;1	1;1	1;1	sp|Q5SYE7-2|NHSL1-2_HUMAN Isoform of Q5SYE7, Isoform 2 of NHS-like protein 1 OS=Homo sapiens OX=9606 GN=NHSL1 PE=1 SV=2;sp|Q5SYE7|NHSL1_HUMAN NHS-like protein 1 OS=Homo sapiens OX=9606 GN=NHSL1 PE=1 SV=2	2	1	1	1	1	0	0	0	1	0	0	0	1	0	0	0	1.6	1.6	1.6	170.47	1606	1606;1610	0	10.105	0.71594	0.67687	NaN	1	0	Median	0.71594	NaN	NaN	NaN	0.67687	NaN	NaN	NaN
REPS1	RalBP1-associated Eps domain-containing protein 1	0.67872	NaN	NaN	NaN	Q96D71-3;Q96D71;H0YE89;H0YE73;H0YCR2;E9PMG1;H0YDT0;Q96D71-2;Q96D71-4	Q96D71-3;Q96D71;H0YE89;H0YE73;H0YCR2;E9PMG1;H0YDT0;Q96D71-2;Q96D71-4	2;2;1;1;1;1;1;1;1	2;2;1;1;1;1;1;1;1	2;2;1;1;1;1;1;1;1	sp|Q96D71-3|REPS1-3_HUMAN Isoform of Q96D71, Isoform 3 of RalBP1-associated Eps domain-containing protein 1 OS=Homo sapiens OX=9606 GN=REPS1 PE=1 SV=3;sp|Q96D71|REPS1_HUMAN RalBP1-associated Eps domain-containing protein 1 OS=Homo sapiens OX=9606 GN=REPS1	9	2	2	2	1	0	1	0	1	0	1	0	1	0	1	0	5.8	5.8	5.8	86.59	795	795;796;61;146;152;737;754;705;769	0	8.6183	0.70764	0.67872	14.438	2	0	Median	0.70764	NaN	NaN	NaN	0.67872	NaN	NaN	NaN
RAB3GAP1	Rab3 GTPase-activating protein catalytic subunit	0.68103	NaN	0.5966	NaN	Q15042-4;Q15042;Q15042-3	Q15042-4;Q15042;Q15042-3	2;2;2	2;2;2	2;2;2	sp|Q15042-4|RB3GP-4_HUMAN Isoform of Q15042, Isoform 3 of Rab3 GTPase-activating protein catalytic subunit OS=Homo sapiens OX=9606 GN=RAB3GAP1 PE=1 SV=3;sp|Q15042|RB3GP_HUMAN Rab3 GTPase-activating protein catalytic subunit OS=Homo sapiens OX=9606 GN=RAB3G	3	2	2	2	1	0	1	0	1	0	1	0	1	0	1	0	3.7	3.7	3.7	105.29	935	935;981;988	0	3.8288	0.5549	0.63742	9.3596	2	1	Median	0.7174	NaN	0.42921	NaN	0.68103	NaN	0.5966	NaN
MIA2	Melanoma inhibitory activity protein 2	0.69231	NaN	0.77754	NaN	G3V599;Q96PC5-6;Q96PC5-11;Q96PC5-13;Q96PC5-10;Q96PC5-9;Q96PC5-14;Q96PC5-7;Q96PC5-12;Q96PC5	G3V599;Q96PC5-6;Q96PC5-11;Q96PC5-13;Q96PC5-10;Q96PC5-9;Q96PC5-14;Q96PC5-7;Q96PC5-12;Q96PC5	1;1;1;1;1;1;1;1;1;1	1;1;1;1;1;1;1;1;1;1	1;1;1;1;1;1;1;1;1;1	tr|G3V599|G3V599_HUMAN Isoform of Q96PC5, Melanoma inhibitory activity protein 2 OS=Homo sapiens OX=9606 GN=MIA2 PE=1 SV=1;sp|Q96PC5-6|MIA2-6_HUMAN Isoform of Q96PC5, Isoform 5 of Melanoma inhibitory activity protein 2 OS=Homo sapiens OX=9606 GN=MIA2 PE=1	10	1	1	1	1	0	1	0	1	0	1	0	1	0	1	0	1	1	1	151.72	1339	1339;672;724;729;771;775;792;804;809;1412	0.002305	2.0067	0.63043	0.73369	8.2097	2	0	Median	0.73415	NaN	0.54137	NaN	0.69231	NaN	0.77754	NaN
RBM34	RNA-binding protein 34	0.69277	NaN	0.8291	NaN	A2A2V2;P42696-2;P42696;Q5TCT4	A2A2V2;P42696-2;P42696;Q5TCT4	2;2;2;1	2;2;2;1	2;2;2;1	tr|A2A2V2|A2A2V2_HUMAN Isoform of P42696, RNA-binding protein 34 (Fragment) OS=Homo sapiens OX=9606 GN=RBM34 PE=1 SV=1;sp|P42696-2|RBM34-2_HUMAN Isoform of P42696, Isoform 2 of RNA-binding protein 34 OS=Homo sapiens OX=9606 GN=RBM34 PE=1 SV=2;sp|P42696|RBM	4	2	2	2	1	0	1	2	1	0	1	2	1	0	1	2	7.1	7.1	7.1	45.917	408	408;225;430;211	0	7.211	0.67026	0.75787	12.703	2	0	Median	0.73594	NaN	0.61044	NaN	0.69277	NaN	0.8291	NaN
NAPA	Alpha-soluble NSF attachment protein	0.70322	NaN	1.2173	NaN	M0R0Y2;M0R2M1;P54920	M0R0Y2;M0R2M1;P54920	1;1;1	1;1;1	1;1;1	tr|M0R0Y2|M0R0Y2_HUMAN Isoform of P54920, Alpha-soluble NSF attachment protein OS=Homo sapiens OX=9606 GN=NAPA PE=1 SV=1;tr|M0R2M1|M0R2M1_HUMAN Isoform of P54920, Alpha-soluble NSF attachment protein (Fragment) OS=Homo sapiens OX=9606 GN=NAPA PE=1 SV=1;sp|	3	1	1	1	1	0	1	0	1	0	1	0	1	0	1	0	5.9	5.9	5.9	29.163	256	256;268;295	0.0023166	2.0296	0.83951	0.92522	38.8	2	0	Median	0.74019	NaN	0.95215	NaN	0.70322	NaN	1.2173	NaN
SH3BP1	SH3 domain-binding protein 1	0.70485	NaN	0.89033	NaN	Q6ZT62-2;Q6ZT62;Q9Y3L3-2;Q9Y3L3	Q6ZT62-2;Q6ZT62;Q9Y3L3-2;Q9Y3L3	2;2;2;2	2;2;2;2	2;2;2;2	sp|Q6ZT62-2|BGIN-2_HUMAN Isoform of Q6ZT62, Isoform Short BGIN of Bargin OS=Homo sapiens OX=9606 GN=BARGIN PE=1 SV=2;sp|Q6ZT62|BGIN_HUMAN Bargin OS=Homo sapiens OX=9606 GN=BARGIN PE=1 SV=2;sp|Q9Y3L3-2|3BP1-2_HUMAN Isoform of Q9Y3L3, Isoform 2 of SH3 domain	4	2	2	2	2	0	1	0	2	0	1	0	2	0	1	0	4	4	4	66.18	605	605;677;452;701	0	3.6401	0.64455	0.89033	41.2	3	1	Median	0.78234	NaN	0.64455	NaN	0.70485	NaN	0.89033	NaN
MAP1A	Microtubule-associated protein 1A;MAP1A heavy chain;MAP1 light chain LC2	0.71088	NaN	1.6089	NaN	E9PGC8;P78559;P78559-2	E9PGC8;P78559;P78559-2	1;1;1	1;1;1	1;1;1	tr|E9PGC8|E9PGC8_HUMAN Isoform of P78559, Microtubule-associated protein 1A OS=Homo sapiens OX=9606 GN=MAP1A PE=1 SV=1;sp|P78559|MAP1A_HUMAN Microtubule-associated protein 1A OS=Homo sapiens OX=9606 GN=MAP1A PE=1 SV=6;sp|P78559-2|MAP1A-2_HUMAN Isoform of P	3	1	1	1	1	0	1	0	1	0	1	0	1	0	1	0	0.5	0.5	0.5	331.25	3041	3041;2803;2805	0	5.9307	0.88353	1.0695	57.757	2	1	Median	0.72235	NaN	1.0807	NaN	0.71088	NaN	1.6089	NaN
ABT1	Activator of basal transcription 1	0.71458	NaN	NaN	NaN	Q9ULW3	Q9ULW3	2	2	2	sp|Q9ULW3|ABT1_HUMAN Activator of basal transcription 1 OS=Homo sapiens OX=9606 GN=ABT1 PE=1 SV=1	1	2	2	2	1	0	1	0	1	0	1	0	1	0	1	0	8.8	8.8	8.8	31.079	272	272	0.00084388	2.7514	0.73686	0.71458	NaN	1	0	Median	0.73686	NaN	NaN	NaN	0.71458	NaN	NaN	NaN
SEL1L	Protein sel-1 homolog 1	0.71586	NaN	1.0409	NaN	Q9UBV2	Q9UBV2	1	1	1	sp|Q9UBV2|SE1L1_HUMAN Protein sel-1 homolog 1 OS=Homo sapiens OX=9606 GN=SEL1L PE=1 SV=3	1	1	1	1	1	0	1	0	1	0	1	0	1	0	1	0	2.5	2.5	2.5	88.754	794	794	0.00043879	3.2402	0.72227	0.8632	26.47	2	1	Median	0.788	NaN	0.66202	NaN	0.71586	NaN	1.0409	NaN
AARS	Alanine--tRNA ligase, cytoplasmic	0.73547	NaN	0.9265	NaN	P49588-2;P49588;H3BPK7	P49588-2;P49588	5;5;2	5;5;2	5;5;2	sp|P49588-2|SYAC-2_HUMAN Isoform of P49588, Isoform 2 of Alanine--tRNA ligase, cytoplasmic OS=Homo sapiens OX=9606 GN=AARS PE=1 SV=2;sp|P49588|SYAC_HUMAN Alanine--tRNA ligase, cytoplasmic OS=Homo sapiens OX=9606 GN=AARS PE=1 SV=2	3	5	5	5	3	0	4	0	3	0	4	0	3	0	4	0	6.8	6.8	6.8	109.32	992	992;968;280	0	9.8502	0.71996	0.78908	16.136	7	1	Leave out requantified	0.79768	NaN	0.66654	NaN	0.73547	NaN	0.9265	NaN
ARHGEF12	Rho guanine nucleotide exchange factor 12	0.73826	NaN	0.62512	NaN	Q9NZN5-2;Q9NZN5	Q9NZN5-2;Q9NZN5	1;1	1;1	1;1	sp|Q9NZN5-2|ARHGC-2_HUMAN Isoform of Q9NZN5, Isoform 2 of Rho guanine nucleotide exchange factor 12 OS=Homo sapiens OX=9606 GN=ARHGEF12 PE=1 SV=1;sp|Q9NZN5|ARHGC_HUMAN Rho guanine nucleotide exchange factor 12 OS=Homo sapiens OX=9606 GN=ARHGEF12 PE=1 SV=1	2	1	1	1	1	0	1	0	1	0	1	0	1	0	1	0	0.9	0.9	0.9	171.11	1525	1525;1544	0.00044072	3.3129	0.57971	0.67934	11.762	2	0	Median	0.74465	NaN	0.4513	NaN	0.73826	NaN	0.62512	NaN
CYB5B	Cytochrome b5 type B	0.73985	NaN	1.1432	NaN	D6RFH4;H3BUX2;O43169	D6RFH4;H3BUX2;O43169	1;1;1	1;1;1	1;1;1	tr|D6RFH4|D6RFH4_HUMAN Isoform of O43169, Cytochrome b5 type B OS=Homo sapiens OX=9606 GN=CYB5B PE=1 SV=1;tr|H3BUX2|H3BUX2_HUMAN Isoform of O43169, Cytochrome b5 type B OS=Homo sapiens OX=9606 GN=CYB5B PE=1 SV=1;sp|O43169|CYB5B_HUMAN Cytochrome b5 type B O	3	1	1	1	1	0	1	0	1	0	1	0	1	0	1	0	9.2	9.2	9.2	14.846	131	131;140;150	0.00082542	2.5265	0.7001	0.91968	30.769	2	0	Median	0.73756	NaN	0.66455	NaN	0.73985	NaN	1.1432	NaN
EXOC4	Exocyst complex component 4	0.7399	NaN	1.1999	NaN	Q96A65;Q96A65-2	Q96A65	4;1	4;1	4;1	sp|Q96A65|EXOC4_HUMAN Exocyst complex component 4 OS=Homo sapiens OX=9606 GN=EXOC4 PE=1 SV=1	2	4	4	4	4	0	1	0	4	0	1	0	4	0	1	0	6.5	6.5	6.5	110.5	974	974;473	0	9.7632	0.7857	0.7399	18.68	4	1	Leave out requantified	0.7857	NaN	0.80789	NaN	0.7399	NaN	1.1999	NaN
IPO11	Importin-11	0.74051	NaN	1.1273	NaN	F8WDV0;Q9UI26;Q9UI26-2;H0Y8M5;D6RJB1	F8WDV0;Q9UI26;Q9UI26-2;H0Y8M5;D6RJB1	2;2;2;1;1	2;2;2;1;1	2;2;2;1;1	tr|F8WDV0|F8WDV0_HUMAN Isoform of Q9UI26, Importin-11 OS=Homo sapiens OX=9606 GN=IPO11 PE=1 SV=1;sp|Q9UI26|IPO11_HUMAN Importin-11 OS=Homo sapiens OX=9606 GN=IPO11 PE=1 SV=1;sp|Q9UI26-2|IPO11-2_HUMAN Isoform of Q9UI26, Isoform 2 of Importin-11 OS=Homo sapi	5	2	2	2	1	0	2	1	1	0	2	1	1	0	2	1	3.4	3.4	3.4	99.707	863	863;975;1015;160;162	0	4.4151	0.80188	0.98386	27.819	3	1	Median	0.80188	NaN	0.75766	NaN	0.74051	NaN	1.1273	NaN
PPP1R7	Protein phosphatase 1 regulatory subunit 7	0.74103	NaN	0.83739	NaN	B5MBZ8;C9JD73;C9J177;H7C003;Q15435-5;Q15435-4;Q15435-3;Q15435-2;Q15435	B5MBZ8;C9JD73;C9J177;H7C003;Q15435-5;Q15435-4;Q15435-3;Q15435-2;Q15435	1;1;1;1;1;1;1;1;1	1;1;1;1;1;1;1;1;1	1;1;1;1;1;1;1;1;1	tr|B5MBZ8|B5MBZ8_HUMAN Isoform of Q15435, Protein phosphatase 1 regulatory subunit 7 OS=Homo sapiens OX=9606 GN=PPP1R7 PE=1 SV=1;tr|C9JD73|C9JD73_HUMAN Isoform of Q15435, Protein phosphatase 1 regulatory subunit 7 (Fragment) OS=Homo sapiens OX=9606 GN=PPP1	9	1	1	1	1	1	1	0	1	1	1	0	1	1	1	0	4	4	4	31.357	274	274;282;289;335;221;237;280;317;360	0.0073502	1.6466	0.70398	0.78774	8.6442	2	0	Median	0.77513	NaN	0.63936	NaN	0.74103	NaN	0.83739	NaN
ACTR6	Actin-related protein 6	0.75086	NaN	0.59227	NaN	G3V1Y1;Q9GZN1	G3V1Y1;Q9GZN1	1;1	1;1	1;1	tr|G3V1Y1|G3V1Y1_HUMAN Isoform of Q9GZN1, ARP6 actin-related protein 6 homolog (Yeast), isoform CRA_d OS=Homo sapiens OX=9606 GN=ACTR6 PE=1 SV=1;sp|Q9GZN1|ARP6_HUMAN Actin-related protein 6 OS=Homo sapiens OX=9606 GN=ACTR6 PE=1 SV=1	2	1	1	1	1	0	1	0	1	0	1	0	1	0	1	0	4.8	4.8	4.8	36.321	314	314;396	0.002341	2.1033	0.59977	0.66687	16.777	2	1	Median	0.77088	NaN	0.46665	NaN	0.75086	NaN	0.59227	NaN
EMILIN3	EMILIN-3	0.75284	NaN	NaN	NaN	Q9NT22-2;Q9NT22	Q9NT22-2;Q9NT22	2;2	2;2	2;2	sp|Q9NT22-2|EMIL3-2_HUMAN Isoform of Q9NT22, Isoform 2 of EMILIN-3 OS=Homo sapiens OX=9606 GN=EMILIN3 PE=2 SV=2;sp|Q9NT22|EMIL3_HUMAN EMILIN-3 OS=Homo sapiens OX=9606 GN=EMILIN3 PE=1 SV=2	2	2	2	2	1	0	1	0	1	0	1	0	1	0	1	0	7.5	7.5	7.5	39.603	372	372;766	0.0019818	2.223	0.82767	0.75284	NaN	1	0	Median	0.82767	NaN	NaN	NaN	0.75284	NaN	NaN	NaN
RNF214	RING finger protein 214	0.75576	NaN	0.81764	NaN	E9PN76;Q8ND24-2;Q8ND24	E9PN76;Q8ND24-2;Q8ND24	1;1;1	1;1;1	1;1;1	tr|E9PN76|E9PN76_HUMAN Isoform of Q8ND24, RING finger protein 214 OS=Homo sapiens OX=9606 GN=RNF214 PE=1 SV=1;sp|Q8ND24-2|RN214-2_HUMAN Isoform of Q8ND24, Isoform 2 of RING finger protein 214 OS=Homo sapiens OX=9606 GN=RNF214 PE=1 SV=2;sp|Q8ND24|RN214_HUMA	3	1	1	1	1	0	1	0	1	0	1	0	1	0	1	0	5.3	5.3	5.3	57.571	513	513;548;703	0	16.432	0.68428	0.78609	5.5653	2	1	Median	0.83414	NaN	0.56134	NaN	0.75576	NaN	0.81764	NaN
RBPMS2	RNA-binding protein with multiple splicing 2	0.75818	NaN	0.79281	NaN	Q6ZRY4	Q6ZRY4	2	2	2	sp|Q6ZRY4|RBPS2_HUMAN RNA-binding protein with multiple splicing 2 OS=Homo sapiens OX=9606 GN=RBPMS2 PE=1 SV=1	1	2	2	2	1	1	1	0	1	1	1	0	1	1	1	0	21.1	21.1	21.1	22.496	209	209	0	6.3982	0.63092	0.7753	3.1581	2	0	Median	0.75056	NaN	0.53035	NaN	0.75818	NaN	0.79281	NaN
CTBP1	C-terminal-binding protein 1	0.75819	NaN	NaN	NaN	E9PGB1;E7ESU7;D6RAX2;E7EPF8;Q13363-2;Q13363;E7EUB3;H0Y8W7	E9PGB1;E7ESU7;D6RAX2;E7EPF8;Q13363-2;Q13363;E7EUB3;H0Y8W7	2;2;2;2;2;2;1;1	1;1;1;1;1;1;0;1	1;1;1;1;1;1;0;1	tr|E9PGB1|E9PGB1_HUMAN Isoform of Q13363, C-terminal-binding protein 1 (Fragment) OS=Homo sapiens OX=9606 GN=CTBP1 PE=1 SV=1;tr|E7ESU7|E7ESU7_HUMAN Isoform of Q13363, C-terminal-binding protein 1 (Fragment) OS=Homo sapiens OX=9606 GN=CTBP1 PE=1 SV=1;tr|D6R	8	2	1	1	2	1	0	0	1	0	0	0	1	0	0	0	13.8	7.6	7.6	15.917	145	145;171;186;202;429;440;168;287	0.009915	1.443	0.82877	0.75819	NaN	1	0	Median	0.82877	NaN	NaN	NaN	0.75819	NaN	NaN	NaN
TTI1	TELO2-interacting protein 1 homolog	0.76959	NaN	NaN	NaN	O43156	O43156	2	2	2	sp|O43156|TTI1_HUMAN TELO2-interacting protein 1 homolog OS=Homo sapiens OX=9606 GN=TTI1 PE=1 SV=3	1	2	2	2	1	0	1	0	1	0	1	0	1	0	1	0	2.7	2.7	2.7	122.07	1089	1089	0.0066519	1.6839	0.85272	0.76959	NaN	1	1	Median	0.85272	NaN	NaN	NaN	0.76959	NaN	NaN	NaN
TERF2IP	Telomeric repeat-binding factor 2-interacting protein 1	0.77176	NaN	0.66145	NaN	Q9NYB0	Q9NYB0	1	1	1	sp|Q9NYB0|TE2IP_HUMAN Telomeric repeat-binding factor 2-interacting protein 1 OS=Homo sapiens OX=9606 GN=TERF2IP PE=1 SV=1	1	1	1	1	1	0	1	1	1	0	1	1	1	0	1	1	7.3	7.3	7.3	44.259	399	399	0	12.232	0.63533	0.71448	10.907	2	1	Median	0.80597	NaN	0.50081	NaN	0.77176	NaN	0.66145	NaN
SUDS3	Sin3 histone deacetylase corepressor complex component SDS3	0.78145	NaN	NaN	NaN	Q9H7L9	Q9H7L9	1	1	1	sp|Q9H7L9|SDS3_HUMAN Sin3 histone deacetylase corepressor complex component SDS3 OS=Homo sapiens OX=9606 GN=SUDS3 PE=1 SV=2	1	1	1	1	1	1	1	1	1	1	1	1	1	1	1	1	4.6	4.6	4.6	38.136	328	328	0	35.865	0.83769	0.78145	NaN	1	1	Median	0.83769	NaN	NaN	NaN	0.78145	NaN	NaN	NaN
PRRC2B		0.7917	NaN	1.4211	NaN	H0Y412	H0Y412	4	1	1	tr|H0Y412|H0Y412_HUMAN Isoform of Q5JSZ5, Protein PRRC2B (Fragment) OS=Homo sapiens OX=9606 GN=PRRC2B PE=1 SV=1	1	4	1	1	3	1	2	0	1	0	1	0	1	0	1	0	11.9	2.9	2.9	63.197	588	588	0.00081301	2.4205	0.87482	1.0607	41.365	2	0	Median	0.84173	NaN	0.90921	NaN	0.7917	NaN	1.4211	NaN
COG8	Conserved oligomeric Golgi complex subunit 8	0.79528	NaN	NaN	NaN	H3BMQ9;H3BQV3;B4DYU2;Q96MW5	H3BMQ9;H3BQV3;B4DYU2;Q96MW5	1;1;1;1	1;1;1;1	1;1;1;1	tr|H3BMQ9|H3BMQ9_HUMAN Uncharacterized protein (Fragment) OS=Homo sapiens OX=9606 PE=4 SV=1;tr|H3BQV3|H3BQV3_HUMAN Isoform of Q96MW5, Conserved oligomeric Golgi complex subunit 8 OS=Homo sapiens OX=9606 GN=COG8 PE=1 SV=1;tr|B4DYU2|B4DYU2_HUMAN Isoform of Q	4	1	1	1	1	0	0	0	1	0	0	0	1	0	0	0	10.9	10.9	10.9	18.353	156	156;534;639;612	0.00083577	2.6399	0.88648	0.79528	NaN	1	0	Median	0.88648	NaN	NaN	NaN	0.79528	NaN	NaN	NaN
CECR5	Cat eye syndrome critical region protein 5	0.80097	NaN	NaN	NaN	Q9BXW7;Q9BXW7-2;A8MYZ9	Q9BXW7;Q9BXW7-2	3;3;1	3;3;1	3;3;1	sp|Q9BXW7|HDHD5_HUMAN Haloacid dehalogenase-like hydrolase domain-containing 5 OS=Homo sapiens OX=9606 GN=HDHD5 PE=1 SV=1;sp|Q9BXW7-2|HDHD5-2_HUMAN Isoform of Q9BXW7, Isoform 1 of Haloacid dehalogenase-like hydrolase domain-containing 5 OS=Homo sapiens OX=	3	3	3	3	3	0	0	1	3	0	0	1	3	0	0	1	11.3	11.3	11.3	46.321	423	423;393;223	0	6.0807	0.85156	0.80097	14.14	2	0	Median	0.85156	NaN	NaN	NaN	0.80097	NaN	NaN	NaN
ACSL3	Long-chain-fatty-acid--CoA ligase 3	0.81349	NaN	0.94192	NaN	O95573;O60488-2;O60488	O95573	4;1;1	4;1;1	4;1;1	sp|O95573|ACSL3_HUMAN Long-chain-fatty-acid--CoA ligase 3 OS=Homo sapiens OX=9606 GN=ACSL3 PE=1 SV=3	3	4	4	4	3	2	4	0	3	2	4	0	3	2	4	0	7.9	7.9	7.9	80.419	720	720;670;711	0	14.547	0.77791	0.88057	8.9976	7	2	Leave out requantified	0.90891	NaN	0.63957	NaN	0.81349	NaN	0.94192	NaN
SIRT7	NAD-dependent protein deacetylase sirtuin-7	0.81503	NaN	0.28855	NaN	Q9NRC8	Q9NRC8	1	1	1	sp|Q9NRC8|SIR7_HUMAN NAD-dependent protein deacetylase sirtuin-7 OS=Homo sapiens OX=9606 GN=SIRT7 PE=1 SV=1	1	1	1	1	1	0	1	0	1	0	1	0	1	0	1	0	4	4	4	44.898	400	400	0	15.271	0.44272	0.48495	73.423	2	0	Median	0.82881	NaN	0.23649	NaN	0.81503	NaN	0.28855	NaN
CNOT3	CCR4-NOT transcription complex subunit 3	0.82346	NaN	1.58	NaN	H7C3F5;A0A2H2FJL5;B7Z6J7;O75175;A0A2R8Y4W0;H0Y5X7;A0A2R8Y6N5;A0A2R8Y691;A0A0G2JNJ7;H7C148	H7C3F5;A0A2H2FJL5;B7Z6J7;O75175;A0A2R8Y4W0;H0Y5X7	3;3;3;3;2;2;1;1;1;1	3;3;3;3;2;2;1;1;1;1	3;3;3;3;2;2;1;1;1;1	tr|H7C3F5|H7C3F5_HUMAN Isoform of O75175, CCR4-NOT transcription complex subunit 3 OS=Homo sapiens OX=9606 GN=CNOT3 PE=1 SV=2;tr|A0A2H2FJL5|A0A2H2FJL5_HUMAN Isoform of O75175, CCR4-NOT transcription complex subunit 3 OS=Homo sapiens OX=9606 GN=CNOT3 PE=1 S	10	3	3	3	3	0	2	0	3	0	2	0	3	0	2	0	8.9	8.9	8.9	58.866	571	571;571;718;753;156;288;20;156;375;455	0	5.6727	0.89029	0.9478	75.421	4	3	Median	0.89029	NaN	1.0099	NaN	0.82346	NaN	1.58	NaN
KLC2	Kinesin light chain 2	0.82446	NaN	NaN	NaN	Q9H0B6;Q9H0B6-2;A8MZ87	Q9H0B6;Q9H0B6-2;A8MZ87	2;2;1	2;2;1	2;2;1	sp|Q9H0B6|KLC2_HUMAN Kinesin light chain 2 OS=Homo sapiens OX=9606 GN=KLC2 PE=1 SV=1;sp|Q9H0B6-2|KLC2-2_HUMAN Isoform of Q9H0B6, Isoform 2 of Kinesin light chain 2 OS=Homo sapiens OX=9606 GN=KLC2 PE=1 SV=1;tr|A8MZ87|A8MZ87_HUMAN Isoform of Q9H0B6, Kinesin	3	2	2	2	2	0	0	0	2	0	0	0	2	0	0	0	4.8	4.8	4.8	68.934	622	622;545;521	0.00082338	2.5133	0.9083	0.82446	NaN	1	1	Median	0.9083	NaN	NaN	NaN	0.82446	NaN	NaN	NaN
MAST2	Microtubule-associated serine/threonine-protein kinase 2	0.82958	NaN	NaN	NaN	Q6P0Q8-2;Q6P0Q8	Q6P0Q8-2;Q6P0Q8	1;1	1;1	1;1	sp|Q6P0Q8-2|MAST2-2_HUMAN Isoform of Q6P0Q8, Isoform 2 of Microtubule-associated serine/threonine-protein kinase 2 OS=Homo sapiens OX=9606 GN=MAST2 PE=1 SV=2;sp|Q6P0Q8|MAST2_HUMAN Microtubule-associated serine/threonine-protein kinase 2 OS=Homo sapiens OX=	2	1	1	1	1	0	0	0	1	0	0	0	1	0	0	0	0.9	0.9	0.9	176.13	1608	1608;1798	0.00083195	2.5919	0.84429	0.82958	NaN	1	0	Median	0.84429	NaN	NaN	NaN	0.82958	NaN	NaN	NaN
DOCK1	Dedicator of cytokinesis protein 1	0.83409	NaN	0.69665	NaN	A0A096LNH6;Q14185	A0A096LNH6;Q14185	2;2	2;2	2;2	tr|A0A096LNH6|A0A096LNH6_HUMAN Isoform of Q14185, Dedicator of cytokinesis protein 1 OS=Homo sapiens OX=9606 GN=DOCK1 PE=1 SV=1;sp|Q14185|DOCK1_HUMAN Dedicator of cytokinesis protein 1 OS=Homo sapiens OX=9606 GN=DOCK1 PE=1 SV=2	2	2	2	2	2	0	1	0	2	0	1	0	2	0	1	0	1	1	1	217.75	1886	1886;1865	0.0055824	1.7591	0.75329	0.69921	20.475	3	0	Median	0.89028	NaN	0.47262	NaN	0.83409	NaN	0.69665	NaN
PRR12	Proline-rich protein 12	0.83498	NaN	NaN	NaN	A0A3Q5ADB5;Q9ULL5-2;Q9ULL5	A0A3Q5ADB5;Q9ULL5-2;Q9ULL5	1;1;1	1;1;1	1;1;1	tr|A0A3Q5ADB5|A0A3Q5ADB5_HUMAN Isoform of Q9ULL5, Proline-rich protein 12 OS=Homo sapiens OX=9606 GN=PRR12 PE=1 SV=1;sp|Q9ULL5-2|PRR12-2_HUMAN Isoform of Q9ULL5, Isoform 2 of Proline-rich protein 12 OS=Homo sapiens OX=9606 GN=PRR12 PE=1 SV=3;sp|Q9ULL5|PRR1	3	1	1	1	1	0	0	0	1	0	0	0	1	0	0	0	1.9	1.9	1.9	129.99	1215	1215;1964;2036	0.0073233	1.6256	0.8422	0.83498	NaN	1	0	Median	0.8422	NaN	NaN	NaN	0.83498	NaN	NaN	NaN
RBM6	RNA-binding protein 6	0.83599	NaN	0.86907	NaN	F8WCA5;E9PGM9;P78332;P78332-3;P78332-2	F8WCA5;E9PGM9;P78332;P78332-3	3;3;3;2;1	3;3;3;2;1	3;3;3;2;1	tr|F8WCA5|F8WCA5_HUMAN Isoform of P78332, RNA-binding protein 6 OS=Homo sapiens OX=9606 GN=RBM6 PE=1 SV=1;tr|E9PGM9|E9PGM9_HUMAN Isoform of P78332, RNA-binding protein 6 OS=Homo sapiens OX=9606 GN=RBM6 PE=1 SV=1;sp|P78332|RBM6_HUMAN RNA-binding protein 6 O	5	3	3	3	2	0	3	0	2	0	3	0	2	0	3	0	8.8	8.8	8.8	80.389	697	697;991;1123;520;601	0	138.66	0.65576	0.83599	6.2307	3	0	Median	0.90338	NaN	0.59229	NaN	0.83599	NaN	0.86907	NaN
C1orf226	Uncharacterized protein C1orf226	0.83649	NaN	NaN	NaN	A1L170-2;A1L170;F8W6W0	A1L170-2;A1L170;F8W6W0	2;2;1	2;2;1	2;2;1	sp|A1L170-2|CA226-2_HUMAN Isoform of A1L170, Isoform 2 of Uncharacterized protein C1orf226 OS=Homo sapiens OX=9606 GN=C1orf226 PE=1 SV=1;sp|A1L170|CA226_HUMAN Uncharacterized protein C1orf226 OS=Homo sapiens OX=9606 GN=C1orf226 PE=1 SV=1;tr|F8W6W0|F8W6W0_H	3	2	2	2	2	1	1	0	2	1	1	0	2	1	1	0	8.3	8.3	8.3	33.692	315	315;272;171	0	25.369	0.89609	0.83649	NaN	1	0	Median	0.89609	NaN	NaN	NaN	0.83649	NaN	NaN	NaN
FAT3	Protocadherin Fat 3	0.83862	NaN	NaN	NaN	E9PQ73;Q8TDW7;Q8TDW7-1	E9PQ73;Q8TDW7;Q8TDW7-1	1;1;1	1;1;1	1;1;1	tr|E9PQ73|E9PQ73_HUMAN Isoform of Q8TDW7, Protocadherin Fat 3 OS=Homo sapiens OX=9606 GN=FAT3 PE=1 SV=1;sp|Q8TDW7|FAT3_HUMAN Protocadherin Fat 3 OS=Homo sapiens OX=9606 GN=FAT3 PE=2 SV=3;sp|Q8TDW7-1|FAT3-1_HUMAN Isoform of Q8TDW7, Isoform 3 of Protocadheri	3	1	1	1	1	0	0	0	1	0	0	0	1	0	0	0	0.2	0.2	0.2	488.84	4439	4439;4557;4589	0.0092924	1.491	0.91606	0.83862	NaN	1	0	Median	0.91606	NaN	NaN	NaN	0.83862	NaN	NaN	NaN
PGD	6-phosphogluconate dehydrogenase, decarboxylating	0.83995	NaN	0.87966	NaN	P52209-2;P52209;K7EM49;K7EPF6;K7EMN2;K7ELN9	P52209-2;P52209;K7EM49;K7EPF6;K7EMN2	7;7;5;5;4;1	7;7;5;5;4;1	7;7;5;5;4;1	sp|P52209-2|6PGD-2_HUMAN Isoform of P52209, Isoform 2 of 6-phosphogluconate dehydrogenase, decarboxylating OS=Homo sapiens OX=9606 GN=PGD PE=1 SV=3;sp|P52209|6PGD_HUMAN 6-phosphogluconate dehydrogenase, decarboxylating OS=Homo sapiens OX=9606 GN=PGD PE=1 S	6	7	7	7	7	0	5	0	7	0	5	0	7	0	5	0	21.9	21.9	21.9	51.872	470	470;483;205;256;160;224	0	12.748	0.76913	0.85816	4.0678	11	0	Leave out requantified	0.9156	NaN	0.64203	NaN	0.83995	NaN	0.87966	NaN
NKIRAS1	NF-kappa-B inhibitor-interacting Ras-like protein 1	0.84241	NaN	1.005	NaN	G5E9P3;Q9NYS0	G5E9P3;Q9NYS0	1;1	1;1	1;1	tr|G5E9P3|G5E9P3_HUMAN Isoform of Q9NYS0, NF-kappa-B inhibitor-interacting Ras-like protein 1 OS=Homo sapiens OX=9606 GN=NKIRAS1 PE=1 SV=1;sp|Q9NYS0|KBRS1_HUMAN NF-kappa-B inhibitor-interacting Ras-like protein 1 OS=Homo sapiens OX=9606 GN=NKIRAS1 PE=1 SV=	2	1	1	1	1	0	1	0	1	0	1	0	1	0	1	0	6.2	6.2	6.2	21.644	192	192;192	0.00085143	2.8698	0.76732	0.92013	12.48	2	0	Median	0.86777	NaN	0.6785	NaN	0.84241	NaN	1.005	NaN
ODF2	Outer dense fiber protein 2	0.84458	NaN	NaN	NaN	Q5T4C3;Q5BJF6-9;Q5BJF6-8;Q5BJF6-5;Q5BJF6-6;Q5BJF6-10;Q5BJF6-7;Q5BJF6-2;Q5BJF6-3;Q5BJF6-4;Q5BJF6	Q5T4C3;Q5BJF6-9;Q5BJF6-8;Q5BJF6-5;Q5BJF6-6;Q5BJF6-10;Q5BJF6-7;Q5BJF6-2;Q5BJF6-3;Q5BJF6-4;Q5BJF6	1;1;1;1;1;1;1;1;1;1;1	1;1;1;1;1;1;1;1;1;1;1	1;1;1;1;1;1;1;1;1;1;1	tr|Q5T4C3|Q5T4C3_HUMAN Isoform of Q5BJF6, Outer dense fiber protein 2 (Fragment) OS=Homo sapiens OX=9606 GN=ODF2 PE=1 SV=2;sp|Q5BJF6-9|ODFP2-9_HUMAN Isoform of Q5BJF6, Isoform 9 of Outer dense fiber protein 2 OS=Homo sapiens OX=9606 GN=ODF2 PE=1 SV=1;sp|Q5	11	1	1	1	1	0	0	0	1	0	0	0	1	0	0	0	2.8	2.8	2.8	44.334	386	386;576;638;638;657;657;701;763;805;824;829	0.0073665	1.6533	0.86454	0.84458	NaN	1	0	Median	0.86454	NaN	NaN	NaN	0.84458	NaN	NaN	NaN
CASP2	Caspase-2;Caspase-2 subunit p18;Caspase-2 subunit p13;Caspase-2 subunit p12	0.84757	NaN	NaN	NaN	P42575-2;P42575	P42575-2;P42575	2;2	2;2	2;2	sp|P42575-2|CASP2-2_HUMAN Isoform of P42575, Isoform 2 of Caspase-2 OS=Homo sapiens OX=9606 GN=CASP2 PE=1 SV=2;sp|P42575|CASP2_HUMAN Caspase-2 OS=Homo sapiens OX=9606 GN=CASP2 PE=1 SV=2	2	2	2	2	1	0	0	1	1	0	0	1	1	0	0	1	9.6	9.6	9.6	34.923	313	313;452	0.0082973	1.5491	0.91965	0.84757	NaN	1	0	Median	0.91965	NaN	NaN	NaN	0.84757	NaN	NaN	NaN
VPS52	Vacuolar protein sorting-associated protein 52 homolog	0.85103	NaN	NaN	NaN	Q8N1B4-2;Q8N1B4	Q8N1B4-2;Q8N1B4	2;2	2;2	2;2	sp|Q8N1B4-2|VPS52-2_HUMAN Isoform of Q8N1B4, Isoform 2 of Vacuolar protein sorting-associated protein 52 homolog OS=Homo sapiens OX=9606 GN=VPS52 PE=1 SV=1;sp|Q8N1B4|VPS52_HUMAN Vacuolar protein sorting-associated protein 52 homolog OS=Homo sapiens OX=9606	2	2	2	2	2	0	0	0	2	0	0	0	2	0	0	0	3.5	3.5	3.5	68.495	598	598;723	0	3.4236	0.90242	0.85103	0.18454	2	0	Median	0.90242	NaN	NaN	NaN	0.85103	NaN	NaN	NaN
CACNA2D3	Voltage-dependent calcium channel subunit alpha-2/delta-3;Voltage-dependent calcium channel subunit alpha-2-3;Voltage-dependent calcium channel subunit delta-3	0.85295	NaN	NaN	NaN	F8WAV4;C9JAV5;B4DSF6;Q8IZS8-3;Q8IZS8-2;Q8IZS8	F8WAV4;C9JAV5;B4DSF6;Q8IZS8-3;Q8IZS8-2;Q8IZS8	1;1;1;1;1;1	1;1;1;1;1;1	1;1;1;1;1;1	tr|F8WAV4|F8WAV4_HUMAN Isoform of Q8IZS8, Voltage-dependent calcium channel subunit alpha-2/delta-3 OS=Homo sapiens OX=9606 GN=CACNA2D3 PE=1 SV=1;tr|C9JAV5|C9JAV5_HUMAN Isoform of Q8IZS8, Voltage-dependent calcium channel subunit alpha-2/delta-3 (Fragment)	6	1	1	1	1	0	0	0	1	0	0	0	1	0	0	0	23.9	23.9	23.9	5.314	46	46;126;525;519;997;1091	0.0048616	1.8006	0.92691	0.85295	NaN	1	0	Median	0.92691	NaN	NaN	NaN	0.85295	NaN	NaN	NaN
ST14	Suppressor of tumorigenicity 14 protein	0.85906	NaN	NaN	NaN	Q9Y5Y6	Q9Y5Y6	1	1	1	sp|Q9Y5Y6|ST14_HUMAN Suppressor of tumorigenicity 14 protein OS=Homo sapiens OX=9606 GN=ST14 PE=1 SV=2	1	1	1	1	1	0	0	0	1	0	0	0	1	0	0	0	1.6	1.6	1.6	94.769	855	855	0.0048598	1.7976	0.88441	0.85906	NaN	1	0	Median	0.88441	NaN	NaN	NaN	0.85906	NaN	NaN	NaN
IDH1	Isocitrate dehydrogenase [NADP] cytoplasmic	0.86573	NaN	0.76794	NaN	O75874;C9J4N6;P48735-2;P48735	O75874	5;1;1;1	5;1;1;1	5;1;1;1	sp|O75874|IDHC_HUMAN Isocitrate dehydrogenase [NADP] cytoplasmic OS=Homo sapiens OX=9606 GN=IDH1 PE=1 SV=2	4	5	5	5	5	0	2	0	5	0	2	0	5	0	2	0	14	14	14	46.659	414	414;157;400;452	0	6.9176	0.86108	0.88519	10.775	7	3	Leave out requantified	0.92006	NaN	0.57101	NaN	0.86573	NaN	0.76794	NaN
CEP170	Centrosomal protein of 170 kDa	0.86819	NaN	1.1304	NaN	H0Y2V6;Q5SW79-2;Q5SW79-3;Q5SW79;E5RGW7;E5RG47;H0Y4T4;E7EWM2;E7EMW0;Q96L14	H0Y2V6;Q5SW79-2;Q5SW79-3;Q5SW79	3;3;3;3;1;1;1;1;1;1	3;3;3;3;1;1;1;1;1;1	3;3;3;3;1;1;1;1;1;1	tr|H0Y2V6|H0Y2V6_HUMAN Isoform of Q5SW79, Centrosomal protein of 170 kDa (Fragment) OS=Homo sapiens OX=9606 GN=CEP170 PE=1 SV=1;sp|Q5SW79-2|CE170-2_HUMAN Isoform of Q5SW79, Isoform 2 of Centrosomal protein of 170 kDa OS=Homo sapiens OX=9606 GN=CEP170 PE=1	10	3	3	3	2	0	1	0	2	0	1	0	2	0	1	0	2.4	2.4	2.4	171.97	1558	1558;1460;1486;1584;103;175;263;293;320;293	0.00044563	3.3955	0.81147	0.99067	18.664	2	1	Median	0.91087	NaN	0.72291	NaN	0.86819	NaN	1.1304	NaN
DYNLRB2;DYNLRB1	Dynein light chain roadblock-type 1;Dynein light chain roadblock-type 2	0.86874	NaN	0.94524	NaN	H3BQI1;B1AKR6;Q9NP97;Q8TF09	H3BQI1;B1AKR6;Q9NP97;Q8TF09	1;1;1;1	1;1;1;1	1;1;1;1	tr|H3BQI1|H3BQI1_HUMAN Isoform of Q8TF09, Dynein light chain roadblock-type 2 OS=Homo sapiens OX=9606 GN=DYNLRB2 PE=1 SV=1;tr|B1AKR6|B1AKR6_HUMAN Isoform of Q9NP97, Dynein light chain roadblock-type 1 OS=Homo sapiens OX=9606 GN=DYNLRB1 PE=1 SV=1;sp|Q9NP97|	4	1	1	1	1	0	1	0	1	0	1	0	1	0	1	0	9.6	9.6	9.6	13.852	125	125;148;96;96	0.00081433	2.4273	0.71498	0.90618	5.9675	2	0	Median	0.88442	NaN	0.578	NaN	0.86874	NaN	0.94524	NaN
		0.87524	NaN	0.66583	NaN	REV__Q7Z5L2-2;REV__A0A384DVK4;REV__Q7Z5L2;REV__A0A087X0M0	REV__Q7Z5L2-2;REV__A0A384DVK4;REV__Q7Z5L2;REV__A0A087X0M0	1;1;1;1	1;1;1;1	1;1;1;1	sp|Q7Z5L2-2|R3HCL-2_HUMAN Isoform of Q7Z5L2, Isoform 2 of Coiled-coil domain-containing protein R3HCC1L OS=Homo sapiens OX=9606 GN=R3HCC1L PE=1 SV=3;tr|A0A384DVK4|A0A384DVK4_HUMAN Isoform of Q7Z5L2, Coiled-coil domain-containing protein R3HCC1L OS=Homo sap	4	1	1	1	1	0	1	0	1	0	1	0	1	0	1	0	0	0	0	86.292	778	778;778;792;792	1	-2	0.90526	0.87524	47.489	3	0	Plateau	0.90526	NaN	0.39787	NaN	0.87524	NaN	0.66583	NaN
NFKB1	Nuclear factor NF-kappa-B p105 subunit;Nuclear factor NF-kappa-B p50 subunit	0.88289	NaN	0.84105	NaN	P19838-3;P19838;P19838-2;D6RF93;A0A494C157;A0A494C1E9	P19838-3;P19838;P19838-2;D6RF93;A0A494C157;A0A494C1E9	2;2;2;1;1;1	2;2;2;1;1;1	2;2;2;1;1;1	sp|P19838-3|NFKB1-3_HUMAN Isoform of P19838, Isoform 3 of Nuclear factor NF-kappa-B p105 subunit OS=Homo sapiens OX=9606 GN=NFKB1 PE=1 SV=2;sp|P19838|NFKB1_HUMAN Nuclear factor NF-kappa-B p105 subunit OS=Homo sapiens OX=9606 GN=NFKB1 PE=1 SV=2;sp|P19838-2|	6	2	2	2	1	0	1	0	1	0	1	0	1	0	1	0	3.6	3.6	3.6	85.519	788	788;968;969;196;253;511	0.0066543	1.6886	0.72182	0.86172	3.4328	2	1	Median	0.92202	NaN	0.56509	NaN	0.88289	NaN	0.84105	NaN
KMT2A	Histone-lysine N-methyltransferase 2A;MLL cleavage product N320;MLL cleavage product C180	0.88792	NaN	NaN	NaN	Q03164-2;Q03164;Q03164-3	Q03164-2;Q03164;Q03164-3	2;2;2	2;2;2	2;2;2	sp|Q03164-2|KMT2A-2_HUMAN Isoform of Q03164, Isoform 2 of Histone-lysine N-methyltransferase 2A OS=Homo sapiens OX=9606 GN=KMT2A PE=1 SV=5;sp|Q03164|KMT2A_HUMAN Histone-lysine N-methyltransferase 2A OS=Homo sapiens OX=9606 GN=KMT2A PE=1 SV=5;sp|Q03164-3|KM	3	2	2	2	2	0	0	0	2	0	0	0	2	0	0	0	0.7	0.7	0.7	427.73	3931	3931;3969;3972	0	36.63	0.8962	0.88792	NaN	1	0	Median	0.8962	NaN	NaN	NaN	0.88792	NaN	NaN	NaN
NSFL1C	NSFL1 cofactor p47	0.88844	NaN	6.4178	NaN	Q9UNZ2-4;Q9UNZ2;Q9UNZ2-5;F2Z2K0;Q9UNZ2-6	Q9UNZ2-4;Q9UNZ2;Q9UNZ2-5;F2Z2K0;Q9UNZ2-6	2;2;2;1;1	2;2;2;1;1	2;2;2;1;1	sp|Q9UNZ2-4|NSF1C-4_HUMAN Isoform of Q9UNZ2, Isoform 2 of NSFL1 cofactor p47 OS=Homo sapiens OX=9606 GN=NSFL1C PE=1 SV=2;sp|Q9UNZ2|NSF1C_HUMAN NSFL1 cofactor p47 OS=Homo sapiens OX=9606 GN=NSFL1C PE=1 SV=2;sp|Q9UNZ2-5|NSF1C-5_HUMAN Isoform of Q9UNZ2, Isofo	5	2	2	2	2	0	2	0	2	0	2	0	2	0	2	0	6.8	6.8	6.8	37.325	339	339;370;372;274;259	0	4.8344	1.2587	18.019	165.5	4	2	Linear	0.94385	NaN	4.4341	NaN	0.88844	NaN	6.4178	NaN
FDPS	Farnesyl pyrophosphate synthase	0.8896	NaN	1.2285	NaN	A0A087X1D8;A0A087WVN4;P14324-2;P14324;A0A087WTP2	A0A087X1D8;A0A087WVN4;P14324-2;P14324;A0A087WTP2	2;2;2;2;1	2;2;2;2;1	2;2;2;2;1	tr|A0A087X1D8|A0A087X1D8_HUMAN Isoform of P14324, Farnesyl pyrophosphate synthase (Fragment) OS=Homo sapiens OX=9606 GN=FDPS PE=1 SV=1;tr|A0A087WVN4|A0A087WVN4_HUMAN Isoform of P14324, Farnesyl pyrophosphate synthase (Fragment) OS=Homo sapiens OX=9606 GN=F	5	2	2	2	1	0	2	0	1	0	2	0	1	0	2	0	17.8	17.8	17.8	20.033	174	174;274;353;419;80	0.00042955	2.9585	0.78968	1.313	21.414	3	0	Plateau	0.89502	NaN	0.76548	NaN	0.8896	NaN	1.2285	NaN
CSNK1E	Casein kinase I isoform epsilon	0.89811	NaN	NaN	NaN	P49674;H0Y5S9;H0Y682	P49674	4;1;1	1;1;1	1;1;1	sp|P49674|KC1E_HUMAN Casein kinase I isoform epsilon OS=Homo sapiens OX=9606 GN=CSNK1E PE=1 SV=1	3	4	1	1	3	3	1	3	1	0	0	0	1	0	0	0	11.8	3.1	3.1	47.315	416	416;119;144	1	-2	0.94391	0.89811	NaN	1	0	Median	0.94391	NaN	NaN	NaN	0.89811	NaN	NaN	NaN
RNF20	E3 ubiquitin-protein ligase BRE1A	0.90062	NaN	0.69376	NaN	Q5VTR2;C9J0A5;C9JXC9	Q5VTR2	4;1;1	3;1;1	3;1;1	sp|Q5VTR2|BRE1A_HUMAN E3 ubiquitin-protein ligase BRE1A OS=Homo sapiens OX=9606 GN=RNF20 PE=1 SV=2	3	4	3	3	3	1	3	1	2	0	2	0	2	0	2	0	5.2	3.8	3.8	113.66	975	975;145;181	0	6.1557	0.77672	0.71143	29.543	4	1	Leave out requantified	0.98635	NaN	0.50277	NaN	0.90062	NaN	0.69376	NaN
MED20	Mediator of RNA polymerase II transcription subunit 20	0.90304	NaN	0.81443	NaN	A6PVP4;B7ZBQ3;Q9H944-2;Q9H944;B7ZBQ1	A6PVP4;B7ZBQ3;Q9H944-2;Q9H944;B7ZBQ1	2;2;2;2;1	2;2;2;2;1	2;2;2;2;1	tr|A6PVP4|A6PVP4_HUMAN Isoform of Q9H944, Mediator of RNA polymerase II transcription subunit 20 (Fragment) OS=Homo sapiens OX=9606 GN=MED20 PE=1 SV=1;tr|B7ZBQ3|B7ZBQ3_HUMAN Isoform of Q9H944, Mediator of RNA polymerase II transcription subunit 20 OS=Homo	5	2	2	2	1	1	1	0	1	1	1	0	1	1	1	0	26.4	26.4	26.4	15.327	140	140;145;123;212;60	0	4.028	0.66277	0.85759	7.3029	2	0	Median	0.91129	NaN	0.48203	NaN	0.90304	NaN	0.81443	NaN
RBM23	Probable RNA-binding protein 23	0.90639	NaN	0.59432	NaN	G3V546;G3XAP0;Q86U06-3;Q86U06-4;Q86U06-5;Q86U06-2;Q86U06	G3V546;G3XAP0;Q86U06-3;Q86U06-4;Q86U06-5;Q86U06-2;Q86U06	1;1;1;1;1;1;1	1;1;1;1;1;1;1	1;1;1;1;1;1;1	tr|G3V546|G3V546_HUMAN Isoform of Q86U06, Probable RNA-binding protein 23 (Fragment) OS=Homo sapiens OX=9606 GN=RBM23 PE=1 SV=8;tr|G3XAP0|G3XAP0_HUMAN Isoform of Q86U06, Probable RNA-binding protein 23 OS=Homo sapiens OX=9606 GN=RBM23 PE=1 SV=1;sp|Q86U06-3	7	1	1	1	1	0	1	0	1	0	1	0	1	0	1	0	13.2	13.2	13.2	12.687	114	114;269;319;405;417;423;439	0.0073126	1.6216	0.6646	0.73395	29.843	2	1	Median	0.96464	NaN	0.45789	NaN	0.90639	NaN	0.59432	NaN
BAG5	BAG family molecular chaperone regulator 5	0.9075	NaN	0.90556	NaN	Q9UL15-2;Q9UL15;G3V274	Q9UL15-2;Q9UL15	4;4;1	4;4;1	4;4;1	sp|Q9UL15-2|BAG5-2_HUMAN Isoform of Q9UL15, Isoform 2 of BAG family molecular chaperone regulator 5 OS=Homo sapiens OX=9606 GN=BAG5 PE=1 SV=1;sp|Q9UL15|BAG5_HUMAN BAG family molecular chaperone regulator 5 OS=Homo sapiens OX=9606 GN=BAG5 PE=1 SV=1	3	4	4	4	3	0	1	0	3	0	1	0	3	0	1	0	11.9	11.9	11.9	56.026	488	488;447;211	0	5.7363	0.92012	0.9075	0.54291	4	1	Leave out requantified	0.93985	NaN	0.75127	NaN	0.9075	NaN	0.90556	NaN
MYO5A	Unconventional myosin-Va	0.90863	NaN	NaN	NaN	A0A087WY00;G3V394;F8WE88;F8W6H6;Q9Y4I1-2;Q9Y4I1;Q9Y4I1-3	A0A087WY00;G3V394;F8WE88;F8W6H6;Q9Y4I1-2;Q9Y4I1;Q9Y4I1-3	3;3;3;3;3;3;3	3;3;3;3;3;3;3	2;2;2;2;2;2;2	tr|A0A087WY00|A0A087WY00_HUMAN Isoform of Q9Y4I1, Unconventional myosin-Va OS=Homo sapiens OX=9606 GN=MYO5A PE=1 SV=1;tr|G3V394|G3V394_HUMAN Isoform of Q9Y4I1, Unconventional myosin-Va OS=Homo sapiens OX=9606 GN=MYO5A PE=1 SV=1;tr|F8WE88|F8WE88_HUMAN Isofo	7	3	3	2	2	0	1	0	2	0	1	0	1	0	1	0	2.5	2.5	1.7	212.2	1828	1828;1853;1855;1855;1828;1855;1880	0	4.5161	0.98771	0.90863	NaN	1	0	Median	0.98771	NaN	NaN	NaN	0.90863	NaN	NaN	NaN
MMS22L	Protein MMS22-like	0.90974	NaN	NaN	NaN	E2QRD4;Q6ZRQ5	E2QRD4;Q6ZRQ5	1;1	1;1	1;1	tr|E2QRD4|E2QRD4_HUMAN Isoform of Q6ZRQ5, Protein MMS22-like OS=Homo sapiens OX=9606 GN=MMS22L PE=1 SV=1;sp|Q6ZRQ5|MMS22_HUMAN Protein MMS22-like OS=Homo sapiens OX=9606 GN=MMS22L PE=1 SV=3	2	1	1	1	1	0	0	0	1	0	0	0	1	0	0	0	0.9	0.9	0.9	137.5	1203	1203;1243	0.0073046	1.6205	0.94653	0.90974	NaN	1	0	Median	0.94653	NaN	NaN	NaN	0.90974	NaN	NaN	NaN
SMARCA2	Probable global transcription activator SNF2L2	0.91145	NaN	NaN	NaN	P51531-2;P51531;F6VDE0;A0A0U1RQZ9	P51531-2;P51531;F6VDE0;A0A0U1RQZ9	13;13;12;10	1;1;1;1	1;1;1;1	sp|P51531-2|SMCA2-2_HUMAN Isoform of P51531, Isoform Short of Probable global transcription activator SNF2L2 OS=Homo sapiens OX=9606 GN=SMARCA2 PE=1 SV=2;sp|P51531|SMCA2_HUMAN Probable global transcription activator SNF2L2 OS=Homo sapiens OX=9606 GN=SMARCA	4	13	1	1	11	7	9	7	1	0	0	0	1	0	0	0	8.6	0.8	0.8	179.28	1572	1572;1590;1514;1428	1	-2	0.96659	0.91145	NaN	1	0	Median	0.96659	NaN	NaN	NaN	0.91145	NaN	NaN	NaN
HOOK1	Protein Hook homolog 1	0.9146	NaN	NaN	NaN	Q9UJC3-2;Q9UJC3	Q9UJC3-2;Q9UJC3	2;2	2;2	2;2	sp|Q9UJC3-2|HOOK1-2_HUMAN Isoform of Q9UJC3, Isoform 2 of Protein Hook homolog 1 OS=Homo sapiens OX=9606 GN=HOOK1 PE=1 SV=2;sp|Q9UJC3|HOOK1_HUMAN Protein Hook homolog 1 OS=Homo sapiens OX=9606 GN=HOOK1 PE=1 SV=2	2	2	2	2	2	0	0	0	2	0	0	0	2	0	0	0	3.1	3.1	3.1	80.021	686	686;728	0.00082305	2.5131	0.98663	0.9146	2.1059	2	0	Median	0.98663	NaN	NaN	NaN	0.9146	NaN	NaN	NaN
ATRN	Attractin	0.92059	NaN	NaN	NaN	O75882	O75882	1	1	1	sp|O75882|ATRN_HUMAN Attractin OS=Homo sapiens OX=9606 GN=ATRN PE=1 SV=2	1	1	1	1	1	0	0	0	1	0	0	0	1	0	0	0	0.8	0.8	0.8	158.54	1429	1429	0.0073692	1.6553	1.0062	0.92059	NaN	1	0	Median	1.0062	NaN	NaN	NaN	0.92059	NaN	NaN	NaN
TOP3A	DNA topoisomerase 3-alpha	0.9235	NaN	NaN	NaN	Q13472-3;Q13472-2;Q13472	Q13472-3;Q13472-2;Q13472	1;1;1	1;1;1	1;1;1	sp|Q13472-3|TOP3A-3_HUMAN Isoform of Q13472, Isoform 3 of DNA topoisomerase 3-alpha OS=Homo sapiens OX=9606 GN=TOP3A PE=1 SV=1;sp|Q13472-2|TOP3A-2_HUMAN Isoform of Q13472, Isoform Short of DNA topoisomerase 3-alpha OS=Homo sapiens OX=9606 GN=TOP3A PE=1 SV=	3	1	1	1	1	0	0	0	1	0	0	0	1	0	0	0	1.5	1.5	1.5	101.21	906	906;976;1001	0.0038212	1.9612	0.97866	0.9235	NaN	1	0	Median	0.97866	NaN	NaN	NaN	0.9235	NaN	NaN	NaN
FAM9B		0.93662	NaN	NaN	NaN	E9PL73	E9PL73	1	1	1	tr|E9PL73|E9PL73_HUMAN Isoform of Q8IZU0, Protein FAM9B OS=Homo sapiens OX=9606 GN=FAM9B PE=4 SV=1	1	1	1	1	1	0	0	0	1	0	0	0	1	0	0	0	13.3	13.3	13.3	10.373	90	90	0.0019654	2.1653	0.94588	0.93662	NaN	1	0	Median	0.94588	NaN	NaN	NaN	0.93662	NaN	NaN	NaN
LTA4H	Leukotriene A-4 hydrolase	0.94185	NaN	1.3099	NaN	P09960-3;P09960-2;P09960-4;P09960	P09960-3;P09960-2;P09960-4;P09960	3;3;3;3	3;3;3;3	3;3;3;3	sp|P09960-3|LKHA4-3_HUMAN Isoform of P09960, Isoform 3 of Leukotriene A-4 hydrolase OS=Homo sapiens OX=9606 GN=LTA4H PE=1 SV=2;sp|P09960-2|LKHA4-2_HUMAN Isoform of P09960, Isoform 2 of Leukotriene A-4 hydrolase OS=Homo sapiens OX=9606 GN=LTA4H PE=1 SV=2;sp	4	3	3	3	1	0	3	0	1	0	3	0	1	0	3	0	6.1	6.1	6.1	57.299	508	508;532;587;611	0	4.2017	0.94413	1.3099	13.705	4	0	Leave out requantified	1.0422	NaN	0.86518	NaN	0.94185	NaN	1.3099	NaN
MYDGF	Myeloid-derived growth factor	0.94256	NaN	1.0472	NaN	M0QXF7;M0QYN0;Q969H8	M0QXF7;M0QYN0;Q969H8	1;1;1	1;1;1	1;1;1	tr|M0QXF7|M0QXF7_HUMAN Isoform of Q969H8, Myeloid-derived growth factor (Fragment) OS=Homo sapiens OX=9606 GN=MYDGF PE=1 SV=1;tr|M0QYN0|M0QYN0_HUMAN Isoform of Q969H8, Myeloid-derived growth factor OS=Homo sapiens OX=9606 GN=MYDGF PE=1 SV=1;sp|Q969H8|MYDGF	3	1	1	1	1	0	1	0	1	0	1	0	1	0	1	0	17.9	17.9	17.9	9.5594	84	84;189;173	0.0019968	2.2979	0.88564	0.99348	7.4416	2	0	Median	0.94145	NaN	0.83314	NaN	0.94256	NaN	1.0472	NaN
MAPK1IP1L	MAPK-interacting and spindle-stabilizing protein-like	0.94331	NaN	NaN	NaN	Q8NDC0	Q8NDC0	1	1	1	sp|Q8NDC0|MISSL_HUMAN MAPK-interacting and spindle-stabilizing protein-like OS=Homo sapiens OX=9606 GN=MAPK1IP1L PE=1 SV=4	1	1	1	1	1	0	0	0	1	0	0	0	1	0	0	0	6.9	6.9	6.9	24.269	245	245	0.009922	1.445	1	0.94331	NaN	1	1	Median	1	NaN	NaN	NaN	0.94331	NaN	NaN	NaN
AP2A2	AP-2 complex subunit alpha-2	0.94396	NaN	0.8818	NaN	O94973;O94973-2;A0A0G2JS82;O94973-3;A0A0G2JQM1	O94973;O94973-2;A0A0G2JS82;O94973-3;A0A0G2JQM1	9;9;8;7;6	3;3;3;1;1	3;3;3;1;1	sp|O94973|AP2A2_HUMAN AP-2 complex subunit alpha-2 OS=Homo sapiens OX=9606 GN=AP2A2 PE=1 SV=2;sp|O94973-2|AP2A2-2_HUMAN Isoform of O94973, Isoform 2 of AP-2 complex subunit alpha-2 OS=Homo sapiens OX=9606 GN=AP2A2 PE=1 SV=2;tr|A0A0G2JS82|A0A0G2JS82_HUMAN I	5	9	3	3	5	1	7	1	2	0	2	0	2	0	2	0	12.9	5.3	5.3	103.96	939	939;940;917;656;634	0	7.7657	0.76672	0.91235	4.8171	2	1	Median	1.0182	NaN	0.57734	NaN	0.94396	NaN	0.8818	NaN
VAT1	Synaptic vesicle membrane protein VAT-1 homolog	0.94444	NaN	0.62096	NaN	Q99536;K7ERT7;K7ER81;K7ENX2;K7EM19;Q99536-2;Q99536-3	Q99536;K7ERT7	3;2;1;1;1;1;1	3;2;1;1;1;1;1	3;2;1;1;1;1;1	sp|Q99536|VAT1_HUMAN Synaptic vesicle membrane protein VAT-1 homolog OS=Homo sapiens OX=9606 GN=VAT1 PE=1 SV=2;tr|K7ERT7|K7ERT7_HUMAN Isoform of Q99536, Synaptic vesicle membrane protein VAT-1 homolog (Fragment) OS=Homo sapiens OX=9606 GN=VAT1 PE=1 SV=1	7	3	3	3	2	0	1	0	2	0	1	0	2	0	1	0	10.7	10.7	10.7	41.92	393	393;146;92;151;154;259;325	0	4.1013	0.96286	0.90482	24.587	3	0	Leave out requantified	1.0184	NaN	0.50604	NaN	0.94444	NaN	0.62096	NaN
PRKCQ	Protein kinase C	0.9521	NaN	NaN	NaN	A0A087X0I9	A0A087X0I9	1	1	1	tr|A0A087X0I9|A0A087X0I9_HUMAN Isoform of Q04759, Protein kinase C OS=Homo sapiens OX=9606 GN=PRKCQ PE=1 SV=1	1	1	1	1	1	0	0	0	1	0	0	0	1	0	0	0	1.8	1.8	1.8	77.969	670	670	1	-2	1.0552	0.9521	NaN	1	0	Median	1.0552	NaN	NaN	NaN	0.9521	NaN	NaN	NaN
UBR1	E3 ubiquitin-protein ligase UBR1	0.95421	NaN	1.1378	NaN	Q8IWV7;A0A087WTJ9;Q8IWV7-2	Q8IWV7;A0A087WTJ9;Q8IWV7-2	2;1;1	2;1;1	2;1;1	sp|Q8IWV7|UBR1_HUMAN E3 ubiquitin-protein ligase UBR1 OS=Homo sapiens OX=9606 GN=UBR1 PE=1 SV=1;tr|A0A087WTJ9|A0A087WTJ9_HUMAN Isoform of Q8IWV7, E3 ubiquitin-protein ligase UBR1 OS=Homo sapiens OX=9606 GN=UBR1 PE=1 SV=1;sp|Q8IWV7-2|UBR1-2_HUMAN Isoform of	3	2	2	2	1	0	1	0	1	0	1	0	1	0	1	0	1.4	1.4	1.4	200.21	1749	1749;1070;803	0.0055866	1.7774	0.88831	1.042	12.444	2	0	Median	1.0198	NaN	0.77378	NaN	0.95421	NaN	1.1378	NaN
NAE1	NEDD8-activating enzyme E1 regulatory subunit	0.95704	NaN	1.7272	NaN	Q13564-3;Q13564-2;Q13564;Q13564-4	Q13564-3;Q13564-2;Q13564;Q13564-4	2;2;2;2	2;2;2;2	2;2;2;2	sp|Q13564-3|ULA1-3_HUMAN Isoform of Q13564, Isoform 3 of NEDD8-activating enzyme E1 regulatory subunit OS=Homo sapiens OX=9606 GN=NAE1 PE=1 SV=1;sp|Q13564-2|ULA1-2_HUMAN Isoform of Q13564, Isoform 2 of NEDD8-activating enzyme E1 regulatory subunit OS=Homo	4	2	2	2	2	0	1	0	2	0	1	0	2	0	1	0	5.6	5.6	5.6	50.624	445	445;528;534;537	0	5.3366	1.1727	1.3676	36.254	3	0	Plateau	1.0612	NaN	1.1727	NaN	0.95704	NaN	1.7272	NaN
SNRPC	U1 small nuclear ribonucleoprotein C	0.9629	NaN	NaN	NaN	A0A0A0MRR7;P09234	A0A0A0MRR7;P09234	1;1	1;1	1;1	tr|A0A0A0MRR7|A0A0A0MRR7_HUMAN Isoform of P09234, U1 small nuclear ribonucleoprotein C OS=Homo sapiens OX=9606 GN=SNRPC PE=1 SV=1;sp|P09234|RU1C_HUMAN U1 small nuclear ribonucleoprotein C OS=Homo sapiens OX=9606 GN=SNRPC PE=1 SV=1	2	1	1	1	1	0	0	0	1	0	0	0	1	0	0	0	6.7	6.7	6.7	19.687	180	180;159	0.004858	1.7974	0.99204	0.9629	NaN	1	0	Median	0.99204	NaN	NaN	NaN	0.9629	NaN	NaN	NaN
NKIRAS2	NF-kappa-B inhibitor-interacting Ras-like protein 2	0.96304	NaN	1.1568	NaN	K7ERG2;H7BXP1;Q9NYR9-3;Q9NYR9-2;Q9NYR9	K7ERG2;H7BXP1;Q9NYR9-3;Q9NYR9-2;Q9NYR9	1;1;1;1;1	1;1;1;1;1	1;1;1;1;1	tr|K7ERG2|K7ERG2_HUMAN Isoform of Q9NYR9, NF-kappa-B inhibitor-interacting Ras-like protein 2 (Fragment) OS=Homo sapiens OX=9606 GN=NKIRAS2 PE=1 SV=8;tr|H7BXP1|H7BXP1_HUMAN Isoform of Q9NYR9, NF-kappa-B inhibitor-interacting Ras-like protein 2 OS=Homo sapi	5	1	1	1	1	0	1	0	1	0	1	0	1	0	1	0	8.6	8.6	8.6	16.301	140	140;229;135;189;191	0.0041509	1.8779	0.88901	1.0555	12.961	2	0	Median	0.98631	NaN	0.80132	NaN	0.96304	NaN	1.1568	NaN
KDM3B	Lysine-specific demethylase 3B	0.96372	NaN	0.96805	NaN	Q7LBC6;Q7LBC6-2;Q7LBC6-3	Q7LBC6;Q7LBC6-2	4;4;1	4;4;1	4;4;1	sp|Q7LBC6|KDM3B_HUMAN Lysine-specific demethylase 3B OS=Homo sapiens OX=9606 GN=KDM3B PE=1 SV=2;sp|Q7LBC6-2|KDM3B-2_HUMAN Isoform of Q7LBC6, Isoform 2 of Lysine-specific demethylase 3B OS=Homo sapiens OX=9606 GN=KDM3B PE=1 SV=2	3	4	4	4	3	0	2	0	3	0	2	0	3	0	2	0	3.9	3.9	3.9	191.58	1761	1761;1417;759	0	7.3785	1.0222	0.96372	48.598	4	2	Median	1.0222	NaN	0.68765	NaN	0.96372	NaN	0.96805	NaN
ILKAP2;ILKAP;ILKAP3	Integrin-linked kinase-associated serine/threonine phosphatase 2C	0.96529	NaN	0.97462	NaN	F8SNU6;Q9H0C8;E9PC05;F8SNU7	F8SNU6;Q9H0C8;E9PC05;F8SNU7	2;2;1;1	2;2;1;1	2;2;1;1	tr|F8SNU6|F8SNU6_HUMAN Isoform of Q9H0C8, Integrin-linked kinase associated phosphatase OS=Homo sapiens OX=9606 GN=ILKAP PE=1 SV=1;sp|Q9H0C8|ILKAP_HUMAN Integrin-linked kinase-associated serine/threonine phosphatase 2C OS=Homo sapiens OX=9606 GN=ILKAP PE=1	4	2	2	2	2	0	1	1	2	0	1	1	2	0	1	1	13	13	13	17.619	162	162;392;212;274	0.0079768	1.5772	0.92428	0.96994	0.68049	2	0	Median	1.0525	NaN	0.81172	NaN	0.96529	NaN	0.97462	NaN
ACAT1	Acetyl-CoA acetyltransferase, mitochondrial	0.96595	NaN	1.1775	NaN	P24752;H0YEL7;P24752-2;E9PKF3;E9PRQ6	P24752;H0YEL7;P24752-2	4;2;2;1;1	4;2;2;1;1	4;2;2;1;1	sp|P24752|THIL_HUMAN Acetyl-CoA acetyltransferase, mitochondrial OS=Homo sapiens OX=9606 GN=ACAT1 PE=1 SV=1;tr|H0YEL7|H0YEL7_HUMAN Isoform of P24752, Acetyl-CoA acetyltransferase, mitochondrial (Fragment) OS=Homo sapiens OX=9606 GN=ACAT1 PE=1 SV=1;sp|P2475	5	4	4	4	4	0	1	0	4	0	1	0	4	0	1	0	13.3	13.3	13.3	45.199	427	427;136;162;54;141	0	17.198	1.0541	1.0524	40.327	5	0	Leave out requantified	1.0541	NaN	0.72014	NaN	0.96595	NaN	1.1775	NaN
ARL3	ADP-ribosylation factor-like protein 3	0.97324	NaN	1.387	NaN	P36405	P36405	2	2	2	sp|P36405|ARL3_HUMAN ADP-ribosylation factor-like protein 3 OS=Homo sapiens OX=9606 GN=ARL3 PE=1 SV=2	1	2	2	2	1	0	2	0	1	0	2	0	1	0	2	0	16.5	16.5	16.5	20.455	182	182	0	4.3864	0.86625	1.309	21.258	3	0	Median	0.99724	NaN	0.81153	NaN	0.97324	NaN	1.387	NaN
RAD23B	UV excision repair protein RAD23 homolog B	0.97413	NaN	0.84685	NaN	P54727;P54727-2;H0Y579	P54727;P54727-2;H0Y579	2;2;1	2;2;1	2;2;1	sp|P54727|RD23B_HUMAN UV excision repair protein RAD23 homolog B OS=Homo sapiens OX=9606 GN=RAD23B PE=1 SV=1;sp|P54727-2|RD23B-2_HUMAN Isoform of P54727, Isoform 2 of UV excision repair protein RAD23 homolog B OS=Homo sapiens OX=9606 GN=RAD23B PE=1 SV=1;tr	3	2	2	2	2	0	1	0	2	0	1	0	2	0	1	0	10.3	10.3	10.3	43.171	409	409;337;114	0	9.8109	0.88892	0.88069	4.3601	4	0	Leave out requantified	0.96443	NaN	0.73377	NaN	0.97413	NaN	0.84685	NaN
ME2	NAD-dependent malic enzyme, mitochondrial	0.97511	NaN	1.1383	NaN	A0A1W2PR68;A0A1W2PQT3;A0A1W2PPH1;A0A1W2PQH3;A0A1W2PQY8;P23368;A0A1W2PQ37;A0A1W2PQF8;P23368-2	A0A1W2PR68;A0A1W2PQT3;A0A1W2PPH1;A0A1W2PQH3;A0A1W2PQY8;P23368;A0A1W2PQ37;A0A1W2PQF8;P23368-2	2;2;2;2;2;2;1;1;1	2;2;2;2;2;2;1;1;1	2;2;2;2;2;2;1;1;1	tr|A0A1W2PR68|A0A1W2PR68_HUMAN Isoform of P23368, Malic enzyme OS=Homo sapiens OX=9606 GN=ME2 PE=1 SV=1;tr|A0A1W2PQT3|A0A1W2PQT3_HUMAN Isoform of P23368, Malic enzyme OS=Homo sapiens OX=9606 GN=ME2 PE=1 SV=1;tr|A0A1W2PPH1|A0A1W2PPH1_HUMAN Isoform of P23368	9	2	2	2	2	0	2	0	2	0	2	0	2	0	2	0	5.8	5.8	5.8	59.897	530	530;536;546;547;565;584;443;480;479	0	11.915	0.94049	0.97511	22.271	3	0	Median	1.0735	NaN	0.76238	NaN	0.97511	NaN	1.1383	NaN
KIF21A	Kinesin-like protein KIF21A	0.98143	NaN	NaN	NaN	H0YHT2;A0A1B0GV47;Q7Z4S6-6;Q7Z4S6-3;Q7Z4S6-5;Q7Z4S6-2;Q7Z4S6;Q7Z4S6-4;H0YIM6	H0YHT2;A0A1B0GV47;Q7Z4S6-6;Q7Z4S6-3;Q7Z4S6-5;Q7Z4S6-2;Q7Z4S6;Q7Z4S6-4;H0YIM6	2;2;2;2;2;2;2;2;1	2;2;2;2;2;2;2;2;1	2;2;2;2;2;2;2;2;1	tr|H0YHT2|H0YHT2_HUMAN Isoform of Q7Z4S6, Kinesin-like protein KIF21A (Fragment) OS=Homo sapiens OX=9606 GN=KIF21A PE=1 SV=1;tr|A0A1B0GV47|A0A1B0GV47_HUMAN Isoform of Q7Z4S6, Kinesin-like protein KIF21A (Fragment) OS=Homo sapiens OX=9606 GN=KIF21A PE=1 SV=	9	2	2	2	2	0	0	0	2	0	0	0	2	0	0	0	4.3	4.3	4.3	108.75	975	975;1653;1621;1627;1637;1661;1674;1675;475	0	4.9162	0.98992	0.98143	NaN	1	0	Median	0.98992	NaN	NaN	NaN	0.98143	NaN	NaN	NaN
FYTTD1	UAP56-interacting factor	0.98588	NaN	NaN	NaN	H9KVC6;Q96QD9-3;Q96QD9-2;Q96QD9;H9KVC1;Q96QD9-4	H9KVC6;Q96QD9-3;Q96QD9-2;Q96QD9;H9KVC1;Q96QD9-4	2;2;2;2;1;1	2;2;2;2;1;1	2;2;2;2;1;1	tr|H9KVC6|H9KVC6_HUMAN Isoform of Q96QD9, UAP56-interacting factor (Fragment) OS=Homo sapiens OX=9606 GN=FYTTD1 PE=1 SV=8;sp|Q96QD9-3|UIF-3_HUMAN Isoform of Q96QD9, Isoform 3 of UAP56-interacting factor OS=Homo sapiens OX=9606 GN=FYTTD1 PE=1 SV=3;sp|Q96QD9	6	2	2	2	1	0	0	1	1	0	0	1	1	0	0	1	15.9	15.9	15.9	19.849	176	176;251;292;318;71;129	0.0023456	2.1153	1.0815	0.98588	NaN	1	0	Median	1.0815	NaN	NaN	NaN	0.98588	NaN	NaN	NaN
UBE4A	Ubiquitin conjugation factor E4 A	0.98872	NaN	NaN	NaN	Q14139-2;Q14139;B7Z7P0	Q14139-2;Q14139	3;3;1	3;3;1	3;3;1	sp|Q14139-2|UBE4A-2_HUMAN Isoform of Q14139, Isoform 2 of Ubiquitin conjugation factor E4 A OS=Homo sapiens OX=9606 GN=UBE4A PE=1 SV=2;sp|Q14139|UBE4A_HUMAN Ubiquitin conjugation factor E4 A OS=Homo sapiens OX=9606 GN=UBE4A PE=1 SV=2	3	3	3	3	2	0	1	0	2	0	1	0	2	0	1	0	3.7	3.7	3.7	123.52	1073	1073;1066;538	0	4.3692	1.0779	0.98872	6.7796	2	0	Median	1.0779	NaN	NaN	NaN	0.98872	NaN	NaN	NaN
NSF	Vesicle-fusing ATPase	0.98933	NaN	0.93849	NaN	I3L0N3;P46459;P46459-2;I3L0L3	I3L0N3;P46459;P46459-2	4;4;3;1	4;4;3;1	4;4;3;1	tr|I3L0N3|I3L0N3_HUMAN Isoform of P46459, Vesicle-fusing ATPase OS=Homo sapiens OX=9606 GN=NSF PE=1 SV=1;sp|P46459|NSF_HUMAN Vesicle-fusing ATPase OS=Homo sapiens OX=9606 GN=NSF PE=1 SV=3;sp|P46459-2|NSF-2_HUMAN Isoform of P46459, Isoform 2 of Vesicle-fusi	4	4	4	4	3	0	2	0	3	0	2	0	3	0	2	0	7.6	7.6	7.6	82.091	739	739;744;644;161	0	5.5442	0.91602	0.96194	18.734	5	0	Leave out requantified	1.0997	NaN	0.64183	NaN	0.98933	NaN	0.93849	NaN
EXOC7	Exocyst complex component 7	0.99007	NaN	1.2865	NaN	A0A0A0MSB8;Q9UPT5-2;Q9UPT5-5;Q9UPT5-1;Q9UPT5-6;Q9UPT5;B5MCY9;K7ERQ5;A0A0A0MRE1;B4DJ07;Q9UPT5-4;C9JME6;C9JKC2	A0A0A0MSB8;Q9UPT5-2;Q9UPT5-5;Q9UPT5-1;Q9UPT5-6;Q9UPT5;B5MCY9;K7ERQ5;A0A0A0MRE1;B4DJ07;Q9UPT5-4	3;3;3;3;3;3;2;2;2;2;2;1;1	3;3;3;3;3;3;2;2;2;2;2;1;1	3;3;3;3;3;3;2;2;2;2;2;1;1	tr|A0A0A0MSB8|A0A0A0MSB8_HUMAN Isoform of Q9UPT5, Exocyst complex component 7 OS=Homo sapiens OX=9606 GN=EXOC7 PE=1 SV=1;sp|Q9UPT5-2|EXOC7-2_HUMAN Isoform of Q9UPT5, Isoform 2 of Exocyst complex component 7 OS=Homo sapiens OX=9606 GN=EXOC7 PE=1 SV=3;sp|Q9U	13	3	3	3	1	0	3	0	1	0	3	0	1	0	3	0	5.9	5.9	5.9	78.808	693	693;653;676;684;707;735;159;168;617;656;283;121;122	0	7.581	1.0088	1.2393	15.574	3	0	Plateau	1.1059	NaN	0.91489	NaN	0.99007	NaN	1.2865	NaN
STAM	Signal transducing adapter molecule 1	0.99167	NaN	0.92605	NaN	C9J1E5;Q92783-2;Q92783	C9J1E5;Q92783-2;Q92783	1;1;1	1;1;1	1;1;1	tr|C9J1E5|C9J1E5_HUMAN Isoform of Q92783, Signal transducing adapter molecule 1 OS=Homo sapiens OX=9606 GN=STAM PE=1 SV=2;sp|Q92783-2|STAM1-2_HUMAN Isoform of Q92783, Isoform 2 of Signal transducing adapter molecule 1 OS=Homo sapiens OX=9606 GN=STAM PE=1 S	3	1	1	1	1	1	1	0	1	1	1	0	1	1	1	0	33.3	33.3	33.3	4.6451	42	42;403;540	0	10.055	0.83941	0.9583	4.8413	2	0	Median	1.1042	NaN	0.63814	NaN	0.99167	NaN	0.92605	NaN
VCPIP1	Deubiquitinating protein VCIP135	0.99442	NaN	1.088	NaN	Q96JH7	Q96JH7	2	2	2	sp|Q96JH7|VCIP1_HUMAN Deubiquitinating protein VCIP135 OS=Homo sapiens OX=9606 GN=VCPIP1 PE=1 SV=2	1	2	2	2	2	0	2	0	2	0	2	0	2	0	2	0	2.8	2.8	2.8	134.32	1222	1222	0	6.8691	0.8956	1.2099	20.288	3	1	Plateau	1.0818	NaN	0.76796	NaN	0.99442	NaN	1.088	NaN
GRSF1	G-rich sequence factor 1	0.99491	NaN	1.0756	NaN	H0Y8R1;F5H5I6;H0YAK1;Q12849-5;Q12849	H0Y8R1;F5H5I6;H0YAK1;Q12849-5;Q12849	2;2;2;2;2	2;2;2;2;2	2;2;2;2;2	tr|H0Y8R1|H0Y8R1_HUMAN Isoform of Q12849, G-rich sequence factor 1 (Fragment) OS=Homo sapiens OX=9606 GN=GRSF1 PE=1 SV=1;tr|F5H5I6|F5H5I6_HUMAN Isoform of Q12849, G-rich sequence factor 1 OS=Homo sapiens OX=9606 GN=GRSF1 PE=1 SV=2;tr|H0YAK1|H0YAK1_HUMAN Is	5	2	2	2	1	0	1	0	1	0	1	0	1	0	1	0	5.5	5.5	5.5	47.27	417	417;424;453;318;480	0	3.4669	0.91193	1.0345	5.517	2	0	Median	1.0861	NaN	0.76571	NaN	0.99491	NaN	1.0756	NaN
DNAJB14	DnaJ homolog subfamily B member 14	0.99593	NaN	NaN	NaN	Q8TBM8-2;Q8TBM8	Q8TBM8-2;Q8TBM8	1;1	1;1	1;1	sp|Q8TBM8-2|DJB14-2_HUMAN Isoform of Q8TBM8, Isoform 2 of DnaJ homolog subfamily B member 14 OS=Homo sapiens OX=9606 GN=DNAJB14 PE=1 SV=1;sp|Q8TBM8|DJB14_HUMAN DnaJ homolog subfamily B member 14 OS=Homo sapiens OX=9606 GN=DNAJB14 PE=1 SV=1	2	1	1	1	1	0	0	0	1	0	0	0	1	0	0	0	3.7	3.7	3.7	33.47	294	294;379	0.0066617	1.6956	1.0537	0.99593	NaN	1	0	Median	1.0537	NaN	NaN	NaN	0.99593	NaN	NaN	NaN
MLST8	Target of rapamycin complex subunit LST8	0.99615	NaN	1.123	NaN	H3BR38;H3BM50;H3BPU5;H3BR25;H3BPT1;H3BN58;H3BSZ4;A0A0A0MR05;Q9BVC4-4;Q9BVC4	H3BR38;H3BM50;H3BPU5;H3BR25;H3BPT1;H3BN58;H3BSZ4;A0A0A0MR05;Q9BVC4-4;Q9BVC4	1;1;1;1;1;1;1;1;1;1	1;1;1;1;1;1;1;1;1;1	1;1;1;1;1;1;1;1;1;1	tr|H3BR38|H3BR38_HUMAN Isoform of Q9BVC4, Target of rapamycin complex subunit LST8 OS=Homo sapiens OX=9606 GN=MLST8 PE=1 SV=1;tr|H3BM50|H3BM50_HUMAN Isoform of Q9BVC4, Target of rapamycin complex subunit LST8 OS=Homo sapiens OX=9606 GN=MLST8 PE=1 SV=1;tr|H	10	1	1	1	1	0	1	0	1	0	1	0	1	0	1	0	25	25	25	7.6896	72	72;116;131;166;198;202;275;327;217;326	0.00084104	2.711	0.84666	1.0577	8.4723	2	0	Median	1.0378	NaN	0.69073	NaN	0.99615	NaN	1.123	NaN
CCDC173	Coiled-coil domain-containing protein 173	0.99846	NaN	NaN	NaN	Q0VFZ6	Q0VFZ6	1	1	1	sp|Q0VFZ6|CC173_HUMAN Coiled-coil domain-containing protein 173 OS=Homo sapiens OX=9606 GN=CCDC173 PE=2 SV=2	1	1	1	1	1	0	0	0	1	0	0	0	1	0	0	0	2.2	2.2	2.2	66.402	552	552	0.0082853	1.5409	1.0061	0.99846	NaN	1	0	Median	1.0061	NaN	NaN	NaN	0.99846	NaN	NaN	NaN
DICER1	Endoribonuclease Dicer	0.99983	NaN	0.9429	NaN	Q9UPY3-2;Q9UPY3;H0YJZ6;Q9UPY3-3	Q9UPY3-2;Q9UPY3	4;4;1;1	4;4;1;1	4;4;1;1	sp|Q9UPY3-2|DICER-2_HUMAN Isoform of Q9UPY3, Isoform 2 of Endoribonuclease Dicer OS=Homo sapiens OX=9606 GN=DICER1 PE=1 SV=3;sp|Q9UPY3|DICER_HUMAN Endoribonuclease Dicer OS=Homo sapiens OX=9606 GN=DICER1 PE=1 SV=3	4	4	4	4	4	0	1	0	4	0	1	0	4	0	1	0	2.8	2.8	2.8	208.45	1829	1829;1922;394;820	0	8.5781	1.0681	0.99983	12.333	5	0	Leave out requantified	1.0681	NaN	0.60369	NaN	0.99983	NaN	0.9429	NaN
PEBP1	Phosphatidylethanolamine-binding protein 1;Hippocampal cholinergic neurostimulating peptide	0.99988	NaN	1.4042	NaN	P30086	P30086	5	5	5	sp|P30086|PEBP1_HUMAN Phosphatidylethanolamine-binding protein 1 OS=Homo sapiens OX=9606 GN=PEBP1 PE=1 SV=3	1	5	5	5	4	0	3	0	4	0	3	0	4	0	3	0	42.8	42.8	42.8	21.057	187	187	0	114.8	0.89707	1.261	8.8843	7	1	Leave out requantified	1.0257	NaN	0.82067	NaN	0.99988	NaN	1.4042	NaN
APRT	Adenine phosphoribosyltransferase	1.0017	NaN	1.5096	NaN	H3BSW3;H3BQF1;H3BQZ9;P07741-2;P07741;H3BQB1	H3BSW3;H3BQF1;H3BQZ9;P07741-2;P07741;H3BQB1	3;3;3;3;3;2	3;3;3;3;3;2	3;3;3;3;3;2	tr|H3BSW3|H3BSW3_HUMAN Isoform of P07741, Adenine phosphoribosyltransferase OS=Homo sapiens OX=9606 GN=APRT PE=1 SV=1;tr|H3BQF1|H3BQF1_HUMAN Isoform of P07741, Adenine phosphoribosyltransferase (Fragment) OS=Homo sapiens OX=9606 GN=APRT PE=1 SV=8;tr|H3BQZ9	6	3	3	3	2	0	1	0	2	0	1	0	2	0	1	0	50.8	50.8	50.8	6.9189	63	63;148;153;134;180;162	0	3.7206	0.98559	1.0616	24.38	3	0	Leave out requantified	1.0035	NaN	0.98559	NaN	1.0017	NaN	1.5096	NaN
VPS51	Vacuolar protein sorting-associated protein 51 homolog	1.0029	NaN	0.7902	NaN	H0YEE1;Q9UID3-2;Q9UID3;H0YDX9;H0YCB7	H0YEE1;Q9UID3-2;Q9UID3;H0YDX9;H0YCB7	2;2;2;1;1	2;2;2;1;1	2;2;2;1;1	tr|H0YEE1|H0YEE1_HUMAN Isoform of Q9UID3, Vacuolar protein sorting-associated protein 51 homolog (Fragment) OS=Homo sapiens OX=9606 GN=VPS51 PE=1 SV=1;sp|Q9UID3-2|VPS51-2_HUMAN Isoform of Q9UID3, Isoform 2 of Vacuolar protein sorting-associated protein 51	5	2	2	2	2	0	2	0	2	0	2	0	2	0	2	0	12.6	12.6	12.6	22.186	199	199;658;782;72;99	0.00043346	3.0639	0.94198	1.0029	22.732	5	1	Leave out requantified	1.1038	NaN	0.59478	NaN	1.0029	NaN	0.7902	NaN
FHL2	Four and a half LIM domains protein 2	1.0069	NaN	1.2068	NaN	A0A0A0MSG2;J3KNW4;Q14192	A0A0A0MSG2;J3KNW4;Q14192	3;3;3	3;3;3	3;3;3	tr|A0A0A0MSG2|A0A0A0MSG2_HUMAN Isoform of Q14192, Four and a half LIM domains protein 2 OS=Homo sapiens OX=9606 GN=FHL2 PE=1 SV=1;tr|J3KNW4|J3KNW4_HUMAN Isoform of Q14192, Four and a half LIM domains protein 2 OS=Homo sapiens OX=9606 GN=FHL2 PE=1 SV=1;sp|Q	3	3	3	3	3	0	1	0	3	0	1	0	3	0	1	0	11.4	11.4	11.4	44.838	395	395;389;279	0	101.71	1.0383	1.0069	15.872	4	1	Leave out requantified	1.0383	NaN	0.77955	NaN	1.0069	NaN	1.2068	NaN
AKR1A1	Alcohol dehydrogenase [NADP(+)]	1.0076	NaN	1.3557	NaN	P14550;V9GYG2;V9GYP9;Q5T621	P14550;V9GYG2;V9GYP9;Q5T621	4;2;2;2	4;2;2;2	4;2;2;2	sp|P14550|AK1A1_HUMAN Aldo-keto reductase family 1 member A1 OS=Homo sapiens OX=9606 GN=AKR1A1 PE=1 SV=3;tr|V9GYG2|V9GYG2_HUMAN Isoform of P14550, Aldo-keto reductase family 1 member A1 OS=Homo sapiens OX=9606 GN=AKR1A1 PE=1 SV=1;tr|V9GYP9|V9GYP9_HUMAN Iso	4	4	4	4	1	0	4	0	1	0	4	0	1	0	4	0	14.8	14.8	14.8	36.573	325	325;119;140;147	0	4.6867	0.8884	1.2671	8.7179	5	0	Leave out requantified	1.0746	NaN	0.8884	NaN	1.0076	NaN	1.3557	NaN
EIF4H	Eukaryotic translation initiation factor 4H	1.0098	NaN	1.3469	NaN	Q15056-2;Q15056	Q15056-2;Q15056	3;3	3;3	3;3	sp|Q15056-2|IF4H-2_HUMAN Isoform of Q15056, Isoform Short of Eukaryotic translation initiation factor 4H OS=Homo sapiens OX=9606 GN=EIF4H PE=1 SV=5;sp|Q15056|IF4H_HUMAN Eukaryotic translation initiation factor 4H OS=Homo sapiens OX=9606 GN=EIF4H PE=1 SV=5	2	3	3	3	3	0	2	1	3	0	2	1	3	0	2	1	15.8	15.8	15.8	25.2	228	228;248	0	43.299	0.92472	1.3469	37.634	6	0	Leave out requantified	1.0212	NaN	0.88885	NaN	1.0098	NaN	1.3469	NaN
MCTS1	Malignant T-cell-amplified sequence 1	1.0101	NaN	NaN	NaN	A0A3B3IRV3;Q9ULC4-2;Q9ULC4;Q9ULC4-3	A0A3B3IRV3;Q9ULC4-2;Q9ULC4;Q9ULC4-3	2;2;2;2	2;2;2;2	2;2;2;2	tr|A0A3B3IRV3|A0A3B3IRV3_HUMAN Malignant T-cell-amplified sequence OS=Homo sapiens OX=9606 GN=MCTS2P PE=3 SV=1;sp|Q9ULC4-2|MCTS1-2_HUMAN Isoform of Q9ULC4, Isoform 2 of Malignant T-cell-amplified sequence 1 OS=Homo sapiens OX=9606 GN=MCTS1 PE=1 SV=1;sp|Q9U	4	2	2	2	1	1	0	0	1	1	0	0	1	1	0	0	17.1	17.1	17.1	20.343	181	181;169;181;182	0	3.8577	1.0426	1.0101	NaN	1	0	Median	1.0426	NaN	NaN	NaN	1.0101	NaN	NaN	NaN
KIF11	Kinesin-like protein KIF11	1.0158	NaN	0.89369	NaN	P52732	P52732	2	2	2	sp|P52732|KIF11_HUMAN Kinesin-like protein KIF11 OS=Homo sapiens OX=9606 GN=KIF11 PE=1 SV=2	1	2	2	2	1	1	1	1	1	1	1	1	1	1	1	1	2.3	2.3	2.3	119.16	1056	1056	0	12.035	0.79742	0.95279	9.056	2	0	Median	1.0946	NaN	0.58091	NaN	1.0158	NaN	0.89369	NaN
BCL2L1	Bcl-2-like protein 1	1.0192	NaN	0.79893	NaN	Q5QP59;Q5QP56;Q9H1R6;Q5TE64;Q07817-2;Q07817-3;Q07817	Q5QP59;Q5QP56;Q9H1R6;Q5TE64;Q07817-2;Q07817-3;Q07817	1;1;1;1;1;1;1	1;1;1;1;1;1;1	1;1;1;1;1;1;1	tr|Q5QP59|Q5QP59_HUMAN Isoform of Q07817, Bcl-2-like protein 1 (Fragment) OS=Homo sapiens OX=9606 GN=BCL2L1 PE=1 SV=1;tr|Q5QP56|Q5QP56_HUMAN Isoform of Q07817, Bcl-2-like protein 1 (Fragment) OS=Homo sapiens OX=9606 GN=BCL2L1 PE=1 SV=1;tr|Q9H1R6|Q9H1R6_HUM	7	1	1	1	1	0	1	0	1	0	1	0	1	0	1	0	20.8	20.8	20.8	5.5479	48	48;181;188;205;170;227;233	0.0038153	1.9497	0.78867	0.90238	17.221	2	0	Median	1.0422	NaN	0.5968	NaN	1.0192	NaN	0.79893	NaN
INSM2	Insulinoma-associated protein 2	1.0253	NaN	NaN	NaN	Q96T92	Q96T92	1	1	1	sp|Q96T92|INSM2_HUMAN Insulinoma-associated protein 2 OS=Homo sapiens OX=9606 GN=INSM2 PE=1 SV=3	1	1	1	1	1	0	0	0	1	0	0	0	1	0	0	0	2.7	2.7	2.7	59.491	566	566	0.0041478	1.8749	1.0417	1.0253	NaN	1	0	Median	1.0417	NaN	NaN	NaN	1.0253	NaN	NaN	NaN
SPRYD3	SPRY domain-containing protein 3	1.0256	NaN	1.1173	NaN	F8VWW7;Q8NCJ5	F8VWW7;Q8NCJ5	1;1	1;1	1;1	tr|F8VWW7|F8VWW7_HUMAN Isoform of Q8NCJ5, SPRY domain-containing protein 3 OS=Homo sapiens OX=9606 GN=SPRYD3 PE=1 SV=1;sp|Q8NCJ5|SPRY3_HUMAN SPRY domain-containing protein 3 OS=Homo sapiens OX=9606 GN=SPRYD3 PE=1 SV=2	2	1	1	1	1	0	1	0	1	0	1	0	1	0	1	0	2.3	2.3	2.3	53.789	479	479;442	0.0012029	2.3173	0.98797	1.0705	6.0555	2	0	Median	1.0903	NaN	0.89526	NaN	1.0256	NaN	1.1173	NaN
PDXK	Pyridoxal kinase	1.0264	NaN	1.3602	NaN	A8MV33;O00764-2;O00764	A8MV33;O00764-2;O00764	1;1;1	1;1;1	1;1;1	tr|A8MV33|A8MV33_HUMAN Isoform of O00764, HCG401289, isoform CRA_b OS=Homo sapiens OX=9606 GN=PDXK PE=1 SV=1;sp|O00764-2|PDXK-2_HUMAN Isoform of O00764, Isoform 2 of Pyridoxal kinase OS=Homo sapiens OX=9606 GN=PDXK PE=1 SV=1;sp|O00764|PDXK_HUMAN Pyridoxal	3	1	1	1	1	0	1	0	1	0	1	0	1	0	1	0	11.5	11.5	11.5	9.6378	87	87;284;312	0.00863	1.5306	0.96386	1.1816	19.908	2	0	Median	1.0684	NaN	0.86954	NaN	1.0264	NaN	1.3602	NaN
ARF1;ARF3;ARF5	ADP-ribosylation factor 1;ADP-ribosylation factor 3;ADP-ribosylation factor 5	1.0329	NaN	1.5552	NaN	P84077;P61204;F5H423;P61204-2;F5H0C7;C9J1Z8;P84085;H0YGG7	P84077;P61204;F5H423;P61204-2;F5H0C7;C9J1Z8;P84085	4;4;3;3;2;2;2;1	4;4;3;3;2;2;2;1	3;3;2;2;1;1;1;1	sp|P84077|ARF1_HUMAN ADP-ribosylation factor 1 OS=Homo sapiens OX=9606 GN=ARF1 PE=1 SV=2;sp|P61204|ARF3_HUMAN ADP-ribosylation factor 3 OS=Homo sapiens OX=9606 GN=ARF3 PE=1 SV=2;tr|F5H423|F5H423_HUMAN Uncharacterized protein OS=Homo sapiens OX=9606 PE=3 SV	8	4	4	3	3	0	4	0	3	0	4	0	2	0	3	0	27.6	27.6	21.5	20.697	181	181;181;210;144;102;150;180;62	0	32.017	0.919	1.3776	14.738	8	0	Leave out requantified	1.055	NaN	0.82617	NaN	1.0329	NaN	1.5552	NaN
AGO2;AGO3	Protein argonaute-2;Protein argonaute-3	1.0329	NaN	1.1074	NaN	Q9UKV8-2;Q9UKV8;Q9H9G7-2;Q9H9G7;Q5TA58;Q9UL18;Q9HCK5	Q9UKV8-2;Q9UKV8;Q9H9G7-2;Q9H9G7	4;4;2;2;1;1;1	4;4;2;2;1;1;1	4;4;2;2;1;1;1	sp|Q9UKV8-2|AGO2-2_HUMAN Isoform of Q9UKV8, Isoform 2 of Protein argonaute-2 OS=Homo sapiens OX=9606 GN=AGO2 PE=1 SV=3;sp|Q9UKV8|AGO2_HUMAN Protein argonaute-2 OS=Homo sapiens OX=9606 GN=AGO2 PE=1 SV=3;sp|Q9H9G7-2|AGO3-2_HUMAN Isoform of Q9H9G7, Isoform 2	7	4	4	4	4	0	1	0	4	0	1	0	4	0	1	0	6.5	6.5	6.5	93.619	825	825;859;626;860;782;857;861	0	6.4165	0.90927	1.0337	21.602	4	0	Leave out requantified	1.0853	NaN	0.7618	NaN	1.0329	NaN	1.1074	NaN
DNTTIP1	Deoxynucleotidyltransferase terminal-interacting protein 1	1.0382	NaN	0.99157	NaN	H7C1J2;H7C1M5;Q9H147	H7C1J2;H7C1M5;Q9H147	1;1;1	1;1;1	1;1;1	tr|H7C1J2|H7C1J2_HUMAN Isoform of Q9H147, Deoxynucleotidyltransferase terminal-interacting protein 1 (Fragment) OS=Homo sapiens OX=9606 GN=DNTTIP1 PE=1 SV=1;tr|H7C1M5|H7C1M5_HUMAN Isoform of Q9H147, Deoxynucleotidyltransferase terminal-interacting protein	3	1	1	1	1	0	1	0	1	0	1	0	1	0	1	0	5.2	5.2	5.2	26.352	232	232;280;329	0.0073746	1.6577	0.82537	1.0146	3.2478	2	0	Median	1.0701	NaN	0.63661	NaN	1.0382	NaN	0.99157	NaN
PDPR	Pyruvate dehydrogenase phosphatase regulatory subunit, mitochondrial	1.0388	NaN	0.4405	NaN	Q8NCN5;A8MT40;H3BQG3	Q8NCN5;A8MT40;H3BQG3	3;3;2	3;3;2	3;3;2	sp|Q8NCN5|PDPR_HUMAN Pyruvate dehydrogenase phosphatase regulatory subunit, mitochondrial OS=Homo sapiens OX=9606 GN=PDPR PE=1 SV=2;tr|A8MT40|A8MT40_HUMAN Isoform of Q8NCN5, Pyruvate dehydrogenase phosphatase regulatory subunit, mitochondrial OS=Homo sapie	3	3	3	3	2	0	1	0	2	0	1	0	2	0	1	0	4.8	4.8	4.8	99.363	879	879;779;491	0	4.2482	1.0651	0.99804	49.695	3	0	Leave out requantified	1.1141	NaN	0.33746	NaN	1.0388	NaN	0.4405	NaN
		1.0418	NaN	NaN	NaN	REV__A0A0A0MSA4	REV__A0A0A0MSA4	1	1	1	tr|A0A0A0MSA4|A0A0A0MSA4_HUMAN Isoform of Q9Y2J2, Band 4.1-like protein 3 OS=Homo sapiens OX=9606 GN=EPB41L3 PE=1 SV=1	1	1	1	1	1	0	0	0	1	0	0	0	1	0	0	0	0	0	0	116.17	1046	1046	0.0012053	2.3245	1.0592	1.0418	NaN	1	0	Median	1.0592	NaN	NaN	NaN	1.0418	NaN	NaN	NaN
		1.0427	NaN	NaN	NaN	REV__H3BSM9;REV__Q9NSC2-2;REV__Q9NSC2	REV__H3BSM9;REV__Q9NSC2-2;REV__Q9NSC2	1;1;1	1;1;1	1;1;1	tr|H3BSM9|H3BSM9_HUMAN Isoform of Q9NSC2, Sal-like protein 1 (Fragment) OS=Homo sapiens OX=9606 GN=SALL1 PE=1 SV=1;sp|Q9NSC2-2|SALL1-2_HUMAN Isoform of Q9NSC2, Isoform 2 of Sal-like protein 1 OS=Homo sapiens OX=9606 GN=SALL1 PE=1 SV=2;sp|Q9NSC2|SALL1_HUMAN	3	1	1	1	1	0	0	0	1	0	0	0	1	0	0	0	0	0	0	122.01	1154	1154;1227;1324	1	-2	1.0699	1.0427	NaN	1	0	Median	1.0699	NaN	NaN	NaN	1.0427	NaN	NaN	NaN
FEN1	Flap endonuclease 1	1.0432	NaN	0.94007	NaN	P39748;F5H1Y3;P39748-2;I3L3E9	P39748;F5H1Y3;P39748-2	3;2;2;1	3;2;2;1	3;2;2;1	sp|P39748|FEN1_HUMAN Flap endonuclease 1 OS=Homo sapiens OX=9606 GN=FEN1 PE=1 SV=1;tr|F5H1Y3|F5H1Y3_HUMAN Isoform of P39748, Flap endonuclease 1 (Fragment) OS=Homo sapiens OX=9606 GN=FEN1 PE=1 SV=1;sp|P39748-2|FEN1-2_HUMAN Isoform of P39748, Isoform FENMIT	4	3	3	3	3	0	3	0	3	0	3	0	3	0	3	0	12.4	12.4	12.4	42.592	380	380;165;316;154	0	48.067	0.91742	1.0352	9.3463	6	0	Leave out requantified	1.14	NaN	0.69001	NaN	1.0432	NaN	0.94007	NaN
HSPE1	10 kDa heat shock protein, mitochondrial	1.0445	NaN	1.5657	NaN	P61604;B8ZZ54;B8ZZL8	P61604;B8ZZ54;B8ZZL8	3;2;2	3;2;2	2;2;1	sp|P61604|CH10_HUMAN 10 kDa heat shock protein, mitochondrial OS=Homo sapiens OX=9606 GN=HSPE1 PE=1 SV=2;tr|B8ZZ54|B8ZZ54_HUMAN Isoform of P61604, 10 kDa heat shock protein, mitochondrial OS=Homo sapiens OX=9606 GN=HSPE1 PE=1 SV=1;tr|B8ZZL8|B8ZZL8_HUMAN Is	3	3	3	2	2	0	2	0	2	0	2	0	1	0	1	0	35.3	35.3	21.6	10.932	102	102;47;101	0	10.36	1.0068	1.38	19.267	4	0	Leave out requantified	1.0573	NaN	0.93572	NaN	1.0445	NaN	1.5657	NaN
QSOX2	Sulfhydryl oxidase;Sulfhydryl oxidase 2	1.05	NaN	NaN	NaN	H0Y430;Q6ZRP7	H0Y430;Q6ZRP7	1;1	1;1	1;1	tr|H0Y430|H0Y430_HUMAN Isoform of Q6ZRP7, Sulfhydryl oxidase (Fragment) OS=Homo sapiens OX=9606 GN=QSOX2 PE=1 SV=1;sp|Q6ZRP7|QSOX2_HUMAN Sulfhydryl oxidase 2 OS=Homo sapiens OX=9606 GN=QSOX2 PE=1 SV=3	2	1	1	1	1	0	0	0	1	0	0	0	1	0	0	0	3.9	3.9	3.9	32.458	284	284;698	0.00080906	2.3885	1.1198	1.05	NaN	1	0	Median	1.1198	NaN	NaN	NaN	1.05	NaN	NaN	NaN
TKFC;DAK	Bifunctional ATP-dependent dihydroxyacetone kinase/FAD-AMP lyase (cyclizing);ATP-dependent dihydroxyacetone kinase;FAD-AMP lyase (cyclizing)	1.0527	NaN	1.0178	NaN	I3L252;H0YCY6;Q3LXA3-2;Q3LXA3	I3L252;H0YCY6;Q3LXA3-2;Q3LXA3	1;1;1;1	1;1;1;1	1;1;1;1	tr|I3L252|I3L252_HUMAN Isoform of Q3LXA3, Triokinase/FMN cyclase (Fragment) OS=Homo sapiens OX=9606 GN=TKFC PE=1 SV=1;tr|H0YCY6|H0YCY6_HUMAN Isoform of Q3LXA3, Triokinase/FMN cyclase (Fragment) OS=Homo sapiens OX=9606 GN=TKFC PE=1 SV=1;sp|Q3LXA3-2|TKFC-2_H	4	1	1	1	1	0	1	0	1	0	1	0	1	0	1	0	5.5	5.5	5.5	22.951	219	219;533;534;575	0.0012048	2.3243	0.92959	1.0351	2.3873	2	0	Median	1.1546	NaN	0.74841	NaN	1.0527	NaN	1.0178	NaN
MUC16	Mucin-16	1.0536	NaN	NaN	NaN	Q8WXI7	Q8WXI7	1	1	1	sp|Q8WXI7|MUC16_HUMAN Mucin-16 OS=Homo sapiens OX=9606 GN=MUC16 PE=1 SV=3	1	1	1	1	1	0	0	0	1	0	0	0	1	0	0	0	0.2	0.2	0.2	1519.2	14507	14507	0	3.5293	1.066	1.0536	NaN	1	0	Median	1.066	NaN	NaN	NaN	1.0536	NaN	NaN	NaN
PIK3R2	Phosphatidylinositol 3-kinase regulatory subunit beta	1.057	NaN	1.1083	NaN	E9PFP1;O00459	E9PFP1;O00459	1;1	1;1	1;1	tr|E9PFP1|E9PFP1_HUMAN Isoform of O00459, Phosphatidylinositol 3-kinase regulatory subunit beta OS=Homo sapiens OX=9606 GN=PIK3R2 PE=1 SV=1;sp|O00459|P85B_HUMAN Phosphatidylinositol 3-kinase regulatory subunit beta OS=Homo sapiens OX=9606 GN=PIK3R2 PE=1 SV	2	1	1	1	1	1	1	0	1	1	1	0	1	1	1	0	2.5	2.5	2.5	52.699	481	481;728	0.00044248	3.34	0.96815	1.0823	3.351	2	0	Median	1.1673	NaN	0.803	NaN	1.057	NaN	1.1083	NaN
RCN1	Reticulocalbin-1	1.0596	NaN	1.012	NaN	Q15293;Q15293-2	Q15293;Q15293-2	3;2	3;2	3;2	sp|Q15293|RCN1_HUMAN Reticulocalbin-1 OS=Homo sapiens OX=9606 GN=RCN1 PE=1 SV=1;sp|Q15293-2|RCN1-2_HUMAN Isoform of Q15293, Isoform 2 of Reticulocalbin-1 OS=Homo sapiens OX=9606 GN=RCN1 PE=1 SV=1	2	3	3	3	2	0	3	0	2	0	3	0	2	0	3	0	12.7	12.7	12.7	38.89	331	331;280	0	31.264	0.8187	1.0675	24.206	5	1	Leave out requantified	1.1115	NaN	0.57871	NaN	1.0596	NaN	1.012	NaN
GNPNAT1	Glucosamine 6-phosphate N-acetyltransferase	1.0606	NaN	NaN	NaN	G3V5E4;G3V4W4;Q96EK6	G3V5E4;G3V4W4;Q96EK6	1;1;1	1;1;1	1;1;1	tr|G3V5E4|G3V5E4_HUMAN Isoform of Q96EK6, Glucosamine 6-phosphate N-acetyltransferase OS=Homo sapiens OX=9606 GN=GNPNAT1 PE=1 SV=1;tr|G3V4W4|G3V4W4_HUMAN Isoform of Q96EK6, Glucosamine 6-phosphate N-acetyltransferase (Fragment) OS=Homo sapiens OX=9606 GN=G	3	1	1	1	1	0	0	0	1	0	0	0	1	0	0	0	9.7	9.7	9.7	12.976	113	113;163;184	0.0072648	1.5866	1.0824	1.0606	NaN	1	0	Median	1.0824	NaN	NaN	NaN	1.0606	NaN	NaN	NaN
LSM3	U6 snRNA-associated Sm-like protein LSm3	1.0667	NaN	NaN	NaN	P62310	P62310	1	1	1	sp|P62310|LSM3_HUMAN U6 snRNA-associated Sm-like protein LSm3 OS=Homo sapiens OX=9606 GN=LSM3 PE=1 SV=2	1	1	1	1	1	0	0	0	1	0	0	0	1	0	0	0	11.8	11.8	11.8	11.845	102	102	0.0048707	1.816	1.0647	1.0667	NaN	1	0	Median	1.0647	NaN	NaN	NaN	1.0667	NaN	NaN	NaN
ALDH9A1	4-trimethylaminobutyraldehyde dehydrogenase	1.0692	NaN	1.1981	NaN	P49189;P49189-2;P49189-3	P49189;P49189-2;P49189-3	4;3;3	4;3;3	4;3;3	sp|P49189|AL9A1_HUMAN 4-trimethylaminobutyraldehyde dehydrogenase OS=Homo sapiens OX=9606 GN=ALDH9A1 PE=1 SV=3;sp|P49189-2|AL9A1-2_HUMAN Isoform of P49189, Isoform 2 of 4-trimethylaminobutyraldehyde dehydrogenase OS=Homo sapiens OX=9606 GN=ALDH9A1 PE=1 SV=	3	4	4	4	4	0	4	0	4	0	4	0	4	0	4	0	10.9	10.9	10.9	53.801	494	494;424;518	0	14.016	1.0337	1.0943	27.957	6	0	Leave out requantified	1.0841	NaN	0.93899	NaN	1.0692	NaN	1.1981	NaN
ZMYM3	Zinc finger MYM-type protein 3	1.0758	NaN	1.0372	NaN	A6NHB5;Q14202-2;Q14202;A6NL54;A6NHN7;Q14202-3	A6NHB5;Q14202-2;Q14202;A6NL54;A6NHN7;Q14202-3	2;2;2;1;1;1	2;2;2;1;1;1	2;2;2;1;1;1	tr|A6NHB5|A6NHB5_HUMAN Isoform of Q14202, Zinc finger MYM-type protein 3 OS=Homo sapiens OX=9606 GN=ZMYM3 PE=1 SV=1;sp|Q14202-2|ZMYM3-2_HUMAN Isoform of Q14202, Isoform 2 of Zinc finger MYM-type protein 3 OS=Homo sapiens OX=9606 GN=ZMYM3 PE=1 SV=2;sp|Q1420	6	2	2	2	1	0	2	0	1	0	2	0	1	0	2	0	2.5	2.5	2.5	152.6	1372	1372;1358;1370;497;1280;495	0	5.1774	0.87173	1.3646	27.512	3	1	Plateau	1.1217	NaN	0.7568	NaN	1.0758	NaN	1.0372	NaN
ATP1B3	Sodium/potassium-transporting ATPase subunit beta-3	1.0857	NaN	0.99539	NaN	P54709;H7C4L9;H7C547;F8WBY4;C9JA36;P54709-2	P54709;H7C4L9;H7C547;F8WBY4;C9JA36;P54709-2	2;1;1;1;1;1	2;1;1;1;1;1	2;1;1;1;1;1	sp|P54709|AT1B3_HUMAN Sodium/potassium-transporting ATPase subunit beta-3 OS=Homo sapiens OX=9606 GN=ATP1B3 PE=1 SV=1;tr|H7C4L9|H7C4L9_HUMAN Isoform of P54709, Sodium/potassium-transporting ATPase subunit beta-3 (Fragment) OS=Homo sapiens OX=9606 GN=ATP1B3	6	2	2	2	2	0	1	0	2	0	1	0	2	0	1	0	9	9	9	31.512	279	279;27;43;44;133;193	0	3.4598	1.2608	0.99539	28.481	3	1	Plateau	1.1042	NaN	0.70026	NaN	1.0857	NaN	0.99539	NaN
TAF9;AK6	Adenylate kinase isoenzyme 6	1.0878	NaN	1.0309	NaN	A0A087WY94;A0A087WVD7;Q9Y3D8	A0A087WY94;A0A087WVD7;Q9Y3D8	1;1;1	1;1;1	1;1;1	tr|A0A087WY94|A0A087WY94_HUMAN Isoform of Q9Y3D8, Adenylate kinase isoenzyme 6 OS=Homo sapiens OX=9606 GN=AK6 PE=1 SV=1;tr|A0A087WVD7|A0A087WVD7_HUMAN Isoform of Q9Y3D8, Adenylate kinase isoenzyme 6 OS=Homo sapiens OX=9606 GN=AK6 PE=1 SV=1;sp|Q9Y3D8|KAD6_H	3	1	1	1	1	0	1	0	1	0	1	0	1	0	1	0	34	34	34	4.9969	47	47;109;172	0	3.7479	0.73345	1.1161	8.5288	3	1	Plateau	1.116	NaN	0.71754	NaN	1.0878	NaN	1.0309	NaN
KDM1B	Lysine-specific histone demethylase 1B	1.0888	NaN	NaN	NaN	H0Y6H0;Q8NB78-2;Q8NB78	H0Y6H0;Q8NB78-2;Q8NB78	1;1;1	1;1;1	1;1;1	tr|H0Y6H0|H0Y6H0_HUMAN Isoform of Q8NB78, Lysine-specific histone demethylase 1B OS=Homo sapiens OX=9606 GN=KDM1B PE=1 SV=2;sp|Q8NB78-2|KDM1B-2_HUMAN Isoform of Q8NB78, Isoform 2 of Lysine-specific histone demethylase 1B OS=Homo sapiens OX=9606 GN=KDM1B PE	3	1	1	1	1	0	0	0	1	0	0	0	1	0	0	0	1.5	1.5	1.5	92.225	823	823;590;822	0.00080386	2.332	1.1604	1.0888	NaN	1	0	Median	1.1604	NaN	NaN	NaN	1.0888	NaN	NaN	NaN
ARPC1B	Actin-related protein 2/3 complex subunit 1B	1.0905	NaN	1.2651	NaN	O15143;C9JEY1;C9K057;A0A1W2PNV4;C9JBJ7;C9J4Z7;F8VXW2;C9JQM8;C9JFG9;C9J6C8	O15143;C9JEY1;C9K057;A0A1W2PNV4	3;2;2;2;1;1;1;1;1;1	3;2;2;2;1;1;1;1;1;1	3;2;2;2;1;1;1;1;1;1	sp|O15143|ARC1B_HUMAN Actin-related protein 2/3 complex subunit 1B OS=Homo sapiens OX=9606 GN=ARPC1B PE=1 SV=3;tr|C9JEY1|C9JEY1_HUMAN Isoform of O15143, Actin-related protein 2/3 complex subunit 1B (Fragment) OS=Homo sapiens OX=9606 GN=ARPC1B PE=1 SV=2;tr|	10	3	3	3	1	0	3	0	1	0	3	0	1	0	3	0	11	11	11	40.949	372	372;334;352;684;102;128;130;132;132;132	0	5.7611	0.81778	1.1746	29.1	4	1	Median	1.1307	NaN	0.81258	NaN	1.0905	NaN	1.2651	NaN
FH	Fumarate hydratase, mitochondrial	1.0917	NaN	1.1811	NaN	P07954-2;P07954	P07954-2;P07954	4;4	4;4	4;4	sp|P07954-2|FUMH-2_HUMAN Isoform of P07954, Isoform Cytoplasmic of Fumarate hydratase, mitochondrial OS=Homo sapiens OX=9606 GN=FH PE=1 SV=3;sp|P07954|FUMH_HUMAN Fumarate hydratase, mitochondrial OS=Homo sapiens OX=9606 GN=FH PE=1 SV=3	2	4	4	4	3	0	4	0	3	0	4	0	3	0	4	0	16.3	16.3	16.3	50.212	467	467;510	0	137.74	0.96693	1.1733	1.6039	5	0	Leave out requantified	1.1735	NaN	0.90984	NaN	1.0917	NaN	1.1811	NaN
COG6	Conserved oligomeric Golgi complex subunit 6	1.0919	NaN	1.4391	NaN	Q9Y2V7-2;Q9Y2V7	Q9Y2V7-2;Q9Y2V7	3;3	3;3	3;3	sp|Q9Y2V7-2|COG6-2_HUMAN Isoform of Q9Y2V7, Isoform 2 of Conserved oligomeric Golgi complex subunit 6 OS=Homo sapiens OX=9606 GN=COG6 PE=1 SV=2;sp|Q9Y2V7|COG6_HUMAN Conserved oligomeric Golgi complex subunit 6 OS=Homo sapiens OX=9606 GN=COG6 PE=1 SV=2	2	3	3	3	3	0	3	0	3	0	3	0	3	0	3	0	6.3	6.3	6.3	68.411	615	615;657	0	6.1309	1.0945	1.2584	1.0232	6	0	Leave out requantified	1.2029	NaN	1.0158	NaN	1.0919	NaN	1.4391	NaN
PKMYT1	Membrane-associated tyrosine- and threonine-specific cdc2-inhibitory kinase	1.0948	NaN	1.2014	NaN	A6NHV6;B4DZM6;Q99640-4;Q99640-2;Q99640-3;Q99640	A6NHV6;B4DZM6;Q99640-4;Q99640-2;Q99640-3;Q99640	1;1;1;1;1;1	1;1;1;1;1;1	1;1;1;1;1;1	tr|A6NHV6|A6NHV6_HUMAN Isoform of Q99640, Membrane-associated tyrosine- and threonine-specific cdc2-inhibitory kinase OS=Homo sapiens OX=9606 GN=PKMYT1 PE=1 SV=3;tr|B4DZM6|B4DZM6_HUMAN Isoform of Q99640, Membrane-associated tyrosine- and threonine-specific	6	1	1	1	1	0	1	0	1	0	1	0	1	0	1	0	2.9	2.9	2.9	48.891	447	447;568;430;480;490;499	0	3.7502	1.0291	1.1469	6.5642	2	1	Median	1.1249	NaN	0.94141	NaN	1.0948	NaN	1.2014	NaN
RGPD5;RGPD8	RANBP2-like and GRIP domain-containing protein 5/6;RANBP2-like and GRIP domain-containing protein 8	1.1027	NaN	NaN	NaN	Q99666;O14715;J3KQ37;F8W705;Q99666-2	Q99666;O14715;J3KQ37;F8W705;Q99666-2	7;7;6;4;4	1;1;1;1;1	1;1;1;1;1	sp|Q99666|RGPD5_HUMAN RANBP2-like and GRIP domain-containing protein 5/6 OS=Homo sapiens OX=9606 GN=RGPD6 PE=1 SV=3;sp|O14715|RGPD8_HUMAN RANBP2-like and GRIP domain-containing protein 8 OS=Homo sapiens OX=9606 GN=RGPD8 PE=1 SV=2;tr|J3KQ37|J3KQ37_HUMAN Iso	5	7	1	1	6	5	4	3	1	0	0	0	1	0	0	0	5.1	1	1	198.92	1765	1765;1765;1625;904;904	0.0096051	1.4648	1.1569	1.1027	NaN	1	1	Median	1.1569	NaN	NaN	NaN	1.1027	NaN	NaN	NaN
ARID1B;ARID1A	AT-rich interactive domain-containing protein 1B;AT-rich interactive domain-containing protein 1A	1.1195	NaN	NaN	NaN	H0Y3S9;A0A1B0GTJ8;A0A1B0GTU5;H0Y2R3;H0Y7H8;A0A1B0GVK1;H0Y488;A0A1B0GWJ2;A0A1B0GV63;A0A087WUV6;A0A3F2YNW7;Q8NFD5-4;O14497-3;O14497-2;Q8NFD5;Q8NFD5-2;O14497;Q8NFD5-3	H0Y3S9;A0A1B0GTJ8;A0A1B0GTU5;H0Y2R3;H0Y7H8;A0A1B0GVK1;H0Y488;A0A1B0GWJ2;A0A1B0GV63;A0A087WUV6;A0A3F2YNW7;Q8NFD5-4;O14497-3;O14497-2;Q8NFD5;Q8NFD5-2;O14497;Q8NFD5-3	1;1;1;1;1;1;1;1;1;1;1;1;1;1;1;1;1;1	1;1;1;1;1;1;1;1;1;1;1;1;1;1;1;1;1;1	1;1;1;1;1;1;1;1;1;1;1;1;1;1;1;1;1;1	tr|H0Y3S9|H0Y3S9_HUMAN Isoform of Q8NFD5, AT-rich interactive domain-containing protein 1B (Fragment) OS=Homo sapiens OX=9606 GN=ARID1B PE=1 SV=1;tr|A0A1B0GTJ8|A0A1B0GTJ8_HUMAN Isoform of Q8NFD5, AT-rich interactive domain-containing protein 1B (Fragment)	18	1	1	1	1	0	0	0	1	0	0	0	1	0	0	0	7.3	7.3	7.3	29.454	273	273;1495;1903;727;1758;1539;1901;1479;1349;1141;2332;1486;1902;2068;2236;2249;2285;2289	0.00043937	3.2616	1.1508	1.1195	NaN	1	0	Median	1.1508	NaN	NaN	NaN	1.1195	NaN	NaN	NaN
DYNLT1	Dynein light chain Tctex-type 1	1.1212	NaN	NaN	NaN	P63172	P63172	1	1	1	sp|P63172|DYLT1_HUMAN Dynein light chain Tctex-type 1 OS=Homo sapiens OX=9606 GN=DYNLT1 PE=1 SV=1	1	1	1	1	1	1	0	0	1	1	0	0	1	1	0	0	14.2	14.2	14.2	12.452	113	113	0	15.874	1.1337	1.1212	NaN	1	0	Median	1.1337	NaN	NaN	NaN	1.1212	NaN	NaN	NaN
LAMA2	Laminin subunit alpha-2	1.1214	NaN	NaN	NaN	P24043;A0A087WYF1;A0A087WX80	P24043;A0A087WYF1;A0A087WX80	2;1;1	2;1;1	2;1;1	sp|P24043|LAMA2_HUMAN Laminin subunit alpha-2 OS=Homo sapiens OX=9606 GN=LAMA2 PE=1 SV=4;tr|A0A087WYF1|A0A087WYF1_HUMAN Isoform of P24043, Laminin subunit alpha-2 OS=Homo sapiens OX=9606 GN=LAMA2 PE=1 SV=1;tr|A0A087WX80|A0A087WX80_HUMAN Isoform of P24043,	3	2	2	2	2	0	0	0	2	0	0	0	2	0	0	0	1.1	1.1	1.1	343.9	3122	3122;3118;3121	0.0095949	1.4528	1.2461	1.1214	NaN	1	0	Median	1.2461	NaN	NaN	NaN	1.1214	NaN	NaN	NaN
CLPP	ATP-dependent Clp protease proteolytic subunit;ATP-dependent Clp protease proteolytic subunit, mitochondrial	1.1418	NaN	1.4997	NaN	M0R208;Q16740	M0R208;Q16740	1;1	1;1	1;1	tr|M0R208|M0R208_HUMAN Isoform of Q16740, ATP-dependent Clp protease proteolytic subunit OS=Homo sapiens OX=9606 GN=CLPP PE=1 SV=1;sp|Q16740|CLPP_HUMAN ATP-dependent Clp protease proteolytic subunit, mitochondrial OS=Homo sapiens OX=9606 GN=CLPP PE=1 SV=1	2	1	1	1	1	0	1	0	1	0	1	0	1	0	1	0	17.9	17.9	17.9	20.568	190	190;277	0	15.965	0.99074	1.3086	19.278	2	1	Median	1.1772	NaN	0.83384	NaN	1.1418	NaN	1.4997	NaN
F11R	Junctional adhesion molecule A	1.1436	NaN	NaN	NaN	A0A087WY82;Q9Y624	A0A087WY82;Q9Y624	1;1	1;1	1;1	tr|A0A087WY82|A0A087WY82_HUMAN Isoform of Q9Y624, Junctional adhesion molecule A OS=Homo sapiens OX=9606 GN=F11R PE=1 SV=1;sp|Q9Y624|JAM1_HUMAN Junctional adhesion molecule A OS=Homo sapiens OX=9606 GN=F11R PE=1 SV=1	2	1	1	1	1	0	0	0	1	0	0	0	1	0	0	0	3.9	3.9	3.9	30.197	279	279;299	0.0072754	1.5979	1.1697	1.1436	NaN	1	0	Median	1.1697	NaN	NaN	NaN	1.1436	NaN	NaN	NaN
GCC2	GRIP and coiled-coil domain-containing protein 2	1.1468	NaN	NaN	NaN	Q8IWJ2;H7BYJ9;B8ZZW2	Q8IWJ2;H7BYJ9;B8ZZW2	2;1;1	2;1;1	2;1;1	sp|Q8IWJ2|GCC2_HUMAN GRIP and coiled-coil domain-containing protein 2 OS=Homo sapiens OX=9606 GN=GCC2 PE=1 SV=4;tr|H7BYJ9|H7BYJ9_HUMAN Isoform of Q8IWJ2, GRIP and coiled-coil domain-containing protein 2 (Fragment) OS=Homo sapiens OX=9606 GN=GCC2 PE=1 SV=1;	3	2	2	2	1	0	1	0	1	0	1	0	1	0	1	0	1.6	1.6	1.6	195.91	1684	1684;247;916	0	9.1928	1.2346	1.1468	NaN	1	1	Median	1.2346	NaN	NaN	NaN	1.1468	NaN	NaN	NaN
2008-09-01	Septin-8	1.1472	NaN	NaN	NaN	A0A0A0MRP8;C9J4G8;C9JV02;A0A087X142;A6NMH6;A6NFQ9;F8W8I8;Q92599-3;Q92599-2;Q92599-4;Q92599	A0A0A0MRP8;C9J4G8;C9JV02;A0A087X142;A6NMH6;A6NFQ9;F8W8I8;Q92599-3;Q92599-2;Q92599-4;Q92599	1;1;1;1;1;1;1;1;1;1;1	1;1;1;1;1;1;1;1;1;1;1	1;1;1;1;1;1;1;1;1;1;1	tr|A0A0A0MRP8|A0A0A0MRP8_HUMAN Isoform of Q92599, Septin 8 (Fragment) OS=Homo sapiens OX=9606 GN=SEPTIN8 PE=1 SV=6;tr|C9J4G8|C9J4G8_HUMAN Isoform of Q92599, Septin 8 (Fragment) OS=Homo sapiens OX=9606 GN=SEPTIN8 PE=1 SV=1;tr|C9JV02|C9JV02_HUMAN Isoform of	11	1	1	1	1	0	0	0	1	0	0	0	1	0	0	0	20.5	20.5	20.5	9.127	78	78;97;130;426;430;440;460;369;429;442;483	0	3.5901	1.198	1.1472	NaN	1	0	Median	1.198	NaN	NaN	NaN	1.1472	NaN	NaN	NaN
CASP6	Caspase-6;Caspase-6 subunit p18;Caspase-6 subunit p11	1.1507	NaN	1.142	NaN	P55212;P55212-2;D6RHU3	P55212;P55212-2;D6RHU3	2;2;1	2;2;1	2;2;1	sp|P55212|CASP6_HUMAN Caspase-6 OS=Homo sapiens OX=9606 GN=CASP6 PE=1 SV=2;sp|P55212-2|CASP6-2_HUMAN Isoform of P55212, Isoform Beta of Caspase-6 OS=Homo sapiens OX=9606 GN=CASP6 PE=1 SV=2;tr|D6RHU3|D6RHU3_HUMAN Isoform of P55212, Caspase-6 (Fragment) OS=H	3	2	2	2	2	0	1	0	2	0	1	0	2	0	1	0	10.6	10.6	10.6	33.31	293	293;204;143	0	3.5218	1.0569	1.3142	13.289	3	0	Plateau	1.2241	NaN	0.8941	NaN	1.1507	NaN	1.142	NaN
USP14	Ubiquitin carboxyl-terminal hydrolase;Ubiquitin carboxyl-terminal hydrolase 14	1.1582	NaN	1.0088	NaN	A6NJA2;P54578-2;P54578-3;P54578;J3QQT6;J3KS55	A6NJA2;P54578-2;P54578-3;P54578;J3QQT6;J3KS55	2;2;2;2;1;1	2;2;2;2;1;1	2;2;2;2;1;1	tr|A6NJA2|A6NJA2_HUMAN Isoform of P54578, Ubiquitin carboxyl-terminal hydrolase 14 OS=Homo sapiens OX=9606 GN=USP14 PE=1 SV=2;sp|P54578-2|UBP14-2_HUMAN Isoform of P54578, Isoform 2 of Ubiquitin carboxyl-terminal hydrolase 14 OS=Homo sapiens OX=9606 GN=USP1	6	2	2	2	2	0	1	0	2	0	1	0	2	0	1	0	5.4	5.4	5.4	51.086	448	448;459;483;494;20;28	0.00043029	2.9728	1.1961	1.0818	10.498	3	0	Median	1.2631	NaN	0.70515	NaN	1.1582	NaN	1.0088	NaN
IARS2	Isoleucine--tRNA ligase, mitochondrial	1.1606	NaN	3.1061	NaN	Q9NSE4	Q9NSE4	2	2	2	sp|Q9NSE4|SYIM_HUMAN Isoleucine--tRNA ligase, mitochondrial OS=Homo sapiens OX=9606 GN=IARS2 PE=1 SV=2	1	2	2	2	1	0	2	0	1	0	2	0	1	0	2	0	2.8	2.8	2.8	113.79	1012	1012	0.0023337	2.0725	1.2297	6.4841	102.83	3	1	Plateau	1.2297	NaN	1.9957	NaN	1.1606	NaN	3.1061	NaN
NOP10	H/ACA ribonucleoprotein complex subunit 3	1.1624	NaN	NaN	NaN	H0YM60;Q9NPE3	H0YM60;Q9NPE3	1;1	1;1	1;1	tr|H0YM60|H0YM60_HUMAN Isoform of Q9NPE3, H/ACA ribonucleoprotein complex subunit 3 OS=Homo sapiens OX=9606 GN=NOP10 PE=1 SV=1;sp|Q9NPE3|NOP10_HUMAN H/ACA ribonucleoprotein complex subunit 3 OS=Homo sapiens OX=9606 GN=NOP10 PE=1 SV=1	2	1	1	1	1	0	0	0	1	0	0	0	1	0	0	0	36.1	36.1	36.1	4.2337	36	36;64	1	-2	1.1821	1.1624	NaN	1	0	Median	1.1821	NaN	NaN	NaN	1.1624	NaN	NaN	NaN
HNRNPD	Heterogeneous nuclear ribonucleoprotein D0	1.1707	NaN	NaN	NaN	Q14103-2;Q14103-4;D6RBQ9	Q14103-2;Q14103-4;D6RBQ9	9;9;6	1;1;1	1;1;1	sp|Q14103-2|HNRPD-2_HUMAN Isoform of Q14103, Isoform 2 of Heterogeneous nuclear ribonucleoprotein D0 OS=Homo sapiens OX=9606 GN=HNRNPD PE=1 SV=1;sp|Q14103-4|HNRPD-4_HUMAN Isoform of Q14103, Isoform 4 of Heterogeneous nuclear ribonucleoprotein D0 OS=Homo sa	3	9	1	1	8	7	7	7	1	0	0	0	1	0	0	0	26.5	3.6	3.6	36.272	336	336;287;155	0.00080354	2.3265	1.1869	1.1707	NaN	1	0	Median	1.1869	NaN	NaN	NaN	1.1707	NaN	NaN	NaN
CHID1	Chitinase domain-containing protein 1	1.177	NaN	0.63208	NaN	E9PI70;E9PIP0;E9PRL3;E9PPH0;E9PPA0;Q9BWS9-3;Q9BWS9;Q9BWS9-2	E9PI70;E9PIP0;E9PRL3;E9PPH0;E9PPA0;Q9BWS9-3;Q9BWS9;Q9BWS9-2	1;1;1;1;1;1;1;1	1;1;1;1;1;1;1;1	1;1;1;1;1;1;1;1	tr|E9PI70|E9PI70_HUMAN Isoform of Q9BWS9, Chitinase domain-containing protein 1 (Fragment) OS=Homo sapiens OX=9606 GN=CHID1 PE=1 SV=8;tr|E9PIP0|E9PIP0_HUMAN Isoform of Q9BWS9, Chitinase domain-containing protein 1 (Fragment) OS=Homo sapiens OX=9606 GN=CHID	8	1	1	1	1	0	1	0	1	0	1	0	1	0	1	0	10.4	10.4	10.4	12.924	115	115;119;131;162;224;362;393;418	0.0023319	2.07	0.78863	0.86252	43.96	2	1	Median	1.2317	NaN	0.50494	NaN	1.177	NaN	0.63208	NaN
C7orf26	Uncharacterized protein C7orf26	1.1784	NaN	0.7184	NaN	Q96N11-2;Q96N11	Q96N11-2;Q96N11	1;1	1;1	1;1	sp|Q96N11-2|CG026-2_HUMAN Isoform of Q96N11, Isoform 2 of Uncharacterized protein C7orf26 OS=Homo sapiens OX=9606 GN=C7orf26 PE=2 SV=1;sp|Q96N11|CG026_HUMAN Uncharacterized protein C7orf26 OS=Homo sapiens OX=9606 GN=C7orf26 PE=2 SV=1	2	1	1	1	1	0	1	0	1	0	1	0	1	0	1	0	4	4	4	39.027	352	352;449	0.00080613	2.3626	0.84897	0.9201	34.997	2	1	Median	1.2393	NaN	0.5816	NaN	1.1784	NaN	0.7184	NaN
HTATSF1	HIV Tat-specific factor 1	1.1818	NaN	NaN	NaN	O43719;Q5H919;Q5H918	O43719;Q5H919;Q5H918	3;2;2	3;2;2	3;2;2	sp|O43719|HTSF1_HUMAN HIV Tat-specific factor 1 OS=Homo sapiens OX=9606 GN=HTATSF1 PE=1 SV=1;tr|Q5H919|Q5H919_HUMAN Isoform of O43719, HIV Tat-specific factor 1 (Fragment) OS=Homo sapiens OX=9606 GN=HTATSF1 PE=1 SV=1;tr|Q5H918|Q5H918_HUMAN Isoform of O4371	3	3	3	3	3	0	0	0	3	0	0	0	3	0	0	0	4.9	4.9	4.9	85.852	755	755;223;244	0.00043592	3.1651	1.2921	1.1818	8.2237	2	0	Median	1.2921	NaN	NaN	NaN	1.1818	NaN	NaN	NaN
HMGB1	High mobility group protein B1	1.1865	NaN	1.0279	NaN	Q5T7C4;P09429;B2RPK0	Q5T7C4;P09429	8;8;3	8;8;3	7;7;2	tr|Q5T7C4|Q5T7C4_HUMAN Isoform of P09429, High mobility group protein B1 OS=Homo sapiens OX=9606 GN=HMGB1 PE=1 SV=1;sp|P09429|HMGB1_HUMAN High mobility group protein B1 OS=Homo sapiens OX=9606 GN=HMGB1 PE=1 SV=3	3	8	8	7	4	0	7	0	4	0	7	0	4	0	6	0	48.7	48.7	41.1	18.311	158	158;215;211	0	15.664	0.78221	1.0938	12.263	12	0	Leave out requantified	1.1938	NaN	0.6754	NaN	1.1865	NaN	1.0279	NaN
NUP88	Nuclear pore complex protein Nup88	1.1892	NaN	NaN	NaN	Q99567;J3KMX1;I3L2W3	Q99567;J3KMX1	3;2;1	3;2;1	3;2;1	sp|Q99567|NUP88_HUMAN Nuclear pore complex protein Nup88 OS=Homo sapiens OX=9606 GN=NUP88 PE=1 SV=2;tr|J3KMX1|J3KMX1_HUMAN Isoform of Q99567, Nuclear pore complex protein Nup88 (Fragment) OS=Homo sapiens OX=9606 GN=NUP88 PE=1 SV=1	3	3	3	3	3	0	0	0	3	0	0	0	3	0	0	0	6.3	6.3	6.3	83.541	741	741;696;128	0	7.6028	1.3206	1.1892	8.2711	2	0	Median	1.3206	NaN	NaN	NaN	1.1892	NaN	NaN	NaN
WNK1	Serine/threonine-protein kinase WNK1	1.1952	NaN	0.96401	NaN	F5GWT4;Q9H4A3-2;Q9H4A3;Q9H4A3-5;Q9H4A3-6;Q9H4A3-7;F6UYG0;Q9H4A3-4	F5GWT4;Q9H4A3-2;Q9H4A3;Q9H4A3-5;Q9H4A3-6;Q9H4A3-7;F6UYG0;Q9H4A3-4	4;4;4;4;4;4;2;2	4;4;4;4;4;4;2;2	4;4;4;4;4;4;2;2	tr|F5GWT4|F5GWT4_HUMAN Isoform of Q9H4A3, Serine/threonine-protein kinase WNK1 OS=Homo sapiens OX=9606 GN=WNK1 PE=1 SV=1;sp|Q9H4A3-2|WNK1-2_HUMAN Isoform of Q9H4A3, Isoform 2 of Serine/threonine-protein kinase WNK1 OS=Homo sapiens OX=9606 GN=WNK1 PE=1 SV=2	8	4	4	4	4	0	1	0	4	0	1	0	4	0	1	0	2.8	2.8	2.8	225.5	2134	2134;2135;2382;2634;2642;2833;393;1975	0	14.949	1.2497	0.95283	44.643	5	3	Linear	1.245	NaN	0.61611	NaN	1.1952	NaN	0.96401	NaN
XPO4	Exportin-4	1.2134	NaN	1.0567	NaN	F2Z2X4;Q9C0E2	F2Z2X4;Q9C0E2	4;4	4;4	4;4	tr|F2Z2X4|F2Z2X4_HUMAN Isoform of Q9C0E2, Exportin-4 OS=Homo sapiens OX=9606 GN=XPO4 PE=1 SV=1;sp|Q9C0E2|XPO4_HUMAN Exportin-4 OS=Homo sapiens OX=9606 GN=XPO4 PE=1 SV=2	2	4	4	4	1	0	4	0	1	0	4	0	1	0	4	0	4.4	4.4	4.4	130.15	1151	1151;1151	0	5.6365	0.77877	1.0567	19.546	5	1	Leave out requantified	1.2432	NaN	0.77877	NaN	1.2134	NaN	1.0567	NaN
OSBP	Oxysterol-binding protein 1	1.2225	NaN	NaN	NaN	P22059	P22059	4	4	4	sp|P22059|OSBP1_HUMAN Oxysterol-binding protein 1 OS=Homo sapiens OX=9606 GN=OSBP PE=1 SV=1	1	4	4	4	3	0	1	0	3	0	1	0	3	0	1	0	9	9	9	89.42	807	807	0	6.6419	1.2713	1.2225	5.7283	2	0	Median	1.2713	NaN	NaN	NaN	1.2225	NaN	NaN	NaN
KIAA0391	Mitochondrial ribonuclease P protein 3	1.2246	NaN	0.72899	NaN	O15091-4;O15091-2;O15091;A0A0A0MTQ0;O15091-3	O15091-4;O15091-2;O15091;A0A0A0MTQ0;O15091-3	2;2;2;1;1	2;2;2;1;1	2;2;2;1;1	sp|O15091-4|MRPP3-4_HUMAN Isoform of O15091, Isoform 4 of Mitochondrial ribonuclease P catalytic subunit OS=Homo sapiens OX=9606 GN=KIAA0391 PE=1 SV=2;sp|O15091-2|MRPP3-2_HUMAN Isoform of O15091, Isoform 2 of Mitochondrial ribonuclease P catalytic subunit	5	2	2	2	1	0	2	0	1	0	2	0	1	0	2	0	4.7	4.7	4.7	56.486	488	488;567;583;185;211	0	12.679	0.63898	0.73065	29.947	3	1	Median	1.2603	NaN	0.63281	NaN	1.2246	NaN	0.72899	NaN
TPT1	Translationally-controlled tumor protein	1.2297	NaN	1.9724	NaN	Q5W0H4;A0A0B4J2C3;P13693;J3KPG2;P13693-2;H0YCX0;E9PJF7;Q56UQ5	Q5W0H4;A0A0B4J2C3;P13693;J3KPG2;P13693-2	3;3;3;2;2;1;1;1	3;3;3;2;2;1;1;1	3;3;3;2;2;1;1;1	tr|Q5W0H4|Q5W0H4_HUMAN Isoform of P13693, Translationally-controlled tumor protein OS=Homo sapiens OX=9606 GN=TPT1 PE=1 SV=1;tr|A0A0B4J2C3|A0A0B4J2C3_HUMAN Isoform of P13693, Translationally-controlled tumor protein OS=Homo sapiens OX=9606 GN=TPT1 PE=1 SV=	8	3	3	3	2	0	3	0	2	0	3	0	2	0	3	0	20.7	20.7	20.7	21.525	188	188;197;172;160;138;77;162;140	0	7.8659	1.243	1.9565	16.886	8	0	Leave out requantified	1.2513	NaN	1.2452	NaN	1.2297	NaN	1.9724	NaN
TCOF1	Treacle protein	1.2396	NaN	NaN	NaN	E7ETY2;Q13428-7;A0A3B3IS06;J3KQ96;Q13428-6;H0Y8Y7;Q13428-5;H0YA99;A0A2R8Y857	E7ETY2;Q13428-7;A0A3B3IS06;J3KQ96;Q13428-6;H0Y8Y7;Q13428-5	16;16;15;15;15;8;8;2;2	1;1;1;1;1;0;0;0;0	1;1;1;1;1;0;0;0;0	tr|E7ETY2|E7ETY2_HUMAN Isoform of Q13428, Treacle protein OS=Homo sapiens OX=9606 GN=TCOF1 PE=1 SV=1;sp|Q13428-7|TCOF-7_HUMAN Isoform of Q13428, Isoform 7 of Treacle protein OS=Homo sapiens OX=9606 GN=TCOF1 PE=1 SV=3;tr|A0A3B3IS06|A0A3B3IS06_HUMAN Isoform	9	16	1	1	8	5	14	3	1	0	0	0	1	0	0	0	14	1.9	1.9	152.3	1488	1488;1451;1358;1414;1450;994;958;188;297	1	-2	1.2743	1.2396	NaN	1	1	Median	1.2743	NaN	NaN	NaN	1.2396	NaN	NaN	NaN
PTMS	Parathymosin	1.2595	NaN	1.636	NaN	P20962;F5H7R9;F5GXR3	P20962;F5H7R9;F5GXR3	2;1;1	2;1;1	2;1;1	sp|P20962|PTMS_HUMAN Parathymosin OS=Homo sapiens OX=9606 GN=PTMS PE=1 SV=2;tr|F5H7R9|F5H7R9_HUMAN Isoform of P20962, Parathymosin (Fragment) OS=Homo sapiens OX=9606 GN=PTMS PE=1 SV=1;tr|F5GXR3|F5GXR3_HUMAN Isoform of P20962, Parathymosin OS=Homo sapiens O	3	2	2	2	1	0	1	0	1	0	1	0	1	0	1	0	22.5	22.5	22.5	11.53	102	102;57;104	0.00042974	2.9619	1.0305	1.4354	18.495	2	0	Median	1.2468	NaN	0.85178	NaN	1.2595	NaN	1.636	NaN
C8orf33	UPF0488 protein C8orf33	1.2726	NaN	0.97577	NaN	A0A3B3IRR6;A0A3B3IT54;A0A3B3ITA3;Q9H7E9;Q9H7E9-2	A0A3B3IRR6;A0A3B3IT54;A0A3B3ITA3;Q9H7E9;Q9H7E9-2	2;2;2;2;2	2;2;2;2;2	2;2;2;2;2	tr|A0A3B3IRR6|A0A3B3IRR6_HUMAN Isoform of Q9H7E9, UPF0488 protein C8orf33 OS=Homo sapiens OX=9606 GN=C8orf33 PE=1 SV=1;tr|A0A3B3IT54|A0A3B3IT54_HUMAN Isoform of Q9H7E9, UPF0488 protein C8orf33 OS=Homo sapiens OX=9606 GN=C8orf33 PE=1 SV=1;tr|A0A3B3ITA3|A0A3	5	2	2	2	1	1	1	0	1	1	1	0	1	1	1	0	17.3	17.3	17.3	24.465	226	226;236;248;229;242	0	4.9759	0.83938	1.1144	18.781	2	0	Median	1.3262	NaN	0.53125	NaN	1.2726	NaN	0.97577	NaN
SHMT1	Serine hydroxymethyltransferase, cytosolic	1.274	NaN	NaN	NaN	P34896-4;P34896-2;P34896	P34896-4;P34896-2;P34896	2;2;2	1;1;1	1;1;1	sp|P34896-4|GLYC-4_HUMAN Isoform of P34896, Isoform 4 of Serine hydroxymethyltransferase, cytosolic OS=Homo sapiens OX=9606 GN=SHMT1 PE=1 SV=1;sp|P34896-2|GLYC-2_HUMAN Isoform of P34896, Isoform 2 of Serine hydroxymethyltransferase, cytosolic OS=Homo sapie	3	2	1	1	2	1	1	1	1	0	0	0	1	0	0	0	7.5	3.5	3.5	37.672	345	345;444;483	0.0079681	1.5754	1.3918	1.274	NaN	1	0	Median	1.3918	NaN	NaN	NaN	1.274	NaN	NaN	NaN
EHD4	EH domain-containing protein 4	1.2753	NaN	0.73023	NaN	Q9H223	Q9H223	2	2	2	sp|Q9H223|EHD4_HUMAN EH domain-containing protein 4 OS=Homo sapiens OX=9606 GN=EHD4 PE=1 SV=1	1	2	2	2	1	0	1	0	1	0	1	0	1	0	1	0	4.8	4.8	4.8	61.174	541	541	0	4.7577	0.8591	0.96501	39.425	2	1	Median	1.3116	NaN	0.5627	NaN	1.2753	NaN	0.73023	NaN
ANAPC4	Anaphase-promoting complex subunit 4	1.282	NaN	NaN	NaN	Q9UJX5-2;Q9UJX5;Q9UJX5-3	Q9UJX5-2;Q9UJX5;Q9UJX5-3	1;1;1	1;1;1	1;1;1	sp|Q9UJX5-2|APC4-2_HUMAN Isoform of Q9UJX5, Isoform 2 of Anaphase-promoting complex subunit 4 OS=Homo sapiens OX=9606 GN=ANAPC4 PE=1 SV=2;sp|Q9UJX5|APC4_HUMAN Anaphase-promoting complex subunit 4 OS=Homo sapiens OX=9606 GN=ANAPC4 PE=1 SV=2;sp|Q9UJX5-3|APC4	3	1	1	1	1	0	0	0	1	0	0	0	1	0	0	0	2	2	2	62.639	551	551;808;809	0.007286	1.6032	1.4002	1.282	NaN	1	0	Median	1.4002	NaN	NaN	NaN	1.282	NaN	NaN	NaN
EMD	Emerin	1.2872	NaN	0.75269	NaN	Q5HY57;P50402	Q5HY57;P50402	1;1	1;1	1;1	tr|Q5HY57|Q5HY57_HUMAN Isoform of P50402, Emerin OS=Homo sapiens OX=9606 GN=EMD PE=1 SV=1;sp|P50402|EMD_HUMAN Emerin OS=Homo sapiens OX=9606 GN=EMD PE=1 SV=1	2	1	1	1	1	0	1	0	1	0	1	0	1	0	1	0	7.8	7.8	7.8	24.938	219	219;254	0.0041431	1.8691	0.88808	0.9843	37.94	2	0	Median	1.2743	NaN	0.61894	NaN	1.2872	NaN	0.75269	NaN
MRPL33	39S ribosomal protein L33, mitochondrial	1.2874	NaN	1.1605	NaN	O75394	O75394	1	1	1	sp|O75394|RM33_HUMAN 39S ribosomal protein L33, mitochondrial OS=Homo sapiens OX=9606 GN=MRPL33 PE=1 SV=1	1	1	1	1	1	0	1	0	1	0	1	0	1	0	1	0	16.9	16.9	16.9	7.6191	65	65	0.00081533	2.4324	0.91148	1.2223	7.3402	2	1	Median	1.2988	NaN	0.63966	NaN	1.2874	NaN	1.1605	NaN
PAFAH1B1	Platelet-activating factor acetylhydrolase IB subunit alpha	1.2911	NaN	1.1195	NaN	P43034;I3L495;I3L3N5	P43034	3;1;1	3;1;1	3;1;1	sp|P43034|LIS1_HUMAN Platelet-activating factor acetylhydrolase IB subunit alpha OS=Homo sapiens OX=9606 GN=PAFAH1B1 PE=1 SV=2	3	3	3	3	2	0	3	0	2	0	3	0	2	0	3	0	10.7	10.7	10.7	46.637	410	410;82;208	0	4.8173	1.0752	1.2023	8.7339	4	0	Leave out requantified	1.4099	NaN	0.81987	NaN	1.2911	NaN	1.1195	NaN
TPD52	Tumor protein D52	1.2921	NaN	1.4015	NaN	H0YC42;P55327-2;P55327-4;P55327;P55327-7;P55327-5;P55327-6;P55327-3	H0YC42;P55327-2;P55327-4;P55327;P55327-7;P55327-5;P55327-6;P55327-3	2;1;1;1;1;1;1;1	1;1;1;1;1;1;1;1	1;1;1;1;1;1;1;1	tr|H0YC42|H0YC42_HUMAN Uncharacterized protein OS=Homo sapiens OX=9606 PE=4 SV=2;sp|P55327-2|TPD52-2_HUMAN Isoform of P55327, Isoform 2 of Tumor protein D52 OS=Homo sapiens OX=9606 GN=TPD52 PE=1 SV=2;sp|P55327-4|TPD52-4_HUMAN Isoform of P55327, Isoform 4 o	8	2	1	1	1	1	1	1	1	0	1	0	1	0	1	0	8.6	5	5	31.17	278	278;184;207;224;233;238;247;248	0.0023112	2.0214	1.0414	1.3457	5.7464	2	0	Median	1.3275	NaN	0.81699	NaN	1.2921	NaN	1.4015	NaN
GADD45GIP1	Growth arrest and DNA damage-inducible proteins-interacting protein 1	1.3046	NaN	NaN	NaN	Q8TAE8	Q8TAE8	2	2	2	sp|Q8TAE8|G45IP_HUMAN Growth arrest and DNA damage-inducible proteins-interacting protein 1 OS=Homo sapiens OX=9606 GN=GADD45GIP1 PE=1 SV=1	1	2	2	2	2	1	0	1	2	1	0	1	2	1	0	1	14	14	14	25.384	222	222	0.00044524	3.3944	1.3146	1.3046	NaN	1	0	Median	1.3146	NaN	NaN	NaN	1.3046	NaN	NaN	NaN
PSME4	Proteasome activator complex subunit 4	1.322	NaN	0.90295	NaN	Q14997;F8WBH5;Q14997-2;Q14997-3	Q14997;F8WBH5;Q14997-2	6;3;3;2	6;3;3;2	6;3;3;2	sp|Q14997|PSME4_HUMAN Proteasome activator complex subunit 4 OS=Homo sapiens OX=9606 GN=PSME4 PE=1 SV=2;tr|F8WBH5|F8WBH5_HUMAN Isoform of Q14997, Proteasome activator complex subunit 4 OS=Homo sapiens OX=9606 GN=PSME4 PE=1 SV=1;sp|Q14997-2|PSME4-2_HUMAN Is	4	6	6	6	5	0	3	0	5	0	3	0	5	0	3	0	4.6	4.6	4.6	211.33	1843	1843;571;1218;987	0	10.724	1.3207	1.3358	9.1825	8	3	Leave out requantified	1.3591	NaN	0.5917	NaN	1.322	NaN	0.90295	NaN
AP1B1	AP-1 complex subunit beta-1	1.3308	NaN	1.1344	NaN	Q10567-4;Q10567-3;Q10567-2;Q10567;C9J1E7	Q10567-4;Q10567-3;Q10567-2;Q10567;C9J1E7	10;10;10;10;7	2;2;2;2;1	2;2;2;2;1	sp|Q10567-4|AP1B1-4_HUMAN Isoform of Q10567, Isoform 4 of AP-1 complex subunit beta-1 OS=Homo sapiens OX=9606 GN=AP1B1 PE=1 SV=2;sp|Q10567-3|AP1B1-3_HUMAN Isoform of Q10567, Isoform C of AP-1 complex subunit beta-1 OS=Homo sapiens OX=9606 GN=AP1B1 PE=1 SV=	5	10	2	2	9	3	6	6	1	0	1	0	1	0	1	0	12.4	2.3	2.3	101.35	919	919;939;942;949;578	0.00082747	2.5461	1.0145	1.2287	11.288	2	0	Median	1.459	NaN	0.70535	NaN	1.3308	NaN	1.1344	NaN
API5	Apoptosis inhibitor 5	1.332	NaN	0.96492	NaN	G3V1C3;Q9BZZ5-3;Q9BZZ5-2;Q9BZZ5-6;Q9BZZ5;E9PQK6;Q9BZZ5-1;Q9BZZ5-5	G3V1C3;Q9BZZ5-3;Q9BZZ5-2;Q9BZZ5-6;Q9BZZ5;E9PQK6;Q9BZZ5-1;Q9BZZ5-5	2;2;2;2;2;1;1;1	2;2;2;2;2;1;1;1	2;2;2;2;2;1;1;1	tr|G3V1C3|G3V1C3_HUMAN Isoform of Q9BZZ5, Apoptosis inhibitor 5 OS=Homo sapiens OX=9606 GN=API5 PE=1 SV=1;sp|Q9BZZ5-3|API5-3_HUMAN Isoform of Q9BZZ5, Isoform 3 of Apoptosis inhibitor 5 OS=Homo sapiens OX=9606 GN=API5 PE=1 SV=3;sp|Q9BZZ5-2|API5-2_HUMAN Isof	8	2	2	2	1	0	1	0	1	0	1	0	1	0	1	0	4.7	4.7	4.7	57.56	510	510;445;504;513;524;123;438;450	0.00043478	3.1203	0.97969	1.1337	22.797	2	0	Median	1.4432	NaN	0.66505	NaN	1.332	NaN	0.96492	NaN
SSSCA1	Sjoegren syndrome/scleroderma autoantigen 1	1.3454	NaN	1.355	NaN	E9PN57;H0YEK1;G3V1B8;H0YEB6;O60232	E9PN57;H0YEK1;G3V1B8;H0YEB6;O60232	1;1;1;1;1	1;1;1;1;1	1;1;1;1;1	tr|E9PN57|E9PN57_HUMAN Isoform of O60232, Zinc ribbon domain-containing 2 OS=Homo sapiens OX=9606 GN=ZNRD2 PE=1 SV=1;tr|H0YEK1|H0YEK1_HUMAN Isoform of O60232, Zinc ribbon domain-containing 2 (Fragment) OS=Homo sapiens OX=9606 GN=ZNRD2 PE=1 SV=1;tr|G3V1B8|G	5	1	1	1	1	0	1	1	1	0	1	1	1	0	1	1	28.3	28.3	28.3	6.7918	60	60;107;162;193;199	0	15.927	1.1631	1.3454	33.066	3	2	Median	1.3888	NaN	0.82523	NaN	1.3454	NaN	1.355	NaN
NME1	Nucleoside diphosphate kinase A	1.3575	NaN	1.4314	NaN	P15531;P15531-2	P15531;P15531-2	7;7	1;1	1;1	sp|P15531|NDKA_HUMAN Nucleoside diphosphate kinase A OS=Homo sapiens OX=9606 GN=NME1 PE=1 SV=1;sp|P15531-2|NDKA-2_HUMAN Isoform of P15531, Isoform 2 of Nucleoside diphosphate kinase A OS=Homo sapiens OX=9606 GN=NME1 PE=1 SV=1	2	7	1	1	4	5	6	4	1	1	1	0	1	1	1	0	52	9.2	9.2	17.149	152	152;177	0.00042863	2.9329	1.1305	1.394	3.7497	2	1	Median	1.3699	NaN	0.93291	NaN	1.3575	NaN	1.4314	NaN
TXLNA	Alpha-taxilin	1.3611	NaN	NaN	NaN	P40222	P40222	3	3	3	sp|P40222|TXLNA_HUMAN Alpha-taxilin OS=Homo sapiens OX=9606 GN=TXLNA PE=1 SV=3	1	3	3	3	3	1	0	1	3	1	0	1	3	1	0	1	15.2	15.2	15.2	61.89	546	546	0	51.345	1.4693	1.3611	NaN	1	1	Median	1.4693	NaN	NaN	NaN	1.3611	NaN	NaN	NaN
		1.3648	NaN	NaN	NaN	REV__A0A0G2JS52;REV__Q01538;REV__Q01538-2	REV__A0A0G2JS52;REV__Q01538;REV__Q01538-2	1;1;1	1;1;1	1;1;1	tr|A0A0G2JS52|A0A0G2JS52_HUMAN Uncharacterized protein (Fragment) OS=Homo sapiens OX=9606 PE=4 SV=1;sp|Q01538|MYT1_HUMAN Myelin transcription factor 1 OS=Homo sapiens OX=9606 GN=MYT1 PE=1 SV=2;sp|Q01538-2|MYT1-2_HUMAN Isoform of Q01538, Isoform 2 of Myelin	3	1	1	1	1	0	0	0	1	0	0	0	1	0	0	0	0	0	0	90.662	829	829;1121;1148	0.0083273	1.5733	1.3893	1.3648	NaN	1	0	Median	1.3893	NaN	NaN	NaN	1.3648	NaN	NaN	NaN
SAMD11	Sterile alpha motif domain-containing protein 11	1.3706	NaN	0.78166	NaN	H7BY14;A0A087WYU3;Q96NU1-6;Q96NU1;I7G285;H7C3J6;A0A087WXB3;A0A087X223;A0A087X1J5;A0A087WYW1;Q96NU1-1;Q96NU1-2;Q96NU1-4;Q96NU1-5	H7BY14;A0A087WYU3;Q96NU1-6;Q96NU1;I7G285;H7C3J6;A0A087WXB3;A0A087X223;A0A087X1J5;A0A087WYW1;Q96NU1-1;Q96NU1-2;Q96NU1-4;Q96NU1-5	2;2;2;2;1;1;1;1;1;1;1;1;1;1	2;2;2;2;1;1;1;1;1;1;1;1;1;1	2;2;2;2;1;1;1;1;1;1;1;1;1;1	tr|H7BY14|H7BY14_HUMAN Isoform of Q96NU1, Sterile alpha motif domain-containing protein 11 (Fragment) OS=Homo sapiens OX=9606 GN=SAMD11 PE=1 SV=1;tr|A0A087WYU3|A0A087WYU3_HUMAN Isoform of Q96NU1, Sterile alpha motif domain-containing protein 11 OS=Homo sap	14	2	2	2	1	0	1	0	1	0	1	0	1	0	1	0	3.6	3.6	3.6	62.773	589	589;601;665;681;345;541;556;573;619;682;480;529;666;699	0.00043085	2.9902	0.88014	1.035	39.709	2	0	Median	1.3806	NaN	0.56109	NaN	1.3706	NaN	0.78166	NaN
DNM1L	Dynamin-1-like protein	1.376	NaN	0.75464	NaN	G8JLD5;O00429-4;O00429-5;O00429-3;O00429-2;O00429;O00429-8;O00429-6;F8VR28;F8VYL3;B4DPZ9;F8W1W3;F8VUJ9;B4DDQ3;F8VZ52;O00429-7	G8JLD5;O00429-4;O00429-5;O00429-3;O00429-2;O00429;O00429-8;O00429-6;F8VR28;F8VYL3;B4DPZ9;F8W1W3;F8VUJ9;B4DDQ3;F8VZ52;O00429-7	2;2;2;2;2;2;2;2;1;1;1;1;1;1;1;1	2;2;2;2;2;2;2;2;1;1;1;1;1;1;1;1	2;2;2;2;2;2;2;2;1;1;1;1;1;1;1;1	tr|G8JLD5|G8JLD5_HUMAN Isoform of O00429, Dynamin-1-like protein OS=Homo sapiens OX=9606 GN=DNM1L PE=1 SV=1;sp|O00429-4|DNM1L-4_HUMAN Isoform of O00429, Isoform 3 of Dynamin-1-like protein OS=Homo sapiens OX=9606 GN=DNM1L PE=1 SV=2;sp|O00429-5|DNM1L-5_HUMA	16	2	2	2	2	0	1	0	2	0	1	0	2	0	1	0	2.8	2.8	2.8	79.621	712	712;699;710;710;725;736;738;749;97;117;156;168;172;180;261;533	0.0023139	2.0242	1.4354	1.3689	34.686	3	0	Median	1.4847	NaN	0.52008	NaN	1.376	NaN	0.75464	NaN
GSTK1	Glutathione S-transferase kappa 1	1.3924	NaN	2.7919	NaN	E9PFN5;Q9Y2Q3-4;Q9Y2Q3;Q9Y2Q3-3;Q9Y2Q3-2	E9PFN5;Q9Y2Q3-4;Q9Y2Q3;Q9Y2Q3-3;Q9Y2Q3-2	2;2;2;1;1	2;2;2;1;1	2;2;2;1;1	tr|E9PFN5|E9PFN5_HUMAN Isoform of Q9Y2Q3, Glutathione S-transferase kappa OS=Homo sapiens OX=9606 GN=GSTK1 PE=1 SV=1;sp|Q9Y2Q3-4|GSTK1-4_HUMAN Isoform of Q9Y2Q3, Isoform 4 of Glutathione S-transferase kappa 1 OS=Homo sapiens OX=9606 GN=GSTK1 PE=1 SV=3;sp|Q	5	2	2	2	2	1	1	0	2	1	1	0	2	1	1	0	15.8	15.8	15.8	21.707	190	190;183;226;214;282	0.00043956	3.2665	1.6453	1.6621	43.894	3	2	Median	1.4366	NaN	1.6453	NaN	1.3924	NaN	2.7919	NaN
ADI1	1,2-dihydroxy-3-keto-5-methylthiopentene dioxygenase	1.3989	NaN	NaN	NaN	Q9BV57	Q9BV57	1	1	1	sp|Q9BV57|MTND_HUMAN 1,2-dihydroxy-3-keto-5-methylthiopentene dioxygenase OS=Homo sapiens OX=9606 GN=ADI1 PE=1 SV=1	1	1	1	1	1	0	0	0	1	0	0	0	1	0	0	0	7.8	7.8	7.8	21.498	179	179	0.0038037	1.9317	1.4096	1.3989	NaN	1	0	Median	1.4096	NaN	NaN	NaN	1.3989	NaN	NaN	NaN
		1.4017	NaN	NaN	NaN	REV__O76031	REV__O76031	1	1	1	sp|O76031|CLPX_HUMAN ATP-dependent Clp protease ATP-binding subunit clpX-like, mitochondrial OS=Homo sapiens OX=9606 GN=CLPX PE=1 SV=2	1	1	1	1	1	0	0	0	1	0	0	0	1	0	0	0	0	0	0	69.223	633	633	0.0079797	1.5787	1.4998	1.4017	NaN	1	0	Median	1.4998	NaN	NaN	NaN	1.4017	NaN	NaN	NaN
GLTP	Glycolipid transfer protein	1.402	NaN	1.1755	NaN	F5GZ49;F5H0U5;Q9NZD2	F5GZ49;F5H0U5;Q9NZD2	1;1;1	1;1;1	1;1;1	tr|F5GZ49|F5GZ49_HUMAN Isoform of Q9NZD2, Glycolipid transfer protein OS=Homo sapiens OX=9606 GN=GLTP PE=1 SV=1;tr|F5H0U5|F5H0U5_HUMAN Isoform of Q9NZD2, Glycolipid transfer protein OS=Homo sapiens OX=9606 GN=GLTP PE=1 SV=1;sp|Q9NZD2|GLTP_HUMAN Glycolipid	3	1	1	1	1	0	1	0	1	0	1	0	1	0	1	0	22.4	22.4	22.4	7.2826	67	67;190;209	0.00084746	2.8094	1.016	1.2838	12.456	2	0	Median	1.4126	NaN	0.73066	NaN	1.402	NaN	1.1755	NaN
NDUFS7	NADH dehydrogenase [ubiquinone] iron-sulfur protein 7, mitochondrial	1.4121	NaN	NaN	NaN	F5H5N1;A0A087WXF6;A0A087WTI3;F5GXJ1;O75251-2;O75251	F5H5N1;A0A087WXF6;A0A087WTI3;F5GXJ1;O75251-2;O75251	1;1;1;1;1;1	1;1;1;1;1;1	1;1;1;1;1;1	tr|F5H5N1|F5H5N1_HUMAN Isoform of O75251, NADH dehydrogenase [ubiquinone] iron-sulfur protein 7, mitochondrial OS=Homo sapiens OX=9606 GN=NDUFS7 PE=1 SV=1;tr|A0A087WXF6|A0A087WXF6_HUMAN Isoform of O75251, NADH dehydrogenase [ubiquinone] iron-sulfur protein	6	1	1	1	1	1	0	0	1	1	0	0	1	1	0	0	7.7	7.7	7.7	19.77	182	182;214;214;236;206;213	0.00084998	2.8367	1.4552	1.4121	NaN	1	0	Median	1.4552	NaN	NaN	NaN	1.4121	NaN	NaN	NaN
CAB39	Calcium-binding protein 39	1.4179	NaN	NaN	NaN	A0A087X0K1;Q9Y376	A0A087X0K1;Q9Y376	2;2	2;2	2;2	tr|A0A087X0K1|A0A087X0K1_HUMAN Isoform of Q9Y376, Calcium-binding protein 39 OS=Homo sapiens OX=9606 GN=CAB39 PE=1 SV=1;sp|Q9Y376|CAB39_HUMAN Calcium-binding protein 39 OS=Homo sapiens OX=9606 GN=CAB39 PE=1 SV=1	2	2	2	2	1	0	1	0	1	0	1	0	1	0	1	0	5.9	5.9	5.9	39.452	339	339;341	0.0073153	1.6237	1.4601	1.4179	NaN	1	0	Median	1.4601	NaN	NaN	NaN	1.4179	NaN	NaN	NaN
GSS	Glutathione synthetase	1.421	NaN	1.042	NaN	A0A2R8Y2F2;A0A2R8Y2X9;A0A2R8Y6Y6;A0A2R8Y4V9;A0A2R8Y790;A0A2R8Y446;A0A0S2Z4J7;A0A2R8YF34;A0A2R8Y430;P48637-2;P48637	A0A2R8Y2F2;A0A2R8Y2X9;A0A2R8Y6Y6;A0A2R8Y4V9;A0A2R8Y790;A0A2R8Y446;A0A0S2Z4J7;A0A2R8YF34;A0A2R8Y430;P48637-2;P48637	1;1;1;1;1;1;1;1;1;1;1	1;1;1;1;1;1;1;1;1;1;1	1;1;1;1;1;1;1;1;1;1;1	tr|A0A2R8Y2F2|A0A2R8Y2F2_HUMAN Isoform of P48637, Glutathione synthetase (Fragment) OS=Homo sapiens OX=9606 GN=GSS PE=1 SV=1;tr|A0A2R8Y2X9|A0A2R8Y2X9_HUMAN Isoform of P48637, Glutathione synthetase OS=Homo sapiens OX=9606 GN=GSS PE=1 SV=1;tr|A0A2R8Y6Y6|A0A	11	1	1	1	1	0	1	0	1	0	1	0	1	0	1	0	36.7	36.7	36.7	3.3427	30	30;48;81;97;112;124;132;134;450;363;474	0.0066642	1.6964	1.138	1.2168	21.937	2	0	Median	1.5262	NaN	0.84859	NaN	1.421	NaN	1.042	NaN
RTN3	Reticulon-3;Reticulon	1.421	NaN	NaN	NaN	O95197-3;O95197-4;O95197-7;O95197-2;O95197;B7Z4M1;F5H891;F5GWG7;F5H617;O95197-6;O95197-5	O95197-3;O95197-4;O95197-7;O95197-2;O95197;B7Z4M1;F5H891;F5GWG7;F5H617;O95197-6;O95197-5	2;2;2;2;2;1;1;1;1;1;1	2;2;2;2;2;1;1;1;1;1;1	2;2;2;2;2;1;1;1;1;1;1	sp|O95197-3|RTN3-3_HUMAN Isoform of O95197, Isoform 3 of Reticulon-3 OS=Homo sapiens OX=9606 GN=RTN3 PE=1 SV=2;sp|O95197-4|RTN3-4_HUMAN Isoform of O95197, Isoform 4 of Reticulon-3 OS=Homo sapiens OX=9606 GN=RTN3 PE=1 SV=2;sp|O95197-7|RTN3-7_HUMAN Isoform o	11	2	2	2	2	0	0	0	2	0	0	0	2	0	0	0	21.2	21.2	21.2	25.609	236	236;255;920;1013;1032;123;130;136;185;214;241	0	7.5363	1.4123	1.421	NaN	1	0	Median	1.4123	NaN	NaN	NaN	1.421	NaN	NaN	NaN
EDF1	Endothelial differentiation-related factor 1	1.4261	NaN	1.0836	NaN	O60869-2;O60869-3;O60869	O60869-2;O60869-3;O60869	1;1;1	1;1;1	1;1;1	sp|O60869-2|EDF1-2_HUMAN Isoform of O60869, Isoform 2 of Endothelial differentiation-related factor 1 OS=Homo sapiens OX=9606 GN=EDF1 PE=1 SV=1;sp|O60869-3|EDF1-3_HUMAN Isoform of O60869, Isoform 3 of Endothelial differentiation-related factor 1 OS=Homo sa	3	1	1	1	1	0	1	0	1	0	1	0	1	0	1	0	8.6	8.6	8.6	15.48	139	139;141;148	0.0092791	1.49	1.0877	1.2431	19.417	2	1	Median	1.4352	NaN	0.82439	NaN	1.4261	NaN	1.0836	NaN
TAGLN2	Transgelin-2	1.4308	NaN	1.1585	NaN	X6RJP6;P37802;P37802-2	X6RJP6;P37802;P37802-2	2;2;2	2;2;2	2;2;2	tr|X6RJP6|X6RJP6_HUMAN Isoform of P37802, Transgelin-2 (Fragment) OS=Homo sapiens OX=9606 GN=TAGLN2 PE=1 SV=1;sp|P37802|TAGL2_HUMAN Transgelin-2 OS=Homo sapiens OX=9606 GN=TAGLN2 PE=1 SV=3;sp|P37802-2|TAGL2-2_HUMAN Isoform of P37802, Isoform 2 of Transgeli	3	2	2	2	2	0	1	0	2	0	1	0	2	0	1	0	13.9	13.9	13.9	21.086	187	187;199;220	0.00082406	2.5187	1.1212	1.2875	14.925	2	1	Median	1.4398	NaN	0.87319	NaN	1.4308	NaN	1.1585	NaN
SPAG5	Sperm-associated antigen 5	1.4518	NaN	NaN	NaN	Q96R06;K7ELG0;K7ELC8;E9PMD0	Q96R06	3;1;1;1	3;1;1;1	3;1;1;1	sp|Q96R06|SPAG5_HUMAN Sperm-associated antigen 5 OS=Homo sapiens OX=9606 GN=SPAG5 PE=1 SV=2	4	3	3	3	3	1	0	1	3	1	0	1	3	1	0	1	3	3	3	134.42	1193	1193;185;186;336	0.0008489	2.8145	1.573	1.4518	35.995	3	1	Plateau	1.573	NaN	NaN	NaN	1.4518	NaN	NaN	NaN
GNPDA1	Glucosamine-6-phosphate isomerase;Glucosamine-6-phosphate isomerase 1	1.4524	NaN	1.7553	NaN	D6RAY7;D6R9P4;P46926-2;P46926;D6R917;D6RB13;D6RFF8;Q8TDQ7-3;Q8TDQ7-2;Q8TDQ7	D6RAY7;D6R9P4;P46926-2;P46926;D6R917;D6RB13;D6RFF8	3;3;3;3;2;2;2;1;1;1	3;3;3;3;2;2;2;1;1;1	3;3;3;3;2;2;2;1;1;1	tr|D6RAY7|D6RAY7_HUMAN Isoform of P46926, Glucosamine-6-phosphate isomerase (Fragment) OS=Homo sapiens OX=9606 GN=GNPDA1 PE=1 SV=1;tr|D6R9P4|D6R9P4_HUMAN Isoform of P46926, Glucosamine-6-phosphate isomerase OS=Homo sapiens OX=9606 GN=GNPDA1 PE=1 SV=1;sp|P4	10	3	3	3	2	0	2	0	2	0	2	0	2	0	2	0	16.5	16.5	16.5	26.987	237	237;274;212;289;138;160;290;259;275;276	0	4.7146	1.2826	1.7406	21.147	3	0	Median	1.5162	NaN	1.0354	NaN	1.4524	NaN	1.7553	NaN
CHAF1A	Chromatin assembly factor 1 subunit A	1.4721	NaN	NaN	NaN	Q13111;K7EJF1;Q13111-2;Q13111-3	Q13111	3;1;1;1	3;1;1;1	3;1;1;1	sp|Q13111|CAF1A_HUMAN Chromatin assembly factor 1 subunit A OS=Homo sapiens OX=9606 GN=CHAF1A PE=1 SV=3	4	3	3	3	3	1	0	0	3	1	0	0	3	1	0	0	5.6	5.6	5.6	106.91	956	956;151;749;783	0	3.9408	1.5945	1.4721	NaN	1	1	Median	1.5945	NaN	NaN	NaN	1.4721	NaN	NaN	NaN
UBE2N;UBE2NL	Ubiquitin-conjugating enzyme E2 N;Putative ubiquitin-conjugating enzyme E2 N-like	1.5183	NaN	2.0629	NaN	P61088;F8VZ29;F8VQQ8;F8VSD4;F8VV71;Q5JXB2	P61088;F8VZ29;F8VQQ8;F8VSD4;F8VV71;Q5JXB2	2;1;1;1;1;1	2;1;1;1;1;1	2;1;1;1;1;1	sp|P61088|UBE2N_HUMAN Ubiquitin-conjugating enzyme E2 N OS=Homo sapiens OX=9606 GN=UBE2N PE=1 SV=1;tr|F8VZ29|F8VZ29_HUMAN Isoform of P61088, Ubiquitin-conjugating enzyme E2 N OS=Homo sapiens OX=9606 GN=UBE2N PE=1 SV=1;tr|F8VQQ8|F8VQQ8_HUMAN Isoform of P610	6	2	2	2	2	0	1	0	2	0	1	0	2	0	1	0	17.1	17.1	17.1	17.138	152	152;87;89;105;152;153	0	4.7112	1.4426	1.6017	18.487	3	0	Median	1.5181	NaN	1.0746	NaN	1.5183	NaN	2.0629	NaN
RANBP3	Ran-binding protein 3	1.5454	NaN	1.139	NaN	K7ENJ2;K7EID7;K7ENB9;K7EPW1;B7Z7F3;Q9H6Z4-3;Q9H6Z4-2;Q9H6Z4	K7ENJ2;K7EID7;K7ENB9;K7EPW1;B7Z7F3;Q9H6Z4-3;Q9H6Z4-2;Q9H6Z4	1;1;1;1;1;1;1;1	1;1;1;1;1;1;1;1	1;1;1;1;1;1;1;1	tr|K7ENJ2|K7ENJ2_HUMAN Isoform of Q9H6Z4, Ran-binding protein 3 OS=Homo sapiens OX=9606 GN=RANBP3 PE=1 SV=1;tr|K7EID7|K7EID7_HUMAN Isoform of Q9H6Z4, Ran-binding protein 3 OS=Homo sapiens OX=9606 GN=RANBP3 PE=1 SV=1;tr|K7ENB9|K7ENB9_HUMAN Isoform of Q9H6Z4	8	1	1	1	1	0	1	0	1	0	1	0	1	0	1	0	32.3	32.3	32.3	6.8119	62	62;73;74;108;494;499;562;567	0.00043725	3.1803	1.1651	1.3267	21.577	2	0	Median	1.623	NaN	0.83639	NaN	1.5454	NaN	1.139	NaN
TIMELESS	Protein timeless homolog	1.5489	NaN	1.7448	NaN	Q9UNS1-2;Q9UNS1	Q9UNS1-2;Q9UNS1	2;2	2;2	2;2	sp|Q9UNS1-2|TIM-2_HUMAN Isoform of Q9UNS1, Isoform 2 of Protein timeless homolog OS=Homo sapiens OX=9606 GN=TIMELESS PE=1 SV=2;sp|Q9UNS1|TIM_HUMAN Protein timeless homolog OS=Homo sapiens OX=9606 GN=TIMELESS PE=1 SV=2	2	2	2	2	1	0	1	0	1	0	1	0	1	0	1	0	1.8	1.8	1.8	138.53	1207	1207;1208	0.005218	1.7798	1.3819	1.6439	8.4185	2	0	Median	1.6394	NaN	1.1649	NaN	1.5489	NaN	1.7448	NaN
UGDH	UDP-glucose 6-dehydrogenase	1.5497	NaN	1.7169	NaN	O60701-2;O60701;O60701-3;E7ER95;E7ER83;E7ETF4;E7EV97	O60701-2;O60701;O60701-3	4;4;3;1;1;1;1	4;4;3;1;1;1;1	4;4;3;1;1;1;1	sp|O60701-2|UGDH-2_HUMAN Isoform of O60701, Isoform 2 of UDP-glucose 6-dehydrogenase OS=Homo sapiens OX=9606 GN=UGDH PE=1 SV=1;sp|O60701|UGDH_HUMAN UDP-glucose 6-dehydrogenase OS=Homo sapiens OX=9606 GN=UGDH PE=1 SV=1;sp|O60701-3|UGDH-3_HUMAN Isoform of O6	7	4	4	4	1	0	3	0	1	0	3	0	1	0	3	0	12.2	12.2	12.2	47.602	427	427;494;397;84;130;153;181	0	7.4557	1.3634	1.6312	13.801	4	0	Leave out requantified	1.6505	NaN	1.3243	NaN	1.5497	NaN	1.7169	NaN
SETD3	Histone-lysine N-methyltransferase setd3	1.5576	NaN	0.54228	NaN	Q86TU7;Q6NXR6;Q86TU7-3;Q86TU7-2;C9K0W5	Q86TU7;Q6NXR6;Q86TU7-3;Q86TU7-2	3;2;2;2;1	3;2;2;2;1	3;2;2;2;1	sp|Q86TU7|SETD3_HUMAN Actin-histidine N-methyltransferase OS=Homo sapiens OX=9606 GN=SETD3 PE=1 SV=1;tr|Q6NXR6|Q6NXR6_HUMAN Isoform of Q86TU7, Actin-histidine N-methyltransferase OS=Homo sapiens OX=9606 GN=SETD3 PE=1 SV=1;sp|Q86TU7-3|SETD3-3_HUMAN Isoform	5	3	3	3	1	0	3	0	1	0	3	0	1	0	3	0	6.6	6.6	6.6	67.256	594	594;292;284;296;81	0	5.9576	0.42484	0.59215	61.552	3	0	Median	1.6597	NaN	0.39997	NaN	1.5576	NaN	0.54228	NaN
GLO1	Lactoylglutathione lyase	1.5748	NaN	1.9831	NaN	Q04760-2;Q04760	Q04760-2;Q04760	2;2	2;2	2;2	sp|Q04760-2|LGUL-2_HUMAN Isoform of Q04760, Isoform 2 of Lactoylglutathione lyase OS=Homo sapiens OX=9606 GN=GLO1 PE=1 SV=4;sp|Q04760|LGUL_HUMAN Lactoylglutathione lyase OS=Homo sapiens OX=9606 GN=GLO1 PE=1 SV=4	2	2	2	2	2	0	2	0	2	0	2	0	2	0	2	0	11.2	11.2	11.2	19.043	169	169;184	0	3.4287	1.2571	1.7672	1.1292	4	0	Leave out requantified	1.585	NaN	0.99706	NaN	1.5748	NaN	1.9831	NaN
AP4E1	AP-4 complex subunit epsilon-1	1.5751	NaN	NaN	NaN	H0YK95;H0YL95;Q9UPM8	H0YK95;H0YL95;Q9UPM8	1;1;1	1;1;1	1;1;1	tr|H0YK95|H0YK95_HUMAN Isoform of Q9UPM8, AP-4 complex subunit epsilon-1 OS=Homo sapiens OX=9606 GN=AP4E1 PE=1 SV=1;tr|H0YL95|H0YL95_HUMAN Isoform of Q9UPM8, AP-4 complex subunit epsilon-1 OS=Homo sapiens OX=9606 GN=AP4E1 PE=1 SV=1;sp|Q9UPM8|AP4E1_HUMAN AP	3	1	1	1	1	0	0	0	1	0	0	0	1	0	0	0	6.9	6.9	6.9	35.794	321	321;368;1137	0.0098696	1.4221	1.6939	1.5751	NaN	1	0	Median	1.6939	NaN	NaN	NaN	1.5751	NaN	NaN	NaN
UBE2K	Ubiquitin-conjugating enzyme E2 K	1.5807	NaN	1.5111	NaN	P61086;D6RDM7;P61086-2;P61086-3	P61086;D6RDM7;P61086-2;P61086-3	2;1;1;1	2;1;1;1	2;1;1;1	sp|P61086|UBE2K_HUMAN Ubiquitin-conjugating enzyme E2 K OS=Homo sapiens OX=9606 GN=UBE2K PE=1 SV=3;tr|D6RDM7|D6RDM7_HUMAN Isoform of P61086, Ubiquitin-conjugating enzyme E2 K (Fragment) OS=Homo sapiens OX=9606 GN=UBE2K PE=1 SV=1;sp|P61086-2|UBE2K-2_HUMAN I	4	2	2	2	1	0	1	0	1	0	1	0	1	0	1	0	11	11	11	22.406	200	200;123;149;157	0.0019755	2.2054	1.1788	1.5455	3.1838	2	0	Median	1.5998	NaN	0.86865	NaN	1.5807	NaN	1.5111	NaN
NCEH1	Neutral cholesterol ester hydrolase 1	1.5966	NaN	1.5413	NaN	A0A0R4J2G3;A0A0A0MTJ9;Q6PIU2-3;Q6PIU2;Q6PIU2-2	A0A0R4J2G3;A0A0A0MTJ9;Q6PIU2-3;Q6PIU2;Q6PIU2-2	1;1;1;1;1	1;1;1;1;1	1;1;1;1;1	tr|A0A0R4J2G3|A0A0R4J2G3_HUMAN Isoform of Q6PIU2, Arylacetamide deacetylase-like 1 OS=Homo sapiens OX=9606 GN=NCEH1 PE=1 SV=1;tr|A0A0A0MTJ9|A0A0A0MTJ9_HUMAN Isoform of Q6PIU2, Neutral cholesterol ester hydrolase 1 OS=Homo sapiens OX=9606 GN=NCEH1 PE=1 SV=1	5	1	1	1	1	0	1	0	1	0	1	0	1	0	1	0	2.7	2.7	2.7	49.062	440	440;448;275;408;416	0.0048671	1.8118	1.4088	1.5687	2.4938	2	0	Median	1.6687	NaN	1.1894	NaN	1.5966	NaN	1.5413	NaN
		1.614	NaN	NaN	NaN	REV__H0YEJ7;REV__E9PJK4;REV__A6NI28	REV__H0YEJ7;REV__E9PJK4;REV__A6NI28	1;1;1	1;1;1	1;1;1	tr|H0YEJ7|H0YEJ7_HUMAN Isoform of A6NI28, Rho GTPase-activating protein 42 (Fragment) OS=Homo sapiens OX=9606 GN=ARHGAP42 PE=1 SV=1;tr|E9PJK4|E9PJK4_HUMAN Isoform of A6NI28, Rho GTPase-activating protein 42 OS=Homo sapiens OX=9606 GN=ARHGAP42 PE=1 SV=1;sp|	3	1	1	1	1	0	0	0	1	0	0	0	1	0	0	0	0	0	0	48.01	443	443;840;874	1	-2	1.6578	1.614	31.209	2	0	Median	1.6578	NaN	NaN	NaN	1.614	NaN	NaN	NaN
UFD1L	Ubiquitin fusion degradation protein 1 homolog	1.6381	NaN	NaN	NaN	C9J6N9;C9IZG3;Q92890-3;Q92890;Q92890-1;C9JNP9	C9J6N9;C9IZG3;Q92890-3;Q92890;Q92890-1;C9JNP9	2;2;2;2;2;1	2;2;2;2;2;1	2;2;2;2;2;1	tr|C9J6N9|C9J6N9_HUMAN Isoform of Q92890, Ubiquitin recognition factor in ER-associated degradation protein 1 (Fragment) OS=Homo sapiens OX=9606 GN=UFD1 PE=1 SV=8;tr|C9IZG3|C9IZG3_HUMAN Isoform of Q92890, Ubiquitin recognition factor in ER-associated degra	6	2	2	2	1	1	0	0	1	1	0	0	1	1	0	0	18.5	18.5	18.5	15.372	135	135;190;266;307;343;159	0	3.5906	1.759	1.6381	NaN	1	0	Median	1.759	NaN	NaN	NaN	1.6381	NaN	NaN	NaN
NDUFAB1	Acyl carrier protein;Acyl carrier protein, mitochondrial	1.6481	NaN	NaN	NaN	H3BNK3;O14561	H3BNK3;O14561	1;1	1;1	1;1	tr|H3BNK3|H3BNK3_HUMAN Isoform of O14561, Acyl carrier protein (Fragment) OS=Homo sapiens OX=9606 GN=NDUFAB1 PE=1 SV=1;sp|O14561|ACPM_HUMAN Acyl carrier protein, mitochondrial OS=Homo sapiens OX=9606 GN=NDUFAB1 PE=1 SV=3	2	1	1	1	1	0	0	0	1	0	0	0	1	0	0	0	13.5	13.5	13.5	12.099	111	111;156	1	-2	1.6461	1.6481	NaN	1	0	Median	1.6461	NaN	NaN	NaN	1.6481	NaN	NaN	NaN
TECR	Very-long-chain enoyl-CoA reductase	1.6579	NaN	NaN	NaN	M0R2N5;Q9NZ01	M0R2N5;Q9NZ01	2;2	2;2	2;2	tr|M0R2N5|M0R2N5_HUMAN Isoform of Q9NZ01, Very-long-chain enoyl-CoA reductase OS=Homo sapiens OX=9606 GN=TECR PE=1 SV=1;sp|Q9NZ01|TECR_HUMAN Very-long-chain enoyl-CoA reductase OS=Homo sapiens OX=9606 GN=TECR PE=1 SV=1	2	2	2	2	2	0	0	0	2	0	0	0	2	0	0	0	5.5	5.5	5.5	39.967	346	346;308	0.0072966	1.6076	1.6748	1.6579	5.9003	2	2	Median	1.6748	NaN	NaN	NaN	1.6579	NaN	NaN	NaN
UQCRC1	Cytochrome b-c1 complex subunit 1, mitochondrial	1.6926	NaN	1.3918	NaN	P31930	P31930	2	2	2	sp|P31930|QCR1_HUMAN Cytochrome b-c1 complex subunit 1, mitochondrial OS=Homo sapiens OX=9606 GN=UQCRC1 PE=1 SV=3	1	2	2	2	2	0	1	0	2	0	1	0	2	0	1	0	6	6	6	52.645	480	480	0.00043384	3.0817	1.7656	1.6622	11.442	3	1	Median	1.7976	NaN	0.97264	NaN	1.6926	NaN	1.3918	NaN
SMG1	Serine/threonine-protein kinase SMG1	1.6971	NaN	0.8319	NaN	J3KRA9;Q96Q15-4;Q96Q15-3;Q96Q15-2;Q96Q15	J3KRA9;Q96Q15-4;Q96Q15-3;Q96Q15-2;Q96Q15	3;3;3;3;3	3;3;3;3;3	3;3;3;3;3	tr|J3KRA9|J3KRA9_HUMAN Isoform of Q96Q15, Serine/threonine-protein kinase SMG1 (Fragment) OS=Homo sapiens OX=9606 GN=SMG1 PE=1 SV=1;sp|Q96Q15-4|SMG1-4_HUMAN Isoform of Q96Q15, Isoform 4 of Serine/threonine-protein kinase SMG1 OS=Homo sapiens OX=9606 GN=SMG	5	3	3	3	2	0	1	0	2	0	1	0	2	0	1	0	1.4	1.4	1.4	398.84	3551	3551;2392;3031;3521;3661	0	9.5373	1.0174	1.1882	50.412	2	2	Median	1.7931	NaN	0.57728	NaN	1.6971	NaN	0.8319	NaN
CPD	Carboxypeptidase D	1.7307	NaN	NaN	NaN	O75976;O75976-2;J3QQJ4	O75976;O75976-2	3;3;1	3;3;1	3;3;1	sp|O75976|CBPD_HUMAN Carboxypeptidase D OS=Homo sapiens OX=9606 GN=CPD PE=1 SV=2;sp|O75976-2|CBPD-2_HUMAN Isoform of O75976, Isoform 2 of Carboxypeptidase D OS=Homo sapiens OX=9606 GN=CPD PE=1 SV=2	3	3	3	3	3	0	0	0	3	0	0	0	3	0	0	0	2.5	2.5	2.5	152.93	1380	1380;1133;184	0.00042662	2.8899	1.7994	1.7307	0.60126	2	0	Median	1.7994	NaN	NaN	NaN	1.7307	NaN	NaN	NaN
PTPRD	Protein-tyrosine-phosphatase;Receptor-type tyrosine-protein phosphatase delta	1.7617	NaN	NaN	NaN	Q3KPI9;F5GWR7;P23468-3;P23468-7;P23468-5;P23468-4;P23468-6;P23468-2;P23468	Q3KPI9;F5GWR7;P23468-3;P23468-7;P23468-5;P23468-4;P23468-6;P23468-2;P23468	1;1;1;1;1;1;1;1;1	1;1;1;1;1;1;1;1;1	1;1;1;1;1;1;1;1;1	tr|Q3KPI9|Q3KPI9_HUMAN Isoform of P23468, PTPRD protein OS=Homo sapiens OX=9606 GN=PTPRD PE=1 SV=1;tr|F5GWR7|F5GWR7_HUMAN Isoform of P23468, Receptor-type tyrosine-protein phosphatase delta OS=Homo sapiens OX=9606 GN=PTPRD PE=1 SV=1;sp|P23468-3|PTPRD-3_HUM	9	1	1	1	1	0	0	0	1	0	0	0	1	0	0	0	1	1	1	168.66	1496	1496;1505;1383;1502;1505;1505;1506;1890;1912	1	-2	1.8135	1.7617	NaN	1	0	Median	1.8135	NaN	NaN	NaN	1.7617	NaN	NaN	NaN
PSMG3	Proteasome assembly chaperone 3	1.8204	NaN	1.6675	NaN	Q9BT73	Q9BT73	2	2	2	sp|Q9BT73|PSMG3_HUMAN Proteasome assembly chaperone 3 OS=Homo sapiens OX=9606 GN=PSMG3 PE=1 SV=1	1	2	2	2	1	0	2	0	1	0	2	0	1	0	2	0	23	23	23	13.104	122	122	0.00082988	2.5636	1.4026	1.7423	6.2032	2	0	Median	1.832	NaN	1.0739	NaN	1.8204	NaN	1.6675	NaN
TPD52L2	Tumor protein D54	1.8216	NaN	1.3421	NaN	A0A087WZ51;A0A087WYR3;O43399-2;O43399-4;O43399;O43399-3;O43399-5;O43399-7;O43399-6	A0A087WZ51;A0A087WYR3;O43399-2;O43399-4;O43399;O43399-3;O43399-5;O43399-7;O43399-6	2;2;2;2;2;2;2;2;1	2;2;2;2;2;2;2;2;1	2;2;2;2;2;2;2;2;1	tr|A0A087WZ51|A0A087WZ51_HUMAN Isoform of O43399, Tumor protein D54 OS=Homo sapiens OX=9606 GN=TPD52L2 PE=1 SV=1;tr|A0A087WYR3|A0A087WYR3_HUMAN Isoform of O43399, Tumor protein D54 OS=Homo sapiens OX=9606 GN=TPD52L2 PE=1 SV=1;sp|O43399-2|TPD54-2_HUMAN Isof	9	2	2	2	1	0	2	0	1	0	2	0	1	0	2	0	19.1	19.1	19.1	16.306	152	152;222;186;200;206;209;220;229;163	0	14.726	1.6635	1.8216	68.831	3	2	Median	1.8441	NaN	0.78895	NaN	1.8216	NaN	1.3421	NaN
ARFIP1	Arfaptin-1	1.8315	NaN	1.335	NaN	P53367-2;P53367-3;P53367	P53367-2;P53367-3;P53367	3;2;2	3;2;2	3;2;2	sp|P53367-2|ARFP1-2_HUMAN Isoform of P53367, Isoform A of Arfaptin-1 OS=Homo sapiens OX=9606 GN=ARFIP1 PE=1 SV=2;sp|P53367-3|ARFP1-3_HUMAN Isoform of P53367, Isoform 3 of Arfaptin-1 OS=Homo sapiens OX=9606 GN=ARFIP1 PE=1 SV=2;sp|P53367|ARFP1_HUMAN Arfaptin	3	3	3	3	3	0	1	0	3	0	1	0	3	0	1	0	12.6	12.6	12.6	38.598	341	341;193;373	0	4.9932	1.5932	1.5006	27.022	3	1	Median	1.9459	NaN	0.948	NaN	1.8315	NaN	1.335	NaN
MRPL32	39S ribosomal protein L32, mitochondrial	1.8656	NaN	NaN	NaN	Q9BYC8	Q9BYC8	1	1	1	sp|Q9BYC8|RM32_HUMAN 39S ribosomal protein L32, mitochondrial OS=Homo sapiens OX=9606 GN=MRPL32 PE=1 SV=1	1	1	1	1	1	0	0	0	1	0	0	0	1	0	0	0	11.7	11.7	11.7	21.405	188	188	0	4.2071	1.8735	1.8656	NaN	1	1	Median	1.8735	NaN	NaN	NaN	1.8656	NaN	NaN	NaN
BRI3BP	BRI3-binding protein	1.9262	NaN	NaN	NaN	Q8WY22	Q8WY22	2	2	2	sp|Q8WY22|BRI3B_HUMAN BRI3-binding protein OS=Homo sapiens OX=9606 GN=BRI3BP PE=1 SV=1	1	2	2	2	1	1	0	1	1	1	0	1	1	1	0	1	14.3	14.3	14.3	27.835	251	251	0.0004417	3.3241	1.9425	1.9262	NaN	1	0	Median	1.9425	NaN	NaN	NaN	1.9262	NaN	NaN	NaN
		1.9456	NaN	NaN	NaN	REV__Q9BZF3-6;REV__Q9BZF3-2;REV__Q9BZF3-4;REV__Q9BZF3;REV__Q9BZF3-3;REV__Q9BZF3-5	REV__Q9BZF3-6;REV__Q9BZF3-2;REV__Q9BZF3-4;REV__Q9BZF3;REV__Q9BZF3-3;REV__Q9BZF3-5	1;1;1;1;1;1	1;1;1;1;1;1	1;1;1;1;1;1	sp|Q9BZF3-6|OSBL6-6_HUMAN Isoform of Q9BZF3, Isoform 6 of Oxysterol-binding protein-related protein 6 OS=Homo sapiens OX=9606 GN=OSBPL6 PE=1 SV=1;sp|Q9BZF3-2|OSBL6-2_HUMAN Isoform of Q9BZF3, Isoform 2 of Oxysterol-binding protein-related protein 6 OS=Homo	6	1	1	1	1	0	0	0	1	0	0	0	1	0	0	0	0	0	0	56.95	508	508;898;903;934;938;959	0.007617	1.5794	2.0118	1.9456	NaN	1	0	Median	2.0118	NaN	NaN	NaN	1.9456	NaN	NaN	NaN
SLC13A1		1.9615	NaN	NaN	NaN	F5GYP1	F5GYP1	1	1	1	tr|F5GYP1|F5GYP1_HUMAN Isoform of Q9BZW2, Solute carrier family 13 member 1 OS=Homo sapiens OX=9606 GN=SLC13A1 PE=4 SV=1	1	1	1	1	1	0	0	0	1	0	0	0	1	0	0	0	6.8	6.8	6.8	17.956	161	161	1	-2	2.1297	1.9615	NaN	1	1	Median	2.1297	NaN	NaN	NaN	1.9615	NaN	NaN	NaN
ATP6V1G2-DDX39B;ATP6V1G2;ATP6V1G1	V-type proton ATPase subunit G 2;V-type proton ATPase subunit G 1	1.9624	NaN	NaN	NaN	F2Z307;O95670-2;O95670;O75348	F2Z307;O95670-2;O95670;O75348	1;1;1;1	1;1;1;1	1;1;1;1	tr|F2Z307|F2Z307_HUMAN V-type proton ATPase subunit G OS=Homo sapiens OX=9606 GN=ATP6V1G2-DDX39B PE=3 SV=1;sp|O95670-2|VATG2-2_HUMAN Isoform of O95670, Isoform 2 of V-type proton ATPase subunit G 2 OS=Homo sapiens OX=9606 GN=ATP6V1G2 PE=2 SV=1;sp|O95670|VA	4	1	1	1	1	0	1	0	1	0	1	0	1	0	1	0	16.2	16.2	16.2	11.355	99	99;78;118;118	0	15.804	1.9109	1.9624	NaN	1	0	Median	1.9109	NaN	NaN	NaN	1.9624	NaN	NaN	NaN
DHCR7	7-dehydrocholesterol reductase	1.9875	NaN	NaN	NaN	H0YE57;Q9UBM7	H0YE57;Q9UBM7	1;1	1;1	1;1	tr|H0YE57|H0YE57_HUMAN Isoform of Q9UBM7, 7-dehydrocholesterol reductase (Fragment) OS=Homo sapiens OX=9606 GN=DHCR7 PE=1 SV=1;sp|Q9UBM7|DHCR7_HUMAN 7-dehydrocholesterol reductase OS=Homo sapiens OX=9606 GN=DHCR7 PE=1 SV=1	2	1	1	1	1	0	0	0	1	0	0	0	1	0	0	0	5	5	5	25.479	221	221;475	0.0096257	1.4806	2.0544	1.9875	NaN	1	0	Median	2.0544	NaN	NaN	NaN	1.9875	NaN	NaN	NaN
ITGA6	Integrin alpha-6;Integrin alpha-6 heavy chain;Integrin alpha-6 light chain;Processed integrin alpha-6	1.998	NaN	0.78709	NaN	P23229-7;P23229-4;P23229-2;P23229-5;P23229-3;P23229-9;P23229-6;P23229	P23229-7;P23229-4;P23229-2;P23229-5;P23229-3;P23229-9;P23229-6;P23229	3;3;3;3;3;3;3;3	3;3;3;3;3;3;3;3	3;3;3;3;3;3;3;3	sp|P23229-7|ITA6-7_HUMAN Isoform of P23229, Isoform 7 of Integrin alpha-6 OS=Homo sapiens OX=9606 GN=ITGA6 PE=1 SV=5;sp|P23229-4|ITA6-4_HUMAN Isoform of P23229, Isoform Alpha-6X2A of Integrin alpha-6 OS=Homo sapiens OX=9606 GN=ITGA6 PE=1 SV=5;sp|P23229-2|I	8	3	3	3	1	0	2	0	1	0	2	0	1	0	2	0	5.9	5.9	5.9	106.58	954	954;1068;1073;1086;1091;1097;1112;1130	0	4.8345	1.1895	1.254	65.873	2	0	Median	2.0783	NaN	0.68081	NaN	1.998	NaN	0.78709	NaN
ADH5	Alcohol dehydrogenase class-3	2.0042	NaN	1.5683	NaN	D6RFE4;P11766	D6RFE4;P11766	1;1	1;1	1;1	tr|D6RFE4|D6RFE4_HUMAN Isoform of P11766, Alcohol dehydrogenase class-3 OS=Homo sapiens OX=9606 GN=ADH5 PE=1 SV=1;sp|P11766|ADHX_HUMAN Alcohol dehydrogenase class-3 OS=Homo sapiens OX=9606 GN=ADH5 PE=1 SV=4	2	1	1	1	1	0	1	0	1	0	1	0	1	0	1	0	14.8	14.8	14.8	12.215	115	115;374	0	5.0453	1.596	1.7729	17.341	2	1	Median	2.1632	NaN	1.1776	NaN	2.0042	NaN	1.5683	NaN
SPAG9	C-Jun-amino-terminal kinase-interacting protein 4	2.0141	NaN	1.1651	NaN	O60271-9;O60271-4;O60271;A0A087X2D8;O60271-5;O60271-3;O60271-2	O60271-9;O60271-4;O60271;A0A087X2D8;O60271-5;O60271-3;O60271-2	3;3;3;2;2;2;2	3;3;3;2;2;2;2	3;3;3;2;2;2;2	sp|O60271-9|JIP4-9_HUMAN Isoform of O60271, Isoform 6 of C-Jun-amino-terminal kinase-interacting protein 4 OS=Homo sapiens OX=9606 GN=SPAG9 PE=1 SV=4;sp|O60271-4|JIP4-4_HUMAN Isoform of O60271, Isoform 4 of C-Jun-amino-terminal kinase-interacting protein 4	7	3	3	3	3	0	3	0	3	0	3	0	3	0	3	0	4.6	4.6	4.6	128.61	1177	1177;1307;1321;1312;931;945;1311	0	25.553	1.391	1.5516	33.79	4	1	Median	2.0853	NaN	0.8545	NaN	2.0141	NaN	1.1651	NaN
MOCS2	Molybdopterin synthase catalytic subunit	2.0352	NaN	1.8883	NaN	O96007	O96007	1	1	1	sp|O96007|MOC2B_HUMAN Molybdopterin synthase catalytic subunit OS=Homo sapiens OX=9606 GN=MOCS2 PE=1 SV=1	1	1	1	1	1	0	1	0	1	0	1	0	1	0	1	0	8	8	8	20.944	188	188	0.0023193	2.0381	1.6523	1.9604	5.2959	2	1	Median	2.0732	NaN	1.3169	NaN	2.0352	NaN	1.8883	NaN
ATP5L	ATP synthase subunit g, mitochondrial	2.08	NaN	NaN	NaN	A0A3B3IRW3;E9PN17;A0A3B3ITX4;O75964	A0A3B3IRW3;E9PN17;A0A3B3ITX4;O75964	1;1;1;1	1;1;1;1	1;1;1;1	tr|A0A3B3IRW3|A0A3B3IRW3_HUMAN Isoform of O75964, ATP synthase subunit g, mitochondrial OS=Homo sapiens OX=9606 GN=ATP5MG PE=4 SV=1;tr|E9PN17|E9PN17_HUMAN Isoform of O75964, ATP synthase subunit g, mitochondrial OS=Homo sapiens OX=9606 GN=ATP5MG PE=1 SV=1;	4	1	1	1	1	0	0	0	1	0	0	0	1	0	0	0	44.1	44.1	44.1	3.8676	34	34;76;91;103	0.0086083	1.5059	2.0254	2.08	NaN	1	1	Median	2.0254	NaN	NaN	NaN	2.08	NaN	NaN	NaN
HRSP12	Ribonuclease UK114	2.2534	NaN	NaN	NaN	P52758	P52758	1	1	1	sp|P52758|RIDA_HUMAN 2-iminobutanoate/2-iminopropanoate deaminase OS=Homo sapiens OX=9606 GN=RIDA PE=1 SV=1	1	1	1	1	1	0	0	0	1	0	0	0	1	0	0	0	11.7	11.7	11.7	14.494	137	137	0.0023157	2.0281	2.295	2.2534	NaN	1	0	Median	2.295	NaN	NaN	NaN	2.2534	NaN	NaN	NaN
EML4	Echinoderm microtubule-associated protein-like 4	2.4763	NaN	1.8687	NaN	B5MBZ0;Q9HC35;Q9HC35-2	B5MBZ0;Q9HC35;Q9HC35-2	3;3;2	3;3;2	3;3;2	tr|B5MBZ0|B5MBZ0_HUMAN Isoform of Q9HC35, Echinoderm microtubule-associated protein-like 4 OS=Homo sapiens OX=9606 GN=EML4 PE=1 SV=3;sp|Q9HC35|EMAL4_HUMAN Echinoderm microtubule-associated protein-like 4 OS=Homo sapiens OX=9606 GN=EML4 PE=1 SV=3;sp|Q9HC35-	3	3	3	3	2	0	2	0	2	0	2	0	2	0	2	0	4.4	4.4	4.4	110.18	992	992;981;923	0.00084069	2.7109	1.9619	2.3147	20.673	4	2	Median	2.708	NaN	1.2162	NaN	2.4763	NaN	1.8687	NaN
DNAI2		5.6991	NaN	NaN	NaN	J3QRG2	J3QRG2	2	2	2	tr|J3QRG2|J3QRG2_HUMAN Isoform of Q9GZS0, Dynein intermediate chain 2, axonemal OS=Homo sapiens OX=9606 GN=DNAI2 PE=1 SV=1	1	2	2	2	1	0	0	1	1	0	0	1	1	0	0	1	6.6	6.6	6.6	74.847	662	662	0.0037965	1.9196	6.2133	5.6991	NaN	1	1	Median	6.2133	NaN	NaN	NaN	5.6991	NaN	NaN	NaN
MAPK7	Mitogen-activated protein kinase 7	6.5288	NaN	NaN	NaN	Q13164-4	Q13164-4	1	1	1	sp|Q13164-4|MK07-4_HUMAN Isoform of Q13164, Isoform 4 of Mitogen-activated protein kinase 7 OS=Homo sapiens OX=9606 GN=MAPK7 PE=1 SV=2	1	1	1	1	1	0	0	0	1	0	0	0	1	0	0	0	3.8	3.8	3.8	50.151	451	451	1	-2	6.915	6.5288	NaN	1	1	Median	6.915	NaN	NaN	NaN	6.5288	NaN	NaN	NaN
SMARCD1	SWI/SNF-related matrix-associated actin-dependent regulator of chromatin subfamily D member 1	9.9458	NaN	6.3527	NaN	Q96GM5-2;Q96GM5;F8VZ70;F8VUB0;F8VRQ4	Q96GM5-2;Q96GM5;F8VZ70;F8VUB0;F8VRQ4	2;2;1;1;1	2;2;1;1;1	2;2;1;1;1	sp|Q96GM5-2|SMRD1-2_HUMAN Isoform of Q96GM5, Isoform 2 of SWI/SNF-related matrix-associated actin-dependent regulator of chromatin subfamily D member 1 OS=Homo sapiens OX=9606 GN=SMARCD1 PE=1 SV=2;sp|Q96GM5|SMRD1_HUMAN SWI/SNF-related matrix-associated act	5	2	2	2	1	1	1	0	1	1	1	0	1	1	1	0	6.1	6.1	6.1	53.298	474	474;515;278;289;313	0.0083183	1.566	7.0394	7.9487	31.698	2	2	Median	10.66	NaN	4.6483	NaN	9.9458	NaN	6.3527	NaN
HDGFRP2	Hepatoma-derived growth factor-related protein 2	30.887	NaN	0.8002	NaN	Q7Z4V5-2;Q7Z4V5;Q7Z4V5-4;Q7Z4V5-3;A0A087WX58;M0R0J3;K7EPS6;A0A087WT54	Q7Z4V5-2;Q7Z4V5;Q7Z4V5-4;Q7Z4V5-3	3;3;2;2;1;1;1;1	3;3;2;2;1;1;1;1	3;3;2;2;1;1;1;1	sp|Q7Z4V5-2|HDGR2-2_HUMAN Isoform of Q7Z4V5, Isoform 2 of Hepatoma-derived growth factor-related protein 2 OS=Homo sapiens OX=9606 GN=HDGFL2 PE=1 SV=1;sp|Q7Z4V5|HDGR2_HUMAN Hepatoma-derived growth factor-related protein 2 OS=Homo sapiens OX=9606 GN=HDGFL2	8	3	3	3	1	1	3	0	1	1	3	0	1	1	3	0	7	7	7	74.229	670	670;671;675;676;68;97;153;473	0	106.3	1.3232	1.9937	175.05	6	6	Median	32.953	NaN	0.49373	NaN	30.887	NaN	0.8002	NaN
EHD1	EH domain-containing protein 1	NaN	NaN	NaN	NaN	C9JC03;A0A024R571;C9JIJ3;C9IZH1;Q9H4M9	C9JC03;A0A024R571;C9JIJ3;C9IZH1;Q9H4M9	2;2;1;1;1	2;2;1;1;1	2;2;1;1;1	tr|C9JC03|C9JC03_HUMAN Isoform of Q9H4M9, EH domain-containing protein 1 (Fragment) OS=Homo sapiens OX=9606 GN=EHD1 PE=1 SV=1;tr|A0A024R571|A0A024R571_HUMAN Isoform of Q9H4M9, EH domain-containing protein 1 OS=Homo sapiens OX=9606 GN=EHD1 PE=1 SV=1;tr|C9JI	5	2	2	2	1	0	0	1	1	0	0	1	1	0	0	1	9.1	9.1	9.1	42.737	374	374;548;145;148;534	0.009908	1.4389	NaN	NaN	NaN	0	0	Median	NaN	NaN	NaN	NaN	NaN	NaN	NaN	NaN
YTHDF3;YTHDF1	YTH domain-containing family protein 3;YTH domain-containing family protein 1	NaN	NaN	1.0096	NaN	A0A024R7W5;A0A087X0Q1;A0A087WY31;Q7Z739;Q9BYJ9	A0A024R7W5;A0A087X0Q1;A0A087WY31;Q7Z739;Q9BYJ9	3;3;3;3;2	2;2;2;2;1	2;2;2;2;1	tr|A0A024R7W5|A0A024R7W5_HUMAN Isoform of Q7Z739, YTH domain family, member 3, isoform CRA_a OS=Homo sapiens OX=9606 GN=YTHDF3 PE=1 SV=1;tr|A0A087X0Q1|A0A087X0Q1_HUMAN Isoform of Q7Z739, YTH domain-containing family protein 3 OS=Homo sapiens OX=9606 GN=YTH	5	3	2	2	0	0	3	2	0	0	2	1	0	0	2	1	7.1	5.4	5.4	58.311	534	534;583;588;585;559	0.0048634	1.8071	0.72123	1.0096	3.7188	2	1	Median	NaN	NaN	0.72123	NaN	NaN	NaN	1.0096	NaN
PSMB3		NaN	NaN	NaN	NaN	A0A087WUL2	A0A087WUL2	4	1	1	tr|A0A087WUL2|A0A087WUL2_HUMAN Isoform of P49720, Proteasome subunit beta type-3 (Fragment) OS=Homo sapiens OX=9606 GN=PSMB3 PE=1 SV=1	1	4	1	1	2	1	4	1	0	0	1	0	0	0	1	0	41.4	8.3	8.3	16.161	145	145	1	-2	NaN	NaN	NaN	0	0	Median	NaN	NaN	NaN	NaN	NaN	NaN	NaN	NaN
MASTL	Serine/threonine-protein kinase greatwall	NaN	NaN	1.1415	NaN	A0A087WUU7;Q96GX5-2;Q96GX5-3;Q96GX5	A0A087WUU7;Q96GX5-2;Q96GX5-3;Q96GX5	1;1;1;1	1;1;1;1	1;1;1;1	tr|A0A087WUU7|A0A087WUU7_HUMAN Isoform of Q96GX5, Serine/threonine-protein kinase greatwall (Fragment) OS=Homo sapiens OX=9606 GN=MASTL PE=1 SV=1;sp|Q96GX5-2|GWL-2_HUMAN Isoform of Q96GX5, Isoform 2 of Serine/threonine-protein kinase greatwall OS=Homo sapi	4	1	1	1	0	0	1	0	0	0	1	0	0	0	1	0	3.3	3.3	3.3	53.296	479	479;840;878;879	0.002322	2.0447	0.91968	1.1415	NaN	1	0	Median	NaN	NaN	0.91968	NaN	NaN	NaN	1.1415	NaN
CLTCL1		NaN	NaN	NaN	NaN	A0A087WV74;A0A087WXH4	A0A087WV74;A0A087WXH4	2;2	1;1	1;1	tr|A0A087WV74|A0A087WV74_HUMAN Isoform of P53675, Clathrin heavy chain 2 OS=Homo sapiens OX=9606 GN=CLTCL1 PE=1 SV=1;tr|A0A087WXH4|A0A087WXH4_HUMAN Isoform of P53675, Clathrin heavy chain 2 OS=Homo sapiens OX=9606 GN=CLTCL1 PE=1 SV=1	2	2	1	1	0	1	1	1	0	1	0	0	0	1	0	0	7.9	3.8	3.8	43.1	369	369;463	1	-2	NaN	NaN	NaN	0	0	Median	NaN	NaN	NaN	NaN	NaN	NaN	NaN	NaN
NAA50	N-alpha-acetyltransferase 50	NaN	NaN	0.92235	NaN	A0A087WWJ2;C9J5D1;E7EQ69;Q9GZZ1-2;Q9GZZ1;F8WCK0;C9JZU6;C9J5J3;A0A0D9SF32;B0AZT5	A0A087WWJ2;C9J5D1;E7EQ69;Q9GZZ1-2;Q9GZZ1;F8WCK0;C9JZU6;C9J5J3;A0A0D9SF32;B0AZT5	2;2;2;2;2;1;1;1;1;1	2;2;2;2;2;1;1;1;1;1	2;2;2;2;2;1;1;1;1;1	tr|A0A087WWJ2|A0A087WWJ2_HUMAN Isoform of Q9GZZ1, N-alpha-acetyltransferase 50 OS=Homo sapiens OX=9606 GN=NAA50 PE=1 SV=1;tr|C9J5D1|C9J5D1_HUMAN Isoform of Q9GZZ1, N-alpha-acetyltransferase 50 OS=Homo sapiens OX=9606 GN=NAA50 PE=1 SV=1;tr|E7EQ69|E7EQ69_HUM	10	2	2	2	0	0	2	0	0	0	2	0	0	0	2	0	29.6	29.6	29.6	9.4367	81	81;129;168;81;169;48;57;58;58;95	0	3.6808	0.54536	0.92235	21.96	2	0	Median	NaN	NaN	0.54536	NaN	NaN	NaN	0.92235	NaN
RSBN1	Round spermatid basic protein 1	NaN	NaN	NaN	NaN	A0A0C4DH79;A0A0C4DGT8;A0A087WWP8;Q5VWQ0-4;Q5VWQ0	A0A0C4DH79;A0A0C4DGT8;A0A087WWP8;Q5VWQ0-4;Q5VWQ0	1;1;1;1;1	1;1;1;1;1	1;1;1;1;1	tr|A0A0C4DH79|A0A0C4DH79_HUMAN Isoform of Q5VWQ0, Lysine-specific demethylase 9 OS=Homo sapiens OX=9606 GN=RSBN1 PE=1 SV=1;tr|A0A0C4DGT8|A0A0C4DGT8_HUMAN Isoform of Q5VWQ0, Lysine-specific demethylase 9 OS=Homo sapiens OX=9606 GN=RSBN1 PE=1 SV=1;tr|A0A087W	5	1	1	1	0	1	1	0	0	1	1	0	0	1	1	0	3.9	3.9	3.9	45.705	411	411;685;754;459;802	0	41.149	NaN	NaN	NaN	0	0	Median	NaN	NaN	NaN	NaN	NaN	NaN	NaN	NaN
AGAP1	Arf-GAP with GTPase, ANK repeat and PH domain-containing protein 1	NaN	NaN	0.31279	NaN	A0A087X044;A0A087X1U1;F5GXM9;E7EUN2;Q9UPQ3-3;Q9UPQ3-2;Q9UPQ3	A0A087X044;A0A087X1U1;F5GXM9;E7EUN2;Q9UPQ3-3;Q9UPQ3-2;Q9UPQ3	1;1;1;1;1;1;1	1;1;1;1;1;1;1	1;1;1;1;1;1;1	tr|A0A087X044|A0A087X044_HUMAN Isoform of Q9UPQ3, Arf-GAP with GTPase, ANK repeat and PH domain-containing protein 1 OS=Homo sapiens OX=9606 GN=AGAP1 PE=1 SV=1;tr|A0A087X1U1|A0A087X1U1_HUMAN Isoform of Q9UPQ3, Arf-GAP with GTPase, ANK repeat and PH domain-	7	1	1	1	0	0	1	0	0	0	1	0	0	0	1	0	6.3	6.3	6.3	38.134	351	351;750;803;1069;405;804;857	0.00043668	3.1712	0.22667	0.31279	NaN	1	1	Median	NaN	NaN	0.22667	NaN	NaN	NaN	0.31279	NaN
NEB	Nebulin	NaN	NaN	NaN	NaN	H0Y786;A0A087X1N7;P20929-4;P20929;P20929-3;P20929-2	H0Y786;A0A087X1N7;P20929-4;P20929;P20929-3;P20929-2	1;1;1;1;1;1	1;1;1;1;1;1	1;1;1;1;1;1	tr|H0Y786|H0Y786_HUMAN Isoform of P20929, Nebulin (Fragment) OS=Homo sapiens OX=9606 GN=NEB PE=1 SV=1;tr|A0A087X1N7|A0A087X1N7_HUMAN Isoform of P20929, Nebulin OS=Homo sapiens OX=9606 GN=NEB PE=1 SV=1;sp|P20929-4|NEBU-4_HUMAN Isoform of P20929, Isoform 4 o	6	1	1	1	1	1	1	1	1	1	1	1	1	1	1	1	0.5	0.5	0.5	348.95	3007	3007;8560;6669;6669;8525;8525	0.0023447	2.1142	NaN	NaN	NaN	0	0	Median	NaN	NaN	NaN	NaN	NaN	NaN	NaN	NaN
SYNE2	Nesprin-2	NaN	NaN	0.73133	NaN	G3V5X4;A0A0A0MRE3;Q8WXH0;Q8WXH0-2;A0A0C4DGK3;Q8WXH0-7	G3V5X4;A0A0A0MRE3;Q8WXH0;Q8WXH0-2;A0A0C4DGK3;Q8WXH0-7	2;2;2;2;1;1	2;2;2;2;1;1	2;2;2;2;1;1	tr|G3V5X4|G3V5X4_HUMAN Isoform of Q8WXH0, Nesprin-2 OS=Homo sapiens OX=9606 GN=SYNE2 PE=1 SV=1;tr|A0A0A0MRE3|A0A0A0MRE3_HUMAN Isoform of Q8WXH0, Nesprin-2 OS=Homo sapiens OX=9606 GN=SYNE2 PE=1 SV=1;sp|Q8WXH0|SYNE2_HUMAN Nesprin-2 OS=Homo sapiens OX=9606 GN	6	2	2	2	0	0	2	0	0	0	2	0	0	0	2	0	0.5	0.5	0.5	787.71	6818	6818;6824;6885;6907;3541;3270	0.0095745	1.4454	0.49242	0.73133	NaN	1	1	Median	NaN	NaN	0.49242	NaN	NaN	NaN	0.73133	NaN
FDXR	NADPH:adrenodoxin oxidoreductase, mitochondrial	NaN	NaN	0.59377	NaN	A0A0A0MTN9;A0A0A0MTR6;A0A0C4DFN8;A0A0C4DGN7;A0A0A0MSZ4;A0A0A0MT64;P22570-4;P22570-6;P22570-5;P22570;P22570-2;P22570-7;P22570-3	A0A0A0MTN9;A0A0A0MTR6;A0A0C4DFN8;A0A0C4DGN7;A0A0A0MSZ4;A0A0A0MT64;P22570-4;P22570-6;P22570-5;P22570;P22570-2;P22570-7;P22570-3	1;1;1;1;1;1;1;1;1;1;1;1;1	1;1;1;1;1;1;1;1;1;1;1;1;1	1;1;1;1;1;1;1;1;1;1;1;1;1	tr|A0A0A0MTN9|A0A0A0MTN9_HUMAN Isoform of P22570, NADPH:adrenodoxin oxidoreductase, mitochondrial OS=Homo sapiens OX=9606 GN=FDXR PE=1 SV=1;tr|A0A0A0MTR6|A0A0A0MTR6_HUMAN Isoform of P22570, NADPH:adrenodoxin oxidoreductase, mitochondrial OS=Homo sapiens OX	13	1	1	1	0	0	1	0	0	0	1	0	0	0	1	0	3.2	3.2	3.2	48.027	439	439;483;491;497;522;534;439;451;483;491;497;522;534	0.0066691	1.7014	0.52778	0.59377	NaN	1	0	Median	NaN	NaN	0.52778	NaN	NaN	NaN	0.59377	NaN
MLXIPL	Carbohydrate-responsive element-binding protein	NaN	NaN	0.55121	NaN	C9JDF5;A0A0C4DG26;Q9NP71-5;Q9NP71-6;Q9NP71-4;Q9NP71-2;Q9NP71-3;Q9NP71	C9JDF5;A0A0C4DG26;Q9NP71-5;Q9NP71-6;Q9NP71-4;Q9NP71-2;Q9NP71-3;Q9NP71	1;1;1;1;1;1;1;1	1;1;1;1;1;1;1;1	1;1;1;1;1;1;1;1	tr|C9JDF5|C9JDF5_HUMAN Isoform of Q9NP71, Carbohydrate-responsive element-binding protein (Fragment) OS=Homo sapiens OX=9606 GN=MLXIPL PE=1 SV=1;tr|A0A0C4DG26|A0A0C4DG26_HUMAN Isoform of Q9NP71, Carbohydrate-responsive element-binding protein OS=Homo sapie	8	1	1	1	0	0	1	0	0	0	1	0	0	0	1	0	7	7	7	23.077	213	213;721;575;722;831;833;850;852	0.0079739	1.5768	0.45296	0.55121	NaN	1	1	Median	NaN	NaN	0.45296	NaN	NaN	NaN	0.55121	NaN
ARFGAP2	ADP-ribosylation factor GTPase-activating protein 2	NaN	NaN	NaN	NaN	H0YDN9;E9PQP3;A0A0D9SF70;G5E9L0;Q8N6H7-3;Q8N6H7-2;Q8N6H7	H0YDN9;E9PQP3;A0A0D9SF70;G5E9L0;Q8N6H7-3;Q8N6H7-2;Q8N6H7	1;1;1;1;1;1;1	1;1;1;1;1;1;1	1;1;1;1;1;1;1	tr|H0YDN9|H0YDN9_HUMAN Isoform of Q8N6H7, ADP-ribosylation factor GTPase-activating protein 2 (Fragment) OS=Homo sapiens OX=9606 GN=ARFGAP2 PE=1 SV=1;tr|E9PQP3|E9PQP3_HUMAN Isoform of Q8N6H7, ADP-ribosylation factor GTPase-activating protein 2 (Fragment) O	7	1	1	1	0	0	1	0	0	0	1	0	0	0	1	0	7.6	7.6	7.6	25.691	237	237;274;385;493;252;414;521	0.0019685	2.1824	NaN	NaN	NaN	0	0	Median	NaN	NaN	NaN	NaN	NaN	NaN	NaN	NaN
TCF4		NaN	NaN	NaN	NaN	A0A0E3D6N2	A0A0E3D6N2	1	1	1	tr|A0A0E3D6N2|A0A0E3D6N2_HUMAN Isoform of P15884, Transcription factor 4 (Fragment) OS=Homo sapiens OX=9606 GN=TCF4 PE=1 SV=1	1	1	1	1	0	0	1	0	0	0	1	0	0	0	1	0	38.5	38.5	38.5	7.092	65	65	1	-2	NaN	NaN	NaN	0	0	Median	NaN	NaN	NaN	NaN	NaN	NaN	NaN	NaN
EHMT2	Histone-lysine N-methyltransferase EHMT2	NaN	NaN	NaN	NaN	H0Y4K5;A0A0G2JRR0;A0A0G2JRN8;A0A0G2JIS2;A2ABF8;A0A0G2JIR1;A2ABF9;A0A0G2JK64;Q96KQ7-2;Q96KQ7	H0Y4K5;A0A0G2JRR0;A0A0G2JRN8;A0A0G2JIS2;A2ABF8;A0A0G2JIR1;A2ABF9;A0A0G2JK64;Q96KQ7-2;Q96KQ7	1;1;1;1;1;1;1;1;1;1	1;1;1;1;1;1;1;1;1;1	1;1;1;1;1;1;1;1;1;1	tr|H0Y4K5|H0Y4K5_HUMAN Isoform of Q96KQ7, Histone-lysine N-methyltransferase EHMT2 (Fragment) OS=Homo sapiens OX=9606 GN=EHMT2 PE=1 SV=1;tr|A0A0G2JRR0|A0A0G2JRR0_HUMAN Isoform of Q96KQ7, Histone-lysine N-methyltransferase EHMT2 (Fragment) OS=Homo sapiens O	10	1	1	1	1	0	0	0	1	0	0	0	1	0	0	0	5	5	5	32.798	298	298;888;922;1176;1233;1233;1267;1267;1176;1210	0.00084602	2.7929	NaN	NaN	NaN	0	0	Median	NaN	NaN	NaN	NaN	NaN	NaN	NaN	NaN
MICU1	Calcium uptake protein 1, mitochondrial	NaN	NaN	3.9748	NaN	S4R3D7;S4R3V1;F6XEV2;A0A0U1RRK1;A0A286YF11;Q9BPX6-2;Q9BPX6;Q9BPX6-3	S4R3D7;S4R3V1;F6XEV2;A0A0U1RRK1;A0A286YF11;Q9BPX6-2;Q9BPX6;Q9BPX6-3	1;1;1;1;1;1;1;1	1;1;1;1;1;1;1;1	1;1;1;1;1;1;1;1	tr|S4R3D7|S4R3D7_HUMAN Isoform of Q9BPX6, Calcium uptake protein 1, mitochondrial (Fragment) OS=Homo sapiens OX=9606 GN=MICU1 PE=1 SV=1;tr|S4R3V1|S4R3V1_HUMAN Isoform of Q9BPX6, Calcium uptake protein 1, mitochondrial (Fragment) OS=Homo sapiens OX=9606 GN=	8	1	1	1	0	0	1	0	0	0	1	0	0	0	1	0	9	9	9	24.137	212	212;388;478;480;482;403;476;478	0	9.2763	3.2368	3.9748	NaN	1	1	Median	NaN	NaN	3.2368	NaN	NaN	NaN	3.9748	NaN
ENAH	Protein enabled homolog	NaN	NaN	NaN	NaN	A0A0U1RRM6;Q8N8S7-3;Q8N8S7-2;Q8N8S7	A0A0U1RRM6;Q8N8S7-3;Q8N8S7-2;Q8N8S7	1;1;1;1	1;1;1;1	1;1;1;1	tr|A0A0U1RRM6|A0A0U1RRM6_HUMAN Isoform of Q8N8S7, Protein enabled homolog OS=Homo sapiens OX=9606 GN=ENAH PE=1 SV=1;sp|Q8N8S7-3|ENAH-3_HUMAN Isoform of Q8N8S7, Isoform 3 of Protein enabled homolog OS=Homo sapiens OX=9606 GN=ENAH PE=1 SV=2;sp|Q8N8S7-2|ENAH-	4	1	1	1	0	0	1	0	0	0	1	0	0	0	1	0	2.6	2.6	2.6	87.399	802	802;533;570;591	0.0019865	2.248	NaN	NaN	NaN	0	0	Median	NaN	NaN	NaN	NaN	NaN	NaN	NaN	NaN
PXN	Paxillin	NaN	NaN	1.291	NaN	F5H836;F5GZ78;A0A1B0GU60;A0A1B0GTU4;P49023-2;P49023;P49023-3	F5H836;F5GZ78;A0A1B0GU60;A0A1B0GTU4;P49023-2;P49023;P49023-3	2;2;2;2;2;2;2	2;2;2;2;2;2;2	2;2;2;2;2;2;2	tr|F5H836|F5H836_HUMAN Isoform of P49023, Paxillin (Fragment) OS=Homo sapiens OX=9606 GN=PXN PE=1 SV=8;tr|F5GZ78|F5GZ78_HUMAN Isoform of P49023, Paxillin OS=Homo sapiens OX=9606 GN=PXN PE=1 SV=1;tr|A0A1B0GU60|A0A1B0GU60_HUMAN Isoform of P49023, Paxillin OS	7	2	2	2	1	0	1	0	1	0	1	0	1	0	1	0	22.7	22.7	22.7	18.776	176	176;589;706;1081;557;591;605	0.0023346	2.0797	0.85297	1.291	NaN	1	0	Median	NaN	NaN	0.85297	NaN	NaN	NaN	1.291	NaN
		NaN	NaN	NaN	NaN	A0A1B0GV03	A0A1B0GV03	1	1	1	sp|A0A1B0GV03|GG6L7_HUMAN Golgin subfamily A member 6-like protein 7 OS=Homo sapiens OX=9606 GN=GOLGA6L7 PE=3 SV=1	1	1	1	1	0	0	1	0	0	0	1	0	0	0	1	0	3.7	3.7	3.7	75.583	622	622	0.00043122	3.006	NaN	NaN	NaN	0	0	Median	NaN	NaN	NaN	NaN	NaN	NaN	NaN	NaN
DDX25;DDX19A	ATP-dependent RNA helicase DDX25;ATP-dependent RNA helicase DDX19A	NaN	NaN	1.1753	NaN	H0YD26;A0A1B0GV69;I3L352;E9PR46;I3L0H8;J3QL17;F6QDS0;Q9UHL0-2;Q9NUU7-2;Q9NUU7;Q9UHL0	H0YD26;A0A1B0GV69;I3L352;E9PR46;I3L0H8;J3QL17;F6QDS0;Q9UHL0-2;Q9NUU7-2;Q9NUU7;Q9UHL0	1;1;1;1;1;1;1;1;1;1;1	1;1;1;1;1;1;1;1;1;1;1	1;1;1;1;1;1;1;1;1;1;1	tr|H0YD26|H0YD26_HUMAN Isoform of Q9UHL0, ATP-dependent RNA helicase DDX25 (Fragment) OS=Homo sapiens OX=9606 GN=DDX25 PE=1 SV=2;tr|A0A1B0GV69|A0A1B0GV69_HUMAN Isoform of Q9UHL0, ATP-dependent RNA helicase DDX25 OS=Homo sapiens OX=9606 GN=DDX25 PE=1 SV=1;t	11	1	1	1	0	0	1	0	0	0	1	0	0	0	1	0	5.8	5.8	5.8	21.004	191	191;197;396;407;447;468;479;369;388;478;483	0.0023068	2.0111	0.92809	1.1753	NaN	1	0	Median	NaN	NaN	0.92809	NaN	NaN	NaN	1.1753	NaN
CLIC2;CLIC5;CLIC4;CLIC6	Chloride intracellular channel protein 5;Chloride intracellular channel protein 2;Chloride intracellular channel protein 4;Chloride intracellular channel protein 6	NaN	NaN	0.91828	NaN	A6PVS0;A0A2R8Y4M1;A0A2R8YGW2;A0A2R8Y615;Q9NZA1-3;O15247;Q9NZA1-2;Q9Y696;Q9NZA1;Q96NY7-2;Q96NY7	A6PVS0;A0A2R8Y4M1;A0A2R8YGW2;A0A2R8Y615;Q9NZA1-3;O15247;Q9NZA1-2;Q9Y696;Q9NZA1;Q96NY7-2;Q96NY7	1;1;1;1;1;1;1;1;1;1;1	1;1;1;1;1;1;1;1;1;1;1	1;1;1;1;1;1;1;1;1;1;1	tr|A6PVS0|A6PVS0_HUMAN Isoform of O15247, Chloride intracellular channel 2 (Fragment) OS=Homo sapiens OX=9606 GN=CLIC2 PE=1 SV=1;tr|A0A2R8Y4M1|A0A2R8Y4M1_HUMAN Isoform of Q9NZA1, Chloride intracellular channel protein 5 OS=Homo sapiens OX=9606 GN=CLIC5 PE=	11	1	1	1	0	0	1	0	0	0	1	0	0	0	1	0	6	6	6	15.245	133	133;200;222;242;205;247;251;253;410;686;704	1	-2	0.74911	0.91828	NaN	1	0	Median	NaN	NaN	0.74911	NaN	NaN	NaN	0.91828	NaN
SLC25A38	Solute carrier family 25 member 38	NaN	NaN	NaN	NaN	A0A2R8Y823;A0A2R8Y553;Q96DW6	A0A2R8Y823;A0A2R8Y553;Q96DW6	1;1;1	1;1;1	1;1;1	tr|A0A2R8Y823|A0A2R8Y823_HUMAN Isoform of Q96DW6, Mitochondrial glycine transporter OS=Homo sapiens OX=9606 GN=SLC25A38 PE=1 SV=1;tr|A0A2R8Y553|A0A2R8Y553_HUMAN Isoform of Q96DW6, Mitochondrial glycine transporter OS=Homo sapiens OX=9606 GN=SLC25A38 PE=1 S	3	1	1	1	0	0	0	1	0	0	0	1	0	0	0	1	7.7	7.7	7.7	31.7	286	286;287;304	1	-2	NaN	NaN	NaN	0	0	Median	NaN	NaN	NaN	NaN	NaN	NaN	NaN	NaN
SAMHD1	Deoxynucleoside triphosphate triphosphohydrolase SAMHD1	NaN	NaN	1.682	NaN	A0A2R8YG48;A0A2R8Y7R5;A0A2R8Y755;A0A2R8Y586;A0A2R8YF51;A0A2R8Y5D2;A0A2R8YD90;A0A2R8YCS7;Q9Y3Z3-3;Q9Y3Z3-4;Q9Y3Z3	A0A2R8YG48;A0A2R8Y7R5;A0A2R8Y755;A0A2R8Y586;A0A2R8YF51;A0A2R8Y5D2;A0A2R8YD90;A0A2R8YCS7;Q9Y3Z3-3;Q9Y3Z3-4;Q9Y3Z3	1;1;1;1;1;1;1;1;1;1;1	1;1;1;1;1;1;1;1;1;1;1	1;1;1;1;1;1;1;1;1;1;1	tr|A0A2R8YG48|A0A2R8YG48_HUMAN Isoform of Q9Y3Z3, Deoxynucleoside triphosphate triphosphohydrolase SAMHD1 (Fragment) OS=Homo sapiens OX=9606 GN=SAMHD1 PE=1 SV=1;tr|A0A2R8Y7R5|A0A2R8Y7R5_HUMAN Isoform of Q9Y3Z3, Deoxynucleoside triphosphate triphosphohydrol	11	1	1	1	0	0	1	0	0	0	1	0	0	0	1	0	18	18	18	9.9013	89	89;127;129;156;285;289;413;589;556;591;626	0.0023256	2.0497	1.2489	1.682	NaN	1	0	Median	NaN	NaN	1.2489	NaN	NaN	NaN	1.682	NaN
ASXH1;ASXL1	Putative Polycomb group protein ASXL1	NaN	NaN	NaN	NaN	A0A494C1R1;A0A2R8Y5U1;Q76L82;Q8IXJ9	A0A494C1R1;A0A2R8Y5U1;Q76L82;Q8IXJ9	1;1;1;1	1;1;1;1	1;1;1;1	tr|A0A494C1R1|A0A494C1R1_HUMAN Isoform of Q8IXJ9, Putative Polycomb group protein ASXL1 OS=Homo sapiens OX=9606 GN=ASXL1 PE=4 SV=1;tr|A0A2R8Y5U1|A0A2R8Y5U1_HUMAN Isoform of Q8IXJ9, Putative Polycomb group protein ASXL1 OS=Homo sapiens OX=9606 GN=ASXL1 PE=1	4	1	1	1	0	0	0	1	0	0	0	1	0	0	0	1	5.4	5.4	5.4	69.051	625	625;1480;1536;1541	0	28.051	NaN	NaN	NaN	0	0	Median	NaN	NaN	NaN	NaN	NaN	NaN	NaN	NaN
BLVRB	Flavin reductase (NADPH)	NaN	NaN	2.1446	NaN	A0A2R8Y7Y9;M0QZL1;M0R192;A0A2R8YEP4;P30043	A0A2R8Y7Y9;M0QZL1;M0R192;A0A2R8YEP4;P30043	1;1;1;1;1	1;1;1;1;1	1;1;1;1;1	tr|A0A2R8Y7Y9|A0A2R8Y7Y9_HUMAN Isoform of P30043, Flavin reductase (NADPH) OS=Homo sapiens OX=9606 GN=BLVRB PE=1 SV=1;tr|M0QZL1|M0QZL1_HUMAN Isoform of P30043, Flavin reductase (NADPH) OS=Homo sapiens OX=9606 GN=BLVRB PE=1 SV=1;tr|M0R192|M0R192_HUMAN Isofo	5	1	1	1	0	0	1	0	0	0	1	0	0	0	1	0	12.4	12.4	12.4	12.534	121	121;154;163;245;206	0.001967	2.1733	1.5157	2.1446	NaN	1	0	Median	NaN	NaN	1.5157	NaN	NaN	NaN	2.1446	NaN
KIFC2	Kinesin-like protein KIFC2	NaN	NaN	NaN	NaN	A0A2R8Y870;A0A2R8YEU8;Q96AC6	A0A2R8Y870;A0A2R8YEU8;Q96AC6	1;1;1	1;1;1	1;1;1	tr|A0A2R8Y870|A0A2R8Y870_HUMAN Isoform of Q96AC6, Kinesin-like protein (Fragment) OS=Homo sapiens OX=9606 GN=KIFC2 PE=1 SV=1;tr|A0A2R8YEU8|A0A2R8YEU8_HUMAN Isoform of Q96AC6, Kinesin-like protein OS=Homo sapiens OX=9606 GN=KIFC2 PE=1 SV=1;sp|Q96AC6|KIFC2_H	3	1	1	1	1	0	0	0	1	0	0	0	1	0	0	0	1.9	1.9	1.9	80.249	744	744;791;838	1	-2	NaN	NaN	NaN	0	0	Median	NaN	NaN	NaN	NaN	NaN	NaN	NaN	NaN
		NaN	NaN	NaN	NaN	A0A3B3IRN5	A0A3B3IRN5	1	1	1	tr|A0A3B3IRN5|A0A3B3IRN5_HUMAN Isoform of Q06828, Fibromodulin OS=Homo sapiens OX=9606 GN=FMOD PE=1 SV=1	1	1	1	1	1	0	1	0	1	0	1	0	1	0	1	0	6.3	6.3	6.3	32.768	287	287	1	-2	NaN	NaN	NaN	0	0	Median	NaN	NaN	NaN	NaN	NaN	NaN	NaN	NaN
MED13L	Mediator of RNA polymerase II transcription subunit 13-like	NaN	NaN	0.67826	NaN	F8VRB8;H0YHC1;A0A3B3IS46;A0A3B3IRX3;Q71F56	F8VRB8;H0YHC1;A0A3B3IS46;A0A3B3IRX3;Q71F56	1;1;1;1;1	1;1;1;1;1	1;1;1;1;1	tr|F8VRB8|F8VRB8_HUMAN Isoform of Q71F56, Mediator of RNA polymerase II transcription subunit 13-like (Fragment) OS=Homo sapiens OX=9606 GN=MED13L PE=1 SV=2;tr|H0YHC1|H0YHC1_HUMAN Isoform of Q71F56, Mediator of RNA polymerase II transcription subunit 13-li	5	1	1	1	0	0	1	0	0	0	1	0	0	0	1	0	1.6	1.6	1.6	118.65	1081	1081;1545;1605;2222;2210	0	6.4593	0.5273	0.67826	NaN	1	0	Median	NaN	NaN	0.5273	NaN	NaN	NaN	0.67826	NaN
TTC21B	Tetratricopeptide repeat protein 21B	NaN	NaN	0.80886	NaN	H9KV93;A0A494C0N4;Q7Z4L5	H9KV93;A0A494C0N4;Q7Z4L5	1;1;1	1;1;1	1;1;1	tr|H9KV93|H9KV93_HUMAN Isoform of Q7Z4L5, Tetratricopeptide repeat protein 21B (Fragment) OS=Homo sapiens OX=9606 GN=TTC21B PE=1 SV=1;tr|A0A494C0N4|A0A494C0N4_HUMAN Isoform of Q7Z4L5, Tetratricopeptide repeat protein 21B OS=Homo sapiens OX=9606 GN=TTC21B P	3	1	1	1	0	0	1	0	0	0	1	0	0	0	1	0	6.4	6.4	6.4	32.587	283	283;1274;1316	0	3.607	0.68593	0.80886	NaN	1	1	Median	NaN	NaN	0.68593	NaN	NaN	NaN	0.80886	NaN
		NaN	NaN	0.23841	NaN	A0A494C0V6	A0A494C0V6	1	1	1	tr|A0A494C0V6|A0A494C0V6_HUMAN Isoform of P26885, Peptidyl-prolyl cis-trans isomerase FKBP2 OS=Homo sapiens OX=9606 GN=FKBP2 PE=4 SV=1	1	1	1	1	0	0	1	0	0	0	1	0	0	0	1	0	5.6	5.6	5.6	25.619	250	250	1	-2	0.21548	0.23841	NaN	1	0	Median	NaN	NaN	0.21548	NaN	NaN	NaN	0.23841	NaN
SH3PXD2B	SH3 and PX domain-containing protein 2B	NaN	NaN	NaN	NaN	A1X283	A1X283	1	1	1	sp|A1X283|SPD2B_HUMAN SH3 and PX domain-containing protein 2B OS=Homo sapiens OX=9606 GN=SH3PXD2B PE=1 SV=3	1	1	1	1	1	0	0	0	1	0	0	0	1	0	0	0	2.2	2.2	2.2	101.58	911	911	0.0045079	1.8446	NaN	NaN	NaN	0	0	Median	NaN	NaN	NaN	NaN	NaN	NaN	NaN	NaN
MPG	DNA-3-methyladenine glycosylase	NaN	NaN	1.3066	NaN	A2IDA3;P29372-5;P29372-4;P29372-2;P29372	A2IDA3;P29372-5;P29372-4;P29372-2;P29372	1;1;1;1;1	1;1;1;1;1	1;1;1;1;1	tr|A2IDA3|A2IDA3_HUMAN Isoform of P29372, DNA-3-methyladenine glycosylase (Fragment) OS=Homo sapiens OX=9606 GN=MPG PE=1 SV=1;sp|P29372-5|3MG-5_HUMAN Isoform of P29372, Isoform 4 of DNA-3-methyladenine glycosylase OS=Homo sapiens OX=9606 GN=MPG PE=1 SV=3;s	5	1	1	1	0	0	1	0	0	0	1	0	0	0	1	0	6	6	6	27.295	251	251;281;293;293;298	0.0095813	1.4458	1.0903	1.3066	NaN	1	0	Median	NaN	NaN	1.0903	NaN	NaN	NaN	1.3066	NaN
ZNF804B	Zinc finger protein 804B	NaN	NaN	NaN	NaN	A4D1E1	A4D1E1	2	2	2	sp|A4D1E1|Z804B_HUMAN Zinc finger protein 804B OS=Homo sapiens OX=9606 GN=ZNF804B PE=2 SV=2	1	2	2	2	2	0	0	0	2	0	0	0	2	0	0	0	3	3	3	152.57	1349	1349	0.000819	2.4671	NaN	NaN	NaN	0	0	Median	NaN	NaN	NaN	NaN	NaN	NaN	NaN	NaN
DDT;DDTL	D-dopachrome decarboxylase;D-dopachrome decarboxylase-like protein	NaN	NaN	2.053	NaN	B5MC82;P30046-2;P30046;A6NHG4;J3KQ18	B5MC82;P30046-2;P30046;A6NHG4;J3KQ18	2;2;2;2;1	2;2;2;2;1	2;2;2;2;1	tr|B5MC82|B5MC82_HUMAN Isoform of P30046, D-dopachrome decarboxylase OS=Homo sapiens OX=9606 GN=DDT PE=4 SV=2;sp|P30046-2|DOPD-2_HUMAN Isoform of P30046, Isoform 2 of D-dopachrome decarboxylase OS=Homo sapiens OX=9606 GN=DDT PE=1 SV=3;sp|P30046|DOPD_HUMAN	5	2	2	2	0	0	2	0	0	0	2	0	0	0	2	0	15.1	15.1	15.1	17.718	166	166;107;118;134;132	0	4.2177	1.1407	2.053	3.4308	2	0	Median	NaN	NaN	1.1407	NaN	NaN	NaN	2.053	NaN
	Putative UPF0607 protein ENSP00000382826	NaN	NaN	1.569	NaN	A8MV72	A8MV72	1	1	1	sp|A8MV72|YH009_HUMAN Putative UPF0607 protein ENSP00000382826 OS=Homo sapiens OX=9606 PE=5 SV=2	1	1	1	1	0	0	1	0	0	0	1	0	0	0	1	0	5.1	5.1	5.1	34.164	311	311	1	-2	1.2311	1.569	NaN	1	1	Median	NaN	NaN	1.2311	NaN	NaN	NaN	1.569	NaN
PSMD10	26S proteasome non-ATPase regulatory subunit 10	NaN	NaN	NaN	NaN	B1AJY5;B1AJY7;O75832;B1AJY6;O75832-2	B1AJY5;B1AJY7;O75832;B1AJY6;O75832-2	2;2;2;1;1	2;2;2;1;1	2;2;2;1;1	tr|B1AJY5|B1AJY5_HUMAN Isoform of O75832, 26S proteasome non-ATPase regulatory subunit 10 OS=Homo sapiens OX=9606 GN=PSMD10 PE=1 SV=1;tr|B1AJY7|B1AJY7_HUMAN Isoform of O75832, 26S proteasome non-ATPase regulatory subunit 10 OS=Homo sapiens OX=9606 GN=PSMD1	5	2	2	2	1	1	0	0	1	1	0	0	1	1	0	0	20	20	20	20.217	185	185;193;226;110;151	0	8.1448	NaN	NaN	NaN	0	0	Median	NaN	NaN	NaN	NaN	NaN	NaN	NaN	NaN
STK25;STK24	Serine/threonine-protein kinase 25;Serine/threonine-protein kinase 24;Serine/threonine-protein kinase 24 36 kDa subunit;Serine/threonine-protein kinase 24 12 kDa subunit	NaN	NaN	0.58334	NaN	C9JDH9;C9J6L2;C9JCC0;C9J232;H7C279;H0Y630;B4DR80;O00506-3;O00506-2;O00506;Q9Y6E0-2;Q9Y6E0	C9JDH9;C9J6L2;C9JCC0;C9J232;H7C279;H0Y630;B4DR80;O00506-3;O00506-2;O00506;Q9Y6E0-2;Q9Y6E0	1;1;1;1;1;1;1;1;1;1;1;1	1;1;1;1;1;1;1;1;1;1;1;1	1;1;1;1;1;1;1;1;1;1;1;1	tr|C9JDH9|C9JDH9_HUMAN Isoform of O00506, Serine/threonine-protein kinase 25 (Fragment) OS=Homo sapiens OX=9606 GN=STK25 PE=1 SV=1;tr|C9J6L2|C9J6L2_HUMAN Isoform of O00506, Serine/threonine-protein kinase 25 (Fragment) OS=Homo sapiens OX=9606 GN=STK25 PE=1	12	1	1	1	0	0	1	0	0	0	1	0	0	0	1	0	10.8	10.8	10.8	16.366	148	148;161;163;177;247;369;412;332;349;426;431;443	0.00988	1.4328	0.51098	0.58334	NaN	1	0	Median	NaN	NaN	0.51098	NaN	NaN	NaN	0.58334	NaN
PTPN1	Tyrosine-protein phosphatase non-receptor type;Tyrosine-protein phosphatase non-receptor type 1	NaN	NaN	1.273	NaN	B4DSN5;P18031	B4DSN5;P18031	1;1	1;1	1;1	tr|B4DSN5|B4DSN5_HUMAN Isoform of P18031, Tyrosine-protein phosphatase non-receptor type OS=Homo sapiens OX=9606 GN=PTPN1 PE=1 SV=1;sp|P18031|PTN1_HUMAN Tyrosine-protein phosphatase non-receptor type 1 OS=Homo sapiens OX=9606 GN=PTPN1 PE=1 SV=1	2	1	1	1	0	0	1	0	0	0	1	0	0	0	1	0	3	3	3	41.26	362	362;435	0.00082271	2.5124	0.94208	1.273	NaN	1	0	Median	NaN	NaN	0.94208	NaN	NaN	NaN	1.273	NaN
SUPT20H	Transcription factor SPT20 homolog	NaN	NaN	NaN	NaN	B4E2D5;R4GND2;F6S7C4;Q8NEM7-2;Q8NEM7;Q8NEM7-3	B4E2D5;R4GND2;F6S7C4;Q8NEM7-2;Q8NEM7;Q8NEM7-3	1;1;1;1;1;1	1;1;1;1;1;1	1;1;1;1;1;1	tr|B4E2D5|B4E2D5_HUMAN Isoform of Q8NEM7, Transcription factor SPT20 homolog OS=Homo sapiens OX=9606 GN=SUPT20H PE=1 SV=1;tr|R4GND2|R4GND2_HUMAN Isoform of Q8NEM7, Transcription factor SPT20 homolog OS=Homo sapiens OX=9606 GN=SUPT20H PE=1 SV=1;tr|F6S7C4|F6	6	1	1	1	0	0	0	1	0	0	0	1	0	0	0	1	3	3	3	56.056	498	498;522;736;733;779;811	0.00080645	2.3627	NaN	NaN	NaN	0	0	Median	NaN	NaN	NaN	NaN	NaN	NaN	NaN	NaN
PREB	Prolactin regulatory element-binding protein	NaN	NaN	NaN	NaN	B5MC98;Q9HCU5	B5MC98;Q9HCU5	1;1	1;1	1;1	tr|B5MC98|B5MC98_HUMAN Isoform of Q9HCU5, Prolactin regulatory element-binding protein OS=Homo sapiens OX=9606 GN=PREB PE=1 SV=1;sp|Q9HCU5|PREB_HUMAN Prolactin regulatory element-binding protein OS=Homo sapiens OX=9606 GN=PREB PE=1 SV=2	2	1	1	1	0	1	1	0	0	1	1	0	0	1	1	0	5	5	5	38.939	359	359;417	0	16.334	NaN	NaN	NaN	0	0	Median	NaN	NaN	NaN	NaN	NaN	NaN	NaN	NaN
CBX1	Chromobox protein homolog 1	NaN	NaN	NaN	NaN	K7ELA4;B5MD17;J3KS05;P83916;C9JWS9	K7ELA4;B5MD17;J3KS05;P83916;C9JWS9	2;2;2;2;1	1;1;1;1;1	1;1;1;1;1	tr|K7ELA4|K7ELA4_HUMAN Isoform of P83916, Chromobox protein homolog 1 OS=Homo sapiens OX=9606 GN=CBX1 PE=1 SV=1;tr|B5MD17|B5MD17_HUMAN Isoform of P83916, Chromobox protein homolog 1 (Fragment) OS=Homo sapiens OX=9606 GN=CBX1 PE=1 SV=1;tr|J3KS05|J3KS05_HUMA	5	2	1	1	1	1	2	0	0	0	1	0	0	0	1	0	23.9	12.3	12.3	15.981	138	138;168;173;185;110	0	15.444	NaN	NaN	NaN	0	0	Median	NaN	NaN	NaN	NaN	NaN	NaN	NaN	NaN
REEP5	Receptor expression-enhancing protein;Receptor expression-enhancing protein 5	NaN	NaN	NaN	NaN	B7Z332;B7Z510;Q00765-2;Q00765	B7Z332;B7Z510;Q00765-2;Q00765	1;1;1;1	1;1;1;1	1;1;1;1	tr|B7Z332|B7Z332_HUMAN Isoform of Q00765, cDNA FLJ50528, moderately similar to Receptor expression-enhancing protein 5 OS=Homo sapiens OX=9606 GN=REEP5 PE=1 SV=1;tr|B7Z510|B7Z510_HUMAN Isoform of Q00765, Receptor expression-enhancing protein OS=Homo sapien	4	1	1	1	0	1	0	0	0	1	0	0	0	1	0	0	11.1	11.1	11.1	10.576	99	99;122;131;189	1	-2	NaN	NaN	NaN	0	0	Median	NaN	NaN	NaN	NaN	NaN	NaN	NaN	NaN
CUTA	Protein CutA	NaN	NaN	1.7003	NaN	C9IZG4;O60888-3;O60888;O60888-2	C9IZG4;O60888-3;O60888;O60888-2	1;1;1;1	1;1;1;1	1;1;1;1	tr|C9IZG4|C9IZG4_HUMAN Isoform of O60888, Protein CutA OS=Homo sapiens OX=9606 GN=CUTA PE=1 SV=1;sp|O60888-3|CUTA-3_HUMAN Isoform of O60888, Isoform C of Protein CutA OS=Homo sapiens OX=9606 GN=CUTA PE=1 SV=2;sp|O60888|CUTA_HUMAN Protein CutA OS=Homo sapie	4	1	1	1	0	0	1	0	0	0	1	0	0	0	1	0	10.4	10.4	10.4	14.401	135	135;156;179;198	0	6.2539	0.8832	1.7003	NaN	1	1	Median	NaN	NaN	0.8832	NaN	NaN	NaN	1.7003	NaN
CSTA	Cystatin-A;Cystatin-A, N-terminally processed	NaN	NaN	NaN	NaN	C9J0E4;P01040	C9J0E4;P01040	1;1	1;1	1;1	tr|C9J0E4|C9J0E4_HUMAN Isoform of P01040, Cystatin-A OS=Homo sapiens OX=9606 GN=CSTA PE=1 SV=1;sp|P01040|CYTA_HUMAN Cystatin-A OS=Homo sapiens OX=9606 GN=CSTA PE=1 SV=1	2	1	1	1	0	1	1	0	0	1	1	0	0	1	1	0	33.3	33.3	33.3	7.0861	63	63;98	0.0023374	2.0842	NaN	NaN	NaN	0	0	Median	NaN	NaN	NaN	NaN	NaN	NaN	NaN	NaN
GTF2E1	General transcription factor IIE subunit 1	NaN	NaN	0.52134	NaN	C9J329;E9PER7;P29083	C9J329;E9PER7;P29083	1;1;1	1;1;1	1;1;1	tr|C9J329|C9J329_HUMAN Isoform of P29083, General transcription factor IIE subunit 1 (Fragment) OS=Homo sapiens OX=9606 GN=GTF2E1 PE=1 SV=1;tr|E9PER7|E9PER7_HUMAN Isoform of P29083, General transcription factor IIE subunit 1 (Fragment) OS=Homo sapiens OX=9	3	1	1	1	0	0	1	0	0	0	1	0	0	0	1	0	30.6	30.6	30.6	5.5024	49	49;122;439	0.00081633	2.4481	0.39473	0.52134	NaN	1	0	Median	NaN	NaN	0.39473	NaN	NaN	NaN	0.52134	NaN
PDCD10	Programmed cell death protein 10	NaN	NaN	0.96023	NaN	C9J363;Q9BUL8	C9J363;Q9BUL8	1;1	1;1	1;1	tr|C9J363|C9J363_HUMAN Isoform of Q9BUL8, Programmed cell death 10, isoform CRA_b OS=Homo sapiens OX=9606 GN=PDCD10 PE=1 SV=1;sp|Q9BUL8|PDC10_HUMAN Programmed cell death protein 10 OS=Homo sapiens OX=9606 GN=PDCD10 PE=1 SV=1	2	1	1	1	0	0	1	0	0	0	1	0	0	0	1	0	8.7	8.7	8.7	17.534	149	149;212	0.0038226	1.962	0.5437	0.96023	NaN	1	0	Median	NaN	NaN	0.5437	NaN	NaN	NaN	0.96023	NaN
PTGES3L-AARSD1;AARSD1	Alanyl-tRNA editing protein Aarsd1	NaN	NaN	1.2103	NaN	C9J5N1;Q9BTE6;Q9BTE6-2;Q9BTE6-3;L7N2F4	C9J5N1;Q9BTE6;Q9BTE6-2;Q9BTE6-3;L7N2F4	2;2;2;2;1	2;2;2;2;1	2;2;2;2;1	tr|C9J5N1|C9J5N1_HUMAN Isoform of Q9BTE6, PTGES3L-AARSD1 readthrough OS=Homo sapiens OX=9606 GN=PTGES3L-AARSD1 PE=1 SV=1;sp|Q9BTE6|AASD1_HUMAN Alanyl-tRNA editing protein Aarsd1 OS=Homo sapiens OX=9606 GN=AARSD1 PE=1 SV=2;sp|Q9BTE6-2|AASD1-2_HUMAN Isoform	5	2	2	2	0	0	2	0	0	0	2	0	0	0	2	0	7.1	7.1	7.1	55.065	495	495;412;525;586;140	0	3.5518	0.95069	1.2103	NaN	1	0	Median	NaN	NaN	0.95069	NaN	NaN	NaN	1.2103	NaN
OXSR1	Serine/threonine-protein kinase OSR1	NaN	NaN	1.0918	NaN	O95747;C9JIG9;F8WBK9	O95747;C9JIG9	3;3;1	3;3;1	3;3;1	sp|O95747|OXSR1_HUMAN Serine/threonine-protein kinase OSR1 OS=Homo sapiens OX=9606 GN=OXSR1 PE=1 SV=1;tr|C9JIG9|C9JIG9_HUMAN Isoform of O95747, Serine/threonine-protein kinase OSR1 OS=Homo sapiens OX=9606 GN=OXSR1 PE=1 SV=1	3	3	3	3	0	0	2	1	0	0	2	1	0	0	2	1	7.6	7.6	7.6	58.022	527	527;468;113	0.0019889	2.2603	0.82798	1.0918	5.9623	2	0	Median	NaN	NaN	0.82798	NaN	NaN	NaN	1.0918	NaN
UBXN4	UBX domain-containing protein 4	NaN	NaN	0.81727	NaN	F8WB86;Q6PJ80;C9JLR4;Q92575	F8WB86;Q6PJ80;C9JLR4;Q92575	1;1;1;1	1;1;1;1	1;1;1;1	tr|F8WB86|F8WB86_HUMAN Isoform of Q92575, UBX domain-containing protein 4 OS=Homo sapiens OX=9606 GN=UBXN4 PE=1 SV=1;tr|Q6PJ80|Q6PJ80_HUMAN Isoform of Q92575, UBX domain-containing protein 4 OS=Homo sapiens OX=9606 GN=UBXN4 PE=1 SV=1;tr|C9JLR4|C9JLR4_HUMAN	4	1	1	1	0	0	1	0	0	0	1	0	0	0	1	0	24.6	24.6	24.6	6.9849	65	65;95;117;508	0.00081466	2.4291	0.66769	0.81727	NaN	1	0	Median	NaN	NaN	0.66769	NaN	NaN	NaN	0.81727	NaN
FAM3C	Protein FAM3C	NaN	NaN	1.5181	NaN	C9JP35;C9JMN4;Q92520	C9JP35;C9JMN4;Q92520	1;1;1	1;1;1	1;1;1	tr|C9JP35|C9JP35_HUMAN Isoform of Q92520, Protein FAM3C (Fragment) OS=Homo sapiens OX=9606 GN=FAM3C PE=1 SV=1;tr|C9JMN4|C9JMN4_HUMAN Isoform of Q92520, Protein FAM3C (Fragment) OS=Homo sapiens OX=9606 GN=FAM3C PE=1 SV=1;sp|Q92520|FAM3C_HUMAN Protein FAM3C	3	1	1	1	0	0	1	0	0	0	1	0	0	0	1	0	11.9	11.9	11.9	11.596	109	109;151;227	0.0044994	1.822	0.92194	1.5181	NaN	1	0	Median	NaN	NaN	0.92194	NaN	NaN	NaN	1.5181	NaN
RHOC;RHOA;RHOB	Transforming protein RhoA;Rho-related GTP-binding protein RhoC;Rho-related GTP-binding protein RhoB	NaN	NaN	1.2471	NaN	Q5JR06;Q5JR07;E9PN11;C9JNR4;E9PQH6;C9JX21;Q5JR08;Q5JR05;U3KQA9;U3KQV3;P61586;P08134;P62745	Q5JR06;Q5JR07;E9PN11;C9JNR4;E9PQH6;C9JX21;Q5JR08;Q5JR05;U3KQA9;U3KQV3;P61586;P08134;P62745	1;1;1;1;1;1;1;1;1;1;1;1;1	1;1;1;1;1;1;1;1;1;1;1;1;1	1;1;1;1;1;1;1;1;1;1;1;1;1	tr|Q5JR06|Q5JR06_HUMAN Isoform of P08134, Rho-related GTP-binding protein RhoC (Fragment) OS=Homo sapiens OX=9606 GN=RHOC PE=4 SV=8;tr|Q5JR07|Q5JR07_HUMAN Isoform of P08134, Rho-related GTP-binding protein RhoC (Fragment) OS=Homo sapiens OX=9606 GN=RHOC PE	13	1	1	1	0	0	1	0	0	0	1	0	0	0	1	0	18.7	18.7	18.7	10.164	91	91;127;129;129;169;187;188;199;248;271;193;193;196	0	18.506	0.85362	1.2471	NaN	1	0	Median	NaN	NaN	0.85362	NaN	NaN	NaN	1.2471	NaN
POLR2B		NaN	NaN	NaN	NaN	C9JZW8	C9JZW8	2	1	1	tr|C9JZW8|C9JZW8_HUMAN Isoform of P30876, DNA-directed RNA polymerase II subunit RPB2 (Fragment) OS=Homo sapiens OX=9606 GN=POLR2B PE=1 SV=1	1	2	1	1	0	1	1	0	0	1	0	0	0	1	0	0	55.3	34.2	34.2	8.8456	76	76	1	-2	NaN	NaN	NaN	0	0	Median	NaN	NaN	NaN	NaN	NaN	NaN	NaN	NaN
APOB		NaN	NaN	NaN	NaN	CON__ENSEMBL:ENSBTAP00000032840;A8MUN2	CON__ENSEMBL:ENSBTAP00000032840;A8MUN2	2;1	2;1	1;0	;tr|A8MUN2|A8MUN2_HUMAN Isoform of P04114, Apolipoprotein B-100 OS=Homo sapiens OX=9606 GN=APOB PE=1 SV=2	2	2	2	1	1	2	0	0	1	2	0	0	1	1	0	0	3.4	3.4	1.9	92.273	825	825;828	0.0023283	2.054	NaN	NaN	NaN	0	0	Median	NaN	NaN	NaN	NaN	NaN	NaN	NaN	NaN
KRT6C	Keratin, type II cytoskeletal 6C	NaN	NaN	NaN	NaN	CON__P48668;P48668	CON__P48668;P48668	24;24	1;1	0;0	;sp|P48668|K2C6C_HUMAN Keratin, type II cytoskeletal 6C OS=Homo sapiens OX=9606 GN=KRT6C PE=1 SV=3	2	24	1	0	15	18	10	13	1	1	0	1	0	0	0	0	45	3	0	60.024	564	564;564	0	3.9425	NaN	NaN	NaN	0	0	Median	NaN	NaN	NaN	NaN	NaN	NaN	NaN	NaN
		NaN	NaN	NaN	NaN	CON__Q6IFZ6	CON__Q6IFZ6	5	1	0		1	5	1	0	2	4	2	3	0	0	0	1	0	0	0	0	7.2	2.1	0	61.358	572	572	0.0023104	2.0201	NaN	NaN	NaN	0	0	Median	NaN	NaN	NaN	NaN	NaN	NaN	NaN	NaN
KRT80	Keratin, type II cytoskeletal 80	NaN	NaN	0.3269	NaN	CON__Q6KB66-1;Q6KB66-2;Q6KB66;Q6KB66-3	CON__Q6KB66-1;Q6KB66-2;Q6KB66;Q6KB66-3	2;2;2;1	2;2;2;1	2;2;2;1	;sp|Q6KB66-2|K2C80-2_HUMAN Isoform of Q6KB66, Isoform 2 of Keratin, type II cytoskeletal 80 OS=Homo sapiens OX=9606 GN=KRT80 PE=1 SV=2;sp|Q6KB66|K2C80_HUMAN Keratin, type II cytoskeletal 80 OS=Homo sapiens OX=9606 GN=KRT80 PE=1 SV=2;sp|Q6KB66-3|K2C80-3_HUM	4	2	2	2	1	1	2	1	1	1	2	1	1	1	2	1	5.3	5.3	5.3	50.525	452	452;422;452;487	0.005948	1.7325	0.26936	0.3269	NaN	1	1	Median	NaN	NaN	0.26936	NaN	NaN	NaN	0.3269	NaN
HMGB2	High mobility group protein B2	NaN	NaN	0.88967	NaN	D6R9A6;P26583	D6R9A6;P26583	2;2	1;1	1;1	tr|D6R9A6|D6R9A6_HUMAN Isoform of P26583, High mobility group protein B2 (Fragment) OS=Homo sapiens OX=9606 GN=HMGB2 PE=1 SV=1;sp|P26583|HMGB2_HUMAN High mobility group protein B2 OS=Homo sapiens OX=9606 GN=HMGB2 PE=1 SV=2	2	2	1	1	0	0	2	0	0	0	1	0	0	0	1	0	18.7	9.7	9.7	15.404	134	134;209	0.009612	1.4713	0.45117	0.88967	NaN	1	0	Median	NaN	NaN	0.45117	NaN	NaN	NaN	0.88967	NaN
EXOC3	Exocyst complex component 3	NaN	NaN	0.88515	NaN	D6RB59;H0Y995;O60645	D6RB59;H0Y995;O60645	2;2;2	2;2;2	2;2;2	tr|D6RB59|D6RB59_HUMAN Isoform of O60645, Exocyst complex component 3 OS=Homo sapiens OX=9606 GN=EXOC3 PE=1 SV=1;tr|H0Y995|H0Y995_HUMAN Isoform of O60645, Exocyst complex component 3 (Fragment) OS=Homo sapiens OX=9606 GN=EXOC3 PE=1 SV=1;sp|O60645|EXOC3_HUM	3	2	2	2	0	0	2	0	0	0	2	0	0	0	2	0	5.4	5.4	5.4	53.241	462	462;473;745	0.0096085	1.4696	0.69169	0.88515	NaN	1	0	Median	NaN	NaN	0.69169	NaN	NaN	NaN	0.88515	NaN
HSD17B11	Estradiol 17-beta-dehydrogenase 11	NaN	NaN	NaN	NaN	D6RCD0;Q8NBQ5	D6RCD0;Q8NBQ5	1;1	1;1	1;1	tr|D6RCD0|D6RCD0_HUMAN Isoform of Q8NBQ5, Estradiol 17-beta-dehydrogenase 11 OS=Homo sapiens OX=9606 GN=HSD17B11 PE=1 SV=2;sp|Q8NBQ5|DHB11_HUMAN Estradiol 17-beta-dehydrogenase 11 OS=Homo sapiens OX=9606 GN=HSD17B11 PE=1 SV=3	2	1	1	1	0	1	1	0	0	1	1	0	0	1	1	0	7	7	7	28.102	256	256;300	0	28.331	NaN	NaN	NaN	0	0	Median	NaN	NaN	NaN	NaN	NaN	NaN	NaN	NaN
UBE2V2;UBE2V1;TMEM189-UBE2V1	Ubiquitin-conjugating enzyme E2 variant 1;Ubiquitin-conjugating enzyme E2 variant 2	NaN	NaN	1.9363	NaN	E5RIF1;D6RG00;H0YBX6;I3L0A0;Q13404-8;Q15819;Q13404;Q13404-7;Q13404-2;Q13404-1	E5RIF1;D6RG00;H0YBX6;I3L0A0;Q13404-8;Q15819;Q13404;Q13404-7;Q13404-2;Q13404-1	1;1;1;1;1;1;1;1;1;1	1;1;1;1;1;1;1;1;1;1	1;1;1;1;1;1;1;1;1;1	tr|E5RIF1|E5RIF1_HUMAN Isoform of Q15819, Ubiquitin-conjugating enzyme E2 variant 2 (Fragment) OS=Homo sapiens OX=9606 GN=UBE2V2 PE=4 SV=1;tr|D6RG00|D6RG00_HUMAN Isoform of Q13404, HCG2018358, isoform CRA_d OS=Homo sapiens OX=9606 GN=UBE2V1 PE=4 SV=2;tr|H0	10	1	1	1	0	0	1	0	0	0	1	0	0	0	1	0	19.2	19.2	19.2	5.7715	52	52;89;154;370;105;145;147;170;170;221	0.0038066	1.9411	1.0117	1.9363	NaN	1	0	Median	NaN	NaN	1.0117	NaN	NaN	NaN	1.9363	NaN
HAVCR2		NaN	NaN	NaN	NaN	E5RFR4	E5RFR4	1	1	1	tr|E5RFR4|E5RFR4_HUMAN Isoform of Q8TDQ0, Hepatitis A virus cellular receptor 2 (Fragment) OS=Homo sapiens OX=9606 GN=HAVCR2 PE=4 SV=1	1	1	1	1	1	0	0	0	1	0	0	0	1	0	0	0	12.2	12.2	12.2	8.2053	74	74	1	-2	NaN	NaN	NaN	0	0	Median	NaN	NaN	NaN	NaN	NaN	NaN	NaN	NaN
PLAA	Phospholipase A-2-activating protein	NaN	NaN	NaN	NaN	E5RIM3;Q9Y263	E5RIM3;Q9Y263	1;1	1;1	1;1	tr|E5RIM3|E5RIM3_HUMAN Isoform of Q9Y263, Phospholipase A-2-activating protein OS=Homo sapiens OX=9606 GN=PLAA PE=1 SV=1;sp|Q9Y263|PLAP_HUMAN Phospholipase A-2-activating protein OS=Homo sapiens OX=9606 GN=PLAA PE=1 SV=2	2	1	1	1	1	0	0	0	1	0	0	0	1	0	0	0	2.5	2.5	2.5	66.734	609	609;795	0.0082943	1.5486	NaN	NaN	NaN	0	0	Median	NaN	NaN	NaN	NaN	NaN	NaN	NaN	NaN
POR	NADPH--cytochrome P450 reductase	NaN	NaN	0.90842	NaN	E7EMD0;H0Y4R2;P16435	E7EMD0;H0Y4R2;P16435	1;1;1	1;1;1	1;1;1	tr|E7EMD0|E7EMD0_HUMAN Isoform of P16435, NADPH--cytochrome P450 reductase OS=Homo sapiens OX=9606 GN=POR PE=1 SV=1;tr|H0Y4R2|H0Y4R2_HUMAN Isoform of P16435, NADPH--cytochrome P450 reductase (Fragment) OS=Homo sapiens OX=9606 GN=POR PE=1 SV=1;sp|P16435|NCP	3	1	1	1	0	1	1	0	0	1	1	0	0	1	1	0	5.5	5.5	5.5	47.401	418	418;725;677	0	4.0524	0.61674	0.90842	NaN	1	0	Median	NaN	NaN	0.61674	NaN	NaN	NaN	0.90842	NaN
CUL9	Cullin-9	NaN	NaN	0.94303	NaN	E9PEZ1;Q8IWT3-3;Q8IWT3	E9PEZ1;Q8IWT3-3;Q8IWT3	1;1;1	1;1;1	1;1;1	tr|E9PEZ1|E9PEZ1_HUMAN Isoform of Q8IWT3, Cullin-9 OS=Homo sapiens OX=9606 GN=CUL9 PE=1 SV=1;sp|Q8IWT3-3|CUL9-3_HUMAN Isoform of Q8IWT3, Isoform 2 of Cullin-9 OS=Homo sapiens OX=9606 GN=CUL9 PE=1 SV=2;sp|Q8IWT3|CUL9_HUMAN Cullin-9 OS=Homo sapiens OX=9606 G	3	1	1	1	0	0	1	0	0	0	1	0	0	0	1	0	0.5	0.5	0.5	278.13	2489	2489;2407;2517	0.0089574	1.5026	0.81301	0.94303	NaN	1	0	Median	NaN	NaN	0.81301	NaN	NaN	NaN	0.94303	NaN
EGFR	Receptor protein-tyrosine kinase;Epidermal growth factor receptor	NaN	NaN	NaN	NaN	Q504U8;E9PFD7;P00533	Q504U8;E9PFD7;P00533	1;1;1	1;1;1	1;1;1	tr|Q504U8|Q504U8_HUMAN Isoform of P00533, Receptor protein-tyrosine kinase OS=Homo sapiens OX=9606 GN=EGFR PE=1 SV=1;tr|E9PFD7|E9PFD7_HUMAN Isoform of P00533, Receptor protein-tyrosine kinase OS=Homo sapiens OX=9606 GN=EGFR PE=1 SV=3;sp|P00533|EGFR_HUMAN E	3	1	1	1	1	0	0	0	1	0	0	0	1	0	0	0	1.7	1.7	1.7	120.69	1091	1091;1165;1210	0	22.809	NaN	NaN	NaN	0	0	Median	NaN	NaN	NaN	NaN	NaN	NaN	NaN	NaN
CEP97	Centrosomal protein of 97 kDa	NaN	NaN	0.92005	NaN	H7C4Y5;E9PG22;Q8IW35;Q8IW35-2	H7C4Y5;E9PG22;Q8IW35;Q8IW35-2	1;1;1;1	1;1;1;1	1;1;1;1	tr|H7C4Y5|H7C4Y5_HUMAN Isoform of Q8IW35, Centrosomal protein of 97 kDa (Fragment) OS=Homo sapiens OX=9606 GN=CEP97 PE=1 SV=1;tr|E9PG22|E9PG22_HUMAN Isoform of Q8IW35, Centrosomal protein of 97 kDa OS=Homo sapiens OX=9606 GN=CEP97 PE=1 SV=1;sp|Q8IW35|CEP97	4	1	1	1	0	0	1	0	0	0	1	0	0	0	1	0	7.4	7.4	7.4	19.511	175	175;806;865;891	0.0045011	1.8226	0.60234	0.92005	NaN	1	0	Median	NaN	NaN	0.60234	NaN	NaN	NaN	0.92005	NaN
HAX1	HCLS1-associated protein X-1	NaN	NaN	NaN	NaN	E9PIQ7;O00165-5;O00165-3;O00165;O00165-2	E9PIQ7;O00165-5;O00165-3;O00165;O00165-2	1;1;1;1;1	1;1;1;1;1	1;1;1;1;1	tr|E9PIQ7|E9PIQ7_HUMAN Isoform of O00165, HCLS1-associated protein X-1 OS=Homo sapiens OX=9606 GN=HAX1 PE=1 SV=1;sp|O00165-5|HAX1-5_HUMAN Isoform of O00165, Isoform 5 of HCLS1-associated protein X-1 OS=Homo sapiens OX=9606 GN=HAX1 PE=1 SV=2;sp|O00165-3|HAX	5	1	1	1	0	1	0	0	0	1	0	0	0	1	0	0	16.6	16.6	16.6	17.167	151	151;231;253;279;287	0.00044287	3.3422	NaN	NaN	NaN	0	0	Median	NaN	NaN	NaN	NaN	NaN	NaN	NaN	NaN
AMPD3	AMP deaminase 3	NaN	NaN	1.684	NaN	E9PKC5;Q01432-6;Q01432-3;Q01432;Q01432-5;Q01432-4	E9PKC5;Q01432-6;Q01432-3;Q01432;Q01432-5;Q01432-4	1;1;1;1;1;1	1;1;1;1;1;1	1;1;1;1;1;1	tr|E9PKC5|E9PKC5_HUMAN Isoform of Q01432, AMP deaminase OS=Homo sapiens OX=9606 GN=AMPD3 PE=1 SV=1;sp|Q01432-6|AMPD3-6_HUMAN Isoform of Q01432, Isoform 4 of AMP deaminase 3 OS=Homo sapiens OX=9606 GN=AMPD3 PE=1 SV=1;sp|Q01432-3|AMPD3-3_HUMAN Isoform of Q01	6	1	1	1	0	0	1	0	0	0	1	0	0	0	1	0	1.6	1.6	1.6	78.492	677	677;608;658;767;774;776	0.0098975	1.4375	1.3209	1.684	NaN	1	0	Median	NaN	NaN	1.3209	NaN	NaN	NaN	1.684	NaN
ME3	Malic enzyme;NADP-dependent malic enzyme, mitochondrial	NaN	NaN	0.97992	NaN	E9PMB9;Q16798	E9PMB9;Q16798	1;1	1;1	1;1	tr|E9PMB9|E9PMB9_HUMAN Isoform of Q16798, Malic enzyme (Fragment) OS=Homo sapiens OX=9606 GN=ME3 PE=1 SV=8;sp|Q16798|MAON_HUMAN NADP-dependent malic enzyme, mitochondrial OS=Homo sapiens OX=9606 GN=ME3 PE=2 SV=2	2	1	1	1	0	0	1	0	0	0	1	0	0	0	1	0	3.3	3.3	3.3	64.277	580	580;604	0.009289	1.4907	0.60907	0.97992	NaN	1	0	Median	NaN	NaN	0.60907	NaN	NaN	NaN	0.97992	NaN
MTFR2	Mitochondrial fission regulator 2	NaN	NaN	NaN	NaN	E9PN39;Q6P444	E9PN39;Q6P444	1;1	1;1	1;1	tr|E9PN39|E9PN39_HUMAN Isoform of Q6P444, Mitochondrial fission regulator 2 (Fragment) OS=Homo sapiens OX=9606 GN=MTFR2 PE=1 SV=1;sp|Q6P444|MTFR2_HUMAN Mitochondrial fission regulator 2 OS=Homo sapiens OX=9606 GN=MTFR2 PE=1 SV=2	2	1	1	1	1	1	1	0	1	1	1	0	1	1	1	0	7.8	7.8	7.8	27.233	245	245;385	1	-2	NaN	NaN	NaN	0	0	Median	NaN	NaN	NaN	NaN	NaN	NaN	NaN	NaN
STX5	Syntaxin-5	NaN	NaN	1.2348	NaN	E9PNU4;Q13190-3;Q13190-2;Q13190-4;Q13190	E9PNU4;Q13190-3;Q13190-2;Q13190-4;Q13190	1;1;1;1;1	1;1;1;1;1	1;1;1;1;1	tr|E9PNU4|E9PNU4_HUMAN Isoform of Q13190, Syntaxin-5 OS=Homo sapiens OX=9606 GN=STX5 PE=1 SV=1;sp|Q13190-3|STX5-3_HUMAN Isoform of Q13190, Isoform 3 of Syntaxin-5 OS=Homo sapiens OX=9606 GN=STX5 PE=1 SV=2;sp|Q13190-2|STX5-2_HUMAN Isoform of Q13190, Isoform	5	1	1	1	0	0	1	0	0	0	1	0	0	0	1	0	4.8	4.8	4.8	27.842	250	250;267;301;321;355	0.0066815	1.7119	0.97128	1.2348	NaN	1	0	Median	NaN	NaN	0.97128	NaN	NaN	NaN	1.2348	NaN
DPP3	Dipeptidyl peptidase 3	NaN	NaN	1.3478	NaN	E9PQ14;G3V1D3;G3V180;Q9NY33-4;Q9NY33;E9PNX5;E9PKK8;E9PPK9	E9PQ14;G3V1D3;G3V180;Q9NY33-4;Q9NY33;E9PNX5;E9PKK8;E9PPK9	2;2;2;2;2;1;1;1	2;2;2;2;2;1;1;1	2;2;2;2;2;1;1;1	tr|E9PQ14|E9PQ14_HUMAN Isoform of Q9NY33, Dipeptidyl peptidase 3 (Fragment) OS=Homo sapiens OX=9606 GN=DPP3 PE=1 SV=1;tr|G3V1D3|G3V1D3_HUMAN Isoform of Q9NY33, Dipeptidyl peptidase 3 OS=Homo sapiens OX=9606 GN=DPP3 PE=1 SV=1;tr|G3V180|G3V180_HUMAN Isoform	8	2	2	2	1	0	2	0	1	0	2	0	1	0	2	0	19.8	19.8	19.8	19.819	177	177;756;757;707;737;104;170;201	0	6.2848	0.91987	1.3478	6.1765	2	1	Median	NaN	NaN	0.91987	NaN	NaN	NaN	1.3478	NaN
COA1		NaN	NaN	NaN	NaN	F2Z2D1	F2Z2D1	1	1	1	tr|F2Z2D1|F2Z2D1_HUMAN Isoform of Q9GZY4, Cytochrome c oxidase assembly factor 1 homolog OS=Homo sapiens OX=9606 GN=COA1 PE=4 SV=1	1	1	1	1	0	1	0	0	0	1	0	0	0	1	0	0	50	50	50	4.0838	34	34	1	-2	NaN	NaN	NaN	0	0	Median	NaN	NaN	NaN	NaN	NaN	NaN	NaN	NaN
ASH2L	Set1/Ash2 histone methyltransferase complex subunit ASH2	NaN	NaN	NaN	NaN	F5H8F7;Q9UBL3-2;Q9UBL3-3;Q9UBL3	F5H8F7;Q9UBL3-2;Q9UBL3-3;Q9UBL3	1;1;1;1	1;1;1;1	1;1;1;1	tr|F5H8F7|F5H8F7_HUMAN Isoform of Q9UBL3, Set1/Ash2 histone methyltransferase complex subunit ASH2 OS=Homo sapiens OX=9606 GN=ASH2L PE=1 SV=1;sp|Q9UBL3-2|ASH2L-2_HUMAN Isoform of Q9UBL3, Isoform 2 of Set1/Ash2 histone methyltransferase complex subunit ASH2	4	1	1	1	0	0	1	0	0	0	1	0	0	0	1	0	3.9	3.9	3.9	55.324	489	489;501;534;628	0.0066568	1.6915	NaN	NaN	NaN	0	0	Median	NaN	NaN	NaN	NaN	NaN	NaN	NaN	NaN
ALDH2	Aldehyde dehydrogenase, mitochondrial	NaN	NaN	0.55831	NaN	F8VP50;P05091-2;P05091	F8VP50;P05091-2;P05091	1;1;1	1;1;1	1;1;1	tr|F8VP50|F8VP50_HUMAN Uncharacterized protein (Fragment) OS=Homo sapiens OX=9606 PE=4 SV=3;sp|P05091-2|ALDH2-2_HUMAN Isoform of P05091, Isoform 2 of Aldehyde dehydrogenase, mitochondrial OS=Homo sapiens OX=9606 GN=ALDH2 PE=1 SV=2;sp|P05091|ALDH2_HUMAN Ald	3	1	1	1	0	0	1	0	0	0	1	0	0	0	1	0	6.6	6.6	6.6	28.259	259	259;470;517	0.00522	1.78	0.4694	0.55831	NaN	1	0	Median	NaN	NaN	0.4694	NaN	NaN	NaN	0.55831	NaN
NUP37	Nucleoporin Nup37	NaN	NaN	NaN	NaN	F8VTY2;Q8NFH4	F8VTY2;Q8NFH4	1;1	1;1	1;1	tr|F8VTY2|F8VTY2_HUMAN Isoform of Q8NFH4, Nucleoporin Nup37 (Fragment) OS=Homo sapiens OX=9606 GN=NUP37 PE=1 SV=8;sp|Q8NFH4|NUP37_HUMAN Nucleoporin Nup37 OS=Homo sapiens OX=9606 GN=NUP37 PE=1 SV=1	2	1	1	1	0	0	0	1	0	0	0	1	0	0	0	1	8.2	8.2	8.2	23.266	208	208;326	0.0023238	2.0481	NaN	NaN	NaN	0	0	Median	NaN	NaN	NaN	NaN	NaN	NaN	NaN	NaN
SCAF11	Protein SCAF11	NaN	NaN	0.46889	NaN	F8VXG7;Q99590-2;Q99590;A0A087WTB7;A0A0A0MTP7	F8VXG7;Q99590-2;Q99590;A0A087WTB7;A0A0A0MTP7	2;2;2;1;1	2;2;2;1;1	2;2;2;1;1	tr|F8VXG7|F8VXG7_HUMAN Isoform of Q99590, Protein SCAF11 OS=Homo sapiens OX=9606 GN=SCAF11 PE=1 SV=1;sp|Q99590-2|SCAFB-2_HUMAN Isoform of Q99590, Isoform 2 of Protein SCAF11 OS=Homo sapiens OX=9606 GN=SCAF11 PE=1 SV=2;sp|Q99590|SCAFB_HUMAN Protein SCAF11 O	5	2	2	2	0	0	2	0	0	0	2	0	0	0	2	0	1.8	1.8	1.8	142.6	1271	1271;1148;1463;152;935	0.002313	2.023	0.34846	0.46889	18.327	3	2	Plateau	NaN	NaN	0.34846	NaN	NaN	NaN	0.46889	NaN
C19orf12		NaN	NaN	0.99668	NaN	F8W6J3;K7EPS8;Q9NSK7-3;Q9NSK7-4	F8W6J3;K7EPS8;Q9NSK7-3;Q9NSK7-4	1;1;1;1	1;1;1;1	1;1;1;1	tr|F8W6J3|F8W6J3_HUMAN Isoform of Q9NSK7, Protein C19orf12 OS=Homo sapiens OX=9606 GN=C19orf12 PE=1 SV=2;tr|K7EPS8|K7EPS8_HUMAN Isoform of Q9NSK7, Protein C19orf12 (Fragment) OS=Homo sapiens OX=9606 GN=C19orf12 PE=1 SV=1;sp|Q9NSK7-3|CS012-3_HUMAN Isoform o	4	1	1	1	0	0	1	1	0	0	1	1	0	0	1	1	14.7	14.7	14.7	7.0044	68	68;106;107;141	1	-2	0.63811	0.99668	NaN	1	0	Median	NaN	NaN	0.63811	NaN	NaN	NaN	0.99668	NaN
ZNF687	Zinc finger protein 687	NaN	NaN	1.0046	NaN	F8WCX2;Q8N1G0-2;Q8N1G0;H0Y5I5	F8WCX2;Q8N1G0-2;Q8N1G0;H0Y5I5	2;2;2;1	2;2;2;1	2;2;2;1	tr|F8WCX2|F8WCX2_HUMAN Isoform of Q8N1G0, Zinc finger protein 687 OS=Homo sapiens OX=9606 GN=ZNF687 PE=1 SV=1;sp|Q8N1G0-2|ZN687-2_HUMAN Isoform of Q8N1G0, Isoform 2 of Zinc finger protein 687 OS=Homo sapiens OX=9606 GN=ZNF687 PE=1 SV=1;sp|Q8N1G0|ZN687_HUMA	4	2	2	2	0	0	2	0	0	0	2	0	0	0	2	0	2.9	2.9	2.9	80.819	785	785;1103;1237;706	0.000814	2.427	0.64281	1.0046	7.0633	2	0	Median	NaN	NaN	0.64281	NaN	NaN	NaN	1.0046	NaN
ZNF443	Zinc finger protein 443	NaN	NaN	NaN	NaN	F8WDY2;Q9Y2A4	F8WDY2;Q9Y2A4	1;1	1;1	1;1	tr|F8WDY2|F8WDY2_HUMAN Isoform of Q9Y2A4, Zinc finger protein 443 OS=Homo sapiens OX=9606 GN=ZNF443 PE=4 SV=1;sp|Q9Y2A4|ZN443_HUMAN Zinc finger protein 443 OS=Homo sapiens OX=9606 GN=ZNF443 PE=2 SV=2	2	1	1	1	0	0	0	1	0	0	0	1	0	0	0	1	25	25	25	7.6778	64	64;671	1	-2	NaN	NaN	NaN	0	0	Median	NaN	NaN	NaN	NaN	NaN	NaN	NaN	NaN
EXOG	Nuclease EXOG, mitochondrial	NaN	NaN	0.68196	NaN	F8WE28;F8WE38;H7C0W6;Q9Y2C4	F8WE28;F8WE38;H7C0W6;Q9Y2C4	1;1;1;1	1;1;1;1	1;1;1;1	tr|F8WE28|F8WE28_HUMAN Isoform of Q9Y2C4, Nuclease EXOG, mitochondrial OS=Homo sapiens OX=9606 GN=EXOG PE=1 SV=1;tr|F8WE38|F8WE38_HUMAN Isoform of Q9Y2C4, Nuclease EXOG, mitochondrial OS=Homo sapiens OX=9606 GN=EXOG PE=1 SV=1;tr|H7C0W6|H7C0W6_HUMAN Isoform	4	1	1	1	0	0	1	0	0	0	1	0	0	0	1	0	15	15	15	11.4	107	107;143;187;368	0.0086145	1.5079	0.42661	0.68196	NaN	1	0	Median	NaN	NaN	0.42661	NaN	NaN	NaN	0.68196	NaN
CCNK	Cyclin-K	NaN	NaN	0.94922	NaN	G3V5E1;O75909-1;O75909;O75909-4;G3V235;G3V2Q3;O75909-2	G3V5E1;O75909-1;O75909;O75909-4;G3V235;G3V2Q3;O75909-2	2;2;2;2;1;1;1	2;2;2;2;1;1;1	2;2;2;2;1;1;1	tr|G3V5E1|G3V5E1_HUMAN Isoform of O75909, Cyclin-K OS=Homo sapiens OX=9606 GN=CCNK PE=1 SV=1;sp|O75909-1|CCNK-1_HUMAN Isoform of O75909, Isoform 3 of Cyclin-K OS=Homo sapiens OX=9606 GN=CCNK PE=1 SV=2;sp|O75909|CCNK_HUMAN Cyclin-K OS=Homo sapiens OX=9606 G	7	2	2	2	0	0	2	0	0	0	2	0	0	0	2	0	9.3	9.3	9.3	43.404	378	378;357;580;600;109;227;354	0	3.5587	0.61364	0.94922	NaN	1	1	Median	NaN	NaN	0.61364	NaN	NaN	NaN	0.94922	NaN
RABL6	Rab-like protein 6	NaN	NaN	0.43632	NaN	H0Y4Z8;Q3YEC7;Q3YEC7-2;G3V154;F2Z2T0;Q3YEC7-3	H0Y4Z8;Q3YEC7;Q3YEC7-2;G3V154;F2Z2T0;Q3YEC7-3	2;2;2;1;1;1	2;2;2;1;1;1	2;2;2;1;1;1	tr|H0Y4Z8|H0Y4Z8_HUMAN Isoform of Q3YEC7, Chromosome 9 open reading frame 86, isoform CRA_b OS=Homo sapiens OX=9606 GN=RABL6 PE=1 SV=2;sp|Q3YEC7|RABL6_HUMAN Rab-like protein 6 OS=Homo sapiens OX=9606 GN=RABL6 PE=1 SV=2;sp|Q3YEC7-2|RABL6-2_HUMAN Isoform of	6	2	2	2	0	0	2	0	0	0	2	0	0	0	2	0	4	4	4	79.635	730	730;729;730;471;484;520	0	7.4301	0.31966	0.43632	22.011	2	1	Median	NaN	NaN	0.31966	NaN	NaN	NaN	0.43632	NaN
SUCLG2	Succinyl-CoA ligase [GDP-forming] subunit beta, mitochondrial	NaN	NaN	1.2073	NaN	H0Y852;Q96I99	H0Y852;Q96I99	1;1	1;1	1;1	tr|H0Y852|H0Y852_HUMAN Isoform of Q96I99, Succinate--CoA ligase [GDP-forming] subunit beta, mitochondrial (Fragment) OS=Homo sapiens OX=9606 GN=SUCLG2 PE=1 SV=1;sp|Q96I99|SUCB2_HUMAN Succinate--CoA ligase [GDP-forming] subunit beta, mitochondrial OS=Homo s	2	1	1	1	0	0	1	0	0	0	1	0	0	0	1	0	10.5	10.5	10.5	20.138	190	190;432	0.00043197	3.0333	1.0195	1.2073	NaN	1	0	Median	NaN	NaN	1.0195	NaN	NaN	NaN	1.2073	NaN
RSF1	Remodeling and spacing factor 1	NaN	NaN	NaN	NaN	H0YCN2;Q96T23-3;Q96T23-2;Q96T23;H0YER1	H0YCN2;Q96T23-3;Q96T23-2;Q96T23;H0YER1	2;2;2;2;1	2;2;2;2;1	2;2;2;2;1	tr|H0YCN2|H0YCN2_HUMAN Isoform of Q96T23, Remodeling and spacing factor 1 (Fragment) OS=Homo sapiens OX=9606 GN=RSF1 PE=1 SV=1;sp|Q96T23-3|RSF1-3_HUMAN Isoform of Q96T23, Isoform 3 of Remodeling and spacing factor 1 OS=Homo sapiens OX=9606 GN=RSF1 PE=1 SV=	5	2	2	2	2	0	0	0	2	0	0	0	2	0	0	0	4.5	4.5	4.5	90.738	803	803;1189;1410;1441;702	0	11.39	NaN	NaN	NaN	0	0	Median	NaN	NaN	NaN	NaN	NaN	NaN	NaN	NaN
EHBP1L1	EH domain-binding protein 1-like protein 1	NaN	NaN	0.57882	NaN	H0YDZ9;Q8N3D4	H0YDZ9;Q8N3D4	1;1	1;1	1;1	tr|H0YDZ9|H0YDZ9_HUMAN Isoform of Q8N3D4, EH domain-binding protein 1-like protein 1 (Fragment) OS=Homo sapiens OX=9606 GN=EHBP1L1 PE=1 SV=1;sp|Q8N3D4|EH1L1_HUMAN EH domain-binding protein 1-like protein 1 OS=Homo sapiens OX=9606 GN=EHBP1L1 PE=1 SV=2	2	1	1	1	0	0	1	0	0	0	1	0	0	0	1	0	10.6	10.6	10.6	27.592	265	265;1523	0.0082883	1.5433	0.41787	0.57882	NaN	1	1	Median	NaN	NaN	0.41787	NaN	NaN	NaN	0.57882	NaN
SARNP	SAP domain-containing ribonucleoprotein	NaN	NaN	NaN	NaN	H0YHG0;P82979	H0YHG0;P82979	1;1	1;1	1;1	tr|H0YHG0|H0YHG0_HUMAN Uncharacterized protein (Fragment) OS=Homo sapiens OX=9606 PE=1 SV=1;sp|P82979|SARNP_HUMAN SAP domain-containing ribonucleoprotein OS=Homo sapiens OX=9606 GN=SARNP PE=1 SV=3	2	1	1	1	0	0	1	0	0	0	1	0	0	0	1	0	3.6	3.6	3.6	59.075	523	523;210	0	88.801	NaN	NaN	NaN	0	0	Median	NaN	NaN	NaN	NaN	NaN	NaN	NaN	NaN
ABCD4		NaN	NaN	NaN	NaN	H0YJ82	H0YJ82	1	1	1	tr|H0YJ82|H0YJ82_HUMAN Isoform of O14678, ATP-binding cassette sub-family D member 4 (Fragment) OS=Homo sapiens OX=9606 GN=ABCD4 PE=1 SV=1	1	1	1	1	0	0	1	0	0	0	1	0	0	0	1	0	10.8	10.8	10.8	17.903	158	158	0.0073368	1.6336	NaN	NaN	NaN	0	0	Median	NaN	NaN	NaN	NaN	NaN	NaN	NaN	NaN
ZFAND6		NaN	NaN	1.4796	NaN	H0YMR5;H0YLR2	H0YMR5;H0YLR2	1;1	1;1	1;1	tr|H0YMR5|H0YMR5_HUMAN Isoform of Q6FIF0, AN1-type zinc finger protein 6 (Fragment) OS=Homo sapiens OX=9606 GN=ZFAND6 PE=1 SV=1;tr|H0YLR2|H0YLR2_HUMAN Isoform of Q6FIF0, AN1-type zinc finger protein 6 (Fragment) OS=Homo sapiens OX=9606 GN=ZFAND6 PE=1 SV=1	2	1	1	1	0	0	1	0	0	0	1	0	0	0	1	0	5.2	5.2	5.2	16.393	155	155;158	1	-2	1.0865	1.4796	NaN	1	0	Median	NaN	NaN	1.0865	NaN	NaN	NaN	1.4796	NaN
HSDL1	Inactive hydroxysteroid dehydrogenase-like protein 1	NaN	NaN	0.70946	NaN	H3BNH5;H3BQI7;H3BT52;Q3SXM5-2;Q3SXM5	H3BNH5;H3BQI7;H3BT52;Q3SXM5-2;Q3SXM5	1;1;1;1;1	1;1;1;1;1	1;1;1;1;1	tr|H3BNH5|H3BNH5_HUMAN Isoform of Q3SXM5, Inactive hydroxysteroid dehydrogenase-like protein 1 (Fragment) OS=Homo sapiens OX=9606 GN=HSDL1 PE=1 SV=1;tr|H3BQI7|H3BQI7_HUMAN Isoform of Q3SXM5, Inactive hydroxysteroid dehydrogenase-like protein 1 (Fragment) O	5	1	1	1	0	0	1	0	0	0	1	0	0	0	1	0	15.7	15.7	15.7	8.1425	70	70;108;111;275;330	0.00081599	2.4474	0.6088	0.70946	NaN	1	0	Median	NaN	NaN	0.6088	NaN	NaN	NaN	0.70946	NaN
XPO6	Exportin-6	NaN	NaN	0.91087	NaN	H3BPG8;Q96QU8-2;Q96QU8	H3BPG8;Q96QU8-2;Q96QU8	1;1;1	1;1;1	1;1;1	tr|H3BPG8|H3BPG8_HUMAN Isoform of Q96QU8, Exportin-6 (Fragment) OS=Homo sapiens OX=9606 GN=XPO6 PE=1 SV=1;sp|Q96QU8-2|XPO6-2_HUMAN Isoform of Q96QU8, Isoform 2 of Exportin-6 OS=Homo sapiens OX=9606 GN=XPO6 PE=1 SV=1;sp|Q96QU8|XPO6_HUMAN Exportin-6 OS=Homo	3	1	1	1	0	0	1	0	0	0	1	0	0	0	1	0	6.8	6.8	6.8	18.151	161	161;1111;1125	0.0019849	2.2355	0.63471	0.91087	NaN	1	0	Median	NaN	NaN	0.63471	NaN	NaN	NaN	0.91087	NaN
ESD	S-formylglutathione hydrolase	NaN	NaN	1.7661	NaN	H7BZT7;X6RA14;P10768;U3KQT1	H7BZT7;X6RA14;P10768;U3KQT1	2;2;2;1	2;2;2;1	2;2;2;1	tr|H7BZT7|H7BZT7_HUMAN Isoform of P10768, S-formylglutathione hydrolase (Fragment) OS=Homo sapiens OX=9606 GN=ESD PE=1 SV=1;tr|X6RA14|X6RA14_HUMAN Isoform of P10768, S-formylglutathione hydrolase OS=Homo sapiens OX=9606 GN=ESD PE=1 SV=1;sp|P10768|ESTD_HUMA	4	2	2	2	0	0	2	0	0	0	2	0	0	0	2	0	17.4	17.4	17.4	25.368	230	230;253;282;120	0.0008244	2.522	1.1708	1.7661	NaN	1	1	Median	NaN	NaN	1.1708	NaN	NaN	NaN	1.7661	NaN
RSRC1	Serine/Arginine-related protein 53	NaN	NaN	0.72781	NaN	H7C5Q0;Q96IZ7-2;Q96IZ7	H7C5Q0;Q96IZ7-2;Q96IZ7	1;1;1	1;1;1	1;1;1	tr|H7C5Q0|H7C5Q0_HUMAN Isoform of Q96IZ7, Serine/Arginine-related protein 53 (Fragment) OS=Homo sapiens OX=9606 GN=RSRC1 PE=1 SV=1;sp|Q96IZ7-2|RSRC1-2_HUMAN Isoform of Q96IZ7, Isoform 2 of Serine/Arginine-related protein 53 OS=Homo sapiens OX=9606 GN=RSRC1	3	1	1	1	0	1	1	0	0	1	1	0	0	1	1	0	5.8	5.8	5.8	23.415	208	208;276;334	0.002331	2.07	0.47443	0.72781	NaN	1	0	Median	NaN	NaN	0.47443	NaN	NaN	NaN	0.72781	NaN
MED31	Mediator of RNA polymerase II transcription subunit 31	NaN	NaN	NaN	NaN	I3L2J1;Q9Y3C7	I3L2J1;Q9Y3C7	1;1	1;1	1;1	tr|I3L2J1|I3L2J1_HUMAN Isoform of Q9Y3C7, Mediator of RNA polymerase II transcription subunit 31 OS=Homo sapiens OX=9606 GN=MED31 PE=1 SV=1;sp|Q9Y3C7|MED31_HUMAN Mediator of RNA polymerase II transcription subunit 31 OS=Homo sapiens OX=9606 GN=MED31 PE=1 S	2	1	1	1	1	0	0	0	1	0	0	0	1	0	0	0	29.8	29.8	29.8	6.9859	57	57;131	0.0019693	2.1881	NaN	NaN	NaN	0	0	Median	NaN	NaN	NaN	NaN	NaN	NaN	NaN	NaN
BRD7	Bromodomain-containing protein 7	NaN	NaN	NaN	NaN	I3L4V5;Q9NPI1;Q9NPI1-2	I3L4V5;Q9NPI1;Q9NPI1-2	1;1;1	1;1;1	1;1;1	tr|I3L4V5|I3L4V5_HUMAN Isoform of Q9NPI1, Bromodomain-containing protein 7 (Fragment) OS=Homo sapiens OX=9606 GN=BRD7 PE=1 SV=1;sp|Q9NPI1|BRD7_HUMAN Bromodomain-containing protein 7 OS=Homo sapiens OX=9606 GN=BRD7 PE=1 SV=1;sp|Q9NPI1-2|BRD7-2_HUMAN Isoform	3	1	1	1	1	0	0	0	1	0	0	0	1	0	0	0	16.5	16.5	16.5	12.097	109	109;651;652	0	6.0867	NaN	NaN	NaN	0	0	Median	NaN	NaN	NaN	NaN	NaN	NaN	NaN	NaN
INTS2	Integrator complex subunit 2	NaN	NaN	NaN	NaN	J3KMZ7;Q9H0H0	J3KMZ7;Q9H0H0	1;1	1;1	1;1	tr|J3KMZ7|J3KMZ7_HUMAN Isoform of Q9H0H0, Integrator complex subunit 2 OS=Homo sapiens OX=9606 GN=INTS2 PE=1 SV=1;sp|Q9H0H0|INT2_HUMAN Integrator complex subunit 2 OS=Homo sapiens OX=9606 GN=INTS2 PE=1 SV=2	2	1	1	1	1	0	0	0	1	0	0	0	1	0	0	0	2.2	2.2	2.2	133.38	1196	1196;1204	0.0004344	3.0998	NaN	NaN	NaN	0	0	Median	NaN	NaN	NaN	NaN	NaN	NaN	NaN	NaN
PHKG2	Phosphorylase b kinase gamma catalytic chain, liver/testis isoform	NaN	NaN	1.0625	NaN	J3KNN3;P15735-2;P15735;H3BTI9;H3BP07;H3BTW6	J3KNN3;P15735-2;P15735;H3BTI9;H3BP07;H3BTW6	2;2;2;1;1;1	2;2;2;1;1;1	2;2;2;1;1;1	tr|J3KNN3|J3KNN3_HUMAN Isoform of P15735, Phosphorylase b kinase gamma catalytic chain, liver/testis isoform OS=Homo sapiens OX=9606 GN=PHKG2 PE=1 SV=1;sp|P15735-2|PHKG2-2_HUMAN Isoform of P15735, Isoform 2 of Phosphorylase b kinase gamma catalytic chain,	6	2	2	2	0	0	2	0	0	0	2	0	0	0	2	0	7.6	7.6	7.6	46.886	410	410;374;406;80;254;266	0.0041494	1.8766	0.75491	1.0625	15.669	2	0	Median	NaN	NaN	0.75491	NaN	NaN	NaN	1.0625	NaN
GPR142	Probable G-protein coupled receptor 142	NaN	NaN	NaN	NaN	J3QSD0;J3QLF2;Q7Z601	J3QSD0;J3QLF2;Q7Z601	1;1;1	1;1;1	1;1;1	tr|J3QSD0|J3QSD0_HUMAN Isoform of Q7Z601, Probable G-protein-coupled receptor 142 OS=Homo sapiens OX=9606 GN=GPR142 PE=4 SV=1;tr|J3QLF2|J3QLF2_HUMAN Isoform of Q7Z601, Probable G-protein-coupled receptor 142 OS=Homo sapiens OX=9606 GN=GPR142 PE=4 SV=1;sp|Q	3	1	1	1	0	0	1	0	0	0	1	0	0	0	1	0	9.9	9.9	9.9	11.264	101	101;131;462	1	-2	NaN	NaN	NaN	0	0	Median	NaN	NaN	NaN	NaN	NaN	NaN	NaN	NaN
SLC9A3R1	Na(+)/H(+) exchange regulatory cofactor NHE-RF1	NaN	NaN	1.272	NaN	J3QRP6;O14745	J3QRP6;O14745	2;2	2;2	2;2	tr|J3QRP6|J3QRP6_HUMAN Isoform of O14745, Na(+)/H(+) exchange regulatory cofactor NHE-RF1 (Fragment) OS=Homo sapiens OX=9606 GN=SLC9A3R1 PE=1 SV=1;sp|O14745|NHRF1_HUMAN Na(+)/H(+) exchange regulatory cofactor NHE-RF1 OS=Homo sapiens OX=9606 GN=SLC9A3R1 PE=	2	2	2	2	0	0	2	0	0	0	2	0	0	0	2	0	18.6	18.6	18.6	22.871	215	215;358	0	4.4976	0.95103	1.272	11.509	2	1	Median	NaN	NaN	0.95103	NaN	NaN	NaN	1.272	NaN
H3F3B;H3F3C;HIST2H3A;HIST3H3;H3F3A;HIST1H3A	Histone H3;Histone H3.3C;Histone H3.2;Histone H3.1t;Histone H3.3;Histone H3.1	NaN	NaN	1.0861	NaN	K7EK07;Q6NXT2;Q71DI3;Q16695;P84243;P68431	K7EK07;Q6NXT2;Q71DI3;Q16695;P84243;P68431	2;2;2;2;2;2	2;2;2;2;2;2	1;1;1;1;1;1	tr|K7EK07|K7EK07_HUMAN Isoform of P84243, Histone H3 (Fragment) OS=Homo sapiens OX=9606 GN=H3F3B PE=1 SV=1;sp|Q6NXT2|H3C_HUMAN Histone H3.3C OS=Homo sapiens OX=9606 GN=H3F3C PE=1 SV=3;sp|Q71DI3|H32_HUMAN Histone H3.2 OS=Homo sapiens OX=9606 GN=HIST2H3D PE=	6	2	2	1	0	1	2	0	0	1	2	0	0	0	1	0	14.4	14.4	9.1	14.914	132	132;135;136;136;136;136	0.0098835	1.4339	0.60983	1.0861	NaN	1	0	Median	NaN	NaN	0.60983	NaN	NaN	NaN	1.0861	NaN
PIN1;PIN1P1	Peptidyl-prolyl cis-trans isomerase NIMA-interacting 1;Putative PIN1-like protein	NaN	NaN	NaN	NaN	K7EMU7;Q13526;K7EN45;O15428	K7EMU7;Q13526;K7EN45;O15428	2;2;1;1	2;2;1;1	2;2;1;1	tr|K7EMU7|K7EMU7_HUMAN Isoform of Q13526, Peptidyl-prolyl cis-trans isomerase OS=Homo sapiens OX=9606 GN=PIN1 PE=1 SV=1;sp|Q13526|PIN1_HUMAN Peptidyl-prolyl cis-trans isomerase NIMA-interacting 1 OS=Homo sapiens OX=9606 GN=PIN1 PE=1 SV=1;tr|K7EN45|K7EN45_H	4	2	2	2	1	1	2	1	1	1	2	1	1	1	2	1	22.8	22.8	22.8	16.132	145	145;163;90;100	0.0019976	2.2982	NaN	NaN	NaN	0	0	Median	NaN	NaN	NaN	NaN	NaN	NaN	NaN	NaN
TK1	Thymidine kinase	NaN	NaN	0.90632	NaN	K7ERV3;K7ES52;K7ERJ1;K7ENW5	K7ERV3;K7ES52;K7ERJ1	9;5;5;2	1;0;0;0	1;0;0;0	tr|K7ERV3|K7ERV3_HUMAN Isoform of P04183, Thymidine kinase OS=Homo sapiens OX=9606 GN=TK1 PE=1 SV=1;tr|K7ES52|K7ES52_HUMAN Isoform of P04183, Thymidine kinase OS=Homo sapiens OX=9606 GN=TK1 PE=1 SV=1;tr|K7ERJ1|K7ERJ1_HUMAN Isoform of P04183, Thymidine kina	4	9	1	1	7	7	6	6	0	0	1	0	0	0	1	0	41.6	6	6	28.594	267	267;180;187;87	1	-2	0.65431	0.90632	NaN	1	0	Median	NaN	NaN	0.65431	NaN	NaN	NaN	0.90632	NaN
STXBP2	Syntaxin-binding protein 2	NaN	NaN	0.72814	NaN	M0R376;M0R1A1;M0R0M7;Q15833-2;Q15833;Q15833-3	M0R376;M0R1A1;M0R0M7;Q15833-2;Q15833;Q15833-3	1;1;1;1;1;1	1;1;1;1;1;1	1;1;1;1;1;1	tr|M0R376|M0R376_HUMAN Isoform of Q15833, Syntaxin-binding protein 2 (Fragment) OS=Homo sapiens OX=9606 GN=STXBP2 PE=1 SV=1;tr|M0R1A1|M0R1A1_HUMAN Isoform of Q15833, Syntaxin-binding protein 2 (Fragment) OS=Homo sapiens OX=9606 GN=STXBP2 PE=1 SV=1;tr|M0R0M	6	1	1	1	0	0	1	0	0	0	1	0	0	0	1	0	10.7	10.7	10.7	15.868	149	149;220;408;590;593;604	0.00081235	2.4159	0.57935	0.72814	NaN	1	0	Median	NaN	NaN	0.57935	NaN	NaN	NaN	0.72814	NaN
DFFA	DNA fragmentation factor subunit alpha	NaN	NaN	1.3601	NaN	O00273-2;O00273	O00273-2;O00273	1;1	1;1	1;1	sp|O00273-2|DFFA-2_HUMAN Isoform of O00273, Isoform DFF35 of DNA fragmentation factor subunit alpha OS=Homo sapiens OX=9606 GN=DFFA PE=1 SV=1;sp|O00273|DFFA_HUMAN DNA fragmentation factor subunit alpha OS=Homo sapiens OX=9606 GN=DFFA PE=1 SV=1	2	1	1	1	0	0	1	0	0	0	1	0	0	0	1	0	6.3	6.3	6.3	29.41	268	268;331	0.00082919	2.5614	1.0748	1.3601	NaN	1	0	Median	NaN	NaN	1.0748	NaN	NaN	NaN	1.3601	NaN
ARHGEF10	Rho guanine nucleotide exchange factor 10	NaN	NaN	0.6103	NaN	O15013-7;O15013-4;O15013-5;O15013-6;O15013;H0YAN8;E9PB39	O15013-7;O15013-4;O15013-5;O15013-6;O15013;H0YAN8;E9PB39	4;4;4;4;4;3;2	4;4;4;4;4;3;2	4;4;4;4;4;3;2	sp|O15013-7|ARHGA-7_HUMAN Isoform of O15013, Isoform 3 of Rho guanine nucleotide exchange factor 10 OS=Homo sapiens OX=9606 GN=ARHGEF10 PE=1 SV=4;sp|O15013-4|ARHGA-4_HUMAN Isoform of O15013, Isoform 4 of Rho guanine nucleotide exchange factor 10 OS=Homo sa	7	4	4	4	2	0	2	0	2	0	2	0	2	0	2	0	5.9	5.9	5.9	144.27	1306	1306;1340;1344;1368;1369;988;380	0	84.589	0.40977	0.6103	13.836	2	0	Median	NaN	NaN	0.40977	NaN	NaN	NaN	0.6103	NaN
ACOX3	Peroxisomal acyl-coenzyme A oxidase 3	NaN	NaN	NaN	NaN	O15254-2;O15254	O15254-2;O15254	1;1	1;1	1;1	sp|O15254-2|ACOX3-2_HUMAN Isoform of O15254, Isoform 2 of Peroxisomal acyl-coenzyme A oxidase 3 OS=Homo sapiens OX=9606 GN=ACOX3 PE=1 SV=2;sp|O15254|ACOX3_HUMAN Peroxisomal acyl-coenzyme A oxidase 3 OS=Homo sapiens OX=9606 GN=ACOX3 PE=1 SV=2	2	1	1	1	0	0	1	0	0	0	1	0	0	0	1	0	2.7	2.7	2.7	69.574	624	624;700	0.0072886	1.6032	NaN	NaN	NaN	0	0	Median	NaN	NaN	NaN	NaN	NaN	NaN	NaN	NaN
MSI1	RNA-binding protein Musashi homolog 1	NaN	NaN	NaN	NaN	O43347	O43347	1	1	1	sp|O43347|MSI1H_HUMAN RNA-binding protein Musashi homolog 1 OS=Homo sapiens OX=9606 GN=MSI1 PE=1 SV=1	1	1	1	1	0	0	1	1	0	0	1	1	0	0	1	1	4.7	4.7	4.7	39.124	362	362	0.0023539	2.1501	NaN	NaN	NaN	0	0	Median	NaN	NaN	NaN	NaN	NaN	NaN	NaN	NaN
SYNCRIP	Heterogeneous nuclear ribonucleoprotein Q	NaN	NaN	NaN	NaN	O60506-4;O60506-3;B7Z645;O60506-5;H0YAA0	O60506-4;O60506-3;B7Z645;O60506-5	25;25;21;17;1	1;1;1;1;1	1;1;1;1;1	sp|O60506-4|HNRPQ-4_HUMAN Isoform of O60506, Isoform 4 of Heterogeneous nuclear ribonucleoprotein Q OS=Homo sapiens OX=9606 GN=SYNCRIP PE=1 SV=2;sp|O60506-3|HNRPQ-3_HUMAN Isoform of O60506, Isoform 3 of Heterogeneous nuclear ribonucleoprotein Q OS=Homo sap	5	25	1	1	19	17	20	21	1	1	0	1	1	1	0	1	49.7	1.9	1.9	58.735	527	527;562;464;410;97	0	9.8187	NaN	NaN	NaN	0	0	Median	NaN	NaN	NaN	NaN	NaN	NaN	NaN	NaN
SMNDC1	Survival of motor neuron-related-splicing factor 30	NaN	NaN	0.9315	NaN	O75940	O75940	2	2	2	sp|O75940|SPF30_HUMAN Survival of motor neuron-related-splicing factor 30 OS=Homo sapiens OX=9606 GN=SMNDC1 PE=1 SV=1	1	2	2	2	0	0	2	0	0	0	2	0	0	0	2	0	17.6	17.6	17.6	26.711	238	238	0.0023274	2.0523	0.57898	0.9315	NaN	1	0	Median	NaN	NaN	0.57898	NaN	NaN	NaN	0.9315	NaN
CIAO1	Probable cytosolic iron-sulfur protein assembly protein CIAO1	NaN	NaN	1.4378	NaN	O76071	O76071	1	1	1	sp|O76071|CIAO1_HUMAN Probable cytosolic iron-sulfur protein assembly protein CIAO1 OS=Homo sapiens OX=9606 GN=CIAO1 PE=1 SV=1	1	1	1	1	0	0	1	0	0	0	1	0	0	0	1	0	4.7	4.7	4.7	37.84	339	339	0.0023265	2.0505	0.89983	1.4378	NaN	1	0	Median	NaN	NaN	0.89983	NaN	NaN	NaN	1.4378	NaN
TOX4;TOX;TOX3	TOX high mobility group box family member 4;Thymocyte selection-associated high mobility group box protein TOX;TOX high mobility group box family member 3	NaN	NaN	0.43401	NaN	O94842-3;O94842-2;O94842;O94900;O15405-2;O15405	O94842-3;O94842-2;O94842;O94900;O15405-2;O15405	2;2;2;1;1;1	2;2;2;1;1;1	2;2;2;1;1;1	sp|O94842-3|TOX4-3_HUMAN Isoform of O94842, Isoform 3 of TOX high mobility group box family member 4 OS=Homo sapiens OX=9606 GN=TOX4 PE=1 SV=1;sp|O94842-2|TOX4-2_HUMAN Isoform of O94842, Isoform 2 of TOX high mobility group box family member 4 OS=Homo sapi	6	2	2	2	0	0	2	0	0	0	2	0	0	0	2	0	4.4	4.4	4.4	63.594	595	595;598;621;526;571;576	0.0023383	2.0867	0.27874	0.43401	74.284	2	2	Median	NaN	NaN	0.27874	NaN	NaN	NaN	0.43401	NaN
GLS	Glutaminase kidney isoform, mitochondrial	NaN	NaN	1.274	NaN	O94925-3;O94925;H7BZD1;O94925-2	O94925-3;O94925;H7BZD1	3;3;2;1	3;3;2;1	3;3;2;1	sp|O94925-3|GLSK-3_HUMAN Isoform of O94925, Isoform 3 of Glutaminase kidney isoform, mitochondrial OS=Homo sapiens OX=9606 GN=GLS PE=1 SV=1;sp|O94925|GLSK_HUMAN Glutaminase kidney isoform, mitochondrial OS=Homo sapiens OX=9606 GN=GLS PE=1 SV=1;tr|H7BZD1|H7	4	3	3	3	0	0	3	0	0	0	3	0	0	0	3	0	7.7	7.7	7.7	65.459	598	598;669;114;169	0	5.3666	0.93332	1.274	7.1193	3	0	Leave out requantified	NaN	NaN	0.93332	NaN	NaN	NaN	1.274	NaN
TDP2	Tyrosyl-DNA phosphodiesterase 2	NaN	NaN	NaN	NaN	O95551;O95551-2	O95551;O95551-2	1;1	1;1	1;1	sp|O95551|TYDP2_HUMAN Tyrosyl-DNA phosphodiesterase 2 OS=Homo sapiens OX=9606 GN=TDP2 PE=1 SV=1;sp|O95551-2|TYDP2-2_HUMAN Isoform of O95551, Isoform 2 of Tyrosyl-DNA phosphodiesterase 2 OS=Homo sapiens OX=9606 GN=TDP2 PE=1 SV=1	2	1	1	1	0	1	0	0	0	1	0	0	0	1	0	0	4.7	4.7	4.7	40.929	362	362;392	0	16.043	NaN	NaN	NaN	0	0	Median	NaN	NaN	NaN	NaN	NaN	NaN	NaN	NaN
IGKC	Ig kappa chain C region	NaN	NaN	NaN	NaN	P01834	P01834	2	2	2	sp|P01834|IGKC_HUMAN Immunoglobulin kappa constant OS=Homo sapiens OX=9606 GN=IGKC PE=1 SV=2	1	2	2	2	0	1	1	0	0	1	1	0	0	1	1	0	35.5	35.5	35.5	11.765	107	107	0	13.052	NaN	NaN	NaN	0	0	Median	NaN	NaN	NaN	NaN	NaN	NaN	NaN	NaN
TYMS	Thymidylate synthase	NaN	NaN	NaN	NaN	P04818	P04818	1	1	1	sp|P04818|TYSY_HUMAN Thymidylate synthase OS=Homo sapiens OX=9606 GN=TYMS PE=1 SV=3	1	1	1	1	1	0	0	0	1	0	0	0	1	0	0	0	5.1	5.1	5.1	35.716	313	313	0.0023419	2.1086	NaN	NaN	NaN	0	0	Median	NaN	NaN	NaN	NaN	NaN	NaN	NaN	NaN
UQCRH	Cytochrome b-c1 complex subunit 6, mitochondrial	NaN	NaN	NaN	NaN	P07919	P07919	1	1	1	sp|P07919|QCR6_HUMAN Cytochrome b-c1 complex subunit 6, mitochondrial OS=Homo sapiens OX=9606 GN=UQCRH PE=1 SV=2	1	1	1	1	0	0	0	1	0	0	0	1	0	0	0	1	19.8	19.8	19.8	10.739	91	91	0	4.4675	NaN	NaN	NaN	0	0	Median	NaN	NaN	NaN	NaN	NaN	NaN	NaN	NaN
UMPS	Uridine 5-monophosphate synthase;Orotate phosphoribosyltransferase;Orotidine 5-phosphate decarboxylase	NaN	NaN	1.0427	NaN	P11172;F2Z3P2;F2Z303;F8WDG4;E9PFD2;P11172-2;P11172-3	P11172;F2Z3P2;F2Z303;F8WDG4;E9PFD2;P11172-2;P11172-3	2;1;1;1;1;1;1	2;1;1;1;1;1;1	2;1;1;1;1;1;1	sp|P11172|UMPS_HUMAN Uridine 5-monophosphate synthase OS=Homo sapiens OX=9606 GN=UMPS PE=1 SV=1;tr|F2Z3P2|F2Z3P2_HUMAN Isoform of P11172, Uridine 5-monophosphate synthase OS=Homo sapiens OX=9606 GN=UMPS PE=1 SV=1;tr|F2Z303|F2Z303_HUMAN Isoform of P11172,	7	2	2	2	0	0	2	0	0	0	2	0	0	0	2	0	7.7	7.7	7.7	52.221	480	480;57;66;142;342;302;388	0.00084282	2.7397	0.81371	1.0427	20.173	2	0	Median	NaN	NaN	0.81371	NaN	NaN	NaN	1.0427	NaN
NQO2	Ribosyldihydronicotinamide dehydrogenase [quinone]	NaN	NaN	0.84718	NaN	Q5TD07;P16083	Q5TD07;P16083	1;1	1;1	1;1	tr|Q5TD07|Q5TD07_HUMAN Isoform of P16083, Ribosyldihydronicotinamide dehydrogenase [quinone] OS=Homo sapiens OX=9606 GN=NQO2 PE=1 SV=1;sp|P16083|NQO2_HUMAN Ribosyldihydronicotinamide dehydrogenase [quinone] OS=Homo sapiens OX=9606 GN=NQO2 PE=1 SV=5	2	1	1	1	0	0	1	0	0	0	1	0	0	0	1	0	9.3	9.3	9.3	21.537	193	193;231	0.0023355	2.0821	0.61987	0.84718	NaN	1	0	Median	NaN	NaN	0.61987	NaN	NaN	NaN	0.84718	NaN
S100A7;S100A7A	Protein S100-A7;Protein S100-A7A	NaN	NaN	NaN	NaN	P31151;Q86SG5	P31151;Q86SG5	3;2	3;2	3;2	sp|P31151|S10A7_HUMAN Protein S100-A7 OS=Homo sapiens OX=9606 GN=S100A7 PE=1 SV=4;sp|Q86SG5|S1A7A_HUMAN Protein S100-A7A OS=Homo sapiens OX=9606 GN=S100A7A PE=1 SV=3	2	3	3	3	0	2	0	3	0	2	0	3	0	2	0	3	34.7	34.7	34.7	11.471	101	101;101	0	3.4	NaN	NaN	NaN	0	0	Median	NaN	NaN	NaN	NaN	NaN	NaN	NaN	NaN
MAP2K4	Dual specificity mitogen-activated protein kinase kinase 4	NaN	NaN	NaN	NaN	R4GN37;P45985	R4GN37;P45985	1;1	1;1	1;1	tr|R4GN37|R4GN37_HUMAN Isoform of P45985, Dual-specificity mitogen-activated protein kinase kinase 4 OS=Homo sapiens OX=9606 GN=MAP2K4 PE=1 SV=1;sp|P45985|MP2K4_HUMAN Dual specificity mitogen-activated protein kinase kinase 4 OS=Homo sapiens OX=9606 GN=MAP	2	1	1	1	1	0	0	0	1	0	0	0	1	0	0	0	42.4	42.4	42.4	9.5588	92	92;399	0.00044307	3.3513	NaN	NaN	NaN	0	0	Median	NaN	NaN	NaN	NaN	NaN	NaN	NaN	NaN
RECQL	ATP-dependent DNA helicase Q1	NaN	NaN	1.1003	NaN	P46063	P46063	3	3	3	sp|P46063|RECQ1_HUMAN ATP-dependent DNA helicase Q1 OS=Homo sapiens OX=9606 GN=RECQL PE=1 SV=3	1	3	3	3	0	0	3	0	0	0	3	0	0	0	3	0	6.6	6.6	6.6	73.457	649	649	0.00084175	2.7273	0.75678	1.1003	13.571	3	0	Leave out requantified	NaN	NaN	0.75678	NaN	NaN	NaN	1.1003	NaN
PRIM1	DNA primase small subunit;DNA primase	NaN	NaN	NaN	NaN	P49642;F8VSB2;A0A3B3ITS8;F8VNY2	P49642;F8VSB2;A0A3B3ITS8;F8VNY2	2;1;1;1	2;1;1;1	2;1;1;1	sp|P49642|PRI1_HUMAN DNA primase small subunit OS=Homo sapiens OX=9606 GN=PRIM1 PE=1 SV=1;tr|F8VSB2|F8VSB2_HUMAN Isoform of P49642, DNA primase small subunit OS=Homo sapiens OX=9606 GN=PRIM1 PE=1 SV=1;tr|A0A3B3ITS8|A0A3B3ITS8_HUMAN Uncharacterized protein	4	2	2	2	1	0	0	1	1	0	0	1	1	0	0	1	8.6	8.6	8.6	49.901	420	420;185;196;327	0.003443	1.9745	NaN	NaN	NaN	0	0	Median	NaN	NaN	NaN	NaN	NaN	NaN	NaN	NaN
SEPHS1	Selenide, water dikinase 1	NaN	NaN	NaN	NaN	P49903-2;P49903-3;P49903	P49903-2;P49903-3;P49903	1;1;1	1;1;1	1;1;1	sp|P49903-2|SPS1-2_HUMAN Isoform of P49903, Isoform 2 of Selenide, water dikinase 1 OS=Homo sapiens OX=9606 GN=SEPHS1 PE=1 SV=2;sp|P49903-3|SPS1-3_HUMAN Isoform of P49903, Isoform 3 of Selenide, water dikinase 1 OS=Homo sapiens OX=9606 GN=SEPHS1 PE=1 SV=2;	3	1	1	1	1	1	0	0	1	1	0	0	1	1	0	0	6.5	6.5	6.5	35.479	321	321;325;392	0	4.715	NaN	NaN	NaN	0	0	Median	NaN	NaN	NaN	NaN	NaN	NaN	NaN	NaN
RAB5C	Ras-related protein Rab-5C	NaN	NaN	0.93585	NaN	P51148;P51148-2	P51148;P51148-2	1;1	1;1	1;1	sp|P51148|RAB5C_HUMAN Ras-related protein Rab-5C OS=Homo sapiens OX=9606 GN=RAB5C PE=1 SV=2;sp|P51148-2|RAB5C-2_HUMAN Isoform of P51148, Isoform 2 of Ras-related protein Rab-5C OS=Homo sapiens OX=9606 GN=RAB5C PE=1 SV=2	2	1	1	1	0	0	1	0	0	0	1	0	0	0	1	0	6.5	6.5	6.5	23.482	216	216;249	0.00081202	2.4144	0.69231	0.93585	15.227	2	0	Median	NaN	NaN	0.69231	NaN	NaN	NaN	0.93585	NaN
MRPL12	39S ribosomal protein L12, mitochondrial	NaN	NaN	NaN	NaN	P52815	P52815	2	1	1	sp|P52815|RM12_HUMAN 39S ribosomal protein L12, mitochondrial OS=Homo sapiens OX=9606 GN=MRPL12 PE=1 SV=2	1	2	1	1	2	0	2	0	1	0	1	0	1	0	1	0	12.6	6.6	6.6	21.348	198	198	0.0098905	1.435	NaN	NaN	NaN	0	0	Median	NaN	NaN	NaN	NaN	NaN	NaN	NaN	NaN
EIF5	Eukaryotic translation initiation factor 5	NaN	NaN	0.26996	NaN	P55010	P55010	3	3	3	sp|P55010|IF5_HUMAN Eukaryotic translation initiation factor 5 OS=Homo sapiens OX=9606 GN=EIF5 PE=1 SV=2	1	3	3	3	0	0	3	0	0	0	3	0	0	0	3	0	7.9	7.9	7.9	49.222	431	431	0	6.2463	0.19717	0.26996	2.6356	3	0	Leave out requantified	NaN	NaN	0.19717	NaN	NaN	NaN	0.26996	NaN
SEC61B	Protein transport protein Sec61 subunit beta	NaN	NaN	1.4402	NaN	S4R3B5;P60468	S4R3B5;P60468	1;1	1;1	1;1	tr|S4R3B5|S4R3B5_HUMAN Isoform of P60468, Protein transport protein Sec61 subunit beta OS=Homo sapiens OX=9606 GN=SEC61B PE=1 SV=1;sp|P60468|SC61B_HUMAN Protein transport protein Sec61 subunit beta OS=Homo sapiens OX=9606 GN=SEC61B PE=1 SV=2	2	1	1	1	0	0	1	0	0	0	1	0	0	0	1	0	23.8	23.8	23.8	4.8738	42	42;96	0.0082913	1.5436	0.74919	1.4402	NaN	1	0	Median	NaN	NaN	0.74919	NaN	NaN	NaN	1.4402	NaN
RAB8A	Ras-related protein Rab-8A	NaN	NaN	0.62	NaN	P61006	P61006	2	1	1	sp|P61006|RAB8A_HUMAN Ras-related protein Rab-8A OS=Homo sapiens OX=9606 GN=RAB8A PE=1 SV=1	1	2	1	1	1	1	2	1	0	0	1	0	0	0	1	0	12.1	6.8	6.8	23.668	207	207	0.00084246	2.7383	0.52745	0.62	NaN	1	0	Median	NaN	NaN	0.52745	NaN	NaN	NaN	0.62	NaN
LYZ	Lysozyme C;Lysozyme	NaN	NaN	NaN	NaN	P61626;F8VV32;A0A0B4J259	P61626;F8VV32;A0A0B4J259	2;1;1	2;1;1	2;1;1	sp|P61626|LYSC_HUMAN Lysozyme C OS=Homo sapiens OX=9606 GN=LYZ PE=1 SV=1;tr|F8VV32|F8VV32_HUMAN Isoform of P61626, Lysozyme OS=Homo sapiens OX=9606 GN=LYZ PE=1 SV=1;tr|A0A0B4J259|A0A0B4J259_HUMAN Isoform of P61626, Lysozyme OS=Homo sapiens OX=9606 GN=LYZ P	3	2	2	2	0	1	1	0	0	1	1	0	0	1	1	0	27	27	27	16.537	148	148;104;137	0	3.8249	NaN	NaN	NaN	0	0	Median	NaN	NaN	NaN	NaN	NaN	NaN	NaN	NaN
GSTO1	Glutathione S-transferase omega-1	NaN	NaN	1.53	NaN	Q5TA02;P78417-3;P78417;Q5TA01;P78417-2	Q5TA02;P78417-3;P78417;Q5TA01;P78417-2	2;2;2;1;1	2;2;2;1;1	2;2;2;1;1	tr|Q5TA02|Q5TA02_HUMAN Isoform of P78417, Glutathione S-transferase omega-1 (Fragment) OS=Homo sapiens OX=9606 GN=GSTO1 PE=1 SV=1;sp|P78417-3|GSTO1-3_HUMAN Isoform of P78417, Isoform 3 of Glutathione S-transferase omega-1 OS=Homo sapiens OX=9606 GN=GSTO1 P	5	2	2	2	0	0	2	0	0	0	2	0	0	0	2	0	9.5	9.5	9.5	23.341	200	200;213;241;180;208	0.0041556	1.8906	0.83599	1.53	6.3199	2	0	Median	NaN	NaN	0.83599	NaN	NaN	NaN	1.53	NaN
DCD	Dermcidin;Survival-promoting peptide;DCD-1	NaN	NaN	NaN	NaN	P81605;P81605-2	P81605;P81605-2	1;1	1;1	1;1	sp|P81605|DCD_HUMAN Dermcidin OS=Homo sapiens OX=9606 GN=DCD PE=1 SV=2;sp|P81605-2|DCD-2_HUMAN Isoform of P81605, Isoform 2 of Dermcidin OS=Homo sapiens OX=9606 GN=DCD PE=1 SV=2	2	1	1	1	1	0	0	0	1	0	0	0	1	0	0	0	12.7	12.7	12.7	11.284	110	110;121	0.0099185	1.4443	NaN	NaN	NaN	0	0	Median	NaN	NaN	NaN	NaN	NaN	NaN	NaN	NaN
MRPS10	28S ribosomal protein S10, mitochondrial	NaN	NaN	0.82425	NaN	P82664	P82664	1	1	1	sp|P82664|RT10_HUMAN 28S ribosomal protein S10, mitochondrial OS=Homo sapiens OX=9606 GN=MRPS10 PE=1 SV=2	1	1	1	1	0	0	1	0	0	0	1	0	0	0	1	0	9	9	9	22.999	201	201	0.00082713	2.5427	0.65579	0.82425	NaN	1	0	Median	NaN	NaN	0.65579	NaN	NaN	NaN	0.82425	NaN
COG7	Conserved oligomeric Golgi complex subunit 7	NaN	NaN	12.906	NaN	P83436	P83436	1	1	1	sp|P83436|COG7_HUMAN Conserved oligomeric Golgi complex subunit 7 OS=Homo sapiens OX=9606 GN=COG7 PE=1 SV=1	1	1	1	1	0	0	1	0	0	0	1	0	0	0	1	0	2.3	2.3	2.3	86.343	770	770	0.001981	2.2192	9.4775	12.906	NaN	1	1	Median	NaN	NaN	9.4775	NaN	NaN	NaN	12.906	NaN
HMGCS1	Hydroxymethylglutaryl-CoA synthase, cytoplasmic	NaN	NaN	NaN	NaN	Q01581	Q01581	1	1	1	sp|Q01581|HMCS1_HUMAN Hydroxymethylglutaryl-CoA synthase, cytoplasmic OS=Homo sapiens OX=9606 GN=HMGCS1 PE=1 SV=2	1	1	1	1	0	0	1	0	0	0	1	0	0	0	1	0	3.5	3.5	3.5	57.293	520	520	0	21.448	NaN	NaN	NaN	0	0	Median	NaN	NaN	NaN	NaN	NaN	NaN	NaN	NaN
DSG1	Desmoglein-1	NaN	NaN	NaN	NaN	Q02413	Q02413	5	5	5	sp|Q02413|DSG1_HUMAN Desmoglein-1 OS=Homo sapiens OX=9606 GN=DSG1 PE=1 SV=2	1	5	5	5	2	2	3	3	2	2	3	3	2	2	3	3	8.8	8.8	8.8	113.75	1049	1049	0	63.753	NaN	NaN	NaN	0	0	Median	NaN	NaN	NaN	NaN	NaN	NaN	NaN	NaN
CSTF3	Cleavage stimulation factor subunit 3	NaN	NaN	0.92268	NaN	Q12996;E9PJ06;E9PLP8;Q12996-3;Q12996-2;H0YE74	Q12996;E9PJ06;E9PLP8;Q12996-3;Q12996-2	4;2;2;2;2;1	4;2;2;2;2;1	4;2;2;2;2;1	sp|Q12996|CSTF3_HUMAN Cleavage stimulation factor subunit 3 OS=Homo sapiens OX=9606 GN=CSTF3 PE=1 SV=1;tr|E9PJ06|E9PJ06_HUMAN Isoform of Q12996, Cleavage stimulation factor subunit 3 (Fragment) OS=Homo sapiens OX=9606 GN=CSTF3 PE=1 SV=1;tr|E9PLP8|E9PLP8_HU	6	4	4	4	1	0	3	2	1	0	3	2	1	0	3	2	8.6	8.6	8.6	82.921	717	717;61;749;44;103;91	0	32.862	0.6359	0.92268	81.468	2	2	Median	NaN	NaN	0.6359	NaN	NaN	NaN	0.92268	NaN
SPP2	Secreted phosphoprotein 24	NaN	NaN	NaN	NaN	Q13103	Q13103	1	1	1	sp|Q13103|SPP24_HUMAN Secreted phosphoprotein 24 OS=Homo sapiens OX=9606 GN=SPP2 PE=1 SV=1	1	1	1	1	0	1	0	0	0	1	0	0	0	1	0	0	5.7	5.7	5.7	24.337	211	211	1	-2	NaN	NaN	NaN	0	0	Median	NaN	NaN	NaN	NaN	NaN	NaN	NaN	NaN
MAPK7	Mitogen-activated protein kinase 7	NaN	NaN	NaN	NaN	Q13164-2;Q13164	Q13164-2;Q13164	1;1	1;1	1;1	sp|Q13164-2|MK07-2_HUMAN Isoform of Q13164, Isoform 2 of Mitogen-activated protein kinase 7 OS=Homo sapiens OX=9606 GN=MAPK7 PE=1 SV=2;sp|Q13164|MK07_HUMAN Mitogen-activated protein kinase 7 OS=Homo sapiens OX=9606 GN=MAPK7 PE=1 SV=2	2	1	1	1	0	0	1	0	0	0	1	0	0	0	1	0	3.4	3.4	3.4	73.217	677	677;816	0.00081334	2.4223	NaN	NaN	NaN	0	0	Median	NaN	NaN	NaN	NaN	NaN	NaN	NaN	NaN
GOLGA4	Golgin subfamily A member 4	NaN	NaN	NaN	NaN	Q13439-3	Q13439-3	126	1	0	sp|Q13439-3|GOGA4-3_HUMAN Isoform of Q13439, Isoform 3 of Golgin subfamily A member 4 OS=Homo sapiens OX=9606 GN=GOLGA4 PE=1 SV=1	1	126	1	0	91	88	87	84	0	0	0	1	0	0	0	0	56.1	0.8	0	260.32	2223	2223	1	-2	NaN	NaN	NaN	0	0	Median	NaN	NaN	NaN	NaN	NaN	NaN	NaN	NaN
IL18	Interleukin-18	NaN	NaN	1.8243	NaN	Q14116-2;Q14116	Q14116-2;Q14116	2;2	2;2	2;2	sp|Q14116-2|IL18-2_HUMAN Isoform of Q14116, Isoform 2 of Interleukin-18 OS=Homo sapiens OX=9606 GN=IL18 PE=1 SV=1;sp|Q14116|IL18_HUMAN Interleukin-18 OS=Homo sapiens OX=9606 GN=IL18 PE=1 SV=1	2	2	2	2	0	0	2	0	0	0	2	0	0	0	2	0	12.7	12.7	12.7	21.896	189	189;193	0.00043535	3.1405	1.0859	1.8243	NaN	1	0	Median	NaN	NaN	1.0859	NaN	NaN	NaN	1.8243	NaN
NAA30	N-alpha-acetyltransferase 30	NaN	NaN	4.3549	NaN	Q147X3-2;Q147X3	Q147X3-2;Q147X3	1;1	1;1	1;1	sp|Q147X3-2|NAA30-2_HUMAN Isoform of Q147X3, Isoform 2 of N-alpha-acetyltransferase 30 OS=Homo sapiens OX=9606 GN=NAA30 PE=1 SV=1;sp|Q147X3|NAA30_HUMAN N-alpha-acetyltransferase 30 OS=Homo sapiens OX=9606 GN=NAA30 PE=1 SV=1	2	1	1	1	0	0	1	0	0	0	1	0	0	0	1	0	5.8	5.8	5.8	35.579	325	325;362	0.0073099	1.6208	2.9842	4.3549	NaN	1	1	Median	NaN	NaN	2.9842	NaN	NaN	NaN	4.3549	NaN
ACOX1	Peroxisomal acyl-coenzyme A oxidase 1	NaN	NaN	0.92015	NaN	Q15067-3;Q15067-2;Q15067	Q15067-3;Q15067-2;Q15067	1;1;1	1;1;1	1;1;1	sp|Q15067-3|ACOX1-3_HUMAN Isoform of Q15067, Isoform 3 of Peroxisomal acyl-coenzyme A oxidase 1 OS=Homo sapiens OX=9606 GN=ACOX1 PE=1 SV=3;sp|Q15067-2|ACOX1-2_HUMAN Isoform of Q15067, Isoform 2 of Peroxisomal acyl-coenzyme A oxidase 1 OS=Homo sapiens OX=96	3	1	1	1	0	0	1	0	0	0	1	0	0	0	1	0	2.1	2.1	2.1	70.135	622	622;660;660	0.009887	1.4346	0.69994	0.92015	NaN	1	0	Median	NaN	NaN	0.69994	NaN	NaN	NaN	0.92015	NaN
RSU1	Ras suppressor protein 1	NaN	NaN	1.226	NaN	Q15404-2;Q15404	Q15404-2;Q15404	1;1	1;1	1;1	sp|Q15404-2|RSU1-2_HUMAN Isoform of Q15404, Isoform 2 of Ras suppressor protein 1 OS=Homo sapiens OX=9606 GN=RSU1 PE=1 SV=3;sp|Q15404|RSU1_HUMAN Ras suppressor protein 1 OS=Homo sapiens OX=9606 GN=RSU1 PE=1 SV=3	2	1	1	1	0	0	1	0	0	0	1	0	0	0	1	0	7.6	7.6	7.6	25.545	224	224;277	0.0023511	2.1405	0.89488	1.226	NaN	1	0	Median	NaN	NaN	0.89488	NaN	NaN	NaN	1.226	NaN
TAF5	Transcription initiation factor TFIID subunit 5	NaN	NaN	0.86075	NaN	Q15542-2;Q15542	Q15542-2;Q15542	2;2	2;2	2;2	sp|Q15542-2|TAF5-2_HUMAN Isoform of Q15542, Isoform Short of Transcription initiation factor TFIID subunit 5 OS=Homo sapiens OX=9606 GN=TAF5 PE=1 SV=3;sp|Q15542|TAF5_HUMAN Transcription initiation factor TFIID subunit 5 OS=Homo sapiens OX=9606 GN=TAF5 PE=1	2	2	2	2	0	0	2	1	0	0	2	1	0	0	2	1	3.9	3.9	3.9	80.507	745	745;800	0	3.5605	0.63288	0.86075	10.103	2	1	Median	NaN	NaN	0.63288	NaN	NaN	NaN	0.86075	NaN
TAF13	Transcription initiation factor TFIID subunit 13	NaN	NaN	0.82918	NaN	Q15543	Q15543	1	1	1	sp|Q15543|TAF13_HUMAN Transcription initiation factor TFIID subunit 13 OS=Homo sapiens OX=9606 GN=TAF13 PE=1 SV=1	1	1	1	1	0	0	1	0	0	0	1	0	0	0	1	0	8.9	8.9	8.9	14.287	124	124	0.0073556	1.6492	0.68143	0.82918	NaN	1	0	Median	NaN	NaN	0.68143	NaN	NaN	NaN	0.82918	NaN
MAPRE2	Microtubule-associated protein RP/EB family member 2	NaN	NaN	1.1109	NaN	Q15555-4;Q15555-5;Q15555-3;Q15555	Q15555-4;Q15555-5;Q15555-3;Q15555	1;1;1;1	1;1;1;1	1;1;1;1	sp|Q15555-4|MARE2-4_HUMAN Isoform of Q15555, Isoform 4 of Microtubule-associated protein RP/EB family member 2 OS=Homo sapiens OX=9606 GN=MAPRE2 PE=1 SV=1;sp|Q15555-5|MARE2-5_HUMAN Isoform of Q15555, Isoform 5 of Microtubule-associated protein RP/EB family	4	1	1	1	0	0	1	0	0	0	1	0	0	0	1	0	7.3	7.3	7.3	30.691	274	274;284;315;327	0.0019881	2.2602	0.74569	1.1109	NaN	1	0	Median	NaN	NaN	0.74569	NaN	NaN	NaN	1.1109	NaN
		NaN	NaN	0.30492	NaN	Q16650-2	Q16650-2	1	1	1	sp|Q16650-2|TBR1-2_HUMAN Isoform of Q16650, Isoform 2 of T-box brain protein 1 OS=Homo sapiens OX=9606 GN=TBR1 PE=2 SV=1	1	1	1	1	0	0	1	0	0	0	1	0	0	0	1	0	5.1	5.1	5.1	42.331	395	395	1	-2	0.22582	0.30492	NaN	1	0	Median	NaN	NaN	0.22582	NaN	NaN	NaN	0.30492	NaN
ARHGAP12	Rho GTPase-activating protein 12	NaN	NaN	0.92857	NaN	Q1RLN5;Q8IWW6-3;Q8IWW6-2;Q8IWW6-4;Q8IWW6	Q1RLN5;Q8IWW6-3;Q8IWW6-2;Q8IWW6-4;Q8IWW6	2;2;2;2;2	2;2;2;2;2	2;2;2;2;2	tr|Q1RLN5|Q1RLN5_HUMAN Isoform of Q8IWW6, ARHGAP12 protein OS=Homo sapiens OX=9606 GN=ARHGAP12 PE=1 SV=1;sp|Q8IWW6-3|RHG12-3_HUMAN Isoform of Q8IWW6, Isoform 3 of Rho GTPase-activating protein 12 OS=Homo sapiens OX=9606 GN=ARHGAP12 PE=1 SV=1;sp|Q8IWW6-2|RH	5	2	2	2	0	1	1	0	0	1	1	0	0	1	1	0	4.4	4.4	4.4	90.873	799	799;794;816;841;846	0	4.259	0.63121	0.92857	NaN	1	0	Median	NaN	NaN	0.63121	NaN	NaN	NaN	0.92857	NaN
DPCD	Protein DPCD	NaN	NaN	1.0418	NaN	Q5JQQ4;Q9BVM2	Q5JQQ4;Q9BVM2	1;1	1;1	1;1	tr|Q5JQQ4|Q5JQQ4_HUMAN Isoform of Q9BVM2, Protein DPCD OS=Homo sapiens OX=9606 GN=DPCD PE=1 SV=1;sp|Q9BVM2|DPCD_HUMAN Protein DPCD OS=Homo sapiens OX=9606 GN=DPCD PE=1 SV=2	2	1	1	1	0	0	1	0	0	0	1	0	0	0	1	0	5.9	5.9	5.9	19.486	170	170;203	0.0038008	1.9305	0.89184	1.0418	NaN	1	0	Median	NaN	NaN	0.89184	NaN	NaN	NaN	1.0418	NaN
KPRP	Keratinocyte proline-rich protein	NaN	NaN	NaN	NaN	Q5T749	Q5T749	1	1	1	sp|Q5T749|KPRP_HUMAN Keratinocyte proline-rich protein OS=Homo sapiens OX=9606 GN=KPRP PE=1 SV=1	1	1	1	1	1	0	0	1	1	0	0	1	1	0	0	1	4.1	4.1	4.1	64.135	579	579	0	15.793	NaN	NaN	NaN	0	0	Median	NaN	NaN	NaN	NaN	NaN	NaN	NaN	NaN
FBXO42	F-box only protein 42	NaN	NaN	NaN	NaN	X6RKU3;Q6P3S6	X6RKU3;Q6P3S6	1;1	1;1	1;1	tr|X6RKU3|X6RKU3_HUMAN Isoform of Q6P3S6, F-box only protein 42 (Fragment) OS=Homo sapiens OX=9606 GN=FBXO42 PE=1 SV=7;sp|Q6P3S6|FBX42_HUMAN F-box only protein 42 OS=Homo sapiens OX=9606 GN=FBXO42 PE=1 SV=1	2	1	1	1	1	0	0	0	1	0	0	0	1	0	0	0	11.7	11.7	11.7	30.958	298	298;717	1	-2	NaN	NaN	NaN	0	0	Median	NaN	NaN	NaN	NaN	NaN	NaN	NaN	NaN
SAMD1	Atherin	NaN	NaN	NaN	NaN	Q6SPF0;E9PIW9	Q6SPF0;E9PIW9	2;1	2;1	2;1	sp|Q6SPF0|SAMD1_HUMAN Atherin OS=Homo sapiens OX=9606 GN=SAMD1 PE=1 SV=1;tr|E9PIW9|E9PIW9_HUMAN Isoform of Q6SPF0, Atherin OS=Homo sapiens OX=9606 GN=SAMD1 PE=1 SV=1	2	2	2	2	1	0	2	0	1	0	2	0	1	0	2	0	6.9	6.9	6.9	56.051	538	538;432	0.0038023	1.9312	NaN	NaN	NaN	0	0	Median	NaN	NaN	NaN	NaN	NaN	NaN	NaN	NaN
SASS6	Spindle assembly abnormal protein 6 homolog	NaN	NaN	NaN	NaN	Q6UVJ0	Q6UVJ0	1	1	1	sp|Q6UVJ0|SAS6_HUMAN Spindle assembly abnormal protein 6 homolog OS=Homo sapiens OX=9606 GN=SASS6 PE=1 SV=1	1	1	1	1	0	0	1	0	0	0	1	0	0	0	1	0	2.1	2.1	2.1	74.396	657	657	0.009894	1.4358	NaN	NaN	NaN	0	0	Median	NaN	NaN	NaN	NaN	NaN	NaN	NaN	NaN
ATF7IP	Activating transcription factor 7-interacting protein 1	NaN	NaN	1.103	NaN	Q6VMQ6-2;Q6VMQ6-5;Q6VMQ6;Q6VMQ6-4	Q6VMQ6-2;Q6VMQ6-5;Q6VMQ6;Q6VMQ6-4	1;1;1;1	1;1;1;1	1;1;1;1	sp|Q6VMQ6-2|MCAF1-2_HUMAN Isoform of Q6VMQ6, Isoform 2 of Activating transcription factor 7-interacting protein 1 OS=Homo sapiens OX=9606 GN=ATF7IP PE=1 SV=3;sp|Q6VMQ6-5|MCAF1-5_HUMAN Isoform of Q6VMQ6, Isoform 4 of Activating transcription factor 7-intera	4	1	1	1	0	0	1	0	0	0	1	0	0	0	1	0	2.4	2.4	2.4	118.65	1105	1105;1269;1270;1278	0.0034456	1.9763	0.7963	1.103	NaN	1	1	Median	NaN	NaN	0.7963	NaN	NaN	NaN	1.103	NaN
ZFYVE16	Zinc finger FYVE domain-containing protein 16	NaN	NaN	NaN	NaN	Q7Z3T8	Q7Z3T8	2	2	2	sp|Q7Z3T8|ZFY16_HUMAN Zinc finger FYVE domain-containing protein 16 OS=Homo sapiens OX=9606 GN=ZFYVE16 PE=1 SV=3	1	2	2	2	1	0	0	1	1	0	0	1	1	0	0	1	1.6	1.6	1.6	168.9	1539	1539	0.0038081	1.9436	NaN	NaN	NaN	0	0	Median	NaN	NaN	NaN	NaN	NaN	NaN	NaN	NaN
USP48	Ubiquitin carboxyl-terminal hydrolase 48	NaN	NaN	NaN	NaN	Q86UV5-2;Q86UV5;Q86UV5-8;A0A0A0MRS6;Q86UV5-4;Q86UV5-7;Q86UV5-5;Q86UV5-3	Q86UV5-2;Q86UV5;Q86UV5-8;A0A0A0MRS6;Q86UV5-4;Q86UV5-7;Q86UV5-5;Q86UV5-3	2;2;2;1;1;1;1;1	2;2;2;1;1;1;1;1	2;2;2;1;1;1;1;1	sp|Q86UV5-2|UBP48-2_HUMAN Isoform of Q86UV5, Isoform 2 of Ubiquitin carboxyl-terminal hydrolase 48 OS=Homo sapiens OX=9606 GN=USP48 PE=1 SV=1;sp|Q86UV5|UBP48_HUMAN Ubiquitin carboxyl-terminal hydrolase 48 OS=Homo sapiens OX=9606 GN=USP48 PE=1 SV=1;sp|Q86UV	8	2	2	2	1	0	1	0	1	0	1	0	1	0	1	0	3.6	3.6	3.6	112.96	983	983;1035;1047;521;392;485;521;703	0	7.0344	NaN	NaN	NaN	0	0	Median	NaN	NaN	NaN	NaN	NaN	NaN	NaN	NaN
THNSL1	Threonine synthase-like 1	NaN	NaN	NaN	NaN	Q8IYQ7	Q8IYQ7	2	2	2	sp|Q8IYQ7|THNS1_HUMAN Threonine synthase-like 1 OS=Homo sapiens OX=9606 GN=THNSL1 PE=1 SV=2	1	2	2	2	1	1	0	0	1	1	0	0	1	1	0	0	4.3	4.3	4.3	83.069	743	743	0.007971	1.5755	NaN	NaN	NaN	0	0	Median	NaN	NaN	NaN	NaN	NaN	NaN	NaN	NaN
CHCHD4	Mitochondrial intermembrane space import and assembly protein 40	NaN	NaN	NaN	NaN	Q8N4Q1;Q8N4Q1-2	Q8N4Q1;Q8N4Q1-2	1;1	1;1	1;1	sp|Q8N4Q1|MIA40_HUMAN Mitochondrial intermembrane space import and assembly protein 40 OS=Homo sapiens OX=9606 GN=CHCHD4 PE=1 SV=1;sp|Q8N4Q1-2|MIA40-2_HUMAN Isoform of Q8N4Q1, Isoform 2 of Mitochondrial intermembrane space import and assembly protein 40 OS	2	1	1	1	1	0	0	0	1	0	0	0	1	0	0	0	16.9	16.9	16.9	15.996	142	142;155	0.00083612	2.6426	NaN	NaN	NaN	0	0	Median	NaN	NaN	NaN	NaN	NaN	NaN	NaN	NaN
SH2D3C	SH2 domain-containing protein 3C	NaN	NaN	5.7132	NaN	Q8N5H7	Q8N5H7	1	1	1	sp|Q8N5H7|SH2D3_HUMAN SH2 domain-containing protein 3C OS=Homo sapiens OX=9606 GN=SH2D3C PE=1 SV=1	1	1	1	1	0	0	1	0	0	0	1	0	0	0	1	0	2.8	2.8	2.8	94.41	860	860	1	-2	4.7082	5.7132	24.656	2	2	Median	NaN	NaN	4.7082	NaN	NaN	NaN	5.7132	NaN
ZNF454	Zinc finger protein 454	NaN	NaN	NaN	NaN	Q8N9F8	Q8N9F8	1	1	1	sp|Q8N9F8|ZN454_HUMAN Zinc finger protein 454 OS=Homo sapiens OX=9606 GN=ZNF454 PE=2 SV=2	1	1	1	1	1	0	0	0	1	0	0	0	1	0	0	0	3.3	3.3	3.3	60.007	522	522	1	-2	NaN	NaN	NaN	0	0	Median	NaN	NaN	NaN	NaN	NaN	NaN	NaN	NaN
CCDC79	Telomere repeats-binding bouquet formation protein 1	NaN	NaN	NaN	NaN	Q8NA31-3;Q8NA31-2;Q8NA31	Q8NA31-3;Q8NA31-2;Q8NA31	1;1;1	1;1;1	1;1;1	sp|Q8NA31-3|TERB1-3_HUMAN Isoform of Q8NA31, Isoform 3 of Telomere repeats-binding bouquet formation protein 1 OS=Homo sapiens OX=9606 GN=TERB1 PE=2 SV=3;sp|Q8NA31-2|TERB1-2_HUMAN Isoform of Q8NA31, Isoform 2 of Telomere repeats-binding bouquet formation p	3	1	1	1	1	0	0	0	1	0	0	0	1	0	0	0	3	3	3	57.964	508	508;550;727	0.0073448	1.6376	NaN	NaN	NaN	0	0	Median	NaN	NaN	NaN	NaN	NaN	NaN	NaN	NaN
SHCBP1	SHC SH2 domain-binding protein 1	NaN	NaN	1.3348	NaN	Q8NEM2	Q8NEM2	1	1	1	sp|Q8NEM2|SHCBP_HUMAN SHC SH2 domain-binding protein 1 OS=Homo sapiens OX=9606 GN=SHCBP1 PE=1 SV=3	1	1	1	1	0	0	1	0	0	0	1	0	0	0	1	0	2.1	2.1	2.1	75.69	672	672	0.0037994	1.9273	1.0899	1.3348	NaN	1	0	Median	NaN	NaN	1.0899	NaN	NaN	NaN	1.3348	NaN
PDZD8	PDZ domain-containing protein 8	NaN	NaN	0.97111	NaN	Q8NEN9	Q8NEN9	1	1	1	sp|Q8NEN9|PDZD8_HUMAN PDZ domain-containing protein 8 OS=Homo sapiens OX=9606 GN=PDZD8 PE=1 SV=1	1	1	1	1	0	0	1	0	0	0	1	0	0	0	1	0	1	1	1	128.56	1154	1154	0.0052161	1.7783	0.62436	0.97111	NaN	1	0	Median	NaN	NaN	0.62436	NaN	NaN	NaN	0.97111	NaN
NEDD1	Protein NEDD1	NaN	NaN	NaN	NaN	Q8NHV4-3;Q8NHV4-2;Q8NHV4;G3V2V3	Q8NHV4-3;Q8NHV4-2;Q8NHV4	3;2;2;1	3;2;2;1	3;2;2;1	sp|Q8NHV4-3|NEDD1-3_HUMAN Isoform of Q8NHV4, Isoform 3 of Protein NEDD1 OS=Homo sapiens OX=9606 GN=NEDD1 PE=1 SV=1;sp|Q8NHV4-2|NEDD1-2_HUMAN Isoform of Q8NHV4, Isoform 2 of Protein NEDD1 OS=Homo sapiens OX=9606 GN=NEDD1 PE=1 SV=1;sp|Q8NHV4|NEDD1_HUMAN Prot	4	3	3	3	1	2	1	0	1	2	1	0	1	2	1	0	7.8	7.8	7.8	72.709	667	667;571;660;167	0	58.503	NaN	NaN	NaN	0	0	Median	NaN	NaN	NaN	NaN	NaN	NaN	NaN	NaN
NPLOC4	Nuclear protein localization protein 4 homolog	NaN	NaN	1.7245	NaN	Q8TAT6;Q8TAT6-2	Q8TAT6;Q8TAT6-2	1;1	1;1	1;1	sp|Q8TAT6|NPL4_HUMAN Nuclear protein localization protein 4 homolog OS=Homo sapiens OX=9606 GN=NPLOC4 PE=1 SV=3;sp|Q8TAT6-2|NPL4-2_HUMAN Isoform of Q8TAT6, Isoform 2 of Nuclear protein localization protein 4 homolog OS=Homo sapiens OX=9606 GN=NPLOC4 PE=1 S	2	1	1	1	0	0	1	0	0	0	1	0	0	0	1	0	2.3	2.3	2.3	68.119	608	608;617	0.00081566	2.4453	1.1846	1.7245	NaN	1	0	Median	NaN	NaN	1.1846	NaN	NaN	NaN	1.7245	NaN
		NaN	NaN	NaN	NaN	Q8WWV3-2	Q8WWV3-2	1	1	1	sp|Q8WWV3-2|RT4I1-2_HUMAN Isoform of Q8WWV3, Isoform 2 of Reticulon-4-interacting protein 1, mitochondrial OS=Homo sapiens OX=9606 GN=RTN4IP1 PE=1 SV=2	1	1	1	1	0	1	0	0	0	1	0	0	0	1	0	0	3.7	3.7	3.7	32.235	296	296	1	-2	NaN	NaN	NaN	0	0	Median	NaN	NaN	NaN	NaN	NaN	NaN	NaN	NaN
BAALC	Brain and acute leukemia cytoplasmic protein	NaN	NaN	NaN	NaN	Q8WXS3-2;Q8WXS3	Q8WXS3-2;Q8WXS3	1;1	1;1	1;1	sp|Q8WXS3-2|BAALC-2_HUMAN Isoform of Q8WXS3, Isoform 2 of Brain and acute leukemia cytoplasmic protein OS=Homo sapiens OX=9606 GN=BAALC PE=2 SV=3;sp|Q8WXS3|BAALC_HUMAN Brain and acute leukemia cytoplasmic protein OS=Homo sapiens OX=9606 GN=BAALC PE=2 SV=3	2	1	1	1	0	0	0	1	0	0	0	1	0	0	0	1	14.5	14.5	14.5	15.551	145	145;180	1	-2	NaN	NaN	NaN	0	0	Median	NaN	NaN	NaN	NaN	NaN	NaN	NaN	NaN
PRRC1	Protein PRRC1	NaN	NaN	0.63804	NaN	Q96M27-4;Q96M27-5;Q96M27;Q96M27-3;Q96M27-2	Q96M27-4;Q96M27-5;Q96M27;Q96M27-3;Q96M27-2	1;1;1;1;1	1;1;1;1;1	1;1;1;1;1	sp|Q96M27-4|PRRC1-4_HUMAN Isoform of Q96M27, Isoform 4 of Protein PRRC1 OS=Homo sapiens OX=9606 GN=PRRC1 PE=1 SV=1;sp|Q96M27-5|PRRC1-5_HUMAN Isoform of Q96M27, Isoform 5 of Protein PRRC1 OS=Homo sapiens OX=9606 GN=PRRC1 PE=1 SV=1;sp|Q96M27|PRRC1_HUMAN Prot	5	1	1	1	1	1	1	0	1	1	1	0	1	1	1	0	4.8	4.8	4.8	31.425	311	311;418;445;462;464	0	7.7167	0.46988	0.63804	NaN	1	1	Median	NaN	NaN	0.46988	NaN	NaN	NaN	0.63804	NaN
RBM4B;RBM4	RNA-binding protein 4B;RNA-binding protein 4	NaN	NaN	NaN	NaN	Q9BQ04;Q9BWF3-4;E9PLB0;E9PM61;D6R9K7;U3KQD5;J3QRR5;Q9BWF3-3;Q9BWF3-2	Q9BQ04;Q9BWF3-4;E9PLB0;E9PM61;D6R9K7;U3KQD5;J3QRR5;Q9BWF3-3;Q9BWF3-2	4;3;2;2;2;2;2;2;2	1;0;0;0;0;0;0;0;0	1;0;0;0;0;0;0;0;0	sp|Q9BQ04|RBM4B_HUMAN RNA-binding protein 4B OS=Homo sapiens OX=9606 GN=RBM4B PE=1 SV=1;sp|Q9BWF3-4|RBM4-4_HUMAN Isoform of Q9BWF3, Isoform 4 of RNA-binding protein 4 OS=Homo sapiens OX=9606 GN=RBM4 PE=1 SV=1;tr|E9PLB0|E9PLB0_HUMAN Isoform of Q9BQ04, RNA-b	9	4	1	1	1	4	3	1	0	1	1	0	0	1	1	0	13.4	4.5	4.5	40.149	359	359;173;143;147;150;151;155;143;177	0	15.311	NaN	NaN	NaN	0	0	Median	NaN	NaN	NaN	NaN	NaN	NaN	NaN	NaN
ACAT2	Acetyl-CoA acetyltransferase, cytosolic	NaN	NaN	1.2254	NaN	Q9BWD1;Q9BWD1-2	Q9BWD1;Q9BWD1-2	1;1	1;1	1;1	sp|Q9BWD1|THIC_HUMAN Acetyl-CoA acetyltransferase, cytosolic OS=Homo sapiens OX=9606 GN=ACAT2 PE=1 SV=2;sp|Q9BWD1-2|THIC-2_HUMAN Isoform of Q9BWD1, Isoform 2 of Acetyl-CoA acetyltransferase, cytosolic OS=Homo sapiens OX=9606 GN=ACAT2 PE=1 SV=2	2	1	1	1	0	0	1	0	0	0	1	0	0	0	1	0	2.8	2.8	2.8	41.35	397	397;426	0.0023474	2.1267	0.87586	1.2254	NaN	1	0	Median	NaN	NaN	0.87586	NaN	NaN	NaN	1.2254	NaN
HINT2	Histidine triad nucleotide-binding protein 2, mitochondrial	NaN	NaN	0.91066	NaN	Q9BX68	Q9BX68	1	1	1	sp|Q9BX68|HINT2_HUMAN Histidine triad nucleotide-binding protein 2, mitochondrial OS=Homo sapiens OX=9606 GN=HINT2 PE=1 SV=1	1	1	1	1	0	0	1	0	0	0	1	0	0	0	1	0	12.3	12.3	12.3	17.162	163	163	0.00044209	3.3325	0.63241	0.91066	NaN	1	0	Median	NaN	NaN	0.63241	NaN	NaN	NaN	0.91066	NaN
ITPA	Inosine triphosphate pyrophosphatase	NaN	NaN	1.5751	NaN	Q9BY32-2;Q9BY32	Q9BY32-2;Q9BY32	1;1	1;1	1;1	sp|Q9BY32-2|ITPA-2_HUMAN Isoform of Q9BY32, Isoform 2 of Inosine triphosphate pyrophosphatase OS=Homo sapiens OX=9606 GN=ITPA PE=1 SV=2;sp|Q9BY32|ITPA_HUMAN Inosine triphosphate pyrophosphatase OS=Homo sapiens OX=9606 GN=ITPA PE=1 SV=2	2	1	1	1	0	0	1	0	0	0	1	0	0	0	1	0	9.6	9.6	9.6	19.603	177	177;194	0	3.7503	0.98064	1.5751	NaN	1	1	Median	NaN	NaN	0.98064	NaN	NaN	NaN	1.5751	NaN
TMX4	Thioredoxin-related transmembrane protein 4	NaN	NaN	1.3426	NaN	Q9H1E5	Q9H1E5	1	1	1	sp|Q9H1E5|TMX4_HUMAN Thioredoxin-related transmembrane protein 4 OS=Homo sapiens OX=9606 GN=TMX4 PE=1 SV=1	1	1	1	1	0	0	1	0	0	0	1	0	0	0	1	0	3.7	3.7	3.7	38.952	349	349	0.0023148	2.0248	1.1578	1.3426	NaN	1	0	Median	NaN	NaN	1.1578	NaN	NaN	NaN	1.3426	NaN
		NaN	NaN	NaN	NaN	Q9H503-2	Q9H503-2	1	1	1	sp|Q9H503-2|BAFL-2_HUMAN Isoform of Q9H503, Isoform 2 of Barrier-to-autointegration factor-like protein OS=Homo sapiens OX=9606 GN=BANF2 PE=1 SV=1	1	1	1	1	0	0	0	1	0	0	0	1	0	0	0	1	14.4	14.4	14.4	11.125	97	97	1	-2	NaN	NaN	NaN	0	0	Median	NaN	NaN	NaN	NaN	NaN	NaN	NaN	NaN
GEMIN7	Gem-associated protein 7	NaN	NaN	0.83574	NaN	Q9H840	Q9H840	1	1	1	sp|Q9H840|GEMI7_HUMAN Gem-associated protein 7 OS=Homo sapiens OX=9606 GN=GEMIN7 PE=1 SV=1	1	1	1	1	0	0	1	0	0	0	1	0	0	0	1	0	9.9	9.9	9.9	14.536	131	131	0.003811	1.9452	0.60863	0.83574	NaN	1	0	Median	NaN	NaN	0.60863	NaN	NaN	NaN	0.83574	NaN
ENY2	Transcription and mRNA export factor ENY2	NaN	NaN	NaN	NaN	Q9NPA8-2;Q9NPA8	Q9NPA8-2;Q9NPA8	1;1	1;1	1;1	sp|Q9NPA8-2|ENY2-2_HUMAN Isoform of Q9NPA8, Isoform 2 of Transcription and mRNA export factor ENY2 OS=Homo sapiens OX=9606 GN=ENY2 PE=1 SV=1;sp|Q9NPA8|ENY2_HUMAN Transcription and mRNA export factor ENY2 OS=Homo sapiens OX=9606 GN=ENY2 PE=1 SV=1	2	1	1	1	0	1	0	0	0	1	0	0	0	1	0	0	9.4	9.4	9.4	10.984	96	96;101	0	16.676	NaN	NaN	NaN	0	0	Median	NaN	NaN	NaN	NaN	NaN	NaN	NaN	NaN
ACP6	Lysophosphatidic acid phosphatase type 6	NaN	NaN	NaN	NaN	Q9NPH0	Q9NPH0	1	1	1	sp|Q9NPH0|PPA6_HUMAN Lysophosphatidic acid phosphatase type 6 OS=Homo sapiens OX=9606 GN=ACP6 PE=1 SV=3	1	1	1	1	0	1	0	0	0	1	0	0	0	1	0	0	4	4	4	48.886	428	428	0.00081699	2.4522	NaN	NaN	NaN	0	0	Median	NaN	NaN	NaN	NaN	NaN	NaN	NaN	NaN
PRDM5	PR domain zinc finger protein 5	NaN	NaN	NaN	NaN	Q9NQX1-3;Q9NQX1-4;Q9NQX1-2;Q9NQX1	Q9NQX1-3;Q9NQX1-4;Q9NQX1-2;Q9NQX1	1;1;1;1	1;1;1;1	1;1;1;1	sp|Q9NQX1-3|PRDM5-3_HUMAN Isoform of Q9NQX1, Isoform 3 of PR domain zinc finger protein 5 OS=Homo sapiens OX=9606 GN=PRDM5 PE=1 SV=2;sp|Q9NQX1-4|PRDM5-4_HUMAN Isoform of Q9NQX1, Isoform 4 of PR domain zinc finger protein 5 OS=Homo sapiens OX=9606 GN=PRDM5	4	1	1	1	0	0	0	1	0	0	0	1	0	0	0	1	10.8	10.8	10.8	12.874	111	111;501;599;630	1	-2	NaN	NaN	NaN	0	0	Median	NaN	NaN	NaN	NaN	NaN	NaN	NaN	NaN
GLRX2	Glutaredoxin-2, mitochondrial	NaN	NaN	2.2273	NaN	Q9NS18;Q9NS18-2	Q9NS18;Q9NS18-2	1;1	1;1	1;1	sp|Q9NS18|GLRX2_HUMAN Glutaredoxin-2, mitochondrial OS=Homo sapiens OX=9606 GN=GLRX2 PE=1 SV=1;sp|Q9NS18-2|GLRX2-2_HUMAN Isoform of Q9NS18, Isoform 2 of Glutaredoxin-2, mitochondrial OS=Homo sapiens OX=9606 GN=GLRX2 PE=1 SV=1	2	1	1	1	0	0	1	0	0	0	1	0	0	0	1	0	9.8	9.8	9.8	18.051	164	164;165	0.0019992	2.3071	1.1703	2.2273	NaN	1	0	Median	NaN	NaN	1.1703	NaN	NaN	NaN	2.2273	NaN
EXOC1	Exocyst complex component 1	NaN	NaN	NaN	NaN	Q9NV70-2;Q9NV70	Q9NV70-2;Q9NV70	1;1	1;1	1;1	sp|Q9NV70-2|EXOC1-2_HUMAN Isoform of Q9NV70, Isoform 2 of Exocyst complex component 1 OS=Homo sapiens OX=9606 GN=EXOC1 PE=1 SV=4;sp|Q9NV70|EXOC1_HUMAN Exocyst complex component 1 OS=Homo sapiens OX=9606 GN=EXOC1 PE=1 SV=4	2	1	1	1	0	0	1	0	0	0	1	0	0	0	1	0	2	2	2	100.28	879	879;894	0.0089542	1.5004	NaN	NaN	NaN	0	0	Median	NaN	NaN	NaN	NaN	NaN	NaN	NaN	NaN
CTTNBP2NL	CTTNBP2 N-terminal-like protein	NaN	NaN	NaN	NaN	Q9P2B4	Q9P2B4	1	1	1	sp|Q9P2B4|CT2NL_HUMAN CTTNBP2 N-terminal-like protein OS=Homo sapiens OX=9606 GN=CTTNBP2NL PE=1 SV=2	1	1	1	1	0	0	0	1	0	0	0	1	0	0	0	1	3.6	3.6	3.6	70.157	639	639	0.0099045	1.4387	NaN	NaN	NaN	0	0	Median	NaN	NaN	NaN	NaN	NaN	NaN	NaN	NaN
ADD3	Gamma-adducin	NaN	NaN	1.177	NaN	Q9UEY8-2;Q9UEY8	Q9UEY8-2;Q9UEY8	1;1	1;1	1;1	sp|Q9UEY8-2|ADDG-2_HUMAN Isoform of Q9UEY8, Isoform 1 of Gamma-adducin OS=Homo sapiens OX=9606 GN=ADD3 PE=1 SV=1;sp|Q9UEY8|ADDG_HUMAN Gamma-adducin OS=Homo sapiens OX=9606 GN=ADD3 PE=1 SV=1	2	1	1	1	0	0	1	0	0	0	1	0	0	0	1	0	2.4	2.4	2.4	75.67	674	674;706	0.0023175	2.0325	0.84253	1.177	NaN	1	0	Median	NaN	NaN	0.84253	NaN	NaN	NaN	1.177	NaN
DKFZp434G032		NaN	NaN	NaN	NaN	Q9UFN7	Q9UFN7	1	1	1	tr|Q9UFN7|Q9UFN7_HUMAN Isoform of Q9C075, Keratin, type I cytoskeletal 23 OS=Homo sapiens OX=9606 GN=KRT23 PE=1 SV=2	1	1	1	1	1	0	0	0	1	0	0	0	1	0	0	0	35.1	35.1	35.1	4.2901	37	37	1	-2	NaN	NaN	NaN	0	0	Median	NaN	NaN	NaN	NaN	NaN	NaN	NaN	NaN
ENOPH1	Enolase-phosphatase E1	NaN	NaN	1.2944	NaN	Q9UHY7	Q9UHY7	1	1	1	sp|Q9UHY7|ENOPH_HUMAN Enolase-phosphatase E1 OS=Homo sapiens OX=9606 GN=ENOPH1 PE=1 SV=1	1	1	1	1	0	0	1	0	0	0	1	0	0	0	1	0	4.6	4.6	4.6	28.932	261	261	0.0037936	1.9166	0.93656	1.2944	NaN	1	0	Median	NaN	NaN	0.93656	NaN	NaN	NaN	1.2944	NaN
ERRFI1	ERBB receptor feedback inhibitor 1	NaN	NaN	NaN	NaN	Q9UJM3	Q9UJM3	1	1	1	sp|Q9UJM3|ERRFI_HUMAN ERBB receptor feedback inhibitor 1 OS=Homo sapiens OX=9606 GN=ERRFI1 PE=1 SV=1	1	1	1	1	0	0	0	1	0	0	0	1	0	0	0	1	6.5	6.5	6.5	50.559	462	462	0	9.849	NaN	NaN	NaN	0	0	Median	NaN	NaN	NaN	NaN	NaN	NaN	NaN	NaN
FEM1B	Protein fem-1 homolog B	NaN	NaN	1.1089	NaN	Q9UK73	Q9UK73	1	1	1	sp|Q9UK73|FEM1B_HUMAN Protein fem-1 homolog B OS=Homo sapiens OX=9606 GN=FEM1B PE=1 SV=1	1	1	1	1	0	0	1	0	0	0	1	0	0	0	1	0	1.8	1.8	1.8	70.263	627	627	0.0073801	1.6613	0.99749	1.1089	NaN	1	0	Median	NaN	NaN	0.99749	NaN	NaN	NaN	1.1089	NaN
PALD1	Paladin	NaN	NaN	0.70336	NaN	Q9ULE6	Q9ULE6	1	1	1	sp|Q9ULE6|PALD_HUMAN Paladin OS=Homo sapiens OX=9606 GN=PALD1 PE=1 SV=3	1	1	1	1	0	0	1	0	0	0	1	0	0	0	1	0	1.5	1.5	1.5	96.753	856	856	0	4.4179	0.49176	0.70336	NaN	1	0	Median	NaN	NaN	0.49176	NaN	NaN	NaN	0.70336	NaN
TPX2	Targeting protein for Xklp2	NaN	NaN	1.188	NaN	Q9ULW0;Q9ULW0-2	Q9ULW0;Q9ULW0-2	1;1	1;1	1;1	sp|Q9ULW0|TPX2_HUMAN Targeting protein for Xklp2 OS=Homo sapiens OX=9606 GN=TPX2 PE=1 SV=2;sp|Q9ULW0-2|TPX2-2_HUMAN Isoform of Q9ULW0, Isoform 2 of Targeting protein for Xklp2 OS=Homo sapiens OX=9606 GN=TPX2 PE=1 SV=2	2	1	1	1	0	0	1	0	0	0	1	0	0	0	1	0	2.8	2.8	2.8	85.652	747	747;783	0.00042882	2.9351	0.93436	1.188	NaN	1	1	Median	NaN	NaN	0.93436	NaN	NaN	NaN	1.188	NaN
SNX8	Sorting nexin-8	NaN	NaN	0.84346	NaN	Q9Y5X2	Q9Y5X2	1	1	1	sp|Q9Y5X2|SNX8_HUMAN Sorting nexin-8 OS=Homo sapiens OX=9606 GN=SNX8 PE=1 SV=1	1	1	1	1	0	0	1	0	0	0	1	0	0	0	1	0	2.8	2.8	2.8	52.569	465	465	0.0066766	1.7102	0.67788	0.84346	NaN	1	0	Median	NaN	NaN	0.67788	NaN	NaN	NaN	0.84346	NaN
GMEB1	Glucocorticoid modulatory element-binding protein 1	NaN	NaN	NaN	NaN	Q9Y692-2;Q9Y692	Q9Y692-2;Q9Y692	1;1	1;1	1;1	sp|Q9Y692-2|GMEB1-2_HUMAN Isoform of Q9Y692, Isoform 2 of Glucocorticoid modulatory element-binding protein 1 OS=Homo sapiens OX=9606 GN=GMEB1 PE=1 SV=2;sp|Q9Y692|GMEB1_HUMAN Glucocorticoid modulatory element-binding protein 1 OS=Homo sapiens OX=9606 GN=GM	2	1	1	1	0	0	1	0	0	0	1	0	0	0	1	0	2.7	2.7	2.7	61.327	563	563;573	1	-2	NaN	NaN	NaN	0	0	Median	NaN	NaN	NaN	NaN	NaN	NaN	NaN	NaN
		NaN	NaN	6.0227	NaN	REV__A0A494C0Z1;REV__A0A494C075;REV__A0A087WYM5;REV__Q9BVV6-2;REV__Q9BVV6-4;REV__A0A494C0M8;REV__Q9BVV6;REV__A0A494C171;REV__Q9BVV6-3	REV__A0A494C0Z1;REV__A0A494C075;REV__A0A087WYM5;REV__Q9BVV6-2;REV__Q9BVV6-4;REV__A0A494C0M8;REV__Q9BVV6;REV__A0A494C171;REV__Q9BVV6-3	1;1;1;1;1;1;1;1;1	1;1;1;1;1;1;1;1;1	1;1;1;1;1;1;1;1;1	tr|A0A494C0Z1|A0A494C0Z1_HUMAN Isoform of Q9BVV6, Protein TALPID3 OS=Homo sapiens OX=9606 GN=KIAA0586 PE=4 SV=1;tr|A0A494C075|A0A494C075_HUMAN Isoform of Q9BVV6, Protein TALPID3 (Fragment) OS=Homo sapiens OX=9606 GN=KIAA0586 PE=4 SV=1;tr|A0A087WYM5|A0A087W	9	1	1	1	0	0	1	0	0	0	1	0	0	0	1	0	0	0	0	64.209	570	570;958;1463;1472;1504;1521;1533;1548;1644	1	-2	4.4602	6.0227	NaN	1	0	Median	NaN	NaN	4.4602	NaN	NaN	NaN	6.0227	NaN
		NaN	NaN	1.011	NaN	REV__A0A2R8YGC7;REV__A0A2R8Y6H2;REV__A0A2R8YFZ7;REV__Q14204	REV__A0A2R8YGC7;REV__A0A2R8Y6H2;REV__A0A2R8YFZ7;REV__Q14204	1;1;1;1	1;1;1;1	1;1;1;1	tr|A0A2R8YGC7|A0A2R8YGC7_HUMAN Isoform of Q14204, Cytoplasmic dynein 1 heavy chain 1 (Fragment) OS=Homo sapiens OX=9606 GN=DYNC1H1 PE=1 SV=1;tr|A0A2R8Y6H2|A0A2R8Y6H2_HUMAN Isoform of Q14204, Cytoplasmic dynein 1 heavy chain 1 (Fragment) OS=Homo sapiens OX=	4	1	1	1	0	0	1	0	0	0	1	0	0	0	1	0	0	0	0	47.857	421	421;1400;1686;4646	1	-2	0.73866	1.011	NaN	1	0	Median	NaN	NaN	0.73866	NaN	NaN	NaN	1.011	NaN
		NaN	NaN	0.90414	NaN	REV__A0A3B3ITS3;REV__A0A3B3IS54;REV__A0A3B3IS01;REV__A0A3B3IT01;REV__A0A3B3ISK7;REV__Q6PI48	REV__A0A3B3ITS3;REV__A0A3B3IS54;REV__A0A3B3IS01;REV__A0A3B3IT01;REV__A0A3B3ISK7;REV__Q6PI48	1;1;1;1;1;1	1;1;1;1;1;1	1;1;1;1;1;1	tr|A0A3B3ITS3|A0A3B3ITS3_HUMAN Isoform of Q6PI48, Aspartate--tRNA ligase, mitochondrial OS=Homo sapiens OX=9606 GN=DARS2 PE=1 SV=1;tr|A0A3B3IS54|A0A3B3IS54_HUMAN Isoform of Q6PI48, Aspartate--tRNA ligase, mitochondrial OS=Homo sapiens OX=9606 GN=DARS2 PE=1	6	1	1	1	0	0	1	0	0	0	1	0	0	0	1	0	0	0	0	55.527	482	482;484;539;594;624;645	1	-2	0.60118	0.90414	NaN	1	0	Median	NaN	NaN	0.60118	NaN	NaN	NaN	0.90414	NaN
		NaN	NaN	1.1025	NaN	REV__E5RHK6;REV__Q5TF93;REV__Q9Y5J3;REV__Q9Y5J3-2;REV__Q9UBP5	REV__E5RHK6;REV__Q5TF93;REV__Q9Y5J3;REV__Q9Y5J3-2;REV__Q9UBP5	1;1;1;1;1	1;1;1;1;1	1;1;1;1;1	tr|E5RHK6|E5RHK6_HUMAN Isoform of Q9Y5J3, Hairy/enhancer-of-split-related with YRPW motif protein 1 (Fragment) OS=Homo sapiens OX=9606 GN=HEY1 PE=1 SV=1;tr|Q5TF93|Q5TF93_HUMAN Isoform of Q9UBP5, Hairy/enhancer-of-split-related with YRPW motif protein 2 OS=	5	1	1	1	0	0	1	0	0	0	1	0	0	0	1	0	0	0	0	20.448	186	186;291;304;308;337	1	-2	0.94346	1.1025	NaN	1	0	Median	NaN	NaN	0.94346	NaN	NaN	NaN	1.1025	NaN
		NaN	NaN	0.97623	NaN	REV__H7C548;REV__E7EQG5;REV__Q6ZTQ4	REV__H7C548;REV__E7EQG5;REV__Q6ZTQ4	1;1;1	1;1;1	1;1;1	tr|H7C548|H7C548_HUMAN Isoform of Q6ZTQ4, Cadherin-related family member 3 (Fragment) OS=Homo sapiens OX=9606 GN=CDHR3 PE=4 SV=1;tr|E7EQG5|E7EQG5_HUMAN Isoform of Q6ZTQ4, Cadherin-related family member 3 OS=Homo sapiens OX=9606 GN=CDHR3 PE=4 SV=1;sp|Q6ZTQ4	3	1	1	1	0	0	1	0	0	0	1	0	0	0	1	0	0	0	0	17.808	161	161;797;885	1	-2	0.64874	0.97623	NaN	1	0	Median	NaN	NaN	0.64874	NaN	NaN	NaN	0.97623	NaN
		NaN	NaN	NaN	NaN	REV__Q9UMS6-5;REV__Q9UMS6;REV__Q9UMS6-3;REV__H0Y9Y3;REV__Q9UMS6-4;REV__Q9UMS6-2	REV__Q9UMS6-5;REV__Q9UMS6;REV__Q9UMS6-3;REV__H0Y9Y3;REV__Q9UMS6-4;REV__Q9UMS6-2	1;1;1;1;1;1	1;1;1;1;1;1	1;1;1;1;1;1	sp|Q9UMS6-5|SYNP2-5_HUMAN Isoform of Q9UMS6, Isoform 5 of Synaptopodin-2 OS=Homo sapiens OX=9606 GN=SYNPO2 PE=1 SV=2;sp|Q9UMS6|SYNP2_HUMAN Synaptopodin-2 OS=Homo sapiens OX=9606 GN=SYNPO2 PE=1 SV=2;sp|Q9UMS6-3|SYNP2-3_HUMAN Isoform of Q9UMS6, Isoform 3 of	6	1	1	1	1	0	0	0	1	0	0	0	1	0	0	0	0	0	0	74.761	698	698;1093;1109;1155;1230;1261	1	-2	NaN	NaN	NaN	0	0	Median	NaN	NaN	NaN	NaN	NaN	NaN	NaN	NaN
		NaN	NaN	1.1084	NaN	REV__Q96JM2-2;REV__H3BLX4;REV__Q96JM2;REV__Q96JM2-3	REV__Q96JM2-2;REV__H3BLX4;REV__Q96JM2;REV__Q96JM2-3	1;1;1;1	1;1;1;1	1;1;1;1	sp|Q96JM2-2|ZN462-2_HUMAN Isoform of Q96JM2, Isoform 2 of Zinc finger protein 462 OS=Homo sapiens OX=9606 GN=ZNF462 PE=1 SV=3;tr|H3BLX4|H3BLX4_HUMAN Isoform of Q96JM2, Zinc finger protein 462 (Fragment) OS=Homo sapiens OX=9606 GN=ZNF462 PE=1 SV=1;sp|Q96JM2	4	1	1	1	0	0	1	0	0	0	1	0	0	0	1	0	0	0	0	161.53	1412	1412;1449;2506;2566	0.0045096	1.8473	0.84899	1.1084	NaN	1	0	Median	NaN	NaN	0.84899	NaN	NaN	NaN	1.1084	NaN
		NaN	NaN	0.84361	NaN	REV__K7EJZ6;REV__K7ELI4;REV__P13994	REV__K7EJZ6;REV__K7ELI4;REV__P13994	1;1;1	1;1;1	1;1;1	tr|K7EJZ6|K7EJZ6_HUMAN Isoform of P13994, Coiled-coil domain-containing protein 130 (Fragment) OS=Homo sapiens OX=9606 GN=CCDC130 PE=1 SV=1;tr|K7ELI4|K7ELI4_HUMAN Isoform of P13994, Coiled-coil domain-containing protein 130 (Fragment) OS=Homo sapiens OX=96	3	1	1	1	0	0	1	0	0	0	1	0	0	0	1	0	0	0	0	21.253	190	190;237;396	0.0052258	1.7835	0.52624	0.84361	NaN	1	0	Median	NaN	NaN	0.52624	NaN	NaN	NaN	0.84361	NaN
		NaN	NaN	1.0397	NaN	REV__O15144	REV__O15144	1	1	1	sp|O15144|ARPC2_HUMAN Actin-related protein 2/3 complex subunit 2 OS=Homo sapiens OX=9606 GN=ARPC2 PE=1 SV=1	1	1	1	1	0	0	1	0	0	0	1	0	0	0	1	0	0	0	0	34.333	300	300	0.006684	1.7133	0.66567	1.0397	NaN	1	0	Median	NaN	NaN	0.66567	NaN	NaN	NaN	1.0397	NaN
		NaN	NaN	NaN	NaN	REV__Q8N158	REV__Q8N158	1	1	1	sp|Q8N158|GPC2_HUMAN Glypican-2 OS=Homo sapiens OX=9606 GN=GPC2 PE=2 SV=1	1	1	1	1	1	0	1	0	1	0	1	0	1	0	1	0	0	0	0	62.829	579	579	1	-2	NaN	NaN	NaN	0	0	Median	NaN	NaN	NaN	NaN	NaN	NaN	NaN	NaN
		NaN	NaN	1.0531	NaN	REV__Q96DE0-2;REV__Q96DE0-4	REV__Q96DE0-2;REV__Q96DE0-4	1;1	1;1	1;1	sp|Q96DE0-2|NUD16-2_HUMAN Isoform of Q96DE0, Isoform 2 of U8 snoRNA-decapping enzyme OS=Homo sapiens OX=9606 GN=NUDT16 PE=1 SV=2;sp|Q96DE0-4|NUD16-4_HUMAN Isoform of Q96DE0, Isoform 4 of U8 snoRNA-decapping enzyme OS=Homo sapiens OX=9606 GN=NUDT16 PE=1 SV=	2	1	1	1	0	0	1	0	0	0	1	0	0	0	1	0	0	0	0	21.816	194	194;227	1	-2	0.54993	1.0531	NaN	1	0	Median	NaN	NaN	0.54993	NaN	NaN	NaN	1.0531	NaN
		NaN	NaN	1.2217	NaN	REV__Q9NRR4-3;REV__Q9NRR4-2;REV__Q9NRR4-4;REV__Q9NRR4	REV__Q9NRR4-3;REV__Q9NRR4-2;REV__Q9NRR4-4;REV__Q9NRR4	1;1;1;1	1;1;1;1	1;1;1;1	sp|Q9NRR4-3|RNC-3_HUMAN Isoform of Q9NRR4, Isoform 3 of Ribonuclease 3 OS=Homo sapiens OX=9606 GN=DROSHA PE=1 SV=2;sp|Q9NRR4-2|RNC-2_HUMAN Isoform of Q9NRR4, Isoform 2 of Ribonuclease 3 OS=Homo sapiens OX=9606 GN=DROSHA PE=1 SV=2;sp|Q9NRR4-4|RNC-4_HUMAN Is	4	1	1	1	0	0	1	0	0	0	1	0	0	0	1	0	0	0	0	138.16	1192	1192;1306;1337;1374	0.0073855	1.6656	0.63425	1.2217	NaN	1	0	Median	NaN	NaN	0.63425	NaN	NaN	NaN	1.2217	NaN
DNAJC28	DnaJ homolog subfamily C member 28	NaN	22.51	7.4869	NaN	Q9NX36	Q9NX36	2	2	2	sp|Q9NX36|DJC28_HUMAN DnaJ homolog subfamily C member 28 OS=Homo sapiens OX=9606 GN=DNAJC28 PE=1 SV=2	1	2	2	2	0	1	1	0	0	1	1	0	0	1	1	0	6.4	6.4	6.4	45.805	388	388	0.0030675	1.9898	10.663	12.982	77.838	2	2	Median	NaN	23.709	4.7954	NaN	NaN	22.51	7.4869	NaN
ATP5J2;ATP5J2-PTCD1	ATP synthase subunit f, mitochondrial	NaN	9.1817	NaN	NaN	P56134-3;P56134;C9JJT5;C9JU26;P56134-4;P56134-2	P56134-3;P56134;C9JJT5;C9JU26;P56134-4;P56134-2	3;3;2;2;2;2	1;1;0;0;0;0	1;1;0;0;0;0	sp|P56134-3|ATPK-3_HUMAN Isoform of P56134, Isoform 3 of ATP synthase subunit f, mitochondrial OS=Homo sapiens OX=9606 GN=ATP5MF PE=1 SV=3;sp|P56134|ATPK_HUMAN ATP synthase subunit f, mitochondrial OS=Homo sapiens OX=9606 GN=ATP5MF PE=1 SV=3;tr|C9JJT5|C9JJ	6	3	1	1	2	3	2	2	0	1	0	0	0	1	0	0	67.3	23.6	23.6	6.2953	55	55;94;54;98;49;88	1	-2	10.037	9.1817	NaN	1	1	Median	NaN	10.037	NaN	NaN	NaN	9.1817	NaN	NaN
NOL10	Nucleolar protein 10	NaN	3.6991	NaN	NaN	Q9BSC4-2;Q9BSC4-4;Q9BSC4	Q9BSC4-2;Q9BSC4-4;Q9BSC4	1;1;1	1;1;1	1;1;1	sp|Q9BSC4-2|NOL10-2_HUMAN Isoform of Q9BSC4, Isoform 2 of Nucleolar protein 10 OS=Homo sapiens OX=9606 GN=NOL10 PE=1 SV=1;sp|Q9BSC4-4|NOL10-4_HUMAN Isoform of Q9BSC4, Isoform 4 of Nucleolar protein 10 OS=Homo sapiens OX=9606 GN=NOL10 PE=1 SV=1;sp|Q9BSC4|NO	3	1	1	1	0	1	0	0	0	1	0	0	0	1	0	0	2.2	2.2	2.2	74.508	638	638;662;688	1	-2	3.4448	3.6991	NaN	1	1	Median	NaN	3.4448	NaN	NaN	NaN	3.6991	NaN	NaN
TMED9	Transmembrane emp24 domain-containing protein 9	NaN	3.5617	NaN	NaN	Q9BVK6	Q9BVK6	2	2	2	sp|Q9BVK6|TMED9_HUMAN Transmembrane emp24 domain-containing protein 9 OS=Homo sapiens OX=9606 GN=TMED9 PE=1 SV=2	1	2	2	2	0	2	0	0	0	2	0	0	0	2	0	0	8.9	8.9	8.9	27.277	235	235	0.0041667	1.9098	4.6565	3.5617	265.28	2	1	Median	NaN	4.6565	NaN	NaN	NaN	3.5617	NaN	NaN
PFDN1	Prefoldin subunit 1	0.41452	2.6852	0.48851	NaN	E5RGS4;O60925	E5RGS4;O60925	2;2	2;2	2;2	tr|E5RGS4|E5RGS4_HUMAN Isoform of O60925, Prefoldin subunit 1 OS=Homo sapiens OX=9606 GN=PFDN1 PE=1 SV=1;sp|O60925|PFD1_HUMAN Prefoldin subunit 1 OS=Homo sapiens OX=9606 GN=PFDN1 PE=1 SV=2	2	2	2	2	2	1	1	0	2	1	1	0	2	1	1	0	17.9	17.9	17.9	13.466	117	117;122	0	6.3825	0.41653	0.45292	10.696	4	0	Leave out requantified	0.41653	3.5268	0.25373	NaN	0.41452	2.6852	0.48851	NaN
VBP1	Prefoldin subunit 3	0.5023	2.1894	0.40175	NaN	P61758-2;P61758	P61758-2;P61758	3;3	3;3	3;3	sp|P61758-2|PFD3-2_HUMAN Isoform of P61758, Isoform 2 of Prefoldin subunit 3 OS=Homo sapiens OX=9606 GN=VBP1 PE=1 SV=4;sp|P61758|PFD3_HUMAN Prefoldin subunit 3 OS=Homo sapiens OX=9606 GN=VBP1 PE=1 SV=4	2	3	3	3	2	3	1	0	2	3	1	0	2	3	1	0	16.1	16.1	16.1	22.254	192	192;197	0	3.9834	1.2873	1.102	75.025	6	0	Leave out requantified	0.51372	2.9187	0.20259	NaN	0.5023	2.1894	0.40175	NaN
FARP1	FERM, RhoGEF and pleckstrin domain-containing protein 1	1.7942	2.0806	0.95991	NaN	C9JME2;Q9Y4F1;Q9Y4F1-2;M0QYB0;H0Y783;M0QXT1;A0A1B0GV68;Q9Y4F1-3	C9JME2;Q9Y4F1;Q9Y4F1-2	3;3;3;1;1;1;1;1	3;3;3;1;1;1;1;1	3;3;3;1;1;1;1;1	tr|C9JME2|C9JME2_HUMAN Isoform of Q9Y4F1, FERM, ARHGEF and pleckstrin domain-containing protein 1 OS=Homo sapiens OX=9606 GN=FARP1 PE=1 SV=2;sp|Q9Y4F1|FARP1_HUMAN FERM, ARHGEF and pleckstrin domain-containing protein 1 OS=Homo sapiens OX=9606 GN=FARP1 PE=1	8	3	3	3	2	3	2	0	2	3	2	0	2	3	2	0	3.6	3.6	3.6	122.09	1076	1076;1045;1076;203;215;248;801;129	0.00043573	3.1539	1.2924	1.3927	43.26	6	5	Median	1.9353	1.9458	0.6417	NaN	1.7942	2.0806	0.95991	NaN
AP2S1	AP-2 complex subunit sigma	NaN	1.923	NaN	NaN	M0QZ21;M0R0N4;X6R390;M0QYZ2;P53680-2;P53680;M0R1S0	M0QZ21;M0R0N4;X6R390;M0QYZ2;P53680-2;P53680;M0R1S0	2;2;2;2;2;2;1	2;2;2;2;2;2;1	2;2;2;2;2;2;1	tr|M0QZ21|M0QZ21_HUMAN Isoform of P53680, AP complex subunit sigma OS=Homo sapiens OX=9606 GN=AP2S1 PE=1 SV=1;tr|M0R0N4|M0R0N4_HUMAN Isoform of P53680, AP complex subunit sigma OS=Homo sapiens OX=9606 GN=AP2S1 PE=1 SV=1;tr|X6R390|X6R390_HUMAN Isoform of P5	7	2	2	2	0	2	1	0	0	2	1	0	0	2	1	0	19.7	19.7	19.7	14.557	122	122;144;156;158;104;142;92	0	3.663	1.7687	1.923	NaN	1	0	Median	NaN	1.7687	NaN	NaN	NaN	1.923	NaN	NaN
PDCD5	Programmed cell death protein 5	0.89406	1.7894	NaN	NaN	K7EQA1;O14737;K7ESJ4;O14737-2	K7EQA1;O14737;K7ESJ4;O14737-2	2;2;1;1	2;2;1;1	2;2;1;1	tr|K7EQA1|K7EQA1_HUMAN Isoform of O14737, Programmed cell death protein 5 OS=Homo sapiens OX=9606 GN=PDCD5 PE=1 SV=1;sp|O14737|PDCD5_HUMAN Programmed cell death protein 5 OS=Homo sapiens OX=9606 GN=PDCD5 PE=1 SV=3;tr|K7ESJ4|K7ESJ4_HUMAN Isoform of O14737,	4	2	2	2	2	1	1	0	2	1	1	0	2	1	1	0	27.6	27.6	27.6	10.004	87	87;125;65;129	0	7.6035	1.0551	1.0516	43.222	3	1	Median	0.90403	1.9857	NaN	NaN	0.89406	1.7894	NaN	NaN
MAP1B	Microtubule-associated protein 1B;MAP1B heavy chain;MAP1 light chain LC1	0.45184	1.759	NaN	NaN	P46821;D6RA40;D6RA32	P46821;D6RA40;D6RA32	2;1;1	2;1;1	2;1;1	sp|P46821|MAP1B_HUMAN Microtubule-associated protein 1B OS=Homo sapiens OX=9606 GN=MAP1B PE=1 SV=2;tr|D6RA40|D6RA40_HUMAN Isoform of P46821, Microtubule-associated protein 1B (Fragment) OS=Homo sapiens OX=9606 GN=MAP1B PE=1 SV=1;tr|D6RA32|D6RA32_HUMAN Isof	3	2	2	2	2	1	0	1	2	1	0	1	2	1	0	1	1.3	1.3	1.3	270.63	2468	2468;569;670	0	12.009	0.54186	0.50962	79.387	3	1	Median	0.48342	1.568	NaN	NaN	0.45184	1.759	NaN	NaN
SORT1	Sortilin	NaN	1.6618	NaN	NaN	Q99523-2;Q99523	Q99523-2;Q99523	1;1	1;1	1;1	sp|Q99523-2|SORT-2_HUMAN Isoform of Q99523, Isoform 2 of Sortilin OS=Homo sapiens OX=9606 GN=SORT1 PE=1 SV=3;sp|Q99523|SORT_HUMAN Sortilin OS=Homo sapiens OX=9606 GN=SORT1 PE=1 SV=3	2	1	1	1	0	1	0	0	0	1	0	0	0	1	0	0	2.2	2.2	2.2	77.374	694	694;831	0.00043649	3.1693	1.496	1.6618	NaN	1	0	Median	NaN	1.496	NaN	NaN	NaN	1.6618	NaN	NaN
RNF10	RING finger protein 10	NaN	1.6491	NaN	NaN	Q8N5U6;Q8N5U6-2;H0YG28;H0YFQ9;H0YGX5	Q8N5U6;Q8N5U6-2;H0YG28;H0YFQ9;H0YGX5	2;2;1;1;1	2;2;1;1;1	2;2;1;1;1	sp|Q8N5U6|RNF10_HUMAN RING finger protein 10 OS=Homo sapiens OX=9606 GN=RNF10 PE=1 SV=2;sp|Q8N5U6-2|RNF10-2_HUMAN Isoform of Q8N5U6, Isoform 2 of RING finger protein 10 OS=Homo sapiens OX=9606 GN=RNF10 PE=1 SV=2;tr|H0YG28|H0YG28_HUMAN Isoform of Q8N5U6, RI	5	2	2	2	0	1	0	1	0	1	0	1	0	1	0	1	3.3	3.3	3.3	89.926	811	811;816;146;211;261	0.0019841	2.2347	1.5757	1.6491	NaN	1	0	Median	NaN	1.5757	NaN	NaN	NaN	1.6491	NaN	NaN
HLA-C;HLA-A;HLA-B	HLA class I histocompatibility antigen, Cw-7 alpha chain;HLA class I histocompatibility antigen, Cw-17 alpha chain;HLA class I histocompatibility antigen, A-69 alpha chain;HLA class I histocompatibility antigen, B-73 alpha chain;HLA class I histocompatibility antigen, A-2 alpha chain;HLA class I histocompatibility antigen, Cw-1 alpha chain	0.52131	1.4833	0.89208	NaN	A0A140T9H5;A0A140T9U8;A2AEA2;P10321;A0A140T921;O19617;Q95604;A0A1W2PRU9;A0A1W2PPQ2;A0A140T9I0;A0A1W2PRT9;P10316;Q31612;A0A140T933;A0A140T913;A0A140T9X5;A0A140T955;P01892;P30499;F8W9Z8;A0A140T9L3;A0A140TA12;A0A140T942;Q31610;P30486;A0A140T9Z7;A0A140T9E1;A0A140TA05;A0A140TA21;A0A140T9M5;A0A140T9Q4;A0A140TA19;A0A140T9T1;F6U0H7;A0A140T9Z4;A0A140T9S7;A0A140T9D4;A0A140TA03;A0A0G2JKJ1	A0A140T9H5;A0A140T9U8;A2AEA2;P10321;A0A140T921;O19617;Q95604;A0A1W2PRU9;A0A1W2PPQ2;A0A140T9I0;A0A1W2PRT9;P10316;Q31612;A0A140T933;A0A140T913;A0A140T9X5;A0A140T955;P01892;P30499	6;6;6;6;6;6;5;4;4;4;4;4;4;4;4;4;4;4;3;2;2;2;2;2;2;2;2;2;1;1;1;1;1;1;1;1;1;1;1	1;1;1;1;1;1;1;1;1;1;1;1;1;1;1;1;1;1;0;0;0;0;0;0;0;0;0;0;0;0;0;0;0;0;0;0;0;0;0	1;1;1;1;1;1;1;1;1;1;1;1;1;1;1;1;1;1;0;0;0;0;0;0;0;0;0;0;0;0;0;0;0;0;0;0;0;0;0	tr|A0A140T9H5|A0A140T9H5_HUMAN Isoform of Q95604, HLA class I histocompatibility antigen, Cw-6 alpha chain OS=Homo sapiens OX=9606 GN=HLA-C PE=1 SV=1;tr|A0A140T9U8|A0A140T9U8_HUMAN Isoform of Q95604, HLA class I histocompatibility antigen, Cw-6 alpha chain	39	6	1	1	2	5	3	2	1	1	1	0	1	1	1	0	17.5	3.5	3.5	41.363	372	372;397;372;366;368;366;372;244;339;365;362;365;363;299;371;371;299;365;366;131;261;131;261;362;362;131;261;224;224;261;261;224;261;246;131;261;246;131;131	0.0023033	2.0007	1.3173	1.4833	52.291	3	2	Plateau	0.54366	1.412	0.55048	NaN	0.52131	1.4833	0.89208	NaN
DDX42	ATP-dependent RNA helicase DDX42	NaN	1.4739	1.4018	NaN	Q86XP3;A0A0A0MSJ0;Q86XP3-2;J3QRI2;J3KTK9	Q86XP3;A0A0A0MSJ0;Q86XP3-2	6;5;5;1;1	6;5;5;1;1	6;5;5;1;1	sp|Q86XP3|DDX42_HUMAN ATP-dependent RNA helicase DDX42 OS=Homo sapiens OX=9606 GN=DDX42 PE=1 SV=1;tr|A0A0A0MSJ0|A0A0A0MSJ0_HUMAN Isoform of Q86XP3, ATP-dependent RNA helicase DDX42 OS=Homo sapiens OX=9606 GN=DDX42 PE=1 SV=1;sp|Q86XP3-2|DDX42-2_HUMAN Isofor	5	6	6	6	2	2	4	0	2	2	4	0	2	2	4	0	11	11	11	102.97	938	938;708;819;104;159	0	13.842	0.87105	1.4113	10.049	4	1	Median	NaN	1.3907	0.85785	NaN	NaN	1.4739	1.4018	NaN
VPS53	Vacuolar protein sorting-associated protein 53 homolog	NaN	1.4733	0.86805	NaN	Q5VIR6-4;E7EVT8;F6VX93;Q5VIR6-2;Q5VIR6-3;Q5VIR6	Q5VIR6-4;E7EVT8;F6VX93;Q5VIR6-2;Q5VIR6-3;Q5VIR6	2;1;1;1;1;1	2;1;1;1;1;1	2;1;1;1;1;1	sp|Q5VIR6-4|VPS53-4_HUMAN Isoform of Q5VIR6, Isoform 4 of Vacuolar protein sorting-associated protein 53 homolog OS=Homo sapiens OX=9606 GN=VPS53 PE=1 SV=1;tr|E7EVT8|E7EVT8_HUMAN Isoform of Q5VIR6, Vacuolar protein sorting-associated protein 53 homolog OS=	6	2	2	2	0	1	1	0	0	1	1	0	0	1	1	0	3.6	3.6	3.6	94.404	832	832;422;547;670;673;699	0	4.6711	0.96582	1.1309	37.405	2	0	Median	NaN	1.4333	0.65082	NaN	NaN	1.4733	0.86805	NaN
DNAAF2	Protein kintoun	NaN	1.4406	NaN	NaN	Q9NVR5-2;Q9NVR5	Q9NVR5-2;Q9NVR5	1;1	1;1	1;1	sp|Q9NVR5-2|KTU-2_HUMAN Isoform of Q9NVR5, Isoform 2 of Protein kintoun OS=Homo sapiens OX=9606 GN=DNAAF2 PE=1 SV=2;sp|Q9NVR5|KTU_HUMAN Protein kintoun OS=Homo sapiens OX=9606 GN=DNAAF2 PE=1 SV=2	2	1	1	1	0	1	0	0	0	1	0	0	0	1	0	0	1.6	1.6	1.6	85.599	789	789;837	1	-2	1.7372	1.4406	NaN	1	0	Median	NaN	1.7372	NaN	NaN	NaN	1.4406	NaN	NaN
ATP1A1;ATP1A2;ATP1A3	Sodium/potassium-transporting ATPase subunit alpha-1;Sodium/potassium-transporting ATPase subunit alpha-2;Sodium/potassium-transporting ATPase subunit alpha-3	2.1862	1.4171	0.79486	NaN	P05023-4;P05023-3;P05023;P05023-2;A0A2R8YEY8;B1AKY9;A0A0A0MT26;M0R116;P50993;P13637;P13637-2;P13637-3;H0Y7C1;Q13733;P20648;M0QXF2;E9PRA5;P54707;P54707-2;Q5TC01;Q5TC02	P05023-4;P05023-3;P05023;P05023-2;A0A2R8YEY8;B1AKY9;A0A0A0MT26;M0R116;P50993;P13637;P13637-2;P13637-3	7;7;7;5;4;4;4;4;4;4;4;4;3;2;2;1;1;1;1;1;1	7;7;7;5;4;4;4;4;4;4;4;4;3;2;2;1;1;1;1;1;1	7;7;7;5;4;4;4;4;4;4;4;4;3;2;2;1;1;1;1;1;1	sp|P05023-4|AT1A1-4_HUMAN Isoform of P05023, Isoform 4 of Sodium/potassium-transporting ATPase subunit alpha-1 OS=Homo sapiens OX=9606 GN=ATP1A1 PE=1 SV=1;sp|P05023-3|AT1A1-3_HUMAN Isoform of P05023, Isoform 3 of Sodium/potassium-transporting ATPase subuni	21	7	7	7	2	4	3	2	2	4	3	2	2	4	3	2	10.2	10.2	10.2	113	1023	1023;992;1023;681;1010;1009;1226;983;1020;1013;1024;1026;714;1029;1035;251;517;1039;1045;144;106	0	35.564	0.70295	0.93051	22.284	7	3	Leave out requantified	2.3661	1.3433	0.49322	NaN	2.1862	1.4171	0.79486	NaN
DNAJB12	DnaJ homolog subfamily B member 12	NaN	1.4072	NaN	NaN	V9GYN7;J3KPS0;Q9NXW2;Q9NXW2-2	V9GYN7;J3KPS0;Q9NXW2;Q9NXW2-2	2;2;2;2	2;2;2;2	2;2;2;2	tr|V9GYN7|V9GYN7_HUMAN Isoform of Q9NXW2, DnaJ homolog subfamily B member 12 (Fragment) OS=Homo sapiens OX=9606 GN=DNAJB12 PE=1 SV=1;tr|J3KPS0|J3KPS0_HUMAN Isoform of Q9NXW2, DnaJ (Hsp40) homolog, subfamily B, member 12, isoform CRA_c OS=Homo sapiens OX=96	4	2	2	2	0	2	0	0	0	2	0	0	0	2	0	0	5.4	5.4	5.4	31.12	276	276;409;375;377	0	3.7295	1.3944	1.4072	53.881	2	0	Median	NaN	1.3944	NaN	NaN	NaN	1.4072	NaN	NaN
DEK	Protein DEK	1.2214	1.3972	0.17093	NaN	B4DFG0;H0Y993;P35659-2;P35659;H0Y8X0;A0A494C028;D6RDA2;A0A494C198;D6R9L5	B4DFG0;H0Y993;P35659-2;P35659;H0Y8X0;A0A494C028;D6RDA2;A0A494C198	4;4;4;4;3;3;2;2;1	4;4;4;4;3;3;2;2;1	4;4;4;4;3;3;2;2;1	tr|B4DFG0|B4DFG0_HUMAN Isoform of P35659, Protein DEK OS=Homo sapiens OX=9606 GN=DEK PE=1 SV=1;tr|H0Y993|H0Y993_HUMAN Isoform of P35659, DEK oncogene (DNA binding), isoform CRA_b OS=Homo sapiens OX=9606 GN=DEK PE=1 SV=2;sp|P35659-2|DEK-2_HUMAN Isoform of P	9	4	4	4	1	1	4	0	1	1	4	0	1	1	4	0	19	19	19	39.5	347	347;380;341;375;285;380;122;303;162	0	20.003	0.62558	0.82625	142.64	8	2	Leave out requantified	1.3338	1.2723	0.12517	NaN	1.2214	1.3972	0.17093	NaN
CACNA1G	Voltage-dependent T-type calcium channel subunit alpha-1G	NaN	1.3891	NaN	NaN	A0A0B4J1X2;O43497-27;O43497-21;O43497-9;O43497-13;O43497-6;O43497-17;O43497-11;O43497-25;O43497-8;O43497-20;O43497-10;O43497-16;O43497-7;O43497-12;O43497-33;O43497-4;O43497-15;O43497-34;O43497-24;O43497-5;O43497-19;O43497-28;O43497-29;O43497-30;O43497-32;O43497-31;O43497-18;O43497-35;O43497-2;O43497-22;O43497-23;O43497-26;O43497-3;O43497-36;O43497	A0A0B4J1X2;O43497-27;O43497-21;O43497-9;O43497-13;O43497-6;O43497-17;O43497-11;O43497-25;O43497-8;O43497-20;O43497-10;O43497-16;O43497-7;O43497-12;O43497-33;O43497-4;O43497-15;O43497-34;O43497-24;O43497-5;O43497-19;O43497-28;O43497-29;O43497-30;O43497-32;O43497-31;O43497-18;O43497-35;O43497-2;O43497-22;O43497-23;O43497-26;O43497-3;O43497-36;O43497	1;1;1;1;1;1;1;1;1;1;1;1;1;1;1;1;1;1;1;1;1;1;1;1;1;1;1;1;1;1;1;1;1;1;1;1	1;1;1;1;1;1;1;1;1;1;1;1;1;1;1;1;1;1;1;1;1;1;1;1;1;1;1;1;1;1;1;1;1;1;1;1	1;1;1;1;1;1;1;1;1;1;1;1;1;1;1;1;1;1;1;1;1;1;1;1;1;1;1;1;1;1;1;1;1;1;1;1	tr|A0A0B4J1X2|A0A0B4J1X2_HUMAN Isoform of O43497, Voltage-dependent T-type calcium channel subunit alpha-1G OS=Homo sapiens OX=9606 GN=CACNA1G PE=1 SV=1;sp|O43497-27|CAC1G-27_HUMAN Isoform of O43497, Isoform 26 of Voltage-dependent T-type calcium channel s	36	1	1	1	0	1	0	0	0	1	0	0	0	1	0	0	1	1	1	171.38	1555	1555;1735;2291;2261;2266;2273;2277;2284;2287;2298;2366;2306;2314;2321;2332;2343;2354;2259;2257;2250;2171;2194;1746;1753;1758;1765;1776;2205;2248;2250;2227;2232;2239;2243;2246;2377	0.0096154	1.4738	1.3136	1.3891	NaN	1	0	Median	NaN	1.3136	NaN	NaN	NaN	1.3891	NaN	NaN
MRFAP1	MORF4 family-associated protein 1	0.94003	1.3682	NaN	NaN	A0A087WTY9;Q9Y605	A0A087WTY9;Q9Y605	1;1	1;1	1;1	tr|A0A087WTY9|A0A087WTY9_HUMAN Isoform of Q9Y605, MORF4 family-associated protein 1 OS=Homo sapiens OX=9606 GN=MRFAP1 PE=1 SV=1;sp|Q9Y605|MOFA1_HUMAN MORF4 family-associated protein 1 OS=Homo sapiens OX=9606 GN=MRFAP1 PE=1 SV=1	2	1	1	1	1	1	0	0	1	1	0	0	1	1	0	0	23.3	23.3	23.3	11.852	103	103;127	0	4.9742	1.2751	1.1341	26.538	2	0	Median	0.95164	1.7084	NaN	NaN	0.94003	1.3682	NaN	NaN
BLM	Bloom syndrome protein	0.9878	1.3678	0.86931	NaN	H0YNU5;A0A3B3IT82;P54132;H0YLV8	H0YNU5;A0A3B3IT82;P54132	9;9;9;3	9;9;9;3	9;9;9;3	tr|H0YNU5|H0YNU5_HUMAN Isoform of P54132, Bloom syndrome protein OS=Homo sapiens OX=9606 GN=BLM PE=1 SV=1;tr|A0A3B3IT82|A0A3B3IT82_HUMAN Isoform of P54132, Bloom syndrome protein OS=Homo sapiens OX=9606 GN=BLM PE=1 SV=1;sp|P54132|BLM_HUMAN Bloom syndrome p	4	9	9	9	3	5	4	0	3	5	4	0	3	5	4	0	9.1	9.1	9.1	144.47	1286	1286;1386;1417;413	0	10.981	0.71584	0.92868	50.412	12	2	Leave out requantified	1.0702	1.2789	0.5929	NaN	0.9878	1.3678	0.86931	NaN
ANKFY1	Rabankyrin-5	NaN	1.3584	NaN	NaN	Q9P2R3;Q9P2R3-2;Q9P2R3-4;K7EPT2	Q9P2R3;Q9P2R3-2;Q9P2R3-4;K7EPT2	2;2;2;1	2;2;2;1	2;2;2;1	sp|Q9P2R3|ANFY1_HUMAN Rabankyrin-5 OS=Homo sapiens OX=9606 GN=ANKFY1 PE=1 SV=2;sp|Q9P2R3-2|ANFY1-2_HUMAN Isoform of Q9P2R3, Isoform 2 of Rabankyrin-5 OS=Homo sapiens OX=9606 GN=ANKFY1 PE=1 SV=2;sp|Q9P2R3-4|ANFY1-4_HUMAN Isoform of Q9P2R3, Isoform 4 of Raba	4	2	2	2	1	2	0	0	1	2	0	0	1	2	0	0	2.7	2.7	2.7	128.4	1169	1169;1170;1211;80	0.00084424	2.754	1.2687	1.3584	NaN	1	0	Median	NaN	1.2687	NaN	NaN	NaN	1.3584	NaN	NaN
HLA-A;HLA-C	HLA class I histocompatibility antigen, A-36 alpha chain;HLA class I histocompatibility antigen, A-1 alpha chain;HLA class I histocompatibility antigen, A-24 alpha chain;HLA class I histocompatibility antigen, Cw-2 alpha chain;HLA class I histocompatibility antigen, A-23 alpha chain;HLA class I histocompatibility antigen, A-11 alpha chain;HLA class I histocompatibility antigen, A-3 alpha chain;HL…	NaN	1.3336	NaN	NaN	A0A0G2JL56;A0A0G2JI36;A0A1W2PQD0;P30455;P30443;A0A1W2PSE7;A0A0G2JIF2;A0A1W2PP77;A0A1W2PRX1;A0A1W2PS56;P05534;P30501;A0A1W2PS24;P30447;Q5SRN7;P13746;P04439;Q5SRN5;P16188;P13746-2;B0UXQ0;A0A140T9Z6;A0A140T941;A0A1W2PS39;Q09160;A0A140T8W8;A0A1W2PR61;A0A1W2PQS8;Q9GJ45;P30456;P18462;A0A140T8Y4;A0A140T975;A0A0G2JPD3;P30450;A0A1W2PPF8;P16190;P10314;P30453;P01891;P16189;P30459;P30457;P30512;A0A140T8X0;A0…	A0A0G2JL56;A0A0G2JI36;A0A1W2PQD0;P30455;P30443;A0A1W2PSE7;A0A0G2JIF2;A0A1W2PP77;A0A1W2PRX1;A0A1W2PS56;P05534;P30501;A0A1W2PS24;P30447;Q5SRN7;P13746;P04439;Q5SRN5;P16188;P13746-2;B0UXQ0;A0A140T9Z6;A0A140T941;A0A1W2PS39;Q09160;A0A140T8W8;A0A1W2PR61;A0A1W2PQS8;Q9GJ45;P30456;P18462;A0A140T8Y4;A0A140T975;A0A0G2JPD3;P30450;A0A1W2PPF8;P16190;P10314;P30453;P01891;P16189;P30459;P30457;P30512	6;6;6;6;6;6;6;4;4;4;4;4;4;4;4;4;4;4;4;4;3;3;3;3;3;3;3;3;3;3;3;3;3;3;3;3;3;3;3;3;3;3;3;3;2;2;2;2;2;2;2;2;2;2;2;2;2;2;2;2;2;2;2;2;2;2;2;2;2;2;2;2;2;2;2;2;2;2;2;2;2;2;2;2;2;2;2;2;2;1;1;1	2;2;2;2;2;2;2;0;0;0;0;0;0;0;0;0;0;0;0;0;0;0;0;0;0;0;0;0;0;0;0;0;0;0;0;0;0;0;0;0;0;0;0;0;0;0;0;0;0;0;0;0;0;0;0;0;0;0;0;0;0;0;0;0;0;0;0;0;0;0;0;0;0;0;0;0;0;0;0;0;0;0;0;0;0;0;0;0;0;0;0;0	2;2;2;2;2;2;2;0;0;0;0;0;0;0;0;0;0;0;0;0;0;0;0;0;0;0;0;0;0;0;0;0;0;0;0;0;0;0;0;0;0;0;0;0;0;0;0;0;0;0;0;0;0;0;0;0;0;0;0;0;0;0;0;0;0;0;0;0;0;0;0;0;0;0;0;0;0;0;0;0;0;0;0;0;0;0;0;0;0;0;0;0	tr|A0A0G2JL56|A0A0G2JL56_HUMAN Isoform of P01891, HLA class I histocompatibility antigen, A-3 alpha chain OS=Homo sapiens OX=9606 GN=HLA-A PE=1 SV=1;tr|A0A0G2JI36|A0A0G2JI36_HUMAN Isoform of P01891, HLA class I histocompatibility antigen, A-3 alpha chain O	92	6	2	2	1	6	2	1	0	2	0	0	0	2	0	0	14.5	5.1	5.1	44.256	394	394;299;339;365;365;367;371;244;244;244;365;366;325;365;299;365;365;371;365;371;365;342;299;339;365;299;325;325;326;365;365;371;299;394;365;339;365;365;365;365;365;365;365;365;334;241;241;241;244;334;241;225;225;225;225;442;442;246;225;241;246;362;346;362;246;362;362;227;366;346;362;362;362;362;362;213;362;362;362;362;362;362;362;362;362;362;362;362;362;346;442;143	0.006679	1.7106	1.3323	1.3336	21.329	2	0	Median	NaN	1.3323	NaN	NaN	NaN	1.3336	NaN	NaN
MIA3	Melanoma inhibitory activity protein 3	0.8755	1.3324	1.0174	NaN	Q5JRA6-2;Q5JRA6;A0A0A0MRH6;Q5JRA6-4;Q5JRA6-3	Q5JRA6-2;Q5JRA6;A0A0A0MRH6	7;7;5;3;1	7;7;5;3;1	7;7;5;3;1	sp|Q5JRA6-2|TGO1-2_HUMAN Isoform of Q5JRA6, Isoform 2 of Transport and Golgi organization protein 1 homolog OS=Homo sapiens OX=9606 GN=MIA3 PE=1 SV=1;sp|Q5JRA6|TGO1_HUMAN Transport and Golgi organization protein 1 homolog OS=Homo sapiens OX=9606 GN=MIA3 PE	5	7	7	7	6	1	5	0	6	1	5	0	6	1	5	0	4.8	4.8	4.8	206.89	1848	1848;1907;1015;785;500	0	11.922	0.76032	0.97139	13.206	12	0	Leave out requantified	0.92041	1.1898	0.64998	NaN	0.8755	1.3324	1.0174	NaN
DPYSL3	Dihydropyrimidinase-related protein 3	NaN	1.3292	NaN	NaN	Q14195-2;Q14195	Q14195-2;Q14195	3;2	2;1	2;1	sp|Q14195-2|DPYL3-2_HUMAN Isoform of Q14195, Isoform LCRMP-4 of Dihydropyrimidinase-related protein 3 OS=Homo sapiens OX=9606 GN=DPYSL3 PE=1 SV=1;sp|Q14195|DPYL3_HUMAN Dihydropyrimidinase-related protein 3 OS=Homo sapiens OX=9606 GN=DPYSL3 PE=1 SV=1	2	3	2	2	0	1	1	1	0	1	1	0	0	1	1	0	7.5	5.1	5.1	73.91	684	684;570	0	4.7289	1.2951	1.3292	NaN	1	0	Median	NaN	1.2951	NaN	NaN	NaN	1.3292	NaN	NaN
FRMD5	FERM domain-containing protein 5	NaN	1.3222	NaN	NaN	H0YNI9;H0YKW6;H0Y5N1;B5MC67;Q7Z6J6-2;Q7Z6J6	H0YNI9;H0YKW6;H0Y5N1;B5MC67;Q7Z6J6-2;Q7Z6J6	1;1;1;1;1;1	1;1;1;1;1;1	1;1;1;1;1;1	tr|H0YNI9|H0YNI9_HUMAN Isoform of Q7Z6J6, FERM domain-containing protein 5 (Fragment) OS=Homo sapiens OX=9606 GN=FRMD5 PE=1 SV=2;tr|H0YKW6|H0YKW6_HUMAN Isoform of Q7Z6J6, FERM domain containing 5, isoform CRA_b OS=Homo sapiens OX=9606 GN=FRMD5 PE=1 SV=1;tr	6	1	1	1	0	1	0	0	0	1	0	0	0	1	0	0	9.6	9.6	9.6	20.198	178	178;414;474;517;555;570	0	19.252	1.1784	1.3222	NaN	1	0	Median	NaN	1.1784	NaN	NaN	NaN	1.3222	NaN	NaN
TOR4A	Torsin-4A	0.9781	1.2843	NaN	NaN	Q9NXH8	Q9NXH8	2	2	2	sp|Q9NXH8|TOR4A_HUMAN Torsin-4A OS=Homo sapiens OX=9606 GN=TOR4A PE=1 SV=2	1	2	2	2	1	1	0	0	1	1	0	0	1	1	0	0	5.2	5.2	5.2	46.914	423	423	0	4.6733	1.1221	1.1208	19.258	2	1	Median	1.0201	1.2343	NaN	NaN	0.9781	1.2843	NaN	NaN
IFNA5	Interferon alpha-5	NaN	1.2723	NaN	NaN	P01569	P01569	1	1	1	sp|P01569|IFNA5_HUMAN Interferon alpha-5 OS=Homo sapiens OX=9606 GN=IFNA5 PE=1 SV=1	1	1	1	1	0	1	0	0	0	1	0	0	0	1	0	0	5.3	5.3	5.3	21.942	189	189	0.0092824	1.4904	1.2112	1.2723	NaN	1	0	Median	NaN	1.2112	NaN	NaN	NaN	1.2723	NaN	NaN
POLD1	DNA polymerase;DNA polymerase delta catalytic subunit	NaN	1.2671	0.93354	NaN	M0QZR8;M0R2B7;P28340;A0A2R8Y705;M0QXE6;M0QXQ2;A0A2R8Y7K6	M0QZR8;M0R2B7;P28340;A0A2R8Y705;M0QXE6;M0QXQ2;A0A2R8Y7K6	4;4;4;3;2;2;2	4;4;4;3;2;2;2	4;4;4;3;2;2;2	tr|M0QZR8|M0QZR8_HUMAN Isoform of P28340, DNA polymerase OS=Homo sapiens OX=9606 GN=POLD1 PE=1 SV=1;tr|M0R2B7|M0R2B7_HUMAN Isoform of P28340, DNA polymerase OS=Homo sapiens OX=9606 GN=POLD1 PE=1 SV=1;sp|P28340|DPOD1_HUMAN DNA polymerase delta catalytic sub	7	4	4	4	0	2	3	0	0	2	3	0	0	2	3	0	4.5	4.5	4.5	111.68	1009	1009;1133;1107;447;289;291;762	0.00044405	3.3698	0.87632	1.1281	14.17	4	0	Leave out requantified	NaN	1.192	0.65376	NaN	NaN	1.2671	0.93354	NaN
PPFIA1	Liprin-alpha-1	0.8859	1.2667	0.93017	NaN	E9PID5;E9PPF6;E9PJZ7;A0A2R8Y7R9;Q13136-2;Q13136	E9PID5;E9PPF6;E9PJZ7;A0A2R8Y7R9;Q13136-2;Q13136	1;1;1;1;1;1	1;1;1;1;1;1	1;1;1;1;1;1	tr|E9PID5|E9PID5_HUMAN Isoform of Q13136, Liprin-alpha-1 (Fragment) OS=Homo sapiens OX=9606 GN=PPFIA1 PE=1 SV=1;tr|E9PPF6|E9PPF6_HUMAN Isoform of Q13136, Liprin-alpha-1 (Fragment) OS=Homo sapiens OX=9606 GN=PPFIA1 PE=1 SV=1;tr|E9PJZ7|E9PJZ7_HUMAN Isoform o	6	1	1	1	1	1	1	0	1	1	1	0	1	1	1	0	15.2	15.2	15.2	10.785	99	99;158;583;1224;1185;1202	0	4.9433	0.97003	1.0855	19.39	3	0	Plateau	0.97003	1.1837	0.69293	NaN	0.8859	1.2667	0.93017	NaN
GIT1	ARF GTPase-activating protein GIT1	NaN	1.2472	NaN	NaN	J3QLH1;J3QRU8;A0A0C4DGN6;Q9Y2X7;Q9Y2X7-3	J3QLH1;J3QRU8;A0A0C4DGN6;Q9Y2X7;Q9Y2X7-3	1;1;1;1;1	1;1;1;1;1	1;1;1;1;1	tr|J3QLH1|J3QLH1_HUMAN Isoform of Q9Y2X7, ARF GTPase-activating protein GIT1 (Fragment) OS=Homo sapiens OX=9606 GN=GIT1 PE=1 SV=8;tr|J3QRU8|J3QRU8_HUMAN Isoform of Q9Y2X7, ARF GTPase-activating protein GIT1 OS=Homo sapiens OX=9606 GN=GIT1 PE=1 SV=1;tr|A0A0	5	1	1	1	0	1	0	0	0	1	0	0	0	1	0	0	7	7	7	25.736	228	228;694;747;761;770	0.0019747	2.2006	1.1712	1.2472	NaN	1	0	Median	NaN	1.1712	NaN	NaN	NaN	1.2472	NaN	NaN
FBXO28	F-box only protein 28	NaN	1.2455	NaN	NaN	Q9NVF7	Q9NVF7	1	1	1	sp|Q9NVF7|FBX28_HUMAN F-box only protein 28 OS=Homo sapiens OX=9606 GN=FBXO28 PE=1 SV=1	1	1	1	1	0	1	0	0	0	1	0	0	0	1	0	0	3.8	3.8	3.8	41.149	368	368	0.00082645	2.5407	1.186	1.2455	NaN	1	0	Median	NaN	1.186	NaN	NaN	NaN	1.2455	NaN	NaN
NUP214	Nuclear pore complex protein Nup214	2.1009	1.2383	0.95062	NaN	A0A0A0MSW3;A0A494C1F2;P35658-2;P35658-4;P35658;P35658-3;P35658-5;E9PKD2;A0A494BZU9;B7ZAV2;H0Y837	A0A0A0MSW3;A0A494C1F2;P35658-2;P35658-4;P35658;P35658-3;P35658-5	3;3;3;3;3;3;3;1;1;1;1	3;3;3;3;3;3;3;1;1;1;1	3;3;3;3;3;3;3;1;1;1;1	tr|A0A0A0MSW3|A0A0A0MSW3_HUMAN Isoform of P35658, Nuclear pore complex protein Nup214 OS=Homo sapiens OX=9606 GN=NUP214 PE=1 SV=1;tr|A0A494C1F2|A0A494C1F2_HUMAN Isoform of P35658, Nuclear pore complex protein Nup214 OS=Homo sapiens OX=9606 GN=NUP214 PE=4 S	11	3	3	3	3	2	1	1	3	2	1	1	3	2	1	1	2.8	2.8	2.8	152.57	1519	1519;2078;2079;2080;2090;2091;2093;495;720;916;967	0	5.0344	1.1007	1.2383	32.919	6	2	Leave out requantified	2.1201	1.1007	0.6201	NaN	2.1009	1.2383	0.95062	NaN
KIF2A	Kinesin-like protein KIF2A	NaN	1.2264	0.42127	NaN	O00139-2;O00139-1;O00139-5;O00139;O00139-4	O00139-2;O00139-1;O00139-5;O00139;O00139-4	1;1;1;1;1	1;1;1;1;1	1;1;1;1;1	sp|O00139-2|KIF2A-2_HUMAN Isoform of O00139, Isoform 2 of Kinesin-like protein KIF2A OS=Homo sapiens OX=9606 GN=KIF2A PE=1 SV=3;sp|O00139-1|KIF2A-1_HUMAN Isoform of O00139, Isoform 1 of Kinesin-like protein KIF2A OS=Homo sapiens OX=9606 GN=KIF2A PE=1 SV=3;	5	1	1	1	0	1	1	0	0	1	1	0	0	1	1	0	1.7	1.7	1.7	75.042	660	660;679;686;706;744	0.0095881	1.4511	0.58831	0.71878	75.559	2	0	Median	NaN	1.1626	0.2977	NaN	NaN	1.2264	0.42127	NaN
EIF2A	Eukaryotic translation initiation factor 2A;Eukaryotic translation initiation factor 2A, N-terminally processed	1.142	1.2262	NaN	NaN	F8WAE5;Q9BY44-3;Q9BY44;C9IZE1;Q9BY44-4;H7C5Q3;H7C5R5;Q9BY44-2	F8WAE5;Q9BY44-3;Q9BY44;C9IZE1;Q9BY44-4	3;3;3;2;2;1;1;1	3;3;3;2;2;1;1;1	3;3;3;2;2;1;1;1	tr|F8WAE5|F8WAE5_HUMAN Isoform of Q9BY44, Eukaryotic translation initiation factor 2A OS=Homo sapiens OX=9606 GN=EIF2A PE=1 SV=1;sp|Q9BY44-3|EIF2A-3_HUMAN Isoform of Q9BY44, Isoform 3 of Eukaryotic translation initiation factor 2A OS=Homo sapiens OX=9606 G	8	3	3	3	2	2	0	0	2	2	0	0	2	2	0	0	7.9	7.9	7.9	64.449	580	580;560;585;236;524;158;316;371	0	7.2192	1.2864	1.1607	21.301	4	1	Leave out requantified	1.2707	1.1728	NaN	NaN	1.142	1.2262	NaN	NaN
PRR11	Proline-rich protein 11	NaN	1.22	NaN	NaN	Q96HE9;J3QR53;J3QKY4	Q96HE9;J3QR53	3;2;1	3;2;1	3;2;1	sp|Q96HE9|PRR11_HUMAN Proline-rich protein 11 OS=Homo sapiens OX=9606 GN=PRR11 PE=1 SV=1;tr|J3QR53|J3QR53_HUMAN Isoform of Q96HE9, Proline-rich protein 11 (Fragment) OS=Homo sapiens OX=9606 GN=PRR11 PE=1 SV=1	3	3	3	3	0	3	0	0	0	3	0	0	0	3	0	0	12.5	12.5	12.5	40.085	360	360;199;144	0	37.155	1.2017	1.22	16.24	2	0	Median	NaN	1.2017	NaN	NaN	NaN	1.22	NaN	NaN
PSMC3	26S protease regulatory subunit 6A	0.79864	1.2143	0.79512	NaN	P17980;E9PM69;E9PKD5;E9PMD8;E9PLG2	P17980;E9PM69;E9PKD5;E9PMD8	20;19;12;11;5	1;1;0;0;0	1;1;0;0;0	sp|P17980|PRS6A_HUMAN 26S proteasome regulatory subunit 6A OS=Homo sapiens OX=9606 GN=PSMC3 PE=1 SV=3;tr|E9PM69|E9PM69_HUMAN Isoform of P17980, 26S proteasome regulatory subunit 6A OS=Homo sapiens OX=9606 GN=PSMC3 PE=1 SV=1;tr|E9PKD5|E9PKD5_HUMAN Isoform o	5	20	1	1	12	12	16	11	1	1	1	0	1	1	1	0	59	3	3	49.203	439	439;397;311;301;184	0.0019984	2.3043	0.74229	0.83477	22.421	4	0	Median	0.8468	1.0659	0.61826	NaN	0.79864	1.2143	0.79512	NaN
RAB3GAP2	Rab3 GTPase-activating protein non-catalytic subunit	0.60827	1.2125	0.72551	NaN	Q9H2M9	Q9H2M9	2	2	2	sp|Q9H2M9|RBGPR_HUMAN Rab3 GTPase-activating protein non-catalytic subunit OS=Homo sapiens OX=9606 GN=RAB3GAP2 PE=1 SV=1	1	2	2	2	2	1	1	0	2	1	1	0	2	1	1	0	1.7	1.7	1.7	155.98	1393	1393	0	4.9953	0.69424	0.75531	13.958	4	0	Leave out requantified	0.66422	1.1333	0.4646	NaN	0.60827	1.2125	0.72551	NaN
FAM208A	Protein FAM208A	NaN	1.2094	0.77479	NaN	Q9UK61-3;Q9UK61-4;Q9UK61;A0A087X0F1;Q9UK61-2	Q9UK61-3;Q9UK61-4;Q9UK61;A0A087X0F1;Q9UK61-2	2;2;2;1;1	2;2;2;1;1	2;2;2;1;1	sp|Q9UK61-3|TASOR-3_HUMAN Isoform of Q9UK61, Isoform 3 of Protein TASOR OS=Homo sapiens OX=9606 GN=TASOR PE=1 SV=3;sp|Q9UK61-4|TASOR-4_HUMAN Isoform of Q9UK61, Isoform 4 of Protein TASOR OS=Homo sapiens OX=9606 GN=TASOR PE=1 SV=3;sp|Q9UK61|TASOR_HUMAN Prot	5	2	2	2	1	1	1	1	1	1	1	1	1	1	1	1	2.7	2.7	2.7	170.81	1512	1512;1609;1670;1035;1233	0	152.01	0.74726	0.96799	31.484	2	1	Median	NaN	1.125	0.49635	NaN	NaN	1.2094	0.77479	NaN
CAMK2G;CAMK2B;CAMK2A	Calcium/calmodulin-dependent protein kinase type II subunit gamma;Calcium/calmodulin-dependent protein kinase type II subunit beta;Calcium/calmodulin-dependent protein kinase type II subunit alpha	NaN	1.2023	NaN	NaN	Q13555-9;Q5SWX3;A0A2Q3DQE3;Q13555-6;Q13555;Q13555-10;Q13555-4;Q13555-8;Q13555-3;Q13555-5;Q13555-2;Q13555-7;Q13555-11;Q13554;Q8WU40;Q13554-2;H7BXS4;Q13554-8;Q13554-5;Q13554-3;Q13554-6;Q9UQM7-2;Q13554-4;Q9UQM7;Q13554-7;E7EQE4;H0Y9C2;H0Y6G2;E9PBE8;D6RHX9	Q13555-9;Q5SWX3;A0A2Q3DQE3;Q13555-6;Q13555;Q13555-10;Q13555-4;Q13555-8;Q13555-3;Q13555-5;Q13555-2;Q13555-7;Q13555-11;Q13554;Q8WU40;Q13554-2;H7BXS4;Q13554-8;Q13554-5;Q13554-3;Q13554-6;Q9UQM7-2;Q13554-4;Q9UQM7;Q13554-7	3;3;3;3;3;3;3;3;3;3;3;3;3;2;2;2;2;2;2;2;2;2;2;2;2;1;1;1;1;1	1;1;1;1;1;1;1;1;1;1;1;1;1;0;0;0;0;0;0;0;0;0;0;0;0;0;0;0;0;0	1;1;1;1;1;1;1;1;1;1;1;1;1;0;0;0;0;0;0;0;0;0;0;0;0;0;0;0;0;0	sp|Q13555-9|KCC2G-9_HUMAN Isoform of Q13555, Isoform 9 of Calcium/calmodulin-dependent protein kinase type II subunit gamma OS=Homo sapiens OX=9606 GN=CAMK2G PE=1 SV=4;tr|Q5SWX3|Q5SWX3_HUMAN Isoform of Q13555, Calcium/calmodulin-dependent protein kinase (C	30	3	1	1	1	3	1	1	0	1	0	0	0	1	0	0	8.1	2.4	2.4	60.728	542	542;516;556;588;558;495;529;556;524;527;547;533;539;666;453;542;362;517;518;503;492;489;479;478;449;173;194;335;168;24	0.0008261	2.539	1.1557	1.2023	NaN	1	0	Median	NaN	1.1557	NaN	NaN	NaN	1.2023	NaN	NaN
TULP3	Tubby-related protein 3	NaN	1.1992	NaN	NaN	H0YFU8;H0YG12;F5H7B9;O75386;O75386-2	H0YFU8;H0YG12;F5H7B9;O75386;O75386-2	1;1;1;1;1	1;1;1;1;1	1;1;1;1;1	tr|H0YFU8|H0YFU8_HUMAN Isoform of O75386, Tubby-related protein 3 (Fragment) OS=Homo sapiens OX=9606 GN=TULP3 PE=1 SV=1;tr|H0YG12|H0YG12_HUMAN Isoform of O75386, Tubby-related protein 3 (Fragment) OS=Homo sapiens OX=9606 GN=TULP3 PE=1 SV=1;tr|F5H7B9|F5H7B9	5	1	1	1	0	1	0	0	0	1	0	0	0	1	0	0	11	11	11	12.447	109	109;133;137;442;501	1	-2	1.2631	1.1992	NaN	1	0	Median	NaN	1.2631	NaN	NaN	NaN	1.1992	NaN	NaN
KIF20B	Kinesin-like protein KIF20B;Kinesin-like protein	1.242	1.182	NaN	NaN	Q96Q89-4;Q96Q89-3;Q96Q89;Q96Q89-2;A0A0A0MSJ5	Q96Q89-4;Q96Q89-3;Q96Q89;Q96Q89-2;A0A0A0MSJ5	2;2;2;2;1	2;2;2;2;1	2;2;2;2;1	sp|Q96Q89-4|KI20B-4_HUMAN Isoform of Q96Q89, Isoform 4 of Kinesin-like protein KIF20B OS=Homo sapiens OX=9606 GN=KIF20B PE=1 SV=3;sp|Q96Q89-3|KI20B-3_HUMAN Isoform of Q96Q89, Isoform 3 of Kinesin-like protein KIF20B OS=Homo sapiens OX=9606 GN=KIF20B PE=1 S	5	2	2	2	2	1	0	0	2	1	0	0	2	1	0	0	1.5	1.5	1.5	199.81	1722	1722;1780;1820;1853;206	0.0008414	2.7243	1.2214	1.1961	4.73	3	0	Median	1.2899	1.0679	NaN	NaN	1.242	1.182	NaN	NaN
GNRH1	Progonadoliberin-1;Gonadoliberin-1;GnRH-associated peptide 1	0.79841	1.1726	NaN	NaN	P01148	P01148	1	1	1	sp|P01148|GON1_HUMAN Progonadoliberin-1 OS=Homo sapiens OX=9606 GN=GNRH1 PE=1 SV=1	1	1	1	1	1	1	0	0	1	1	0	0	1	1	0	0	16.3	16.3	16.3	10.38	92	92	0.00081967	2.4694	0.98509	0.96757	27.175	2	0	Median	0.80951	1.1987	NaN	NaN	0.79841	1.1726	NaN	NaN
ATP2B4	Plasma membrane calcium-transporting ATPase 4	NaN	1.1658	NaN	NaN	P23634-5;P23634-4;P23634-3;P23634-2;P23634-7;P23634-6;P23634-8;P23634;P20020-5;P20020-2;P20020-6;P20020;P20020-4;P20020-1	P23634-5;P23634-4;P23634-3;P23634-2;P23634-7;P23634-6;P23634-8;P23634	3;3;3;3;3;3;3;3;1;1;1;1;1;1	3;3;3;3;3;3;3;3;1;1;1;1;1;1	3;3;3;3;3;3;3;3;1;1;1;1;1;1	sp|P23634-5|AT2B4-5_HUMAN Isoform of P23634, Isoform ZK of Plasma membrane calcium-transporting ATPase 4 OS=Homo sapiens OX=9606 GN=ATP2B4 PE=1 SV=2;sp|P23634-4|AT2B4-4_HUMAN Isoform of P23634, Isoform XK of Plasma membrane calcium-transporting ATPase 4 OS	14	3	3	3	1	2	0	0	1	2	0	0	1	2	0	0	4.3	4.3	4.3	124.01	1122	1122;1134;1158;1170;1193;1205;1229;1241;1171;1176;1184;1220;1249;1258	0	5.4109	1.2545	1.1658	NaN	1	0	Median	NaN	1.2545	NaN	NaN	NaN	1.1658	NaN	NaN
WDR75	WD repeat-containing protein 75	NaN	1.1555	NaN	NaN	Q8IWA0	Q8IWA0	1	1	1	sp|Q8IWA0|WDR75_HUMAN WD repeat-containing protein 75 OS=Homo sapiens OX=9606 GN=WDR75 PE=1 SV=1	1	1	1	1	0	1	0	0	0	1	0	0	0	1	0	0	2.3	2.3	2.3	94.498	830	830	0.0092957	1.4924	1.0244	1.1555	NaN	1	0	Median	NaN	1.0244	NaN	NaN	NaN	1.1555	NaN	NaN
ARMC6	Armadillo repeat-containing protein 6	0.95731	1.1515	0.94698	NaN	F5H2X2;F5H2K4;F5GWV0;F5H4P3;Q6NXE6-2;Q6NXE6;F5H7V0;F5GZP0;F5H3X1;F5H052;F5H6J3;B4E1N1	F5H2X2;F5H2K4;F5GWV0;F5H4P3;Q6NXE6-2;Q6NXE6;F5H7V0;F5GZP0;F5H3X1;F5H052;F5H6J3;B4E1N1	2;2;2;2;2;2;1;1;1;1;1;1	2;2;2;2;2;2;1;1;1;1;1;1	2;2;2;2;2;2;1;1;1;1;1;1	tr|F5H2X2|F5H2X2_HUMAN Isoform of Q6NXE6, Armadillo repeat-containing protein 6 (Fragment) OS=Homo sapiens OX=9606 GN=ARMC6 PE=1 SV=1;tr|F5H2K4|F5H2K4_HUMAN Isoform of Q6NXE6, Armadillo repeat-containing protein 6 (Fragment) OS=Homo sapiens OX=9606 GN=ARMC	12	2	2	2	1	1	1	0	1	1	1	0	1	1	1	0	13.7	13.7	13.7	17.475	161	161;163;256;259;476;501;30;43;70;103;156;408	0.0023493	2.1327	1.0423	0.95731	10.99	3	0	Median	1.0423	1.1014	0.65773	NaN	0.95731	1.1515	0.94698	NaN
PUSL1	tRNA pseudouridine synthase-like 1	NaN	1.1474	0.7735	NaN	Q8N0Z8;J3KTG4;Q8N0Z8-2	Q8N0Z8	3;1;1	3;1;1	3;1;1	sp|Q8N0Z8|PUSL1_HUMAN tRNA pseudouridine synthase-like 1 OS=Homo sapiens OX=9606 GN=PUSL1 PE=1 SV=1	3	3	3	3	0	2	1	0	0	2	1	0	0	2	1	0	13.5	13.5	13.5	33.232	303	303;125;142	0	4.5727	1.1942	1.0935	23.271	3	2	Median	NaN	1.2687	0.50468	NaN	NaN	1.1474	0.7735	NaN
ORC3	Origin recognition complex subunit 3	1.4806	1.1385	NaN	NaN	Q9UBD5-3;Q9UBD5;Q9UBD5-2	Q9UBD5-3;Q9UBD5;Q9UBD5-2	1;1;1	1;1;1	1;1;1	sp|Q9UBD5-3|ORC3-3_HUMAN Isoform of Q9UBD5, Isoform 3 of Origin recognition complex subunit 3 OS=Homo sapiens OX=9606 GN=ORC3 PE=1 SV=1;sp|Q9UBD5|ORC3_HUMAN Origin recognition complex subunit 3 OS=Homo sapiens OX=9606 GN=ORC3 PE=1 SV=1;sp|Q9UBD5-2|ORC3-2_H	3	1	1	1	1	1	0	1	1	1	0	1	1	1	0	1	2.6	2.6	2.6	65.928	568	568;711;712	0.00083438	2.6261	1.34	1.2983	18.578	2	0	Median	1.5549	1.1549	NaN	NaN	1.4806	1.1385	NaN	NaN
FAM179A	Protein FAM179A	NaN	1.1381	0.85248	NaN	Q6ZUX3;Q6ZUX3-2	Q6ZUX3;Q6ZUX3-2	2;1	2;1	2;1	sp|Q6ZUX3|TGRM2_HUMAN TOG array regulator of axonemal microtubules protein 2 OS=Homo sapiens OX=9606 GN=TOGARAM2 PE=2 SV=2;sp|Q6ZUX3-2|TGRM2-2_HUMAN Isoform of Q6ZUX3, Isoform 2 of TOG array regulator of axonemal microtubules protein 2 OS=Homo sapiens OX=9	2	2	2	2	0	1	1	0	0	1	1	0	0	1	1	0	2	2	2	111.15	1019	1019;546	0.0073394	1.6351	0.79166	0.98497	20.43	2	0	Median	NaN	1.1496	0.54518	NaN	NaN	1.1381	0.85248	NaN
LMOD3	Leiomodin-3	NaN	1.1271	NaN	NaN	Q0VAK6-2;Q0VAK6	Q0VAK6-2;Q0VAK6	1;1	1;1	1;1	sp|Q0VAK6-2|LMOD3-2_HUMAN Isoform of Q0VAK6, Isoform 2 of Leiomodin-3 OS=Homo sapiens OX=9606 GN=LMOD3 PE=1 SV=1;sp|Q0VAK6|LMOD3_HUMAN Leiomodin-3 OS=Homo sapiens OX=9606 GN=LMOD3 PE=1 SV=1	2	1	1	1	0	1	0	0	0	1	0	0	0	1	0	0	3.2	3.2	3.2	40.194	348	348;560	0.0072595	1.5817	1.2006	1.1271	NaN	1	0	Median	NaN	1.2006	NaN	NaN	NaN	1.1271	NaN	NaN
KPNA4	Importin subunit alpha-3	1.2599	1.1206	NaN	NaN	O00629;H7C4F6	O00629	4;1	2;1	2;1	sp|O00629|IMA3_HUMAN Importin subunit alpha-3 OS=Homo sapiens OX=9606 GN=KPNA4 PE=1 SV=1	2	4	2	2	2	3	2	2	2	1	0	0	2	1	0	0	8.3	5.2	5.2	57.886	521	521;170	0.00083333	2.6009	1.3018	1.1814	9.3371	3	0	Median	1.3723	1.045	NaN	NaN	1.2599	1.1206	NaN	NaN
PPIL4	Peptidyl-prolyl cis-trans isomerase-like 4	1.4142	1.12	NaN	NaN	Q8WUA2	Q8WUA2	2	2	2	sp|Q8WUA2|PPIL4_HUMAN Peptidyl-prolyl cis-trans isomerase-like 4 OS=Homo sapiens OX=9606 GN=PPIL4 PE=1 SV=1	1	2	2	2	1	1	0	0	1	1	0	0	1	1	0	0	5.1	5.1	5.1	57.224	492	492	0.00084926	2.8274	1.3521	1.2585	16.491	2	0	Median	1.5778	1.1587	NaN	NaN	1.4142	1.12	NaN	NaN
DNM2	Dynamin-2	1.2145	1.1135	0.90269	NaN	P50570-3;P50570-2;P50570-5;P50570-4;P50570;K7EMQ3	P50570-3;P50570-2;P50570-5;P50570-4;P50570	4;4;4;4;4;1	4;4;4;4;4;1	4;4;4;4;4;1	sp|P50570-3|DYN2-3_HUMAN Isoform of P50570, Isoform 3 of Dynamin-2 OS=Homo sapiens OX=9606 GN=DNM2 PE=1 SV=2;sp|P50570-2|DYN2-2_HUMAN Isoform of P50570, Isoform 2 of Dynamin-2 OS=Homo sapiens OX=9606 GN=DNM2 PE=1 SV=2;sp|P50570-5|DYN2-5_HUMAN Isoform of P5	6	4	4	4	2	3	3	1	2	3	3	1	2	3	3	1	6.4	6.4	6.4	97.553	866	866;866;869;870;870;289	0	12.774	0.99354	1.1629	38.602	4	2	Median	1.3231	1.0821	0.71886	NaN	1.2145	1.1135	0.90269	NaN
ALDH1A3	Aldehyde dehydrogenase family 1 member A3	0.71415	1.1114	0.84775	NaN	H0Y2X5;P47895;H0YNQ3;H0YKF9	H0Y2X5;P47895	9;9;3;2	9;9;3;2	9;9;3;2	tr|H0Y2X5|H0Y2X5_HUMAN Isoform of P47895, Aldehyde dehydrogenase 1 family, member A3, isoform CRA_b OS=Homo sapiens OX=9606 GN=ALDH1A3 PE=1 SV=1;sp|P47895|AL1A3_HUMAN Aldehyde dehydrogenase family 1 member A3 OS=Homo sapiens OX=9606 GN=ALDH1A3 PE=1 SV=2	4	9	9	9	3	5	7	0	3	5	7	0	3	5	7	0	23.7	23.7	23.7	44.256	405	405;512;141;144	0	17.086	0.75045	0.84775	19.559	17	1	Leave out requantified	0.78692	1.0272	0.5912	NaN	0.71415	1.1114	0.84775	NaN
WDR81	WD repeat-containing protein 81	NaN	1.1101	0.84349	NaN	A0A0J9YXM6;Q562E7-4;Q562E7	A0A0J9YXM6;Q562E7-4;Q562E7	2;2;2	2;2;2	2;2;2	tr|A0A0J9YXM6|A0A0J9YXM6_HUMAN Isoform of Q562E7, WD repeat-containing protein 81 OS=Homo sapiens OX=9606 GN=WDR81 PE=1 SV=1;sp|Q562E7-4|WDR81-4_HUMAN Isoform of Q562E7, Isoform 4 of WD repeat-containing protein 81 OS=Homo sapiens OX=9606 GN=WDR81 PE=1 SV=	3	2	2	2	0	1	1	0	0	1	1	0	0	1	1	0	1.2	1.2	1.2	211.57	1940	1940;1811;1941	0.0004268	2.8923	0.82432	0.96768	19.424	2	0	Median	NaN	1.0062	0.6753	NaN	NaN	1.1101	0.84349	NaN
BAP1	Ubiquitin carboxyl-terminal hydrolase BAP1	NaN	1.1093	NaN	NaN	Q92560	Q92560	1	1	1	sp|Q92560|BAP1_HUMAN Ubiquitin carboxyl-terminal hydrolase BAP1 OS=Homo sapiens OX=9606 GN=BAP1 PE=1 SV=2	1	1	1	1	0	1	0	0	0	1	0	0	0	1	0	0	1.9	1.9	1.9	80.361	729	729	0.0019724	2.1932	1.0309	1.1093	NaN	1	0	Median	NaN	1.0309	NaN	NaN	NaN	1.1093	NaN	NaN
RACGAP1	Rac GTPase-activating protein 1	0.95695	1.0963	NaN	NaN	Q9H0H5;F8W1E5;F8VRD2	Q9H0H5;F8W1E5;F8VRD2	2;1;1	2;1;1	2;1;1	sp|Q9H0H5|RGAP1_HUMAN Rac GTPase-activating protein 1 OS=Homo sapiens OX=9606 GN=RACGAP1 PE=1 SV=1;tr|F8W1E5|F8W1E5_HUMAN Isoform of Q9H0H5, Rac GTPase-activating protein 1 (Fragment) OS=Homo sapiens OX=9606 GN=RACGAP1 PE=1 SV=1;tr|F8VRD2|F8VRD2_HUMAN Isof	3	2	2	2	2	2	0	0	2	2	0	0	2	2	0	0	5.1	5.1	5.1	71.026	632	632;155;293	0	4.4452	1.0611	0.96444	7.8849	3	0	Median	1.0693	1.0368	NaN	NaN	0.95695	1.0963	NaN	NaN
		1.0204	1.0869	NaN	NaN	REV__Q9H4E7	REV__Q9H4E7	2	2	2	sp|Q9H4E7|DEFI6_HUMAN Differentially expressed in FDCP 6 homolog OS=Homo sapiens OX=9606 GN=DEF6 PE=1 SV=1	1	2	2	2	2	1	0	0	2	1	0	0	2	1	0	0	0	0	0	73.91	631	631	0.0038256	1.9654	0.9914	1.0869	22.936	3	0	Median	1.0614	0.9914	NaN	NaN	1.0204	1.0869	NaN	NaN
PISD	Phosphatidylserine decarboxylase proenzyme;Phosphatidylserine decarboxylase alpha chain;Phosphatidylserine decarboxylase beta chain	NaN	1.0859	NaN	NaN	B1AKM8;B1AKM6;H0Y7P7;Q9UG56-2;Q9UG56	B1AKM8;B1AKM6;H0Y7P7;Q9UG56-2;Q9UG56	1;1;1;1;1	1;1;1;1;1	1;1;1;1;1	tr|B1AKM8|B1AKM8_HUMAN Isoform of Q9UG56, Phosphatidylserine decarboxylase proenzyme, mitochondrial (Fragment) OS=Homo sapiens OX=9606 GN=PISD PE=1 SV=1;tr|B1AKM6|B1AKM6_HUMAN Isoform of Q9UG56, Phosphatidylserine decarboxylase proenzyme, mitochondrial OS=	5	1	1	1	0	1	0	0	0	1	0	0	0	1	0	0	5.7	5.7	5.7	26.282	228	228;262;362;375;409	0.0019739	2.1967	1.1367	1.0859	NaN	1	0	Median	NaN	1.1367	NaN	NaN	NaN	1.0859	NaN	NaN
RPL11	60S ribosomal protein L11	0.90661	1.0799	NaN	NaN	P62913-2	P62913-2	9	1	1	sp|P62913-2|RL11-2_HUMAN Isoform of P62913, Isoform 2 of 60S ribosomal protein L11 OS=Homo sapiens OX=9606 GN=RPL11 PE=1 SV=2	1	9	1	1	6	6	5	5	1	1	0	0	1	1	0	0	40.7	6.2	6.2	20.124	177	177	0.00082576	2.536	1.0502	0.98948	12.369	2	0	Median	0.89749	1.2288	NaN	NaN	0.90661	1.0799	NaN	NaN
BZW2	Basic leucine zipper and W2 domain-containing protein 2	0.89646	1.0761	1.047	NaN	B5MCE7;B5MCH7;E7ETZ4;Q9Y6E2;E9PFD4;Q75MG1	B5MCE7;B5MCH7;E7ETZ4;Q9Y6E2;E9PFD4	3;3;3;3;2;1	2;2;2;2;1;1	2;2;2;2;1;1	tr|B5MCE7|B5MCE7_HUMAN Isoform of Q9Y6E2, Basic leucine zipper and W2 domain-containing protein 2 OS=Homo sapiens OX=9606 GN=BZW2 PE=1 SV=1;tr|B5MCH7|B5MCH7_HUMAN Isoform of Q9Y6E2, Basic leucine zipper and W2 domain-containing protein 2 OS=Homo sapiens OX	6	3	2	2	2	3	1	0	1	2	1	0	1	2	1	0	11.6	8.4	8.4	26.182	225	225;343;408;419;189;274	0.001996	2.2895	0.94372	1.021	2.8386	4	0	Leave out requantified	0.97643	1.0667	0.71386	NaN	0.89646	1.0761	1.047	NaN
STAG2	Cohesin subunit SA-2	NaN	1.0758	0.72093	NaN	Q8N3U4-2;Q8N3U4;B1AMT4	Q8N3U4-2;Q8N3U4	3;3;1	3;3;1	2;2;0	sp|Q8N3U4-2|STAG2-2_HUMAN Isoform of Q8N3U4, Isoform 2 of Cohesin subunit SA-2 OS=Homo sapiens OX=9606 GN=STAG2 PE=1 SV=3;sp|Q8N3U4|STAG2_HUMAN Cohesin subunit SA-2 OS=Homo sapiens OX=9606 GN=STAG2 PE=1 SV=3	3	3	3	2	0	2	2	0	0	2	2	0	0	1	2	0	3.7	3.7	2.7	145.75	1268	1268;1231;548	0.00043422	3.0934	0.7119	0.88068	28.306	2	0	Median	NaN	1.0129	0.50034	NaN	NaN	1.0758	0.72093	NaN
BUB1B	Mitotic checkpoint serine/threonine-protein kinase BUB1 beta	NaN	1.0665	0.71168	NaN	O60566-3;O60566;O60566-2	O60566-3;O60566;O60566-2	3;3;2	3;3;2	3;3;2	sp|O60566-3|BUB1B-3_HUMAN Isoform of O60566, Isoform 3 of Mitotic checkpoint serine/threonine-protein kinase BUB1 beta OS=Homo sapiens OX=9606 GN=BUB1B PE=1 SV=3;sp|O60566|BUB1B_HUMAN Mitotic checkpoint serine/threonine-protein kinase BUB1 beta OS=Homo sap	3	3	3	3	1	2	2	0	1	2	2	0	1	2	2	0	2.7	2.7	2.7	121.38	1064	1064;1050;933	0.0019716	2.1917	0.7453	0.87122	28.604	2	0	Median	NaN	1.0072	0.55152	NaN	NaN	1.0665	0.71168	NaN
PDS5B	Sister chromatid cohesion protein PDS5 homolog B	0.97307	1.0595	0.78952	NaN	Q9NTI5;Q9NTI5-2;Q9NTI5-3	Q9NTI5;Q9NTI5-2	5;5;1	5;5;1	5;5;1	sp|Q9NTI5|PDS5B_HUMAN Sister chromatid cohesion protein PDS5 homolog B OS=Homo sapiens OX=9606 GN=PDS5B PE=1 SV=1;sp|Q9NTI5-2|PDS5B-2_HUMAN Isoform of Q9NTI5, Isoform 2 of Sister chromatid cohesion protein PDS5 homolog B OS=Homo sapiens OX=9606 GN=PDS5B PE	3	5	5	5	1	3	2	0	1	3	2	0	1	3	2	0	4.8	4.8	4.8	164.67	1447	1447;1391;529	0	6.2672	0.90239	0.97307	22.38	6	0	Leave out requantified	1.0596	0.99286	0.56851	NaN	0.97307	1.0595	0.78952	NaN
WDR1	WD repeat-containing protein 1	1.0613	1.054	1.3651	NaN	O75083;D6RD66;O75083-3	O75083;D6RD66	3;2;1	3;2;1	3;2;1	sp|O75083|WDR1_HUMAN WD repeat-containing protein 1 OS=Homo sapiens OX=9606 GN=WDR1 PE=1 SV=4;tr|D6RD66|D6RD66_HUMAN Isoform of O75083, WD repeat-containing protein 1 (Fragment) OS=Homo sapiens OX=9606 GN=WDR1 PE=1 SV=1	3	3	3	3	3	2	2	0	3	2	2	0	3	2	2	0	8.6	8.6	8.6	66.193	606	606;245;466	0	6.94	0.99935	1.1004	14.537	8	0	Leave out requantified	1.1829	1.0118	0.99274	NaN	1.0613	1.054	1.3651	NaN
ZCCHC9	Zinc finger CCHC domain-containing protein 9	0.86551	1.0521	NaN	NaN	Q8N567	Q8N567	1	1	1	sp|Q8N567|ZCHC9_HUMAN Zinc finger CCHC domain-containing protein 9 OS=Homo sapiens OX=9606 GN=ZCCHC9 PE=1 SV=2	1	1	1	1	1	1	0	0	1	1	0	0	1	1	0	0	4.4	4.4	4.4	30.477	271	271	0.0089477	1.4989	1.0622	0.95424	13.802	2	0	Median	0.934	1.208	NaN	NaN	0.86551	1.0521	NaN	NaN
PDCL3	Phosducin-like protein 3	0.72699	1.0517	0.82237	NaN	Q9H2J4;H7BZP2	Q9H2J4;H7BZP2	2;1	2;1	2;1	sp|Q9H2J4|PDCL3_HUMAN Phosducin-like protein 3 OS=Homo sapiens OX=9606 GN=PDCL3 PE=1 SV=1;tr|H7BZP2|H7BZP2_HUMAN Isoform of Q9H2J4, Phosducin-like protein 3 (Fragment) OS=Homo sapiens OX=9606 GN=PDCL3 PE=1 SV=1	2	2	2	2	1	1	1	0	1	1	1	0	1	1	1	0	11.7	11.7	11.7	27.614	239	239;150	0	5.9829	0.73848	1.0517	18.801	3	0	Plateau	0.73848	1.1584	0.62676	NaN	0.72699	1.0517	0.82237	NaN
RRP15	RRP15-like protein	0.75637	1.0459	NaN	NaN	Q9Y3B9	Q9Y3B9	1	1	1	sp|Q9Y3B9|RRP15_HUMAN RRP15-like protein OS=Homo sapiens OX=9606 GN=RRP15 PE=1 SV=2	1	1	1	1	1	1	0	0	1	1	0	0	1	1	0	0	3.9	3.9	3.9	31.484	282	282	0.0072833	1.6011	0.92812	0.88943	22.917	2	0	Median	0.7878	1.0934	NaN	NaN	0.75637	1.0459	NaN	NaN
CCNB1	G2/mitotic-specific cyclin-B1	1.6965	1.0456	1.0888	NaN	P14635-2;P14635;E9PC90;H0YA62;D6RHI0	P14635-2;P14635;E9PC90	3;3;2;1;1	3;3;2;1;1	3;3;2;1;1	sp|P14635-2|CCNB1-2_HUMAN Isoform of P14635, Isoform 2 of G2/mitotic-specific cyclin-B1 OS=Homo sapiens OX=9606 GN=CCNB1 PE=1 SV=1;sp|P14635|CCNB1_HUMAN G2/mitotic-specific cyclin-B1 OS=Homo sapiens OX=9606 GN=CCNB1 PE=1 SV=1;tr|E9PC90|E9PC90_HUMAN Isoform	5	3	3	3	1	1	1	1	1	1	1	1	1	1	1	1	14.9	14.9	14.9	44.102	396	396;433;401;185;244	0	4.112	0.9947	1.3591	26.849	3	0	Plateau	1.8532	0.9947	0.80634	NaN	1.6965	1.0456	1.0888	NaN
ATXN2	Ataxin-2	0.95936	1.0391	NaN	NaN	H0YH87;A0A2R8Y7P6;A0A2R8YDM9;F8VQP2;F8WB06;V9GY86;A0A2R8Y7E6;A0A2R8Y5A6;Q99700-2;Q99700-5;Q99700-4;Q99700;F8VRK6;F8W0B5	H0YH87;A0A2R8Y7P6;A0A2R8YDM9;F8VQP2;F8WB06;V9GY86;A0A2R8Y7E6;A0A2R8Y5A6;Q99700-2;Q99700-5;Q99700-4;Q99700;F8VRK6;F8W0B5	2;2;2;2;2;2;2;2;2;2;2;2;1;1	2;2;2;2;2;2;2;2;2;2;2;2;1;1	2;2;2;2;2;2;2;2;2;2;2;2;1;1	tr|H0YH87|H0YH87_HUMAN Isoform of Q99700, Ataxin-2 OS=Homo sapiens OX=9606 GN=ATXN2 PE=1 SV=2;tr|A0A2R8Y7P6|A0A2R8Y7P6_HUMAN Isoform of Q99700, Ataxin-2 OS=Homo sapiens OX=9606 GN=ATXN2 PE=1 SV=1;tr|A0A2R8YDM9|A0A2R8YDM9_HUMAN Isoform of Q99700, Ataxin-2 O	14	2	2	2	1	1	0	0	1	1	0	0	1	1	0	0	3.7	3.7	3.7	90.166	835	835;957;968;1073;1085;1153;1158;1166;995;1006;1243;1313;235;296	0	4.2708	1.0175	0.99845	5.6482	2	1	Median	1.0414	0.99407	NaN	NaN	0.95936	1.0391	NaN	NaN
STRN3	Striatin-3	0.84763	1.0386	0.88829	NaN	Q13033-2;Q13033	Q13033-2;Q13033	2;2	2;2	2;2	sp|Q13033-2|STRN3-2_HUMAN Isoform of Q13033, Isoform Alpha of Striatin-3 OS=Homo sapiens OX=9606 GN=STRN3 PE=1 SV=3;sp|Q13033|STRN3_HUMAN Striatin-3 OS=Homo sapiens OX=9606 GN=STRN3 PE=1 SV=3	2	2	2	2	2	1	2	0	2	1	2	0	2	1	2	0	3.6	3.6	3.6	77.744	713	713;797	0	5.4652	0.93338	0.92463	4.7496	5	1	Leave out requantified	0.93338	0.97599	0.59495	NaN	0.84763	1.0386	0.88829	NaN
HARS	Histidine--tRNA ligase, cytoplasmic	1.3236	1.0333	1.1794	NaN	B4DDD8;B3KWE1;P12081-4;P12081;E7ETE2;B4E1C5;P12081-3;P12081-2;B4DQ67;D6RB22;A0A2R8Y6I1;A0A2R8Y3N3;A0A2R8Y5P7;P49590-2;P49590	B4DDD8;B3KWE1;P12081-4;P12081;E7ETE2;B4E1C5;P12081-3;P12081-2	3;3;3;3;2;2;2;2;1;1;1;1;1;1;1	3;3;3;3;2;2;2;2;1;1;1;1;1;1;1	3;3;3;3;2;2;2;2;1;1;1;1;1;1;1	tr|B4DDD8|B4DDD8_HUMAN Isoform of P12081, Histidine--tRNA ligase, cytoplasmic OS=Homo sapiens OX=9606 GN=HARS PE=1 SV=1;tr|B3KWE1|B3KWE1_HUMAN Isoform of P12081, Histidine--tRNA ligase, cytoplasmic OS=Homo sapiens OX=9606 GN=HARS PE=1 SV=1;sp|P12081-4|SYHC	15	3	3	3	3	1	1	0	3	1	1	0	3	1	1	0	8.7	8.7	8.7	48.569	435	435;440;489;509;288;395;449;469;334;399;436;473;512;481;506	0.00043975	3.2713	1.1147	1.168	1.3696	5	1	Leave out requantified	1.4429	0.98269	0.91666	NaN	1.3236	1.0333	1.1794	NaN
FOXK2	Forkhead box protein K2	0.94899	1.0328	1.1707	NaN	Q01167;Q01167-2;I3L4U8	Q01167;Q01167-2	3;3;1	3;3;1	3;3;1	sp|Q01167|FOXK2_HUMAN Forkhead box protein K2 OS=Homo sapiens OX=9606 GN=FOXK2 PE=1 SV=3;sp|Q01167-2|FOXK2-2_HUMAN Isoform of Q01167, Isoform 2 of Forkhead box protein K2 OS=Homo sapiens OX=9606 GN=FOXK2 PE=1 SV=3	3	3	3	3	2	2	3	1	2	2	3	1	2	2	3	1	11.1	11.1	11.1	69.061	660	660;614;129	0	120.96	0.90887	1.0327	5.1702	6	1	Leave out requantified	1.0578	0.98215	0.74682	NaN	0.94899	1.0328	1.1707	NaN
DGKA	Diacylglycerol kinase;Diacylglycerol kinase alpha	1.3526	1.031	NaN	NaN	H0YJH4;G3V4E1;P23743	H0YJH4;G3V4E1;P23743	1;1;1	1;1;1	1;1;1	tr|H0YJH4|H0YJH4_HUMAN Isoform of P23743, Diacylglycerol kinase (Fragment) OS=Homo sapiens OX=9606 GN=DGKA PE=1 SV=1;tr|G3V4E1|G3V4E1_HUMAN Isoform of P23743, Diacylglycerol kinase (Fragment) OS=Homo sapiens OX=9606 GN=DGKA PE=1 SV=1;sp|P23743|DGKA_HUMAN D	3	1	1	1	1	1	0	0	1	1	0	0	1	1	0	0	8.4	8.4	8.4	22.765	202	202;545;735	0.0023041	2.0036	1.2194	1.1809	19.199	2	0	Median	1.5058	0.98752	NaN	NaN	1.3526	1.031	NaN	NaN
DAXX	Death domain-associated protein 6	NaN	1.0284	0.75676	NaN	Q9UER7-3;Q9UER7-5;Q9UER7-4;Q9UER7-2;Q9UER7	Q9UER7-3;Q9UER7-5;Q9UER7-4;Q9UER7-2;Q9UER7	1;1;1;1;1	1;1;1;1;1	1;1;1;1;1	sp|Q9UER7-3|DAXX-3_HUMAN Isoform of Q9UER7, Isoform 3 of Death domain-associated protein 6 OS=Homo sapiens OX=9606 GN=DAXX PE=1 SV=2;sp|Q9UER7-5|DAXX-5_HUMAN Isoform of Q9UER7, Isoform gamma of Death domain-associated protein 6 OS=Homo sapiens OX=9606 GN=D	5	1	1	1	0	1	1	0	0	1	1	0	0	1	1	0	2.7	2.7	2.7	73.588	665	665;682;688;710;740	0.00082884	2.5608	0.678	0.88217	21.685	2	1	Median	NaN	0.97173	0.47306	NaN	NaN	1.0284	0.75676	NaN
NOS1AP	Carboxyl-terminal PDZ ligand of neuronal nitric oxide synthase protein	0.8617	1.028	NaN	NaN	O75052-3;O75052;E9PIP8;H7C2G1;E9PSG0;O75052-2	O75052-3;O75052;E9PIP8;H7C2G1;E9PSG0;O75052-2	2;2;1;1;1;1	2;2;1;1;1;1	2;2;1;1;1;1	sp|O75052-3|CAPON-3_HUMAN Isoform of O75052, Isoform 3 of Carboxyl-terminal PDZ ligand of neuronal nitric oxide synthase protein OS=Homo sapiens OX=9606 GN=NOS1AP PE=1 SV=3;sp|O75052|CAPON_HUMAN Carboxyl-terminal PDZ ligand of neuronal nitric oxide synthas	6	2	2	2	1	1	0	0	1	1	0	0	1	1	0	0	4	4	4	55.568	501	501;506;81;150;349;211	0.00043497	3.1284	0.96399	0.94117	12.476	2	0	Median	0.95319	0.97491	NaN	NaN	0.8617	1.028	NaN	NaN
AATF	Protein AATF	NaN	1.0254	0.72031	NaN	Q9NY61	Q9NY61	2	2	2	sp|Q9NY61|AATF_HUMAN Protein AATF OS=Homo sapiens OX=9606 GN=AATF PE=1 SV=1	1	2	2	2	0	1	1	0	0	1	1	0	0	1	1	0	4.6	4.6	4.6	63.132	560	560	0	3.7545	0.78	0.85944	24.974	2	0	Median	NaN	1.0252	0.59345	NaN	NaN	1.0254	0.72031	NaN
ARHGAP10	Rho GTPase-activating protein 10	1.3216	1.021	NaN	NaN	A1A4S6	A1A4S6	1	1	1	sp|A1A4S6|RHG10_HUMAN Rho GTPase-activating protein 10 OS=Homo sapiens OX=9606 GN=ARHGAP10 PE=1 SV=1	1	1	1	1	1	1	0	0	1	1	0	0	1	1	0	0	1.3	1.3	1.3	89.374	786	786	0.0072622	1.5845	1.1922	1.1616	18.25	2	0	Median	1.4369	0.98911	NaN	NaN	1.3216	1.021	NaN	NaN
		NaN	1.0155	NaN	NaN	REV__Q9BRR6-4;REV__Q9BRR6-3;REV__Q9BRR6-2;REV__Q9BRR6	REV__Q9BRR6-4;REV__Q9BRR6-3;REV__Q9BRR6-2;REV__Q9BRR6	1;1;1;1	1;1;1;1	1;1;1;1	sp|Q9BRR6-4|ADPGK-4_HUMAN Isoform of Q9BRR6, Isoform 4 of ADP-dependent glucokinase OS=Homo sapiens OX=9606 GN=ADPGK PE=1 SV=1;sp|Q9BRR6-3|ADPGK-3_HUMAN Isoform of Q9BRR6, Isoform 3 of ADP-dependent glucokinase OS=Homo sapiens OX=9606 GN=ADPGK PE=1 SV=1;sp	4	1	1	1	0	1	0	0	0	1	0	0	0	1	0	0	0	0	0	24.13	222	222;258;496;497	1	-2	1.0696	1.0155	NaN	1	0	Median	NaN	1.0696	NaN	NaN	NaN	1.0155	NaN	NaN
DNAH6	Dynein heavy chain 6, axonemal	NaN	1.0148	0.66457	NaN	Q9C0G6;Q9C0G6-4	Q9C0G6;Q9C0G6-4	2;1	2;1	2;1	sp|Q9C0G6|DYH6_HUMAN Dynein heavy chain 6, axonemal OS=Homo sapiens OX=9606 GN=DNAH6 PE=2 SV=3;sp|Q9C0G6-4|DYH6-4_HUMAN Isoform of Q9C0G6, Isoform 4 of Dynein heavy chain 6, axonemal OS=Homo sapiens OX=9606 GN=DNAH6 PE=2 SV=3	2	2	2	2	0	1	2	0	0	1	2	0	0	1	2	0	0.5	0.5	0.5	475.98	4158	4158;2530	0.00083056	2.5773	0.47126	0.67177	24.464	3	0	Median	NaN	0.85379	0.4541	NaN	NaN	1.0148	0.66457	NaN
MRPL47	39S ribosomal protein L47, mitochondrial	NaN	1.0147	0.90631	NaN	Q9HD33;Q9HD33-2;Q9HD33-3	Q9HD33;Q9HD33-2	3;3;1	3;3;1	3;3;1	sp|Q9HD33|RM47_HUMAN 39S ribosomal protein L47, mitochondrial OS=Homo sapiens OX=9606 GN=MRPL47 PE=1 SV=2;sp|Q9HD33-2|RM47-2_HUMAN Isoform of Q9HD33, Isoform 2 of 39S ribosomal protein L47, mitochondrial OS=Homo sapiens OX=9606 GN=MRPL47 PE=1 SV=2	3	3	3	3	0	1	2	0	0	1	2	0	0	1	2	0	14.4	14.4	14.4	29.45	250	250;230;140	0.00044464	3.3769	0.68428	1.0147	27.179	3	0	Leave out requantified	NaN	1.1546	0.55993	NaN	NaN	1.0147	0.90631	NaN
CUL1	Cullin-1	0.93707	1.014	NaN	NaN	A0A0C4DGX4;Q13616	A0A0C4DGX4;Q13616	5;5	5;5	5;5	tr|A0A0C4DGX4|A0A0C4DGX4_HUMAN Isoform of Q13616, Cullin-1 OS=Homo sapiens OX=9606 GN=CUL1 PE=1 SV=1;sp|Q13616|CUL1_HUMAN Cullin-1 OS=Homo sapiens OX=9606 GN=CUL1 PE=1 SV=2	2	5	5	5	4	2	0	0	4	2	0	0	4	2	0	0	8.8	8.8	8.8	87.387	752	752;776	0	12.116	1.0942	0.99473	18.694	6	0	Leave out requantified	1.0222	0.97371	NaN	NaN	0.93707	1.014	NaN	NaN
SUB1	Activated RNA polymerase II transcriptional coactivator p15	1.05	1.0101	0.33406	NaN	P53999;D6RC37;D6R970	P53999	3;1;1	3;1;1	3;1;1	sp|P53999|TCP4_HUMAN Activated RNA polymerase II transcriptional coactivator p15 OS=Homo sapiens OX=9606 GN=SUB1 PE=1 SV=3	3	3	3	3	2	1	2	0	2	1	2	0	2	1	2	0	32.3	32.3	32.3	14.395	127	127;65;84	0	8.3541	1.0488	1.0101	2.7561	6	1	Leave out requantified	1.0488	1.3411	0.21506	NaN	1.05	1.0101	0.33406	NaN
TBK1	Serine/threonine-protein kinase TBK1	0.79828	1.0061	0.88027	NaN	A0A494C0X2;A0A494C167;A0A494C148;A0A494C045;Q9UHD2;A0A494C0R4;A0A494C0A8;A0A494C1M6;A0A494C079	A0A494C0X2;A0A494C167;A0A494C148;A0A494C045;Q9UHD2;A0A494C0R4;A0A494C0A8;A0A494C1M6;A0A494C079	4;4;4;4;4;3;3;3;2	4;4;4;4;4;3;3;3;2	4;4;4;4;4;3;3;3;2	tr|A0A494C0X2|A0A494C0X2_HUMAN Isoform of Q9UHD2, Serine/threonine-protein kinase TBK1 OS=Homo sapiens OX=9606 GN=TBK1 PE=4 SV=1;tr|A0A494C167|A0A494C167_HUMAN Isoform of Q9UHD2, Serine/threonine-protein kinase TBK1 OS=Homo sapiens OX=9606 GN=TBK1 PE=4 SV=	9	4	4	4	4	2	2	0	4	2	2	0	4	2	2	0	9.3	9.3	9.3	73.8	643	643;677;705;731;729;542;551;575;519	0	30.201	0.89154	0.85025	12.615	7	0	Leave out requantified	0.89154	0.94613	0.59249	NaN	0.79828	1.0061	0.88027	NaN
HMMR	Hyaluronan mediated motility receptor	0.88806	1.0038	NaN	NaN	O75330-4;O75330-2;O75330;O75330-3	O75330-4;O75330-2;O75330;O75330-3	1;1;1;1	1;1;1;1	1;1;1;1	sp|O75330-4|HMMR-4_HUMAN Isoform of O75330, Isoform 4 of Hyaluronan mediated motility receptor OS=Homo sapiens OX=9606 GN=HMMR PE=1 SV=2;sp|O75330-2|HMMR-2_HUMAN Isoform of O75330, Isoform 2 of Hyaluronan mediated motility receptor OS=Homo sapiens OX=9606	4	1	1	1	1	1	0	0	1	1	0	0	1	1	0	0	1.9	1.9	1.9	74.494	638	638;709;724;725	0.0096188	1.4774	0.97134	0.94414	8.6603	2	0	Median	0.98198	0.96082	NaN	NaN	0.88806	1.0038	NaN	NaN
CACTIN	Cactin	0.5771	1.0029	0.80445	NaN	Q8WUQ7;Q8WUQ7-2	Q8WUQ7;Q8WUQ7-2	2;2	2;2	2;2	sp|Q8WUQ7|CATIN_HUMAN Cactin OS=Homo sapiens OX=9606 GN=CACTIN PE=1 SV=3;sp|Q8WUQ7-2|CATIN-2_HUMAN Isoform of Q8WUQ7, Isoform 2 of Cactin OS=Homo sapiens OX=9606 GN=CACTIN PE=1 SV=3	2	2	2	2	1	1	1	1	1	1	1	1	1	1	1	1	4.2	4.2	4.2	88.701	758	758;935	0.00043103	2.9924	0.59201	0.97805	27.82	3	2	Plateau	0.59201	0.94862	0.57368	NaN	0.5771	1.0029	0.80445	NaN
C22orf15	Uncharacterized protein C22orf15	NaN	0.99958	0.99654	NaN	Q14D93;A0A0G2JR24;Q8WYQ4	Q14D93;A0A0G2JR24;Q8WYQ4	1;1;1	1;1;1	1;1;1	tr|Q14D93|Q14D93_HUMAN Isoform of Q8WYQ4, Chromosome 22 open reading frame 15 OS=Homo sapiens OX=9606 GN=C22orf15 PE=2 SV=2;tr|A0A0G2JR24|A0A0G2JR24_HUMAN Isoform of Q8WYQ4, Uncharacterized protein C22orf15 (Fragment) OS=Homo sapiens OX=9606 GN=C22orf15 PE	3	1	1	1	0	1	1	0	0	1	1	0	0	1	1	0	9.1	9.1	9.1	15.194	132	132;140;148	0.0055845	1.7618	0.8011	0.99806	0.21509	2	0	Median	NaN	1.0706	0.59944	NaN	NaN	0.99958	0.99654	NaN
SLC25A32	Mitochondrial folate transporter/carrier	NaN	0.99955	NaN	NaN	Q9H2D1;E5RGK5;E5RFL3;E5RGT9;A0A3B3IRK5	Q9H2D1;E5RGK5;E5RFL3;E5RGT9;A0A3B3IRK5	2;1;1;1;1	2;1;1;1;1	2;1;1;1;1	sp|Q9H2D1|MFTC_HUMAN Mitochondrial folate transporter/carrier OS=Homo sapiens OX=9606 GN=SLC25A32 PE=1 SV=2;tr|E5RGK5|E5RGK5_HUMAN Isoform of Q9H2D1, Mitochondrial folate transporter/carrier OS=Homo sapiens OX=9606 GN=SLC25A32 PE=1 SV=1;tr|E5RFL3|E5RFL3_HU	5	2	2	2	0	2	0	0	0	2	0	0	0	2	0	0	8.3	8.3	8.3	35.407	315	315;123;123;149;264	0.0041588	1.8908	1.1009	0.99955	NaN	1	0	Median	NaN	1.1009	NaN	NaN	NaN	0.99955	NaN	NaN
FAM49B	Protein FAM49B	0.73539	0.99917	0.80664	NaN	Q9NUQ9;E5RI16;A0A1W2PRQ0;E5RJE1;E5RIR8;E5RJL8;A0A087X178;Q9NUQ9-2;E5RK61;E5RFS4;E5RHU5;E5RGI7;Q9H0Q0	Q9NUQ9;E5RI16;A0A1W2PRQ0	5;3;3;2;2;2;2;2;1;1;1;1;1	5;3;3;2;2;2;2;2;1;1;1;1;1	5;3;3;2;2;2;2;2;1;1;1;1;1	sp|Q9NUQ9|FA49B_HUMAN Protein FAM49B OS=Homo sapiens OX=9606 GN=FAM49B PE=1 SV=1;tr|E5RI16|E5RI16_HUMAN Isoform of Q9NUQ9, Protein FAM49B (Fragment) OS=Homo sapiens OX=9606 GN=FAM49B PE=1 SV=1;tr|A0A1W2PRQ0|A0A1W2PRQ0_HUMAN Isoform of Q9NUQ9, Protein FAM49	13	5	5	5	4	1	4	0	4	1	4	0	4	1	4	0	23.1	23.1	23.1	36.748	324	324;155;218;93;98;100;217;178;63;65;68;78;323	0	12.533	0.88723	0.87683	22.747	8	3	Leave out requantified	0.77829	1.1011	0.55157	NaN	0.73539	0.99917	0.80664	NaN
SFSWAP	Splicing factor, suppressor of white-apricot homolog	NaN	0.99574	NaN	NaN	Q12872;Q12872-2	Q12872;Q12872-2	1;1	1;1	1;1	sp|Q12872|SFSWA_HUMAN Splicing factor, suppressor of white-apricot homolog OS=Homo sapiens OX=9606 GN=SFSWAP PE=1 SV=3;sp|Q12872-2|SFSWA-2_HUMAN Isoform of Q12872, Isoform 2 of Splicing factor, suppressor of white-apricot homolog OS=Homo sapiens OX=9606 GN	2	1	1	1	0	1	0	0	0	1	0	0	0	1	0	0	1.6	1.6	1.6	104.82	951	951;1003	0.00083787	2.6607	0.8821	0.99574	NaN	1	0	Median	NaN	0.8821	NaN	NaN	NaN	0.99574	NaN	NaN
ECHS1	Enoyl-CoA hydratase, mitochondrial	1.2739	0.9927	NaN	NaN	P30084	P30084	1	1	1	sp|P30084|ECHM_HUMAN Enoyl-CoA hydratase, mitochondrial OS=Homo sapiens OX=9606 GN=ECHS1 PE=1 SV=4	1	1	1	1	1	1	0	0	1	1	0	0	1	1	0	0	7.2	7.2	7.2	31.387	290	290	0	16.495	1.1447	1.1246	17.638	2	1	Median	1.2823	1.0219	NaN	NaN	1.2739	0.9927	NaN	NaN
C1orf109	Uncharacterized protein C1orf109	NaN	0.99241	NaN	NaN	A0A087WUX7;V9GYT8;V9GYI2;V9GY35;V9GYN4;V9GYQ8;Q9NX04-2;Q9NX04	A0A087WUX7;V9GYT8;V9GYI2;V9GY35;V9GYN4;V9GYQ8;Q9NX04-2;Q9NX04	1;1;1;1;1;1;1;1	1;1;1;1;1;1;1;1	1;1;1;1;1;1;1;1	tr|A0A087WUX7|A0A087WUX7_HUMAN Isoform of Q9NX04, Uncharacterized protein C1orf109 (Fragment) OS=Homo sapiens OX=9606 GN=C1orf109 PE=1 SV=6;tr|V9GYT8|V9GYT8_HUMAN Isoform of Q9NX04, Uncharacterized protein C1orf109 (Fragment) OS=Homo sapiens OX=9606 GN=C1o	8	1	1	1	0	1	0	0	0	1	0	0	0	1	0	0	40.5	40.5	40.5	4.2569	37	37;91;113;142;151;191;113;203	0.0066494	1.6824	1.0578	0.99241	NaN	1	0	Median	NaN	1.0578	NaN	NaN	NaN	0.99241	NaN	NaN
EIF3E		NaN	0.99147	NaN	NaN	E5RIP5	E5RIP5	2	1	1	tr|E5RIP5|E5RIP5_HUMAN Isoform of P60228, Eukaryotic translation initiation factor 3 subunit E OS=Homo sapiens OX=9606 GN=EIF3E PE=1 SV=1	1	2	1	1	1	2	1	1	0	1	0	0	0	1	0	0	40	22.2	22.2	5.4003	45	45	1	-2	0.96776	0.99147	NaN	1	0	Median	NaN	0.96776	NaN	NaN	NaN	0.99147	NaN	NaN
TBL2	Transducin beta-like protein 2	0.97691	0.99015	0.58323	NaN	E9PF19;Q9Y4P3;Q96E41	E9PF19;Q9Y4P3;Q96E41	2;2;1	2;2;1	2;2;1	tr|E9PF19|E9PF19_HUMAN Isoform of Q9Y4P3, Transducin beta-like protein 2 OS=Homo sapiens OX=9606 GN=TBL2 PE=1 SV=1;sp|Q9Y4P3|TBL2_HUMAN Transducin beta-like protein 2 OS=Homo sapiens OX=9606 GN=TBL2 PE=1 SV=1;tr|Q96E41|Q96E41_HUMAN Isoform of Q9Y4P3, TBL2	3	2	2	2	1	1	1	0	1	1	1	0	1	1	1	0	6.3	6.3	6.3	45.935	411	411;447;446	0	3.8275	1.0198	0.97691	30.177	3	0	Median	1.0675	1.0198	0.42601	NaN	0.97691	0.99015	0.58323	NaN
STRIP1	Striatin-interacting protein 1	0.98989	0.9844	NaN	NaN	Q5VSL9-3;Q5VSL9-2;Q5VSL9	Q5VSL9-3;Q5VSL9-2;Q5VSL9	1;1;1	1;1;1	1;1;1	sp|Q5VSL9-3|STRP1-3_HUMAN Isoform of Q5VSL9, Isoform 3 of Striatin-interacting protein 1 OS=Homo sapiens OX=9606 GN=STRIP1 PE=1 SV=1;sp|Q5VSL9-2|STRP1-2_HUMAN Isoform of Q5VSL9, Isoform 2 of Striatin-interacting protein 1 OS=Homo sapiens OX=9606 GN=STRIP1	3	1	1	1	1	1	0	0	1	1	0	0	1	1	0	0	3.2	3.2	3.2	49.698	440	440;742;837	0.003064	1.9813	1.0178	0.98714	0.39371	2	0	Median	1.0869	0.95313	NaN	NaN	0.98989	0.9844	NaN	NaN
GTF2F1	General transcription factor IIF subunit 1	3.0031	0.98213	0.51814	NaN	P35269;M0R0R9;M0QXD6;M0R0Z3	P35269;M0R0R9;M0QXD6;M0R0Z3	4;3;3;2	4;3;3;2	4;3;3;2	sp|P35269|T2FA_HUMAN General transcription factor IIF subunit 1 OS=Homo sapiens OX=9606 GN=GTF2F1 PE=1 SV=2;tr|M0R0R9|M0R0R9_HUMAN Isoform of P35269, General transcription factor IIF subunit 1 (Fragment) OS=Homo sapiens OX=9606 GN=GTF2F1 PE=1 SV=1;tr|M0QXD	4	4	4	4	1	1	4	0	1	1	4	0	1	1	4	0	13.9	13.9	13.9	58.24	517	517;381;433;127	0	194.87	0.7741	0.98213	88.124	5	4	Median	3.2226	0.91066	0.3294	NaN	3.0031	0.98213	0.51814	NaN
TNPO3	Transportin-3	1.0756	0.97932	1.0835	NaN	Q9Y5L0-5;Q9Y5L0-3;Q9Y5L0;E9PFH4;C9J7E5;Q9Y5L0-1	Q9Y5L0-5;Q9Y5L0-3;Q9Y5L0;E9PFH4;C9J7E5;Q9Y5L0-1	5;5;5;4;4;4	5;5;5;4;4;4	5;5;5;4;4;4	sp|Q9Y5L0-5|TNPO3-5_HUMAN Isoform of Q9Y5L0, Isoform 4 of Transportin-3 OS=Homo sapiens OX=9606 GN=TNPO3 PE=1 SV=3;sp|Q9Y5L0-3|TNPO3-3_HUMAN Isoform of Q9Y5L0, Isoform 3 of Transportin-3 OS=Homo sapiens OX=9606 GN=TNPO3 PE=1 SV=3;sp|Q9Y5L0|TNPO3_HUMAN Tran	6	5	5	5	4	1	5	0	4	1	5	0	4	1	5	0	9	9	9	97.371	859	859;909;923;857;957;957	0	14.97	0.89139	1.079	4.9755	8	1	Leave out requantified	1.1841	0.89139	0.69247	NaN	1.0756	0.97932	1.0835	NaN
UCKL1	Uridine-cytidine kinase-like 1	NaN	0.97532	NaN	NaN	Q9NWZ5-3;Q9NWZ5-2;Q9NWZ5-4;Q9NWZ5	Q9NWZ5-3;Q9NWZ5-2;Q9NWZ5-4;Q9NWZ5	1;1;1;1	1;1;1;1	1;1;1;1	sp|Q9NWZ5-3|UCKL1-3_HUMAN Isoform of Q9NWZ5, Isoform 3 of Uridine-cytidine kinase-like 1 OS=Homo sapiens OX=9606 GN=UCKL1 PE=1 SV=2;sp|Q9NWZ5-2|UCKL1-2_HUMAN Isoform of Q9NWZ5, Isoform 2 of Uridine-cytidine kinase-like 1 OS=Homo sapiens OX=9606 GN=UCKL1 PE	4	1	1	1	0	1	0	0	0	1	0	0	0	1	0	0	3.8	3.8	3.8	44.567	395	395;419;533;548	0.00084638	2.7975	0.92494	0.97532	NaN	1	0	Median	NaN	0.92494	NaN	NaN	NaN	0.97532	NaN	NaN
ATRIP	ATR-interacting protein	0.89267	0.97329	NaN	NaN	A0A0U1RQW3;A0A0U1RQJ8;Q8WXE1-5;Q8WXE1-3;Q8WXE1-2;Q8WXE1	A0A0U1RQW3;A0A0U1RQJ8;Q8WXE1-5;Q8WXE1-3;Q8WXE1-2;Q8WXE1	1;1;1;1;1;1	1;1;1;1;1;1	1;1;1;1;1;1	tr|A0A0U1RQW3|A0A0U1RQW3_HUMAN Isoform of Q8WXE1, ATR-interacting protein OS=Homo sapiens OX=9606 GN=ATRIP PE=1 SV=1;tr|A0A0U1RQJ8|A0A0U1RQJ8_HUMAN Isoform of Q8WXE1, ATR-interacting protein (Fragment) OS=Homo sapiens OX=9606 GN=ATRIP PE=1 SV=2;sp|Q8WXE1-5	6	1	1	1	1	1	0	0	1	1	0	0	1	1	0	0	3.2	3.2	3.2	50.303	464	464;604;664;698;764;791	0.0041635	1.8972	0.94333	0.93211	6.114	2	0	Median	0.96834	0.91896	NaN	NaN	0.89267	0.97329	NaN	NaN
TAF1B	TATA box-binding protein-associated factor RNA polymerase I subunit B	NaN	0.96969	NaN	NaN	F8WE32;Q53T94-2;Q53T94	F8WE32;Q53T94-2;Q53T94	1;1;1	1;1;1	1;1;1	tr|F8WE32|F8WE32_HUMAN Isoform of Q53T94, TATA box-binding protein-associated factor RNA polymerase I subunit B OS=Homo sapiens OX=9606 GN=TAF1B PE=1 SV=1;sp|Q53T94-2|TAF1B-2_HUMAN Isoform of Q53T94, Isoform 2 of TATA box-binding protein-associated factor	3	1	1	1	0	1	0	0	0	1	0	0	0	1	0	0	8.2	8.2	8.2	22.239	194	194;522;588	0.0023465	2.1157	0.92087	0.96969	NaN	1	0	Median	NaN	0.92087	NaN	NaN	NaN	0.96969	NaN	NaN
DNAJC16	DnaJ homolog subfamily C member 16	0.7327	0.9689	NaN	NaN	Q5TDG9;Q5TDH4;Q9Y2G8;Q9Y2G8-2	Q5TDG9;Q5TDH4;Q9Y2G8	3;3;3;1	3;3;3;1	3;3;3;1	tr|Q5TDG9|Q5TDG9_HUMAN Isoform of Q9Y2G8, DnaJ (Hsp40) homolog, subfamily C, member 16, isoform CRA_a OS=Homo sapiens OX=9606 GN=DNAJC16 PE=1 SV=1;tr|Q5TDH4|Q5TDH4_HUMAN Isoform of Q9Y2G8, DnaJ homolog subfamily C member 16 OS=Homo sapiens OX=9606 GN=DNAJC	4	3	3	3	1	2	0	1	1	2	0	1	1	2	0	1	7.1	7.1	7.1	69.312	595	595;655;782;470	0	11.988	0.85757	0.89135	18.162	3	2	Median	0.79679	0.93674	NaN	NaN	0.7327	0.9689	NaN	NaN
NDUFA6	NADH dehydrogenase [ubiquinone] 1 alpha subcomplex subunit 6	0.91091	0.96447	NaN	NaN	A0A0C4DGS0;A0A2Y9D025;P56556;R4GN43	A0A0C4DGS0;A0A2Y9D025;P56556;R4GN43	3;3;3;2	3;3;3;2	3;3;3;2	tr|A0A0C4DGS0|A0A0C4DGS0_HUMAN Isoform of P56556, NADH dehydrogenase [ubiquinone] 1 alpha subcomplex subunit 6 OS=Homo sapiens OX=9606 GN=NDUFA6 PE=1 SV=1;tr|A0A2Y9D025|A0A2Y9D025_HUMAN Isoform of P56556, NADH dehydrogenase [ubiquinone] 1 alpha subcomplex	4	3	3	3	2	2	0	0	2	2	0	0	2	2	0	0	26.6	26.6	26.6	15.136	128	128;154;128;71	0.00043687	3.1744	1.0719	0.9236	7.588	4	0	Leave out requantified	0.91627	1.1863	NaN	NaN	0.91091	0.96447	NaN	NaN
RBM7	RNA-binding protein 7	1.4411	0.95601	1.9222	NaN	I3L521;F5GXV8;F5GY08;J3KPD3;Q9Y580	I3L521;F5GXV8;F5GY08;J3KPD3;Q9Y580	1;1;1;1;1	1;1;1;1;1	1;1;1;1;1	tr|I3L521|I3L521_HUMAN Uncharacterized protein (Fragment) OS=Homo sapiens OX=9606 PE=4 SV=1;tr|F5GXV8|F5GXV8_HUMAN Isoform of Q9Y580, RNA-binding protein 7 OS=Homo sapiens OX=9606 GN=RBM7 PE=1 SV=1;tr|F5GY08|F5GY08_HUMAN Isoform of Q9Y580, RNA-binding prot	5	1	1	1	1	1	1	0	1	1	1	0	1	1	1	0	9.5	9.5	9.5	16.436	148	148;149;220;267;266	0	8.6884	1.262	1.4411	35.1	3	2	Median	1.5034	1.1053	1.262	NaN	1.4411	0.95601	1.9222	NaN
NCDN	Neurochondrin	1.3374	0.95586	1.6603	NaN	Q9UBB6-2;Q9UBB6;Q9UBB6-3;C9J5H8	Q9UBB6-2;Q9UBB6;Q9UBB6-3;C9J5H8	4;4;4;3	4;4;4;3	4;4;4;3	sp|Q9UBB6-2|NCDN-2_HUMAN Isoform of Q9UBB6, Isoform 2 of Neurochondrin OS=Homo sapiens OX=9606 GN=NCDN PE=1 SV=1;sp|Q9UBB6|NCDN_HUMAN Neurochondrin OS=Homo sapiens OX=9606 GN=NCDN PE=1 SV=1;sp|Q9UBB6-3|NCDN-3_HUMAN Isoform of Q9UBB6, Isoform 3 of Neurochon	4	4	4	4	3	1	3	0	3	1	3	0	3	1	3	0	5.9	5.9	5.9	77.242	712	712;729;731;244	0	5.8251	1.0848	1.2678	32.806	7	0	Leave out requantified	1.4697	0.88785	1.2343	NaN	1.3374	0.95586	1.6603	NaN
LMAN1	Protein ERGIC-53	1.227	0.95084	0.90701	NaN	P49257	P49257	2	2	2	sp|P49257|LMAN1_HUMAN Protein ERGIC-53 OS=Homo sapiens OX=9606 GN=LMAN1 PE=1 SV=2	1	2	2	2	2	2	1	0	2	2	1	0	2	2	1	0	6.5	6.5	6.5	57.548	510	510	0	3.5324	0.96392	1.0549	21.359	5	0	Leave out requantified	1.3106	0.89986	0.68673	NaN	1.227	0.95084	0.90701	NaN
		NaN	0.95005	NaN	NaN	REV__A0A1B0GTU9;REV__O14646-2;REV__O14646;REV__O14647-2;REV__O14647	REV__A0A1B0GTU9;REV__O14646-2;REV__O14646;REV__O14647-2;REV__O14647	1;1;1;1;1	1;1;1;1;1	1;1;1;1;1	tr|A0A1B0GTU9|A0A1B0GTU9_HUMAN Isoform of O14647, Chromodomain-helicase-DNA-binding protein 2 (Fragment) OS=Homo sapiens OX=9606 GN=CHD2 PE=1 SV=1;sp|O14646-2|CHD1-2_HUMAN Isoform of O14646, Isoform 2 of Chromodomain-helicase-DNA-binding protein 1 OS=Homo	5	1	1	1	0	1	0	0	0	1	0	0	0	1	0	0	0	0	0	110.15	954	954;1709;1710;1739;1828	0.0086393	1.534	1.1483	0.95005	NaN	1	0	Median	NaN	1.1483	NaN	NaN	NaN	0.95005	NaN	NaN
UBAP2L	Ubiquitin-associated protein 2-like	1.1285	0.94732	0.96507	NaN	F8W726;Q14157-4;Q14157-1;Q14157-3;Q14157;Q14157-5;Q5VU77;H0Y5H6;H7C2T8	F8W726;Q14157-4;Q14157-1;Q14157-3;Q14157;Q14157-5	4;4;4;4;4;4;1;1;1	4;4;4;4;4;4;1;1;1	4;4;4;4;4;4;1;1;1	tr|F8W726|F8W726_HUMAN Isoform of Q14157, Ubiquitin-associated protein 2-like OS=Homo sapiens OX=9606 GN=UBAP2L PE=1 SV=2;sp|Q14157-4|UBP2L-4_HUMAN Isoform of Q14157, Isoform 4 of Ubiquitin-associated protein 2-like OS=Homo sapiens OX=9606 GN=UBAP2L PE=1 S	9	4	4	4	1	2	4	0	1	2	4	0	1	2	4	0	6.6	6.6	6.6	113.63	1079	1079;976;983;1068;1087;1104;350;383;399	0	5.9632	0.681	0.98264	25.745	6	3	Median	1.2226	0.88472	0.61633	NaN	1.1285	0.94732	0.96507	NaN
GBAS	Protein NipSnap homolog 2	1.1459	0.9444	NaN	NaN	O75323;C9J7B1;C9K068;H7C333;O75323-2	O75323;C9J7B1;C9K068;H7C333;O75323-2	2;1;1;1;1	2;1;1;1;1	2;1;1;1;1	sp|O75323|NIPS2_HUMAN Protein NipSnap homolog 2 OS=Homo sapiens OX=9606 GN=NIPSNAP2 PE=1 SV=1;tr|C9J7B1|C9J7B1_HUMAN Isoform of O75323, Protein NipSnap homolog 2 (Fragment) OS=Homo sapiens OX=9606 GN=NIPSNAP2 PE=1 SV=1;tr|C9K068|C9K068_HUMAN Isoform of O75	5	2	2	2	1	2	0	0	1	2	0	0	1	2	0	0	5.9	5.9	5.9	33.742	286	286;65;80;114;247	0.0063174	1.7302	1.1763	0.9662	11.395	3	0	Median	1.132	1.1938	NaN	NaN	1.1459	0.9444	NaN	NaN
VWA9	von Willebrand factor A domain-containing protein 9	0.94106	0.94314	0.73142	NaN	H3BRY6;B4DVT3;B4DJL6;Q96SY0-4;Q96SY0-3;Q96SY0	H3BRY6;B4DVT3;B4DJL6;Q96SY0-4;Q96SY0-3;Q96SY0	1;1;1;1;1;1	1;1;1;1;1;1	1;1;1;1;1;1	tr|H3BRY6|H3BRY6_HUMAN Isoform of Q96SY0, Integrator complex subunit 14 OS=Homo sapiens OX=9606 GN=INTS14 PE=1 SV=1;tr|B4DVT3|B4DVT3_HUMAN Isoform of Q96SY0, Integrator complex subunit 14 OS=Homo sapiens OX=9606 GN=INTS14 PE=1 SV=1;tr|B4DJL6|B4DJL6_HUMAN I	6	1	1	1	1	1	1	0	1	1	1	0	1	1	1	0	3.2	3.2	3.2	51.583	468	468;482;554;439;461;518	0.0041369	1.8547	0.89442	0.94106	14.615	3	1	Median	0.98277	0.89442	0.55378	NaN	0.94106	0.94314	0.73142	NaN
ARPC5L	Actin-related protein 2/3 complex subunit 5-like protein	1.0404	0.94153	1.2141	NaN	Q9BPX5	Q9BPX5	2	2	2	sp|Q9BPX5|ARP5L_HUMAN Actin-related protein 2/3 complex subunit 5-like protein OS=Homo sapiens OX=9606 GN=ARPC5L PE=1 SV=1	1	2	2	2	2	2	1	0	2	2	1	0	2	2	1	0	16.3	16.3	16.3	16.941	153	153	0	5.767	1.0352	1.107	7.5065	5	0	Leave out requantified	1.0459	1.1525	0.6719	NaN	1.0404	0.94153	1.2141	NaN
IPO8	Importin-8	0.89916	0.93991	1.0865	NaN	O15397;O15397-2;F5H2I3	O15397;O15397-2	3;2;1	2;1;1	2;1;1	sp|O15397|IPO8_HUMAN Importin-8 OS=Homo sapiens OX=9606 GN=IPO8 PE=1 SV=2;sp|O15397-2|IPO8-2_HUMAN Isoform of O15397, Isoform 2 of Importin-8 OS=Homo sapiens OX=9606 GN=IPO8 PE=1 SV=2	3	3	2	2	3	1	3	1	2	1	2	1	2	1	2	1	3.2	2.2	2.2	119.94	1037	1037;832;46	0.00081037	2.3931	0.89386	0.93991	13.069	5	2	Median	0.97906	0.89386	0.72413	NaN	0.89916	0.93991	1.0865	NaN
MRPL20	39S ribosomal protein L20, mitochondrial	1.0373	0.93896	NaN	NaN	I3L2X1;Q9BYC9;Q9BYC9-2	I3L2X1;Q9BYC9;Q9BYC9-2	1;1;1	1;1;1	1;1;1	tr|I3L2X1|I3L2X1_HUMAN Isoform of Q9BYC9, 39S ribosomal protein L20, mitochondrial (Fragment) OS=Homo sapiens OX=9606 GN=MRPL20 PE=1 SV=1;sp|Q9BYC9|RM20_HUMAN 39S ribosomal protein L20, mitochondrial OS=Homo sapiens OX=9606 GN=MRPL20 PE=1 SV=1;sp|Q9BYC9-2|	3	1	1	1	1	1	0	0	1	1	0	0	1	1	0	0	16.7	16.7	16.7	7.5961	66	66;149;155	0.0023292	2.0561	1.1537	0.98692	7.0452	2	0	Median	1.0654	1.2493	NaN	NaN	1.0373	0.93896	NaN	NaN
HSP90AB4P	Putative heat shock protein HSP 90-beta 4	1.0499	0.93828	NaN	NaN	Q58FF6	Q58FF6	7	1	1	sp|Q58FF6|H90B4_HUMAN Putative heat shock protein HSP 90-beta 4 OS=Homo sapiens OX=9606 GN=HSP90AB4P PE=5 SV=1	1	7	1	1	6	5	5	5	1	1	0	0	1	1	0	0	10.1	2.2	2.2	58.264	505	505	0.0073421	1.6374	1.0257	0.99253	7.9489	2	0	Median	1.1649	0.90311	NaN	NaN	1.0499	0.93828	NaN	NaN
FPGS	Folylpolyglutamate synthase, mitochondrial	1.371	0.93803	NaN	NaN	Q05932-3;Q05932-2;Q05932-4;Q05932;Q5JU21;Q5JU20;Q5JU23	Q05932-3;Q05932-2;Q05932-4;Q05932;Q5JU21;Q5JU20;Q5JU23	2;2;2;2;1;1;1	2;2;2;2;1;1;1	2;2;2;2;1;1;1	sp|Q05932-3|FOLC-3_HUMAN Isoform of Q05932, Isoform 3 of Folylpolyglutamate synthase, mitochondrial OS=Homo sapiens OX=9606 GN=FPGS PE=1 SV=3;sp|Q05932-2|FOLC-2_HUMAN Isoform of Q05932, Isoform 2 of Folylpolyglutamate synthase, mitochondrial OS=Homo sapien	7	2	2	2	1	2	0	0	1	2	0	0	1	2	0	0	5.6	5.6	5.6	59.173	537	537;545;561;587;194;264;375	0.0063127	1.7153	0.8563	0.98458	22.441	3	1	Median	1.502	0.8519	NaN	NaN	1.371	0.93803	NaN	NaN
LRRFIP1	Leucine-rich repeat flightless-interacting protein 1	1.1557	0.93137	1.4113	NaN	Q32MZ4-3;Q32MZ4-2;Q32MZ4	Q32MZ4-3;Q32MZ4-2;Q32MZ4	4;4;4	4;4;4	4;4;4	sp|Q32MZ4-3|LRRF1-3_HUMAN Isoform of Q32MZ4, Isoform 3 of Leucine-rich repeat flightless-interacting protein 1 OS=Homo sapiens OX=9606 GN=LRRFIP1 PE=1 SV=2;sp|Q32MZ4-2|LRRF1-2_HUMAN Isoform of Q32MZ4, Isoform 2 of Leucine-rich repeat flightless-interacting	3	4	4	4	2	1	4	1	2	1	4	1	2	1	4	1	8	8	8	82.688	752	752;784;808	0	13.328	0.9828	1.1933	12.591	5	1	Leave out requantified	1.2583	0.89234	0.90264	NaN	1.1557	0.93137	1.4113	NaN
SNX4	Sorting nexin-4	1.1736	0.93134	NaN	NaN	F8W9T3;O95219-2;O95219	F8W9T3;O95219-2;O95219	1;1;1	1;1;1	1;1;1	tr|F8W9T3|F8W9T3_HUMAN Isoform of O95219, Sorting nexin-4 (Fragment) OS=Homo sapiens OX=9606 GN=SNX4 PE=1 SV=1;sp|O95219-2|SNX4-2_HUMAN Isoform of O95219, Isoform 2 of Sorting nexin-4 OS=Homo sapiens OX=9606 GN=SNX4 PE=1 SV=1;sp|O95219|SNX4_HUMAN Sorting n	3	1	1	1	1	1	0	0	1	1	0	0	1	1	0	0	5.8	5.8	5.8	18.564	155	155;305;450	0.0072807	1.5998	1.0091	1.0455	16.35	2	0	Median	1.2275	0.82956	NaN	NaN	1.1736	0.93134	NaN	NaN
GIGYF2	PERQ amino acid-rich with GYF domain-containing protein 2	1.5388	0.92808	1.0657	NaN	Q6Y7W6-4;Q6Y7W6-5;Q6Y7W6;I1E4Y6;Q6Y7W6-3;E7ESB6;C9JHW1;C9JW88;F8WCD5;C9JPV7;C9JXQ0;C9J0V6;C9JHT0;C9JRZ2;C9JH18	Q6Y7W6-4;Q6Y7W6-5;Q6Y7W6;I1E4Y6;Q6Y7W6-3;E7ESB6;C9JHW1	7;7;7;6;6;5;4;2;2;2;2;2;2;2;1	7;7;7;6;6;5;4;2;2;2;2;2;2;2;1	7;7;7;6;6;5;4;2;2;2;2;2;2;2;1	sp|Q6Y7W6-4|GGYF2-4_HUMAN Isoform of Q6Y7W6, Isoform 3 of GRB10-interacting GYF protein 2 OS=Homo sapiens OX=9606 GN=GIGYF2 PE=1 SV=1;sp|Q6Y7W6-5|GGYF2-5_HUMAN Isoform of Q6Y7W6, Isoform 4 of GRB10-interacting GYF protein 2 OS=Homo sapiens OX=9606 GN=GIGYF	15	7	7	7	6	5	1	0	6	5	1	0	6	5	1	0	8.4	8.4	8.4	148.63	1286	1286;1293;1299;1321;1320;836;720;68;92;93;99;106;112;115;149	0	101.87	1.1822	1.1374	10.215	11	3	Leave out requantified	1.5825	0.90126	0.85575	NaN	1.5388	0.92808	1.0657	NaN
MAD1L1	Mitotic spindle assembly checkpoint protein MAD1	NaN	0.92731	NaN	NaN	Q9Y6D9-3;Q9Y6D9	Q9Y6D9-3;Q9Y6D9	1;1	1;1	1;1	sp|Q9Y6D9-3|MD1L1-3_HUMAN Isoform of Q9Y6D9, Isoform 2 of Mitotic spindle assembly checkpoint protein MAD1 OS=Homo sapiens OX=9606 GN=MAD1L1 PE=1 SV=2;sp|Q9Y6D9|MD1L1_HUMAN Mitotic spindle assembly checkpoint protein MAD1 OS=Homo sapiens OX=9606 GN=MAD1L1	2	1	1	1	0	1	0	0	0	1	0	0	0	1	0	0	1.9	1.9	1.9	72.286	626	626;718	0.0041462	1.8717	0.89035	0.92731	NaN	1	0	Median	NaN	0.89035	NaN	NaN	NaN	0.92731	NaN	NaN
LAS1L	Ribosomal biogenesis protein LAS1L	1.4428	0.92178	NaN	NaN	Q9Y4W2-2;Q9Y4W2;Q9Y4W2-4;Q9Y4W2-3	Q9Y4W2-2;Q9Y4W2;Q9Y4W2-4;Q9Y4W2-3	4;4;2;2	4;4;2;2	4;4;2;2	sp|Q9Y4W2-2|LAS1L-2_HUMAN Isoform of Q9Y4W2, Isoform 2 of Ribosomal biogenesis protein LAS1L OS=Homo sapiens OX=9606 GN=LAS1L PE=1 SV=2;sp|Q9Y4W2|LAS1L_HUMAN Ribosomal biogenesis protein LAS1L OS=Homo sapiens OX=9606 GN=LAS1L PE=1 SV=2;sp|Q9Y4W2-4|LAS1L-4_	4	4	4	4	2	4	0	0	2	4	0	0	2	4	0	0	7.8	7.8	7.8	81.242	717	717;734;291;675	0	19.46	1.0955	1.1424	12.786	6	2	Leave out requantified	1.5923	0.82979	NaN	NaN	1.4428	0.92178	NaN	NaN
FASTKD1	FAST kinase domain-containing protein 1	0.9815	0.92018	NaN	NaN	Q53R41-2;Q53R41	Q53R41-2;Q53R41	1;1	1;1	1;1	sp|Q53R41-2|FAKD1-2_HUMAN Isoform of Q53R41, Isoform 2 of FAST kinase domain-containing protein 1, mitochondrial OS=Homo sapiens OX=9606 GN=FASTKD1 PE=1 SV=1;sp|Q53R41|FAKD1_HUMAN FAST kinase domain-containing protein 1, mitochondrial OS=Homo sapiens OX=96	2	1	1	1	1	1	0	0	1	1	0	0	1	1	0	0	1.7	1.7	1.7	92.203	804	804;847	0	5.159	0.97668	0.95035	4.5612	2	0	Median	1.072	0.8898	NaN	NaN	0.9815	0.92018	NaN	NaN
SLU7	Pre-mRNA-splicing factor SLU7	NaN	0.91995	NaN	NaN	O95391	O95391	2	2	2	sp|O95391|SLU7_HUMAN Pre-mRNA-splicing factor SLU7 OS=Homo sapiens OX=9606 GN=SLU7 PE=1 SV=2	1	2	2	2	0	2	0	0	0	2	0	0	0	2	0	0	4.6	4.6	4.6	68.386	586	586	0	5.5271	0.84768	0.91995	NaN	1	0	Median	NaN	0.84768	NaN	NaN	NaN	0.91995	NaN	NaN
NDUFB10	NADH dehydrogenase [ubiquinone] 1 beta subcomplex subunit 10	0.93429	0.91911	0.78127	NaN	H3BV16;H3BPJ9;O96000-2;O96000	H3BV16;H3BPJ9;O96000-2;O96000	2;2;2;2	2;2;2;2	2;2;2;2	tr|H3BV16|H3BV16_HUMAN Isoform of O96000, NADH dehydrogenase [ubiquinone] 1 beta subcomplex subunit 10 (Fragment) OS=Homo sapiens OX=9606 GN=NDUFB10 PE=1 SV=8;tr|H3BPJ9|H3BPJ9_HUMAN Isoform of O96000, NADH dehydrogenase [ubiquinone] 1 beta subcomplex subun	4	2	2	2	2	1	1	0	2	1	1	0	2	1	1	0	18.3	18.3	18.3	17.385	142	142;161;168;172	0	4.019	0.93171	0.93125	1.856	4	0	Leave out requantified	0.93171	0.98978	0.62009	NaN	0.93429	0.91911	0.78127	NaN
NASP	Nuclear autoantigenic sperm protein	NaN	0.9081	1.2938	NaN	P49321;P49321-3;P49321-2;P49321-4;H0YDS9;Q5T624;E9PRH9;H0YF33;E9PPR5;E9PPQ8;E9PI86	P49321;P49321-3;P49321-2;P49321-4;H0YDS9;Q5T624	5;5;4;4;3;3;2;2;2;1;1	5;5;4;4;3;3;2;2;2;1;1	5;5;4;4;3;3;2;2;2;1;1	sp|P49321|NASP_HUMAN Nuclear autoantigenic sperm protein OS=Homo sapiens OX=9606 GN=NASP PE=1 SV=2;sp|P49321-3|NASP-3_HUMAN Isoform of P49321, Isoform 3 of Nuclear autoantigenic sperm protein OS=Homo sapiens OX=9606 GN=NASP PE=1 SV=2;sp|P49321-2|NASP-2_HUM	11	5	5	5	0	1	5	0	0	1	5	0	0	1	5	0	9.5	9.5	9.5	85.237	788	788;790;449;724;175;422;268;288;316;154;256	0	6.474	0.86716	1.2938	12.777	5	0	Leave out requantified	NaN	0.83088	0.86716	NaN	NaN	0.9081	1.2938	NaN
EEA1	Early endosome antigen 1	0.93138	0.90666	1.1512	NaN	Q15075	Q15075	6	6	6	sp|Q15075|EEA1_HUMAN Early endosome antigen 1 OS=Homo sapiens OX=9606 GN=EEA1 PE=1 SV=2	1	6	6	6	4	1	3	1	4	1	3	1	4	1	3	1	6.7	6.7	6.7	162.46	1411	1411	0	28.391	0.87516	1.0801	11.41	7	1	Leave out requantified	1.0095	0.84787	0.74046	NaN	0.93138	0.90666	1.1512	NaN
TTI2	TELO2-interacting protein 2	1.0337	0.90607	0.73573	NaN	E5RIH5;Q6NXR4	E5RIH5;Q6NXR4	1;1	1;1	1;1	tr|E5RIH5|E5RIH5_HUMAN Isoform of Q6NXR4, TELO2-interacting protein 2 OS=Homo sapiens OX=9606 GN=TTI2 PE=1 SV=1;sp|Q6NXR4|TTI2_HUMAN TELO2-interacting protein 2 OS=Homo sapiens OX=9606 GN=TTI2 PE=1 SV=1	2	1	1	1	1	1	1	0	1	1	1	0	1	1	1	0	2.1	2.1	2.1	53.305	477	477;508	0.0045028	1.837	0.85997	0.90607	17.145	3	0	Median	1.1279	0.85997	0.54708	NaN	1.0337	0.90607	0.73573	NaN
		NaN	0.9047	NaN	NaN	REV__H0Y3R4;REV__Q9C0A6-2;REV__Q9C0A6-3;REV__Q9C0A6;REV__E7EWN3	REV__H0Y3R4;REV__Q9C0A6-2;REV__Q9C0A6-3;REV__Q9C0A6;REV__E7EWN3	1;1;1;1;1	1;1;1;1;1	1;1;1;1;1	tr|H0Y3R4|H0Y3R4_HUMAN Isoform of Q9C0A6, Histone-lysine N-methyltransferase SETD5 (Fragment) OS=Homo sapiens OX=9606 GN=SETD5 PE=1 SV=1;sp|Q9C0A6-2|SETD5-2_HUMAN Isoform of Q9C0A6, Isoform 2 of Histone-lysine N-methyltransferase SETD5 OS=Homo sapiens OX=9	5	1	1	1	0	1	0	0	0	1	0	0	0	1	0	0	0	0	0	99.71	911	911;1331;1344;1442;1461	1	-2	0.87802	0.9047	NaN	1	0	Median	NaN	0.87802	NaN	NaN	NaN	0.9047	NaN	NaN
POLR2L	DNA-directed RNA polymerases I, II, and III subunit RPABC5	1.0035	0.90314	0.34826	NaN	P62875	P62875	2	2	2	sp|P62875|RPAB5_HUMAN DNA-directed RNA polymerases I, II, and III subunit RPABC5 OS=Homo sapiens OX=9606 GN=POLR2L PE=1 SV=1	1	2	2	2	2	1	1	0	2	1	1	0	2	1	1	0	29.9	29.9	29.9	7.645	67	67	0	3.9982	0.44334	0.58256	58.55	4	0	Median	1.0132	0.98731	0.18432	NaN	1.0035	0.90314	0.34826	NaN
GPN2	GPN-loop GTPase 2	0.7709	0.89663	NaN	NaN	Q5JYG4;Q9H9Y4	Q5JYG4;Q9H9Y4	1;1	1;1	1;1	tr|Q5JYG4|Q5JYG4_HUMAN Isoform of Q9H9Y4, GPN-loop GTPase 2 OS=Homo sapiens OX=9606 GN=GPN2 PE=1 SV=2;sp|Q9H9Y4|GPN2_HUMAN GPN-loop GTPase 2 OS=Homo sapiens OX=9606 GN=GPN2 PE=1 SV=2	2	1	1	1	1	1	0	0	1	1	0	0	1	1	0	0	18.8	18.8	18.8	11.751	112	112;310	0	4.0265	0.92065	0.83139	10.684	2	1	Median	0.82438	1.0282	NaN	NaN	0.7709	0.89663	NaN	NaN
MTERF1	Transcription termination factor 1, mitochondrial	0.94246	0.89539	0.93728	NaN	C9JNM8;C9JE25;B4DPR9;Q99551	C9JNM8;C9JE25;B4DPR9;Q99551	1;1;1;1	1;1;1;1	1;1;1;1	tr|C9JNM8|C9JNM8_HUMAN Isoform of Q99551, Transcription termination factor 1, mitochondrial (Fragment) OS=Homo sapiens OX=9606 GN=MTERF1 PE=1 SV=1;tr|C9JE25|C9JE25_HUMAN Isoform of Q99551, Transcription termination factor 1, mitochondrial (Fragment) OS=Hom	4	1	1	1	1	1	1	0	1	1	1	0	1	1	1	0	6.5	6.5	6.5	16.232	139	139;158;379;399	0.00080841	2.3797	0.75665	0.94246	2.8124	3	0	Plateau	0.97148	0.75665	0.58428	NaN	0.94246	0.89539	0.93728	NaN
MRPS30	28S ribosomal protein S30, mitochondrial	1.1265	0.89536	NaN	NaN	Q9NP92	Q9NP92	2	2	2	sp|Q9NP92|RT30_HUMAN 39S ribosomal protein S30, mitochondrial OS=Homo sapiens OX=9606 GN=MRPS30 PE=1 SV=2	1	2	2	2	1	1	0	0	1	1	0	0	1	1	0	0	5.5	5.5	5.5	50.364	439	439	0.0023392	2.0936	0.95209	1.0043	16.237	2	1	Median	1.1764	0.77055	NaN	NaN	1.1265	0.89536	NaN	NaN
CPSF7	Cleavage and polyadenylation specificity factor subunit 7	NaN	0.89457	0.8045	NaN	Q8N684-2;Q8N684;Q8N684-3;F5H669;F5H6M0;F5H047;J3QT54;F5H5B7;F5H1W4;F5H2K8;F5H6P5;F5H6A8;F5GXA3;C9JM38;C9J286;C9J323	Q8N684-2;Q8N684;Q8N684-3;F5H669	7;7;7;6;3;3;2;1;1;1;1;1;1;1;1;1	7;7;7;6;3;3;2;1;1;1;1;1;1;1;1;1	7;7;7;6;3;3;2;1;1;1;1;1;1;1;1;1	sp|Q8N684-2|CPSF7-2_HUMAN Isoform of Q8N684, Isoform 2 of Cleavage and polyadenylation specificity factor subunit 7 OS=Homo sapiens OX=9606 GN=CPSF7 PE=1 SV=1;sp|Q8N684|CPSF7_HUMAN Cleavage and polyadenylation specificity factor subunit 7 OS=Homo sapiens O	16	7	7	7	1	2	5	0	1	2	5	0	1	2	5	0	17.5	17.5	17.5	51.095	462	462;471;514;374;219;288;204;93;98;100;101;101;102;138;143;145	0	10.614	0.73613	0.89199	17.154	6	2	Leave out requantified	NaN	0.79264	0.59264	NaN	NaN	0.89457	0.8045	NaN
VCL	Vinculin	0.96197	0.89398	1.3761	NaN	P18206;P18206-2;P18206-3	P18206;P18206-2	4;4;1	4;4;1	4;4;1	sp|P18206|VINC_HUMAN Vinculin OS=Homo sapiens OX=9606 GN=VCL PE=1 SV=4;sp|P18206-2|VINC-2_HUMAN Isoform of P18206, Isoform 1 of Vinculin OS=Homo sapiens OX=9606 GN=VCL PE=1 SV=4	3	4	4	4	3	1	2	0	3	1	2	0	3	1	2	0	4.3	4.3	4.3	123.8	1134	1134;1066;222	0	6.0981	0.90201	0.99145	30.557	6	0	Leave out requantified	1.0543	0.85283	0.89812	NaN	0.96197	0.89398	1.3761	NaN
MSTO1	Protein misato homolog 1	0.61155	0.89395	NaN	NaN	A0A3B3IUD2;Q9BUK6-5;Q9BUK6-7;Q9BUK6-3;Q9BUK6-2;Q9BUK6	A0A3B3IUD2;Q9BUK6-5;Q9BUK6-7;Q9BUK6-3;Q9BUK6-2;Q9BUK6	2;2;2;2;2;2	2;2;2;2;2;2	2;2;2;2;2;2	tr|A0A3B3IUD2|A0A3B3IUD2_HUMAN Isoform of Q9BUK6, Protein misato homolog 1 OS=Homo sapiens OX=9606 GN=MSTO1 PE=1 SV=1;sp|Q9BUK6-5|MSTO1-5_HUMAN Isoform of Q9BUK6, Isoform 5 of Protein misato homolog 1 OS=Homo sapiens OX=9606 GN=MSTO1 PE=1 SV=1;sp|Q9BUK6-7|	6	2	2	2	1	1	0	0	1	1	0	0	1	1	0	0	4.7	4.7	4.7	60.645	557	557;391;524;558;569;570	0.00083091	2.5777	0.73027	0.73939	26.846	2	0	Median	0.65979	0.80828	NaN	NaN	0.61155	0.89395	NaN	NaN
SETD1A	Histone-lysine N-methyltransferase SETD1A	0.97252	0.89372	0.51857	NaN	O15047	O15047	2	2	2	sp|O15047|SET1A_HUMAN Histone-lysine N-methyltransferase SETD1A OS=Homo sapiens OX=9606 GN=SETD1A PE=1 SV=3	1	2	2	2	2	1	1	1	2	1	1	1	2	1	1	1	1.7	1.7	1.7	186.03	1707	1707	0	3.8545	0.71533	0.81367	29.034	4	0	Leave out requantified	0.99378	0.79568	0.3332	NaN	0.97252	0.89372	0.51857	NaN
BTAF1	TATA-binding protein-associated factor 172	NaN	0.89333	0.91585	NaN	A0A0A0MTH9;O14981;O14981-2	A0A0A0MTH9;O14981;O14981-2	2;2;1	2;2;1	2;2;1	tr|A0A0A0MTH9|A0A0A0MTH9_HUMAN Isoform of O14981, TATA-binding protein-associated factor 172 OS=Homo sapiens OX=9606 GN=BTAF1 PE=1 SV=1;sp|O14981|BTAF1_HUMAN TATA-binding protein-associated factor 172 OS=Homo sapiens OX=9606 GN=BTAF1 PE=1 SV=2;sp|O14981-2|	3	2	2	2	0	1	2	0	0	1	2	0	0	1	2	0	1.1	1.1	1.1	206.93	1849	1849;1849;677	0	6.388	0.66007	0.89333	12.101	3	0	Median	NaN	0.85043	0.59008	NaN	NaN	0.89333	0.91585	NaN
ZCCHC6	Terminal uridylyltransferase 7	1.0024	0.89088	1.0257	NaN	Q5VYS8;Q5VYS8-6;X6R3Q3;Q5VYS8-4;Q5VYT0;Q5VYS8-3;Q5VYS8-2	Q5VYS8;Q5VYS8-6;X6R3Q3;Q5VYS8-4	4;3;2;2;1;1;1	4;3;2;2;1;1;1	4;3;2;2;1;1;1	sp|Q5VYS8|TUT7_HUMAN Terminal uridylyltransferase 7 OS=Homo sapiens OX=9606 GN=TUT7 PE=1 SV=1;sp|Q5VYS8-6|TUT7-6_HUMAN Isoform of Q5VYS8, Isoform 6 of Terminal uridylyltransferase 7 OS=Homo sapiens OX=9606 GN=TUT7 PE=1 SV=1;tr|X6R3Q3|X6R3Q3_HUMAN Isoform o	7	4	4	4	1	1	2	0	1	1	2	0	1	1	2	0	4.1	4.1	4.1	171.23	1495	1495;1457;784;1259;124;544;615	0	3.5121	0.84246	1.0024	7.5607	3	0	Leave out requantified	1.0741	0.84246	0.79312	NaN	1.0024	0.89088	1.0257	NaN
BZW1	Basic leucine zipper and W2 domain-containing protein 1	1.5729	0.88586	0.91166	NaN	Q7L1Q6-2;Q7L1Q6;Q7L1Q6-4;Q7L1Q6-3;C9IZ80;H0Y503;C9JFN4	Q7L1Q6-2;Q7L1Q6;Q7L1Q6-4;Q7L1Q6-3;C9IZ80	4;4;4;4;3;1;1	4;4;4;4;3;1;1	3;3;3;3;3;1;1	sp|Q7L1Q6-2|BZW1-2_HUMAN Isoform of Q7L1Q6, Isoform 2 of Basic leucine zipper and W2 domain-containing protein 1 OS=Homo sapiens OX=9606 GN=BZW1 PE=1 SV=1;sp|Q7L1Q6|BZW1_HUMAN Basic leucine zipper and W2 domain-containing protein 1 OS=Homo sapiens OX=9606	7	4	4	3	3	1	3	0	3	1	3	0	2	0	3	0	10.8	10.8	8.8	40.538	353	353;419;423;451;294;135;216	0	5.7815	0.98968	1.1915	63.387	7	0	Leave out requantified	1.6686	0.92923	0.74535	NaN	1.5729	0.88586	0.91166	NaN
PEBP4	Phosphatidylethanolamine-binding protein 4	NaN	0.88454	NaN	NaN	Q96S96	Q96S96	1	1	1	sp|Q96S96|PEBP4_HUMAN Phosphatidylethanolamine-binding protein 4 OS=Homo sapiens OX=9606 GN=PEBP4 PE=1 SV=3	1	1	1	1	0	1	0	0	0	1	0	0	0	1	0	0	9.7	9.7	9.7	25.733	227	227	0.0008058	2.3524	0.84098	0.88454	NaN	1	0	Median	NaN	0.84098	NaN	NaN	NaN	0.88454	NaN	NaN
AAAS	Aladin	1.1554	0.88108	0.98812	NaN	F8VZ44;Q9NRG9;H3BU82;Q9NRG9-2	F8VZ44;Q9NRG9;H3BU82;Q9NRG9-2	2;2;1;1	2;2;1;1	2;2;1;1	tr|F8VZ44|F8VZ44_HUMAN Isoform of Q9NRG9, Aladin OS=Homo sapiens OX=9606 GN=AAAS PE=1 SV=1;sp|Q9NRG9|AAAS_HUMAN Aladin OS=Homo sapiens OX=9606 GN=AAAS PE=1 SV=1;tr|H3BU82|H3BU82_HUMAN Isoform of Q9NRG9, Aladin (Fragment) OS=Homo sapiens OX=9606 GN=AAAS PE=	4	2	2	2	1	2	1	0	1	2	1	0	1	2	1	0	6.2	6.2	6.2	45.634	422	422;546;358;513	0	4.4545	0.7765	0.88108	33.494	4	0	Leave out requantified	1.2763	0.7765	0.69783	NaN	1.1554	0.88108	0.98812	NaN
SYPL1	Synaptophysin-like protein 1	1.5669	0.87853	0.61805	NaN	A0A0U1RQT9;C9JYN0;Q16563-2;Q16563	A0A0U1RQT9;C9JYN0;Q16563-2;Q16563	1;1;1;1	1;1;1;1	1;1;1;1	tr|A0A0U1RQT9|A0A0U1RQT9_HUMAN Isoform of Q16563, Synaptophysin-like protein 1 (Fragment) OS=Homo sapiens OX=9606 GN=SYPL1 PE=1 SV=1;tr|C9JYN0|C9JYN0_HUMAN Isoform of Q16563, Synaptophysin-like protein 1 OS=Homo sapiens OX=9606 GN=SYPL1 PE=1 SV=1;sp|Q16563	4	1	1	1	1	1	1	0	1	1	1	0	1	1	1	0	8.1	8.1	8.1	14.967	135	135;224;241;259	0.0019936	2.284	0.8355	0.87853	46.975	3	0	Median	1.6332	0.8355	0.3784	NaN	1.5669	0.87853	0.61805	NaN
FOXK1	Forkhead box protein K1	NaN	0.87774	NaN	NaN	P85037-2;P85037	P85037-2;P85037	1;1	1;1	1;1	sp|P85037-2|FOXK1-2_HUMAN Isoform of P85037, Isoform 2 of Forkhead box protein K1 OS=Homo sapiens OX=9606 GN=FOXK1 PE=1 SV=1;sp|P85037|FOXK1_HUMAN Forkhead box protein K1 OS=Homo sapiens OX=9606 GN=FOXK1 PE=1 SV=1	2	1	1	1	0	1	0	0	0	1	0	0	0	1	0	0	5.1	5.1	5.1	59.701	570	570;733	0	4.1616	0.79603	0.87774	NaN	1	1	Median	NaN	0.79603	NaN	NaN	NaN	0.87774	NaN	NaN
HAUS5	HAUS augmin-like complex subunit 5	1.0521	0.87432	1.2616	NaN	O94927;O94927-2;K7EQ61	O94927;O94927-2	4;2;1	4;2;1	4;2;1	sp|O94927|HAUS5_HUMAN HAUS augmin-like complex subunit 5 OS=Homo sapiens OX=9606 GN=HAUS5 PE=1 SV=2;sp|O94927-2|HAUS5-2_HUMAN Isoform of O94927, Isoform 2 of HAUS augmin-like complex subunit 5 OS=Homo sapiens OX=9606 GN=HAUS5 PE=1 SV=2	3	4	4	4	2	2	2	0	2	2	2	0	2	2	2	0	6.8	6.8	6.8	71.682	633	633;290;168	0	12.781	0.92318	1.0521	24.994	6	0	Leave out requantified	1.1303	0.81662	0.85763	NaN	1.0521	0.87432	1.2616	NaN
SMAD3	Mothers against decapentaplegic homolog 3	1.6002	0.87232	0.4458	NaN	P84022	P84022	3	1	1	sp|P84022|SMAD3_HUMAN Mothers against decapentaplegic homolog 3 OS=Homo sapiens OX=9606 GN=SMAD3 PE=1 SV=1	1	3	1	1	2	2	2	1	1	1	1	0	1	1	1	0	8.5	2.8	2.8	48.08	425	425	0.0019944	2.2855	0.84332	0.87232	63.928	3	0	Median	1.6596	0.84332	0.38292	NaN	1.6002	0.87232	0.4458	NaN
NDUFA4	Cytochrome c oxidase subunit NDUFA4	1.0431	0.87216	0.78038	NaN	O00483	O00483	2	2	2	sp|O00483|NDUA4_HUMAN Cytochrome c oxidase subunit NDUFA4 OS=Homo sapiens OX=9606 GN=NDUFA4 PE=1 SV=1	1	2	2	2	1	1	1	0	1	1	1	0	1	1	1	0	27.2	27.2	27.2	9.3697	81	81	0.00042699	2.8923	0.95344	0.87216	14.639	3	0	Median	1.0571	0.95344	0.46308	NaN	1.0431	0.87216	0.78038	NaN
KIF22	Kinesin-like protein;Kinesin-like protein KIF22	NaN	0.86862	NaN	NaN	H3BRB3;Q14807-2;Q14807	H3BRB3;Q14807-2;Q14807	1;1;1	1;1;1	1;1;1	tr|H3BRB3|H3BRB3_HUMAN Isoform of Q14807, Kinesin-like protein OS=Homo sapiens OX=9606 GN=KIF22 PE=1 SV=1;sp|Q14807-2|KIF22-2_HUMAN Isoform of Q14807, Isoform 2 of Kinesin-like protein KIF22 OS=Homo sapiens OX=9606 GN=KIF22 PE=1 SV=5;sp|Q14807|KIF22_HUMAN	3	1	1	1	0	1	0	0	0	1	0	0	0	1	0	0	2.8	2.8	2.8	67.752	611	611;597;665	0.0086238	1.5218	0.83284	0.86862	NaN	1	1	Median	NaN	0.83284	NaN	NaN	NaN	0.86862	NaN	NaN
R3HCC1	R3H and coiled-coil domain-containing protein 1	1.0803	0.86675	1.3934	NaN	A0A0D9SF44;A0A0R4J2E2;Q9Y3T6-3;Q9Y3T6;H0YBU3;A0A0D9SG39;E5RHX3;E5RIQ4	A0A0D9SF44;A0A0R4J2E2;Q9Y3T6-3;Q9Y3T6;H0YBU3;A0A0D9SG39;E5RHX3;E5RIQ4	2;2;2;2;1;1;1;1	2;2;2;2;1;1;1;1	2;2;2;2;1;1;1;1	tr|A0A0D9SF44|A0A0D9SF44_HUMAN Isoform of Q9Y3T6, R3H and coiled-coil domain-containing protein 1 OS=Homo sapiens OX=9606 GN=R3HCC1 PE=1 SV=1;tr|A0A0R4J2E2|A0A0R4J2E2_HUMAN Isoform of Q9Y3T6, R3H and coiled-coil domain-containing protein 1 OS=Homo sapiens	8	2	2	2	2	1	1	0	2	1	1	0	2	1	1	0	6	6	6	44.294	398	398;440;398;440;148;201;223;283	0	4.3729	1.1313	1.0803	3.3942	4	0	Leave out requantified	1.1674	0.82794	1.1114	NaN	1.0803	0.86675	1.3934	NaN
CNIH4	Protein cornichon homolog 4	NaN	0.86512	0.93161	NaN	A6NLH6;Q9P003	A6NLH6;Q9P003	1;1	1;1	1;1	tr|A6NLH6|A6NLH6_HUMAN Isoform of Q9P003, Protein cornichon homolog 4 OS=Homo sapiens OX=9606 GN=CNIH4 PE=1 SV=1;sp|Q9P003|CNIH4_HUMAN Protein cornichon homolog 4 OS=Homo sapiens OX=9606 GN=CNIH4 PE=1 SV=1	2	1	1	1	0	1	1	0	0	1	1	0	0	1	1	0	14.6	14.6	14.6	15.771	137	137;139	1	-2	0.74017	0.89775	5.236	2	0	Median	NaN	1.0939	0.50084	NaN	NaN	0.86512	0.93161	NaN
ARAP3	Arf-GAP with Rho-GAP domain, ANK repeat and PH domain-containing protein 3	NaN	0.86377	NaN	NaN	G5E9Y3;Q8WWN8-2;Q8WWN8;Q05CH1	G5E9Y3;Q8WWN8-2;Q8WWN8;Q05CH1	2;2;2;1	2;2;2;1	2;2;2;1	tr|G5E9Y3|G5E9Y3_HUMAN Isoform of Q8WWN8, Arf-GAP with Rho-GAP domain, ANK repeat and PH domain-containing protein 3 OS=Homo sapiens OX=9606 GN=ARAP3 PE=1 SV=1;sp|Q8WWN8-2|ARAP3-2_HUMAN Isoform of Q8WWN8, Isoform 2 of Arf-GAP with Rho-GAP domain, ANK repea	4	2	2	2	0	2	0	0	0	2	0	0	0	2	0	0	1.8	1.8	1.8	151.14	1375	1375;1193;1544;473	0.0073584	1.6495	0.82833	0.86377	21	2	2	Median	NaN	0.82833	NaN	NaN	NaN	0.86377	NaN	NaN
HAUS3	HAUS augmin-like complex subunit 3	NaN	0.85703	0.99704	NaN	Q68CZ6-2;Q68CZ6	Q68CZ6-2;Q68CZ6	2;2	2;2	2;2	sp|Q68CZ6-2|HAUS3-2_HUMAN Isoform of Q68CZ6, Isoform 2 of HAUS augmin-like complex subunit 3 OS=Homo sapiens OX=9606 GN=HAUS3 PE=1 SV=1;sp|Q68CZ6|HAUS3_HUMAN HAUS augmin-like complex subunit 3 OS=Homo sapiens OX=9606 GN=HAUS3 PE=1 SV=1	2	2	2	2	0	1	1	0	0	1	1	0	0	1	1	0	4.1	4.1	4.1	56.384	489	489;603	0.0019928	2.2783	0.75447	0.92439	10.7	2	0	Median	NaN	0.82845	0.68709	NaN	NaN	0.85703	0.99704	NaN
DNMBP	Dynamin-binding protein	0.94951	0.85518	0.77838	NaN	Q6XZF7;A0A1C7CYY6;A0A1B0GTX1;Q6XZF7-2	Q6XZF7;A0A1C7CYY6;A0A1B0GTX1;Q6XZF7-2	4;2;2;2	4;2;2;2	4;2;2;2	sp|Q6XZF7|DNMBP_HUMAN Dynamin-binding protein OS=Homo sapiens OX=9606 GN=DNMBP PE=1 SV=1;tr|A0A1C7CYY6|A0A1C7CYY6_HUMAN Isoform of Q6XZF7, Dynamin-binding protein OS=Homo sapiens OX=9606 GN=DNMBP PE=1 SV=1;tr|A0A1B0GTX1|A0A1B0GTX1_HUMAN Isoform of Q6XZF7,	4	4	4	4	1	3	1	0	1	3	1	0	1	3	1	0	3.9	3.9	3.9	177.35	1577	1577;865;1209;823	0	5.5182	0.75951	0.87121	20.625	5	0	Leave out requantified	1.0105	0.83901	0.49797	NaN	0.94951	0.85518	0.77838	NaN
KIF4A	Chromosome-associated kinesin KIF4A	1.1055	0.85453	1.0469	NaN	O95239-2;O95239	O95239-2;O95239	4;4	4;4	4;4	sp|O95239-2|KIF4A-2_HUMAN Isoform of O95239, Isoform 2 of Chromosome-associated kinesin KIF4A OS=Homo sapiens OX=9606 GN=KIF4A PE=1 SV=3;sp|O95239|KIF4A_HUMAN Chromosome-associated kinesin KIF4A OS=Homo sapiens OX=9606 GN=KIF4A PE=1 SV=3	2	4	4	4	4	2	1	0	4	2	1	0	4	2	1	0	4.2	4.2	4.2	128.46	1127	1127;1232	0	47.435	1.1761	1.0824	4.4416	7	1	Leave out requantified	1.2038	0.80299	0.68538	NaN	1.1055	0.85453	1.0469	NaN
TUBGCP5	Gamma-tubulin complex component 5	0.81792	0.84974	1.2631	NaN	A0A0G2JQK7;A0A0G2JR45;A0A0G2JRG1;A0A0G2JQK2;A0A087WVL9;A0A0G2JQX1;A0A0G2JPW5;A0A0G2JSA7;A0A087X1Z1;Q96RT8-2;Q96RT8	A0A0G2JQK7;A0A0G2JR45;A0A0G2JRG1;A0A0G2JQK2;A0A087WVL9;A0A0G2JQX1;A0A0G2JPW5;A0A0G2JSA7;A0A087X1Z1;Q96RT8-2;Q96RT8	1;1;1;1;1;1;1;1;1;1;1	1;1;1;1;1;1;1;1;1;1;1	1;1;1;1;1;1;1;1;1;1;1	tr|A0A0G2JQK7|A0A0G2JQK7_HUMAN Isoform of Q96RT8, Gamma-tubulin complex component 5 (Fragment) OS=Homo sapiens OX=9606 GN=TUBGCP5 PE=1 SV=1;tr|A0A0G2JR45|A0A0G2JR45_HUMAN Isoform of Q96RT8, Gamma-tubulin complex component 5 (Fragment) OS=Homo sapiens OX=96	11	1	1	1	1	1	1	0	1	1	1	0	1	1	1	0	60.9	60.9	60.9	2.571	23	23;103;145;194;194;1024;1024;1026;1026;1024;1024	0	8.6787	0.85322	0.84974	24.063	3	2	Median	0.89925	0.7919	0.85322	NaN	0.81792	0.84974	1.2631	NaN
FAM129B	Niban-like protein 1	1.1683	0.84734	0.97676	NaN	Q96TA1-2;Q96TA1	Q96TA1-2;Q96TA1	2;2	2;2	2;2	sp|Q96TA1-2|NIBL1-2_HUMAN Isoform of Q96TA1, Isoform 2 of Niban-like protein 1 OS=Homo sapiens OX=9606 GN=FAM129B PE=1 SV=3;sp|Q96TA1|NIBL1_HUMAN Niban-like protein 1 OS=Homo sapiens OX=9606 GN=FAM129B PE=1 SV=3	2	2	2	2	2	1	2	1	2	1	2	1	2	1	2	1	3.3	3.3	3.3	82.682	733	733;746	0	4.0981	0.71553	0.97676	0.89503	5	1	Leave out requantified	1.2516	0.79926	0.638	NaN	1.1683	0.84734	0.97676	NaN
POLD2	DNA polymerase delta subunit 2	1.0431	0.84426	1.3543	NaN	F8W8R3;A0A087WWF6;P49005;C9IZD2;C9J8Z7;C9JLE1;C9JHC7;H7C1B3	F8W8R3;A0A087WWF6;P49005;C9IZD2;C9J8Z7;C9JLE1;C9JHC7	4;4;4;2;2;2;2;1	4;4;4;2;2;2;2;1	4;4;4;2;2;2;2;1	tr|F8W8R3|F8W8R3_HUMAN Isoform of P49005, DNA polymerase delta subunit 2 OS=Homo sapiens OX=9606 GN=POLD2 PE=1 SV=1;tr|A0A087WWF6|A0A087WWF6_HUMAN Isoform of P49005, DNA polymerase delta subunit 2 OS=Homo sapiens OX=9606 GN=POLD2 PE=1 SV=1;sp|P49005|DPOD2_	8	4	4	4	1	1	2	0	1	1	2	0	1	1	2	0	13	13	13	49.612	455	455;504;469;148;155;220;257;83	0	8.5112	0.94835	1.15	23.495	4	0	Leave out requantified	1.1056	0.73305	0.94835	NaN	1.0431	0.84426	1.3543	NaN
MRPL43	39S ribosomal protein L43, mitochondrial	NaN	0.84423	NaN	NaN	H0YBU8;H0Y6Y8;B1AL05;Q8N983-4;Q8N983-3;Q8N983-2;Q8N983;Q8N983-6;Q8N983-7	H0YBU8;H0Y6Y8;B1AL05;Q8N983-4;Q8N983-3;Q8N983-2;Q8N983;Q8N983-6;Q8N983-7	1;1;1;1;1;1;1;1;1	1;1;1;1;1;1;1;1;1	1;1;1;1;1;1;1;1;1	tr|H0YBU8|H0YBU8_HUMAN Isoform of Q8N983, 39S ribosomal protein L43, mitochondrial (Fragment) OS=Homo sapiens OX=9606 GN=MRPL43 PE=1 SV=1;tr|H0Y6Y8|H0Y6Y8_HUMAN Isoform of Q8N983, 39S ribosomal protein L43, mitochondrial (Fragment) OS=Homo sapiens OX=9606	9	1	1	1	1	1	0	0	1	1	0	0	1	1	0	0	7.4	7.4	7.4	16.567	148	148;169;184;159;164;202;215;235;261	0.0019826	2.2247	1.1351	0.84423	NaN	1	0	Median	NaN	1.1351	NaN	NaN	NaN	0.84423	NaN	NaN
PI4KA	Phosphatidylinositol 4-kinase alpha	1.1019	0.84328	0.92684	NaN	P42356	P42356	2	2	2	sp|P42356|PI4KA_HUMAN Phosphatidylinositol 4-kinase alpha OS=Homo sapiens OX=9606 GN=PI4KA PE=1 SV=4	1	2	2	2	2	1	1	0	2	1	1	0	2	1	1	0	1.1	1.1	1.1	236.83	2102	2102	0	4.341	1.0226	1.0889	22.788	4	0	Leave out requantified	1.1655	0.78089	0.66756	NaN	1.1019	0.84328	0.92684	NaN
DBT	Lipoamide acyltransferase component of branched-chain alpha-keto acid dehydrogenase complex, mitochondrial	NaN	0.84004	NaN	NaN	Q5VVL7;P11182	Q5VVL7;P11182	2;2	2;2	2;2	tr|Q5VVL7|Q5VVL7_HUMAN Isoform of P11182, Dihydrolipoamide acetyltransferase component of pyruvate dehydrogenase complex OS=Homo sapiens OX=9606 GN=DBT PE=1 SV=1;sp|P11182|ODB2_HUMAN Lipoamide acyltransferase component of branched-chain alpha-keto acid deh	2	2	2	2	0	2	0	0	0	2	0	0	0	2	0	0	6.6	6.6	6.6	36.238	320	320;482	0.00082508	2.5257	0.81022	0.84004	7.7594	2	0	Median	NaN	0.81022	NaN	NaN	NaN	0.84004	NaN	NaN
CDK7	Cyclin-dependent kinase 7	NaN	0.83977	NaN	NaN	D6REC6;D6R9G1;D6RAD4;P50613	D6REC6;D6R9G1;D6RAD4;P50613	2;2;2;2	2;2;2;2	2;2;2;2	tr|D6REC6|D6REC6_HUMAN Isoform of P50613, Cyclin-dependent kinase 7 (Fragment) OS=Homo sapiens OX=9606 GN=CDK7 PE=1 SV=1;tr|D6R9G1|D6R9G1_HUMAN Isoform of P50613, Cyclin-dependent kinase 7 OS=Homo sapiens OX=9606 GN=CDK7 PE=1 SV=1;tr|D6RAD4|D6RAD4_HUMAN Is	4	2	2	2	0	2	0	0	0	2	0	0	0	2	0	0	16.1	16.1	16.1	17	149	149;253;309;346	0.0019763	2.2061	0.81062	0.83977	8.1953	2	0	Median	NaN	0.81062	NaN	NaN	NaN	0.83977	NaN	NaN
WDHD1	WD repeat and HMG-box DNA-binding protein 1	1.2802	0.8363	0.85769	NaN	O75717-2;O75717	O75717-2;O75717	5;5	5;5	5;5	sp|O75717-2|WDHD1-2_HUMAN Isoform of O75717, Isoform 2 of WD repeat and HMG-box DNA-binding protein 1 OS=Homo sapiens OX=9606 GN=WDHD1 PE=1 SV=1;sp|O75717|WDHD1_HUMAN WD repeat and HMG-box DNA-binding protein 1 OS=Homo sapiens OX=9606 GN=WDHD1 PE=1 SV=1	2	5	5	5	3	2	2	0	3	2	2	0	3	2	2	0	7.1	7.1	7.1	112.7	1006	1006;1129	0	25.642	1.0538	1.1408	42.001	6	1	Leave out requantified	1.3941	0.77488	0.5609	NaN	1.2802	0.8363	0.85769	NaN
MAPRE1	Microtubule-associated protein RP/EB family member 1	1.3175	0.83628	1.1913	NaN	Q15691	Q15691	5	5	5	sp|Q15691|MARE1_HUMAN Microtubule-associated protein RP/EB family member 1 OS=Homo sapiens OX=9606 GN=MAPRE1 PE=1 SV=3	1	5	5	5	4	1	5	1	4	1	5	1	4	1	5	1	29.1	29.1	29.1	29.999	268	268	0	11.505	0.8998	1.0601	23.367	8	2	Leave out requantified	1.3686	1.0114	0.85436	NaN	1.3175	0.83628	1.1913	NaN
MRPL48	39S ribosomal protein L48, mitochondrial	1.8646	0.83614	1.5313	NaN	F5H702;Q96GC5-3;Q96GC5;F5H8D0	F5H702;Q96GC5-3;Q96GC5	3;3;3;1	3;3;3;1	3;3;3;1	tr|F5H702|F5H702_HUMAN Isoform of Q96GC5, 39S ribosomal protein L48, mitochondrial OS=Homo sapiens OX=9606 GN=MRPL48 PE=1 SV=1;sp|Q96GC5-3|RM48-3_HUMAN Isoform of Q96GC5, Isoform 2 of 39S ribosomal protein L48, mitochondrial OS=Homo sapiens OX=9606 GN=MRPL	4	3	3	3	1	2	2	0	1	2	2	0	1	2	2	0	31.9	31.9	31.9	12.77	113	113;194;212;121	0	16.701	1.0352	1.1724	37.773	4	0	Leave out requantified	1.9043	1.0352	0.77279	NaN	1.8646	0.83614	1.5313	NaN
AHR	Aryl hydrocarbon receptor	0.82578	0.83567	NaN	NaN	A0A1B0GVI7;A0A2R8Y7G1;P35869	A0A1B0GVI7;A0A2R8Y7G1;P35869	1;1;1	1;1;1	1;1;1	tr|A0A1B0GVI7|A0A1B0GVI7_HUMAN Uncharacterized protein (Fragment) OS=Homo sapiens OX=9606 PE=4 SV=1;tr|A0A2R8Y7G1|A0A2R8Y7G1_HUMAN Isoform of P35869, Aryl hydrocarbon receptor OS=Homo sapiens OX=9606 GN=AHR PE=1 SV=1;sp|P35869|AHR_HUMAN Aryl hydrocarbon re	3	1	1	1	1	1	0	0	1	1	0	0	1	1	0	0	1.8	1.8	1.8	90.58	797	797;833;848	0.0073719	1.6561	0.85793	0.83071	0.84221	2	0	Median	0.89216	0.82502	NaN	NaN	0.82578	0.83567	NaN	NaN
SAP30	Histone deacetylase complex subunit SAP30	NaN	0.83565	NaN	NaN	O75446	O75446	1	1	1	sp|O75446|SAP30_HUMAN Histone deacetylase complex subunit SAP30 OS=Homo sapiens OX=9606 GN=SAP30 PE=1 SV=1	1	1	1	1	0	1	0	0	0	1	0	0	0	1	0	0	5.5	5.5	5.5	23.306	220	220	0.0095915	1.4518	0.89374	0.83565	NaN	1	0	Median	NaN	0.89374	NaN	NaN	NaN	0.83565	NaN	NaN
RPP40	Ribonuclease P protein subunit p40	NaN	0.83519	0.51891	NaN	F8WC38;A0A087X1N3;O75818-2;O75818	F8WC38;A0A087X1N3;O75818-2;O75818	1;1;1;1	1;1;1;1	1;1;1;1	tr|F8WC38|F8WC38_HUMAN Isoform of O75818, Ribonuclease P protein subunit p40 OS=Homo sapiens OX=9606 GN=RPP40 PE=1 SV=1;tr|A0A087X1N3|A0A087X1N3_HUMAN Isoform of O75818, Ribonuclease P 40kDa subunit, isoform CRA_c OS=Homo sapiens OX=9606 GN=RPP40 PE=1 SV=1	4	1	1	1	0	1	1	0	0	1	1	0	0	1	1	0	11.5	11.5	11.5	13.491	113	113;321;340;363	0.00043253	3.0411	0.52345	0.65832	33.653	2	1	Median	NaN	0.84743	0.32333	NaN	NaN	0.83519	0.51891	NaN
LAD1	Ladinin-1	0.75327	0.83178	NaN	NaN	H0Y901;E9PDI4;O00515	H0Y901;E9PDI4;O00515	1;1;1	1;1;1	1;1;1	tr|H0Y901|H0Y901_HUMAN Isoform of O00515, Ladinin-1 (Fragment) OS=Homo sapiens OX=9606 GN=LAD1 PE=1 SV=1;tr|E9PDI4|E9PDI4_HUMAN Isoform of O00515, Ladinin-1 OS=Homo sapiens OX=9606 GN=LAD1 PE=1 SV=1;sp|O00515|LAD1_HUMAN Ladinin-1 OS=Homo sapiens OX=9606 GN	3	1	1	1	1	1	0	0	1	1	0	0	1	1	0	0	8.9	8.9	8.9	21.473	192	192;531;517	0.0019904	2.268	0.81046	0.79155	7.0103	2	0	Median	0.81755	0.80344	NaN	NaN	0.75327	0.83178	NaN	NaN
RINT1	RAD50-interacting protein 1	0.81601	0.83069	NaN	NaN	Q6NUQ1	Q6NUQ1	1	1	1	sp|Q6NUQ1|RINT1_HUMAN RAD50-interacting protein 1 OS=Homo sapiens OX=9606 GN=RINT1 PE=1 SV=1	1	1	1	1	1	1	0	0	1	1	0	0	1	1	0	0	1.5	1.5	1.5	90.631	792	792	0.0066741	1.7045	0.84935	0.82332	1.261	2	0	Median	0.90857	0.79399	NaN	NaN	0.81601	0.83069	NaN	NaN
MED16	Mediator of RNA polymerase II transcription subunit 16	1.341	0.82844	0.78769	NaN	A0A0J9YYC6;A0A0J9YXE6;A0A0J9YXA0;Q9Y2X0-2;Q9Y2X0-3;Q9Y2X0	A0A0J9YYC6;A0A0J9YXE6;A0A0J9YXA0;Q9Y2X0-2;Q9Y2X0-3;Q9Y2X0	1;1;1;1;1;1	1;1;1;1;1;1	1;1;1;1;1;1	tr|A0A0J9YYC6|A0A0J9YYC6_HUMAN Isoform of Q9Y2X0, Mediator of RNA polymerase II transcription subunit 16 (Fragment) OS=Homo sapiens OX=9606 GN=MED16 PE=1 SV=1;tr|A0A0J9YXE6|A0A0J9YXE6_HUMAN Isoform of Q9Y2X0, Mediator of RNA polymerase II transcription sub	6	1	1	1	1	1	1	0	1	1	1	0	1	1	1	0	3.9	3.9	3.9	51.351	461	461;480;497;841;860;877	0	7.3785	1.0528	1.054	29.371	3	1	Plateau	1.444	0.76754	0.55574	NaN	1.341	0.82844	0.78769	NaN
SLC4A7	Anion exchange protein;Sodium bicarbonate cotransporter 3	NaN	0.8199	NaN	NaN	H7C3C4;E9PFN4;C9JRP1;A0A0A0MST8;Q9Y6M7-11;Q9Y6M7-6;Q9Y6M7-8;Q9Y6M7;Q9Y6M7-12;Q9Y6M7-13;Q9Y6M7-9;Q9Y6M7-14;Q9Y6M7-2;Q9Y6M7-3;Q9Y6M7-4;Q9Y6M7-5;Q9Y6M7-10;Q9Y6M7-7	H7C3C4;E9PFN4;C9JRP1;A0A0A0MST8;Q9Y6M7-11;Q9Y6M7-6;Q9Y6M7-8;Q9Y6M7;Q9Y6M7-12;Q9Y6M7-13;Q9Y6M7-9;Q9Y6M7-14;Q9Y6M7-2;Q9Y6M7-3;Q9Y6M7-4;Q9Y6M7-5;Q9Y6M7-10;Q9Y6M7-7	1;1;1;1;1;1;1;1;1;1;1;1;1;1;1;1;1;1	1;1;1;1;1;1;1;1;1;1;1;1;1;1;1;1;1;1	1;1;1;1;1;1;1;1;1;1;1;1;1;1;1;1;1;1	tr|H7C3C4|H7C3C4_HUMAN Isoform of Q9Y6M7, Anion exchange protein (Fragment) OS=Homo sapiens OX=9606 GN=SLC4A7 PE=1 SV=1;tr|E9PFN4|E9PFN4_HUMAN Isoform of Q9Y6M7, Anion exchange protein OS=Homo sapiens OX=9606 GN=SLC4A7 PE=1 SV=1;tr|C9JRP1|C9JRP1_HUMAN Isof	18	1	1	1	0	1	0	0	0	1	0	0	0	1	0	0	1.4	1.4	1.4	89.843	801	801;1210;1051;1201;463;1131;1246;1214;1206;1135;1095;467;1090;1018;1000;800;574;1259	0.007326	1.6277	0.80828	0.8199	NaN	1	0	Median	NaN	0.80828	NaN	NaN	NaN	0.8199	NaN	NaN
CLPX	ATP-dependent Clp protease ATP-binding subunit clpX-like, mitochondrial	1.3014	0.81795	1.1633	NaN	O76031	O76031	4	4	4	sp|O76031|CLPX_HUMAN ATP-dependent Clp protease ATP-binding subunit clpX-like, mitochondrial OS=Homo sapiens OX=9606 GN=CLPX PE=1 SV=2	1	4	4	4	4	1	2	0	4	1	2	0	4	1	2	0	8.1	8.1	8.1	69.223	633	633	0	7.0009	1.0967	1.256	10.514	7	1	Leave out requantified	1.4543	0.77742	0.78727	NaN	1.3014	0.81795	1.1633	NaN
NDUFB9	NADH dehydrogenase [ubiquinone] 1 beta subcomplex subunit 9	1.611	0.81461	1.3514	NaN	A0A3B3IT57;E9PH64;E7EWZ0;E9PF49;Q9Y6M9	A0A3B3IT57;E9PH64;E7EWZ0;E9PF49;Q9Y6M9	1;1;1;1;1	1;1;1;1;1	1;1;1;1;1	tr|A0A3B3IT57|A0A3B3IT57_HUMAN Isoform of Q9Y6M9, NADH dehydrogenase [ubiquinone] 1 beta subcomplex subunit 9 OS=Homo sapiens OX=9606 GN=NDUFB9 PE=1 SV=1;tr|E9PH64|E9PH64_HUMAN Isoform of Q9Y6M9, NADH dehydrogenase [ubiquinone] 1 beta subcomplex subunit 9	5	1	1	1	1	1	1	0	1	1	1	0	1	1	1	0	10.1	10.1	10.1	17.16	138	138;168;178;221;179	0	11.362	1.0875	1.611	35.405	3	1	Plateau	1.6482	1.0875	0.77166	NaN	1.611	0.81461	1.3514	NaN
PPP6R2	Serine/threonine-protein phosphatase 6 regulatory subunit 2	0.89502	0.81295	NaN	NaN	T1ECW5;O75170-6;O75170-2;O75170-4;O75170-3;O75170-5;O75170	T1ECW5;O75170-6;O75170-2;O75170-4;O75170-3;O75170-5;O75170	1;1;1;1;1;1;1	1;1;1;1;1;1;1	1;1;1;1;1;1;1	tr|T1ECW5|T1ECW5_HUMAN Isoform of O75170, Serine/threonine-protein phosphatase 6 regulatory subunit 2 (Fragment) OS=Homo sapiens OX=9606 GN=PPP6R2 PE=1 SV=1;sp|O75170-6|PP6R2-6_HUMAN Isoform of O75170, Isoform 6 of Serine/threonine-protein phosphatase 6 re	7	1	1	1	1	1	0	0	1	1	0	0	1	1	0	0	2.5	2.5	2.5	72.856	685	685;905;927;932;933;959;966	0.00080678	2.3645	0.86217	0.853	6.8009	2	0	Median	0.93985	0.79092	NaN	NaN	0.89502	0.81295	NaN	NaN
EWSR1	RNA-binding protein EWS	1.1969	0.80886	1.2272	NaN	B0QYK0;Q01844-6;Q01844-3;Q01844;Q01844-5;H7BY36;A0A0D9SFL3;C9JGE3;Q01844-4;Q01844-2	B0QYK0;Q01844-6;Q01844-3;Q01844;Q01844-5;H7BY36;A0A0D9SFL3;C9JGE3;Q01844-4;Q01844-2	2;2;2;2;2;1;1;1;1;1	2;2;2;2;2;1;1;1;1;1	2;2;2;2;2;1;1;1;1;1	tr|B0QYK0|B0QYK0_HUMAN Isoform of Q01844, RNA-binding protein EWS OS=Homo sapiens OX=9606 GN=EWSR1 PE=1 SV=1;sp|Q01844-6|EWS-6_HUMAN Isoform of Q01844, Isoform 6 of RNA-binding protein EWS OS=Homo sapiens OX=9606 GN=EWSR1 PE=1 SV=1;sp|Q01844-3|EWS-3_HUMAN	10	2	2	2	2	2	2	0	2	2	2	0	2	2	2	0	6.1	6.1	6.1	64.929	618	618;600;655;656;661;308;584;620;354;583	0	11.237	0.91344	1.1691	4.4202	7	2	Leave out requantified	1.3024	0.76702	0.79651	NaN	1.1969	0.80886	1.2272	NaN
NCAPH	Condensin complex subunit 2	1.0191	0.80834	1.0312	NaN	E9PHA2;Q15003-2;Q15003;C9J470;H7C415	E9PHA2;Q15003-2;Q15003;C9J470	5;5;5;3;2	5;5;5;3;2	5;5;5;3;2	tr|E9PHA2|E9PHA2_HUMAN Isoform of Q15003, Condensin complex subunit 2 OS=Homo sapiens OX=9606 GN=NCAPH PE=1 SV=1;sp|Q15003-2|CND2-2_HUMAN Isoform of Q15003, Isoform 2 of Condensin complex subunit 2 OS=Homo sapiens OX=9606 GN=NCAPH PE=1 SV=3;sp|Q15003|CND2_	5	5	5	5	3	1	4	0	3	1	4	0	3	1	4	0	8.5	8.5	8.5	81.572	730	730;605;741;607;182	0	5.2513	0.82527	1.0392	13.863	6	0	Leave out requantified	1.0851	0.77128	0.67344	NaN	1.0191	0.80834	1.0312	NaN
DGCR8	Microprocessor complex subunit DGCR8	NaN	0.8064	NaN	NaN	Q8WYQ5-3;Q8WYQ5	Q8WYQ5-3;Q8WYQ5	1;1	1;1	1;1	sp|Q8WYQ5-3|DGCR8-3_HUMAN Isoform of Q8WYQ5, Isoform 3 of Microprocessor complex subunit DGCR8 OS=Homo sapiens OX=9606 GN=DGCR8 PE=1 SV=1;sp|Q8WYQ5|DGCR8_HUMAN Microprocessor complex subunit DGCR8 OS=Homo sapiens OX=9606 GN=DGCR8 PE=1 SV=1	2	1	1	1	0	1	0	0	0	1	0	0	0	1	0	0	1.8	1.8	1.8	82.75	740	740;773	0.006315	1.7161	0.818	0.8064	NaN	1	0	Median	NaN	0.818	NaN	NaN	NaN	0.8064	NaN	NaN
CCSER1	Serine-rich coiled-coil domain-containing protein 1	NaN	0.80597	NaN	NaN	H0YA74;E7EUW0;Q9C0I3-2;Q9C0I3	H0YA74;E7EUW0;Q9C0I3-2;Q9C0I3	1;1;1;1	1;1;1;1	1;1;1;1	tr|H0YA74|H0YA74_HUMAN Isoform of Q9C0I3, Serine-rich coiled-coil domain-containing protein 1 (Fragment) OS=Homo sapiens OX=9606 GN=CCSER1 PE=1 SV=1;tr|E7EUW0|E7EUW0_HUMAN Isoform of Q9C0I3, Serine-rich coiled-coil domain-containing protein 1 OS=Homo sapie	4	1	1	1	0	1	0	0	0	1	0	0	0	1	0	0	10.9	10.9	10.9	14.872	137	137;663;677;900	1	-2	0.74128	0.80597	NaN	1	0	Median	NaN	0.74128	NaN	NaN	NaN	0.80597	NaN	NaN
SART3		NaN	0.80512	NaN	NaN	F8VV04;A0A494C0L2;F8W667;Q15020-2;F8VVK9;F8VZM2;Q15020-3	F8VV04	10;3;3;3;2;2;1	1;0;0;0;0;0;0	1;0;0;0;0;0;0	tr|F8VV04|F8VV04_HUMAN Isoform of Q15020, Squamous cell carcinoma antigen recognized by T-cells 3 (Fragment) OS=Homo sapiens OX=9606 GN=SART3 PE=1 SV=1	7	10	1	1	8	8	6	6	0	1	0	0	0	1	0	0	14.8	1.4	1.4	89.04	771	771;263;305;364;111;156;129	0.0072569	1.5817	0.76413	0.80512	NaN	1	0	Median	NaN	0.76413	NaN	NaN	NaN	0.80512	NaN	NaN
MT-CO2	Cytochrome c oxidase subunit 2	1.599	0.80337	NaN	NaN	P00403	P00403	2	2	2	sp|P00403|COX2_HUMAN Cytochrome c oxidase subunit 2 OS=Homo sapiens OX=9606 GN=MT-CO2 PE=1 SV=1	1	2	2	2	1	2	0	0	1	2	0	0	1	2	0	0	11.5	11.5	11.5	25.565	227	227	0.00081136	2.4098	1.2775	1.1334	48.671	2	0	Median	1.6124	1.0121	NaN	NaN	1.599	0.80337	NaN	NaN
		1.4314	0.80324	NaN	NaN	REV__Q2M3G0-1;REV__Q2M3G0	REV__Q2M3G0-1;REV__Q2M3G0	1;1	1;1	1;1	sp|Q2M3G0-1|ABCB5-1_HUMAN Isoform of Q2M3G0, Isoform 1 of ATP-binding cassette sub-family B member 5 OS=Homo sapiens OX=9606 GN=ABCB5 PE=2 SV=4;sp|Q2M3G0|ABCB5_HUMAN ATP-binding cassette sub-family B member 5 OS=Homo sapiens OX=9606 GN=ABCB5 PE=1 SV=4	2	1	1	1	1	1	0	0	1	1	0	0	1	1	0	0	0	0	0	89.83	812	812;1257	1	-2	1.2114	1.0723	40.855	2	0	Median	1.4168	1.0358	NaN	NaN	1.4314	0.80324	NaN	NaN
TRIOBP	TRIO and F-actin-binding protein	NaN	0.79896	NaN	NaN	F6WYE2;F6TR96;H0Y5J9;Q9H2D6-6;Q9H2D6-5;Q9H2D6-7;Q9H2D6-3;Q9H2D6-2;Q9H2D6	F6WYE2;F6TR96;H0Y5J9;Q9H2D6-6;Q9H2D6-5;Q9H2D6-7;Q9H2D6-3;Q9H2D6-2;Q9H2D6	2;2;2;2;2;2;2;2;2	2;2;2;2;2;2;2;2;2	2;2;2;2;2;2;2;2;2	tr|F6WYE2|F6WYE2_HUMAN Isoform of Q9H2D6, TRIO and F-actin-binding protein (Fragment) OS=Homo sapiens OX=9606 GN=TRIOBP PE=1 SV=1;tr|F6TR96|F6TR96_HUMAN Isoform of Q9H2D6, TRIO and F-actin-binding protein (Fragment) OS=Homo sapiens OX=9606 GN=TRIOBP PE=1 S	9	2	2	2	1	2	0	0	1	2	0	0	1	2	0	0	12.5	12.5	12.5	28.957	256	256;265;311;431;593;652;2193;2267;2365	0.0096222	1.4781	0.74508	0.79896	NaN	1	1	Median	NaN	0.74508	NaN	NaN	NaN	0.79896	NaN	NaN
RBM22	Pre-mRNA-splicing factor RBM22	NaN	0.79624	NaN	NaN	Q9NW64;Q9NW64-2;E5RJW4	Q9NW64;Q9NW64-2;E5RJW4	3;3;2	3;3;2	3;3;2	sp|Q9NW64|RBM22_HUMAN Pre-mRNA-splicing factor RBM22 OS=Homo sapiens OX=9606 GN=RBM22 PE=1 SV=1;sp|Q9NW64-2|RBM22-2_HUMAN Isoform of Q9NW64, Isoform 2 of Pre-mRNA-splicing factor RBM22 OS=Homo sapiens OX=9606 GN=RBM22 PE=1 SV=1;tr|E5RJW4|E5RJW4_HUMAN Isofo	3	3	3	3	0	3	0	0	0	3	0	0	0	3	0	0	8.8	8.8	8.8	46.895	420	420;371;179	0	3.4281	0.75511	0.79624	12.257	3	0	Leave out requantified	NaN	0.75511	NaN	NaN	NaN	0.79624	NaN	NaN
MGEA5	Protein O-GlcNAcase	0.75959	0.79563	1.2354	NaN	O60502-4;O60502;O60502-2;O60502-3;H7C3X0	O60502-4;O60502;O60502-2;O60502-3	6;6;5;3;1	6;6;5;3;1	6;6;5;3;1	sp|O60502-4|OGA-4_HUMAN Isoform of O60502, Isoform 4 of Protein O-GlcNAcase OS=Homo sapiens OX=9606 GN=OGA PE=1 SV=2;sp|O60502|OGA_HUMAN Protein O-GlcNAcase OS=Homo sapiens OX=9606 GN=OGA PE=1 SV=2;sp|O60502-2|OGA-2_HUMAN Isoform of O60502, Isoform 2 of Pr	5	6	6	6	2	3	3	0	2	3	3	0	2	3	3	0	10.1	10.1	10.1	96.931	863	863;916;849;677;256	0	10.184	0.8598	1.0037	32.918	8	2	Leave out requantified	0.82947	0.74707	0.8598	NaN	0.75959	0.79563	1.2354	NaN
PPP3CA;PPP3CB;PPP3CC	Serine/threonine-protein phosphatase 2B catalytic subunit alpha isoform;Serine/threonine-protein phosphatase;Serine/threonine-protein phosphatase 2B catalytic subunit beta isoform;Serine/threonine-protein phosphatase 2B catalytic subunit gamma isoform	NaN	0.79525	1.0107	NaN	Q08209-5;Q08209-3;Q08209-2;E7ETC2;Q08209;E9PPC8;P16298;G3V111;Q5F2F8;E9PK68;P16298-2;P48454-3;H0YB02;P16298-3;P48454-2;P48454;Q08209-4;P16298-4	Q08209-5;Q08209-3;Q08209-2;E7ETC2;Q08209;E9PPC8;P16298;G3V111;Q5F2F8;E9PK68;P16298-2;P48454-3;H0YB02;P16298-3;P48454-2;P48454;Q08209-4;P16298-4	2;2;2;2;2;1;1;1;1;1;1;1;1;1;1;1;1;1	2;2;2;2;2;1;1;1;1;1;1;1;1;1;1;1;1;1	2;2;2;2;2;1;1;1;1;1;1;1;1;1;1;1;1;1	sp|Q08209-5|PP2BA-5_HUMAN Isoform of Q08209, Isoform 5 of Serine/threonine-protein phosphatase 2B catalytic subunit alpha isoform OS=Homo sapiens OX=9606 GN=PPP3CA PE=1 SV=1;sp|Q08209-3|PP2BA-3_HUMAN Isoform of Q08209, Isoform 3 of Serine/threonine-protein	18	2	2	2	0	1	1	0	0	1	1	0	0	1	1	0	5.9	5.9	5.9	51.245	454	454;469;511;423;521;132;524;326;496;147;514;521;153;515;502;512;289;525	0.0096017	1.4568	0.8012	0.89654	16.954	2	0	Median	NaN	0.83795	0.76607	NaN	NaN	0.79525	1.0107	NaN
RASA1	Ras GTPase-activating protein 1	NaN	0.79472	NaN	NaN	E9PGC0;P20936-2;P20936-4;P20936	E9PGC0;P20936-2;P20936-4;P20936	1;1;1;1	1;1;1;1	1;1;1;1	tr|E9PGC0|E9PGC0_HUMAN Isoform of P20936, Ras GTPase-activating protein 1 OS=Homo sapiens OX=9606 GN=RASA1 PE=1 SV=1;sp|P20936-2|RASA1-2_HUMAN Isoform of P20936, Isoform 2 of Ras GTPase-activating protein 1 OS=Homo sapiens OX=9606 GN=RASA1 PE=1 SV=1;sp|P20	4	1	1	1	0	1	0	0	0	1	0	0	0	1	0	0	1.2	1.2	1.2	101.79	881	881;870;880;1047	0.0072993	1.617	0.75205	0.79472	NaN	1	0	Median	NaN	0.75205	NaN	NaN	NaN	0.79472	NaN	NaN
SUGT1	Suppressor of G2 allele of SKP1 homolog	1.3421	0.79288	1.6385	NaN	Q9Y2Z0-2;Q9Y2Z0	Q9Y2Z0-2;Q9Y2Z0	3;3	3;3	3;3	sp|Q9Y2Z0-2|SGT1-2_HUMAN Isoform of Q9Y2Z0, Isoform 2 of Protein SGT1 homolog OS=Homo sapiens OX=9606 GN=SUGT1 PE=1 SV=3;sp|Q9Y2Z0|SGT1_HUMAN Protein SGT1 homolog OS=Homo sapiens OX=9606 GN=SUGT1 PE=1 SV=3	2	3	3	3	1	1	2	0	1	1	2	0	1	1	2	0	12.3	12.3	12.3	37.804	333	333;365	0	3.4098	1.027	1.4433	40.825	4	0	Leave out requantified	1.4374	0.75274	0.99702	NaN	1.3421	0.79288	1.6385	NaN
ELP2	Elongator complex protein 2	1.2585	0.79277	NaN	NaN	Q6IA86-4;Q6IA86-7;Q6IA86-2;Q6IA86-3;Q6IA86-5;Q6IA86;Q6IA86-6;K7ER35;F5GYE9	Q6IA86-4;Q6IA86-7;Q6IA86-2;Q6IA86-3;Q6IA86-5;Q6IA86;Q6IA86-6;K7ER35;F5GYE9	2;2;2;2;2;2;2;1;1	2;2;2;2;2;2;2;1;1	2;2;2;2;2;2;2;1;1	sp|Q6IA86-4|ELP2-4_HUMAN Isoform of Q6IA86, Isoform 4 of Elongator complex protein 2 OS=Homo sapiens OX=9606 GN=ELP2 PE=1 SV=2;sp|Q6IA86-7|ELP2-7_HUMAN Isoform of Q6IA86, Isoform 7 of Elongator complex protein 2 OS=Homo sapiens OX=9606 GN=ELP2 PE=1 SV=2;sp	9	2	2	2	1	1	0	0	1	1	0	0	1	1	0	0	3.5	3.5	3.5	78.576	705	705;756;756;800;821;826;891;101;120	0	6.358	1.0084	0.99886	32.68	2	0	Median	1.3546	0.75065	NaN	NaN	1.2585	0.79277	NaN	NaN
NEURL4	Neuralized-like protein 4	0.83402	0.78788	0.82519	NaN	K7ESJ6;K7ESM1;I3L100;I3L2W2;Q96JN8-2;Q96JN8	K7ESJ6;K7ESM1;I3L100;I3L2W2;Q96JN8-2;Q96JN8	1;1;1;1;1;1	1;1;1;1;1;1	1;1;1;1;1;1	tr|K7ESJ6|K7ESJ6_HUMAN Uncharacterized protein (Fragment) OS=Homo sapiens OX=9606 PE=4 SV=1;tr|K7ESM1|K7ESM1_HUMAN Uncharacterized protein (Fragment) OS=Homo sapiens OX=9606 PE=4 SV=1;tr|I3L100|I3L100_HUMAN Isoform of Q96JN8, Neuralized-like protein 4 (Fra	6	1	1	1	1	1	1	0	1	1	1	0	1	1	1	0	5.1	5.1	5.1	35.996	331	331;405;1430;1538;1560;1562	0	16.221	0.74005	0.82519	3.026	3	0	Median	0.87045	0.74005	0.59089	NaN	0.83402	0.78788	0.82519	NaN
RNF40	E3 ubiquitin-protein ligase BRE1B	0.99781	0.78772	1.0511	NaN	O75150;H3BP71;O75150-3;O75150-4;H3BS50;A0A087WTK2	O75150;H3BP71;O75150-3;O75150-4	5;4;4;4;1;1	5;4;4;4;1;1	4;3;3;3;1;1	sp|O75150|BRE1B_HUMAN E3 ubiquitin-protein ligase BRE1B OS=Homo sapiens OX=9606 GN=RNF40 PE=1 SV=5;tr|H3BP71|H3BP71_HUMAN Isoform of O75150, E3 ubiquitin protein ligase OS=Homo sapiens OX=9606 GN=RNF40 PE=1 SV=2;sp|O75150-3|BRE1B-3_HUMAN Isoform of O75150,	6	5	5	4	4	3	2	1	4	3	2	1	3	2	1	0	7.5	7.5	6.1	113.68	1001	1001;961;838;901;174;177	0	23.998	0.78276	0.88575	44.371	8	0	Leave out requantified	1.09	0.72766	0.64846	NaN	0.99781	0.78772	1.0511	NaN
CDC23	Cell division cycle protein 23 homolog	1.0716	0.78703	0.95445	NaN	Q9UJX2;Q9UJX2-3;D6RBY8;D6RCF8;H0Y936;Q9UJX2-2	Q9UJX2;Q9UJX2-3	5;4;1;1;1;1	5;4;1;1;1;1	5;4;1;1;1;1	sp|Q9UJX2|CDC23_HUMAN Cell division cycle protein 23 homolog OS=Homo sapiens OX=9606 GN=CDC23 PE=1 SV=3;sp|Q9UJX2-3|CDC23-3_HUMAN Isoform of Q9UJX2, Isoform 3 of Cell division cycle protein 23 homolog OS=Homo sapiens OX=9606 GN=CDC23 PE=1 SV=3	6	5	5	5	1	2	4	0	1	2	4	0	1	2	4	0	12.9	12.9	12.9	68.833	597	597;479;109;123;134;151	0	6.1781	0.8395	1.1352	8.1504	6	2	Leave out requantified	1.1704	0.67787	0.72361	NaN	1.0716	0.78703	0.95445	NaN
LPCAT4	Lysophospholipid acyltransferase LPCAT4	NaN	0.78424	1.2806	NaN	Q643R3;A0A0C4DGT4;H3BMK4	Q643R3;A0A0C4DGT4;H3BMK4	2;2;1	2;2;1	2;2;1	sp|Q643R3|LPCT4_HUMAN Lysophospholipid acyltransferase LPCAT4 OS=Homo sapiens OX=9606 GN=LPCAT4 PE=1 SV=1;tr|A0A0C4DGT4|A0A0C4DGT4_HUMAN Isoform of Q643R3, Lysophospholipid acyltransferase LPCAT4 OS=Homo sapiens OX=9606 GN=LPCAT4 PE=1 SV=1;tr|H3BMK4|H3BMK4	3	2	2	2	0	1	1	0	0	1	1	0	0	1	1	0	4.8	4.8	4.8	57.218	524	524;351;84	0.00043764	3.2173	0.84155	1.0021	34.675	2	0	Median	NaN	0.70541	1.004	NaN	NaN	0.78424	1.2806	NaN
CTBP2	C-terminal-binding protein 2	0.92479	0.78219	0.98257	NaN	Q5SQP8;P56545;P56545-3;P56545-2	Q5SQP8;P56545;P56545-3;P56545-2	4;4;4;4	4;4;4;4	3;3;3;3	tr|Q5SQP8|Q5SQP8_HUMAN Isoform of P56545, C-terminal-binding protein 2 OS=Homo sapiens OX=9606 GN=CTBP2 PE=1 SV=1;sp|P56545|CTBP2_HUMAN C-terminal-binding protein 2 OS=Homo sapiens OX=9606 GN=CTBP2 PE=1 SV=1;sp|P56545-3|CTBP2-3_HUMAN Isoform of P56545, Iso	4	4	4	3	2	1	3	0	2	1	3	0	1	0	3	0	9.7	9.7	8	56.101	513	513;445;513;985	0	10.395	0.78829	0.90041	12.279	6	0	Leave out requantified	0.99397	0.70377	0.71771	NaN	0.92479	0.78219	0.98257	NaN
MRPS18B	28S ribosomal protein S18b, mitochondrial	1.4197	0.77993	0.94351	NaN	Q9Y676;A0A0G2JIC6	Q9Y676;A0A0G2JIC6	7;6	7;6	7;6	sp|Q9Y676|RT18B_HUMAN 28S ribosomal protein S18b, mitochondrial OS=Homo sapiens OX=9606 GN=MRPS18B PE=1 SV=1;tr|A0A0G2JIC6|A0A0G2JIC6_HUMAN Isoform of Q9Y676, 28S ribosomal protein S18b, mitochondrial OS=Homo sapiens OX=9606 GN=MRPS18B PE=1 SV=1	2	7	7	7	2	6	3	2	2	6	3	2	2	6	3	2	38.4	38.4	38.4	29.395	258	258;215	0	17.68	0.91041	0.91246	33.646	8	1	Leave out requantified	1.479	0.90096	0.56042	NaN	1.4197	0.77993	0.94351	NaN
SH3TC2	SH3 domain and tetratricopeptide repeat-containing protein 2	1.1139	0.77566	NaN	NaN	E9PDF1;Q8TF17-4;Q8TF17-5;Q8TF17	E9PDF1;Q8TF17-4;Q8TF17-5;Q8TF17	1;1;1;1	1;1;1;1	1;1;1;1	tr|E9PDF1|E9PDF1_HUMAN Isoform of Q8TF17, SH3 domain and tetratricopeptide repeat-containing protein 2 OS=Homo sapiens OX=9606 GN=SH3TC2 PE=1 SV=1;sp|Q8TF17-4|S3TC2-4_HUMAN Isoform of Q8TF17, Isoform 4 of SH3 domain and tetratricopeptide repeat-containing	4	1	1	1	1	1	0	0	1	1	0	0	1	1	0	0	1	1	1	141.44	1259	1259;596;1281;1288	0.009901	1.4383	0.96335	0.92952	25.591	2	0	Median	1.2204	0.76047	NaN	NaN	1.1139	0.77566	NaN	NaN
NOLC1	Nucleolar and coiled-body phosphoprotein 1	2.0367	0.77073	0.8581	NaN	A0A0A0MRM9;Q14978;Q14978-3;Q14978-2;S4R3C2;S4R402;S4R341;S4R349	A0A0A0MRM9;Q14978;Q14978-3;Q14978-2	7;7;7;7;2;1;1;1	7;7;7;7;2;1;1;1	7;7;7;7;2;1;1;1	tr|A0A0A0MRM9|A0A0A0MRM9_HUMAN Isoform of Q14978, Nucleolar and coiled-body phosphoprotein 1 (Fragment) OS=Homo sapiens OX=9606 GN=NOLC1 PE=1 SV=1;sp|Q14978|NOLC1_HUMAN Nucleolar and coiled-body phosphoprotein 1 OS=Homo sapiens OX=9606 GN=NOLC1 PE=1 SV=2;s	8	7	7	7	4	5	5	0	4	5	5	0	4	5	5	0	14.8	14.8	14.8	74.543	708	708;699;700;709;281;46;73;258	0	14.841	0.894	0.98826	35.689	15	2	Leave out requantified	2.1077	0.87035	0.57283	NaN	2.0367	0.77073	0.8581	NaN
TFG	Protein TFG	1.2909	0.77023	1.095	NaN	Q92734-4;Q92734-3;Q92734-2;Q92734;C9JJP5;C9JUE0;C9JTY3	Q92734-4;Q92734-3;Q92734-2;Q92734;C9JJP5;C9JUE0	4;4;4;4;3;2;1	4;4;4;4;3;2;1	4;4;4;4;3;2;1	sp|Q92734-4|TFG-4_HUMAN Isoform of Q92734, Isoform 4 of Protein TFG OS=Homo sapiens OX=9606 GN=TFG PE=1 SV=2;sp|Q92734-3|TFG-3_HUMAN Isoform of Q92734, Isoform 3 of Protein TFG OS=Homo sapiens OX=9606 GN=TFG PE=1 SV=2;sp|Q92734-2|TFG-2_HUMAN Isoform of Q92	7	4	4	4	3	2	4	0	3	2	4	0	3	2	4	0	30	30	30	30.921	280	280;284;396;400;181;157;128	0	31.634	0.75149	1.0731	20.811	9	4	Leave out requantified	1.3321	0.67816	0.76455	NaN	1.2909	0.77023	1.095	NaN
TIMM23B;TIMM23	Mitochondrial import inner membrane translocase subunit Tim23;Putative mitochondrial import inner membrane translocase subunit Tim23B	1.7597	0.76843	NaN	NaN	B4DDK6;O14925;Q5SRD1	B4DDK6;O14925;Q5SRD1	1;1;1	1;1;1	1;1;1	tr|B4DDK6|B4DDK6_HUMAN Isoform of Q5SRD1, Putative mitochondrial import inner membrane translocase subunit Tim23B OS=Homo sapiens OX=9606 GN=TIMM23B PE=2 SV=1;sp|O14925|TIM23_HUMAN Mitochondrial import inner membrane translocase subunit Tim23 OS=Homo sapie	3	1	1	1	1	1	0	0	1	1	0	0	1	1	0	0	12.1	12.1	12.1	14.6	140	140;209;257	0	18.803	1.3294	1.1628	58.587	2	1	Median	1.8173	0.97249	NaN	NaN	1.7597	0.76843	NaN	NaN
TRIM33	E3 ubiquitin-protein ligase TRIM33	1.6339	0.76538	0.88981	NaN	H0Y612;Q9UPN9-2;Q9UPN9	H0Y612;Q9UPN9-2;Q9UPN9	3;3;3	3;3;3	3;3;3	tr|H0Y612|H0Y612_HUMAN Isoform of Q9UPN9, E3 ubiquitin-protein ligase TRIM33 (Fragment) OS=Homo sapiens OX=9606 GN=TRIM33 PE=1 SV=1;sp|Q9UPN9-2|TRI33-2_HUMAN Isoform of Q9UPN9, Isoform Beta of E3 ubiquitin-protein ligase TRIM33 OS=Homo sapiens OX=9606 GN=T	3	3	3	3	2	2	2	2	2	2	2	2	2	2	2	2	4.2	4.2	4.2	98.891	888	888;1110;1127	0	7.5171	0.77639	0.88981	37.98	9	3	Median	1.7159	0.77639	0.64015	NaN	1.6339	0.76538	0.88981	NaN
		1.2254	0.76318	NaN	NaN	A0A0R4J2F3;P0DPB6	A0A0R4J2F3;P0DPB6	2;2	2;2	2;2	tr|A0A0R4J2F3|A0A0R4J2F3_HUMAN Isoform of P0DPB6, Protein POLR1D, isoform 2 OS=Homo sapiens OX=9606 GN=POLR1D PE=1 SV=1;sp|P0DPB6|RPAC2_HUMAN DNA-directed RNA polymerases I and III subunit RPAC2 OS=Homo sapiens OX=9606 GN=POLR1D PE=1 SV=1	2	2	2	2	2	1	1	0	2	1	1	0	2	1	1	0	26.7	26.7	26.7	13.262	116	116;133	0	8.567	1.1234	0.96704	33.481	2	0	Median	1.2384	1.0191	NaN	NaN	1.2254	0.76318	NaN	NaN
DAD1	Dolichyl-diphosphooligosaccharide--protein glycosyltransferase subunit DAD1	1.0303	0.75629	1.049	NaN	F5H895;A0A0B4J239;F5GXX5;P61803	F5H895;A0A0B4J239;F5GXX5;P61803	2;2;2;2	2;2;2;2	2;2;2;2	tr|F5H895|F5H895_HUMAN Isoform of P61803, Dolichyl-diphosphooligosaccharide--protein glycosyltransferase subunit DAD1 OS=Homo sapiens OX=9606 GN=DAD1 PE=1 SV=1;tr|A0A0B4J239|A0A0B4J239_HUMAN Isoform of P61803, Dolichyl-diphosphooligosaccharide--protein gly	4	2	2	2	2	2	2	0	2	2	2	0	2	2	2	0	33.8	33.8	33.8	7.2883	65	65;78;85;113	0	5.4031	0.79659	1.0053	0.46829	6	0	Leave out requantified	1.0375	0.79659	0.55073	NaN	1.0303	0.75629	1.049	NaN
PIH1D1	PIH1 domain-containing protein 1	NaN	0.7527	1.4914	NaN	Q9NWS0;M0R0J2;M0R2P8;M0R3A8;M0R3A4;M0QXD5;M0QYA2;Q9NWS0-3	Q9NWS0;M0R0J2;M0R2P8;M0R3A8;M0R3A4;M0QXD5;M0QYA2;Q9NWS0-3	2;1;1;1;1;1;1;1	2;1;1;1;1;1;1;1	2;1;1;1;1;1;1;1	sp|Q9NWS0|PIHD1_HUMAN PIH1 domain-containing protein 1 OS=Homo sapiens OX=9606 GN=PIH1D1 PE=1 SV=1;tr|M0R0J2|M0R0J2_HUMAN Isoform of Q9NWS0, PIH1 domain-containing protein 1 (Fragment) OS=Homo sapiens OX=9606 GN=PIH1D1 PE=1 SV=1;tr|M0R2P8|M0R2P8_HUMAN Isof	8	2	2	2	0	1	1	0	0	1	1	0	0	1	1	0	8.3	8.3	8.3	32.363	290	290;82;114;115;183;236;273;199	0.0023059	2.0075	0.79444	1.0595	48.351	2	0	Median	NaN	0.76343	0.82671	NaN	NaN	0.7527	1.4914	NaN
		NaN	0.75159	NaN	NaN	REV__H3BP90;REV__Q96ST3;REV__H3BT34;REV__H3BQ76;REV__H3BQ88;REV__H3BNA0;REV__H3BNZ3;REV__H3BQL7	REV__H3BP90;REV__Q96ST3;REV__H3BT34;REV__H3BQ76;REV__H3BQ88;REV__H3BNA0;REV__H3BNZ3;REV__H3BQL7	2;2;1;1;1;1;1;1	2;2;1;1;1;1;1;1	2;2;1;1;1;1;1;1	tr|H3BP90|H3BP90_HUMAN Isoform of Q96ST3, Paired amphipathic helix protein Sin3a (Fragment) OS=Homo sapiens OX=9606 GN=SIN3A PE=1 SV=1;sp|Q96ST3|SIN3A_HUMAN Paired amphipathic helix protein Sin3a OS=Homo sapiens OX=9606 GN=SIN3A PE=1 SV=2;tr|H3BT34|H3BT34_	8	2	2	2	0	1	1	0	0	1	1	0	0	1	1	0	0	0	0	19.275	176	176;1273;98;107;123;130;142;156	0.0070162	1.6701	0.73902	0.75159	NaN	1	0	Median	NaN	0.73902	NaN	NaN	NaN	0.75159	NaN	NaN
TRIP11	Thyroid receptor-interacting protein 11	1.3007	0.75025	1.3774	NaN	Q15643;H0YJ97	Q15643;H0YJ97	7;6	7;6	7;6	sp|Q15643|TRIPB_HUMAN Thyroid receptor-interacting protein 11 OS=Homo sapiens OX=9606 GN=TRIP11 PE=1 SV=3;tr|H0YJ97|H0YJ97_HUMAN Isoform of Q15643, Thyroid receptor-interacting protein 11 (Fragment) OS=Homo sapiens OX=9606 GN=TRIP11 PE=1 SV=1	2	7	7	7	5	2	4	1	5	2	4	1	5	2	4	1	4.4	4.4	4.4	227.58	1979	1979;1695	0	47.248	1.3049	1.3703	18.754	9	4	Leave out requantified	1.3752	0.67436	0.88315	NaN	1.3007	0.75025	1.3774	NaN
ACTR2	Actin-related protein 2	0.89134	0.75007	1.167	NaN	P61160;F5H6T1;P61160-2	P61160;F5H6T1;P61160-2	4;3;3	4;3;3	4;3;3	sp|P61160|ARP2_HUMAN Actin-related protein 2 OS=Homo sapiens OX=9606 GN=ACTR2 PE=1 SV=1;tr|F5H6T1|F5H6T1_HUMAN Isoform of P61160, Actin-related protein 2 OS=Homo sapiens OX=9606 GN=ACTR2 PE=1 SV=2;sp|P61160-2|ARP2-2_HUMAN Isoform of P61160, Isoform 2 of Ac	3	4	4	4	3	4	4	0	3	4	4	0	3	4	4	0	12.4	12.4	12.4	44.76	394	394;339;399	0	8.9091	0.75123	0.90705	3.2696	12	1	Leave out requantified	0.97294	0.73857	0.67253	NaN	0.89134	0.75007	1.167	NaN
PANK4	Pantothenate kinase 4	1.1798	0.75006	NaN	NaN	H0YA26;E9PHT6;A0A494C169;Q9NVE7;H0Y9E4	H0YA26;E9PHT6;A0A494C169;Q9NVE7;H0Y9E4	2;2;2;2;1	2;2;2;2;1	2;2;2;2;1	tr|H0YA26|H0YA26_HUMAN Isoform of Q9NVE7, Pantothenate kinase 4 (Fragment) OS=Homo sapiens OX=9606 GN=PANK4 PE=1 SV=1;tr|E9PHT6|E9PHT6_HUMAN Isoform of Q9NVE7, Pantothenate kinase 4 OS=Homo sapiens OX=9606 GN=PANK4 PE=1 SV=3;tr|A0A494C169|A0A494C169_HUMAN	5	2	2	2	1	1	0	0	1	1	0	0	1	1	0	0	5.7	5.7	5.7	52.963	473	473;734;781;773;136	0	3.6643	0.95745	0.9407	32.028	2	0	Median	1.2908	0.71018	NaN	NaN	1.1798	0.75006	NaN	NaN
CS	Citrate synthase, mitochondrial;Citrate synthase	1.0427	0.74765	1.8291	NaN	O75390;B4DJV2;A0A0C4DGI3;F8VPF9;H0YH82;F8W1S4;F8VPA1;H0YIC4;F8VRI6;F8VZK9;F8VR34;F8VTT8;F8W4S1;F8VX68;F8VRP1;F8VX07;F8W642	O75390;B4DJV2;A0A0C4DGI3;F8VPF9;H0YH82;F8W1S4;F8VPA1;H0YIC4	4;4;4;2;2;2;2;2;1;1;1;1;1;1;1;1;1	4;4;4;2;2;2;2;2;1;1;1;1;1;1;1;1;1	4;4;4;2;2;2;2;2;1;1;1;1;1;1;1;1;1	sp|O75390|CISY_HUMAN Citrate synthase, mitochondrial OS=Homo sapiens OX=9606 GN=CS PE=1 SV=2;tr|B4DJV2|B4DJV2_HUMAN Isoform of O75390, Citrate synthase OS=Homo sapiens OX=9606 GN=CS PE=1 SV=1;tr|A0A0C4DGI3|A0A0C4DGI3_HUMAN Isoform of O75390, Citrate syntha	17	4	4	4	4	1	3	0	4	1	3	0	4	1	3	0	9.9	9.9	9.9	51.712	466	466;453;400;140;190;157;144;123;140;80;146;149;178;120;117;114;66	0	6.9766	1.1131	1.0611	27.545	8	1	Leave out requantified	1.1094	0.71416	1.2584	NaN	1.0427	0.74765	1.8291	NaN
LSM12	Protein LSM12 homolog	NaN	0.74736	NaN	NaN	K7ELG9;Q3MHD2;Q3MHD2-2	K7ELG9;Q3MHD2;Q3MHD2-2	2;2;2	2;2;2	2;2;2	tr|K7ELG9|K7ELG9_HUMAN Isoform of Q3MHD2, Protein LSM12 homolog OS=Homo sapiens OX=9606 GN=LSM12 PE=1 SV=1;sp|Q3MHD2|LSM12_HUMAN Protein LSM12 homolog OS=Homo sapiens OX=9606 GN=LSM12 PE=1 SV=2;sp|Q3MHD2-2|LSM12-2_HUMAN Isoform of Q3MHD2, Isoform 2 of Prot	3	2	2	2	0	2	0	0	0	2	0	0	0	2	0	0	11.7	11.7	11.7	24.955	230	230;195;198	0	5.2068	1.0071	0.74736	109.24	3	1	Median	NaN	1.0071	NaN	NaN	NaN	0.74736	NaN	NaN
STRN	Striatin	1.3151	0.74541	1.5511	NaN	O43815-2;O43815	O43815-2;O43815	3;3	3;3	3;3	sp|O43815-2|STRN-2_HUMAN Isoform of O43815, Isoform 2 of Striatin OS=Homo sapiens OX=9606 GN=STRN PE=1 SV=4;sp|O43815|STRN_HUMAN Striatin OS=Homo sapiens OX=9606 GN=STRN PE=1 SV=4	2	3	3	3	3	1	1	0	3	1	1	0	3	1	1	0	6.7	6.7	6.7	80.76	731	731;780	0	8.936	1.1707	1.3151	31.024	5	2	Median	1.4327	0.70195	1.0898	NaN	1.3151	0.74541	1.5511	NaN
THUMPD3	THUMP domain-containing protein 3	1.3176	0.74377	1.6745	NaN	Q9BV44;H7C3J3;H7C0R6	Q9BV44;H7C3J3;H7C0R6	4;3;2	4;3;2	4;3;2	sp|Q9BV44|THUM3_HUMAN THUMP domain-containing protein 3 OS=Homo sapiens OX=9606 GN=THUMPD3 PE=1 SV=1;tr|H7C3J3|H7C3J3_HUMAN Isoform of Q9BV44, THUMP domain-containing protein 3 (Fragment) OS=Homo sapiens OX=9606 GN=THUMPD3 PE=1 SV=1;tr|H7C0R6|H7C0R6_HUMAN	3	4	4	4	3	2	1	0	3	2	1	0	3	2	1	0	8.7	8.7	8.7	57.002	507	507;269;232	0	5.1522	1.0676	1.1322	22.038	6	0	Leave out requantified	1.4493	0.693	1.1348	NaN	1.3176	0.74377	1.6745	NaN
SMC6	Structural maintenance of chromosomes protein 6	NaN	0.74175	NaN	NaN	Q96SB8;Q96SB8-2	Q96SB8;Q96SB8-2	1;1	1;1	1;1	sp|Q96SB8|SMC6_HUMAN Structural maintenance of chromosomes protein 6 OS=Homo sapiens OX=9606 GN=SMC6 PE=1 SV=2;sp|Q96SB8-2|SMC6-2_HUMAN Isoform of Q96SB8, Isoform 2 of Structural maintenance of chromosomes protein 6 OS=Homo sapiens OX=9606 GN=SMC6 PE=1 SV=	2	1	1	1	0	1	0	0	0	1	0	0	0	1	0	0	1.6	1.6	1.6	126.32	1091	1091;1117	0.0030687	1.9934	0.69956	0.74175	NaN	1	0	Median	NaN	0.69956	NaN	NaN	NaN	0.74175	NaN	NaN
ANKRD28	Serine/threonine-protein phosphatase 6 regulatory ankyrin repeat subunit A	0.89164	0.73816	1.0094	NaN	O15084-2;O15084;O15084-4;O15084-1;B4DIW9	O15084-2;O15084;O15084-4;O15084-1	3;3;3;3;1	3;3;3;3;1	3;3;3;3;1	sp|O15084-2|ANR28-2_HUMAN Isoform of O15084, Isoform 2 of Serine/threonine-protein phosphatase 6 regulatory ankyrin repeat subunit A OS=Homo sapiens OX=9606 GN=ANKRD28 PE=1 SV=5;sp|O15084|ANR28_HUMAN Serine/threonine-protein phosphatase 6 regulatory ankyri	5	3	3	3	2	1	2	0	2	1	2	0	2	1	2	0	3.7	3.7	3.7	96.16	899	899;1053;1083;1086;722	0.00044033	3.2983	0.81083	0.94713	8.6248	5	0	Leave out requantified	0.95623	0.69033	0.73567	NaN	0.89164	0.73816	1.0094	NaN
ARFGEF1;ARFGEF2	Brefeldin A-inhibited guanine nucleotide-exchange protein 1;Brefeldin A-inhibited guanine nucleotide-exchange protein 2	0.92977	0.73797	0.95262	NaN	E5RHL7;E5RIF2;Q9Y6D6;Q9Y6D5	E5RHL7;E5RIF2;Q9Y6D6;Q9Y6D5	2;2;2;1	2;2;2;1	2;2;2;1	tr|E5RHL7|E5RHL7_HUMAN Isoform of Q9Y6D6, Brefeldin A-inhibited guanine nucleotide-exchange protein 1 (Fragment) OS=Homo sapiens OX=9606 GN=ARFGEF1 PE=1 SV=2;tr|E5RIF2|E5RIF2_HUMAN Isoform of Q9Y6D6, Brefeldin A-inhibited guanine nucleotide-exchange protei	4	2	2	2	2	1	1	0	2	1	1	0	2	1	1	0	4	4	4	93.665	825	825;1279;1849;1785	0	9.4594	0.76574	0.89631	8.616	4	0	Leave out requantified	0.94311	0.68932	0.61089	NaN	0.92977	0.73797	0.95262	NaN
CALR	Calreticulin	1.1245	0.73647	1.2712	NaN	P27797;K7EJB9;K7EL50	P27797;K7EJB9	7;5;1	7;5;1	7;5;1	sp|P27797|CALR_HUMAN Calreticulin OS=Homo sapiens OX=9606 GN=CALR PE=1 SV=1;tr|K7EJB9|K7EJB9_HUMAN Isoform of P27797, Calreticulin (Fragment) OS=Homo sapiens OX=9606 GN=CALR PE=1 SV=1	3	7	7	7	6	1	7	0	6	1	7	0	6	1	7	0	22.1	22.1	22.1	48.141	417	417;247;163	0	23.21	1.0192	1.0952	7.4969	14	0	Leave out requantified	1.1403	0.65957	0.98138	NaN	1.1245	0.73647	1.2712	NaN
GTPBP1	GTP-binding protein 1	0.98168	0.73644	NaN	NaN	O00178;F5H716	O00178	3;1	3;1	3;1	sp|O00178|GTPB1_HUMAN GTP-binding protein 1 OS=Homo sapiens OX=9606 GN=GTPBP1 PE=1 SV=3	2	3	3	3	1	2	1	0	1	2	1	0	1	2	1	0	6.6	6.6	6.6	72.453	669	669;152	0	4.0899	0.71974	0.79045	18.042	3	0	Median	1.0962	0.68837	NaN	NaN	0.98168	0.73644	NaN	NaN
SAE1	SUMO-activating enzyme subunit 1;SUMO-activating enzyme subunit 1, N-terminally processed	NaN	0.73548	1.1727	NaN	M0QZS6;Q9UBE0;M0QX65;B3KNJ4;Q9UBE0-2;Q9UBE0-3	M0QZS6;Q9UBE0;M0QX65;B3KNJ4;Q9UBE0-2;Q9UBE0-3	3;3;2;2;2;2	3;3;2;2;2;2	3;3;2;2;2;2	tr|M0QZS6|M0QZS6_HUMAN Isoform of Q9UBE0, SUMO-activating enzyme subunit 1 OS=Homo sapiens OX=9606 GN=SAE1 PE=1 SV=1;sp|Q9UBE0|SAE1_HUMAN SUMO-activating enzyme subunit 1 OS=Homo sapiens OX=9606 GN=SAE1 PE=1 SV=1;tr|M0QX65|M0QX65_HUMAN Isoform of Q9UBE0, S	6	3	3	3	0	1	3	0	0	1	3	0	0	1	3	0	17.7	17.7	17.7	29.422	265	265;346;205;299;266;299	0	3.8684	0.77324	0.97939	54.24	4	1	Median	NaN	0.74533	0.8022	NaN	NaN	0.73548	1.1727	NaN
ALDH16A1	Aldehyde dehydrogenase family 16 member A1	1.0255	0.73528	0.89801	NaN	F5H4B6;Q8IZ83-3;Q8IZ83	F5H4B6;Q8IZ83-3;Q8IZ83	5;5;5	5;5;5	5;5;5	tr|F5H4B6|F5H4B6_HUMAN Isoform of Q8IZ83, Aldehyde dehydrogenase family 16 member A1 OS=Homo sapiens OX=9606 GN=ALDH16A1 PE=1 SV=1;sp|Q8IZ83-3|A16A1-3_HUMAN Isoform of Q8IZ83, Isoform 3 of Aldehyde dehydrogenase family 16 member A1 OS=Homo sapiens OX=9606	3	5	5	5	4	1	1	0	4	1	1	0	4	1	1	0	11.4	11.4	11.4	67.152	639	639;751;802	0	7.9781	1.0467	0.97485	13.409	6	1	Leave out requantified	1.1014	0.69858	0.62516	NaN	1.0255	0.73528	0.89801	NaN
ALAS1	5-aminolevulinate synthase, nonspecific, mitochondrial	NaN	0.73513	NaN	NaN	P13196	P13196	2	2	2	sp|P13196|HEM1_HUMAN 5-aminolevulinate synthase, nonspecific, mitochondrial OS=Homo sapiens OX=9606 GN=ALAS1 PE=1 SV=2	1	2	2	2	0	2	0	1	0	2	0	1	0	2	0	1	7.5	7.5	7.5	70.58	640	640	0	5.0917	0.70325	0.73513	8.1977	2	1	Median	NaN	0.70325	NaN	NaN	NaN	0.73513	NaN	NaN
C10orf111	Uncharacterized protein C10orf111	NaN	0.73398	1.1293	NaN	Q8N326	Q8N326	1	1	1	sp|Q8N326|CJ111_HUMAN Uncharacterized protein C10orf111 OS=Homo sapiens OX=9606 GN=C10orf111 PE=2 SV=1	1	1	1	1	0	1	1	0	0	1	1	0	0	1	1	0	5.8	5.8	5.8	17.766	155	155	0.0055783	1.7451	0.71393	0.91043	30.467	2	0	Median	NaN	0.68926	0.73948	NaN	NaN	0.73398	1.1293	NaN
ACBD3	Golgi resident protein GCP60	NaN	0.73077	1.1302	NaN	Q9H3P7	Q9H3P7	2	2	2	sp|Q9H3P7|GCP60_HUMAN Golgi resident protein GCP60 OS=Homo sapiens OX=9606 GN=ACBD3 PE=1 SV=4	1	2	2	2	0	2	1	0	0	2	1	0	0	2	1	0	7.6	7.6	7.6	60.593	528	528	0	11.62	0.69414	1.1297	25.193	3	2	Plateau	NaN	0.6875	0.73757	NaN	NaN	0.73077	1.1302	NaN
MRPL9	39S ribosomal protein L9, mitochondrial	1.3155	0.73074	0.78093	NaN	A0A1W2PS92;A0A1W2PPE5;A0A1W2PQB6;Q5SZR1;Q9BYD2	A0A1W2PS92;A0A1W2PPE5;A0A1W2PQB6;Q5SZR1;Q9BYD2	2;1;1;1;1	2;1;1;1;1	2;1;1;1;1	tr|A0A1W2PS92|A0A1W2PS92_HUMAN Isoform of Q9BYD2, 39S ribosomal protein L9, mitochondrial (Fragment) OS=Homo sapiens OX=9606 GN=MRPL9 PE=1 SV=1;tr|A0A1W2PPE5|A0A1W2PPE5_HUMAN Isoform of Q9BYD2, 39S ribosomal protein L9, mitochondrial (Fragment) OS=Homo sap	5	2	2	2	1	1	1	0	1	1	1	0	1	1	1	0	15.7	15.7	15.7	17.265	153	153;87;130;233;267	0.0026861	1.9967	0.93637	0.78093	32.195	3	1	Median	1.3569	0.93637	0.56324	NaN	1.3155	0.73074	0.78093	NaN
MAD2L1	Mitotic spindle assembly checkpoint protein MAD2A	1.736	0.72914	1.3561	NaN	Q13257	Q13257	2	2	2	sp|Q13257|MD2L1_HUMAN Mitotic spindle assembly checkpoint protein MAD2A OS=Homo sapiens OX=9606 GN=MAD2L1 PE=1 SV=1	1	2	2	2	1	1	1	0	1	1	1	0	1	1	1	0	11.7	11.7	11.7	23.51	205	205	0.00082781	2.5491	0.93709	1.3561	44.695	3	2	Median	1.7409	0.93709	0.6837	NaN	1.736	0.72914	1.3561	NaN
		NaN	0.72711	NaN	NaN	REV__Q86Y56-2;REV__Q86Y56	REV__Q86Y56-2;REV__Q86Y56	1;1	1;1	1;1	sp|Q86Y56-2|DAAF5-2_HUMAN Isoform of Q86Y56, Isoform 2 of Dynein assembly factor 5, axonemal OS=Homo sapiens OX=9606 GN=DNAAF5 PE=1 SV=4;sp|Q86Y56|DAAF5_HUMAN Dynein assembly factor 5, axonemal OS=Homo sapiens OX=9606 GN=DNAAF5 PE=1 SV=4	2	1	1	1	0	1	0	0	0	1	0	0	0	1	0	0	0	0	0	92.043	843	843;855	0.0020016	2.3081	0.68368	0.72711	NaN	1	0	Median	NaN	0.68368	NaN	NaN	NaN	0.72711	NaN	NaN
RCOR1	REST corepressor 1	1.1973	0.72424	0.886	NaN	Q9UKL0	Q9UKL0	3	3	3	sp|Q9UKL0|RCOR1_HUMAN REST corepressor 1 OS=Homo sapiens OX=9606 GN=RCOR1 PE=1 SV=2	1	3	3	3	3	3	1	0	3	3	1	0	3	3	1	0	9.5	9.5	9.5	53.327	485	485	0	17.421	0.83137	0.90081	13.655	6	0	Leave out requantified	1.3357	0.67593	0.68704	NaN	1.1973	0.72424	0.886	NaN
ENO3	Beta-enolase	NaN	0.7237	1.3211	NaN	P13929-3;P13929-2;P13929	P13929-3;P13929-2;P13929	2;2;2	1;1;1	1;1;1	sp|P13929-3|ENOB-3_HUMAN Isoform of P13929, Isoform 3 of Beta-enolase OS=Homo sapiens OX=9606 GN=ENO3 PE=1 SV=5;sp|P13929-2|ENOB-2_HUMAN Isoform of P13929, Isoform 2 of Beta-enolase OS=Homo sapiens OX=9606 GN=ENO3 PE=1 SV=5;sp|P13929|ENOB_HUMAN Beta-enolas	3	2	1	1	1	2	2	1	0	1	1	0	0	1	1	0	8.2	3.6	3.6	42.248	391	391;406;434	0.0019631	2.1556	0.77703	0.97779	42.556	2	0	Median	NaN	0.66248	0.91138	NaN	NaN	0.7237	1.3211	NaN
NDUFA13	NADH dehydrogenase [ubiquinone] 1 alpha subcomplex subunit 13	NaN	0.72051	0.76437	NaN	B4DEZ3;K7EJE1;E7ENQ6;Q9P0J0;Q9P0J0-2;U3KQP3	B4DEZ3;K7EJE1;E7ENQ6;Q9P0J0;Q9P0J0-2;U3KQP3	2;2;2;2;2;1	2;2;2;2;2;1	2;2;2;2;2;1	tr|B4DEZ3|B4DEZ3_HUMAN Isoform of Q9P0J0, NADH dehydrogenase [ubiquinone] 1 alpha subcomplex subunit 13 OS=Homo sapiens OX=9606 GN=NDUFA13 PE=2 SV=1;tr|K7EJE1|K7EJE1_HUMAN Isoform of Q9P0J0, NADH dehydrogenase [ubiquinone] 1 alpha subcomplex subunit 13 OS=	6	2	2	2	0	1	1	0	0	1	1	0	0	1	1	0	20	20	20	14.085	120	120;150;273;144;222;75	0.00083647	2.646	0.77234	0.74212	4.1788	2	0	Median	NaN	0.94675	0.63005	NaN	NaN	0.72051	0.76437	NaN
STMN1	Stathmin	1.1537	0.72007	1.2778	NaN	A2A2D0;P16949;P16949-2	A2A2D0;P16949;P16949-2	1;1;1	1;1;1	1;1;1	tr|A2A2D0|A2A2D0_HUMAN Isoform of P16949, Stathmin (Fragment) OS=Homo sapiens OX=9606 GN=STMN1 PE=1 SV=8;sp|P16949|STMN1_HUMAN Stathmin OS=Homo sapiens OX=9606 GN=STMN1 PE=1 SV=3;sp|P16949-2|STMN1-2_HUMAN Isoform of P16949, Isoform 2 of Stathmin OS=Homo sa	3	1	1	1	1	1	1	0	1	1	1	0	1	1	1	0	15.3	15.3	15.3	9.7931	85	85;149;174	0	5.5926	0.97663	1.4426	25.781	4	0	Linear	1.1659	0.82945	0.66606	NaN	1.1537	0.72007	1.2778	NaN
TBC1D4	TBC1 domain family member 4	0.60126	0.71853	5.5961	NaN	O60343-4;O60343-5	O60343-4;O60343-5	2;2	2;2	1;1	sp|O60343-4|TBCD4-4_HUMAN Isoform of O60343, Isoform 4 of TBC1 domain family member 4 OS=Homo sapiens OX=9606 GN=TBC1D4 PE=1 SV=2;sp|O60343-5|TBCD4-5_HUMAN Isoform of O60343, Isoform 5 of TBC1 domain family member 4 OS=Homo sapiens OX=9606 GN=TBC1D4 PE=1 S	2	2	2	1	1	1	1	0	1	1	1	0	0	0	1	0	6.3	6.3	3.2	53.85	462	462;515	0.0019662	2.1701	4.0094	5.4514	123.97	3	2	Plateau	0.64441	0.67673	4.1443	NaN	0.60126	0.71853	5.5961	NaN
MAGOH;MAGOHB	Protein mago nashi homolog	1.1509	0.71824	NaN	NaN	P61326;P61326-2;F5H6P7;F5H3U9	P61326;P61326-2;F5H6P7	7;6;4;1	1;1;0;0	1;1;0;0	sp|P61326|MGN_HUMAN Protein mago nashi homolog OS=Homo sapiens OX=9606 GN=MAGOH PE=1 SV=1;sp|P61326-2|MGN-2_HUMAN Isoform of P61326, Isoform 2 of Protein mago nashi homolog OS=Homo sapiens OX=9606 GN=MAGOH PE=1 SV=1;tr|F5H6P7|F5H6P7_HUMAN Isoform of Q96A72	4	7	1	1	3	5	5	3	1	1	0	0	1	1	0	0	53.4	5.5	5.5	17.163	146	146;109;102;44	1	-2	1.038	0.90919	33.341	2	0	Median	1.1491	0.93764	NaN	NaN	1.1509	0.71824	NaN	NaN
	Uncharacterized protein DKFZp434B061	NaN	0.71654	NaN	NaN	Q9UF83	Q9UF83	1	1	1	sp|Q9UF83|YM012_HUMAN Uncharacterized protein DKFZp434B061 OS=Homo sapiens OX=9606 PE=2 SV=2	1	1	1	1	0	1	0	0	0	1	0	0	0	1	0	0	1.6	1.6	1.6	59.411	564	564	0.0095983	1.4549	0.68094	0.71654	NaN	1	0	Median	NaN	0.68094	NaN	NaN	NaN	0.71654	NaN	NaN
DYNC1LI2	Cytoplasmic dynein 1 light intermediate chain 2	0.69993	0.71248	0.75917	NaN	O43237-2;O43237;J3KRI4;H3BUM4	O43237-2;O43237;J3KRI4;H3BUM4	2;2;1;1	2;2;1;1	2;2;1;1	sp|O43237-2|DC1L2-2_HUMAN Isoform of O43237, Isoform 2 of Cytoplasmic dynein 1 light intermediate chain 2 OS=Homo sapiens OX=9606 GN=DYNC1LI2 PE=1 SV=1;sp|O43237|DC1L2_HUMAN Cytoplasmic dynein 1 light intermediate chain 2 OS=Homo sapiens OX=9606 GN=DYNC1LI	4	2	2	2	2	1	2	0	2	1	2	0	2	1	2	0	5.8	5.8	5.8	45.004	415	415;492;167;186	0	4.7556	0.64199	0.70712	1.0664	5	0	Leave out requantified	0.76643	0.68173	0.54097	NaN	0.69993	0.71248	0.75917	NaN
SLC25A4	ADP/ATP translocase 1	NaN	0.71059	NaN	NaN	P12235;V9GYG0	P12235;V9GYG0	9;8	2;2	2;2	sp|P12235|ADT1_HUMAN ADP/ATP translocase 1 OS=Homo sapiens OX=9606 GN=SLC25A4 PE=1 SV=4;tr|V9GYG0|V9GYG0_HUMAN Isoform of P12235, ADP/ATP translocase 1 OS=Homo sapiens OX=9606 GN=SLC25A4 PE=1 SV=1	2	9	2	2	4	8	7	7	0	2	0	0	0	2	0	0	22.8	6	6	33.064	298	298;208	0.00082001	2.4737	0.7717	0.71059	17.249	2	0	Median	NaN	0.7717	NaN	NaN	NaN	0.71059	NaN	NaN
COG4	Conserved oligomeric Golgi complex subunit 4	0.91154	0.70949	1.0476	NaN	A0A0A0MS45;J3KNI1;Q9H9E3-3;Q9H9E3;H3BQB2;Q9H9E3-2	A0A0A0MS45;J3KNI1;Q9H9E3-3;Q9H9E3	3;3;3;3;1;1	3;3;3;3;1;1	3;3;3;3;1;1	tr|A0A0A0MS45|A0A0A0MS45_HUMAN Isoform of Q9H9E3, Conserved oligomeric Golgi complex subunit 4 OS=Homo sapiens OX=9606 GN=COG4 PE=1 SV=1;tr|J3KNI1|J3KNI1_HUMAN Isoform of Q9H9E3, Conserved oligomeric Golgi complex subunit 4 OS=Homo sapiens OX=9606 GN=COG4	6	3	3	3	3	2	2	0	3	2	2	0	3	2	2	0	5.7	5.7	5.7	87.183	768	768;789;712;785;143;337	0	22.51	0.83361	1.0044	27.923	8	0	Leave out requantified	0.97984	0.65594	0.79571	NaN	0.91154	0.70949	1.0476	NaN
USP32;USP6	Ubiquitin carboxyl-terminal hydrolase;Ubiquitin carboxyl-terminal hydrolase 32;Ubiquitin carboxyl-terminal hydrolase 6	NaN	0.70942	2.3486	NaN	K7EQL6;Q8NFA0;P35125-2;P35125	K7EQL6;Q8NFA0;P35125-2;P35125	2;2;1;1	2;2;1;1	2;2;1;1	tr|K7EQL6|K7EQL6_HUMAN Isoform of Q8NFA0, Ubiquitin carboxyl-terminal hydrolase 32 OS=Homo sapiens OX=9606 GN=USP32 PE=1 SV=1;sp|Q8NFA0|UBP32_HUMAN Ubiquitin carboxyl-terminal hydrolase 32 OS=Homo sapiens OX=9606 GN=USP32 PE=1 SV=1;sp|P35125-2|UBP6-2_HUMAN	4	2	2	2	0	1	1	0	0	1	1	0	0	1	1	0	1.9	1.9	1.9	143.94	1274	1274;1604;1089;1406	0.0045062	1.8416	1.0129	1.2908	84.65	2	1	Median	NaN	0.6762	1.5171	NaN	NaN	0.70942	2.3486	NaN
XRCC3	DNA repair protein XRCC3	1.0798	0.70039	NaN	NaN	G3V3Q2;O43542	G3V3Q2;O43542	1;1	1;1	1;1	tr|G3V3Q2|G3V3Q2_HUMAN Isoform of O43542, DNA repair protein XRCC3 OS=Homo sapiens OX=9606 GN=XRCC3 PE=1 SV=1;sp|O43542|XRCC3_HUMAN DNA repair protein XRCC3 OS=Homo sapiens OX=9606 GN=XRCC3 PE=1 SV=1	2	1	1	1	1	1	0	0	1	1	0	0	1	1	0	0	8.5	8.5	8.5	15.147	141	141;346	0.00042845	2.9233	0.86373	0.86963	30.608	2	0	Median	1.1073	0.67377	NaN	NaN	1.0798	0.70039	NaN	NaN
MRPS33	28S ribosomal protein S33, mitochondrial	NaN	0.69926	NaN	NaN	Q9Y291;C9JBY7	Q9Y291;C9JBY7	2;1	2;1	2;1	sp|Q9Y291|RT33_HUMAN 28S ribosomal protein S33, mitochondrial OS=Homo sapiens OX=9606 GN=MRPS33 PE=1 SV=1;tr|C9JBY7|C9JBY7_HUMAN Isoform of Q9Y291, 28S ribosomal protein S33, mitochondrial OS=Homo sapiens OX=9606 GN=MRPS33 PE=1 SV=1	2	2	2	2	0	2	0	0	0	2	0	0	0	2	0	0	17	17	17	12.629	106	106;96	0.0019623	2.1509	0.89388	0.69926	15.888	2	0	Median	NaN	0.89388	NaN	NaN	NaN	0.69926	NaN	NaN
DNAJC8	DnaJ homolog subfamily C member 8	0.90522	0.6976	0.93244	NaN	O75937;S4R3J5	O75937	3;1	3;1	3;1	sp|O75937|DNJC8_HUMAN DnaJ homolog subfamily C member 8 OS=Homo sapiens OX=9606 GN=DNAJC8 PE=1 SV=2	2	3	3	3	3	1	2	0	3	1	2	0	3	1	2	0	14.6	14.6	14.6	29.841	253	253;106	0	5.3966	0.75274	0.88686	5.1002	6	1	Leave out requantified	0.90934	0.8427	0.5842	NaN	0.90522	0.6976	0.93244	NaN
CDC16	Cell division cycle protein 16 homolog	1.3634	0.69504	0.81863	NaN	Q5T8C6;Q13042-4;Q13042-3;Q13042-2;Q13042;A0A3B3ISD2	Q5T8C6;Q13042-4;Q13042-3;Q13042-2;Q13042	3;3;3;3;3;1	3;3;3;3;3;1	3;3;3;3;3;1	tr|Q5T8C6|Q5T8C6_HUMAN Isoform of Q13042, Cell division cycle protein 16 homolog OS=Homo sapiens OX=9606 GN=CDC16 PE=1 SV=1;sp|Q13042-4|CDC16-4_HUMAN Isoform of Q13042, Isoform 4 of Cell division cycle protein 16 homolog OS=Homo sapiens OX=9606 GN=CDC16 PE	6	3	3	3	2	2	2	0	2	2	2	0	2	2	2	0	7.4	7.4	7.4	54.704	475	475;526;568;619;620;539	0	3.5015	0.85674	0.98543	31.062	6	1	Leave out requantified	1.4912	0.64427	0.59392	NaN	1.3634	0.69504	0.81863	NaN
TRIM72	Tripartite motif-containing protein 72	1.3663	0.69129	0.86494	NaN	Q6ZMU5;Q6ZMU5-2	Q6ZMU5	4;1	4;1	4;1	sp|Q6ZMU5|TRI72_HUMAN Tripartite motif-containing protein 72 OS=Homo sapiens OX=9606 GN=TRIM72 PE=1 SV=2	2	4	4	4	3	2	1	0	3	2	1	0	3	2	1	0	11.3	11.3	11.3	52.73	477	477;269	0	6.3047	1.2645	1.2219	34.712	4	0	Leave out requantified	1.4219	0.62534	0.68474	NaN	1.3663	0.69129	0.86494	NaN
PHKB	Phosphorylase b kinase regulatory subunit beta	1.4187	0.69038	1.4198	NaN	Q93100-4;Q93100-3;I3L3F2;H3BV13;I3NHZ9;I3L213;H3BQ89;Q93100-2;Q93100	Q93100-4;Q93100-3;I3L3F2;H3BV13;I3NHZ9;I3L213;H3BQ89;Q93100-2;Q93100	2;2;1;1;1;1;1;1;1	2;2;1;1;1;1;1;1;1	2;2;1;1;1;1;1;1;1	sp|Q93100-4|KPBB-4_HUMAN Isoform of Q93100, Isoform 4 of Phosphorylase b kinase regulatory subunit beta OS=Homo sapiens OX=9606 GN=PHKB PE=1 SV=3;sp|Q93100-3|KPBB-3_HUMAN Isoform of Q93100, Isoform 3 of Phosphorylase b kinase regulatory subunit beta OS=Hom	9	2	2	2	2	1	1	0	2	1	1	0	2	1	1	0	3.1	3.1	3.1	123.82	1086	1086;1093;73;150;187;210;229;1086;1093	0	3.5494	1.1895	1.3937	36.149	4	1	Median	1.5407	0.64305	0.95296	NaN	1.4187	0.69038	1.4198	NaN
MRPL18	39S ribosomal protein L18, mitochondrial	1.4812	0.68933	NaN	NaN	Q9H0U6	Q9H0U6	2	2	2	sp|Q9H0U6|RM18_HUMAN 39S ribosomal protein L18, mitochondrial OS=Homo sapiens OX=9606 GN=MRPL18 PE=1 SV=1	1	2	2	2	2	2	0	0	2	2	0	0	2	2	0	0	12.2	12.2	12.2	20.576	180	180	0.00084567	2.7893	1.0278	0.86542	21.912	4	0	Leave out requantified	1.4693	0.90436	NaN	NaN	1.4812	0.68933	NaN	NaN
		NaN	0.6873	NaN	NaN	REV__E9PJN6;REV__E9PMU0;REV__Q9H0A0-2;REV__Q9H0A0	REV__E9PJN6;REV__E9PMU0;REV__Q9H0A0-2;REV__Q9H0A0	1;1;1;1	1;1;1;1	1;1;1;1	tr|E9PJN6|E9PJN6_HUMAN Isoform of Q9H0A0, RNA cytidine acetyltransferase (Fragment) OS=Homo sapiens OX=9606 GN=NAT10 PE=1 SV=8;tr|E9PMU0|E9PMU0_HUMAN Isoform of Q9H0A0, RNA cytidine acetyltransferase OS=Homo sapiens OX=9606 GN=NAT10 PE=1 SV=1;sp|Q9H0A0-2|N	4	1	1	1	0	1	0	0	0	1	0	0	0	1	0	0	0	0	0	16.729	145	145;288;953;1025	0.003447	1.9796	0.63677	0.6873	NaN	1	0	Median	NaN	0.63677	NaN	NaN	NaN	0.6873	NaN	NaN
SCYL1	N-terminal kinase-like protein	1.3149	0.68625	0.93679	NaN	E9PS17;E9PK59;Q96KG9-5;Q96KG9-3;Q96KG9-4;Q96KG9-6;Q96KG9-2;Q96KG9;A0A0A0MQX4;E9PPN3;H0YCI6;H0YDH0	E9PS17;E9PK59;Q96KG9-5;Q96KG9-3;Q96KG9-4;Q96KG9-6;Q96KG9-2;Q96KG9;A0A0A0MQX4;E9PPN3	3;3;3;3;3;3;3;3;2;2;1;1	3;3;3;3;3;3;3;3;2;2;1;1	3;3;3;3;3;3;3;3;2;2;1;1	tr|E9PS17|E9PS17_HUMAN Isoform of Q96KG9, N-terminal kinase-like protein OS=Homo sapiens OX=9606 GN=SCYL1 PE=1 SV=1;tr|E9PK59|E9PK59_HUMAN Isoform of Q96KG9, N-terminal kinase-like protein OS=Homo sapiens OX=9606 GN=SCYL1 PE=1 SV=1;sp|Q96KG9-5|SCYL1-5_HUMA	12	3	3	3	2	1	2	0	2	1	2	0	2	1	2	0	7.1	7.1	7.1	85.718	775	775;780;626;707;781;787;791;808;270;665;175;280	0	16.095	0.74108	1.0148	33.617	5	2	Median	1.3894	0.66552	0.63828	NaN	1.3149	0.68625	0.93679	NaN
AP1S1	AP-1 complex subunit sigma-1A	1.1562	0.68101	1.1171	NaN	A0A2R8YGH5;H7C1E4;P61966	A0A2R8YGH5;H7C1E4;P61966	1;1;1	1;1;1	1;1;1	tr|A0A2R8YGH5|A0A2R8YGH5_HUMAN Isoform of P61966, AP complex subunit sigma OS=Homo sapiens OX=9606 GN=AP1S1 PE=1 SV=1;tr|H7C1E4|H7C1E4_HUMAN Isoform of P61966, AP complex subunit sigma (Fragment) OS=Homo sapiens OX=9606 GN=AP1S1 PE=1 SV=1;sp|P61966|AP1S1_H	3	1	1	1	1	1	1	0	1	1	1	0	1	1	1	0	10.2	10.2	10.2	18.602	157	157;191;158	0	17.695	0.86722	1.1171	29.617	3	2	Median	1.1665	0.86722	0.62031	NaN	1.1562	0.68101	1.1171	NaN
SPCS3	Signal peptidase complex subunit 3	1.4812	0.68058	NaN	NaN	P61009	P61009	1	1	1	sp|P61009|SPCS3_HUMAN Signal peptidase complex subunit 3 OS=Homo sapiens OX=9606 GN=SPCS3 PE=1 SV=1	1	1	1	1	1	1	0	0	1	1	0	0	1	1	0	0	6.7	6.7	6.7	20.313	180	180	0.00042753	2.8958	1.1728	1.004	54.99	2	0	Median	1.5221	0.90365	NaN	NaN	1.4812	0.68058	NaN	NaN
PPME1	Protein phosphatase methylesterase 1	1.1946	0.67947	4.4927	NaN	Q9Y570;Q9Y570-4;Q9Y570-2;Q9Y570-3	Q9Y570;Q9Y570-4;Q9Y570-2	5;5;4;2	5;5;4;2	5;5;4;2	sp|Q9Y570|PPME1_HUMAN Protein phosphatase methylesterase 1 OS=Homo sapiens OX=9606 GN=PPME1 PE=1 SV=3;sp|Q9Y570-4|PPME1-4_HUMAN Isoform of Q9Y570, Isoform 4 of Protein phosphatase methylesterase 1 OS=Homo sapiens OX=9606 GN=PPME1 PE=1 SV=3;sp|Q9Y570-2|PPME	4	5	5	5	3	3	2	0	3	3	2	0	3	3	2	0	14.5	14.5	14.5	42.315	386	386;400;199;161	0	7.9395	1.2542	1.1811	29.881	6	2	Leave out requantified	1.2895	0.68948	3.5991	NaN	1.1946	0.67947	4.4927	NaN
RAB2A	Ras-related protein Rab-2A	0.97784	0.67084	1.363	NaN	P61019-2;P61019;H7C125;Q6PIK3;E9PKL7;A0A3B3ITL1;Q8WUD1-2;Q8WUD1	P61019-2;P61019	3;3;1;1;1;1;1;1	3;3;1;1;1;1;1;1	3;3;1;1;1;1;1;1	sp|P61019-2|RAB2A-2_HUMAN Isoform of P61019, Isoform 2 of Ras-related protein Rab-2A OS=Homo sapiens OX=9606 GN=RAB2A PE=1 SV=1;sp|P61019|RAB2A_HUMAN Ras-related protein Rab-2A OS=Homo sapiens OX=9606 GN=RAB2A PE=1 SV=1	8	3	3	3	3	3	2	0	3	3	2	0	3	3	2	0	22.9	22.9	22.9	20.847	188	188;212;104;121;181;208;151;216	0	55.943	0.87905	0.87914	8.1522	8	0	Leave out requantified	0.98806	0.87905	0.78901	NaN	0.97784	0.67084	1.363	NaN
NCCRP1	F-box only protein 50	NaN	0.66779	NaN	NaN	Q6ZVX7	Q6ZVX7	2	2	2	sp|Q6ZVX7|FBX50_HUMAN F-box only protein 50 OS=Homo sapiens OX=9606 GN=NCCRP1 PE=1 SV=1	1	2	2	2	0	2	0	0	0	2	0	0	0	2	0	0	7.6	7.6	7.6	30.847	275	275	0	4.3148	0.82977	0.66779	NaN	1	1	Median	NaN	0.82977	NaN	NaN	NaN	0.66779	NaN	NaN
SUMF2	Sulfatase-modifying factor 2	0.71637	0.66758	1.1345	NaN	F8WEV7;C9JL30;C9J660;J3KQJ1;A0A494C1B1;H7C3B2;F8WES7;A8MXB9;J3QT17;E9PBT8;E9PG02;F8WEX5;F8WA42;Q8NBJ7;Q8NBJ7-5;Q8NBJ7-4;Q8NBJ7-3	F8WEV7;C9JL30;C9J660;J3KQJ1;A0A494C1B1;H7C3B2;F8WES7;A8MXB9;J3QT17;E9PBT8;E9PG02;F8WEX5;F8WA42;Q8NBJ7;Q8NBJ7-5;Q8NBJ7-4;Q8NBJ7-3	1;1;1;1;1;1;1;1;1;1;1;1;1;1;1;1;1	1;1;1;1;1;1;1;1;1;1;1;1;1;1;1;1;1	1;1;1;1;1;1;1;1;1;1;1;1;1;1;1;1;1	tr|F8WEV7|F8WEV7_HUMAN Isoform of Q8NBJ7, Inactive C-alpha-formylglycine-generating enzyme 2 OS=Homo sapiens OX=9606 GN=SUMF2 PE=1 SV=1;tr|C9JL30|C9JL30_HUMAN Isoform of Q8NBJ7, Inactive C-alpha-formylglycine-generating enzyme 2 (Fragment) OS=Homo sapiens	17	1	1	1	1	1	1	0	1	1	1	0	1	1	1	0	16.7	16.7	16.7	10.87	102	102;274;352;320;305;304;150;286;236;232;183;165;358;301;217;321;339	0	16.654	0.73435	1.0601	28.799	3	0	Plateau	0.72073	0.73435	0.76155	NaN	0.71637	0.66758	1.1345	NaN
TALDO1	Transaldolase	0.79358	0.66668	1.3466	NaN	P37837;F2Z393	P37837;F2Z393	6;5	6;5	6;5	sp|P37837|TALDO_HUMAN Transaldolase OS=Homo sapiens OX=9606 GN=TALDO1 PE=1 SV=2;tr|F2Z393|F2Z393_HUMAN Isoform of P37837, Transaldolase OS=Homo sapiens OX=9606 GN=TALDO1 PE=1 SV=1	2	6	6	6	5	1	5	0	5	1	5	0	5	1	5	0	21.1	21.1	21.1	37.54	337	337;318	0	9.0888	0.78986	1.0588	16.609	10	0	Leave out requantified	0.82145	0.67804	0.77817	NaN	0.79358	0.66668	1.3466	NaN
MAP3K5	Mitogen-activated protein kinase kinase kinase 5	NaN	0.66656	NaN	NaN	Q99683	Q99683	1	1	1	sp|Q99683|M3K5_HUMAN Mitogen-activated protein kinase kinase kinase 5 OS=Homo sapiens OX=9606 GN=MAP3K5 PE=1 SV=1	1	1	1	1	0	1	0	0	0	1	0	0	0	1	0	0	0.7	0.7	0.7	154.54	1374	1374	0.0099115	1.44	0.62692	0.66656	NaN	1	0	Median	NaN	0.62692	NaN	NaN	NaN	0.66656	NaN	NaN
GPT2	Alanine aminotransferase 2	NaN	0.66469	NaN	NaN	H3BU54;Q8TD30	H3BU54;Q8TD30	1;1	1;1	1;1	tr|H3BU54|H3BU54_HUMAN Isoform of Q8TD30, Alanine aminotransferase 2 (Fragment) OS=Homo sapiens OX=9606 GN=GPT2 PE=1 SV=1;sp|Q8TD30|ALAT2_HUMAN Alanine aminotransferase 2 OS=Homo sapiens OX=9606 GN=GPT2 PE=1 SV=1	2	1	1	1	0	1	1	0	0	1	1	0	0	1	1	0	10.2	10.2	10.2	19.285	177	177;523	0	8.1362	0.59169	0.66469	NaN	1	0	Median	NaN	0.59169	NaN	NaN	NaN	0.66469	NaN	NaN
GRPEL1	GrpE protein homolog 1, mitochondrial	1.3306	0.66287	1.4365	NaN	Q9HAV7	Q9HAV7	3	3	3	sp|Q9HAV7|GRPE1_HUMAN GrpE protein homolog 1, mitochondrial OS=Homo sapiens OX=9606 GN=GRPEL1 PE=1 SV=2	1	3	3	3	3	2	2	0	3	2	2	0	3	2	2	0	18	18	18	24.279	217	217	0	6.0295	0.88372	1.178	26.373	8	0	Leave out requantified	1.375	0.73992	0.78802	NaN	1.3306	0.66287	1.4365	NaN
NLRP2;NLRP7	NACHT, LRR and PYD domains-containing protein 2;NACHT, LRR and PYD domains-containing protein 7	1.2657	0.65931	1.2095	NaN	A0A0G2JPQ2;Q9NX02;A0A0G2JLQ8;A0A0G2JP37;A0A0G2JNC8;A0A0G2JPB6;A0A0G2JMG8;A0A0G2JLX3;J3KN39;Q9NX02-2;Q9NX02-3;Q9NX02-5;Q9NX02-4;A0A0G2JNK3;A0A0G2JPH3;A0A0G2JMB6;K7ERG0;A0A0G2JNK1;A0A0G2JM25;Q8WX94-3;Q8WX94;Q8WX94-2	A0A0G2JPQ2;Q9NX02;A0A0G2JLQ8;A0A0G2JP37;A0A0G2JNC8;A0A0G2JPB6;A0A0G2JMG8;A0A0G2JLX3;J3KN39;Q9NX02-2;Q9NX02-3;Q9NX02-5;Q9NX02-4;A0A0G2JNK3;A0A0G2JPH3;A0A0G2JMB6;K7ERG0;A0A0G2JNK1;A0A0G2JM25;Q8WX94-3;Q8WX94;Q8WX94-2	2;2;2;2;2;2;2;2;2;2;2;2;2;1;1;1;1;1;1;1;1;1	2;2;2;2;2;2;2;2;2;2;2;2;2;1;1;1;1;1;1;1;1;1	2;2;2;2;2;2;2;2;2;2;2;2;2;1;1;1;1;1;1;1;1;1	tr|A0A0G2JPQ2|A0A0G2JPQ2_HUMAN NACHT, LRR and PYD domains-containing protein 2 OS=Homo sapiens OX=9606 GN=NLRP2 PE=1 SV=1;sp|Q9NX02|NALP2_HUMAN NACHT, LRR and PYD domains-containing protein 2 OS=Homo sapiens OX=9606 GN=NLRP2 PE=1 SV=1;tr|A0A0G2JLQ8|A0A0G2J	22	2	2	2	1	1	2	0	1	1	2	0	1	1	2	0	1.8	1.8	1.8	120.48	1062	1062;1062;879;881;903;846;1039;1040;1059;1040;846;1039;1038;1037;1009;980;963;952;935;1037;980;1009	0.0083153	1.5655	0.78405	1.1992	7.64	4	0	Leave out requantified	1.3937	0.6357	0.78405	NaN	1.2657	0.65931	1.2095	NaN
TUBGCP6	Gamma-tubulin complex component 6	1.147	0.65342	0.99063	NaN	Q96RT7-2;Q96RT7-3;Q96RT7;E7EQL8;H7C358	Q96RT7-2;Q96RT7-3;Q96RT7;E7EQL8	3;3;3;2;1	3;3;3;2;1	3;3;3;2;1	sp|Q96RT7-2|GCP6-2_HUMAN Isoform of Q96RT7, Isoform 2 of Gamma-tubulin complex component 6 OS=Homo sapiens OX=9606 GN=TUBGCP6 PE=1 SV=3;sp|Q96RT7-3|GCP6-3_HUMAN Isoform of Q96RT7, Isoform 3 of Gamma-tubulin complex component 6 OS=Homo sapiens OX=9606 GN=TU	5	3	3	3	3	1	1	0	3	1	1	0	3	1	1	0	2.9	2.9	2.9	196.76	1785	1785;1802;1819;1493;277	0	6.6757	0.97719	0.99479	8.344	5	0	Leave out requantified	1.16	0.61349	0.73941	NaN	1.147	0.65342	0.99063	NaN
EDC3	Enhancer of mRNA-decapping protein 3	0.94247	0.65113	0.93488	NaN	Q96F86;H3BQ37;H3BPN4;H3BPW9;H3BTD6;H3BQP5;H3BU87;H3BSQ0	Q96F86	5;2;2;2;1;1;1;1	5;2;2;2;1;1;1;1	5;2;2;2;1;1;1;1	sp|Q96F86|EDC3_HUMAN Enhancer of mRNA-decapping protein 3 OS=Homo sapiens OX=9606 GN=EDC3 PE=1 SV=1	8	5	5	5	3	2	2	1	3	2	2	1	3	2	2	1	13.6	13.6	13.6	56.077	508	508;177;213;253;68;123;131;163	0	4.602	0.89711	0.85709	36.251	6	3	Median	1.0123	0.62667	0.74509	NaN	0.94247	0.65113	0.93488	NaN
YIF1B	Protein YIF1B	1.1086	0.65095	NaN	NaN	K7EPQ7;Q5BJH7-2;Q5BJH7-6;Q5BJH7-3;Q5BJH7	K7EPQ7;Q5BJH7-2;Q5BJH7-6;Q5BJH7-3;Q5BJH7	1;1;1;1;1	1;1;1;1;1	1;1;1;1;1	tr|K7EPQ7|K7EPQ7_HUMAN Isoform of Q5BJH7, Protein YIF1B OS=Homo sapiens OX=9606 GN=YIF1B PE=1 SV=1;sp|Q5BJH7-2|YIF1B-2_HUMAN Isoform of Q5BJH7, Isoform 2 of Protein YIF1B OS=Homo sapiens OX=9606 GN=YIF1B PE=1 SV=1;sp|Q5BJH7-6|YIF1B-6_HUMAN Isoform of Q5BJH	5	1	1	1	1	1	0	0	1	1	0	0	1	1	0	0	5.2	5.2	5.2	26.924	248	248;283;299;311;314	0.0072939	1.6072	0.8916	0.84951	37.65	2	0	Median	1.1197	0.71	NaN	NaN	1.1086	0.65095	NaN	NaN
DSCC1	Sister chromatid cohesion protein DCC1	0.78448	0.64935	0.71846	NaN	Q9BVC3	Q9BVC3	1	1	1	sp|Q9BVC3|DCC1_HUMAN Sister chromatid cohesion protein DCC1 OS=Homo sapiens OX=9606 GN=DSCC1 PE=1 SV=2	1	1	1	1	1	1	1	0	1	1	1	0	1	1	1	0	3.8	3.8	3.8	44.825	393	393	0.0019802	2.2188	0.65613	0.75173	9.4602	3	0	Plateau	0.83894	0.65613	0.59678	NaN	0.78448	0.64935	0.71846	NaN
SUCLG1	Succinyl-CoA ligase [ADP/GDP-forming] subunit alpha, mitochondrial	1.0132	0.64874	1.2576	NaN	A0A494C0D1;P53597	A0A494C0D1;P53597	2;2	2;2	2;2	tr|A0A494C0D1|A0A494C0D1_HUMAN Isoform of P53597, Succinate--CoA ligase [ADP/GDP-forming] subunit alpha, mitochondrial OS=Homo sapiens OX=9606 GN=SUCLG1 PE=4 SV=1;sp|P53597|SUCA_HUMAN Succinate--CoA ligase [ADP/GDP-forming] subunit alpha, mitochondrial OS=	2	2	2	2	2	1	1	0	2	1	1	0	2	1	1	0	14.7	14.7	14.7	22.458	211	211;346	0	3.7472	0.86313	0.91289	30.026	5	1	Leave out requantified	1.0643	0.77424	0.75335	NaN	1.0132	0.64874	1.2576	NaN
SDHA	Succinate dehydrogenase [ubiquinone] flavoprotein subunit, mitochondrial	2.0635	0.6468	0.83428	NaN	A0A087X1I3;D6RFM5;P31040-3;P31040-2;P31040	A0A087X1I3;D6RFM5;P31040-3;P31040-2;P31040	1;1;1;1;1	1;1;1;1;1	1;1;1;1;1	tr|A0A087X1I3|A0A087X1I3_HUMAN Isoform of P31040, Succinate dehydrogenase [ubiquinone] flavoprotein subunit, mitochondrial OS=Homo sapiens OX=9606 GN=SDHA PE=1 SV=1;tr|D6RFM5|D6RFM5_HUMAN Isoform of P31040, Succinate dehydrogenase [ubiquinone] flavoprotein	5	1	1	1	1	1	1	0	1	1	1	0	1	1	1	0	2.9	2.9	2.9	56.662	519	519;583;519;616;664	0.0034443	1.975	0.6561	0.83428	60.976	3	0	Median	2.1671	0.6561	0.61264	NaN	2.0635	0.6468	0.83428	NaN
TRIM5	Tripartite motif-containing protein 5	NaN	0.6449	NaN	NaN	A0A2U3TZJ3;H7C134;Q9C035-6;Q9C035-5;Q9C035-4;Q9C035-3;Q9C035-2;Q9C035;E7EQQ5	A0A2U3TZJ3;H7C134;Q9C035-6;Q9C035-5;Q9C035-4;Q9C035-3;Q9C035-2;Q9C035;E7EQQ5	2;2;2;2;2;2;2;2;1	2;2;2;2;2;2;2;2;1	2;2;2;2;2;2;2;2;1	tr|A0A2U3TZJ3|A0A2U3TZJ3_HUMAN Uncharacterized protein (Fragment) OS=Homo sapiens OX=9606 PE=4 SV=1;tr|H7C134|H7C134_HUMAN Isoform of Q9C035, Tripartite motif-containing protein 5 (Fragment) OS=Homo sapiens OX=9606 GN=TRIM5 PE=1 SV=1;sp|Q9C035-6|TRIM5-6_HU	9	2	2	2	0	2	0	1	0	2	0	1	0	2	0	1	35	35	35	9.5084	80	80;187;257;271;326;347;400;493;209	0	17.789	0.56445	0.6449	1.101	2	1	Median	NaN	0.56445	NaN	NaN	NaN	0.6449	NaN	NaN
SEC22B	Vesicle-trafficking protein SEC22b	0.99326	0.64289	1.2598	NaN	A0A087X1A9;O75396	A0A087X1A9;O75396	2;2	2;2	2;2	tr|A0A087X1A9|A0A087X1A9_HUMAN Isoform of O75396, Vesicle-trafficking protein SEC22b (Fragment) OS=Homo sapiens OX=9606 GN=SEC22B PE=1 SV=1;sp|O75396|SC22B_HUMAN Vesicle-trafficking protein SEC22b OS=Homo sapiens OX=9606 GN=SEC22B PE=1 SV=4	2	2	2	2	2	2	1	1	2	2	1	1	2	2	1	1	32.9	32.9	32.9	8.7819	79	79;215	0	9.6422	0.85709	0.9905	23.616	7	0	Leave out requantified	1.004	0.76372	0.77766	NaN	0.99326	0.64289	1.2598	NaN
HEXB	Beta-hexosaminidase subunit beta;Beta-hexosaminidase subunit beta chain B;Beta-hexosaminidase subunit beta chain A	1.0821	0.6427	NaN	NaN	P07686;D6REQ8;H0Y9B6;Q5URX0	P07686;D6REQ8;H0Y9B6;Q5URX0	2;1;1;1	2;1;1;1	2;1;1;1	sp|P07686|HEXB_HUMAN Beta-hexosaminidase subunit beta OS=Homo sapiens OX=9606 GN=HEXB PE=1 SV=3;tr|D6REQ8|D6REQ8_HUMAN Isoform of P07686, Beta-hexosaminidase subunit beta OS=Homo sapiens OX=9606 GN=HEXB PE=1 SV=1;tr|H0Y9B6|H0Y9B6_HUMAN Isoform of P07686, B	4	2	2	2	1	1	1	0	1	1	1	0	1	1	1	0	5.4	5.4	5.4	63.111	556	556;35;202;331	0	3.8674	0.8388	0.83394	36.84	2	0	Median	1.1395	0.61743	NaN	NaN	1.0821	0.6427	NaN	NaN
RAB6B;RAB6A;RAB39A	Ras-related protein Rab-6A;Ras-related protein Rab-6B;Ras-related protein Rab-39A	0.96627	0.64164	1.1567	NaN	C9JU14;J3KR73;P20340-4;Q9NRW1-2;Q9NRW1;P20340-2;P20340;C9JB90;Q14964	C9JU14;J3KR73;P20340-4;Q9NRW1-2;Q9NRW1;P20340-2;P20340;C9JB90;Q14964	2;2;2;2;2;2;2;1;1	2;2;2;2;2;2;2;1;1	2;2;2;2;2;2;2;1;1	tr|C9JU14|C9JU14_HUMAN Isoform of Q9NRW1, Ras-related protein Rab-6B (Fragment) OS=Homo sapiens OX=9606 GN=RAB6B PE=1 SV=3;tr|J3KR73|J3KR73_HUMAN Isoform of Q9NRW1, Ras-related protein Rab-6B (Fragment) OS=Homo sapiens OX=9606 GN=RAB6B PE=1 SV=1;sp|P20340-	9	2	2	2	2	1	2	0	2	1	2	0	2	1	2	0	27.7	27.7	27.7	9.6668	83	83;124;175;195;208;208;208;49;217	0	5.1336	0.79276	1.0005	7.6416	5	0	Leave out requantified	0.97683	0.82401	0.65196	NaN	0.96627	0.64164	1.1567	NaN
MCAT	Malonyl-CoA-acyl carrier protein transacylase, mitochondrial	NaN	0.64151	NaN	NaN	Q8IVS2	Q8IVS2	1	1	1	sp|Q8IVS2|FABD_HUMAN Malonyl-CoA-acyl carrier protein transacylase, mitochondrial OS=Homo sapiens OX=9606 GN=MCAT PE=1 SV=2	1	1	1	1	0	1	0	0	0	1	0	0	0	1	0	0	3.6	3.6	3.6	42.961	390	390	0	5.2069	0.65088	0.64151	NaN	1	0	Median	NaN	0.65088	NaN	NaN	NaN	0.64151	NaN	NaN
PSMG2	Proteasome assembly chaperone 2	0.99875	0.64065	2.0987	NaN	Q969U7-2;Q969U7;V9GZ55;K7ENR6	Q969U7-2;Q969U7;V9GZ55;K7ENR6	2;2;1;1	2;2;1;1	2;2;1;1	sp|Q969U7-2|PSMG2-2_HUMAN Isoform of Q969U7, Isoform 2 of Proteasome assembly chaperone 2 OS=Homo sapiens OX=9606 GN=PSMG2 PE=1 SV=1;sp|Q969U7|PSMG2_HUMAN Proteasome assembly chaperone 2 OS=Homo sapiens OX=9606 GN=PSMG2 PE=1 SV=1;tr|V9GZ55|V9GZ55_HUMAN Iso	4	2	2	2	1	1	2	0	1	1	2	0	1	1	2	0	10.3	10.3	10.3	26.321	233	233;264;209;240	0.00082237	2.5096	1.0411	0.99875	59.952	3	0	Median	1.0411	0.77275	1.1549	NaN	0.99875	0.64065	2.0987	NaN
CDC42	Cell division control protein 42 homolog	0.95299	0.63816	NaN	NaN	P60953;P60953-1	P60953;P60953-1	2;1	2;1	2;1	sp|P60953|CDC42_HUMAN Cell division control protein 42 homolog OS=Homo sapiens OX=9606 GN=CDC42 PE=1 SV=2;sp|P60953-1|CDC42-1_HUMAN Isoform of P60953, Isoform 1 of Cell division control protein 42 homolog OS=Homo sapiens OX=9606 GN=CDC42 PE=1 SV=2	2	2	2	2	1	1	0	0	1	1	0	0	1	1	0	0	11	11	11	21.258	191	191;191	0.00084459	2.7579	0.86852	0.77984	28.356	2	0	Median	0.97794	0.77135	NaN	NaN	0.95299	0.63816	NaN	NaN
SACM1L	Phosphatidylinositide phosphatase SAC1	0.64069	0.63551	0.61413	NaN	E9PGZ4;Q9NTJ5-2;Q9NTJ5;F8WDN7;C9J3E3;C9JV50	E9PGZ4;Q9NTJ5-2;Q9NTJ5;F8WDN7	4;4;4;3;1;1	4;4;4;3;1;1	4;4;4;3;1;1	tr|E9PGZ4|E9PGZ4_HUMAN Isoform of Q9NTJ5, Phosphatidylinositide phosphatase SAC1 OS=Homo sapiens OX=9606 GN=SACM1L PE=1 SV=1;sp|Q9NTJ5-2|SAC1-2_HUMAN Isoform of Q9NTJ5, Isoform 2 of Phosphatidylinositide phosphatase SAC1 OS=Homo sapiens OX=9606 GN=SACM1L P	6	4	4	4	1	1	2	0	1	1	2	0	1	1	2	0	9.3	9.3	9.3	55.571	484	484;526;587;287;112;187	0	3.8935	0.56835	0.63551	2.2469	3	0	Leave out requantified	0.7037	0.56835	0.45803	NaN	0.64069	0.63551	0.61413	NaN
SNX1	Sorting nexin-1	NaN	0.6354	0.76084	NaN	Q13596-2;Q13596;H0YK42;Q13596-3	Q13596-2;Q13596;H0YK42;Q13596-3	5;5;4;4	3;3;2;3	3;3;2;3	sp|Q13596-2|SNX1-2_HUMAN Isoform of Q13596, Isoform 1A of Sorting nexin-1 OS=Homo sapiens OX=9606 GN=SNX1 PE=1 SV=3;sp|Q13596|SNX1_HUMAN Sorting nexin-1 OS=Homo sapiens OX=9606 GN=SNX1 PE=1 SV=3;tr|H0YK42|H0YK42_HUMAN Isoform of Q13596, Sorting nexin-1 OS=	4	5	3	3	2	3	3	2	0	2	2	0	0	2	2	0	13.3	8.8	8.8	51.812	457	457;522;304;557	0	3.8952	0.56334	0.6953	12.739	2	1	Median	NaN	0.61539	0.5157	NaN	NaN	0.6354	0.76084	NaN
PITRM1	Presequence protease, mitochondrial	1.5462	0.63349	NaN	NaN	Q5JRX3-3;Q5JRX3;Q5JRX3-2	Q5JRX3-3;Q5JRX3;Q5JRX3-2	1;1;1	1;1;1	1;1;1	sp|Q5JRX3-3|PREP-3_HUMAN Isoform of Q5JRX3, Isoform 3 of Presequence protease, mitochondrial OS=Homo sapiens OX=9606 GN=PITRM1 PE=1 SV=3;sp|Q5JRX3|PREP_HUMAN Presequence protease, mitochondrial OS=Homo sapiens OX=9606 GN=PITRM1 PE=1 SV=3;sp|Q5JRX3-2|PREP-2	3	1	1	1	1	1	0	0	1	1	0	0	1	1	0	0	1.5	1.5	1.5	106.06	939	939;1037;1038	0.0089509	1.5003	0.99367	0.9897	63.097	2	1	Median	1.6671	0.59228	NaN	NaN	1.5462	0.63349	NaN	NaN
MRPS6	28S ribosomal protein S6, mitochondrial	NaN	0.63039	NaN	NaN	P82932	P82932	1	1	1	sp|P82932|RT06_HUMAN 28S ribosomal protein S6, mitochondrial OS=Homo sapiens OX=9606 GN=MRPS6 PE=1 SV=3	1	1	1	1	0	1	0	0	0	1	0	0	0	1	0	0	10.4	10.4	10.4	14.226	125	125	0	4.2758	0.84568	0.63039	NaN	1	0	Median	NaN	0.84568	NaN	NaN	NaN	0.63039	NaN	NaN
ATP6V1A	V-type proton ATPase catalytic subunit A	NaN	0.63011	1.3396	NaN	P38606-2;P38606;C9JA17;C9JVW8	P38606-2;P38606	4;4;1;1	4;4;1;1	4;4;1;1	sp|P38606-2|VATA-2_HUMAN Isoform of P38606, Isoform 2 of V-type proton ATPase catalytic subunit A OS=Homo sapiens OX=9606 GN=ATP6V1A PE=1 SV=2;sp|P38606|VATA_HUMAN V-type proton ATPase catalytic subunit A OS=Homo sapiens OX=9606 GN=ATP6V1A PE=1 SV=2	4	4	4	4	0	3	3	0	0	3	3	0	0	3	3	0	9.2	9.2	9.2	64.735	584	584;617;184;221	0	5.8509	0.84492	0.92905	36.782	6	3	Leave out requantified	NaN	0.5681	0.90506	NaN	NaN	0.63011	1.3396	NaN
GEMIN6	Gem-associated protein 6	NaN	0.62508	NaN	NaN	Q8WXD5;B9A037;B8ZZ85	Q8WXD5	3;1;1	3;1;1	3;1;1	sp|Q8WXD5|GEMI6_HUMAN Gem-associated protein 6 OS=Homo sapiens OX=9606 GN=GEMIN6 PE=1 SV=1	3	3	3	3	1	3	1	1	1	3	1	1	1	3	1	1	22.2	22.2	22.2	18.824	167	167;69;111	0	24.72	0.79054	0.62508	2.8682	2	0	Median	NaN	0.79054	NaN	NaN	NaN	0.62508	NaN	NaN
DYNLL1	Dynein light chain 1, cytoplasmic	1.1637	0.6205	1.4437	NaN	P63167;F8VXL2;F8VRV5;F8VXI7	P63167;F8VXL2;F8VRV5	4;2;2;1	4;2;2;1	2;2;2;1	sp|P63167|DYL1_HUMAN Dynein light chain 1, cytoplasmic OS=Homo sapiens OX=9606 GN=DYNLL1 PE=1 SV=1;tr|F8VXL2|F8VXL2_HUMAN Isoform of P63167, Dynein light chain OS=Homo sapiens OX=9606 GN=DYNLL1 PE=1 SV=1;tr|F8VRV5|F8VRV5_HUMAN Isoform of P63167, Dynein lig	4	4	4	2	2	4	3	0	2	4	3	0	1	2	2	0	62.9	62.9	38.2	10.366	89	89;47;67;42	0	73.376	0.77736	1.0147	33.262	11	1	Leave out requantified	1.1701	0.65916	0.79624	NaN	1.1637	0.6205	1.4437	NaN
HMGA1	High mobility group protein HMG-I/HMG-Y	1.1718	0.61902	0.45576	NaN	P17096;P17096-3;P17096-2	P17096;P17096-3	3;2;1	3;2;1	3;2;1	sp|P17096|HMGA1_HUMAN High mobility group protein HMG-I/HMG-Y OS=Homo sapiens OX=9606 GN=HMGA1 PE=1 SV=3;sp|P17096-3|HMGA1-3_HUMAN Isoform of P17096, Isoform HMG-R of High mobility group protein HMG-I/HMG-Y OS=Homo sapiens OX=9606 GN=HMGA1 PE=1 SV=3	3	3	3	3	2	2	3	0	2	2	3	0	2	2	3	0	41.1	41.1	41.1	11.676	107	107;179;96	0	77.016	0.90505	0.83962	36.364	10	1	Leave out requantified	1.1612	0.71365	0.36261	NaN	1.1718	0.61902	0.45576	NaN
ACBD6	Acyl-CoA-binding domain-containing protein 6	1.5099	0.61797	NaN	NaN	A0A2R8Y544;Q9BR61	A0A2R8Y544;Q9BR61	2;2	2;2	2;2	tr|A0A2R8Y544|A0A2R8Y544_HUMAN Isoform of Q9BR61, Acyl-CoA-binding domain-containing protein 6 OS=Homo sapiens OX=9606 GN=ACBD6 PE=1 SV=1;sp|Q9BR61|ACBD6_HUMAN Acyl-CoA-binding domain-containing protein 6 OS=Homo sapiens OX=9606 GN=ACBD6 PE=1 SV=1	2	2	2	2	1	2	1	0	1	2	1	0	1	2	1	0	11.4	11.4	11.4	28.129	255	255;282	0.0072727	1.5975	1.0376	0.96595	63.168	2	2	Median	1.5699	0.68578	NaN	NaN	1.5099	0.61797	NaN	NaN
CCDC168	Coiled-coil domain-containing protein 168	NaN	0.61794	NaN	NaN	Q8NDH2	Q8NDH2	1	1	1	sp|Q8NDH2|CC168_HUMAN Coiled-coil domain-containing protein 168 OS=Homo sapiens OX=9606 GN=CCDC168 PE=2 SV=2	1	1	1	1	0	1	0	0	0	1	0	0	0	1	0	0	0.4	0.4	0.4	277.95	2452	2452	1	-2	0.62795	0.61794	NaN	1	0	Median	NaN	0.62795	NaN	NaN	NaN	0.61794	NaN	NaN
RAD51C	DNA repair protein RAD51 homolog 3	1.0768	0.61652	1.2165	NaN	Q7KZJ0;J3QKK3;O43502-2;O43502;J3QLB5;E9PI66	Q7KZJ0;J3QKK3;O43502-2;O43502;J3QLB5;E9PI66	2;2;2;2;1;1	2;2;2;2;1;1	2;2;2;2;1;1	tr|Q7KZJ0|Q7KZJ0_HUMAN Isoform of O43502, DNA repair protein RAD51 homolog 3 OS=Homo sapiens OX=9606 GN=RAD51C PE=1 SV=1;tr|J3QKK3|J3QKK3_HUMAN Isoform of O43502, DNA repair protein RAD51 homolog 3 OS=Homo sapiens OX=9606 GN=RAD51C PE=1 SV=1;sp|O43502-2|RA	6	2	2	2	2	1	1	0	2	1	1	0	2	1	1	0	17.2	17.2	17.2	14.697	134	134;346;135;376;47;52	0	3.7287	0.97759	1.0768	6.0169	4	0	Leave out requantified	1.1067	0.589	0.82724	NaN	1.0768	0.61652	1.2165	NaN
CBFB	Core-binding factor subunit beta	NaN	0.60314	0.91418	NaN	J3KS23;A0A494C0A9;Q13951;Q13951-2	J3KS23;A0A494C0A9;Q13951;Q13951-2	1;1;1;1	1;1;1;1	1;1;1;1	tr|J3KS23|J3KS23_HUMAN Isoform of Q13951, Core-binding factor subunit beta OS=Homo sapiens OX=9606 GN=CBFB PE=1 SV=1;tr|A0A494C0A9|A0A494C0A9_HUMAN Isoform of Q13951, Core-binding factor subunit beta OS=Homo sapiens OX=9606 GN=CBFB PE=4 SV=1;sp|Q13951|PEBB	4	1	1	1	0	1	1	0	0	1	1	0	0	1	1	0	19.5	19.5	19.5	9.6798	82	82;223;182;187	0.0041651	1.9092	0.62102	0.74255	29.407	2	2	Median	NaN	0.71454	0.53975	NaN	NaN	0.60314	0.91418	NaN
SHC1	SHC-transforming protein 1	NaN	0.60066	NaN	NaN	Q5T188;H0Y539;X6R6D0;P29353-5;P29353-3;P29353-2;P29353-7;P29353;P29353-6	Q5T188;H0Y539;X6R6D0;P29353-5;P29353-3;P29353-2;P29353-7;P29353;P29353-6	2;2;2;2;2;2;2;2;2	2;2;2;2;2;2;2;2;2	2;2;2;2;2;2;2;2;2	tr|Q5T188|Q5T188_HUMAN Isoform of P29353, SHC-transforming protein 1 (Fragment) OS=Homo sapiens OX=9606 GN=SHC1 PE=1 SV=1;tr|H0Y539|H0Y539_HUMAN Isoform of P29353, SHC-transforming protein 1 (Fragment) OS=Homo sapiens OX=9606 GN=SHC1 PE=1 SV=1;tr|X6R6D0|X6	9	2	2	2	0	2	0	0	0	2	0	0	0	2	0	0	22.5	22.5	22.5	21.522	200	200;297;354;369;428;473;474;583;584	0	3.9846	0.57337	0.60066	NaN	1	1	Median	NaN	0.57337	NaN	NaN	NaN	0.60066	NaN	NaN
SMURF2	E3 ubiquitin-protein ligase SMURF2	1.315	0.59774	NaN	NaN	Q9HAU4;J3QQM4;Q9HCE7-2;Q9HCE7	Q9HAU4	3;1;1;1	3;1;1;1	3;1;1;1	sp|Q9HAU4|SMUF2_HUMAN E3 ubiquitin-protein ligase SMURF2 OS=Homo sapiens OX=9606 GN=SMURF2 PE=1 SV=1	4	3	3	3	2	1	0	0	2	1	0	0	2	1	0	0	4.3	4.3	4.3	86.195	748	748;561;731;757	0.00084782	2.8107	1.3351	1.1965	46.491	3	0	Leave out requantified	1.4632	0.55574	NaN	NaN	1.315	0.59774	NaN	NaN
KIAA1598	Shootin-1	1.4336	0.59139	1.4803	NaN	A0MZ66-5;A0MZ66-6;A0MZ66;A0MZ66-3;A0MZ66-8;A0MZ66-4;A0MZ66-7;A0MZ66-2	A0MZ66-5;A0MZ66-6;A0MZ66;A0MZ66-3;A0MZ66-8;A0MZ66-4;A0MZ66-7;A0MZ66-2	6;6;6;6;5;5;3;3	6;6;6;6;5;5;3;3	6;6;6;6;5;5;3;3	sp|A0MZ66-5|SHOT1-5_HUMAN Isoform of A0MZ66, Isoform 5 of Shootin-1 OS=Homo sapiens OX=9606 GN=SHTN1 PE=1 SV=4;sp|A0MZ66-6|SHOT1-6_HUMAN Isoform of A0MZ66, Isoform 6 of Shootin-1 OS=Homo sapiens OX=9606 GN=SHTN1 PE=1 SV=4;sp|A0MZ66|SHOT1_HUMAN Shootin-1 OS	8	6	6	6	4	2	2	0	4	2	2	0	4	2	2	0	14.4	14.4	14.4	64.519	571	571;601;631;649;498;558;219;456	0	9.6704	1.0202	1.2635	49.643	6	1	Leave out requantified	1.5935	0.56357	1.0202	NaN	1.4336	0.59139	1.4803	NaN
DYNLL2	Dynein light chain 2, cytoplasmic	NaN	0.58851	NaN	NaN	Q96FJ2	Q96FJ2	4	2	2	sp|Q96FJ2|DYL2_HUMAN Dynein light chain 2, cytoplasmic OS=Homo sapiens OX=9606 GN=DYNLL2 PE=1 SV=1	1	4	2	2	2	4	1	0	1	2	0	0	1	2	0	0	64	39.3	39.3	10.35	89	89	0	7.484	0.62281	0.58851	9.965	4	1	Median	NaN	0.62281	NaN	NaN	NaN	0.58851	NaN	NaN
C20orf27	UPF0687 protein C20orf27	0.97283	0.58778	NaN	NaN	Q9GZN8;Q9GZN8-2	Q9GZN8;Q9GZN8-2	1;1	1;1	1;1	sp|Q9GZN8|CT027_HUMAN UPF0687 protein C20orf27 OS=Homo sapiens OX=9606 GN=C20orf27 PE=1 SV=3;sp|Q9GZN8-2|CT027-2_HUMAN Isoform of Q9GZN8, Isoform 2 of UPF0687 protein C20orf27 OS=Homo sapiens OX=9606 GN=C20orf27 PE=1 SV=3	2	1	1	1	1	1	0	0	1	1	0	0	1	1	0	0	8	8	8	19.291	174	174;199	0.0019952	2.2892	0.87457	0.75618	35.628	2	1	Median	1.0039	0.76189	NaN	NaN	0.97283	0.58778	NaN	NaN
PM20D2	Peptidase M20 domain-containing protein 2	NaN	0.58653	NaN	NaN	Q8IYS1	Q8IYS1	2	2	2	sp|Q8IYS1|P20D2_HUMAN Peptidase M20 domain-containing protein 2 OS=Homo sapiens OX=9606 GN=PM20D2 PE=1 SV=2	1	2	2	2	1	2	0	0	1	2	0	0	1	2	0	0	6.7	6.7	6.7	47.776	436	436	0.00080515	2.3445	0.55892	0.58653	0.75811	2	0	Median	NaN	0.55892	NaN	NaN	NaN	0.58653	NaN	NaN
MT-ATP6	ATP synthase subunit a	1.8626	0.58552	NaN	NaN	P00846	P00846	1	1	1	sp|P00846|ATP6_HUMAN ATP synthase subunit a OS=Homo sapiens OX=9606 GN=MT-ATP6 PE=1 SV=1	1	1	1	1	1	1	0	0	1	1	0	0	1	1	0	0	4.4	4.4	4.4	24.817	226	226	0.0041353	1.8541	1.2197	1.0443	81.828	2	0	Median	1.9101	0.77883	NaN	NaN	1.8626	0.58552	NaN	NaN
NFYB	Nuclear transcription factor Y subunit beta	1.0443	0.58163	NaN	NaN	F8VSL3;P25208	F8VSL3;P25208	1;1	1;1	1;1	tr|F8VSL3|F8VSL3_HUMAN Isoform of P25208, Nuclear transcription factor Y subunit beta OS=Homo sapiens OX=9606 GN=NFYB PE=1 SV=2;sp|P25208|NFYB_HUMAN Nuclear transcription factor Y subunit beta OS=Homo sapiens OX=9606 GN=NFYB PE=1 SV=2	2	1	1	1	1	1	0	0	1	1	0	0	1	1	0	0	6.2	6.2	6.2	22.957	208	208;207	0.0037979	1.9213	0.81096	0.77937	41.386	2	0	Median	1.0749	0.61182	NaN	NaN	1.0443	0.58163	NaN	NaN
UCK2	Uridine-cytidine kinase 2	0.93904	0.58061	1.6874	NaN	A0A2R8Y653;Q9BZX2	A0A2R8Y653;Q9BZX2	3;3	3;3	3;3	tr|A0A2R8Y653|A0A2R8Y653_HUMAN Isoform of Q9BZX2, Uridine-cytidine kinase 2 OS=Homo sapiens OX=9606 GN=UCK2 PE=1 SV=1;sp|Q9BZX2|UCK2_HUMAN Uridine-cytidine kinase 2 OS=Homo sapiens OX=9606 GN=UCK2 PE=1 SV=1	2	3	3	3	2	3	1	1	2	3	1	1	2	3	1	1	16.2	16.2	16.2	27.408	240	240;261	0	10.457	0.78899	0.71966	24.085	5	0	Leave out requantified	0.94599	0.6271	0.951	NaN	0.93904	0.58061	1.6874	NaN
SP100;SP140L	Nuclear autoantigen Sp-100;Nuclear body protein SP140-like protein	1.2651	0.57953	NaN	NaN	P23497-4;P23497;P23497-7;P23497-6;P23497-2;P23497-5;E9PHV6;P23497-3;C9JBL0;H7C4B4;U5Y3L1;H7C1G8;H7BYP4;Q9H930-2;Q9H930-3;Q9H930-1;Q9H930	P23497-4;P23497;P23497-7;P23497-6;P23497-2;P23497-5;E9PHV6;P23497-3;C9JBL0;H7C4B4;U5Y3L1;H7C1G8;H7BYP4;Q9H930-2;Q9H930-3;Q9H930-1;Q9H930	2;2;2;2;2;2;2;2;1;1;1;1;1;1;1;1;1	2;2;2;2;2;2;2;2;1;1;1;1;1;1;1;1;1	2;2;2;2;2;2;2;2;1;1;1;1;1;1;1;1;1	sp|P23497-4|SP100-4_HUMAN Isoform of P23497, Isoform Sp100-C of Nuclear autoantigen Sp-100 OS=Homo sapiens OX=9606 GN=SP100 PE=1 SV=3;sp|P23497|SP100_HUMAN Nuclear autoantigen Sp-100 OS=Homo sapiens OX=9606 GN=SP100 PE=1 SV=3;sp|P23497-7|SP100-7_HUMAN Isof	17	2	2	2	1	2	0	0	1	2	0	0	1	2	0	0	4.2	4.2	4.2	101.57	885	885;879;445;452;480;472;455;688;192;193;555;126;520;545;129;438;580	0	4.9623	0.8901	0.85623	55.201	2	0	Median	1.3867	0.57135	NaN	NaN	1.2651	0.57953	NaN	NaN
GNAI3;GNAT2;GNAS;GNAO1;GNAI2;GNAL;GNAT3;GNAI1;GNAT1	Guanine nucleotide-binding protein G(k) subunit alpha;Guanine nucleotide-binding protein G(i) subunit alpha-2;Guanine nucleotide-binding protein G(s) subunit alpha isoforms XLas;Guanine nucleotide-binding protein G(olf) subunit alpha;Guanine nucleotide-binding protein G(s) subunit alpha isoforms short;Guanine nucleotide-binding protein G(t) subunit alpha-3;Guanine nucleotide-binding protein G(i) …	1.2029	0.57914	2.4949	NaN	P08754;A0A1W2PRE1;A0A087WZE5;A0A1W2PQK2;H0Y7F4;A0A3B3IUA8;A0A1W2PS82;Q5JWE9;A0A1W2PRJ7;H0Y7E8;Q5JWD1;A0A087WTB6;A2A2R6;P04899-4;Q5JWF2-2;P38405-2;P63092-4;P63092;P38405;P63092-2;P63092-3;A8MTJ3;P04899;P63096;P19087;P09471-2;P09471;P11488;Q5JWF2	P08754;A0A1W2PRE1;A0A087WZE5;A0A1W2PQK2;H0Y7F4;A0A3B3IUA8;A0A1W2PS82;Q5JWE9;A0A1W2PRJ7;H0Y7E8;Q5JWD1;A0A087WTB6;A2A2R6;P04899-4;Q5JWF2-2;P38405-2;P63092-4;P63092;P38405;P63092-2;P63092-3;A8MTJ3;P04899;P63096;P19087;P09471-2;P09471;P11488;Q5JWF2	2;1;1;1;1;1;1;1;1;1;1;1;1;1;1;1;1;1;1;1;1;1;1;1;1;1;1;1;1	2;1;1;1;1;1;1;1;1;1;1;1;1;1;1;1;1;1;1;1;1;1;1;1;1;1;1;1;1	2;1;1;1;1;1;1;1;1;1;1;1;1;1;1;1;1;1;1;1;1;1;1;1;1;1;1;1;1	sp|P08754|GNAI3_HUMAN Guanine nucleotide-binding protein G(k) subunit alpha OS=Homo sapiens OX=9606 GN=GNAI3 PE=1 SV=3;tr|A0A1W2PRE1|A0A1W2PRE1_HUMAN Isoform of P09471, Guanine nucleotide-binding protein G(o) subunit alpha OS=Homo sapiens OX=9606 GN=GNAO1	29	2	2	2	1	2	1	0	1	2	1	0	1	2	1	0	7.3	7.3	7.3	40.532	354	354;54;123;61;199;148;146;193;104;93;87;84;61;366;1023;458;395;394;381;380;379;354;355;354;354;354;354;350;1037	0.0016026	2.3152	0.90456	0.8424	69.937	4	1	Median	1.3143	0.58427	1.3096	NaN	1.2029	0.57914	2.4949	NaN
CHEK1	Serine/threonine-protein kinase Chk1	0.92687	0.57811	NaN	NaN	J3KN87;E7EPP6;O14757-2;O14757-3;O14757;E9PJI4;E9PPA5;E9PKQ3;A0A087WT52	J3KN87;E7EPP6;O14757-2;O14757-3;O14757;E9PJI4;E9PPA5;E9PKQ3	3;3;3;3;3;2;2;2;1	3;3;3;3;3;2;2;2;1	3;3;3;3;3;2;2;2;1	tr|J3KN87|J3KN87_HUMAN Isoform of O14757, Serine/threonine-protein kinase Chk1 OS=Homo sapiens OX=9606 GN=CHEK1 PE=1 SV=1;tr|E7EPP6|E7EPP6_HUMAN Isoform of O14757, Serine/threonine-protein kinase Chk1 OS=Homo sapiens OX=9606 GN=CHEK1 PE=1 SV=1;sp|O14757-2|	9	3	3	3	2	3	0	0	2	3	0	0	2	3	0	0	8.8	8.8	8.8	49.019	432	432;492;382;442;476;170;192;204;110	0	13.25	0.71262	0.7277	17.865	4	0	Leave out requantified	0.98376	0.54825	NaN	NaN	0.92687	0.57811	NaN	NaN
ITSN1;ITSN2	Intersectin-1;Intersectin-2	1.1309	0.57807	NaN	NaN	H0Y3G5;A0A087WVF7;Q15811-4;Q15811-9;Q9NZM3-2;Q9NZM3;Q15811-8;Q15811	H0Y3G5;A0A087WVF7;Q15811-4;Q15811-9;Q9NZM3-2;Q9NZM3;Q15811-8;Q15811	1;1;1;1;1;1;1;1	1;1;1;1;1;1;1;1	1;1;1;1;1;1;1;1	tr|H0Y3G5|H0Y3G5_HUMAN Isoform of Q15811, Intersectin-1 (Fragment) OS=Homo sapiens OX=9606 GN=ITSN1 PE=1 SV=1;tr|A0A087WVF7|A0A087WVF7_HUMAN Isoform of Q9NZM3, Intersectin-2 OS=Homo sapiens OX=9606 GN=ITSN2 PE=1 SV=1;sp|Q15811-4|ITSN1-4_HUMAN Isoform of Q1	8	1	1	1	1	1	0	0	1	1	0	0	1	1	0	0	3.5	3.5	3.5	36.247	317	317;1680;1650;1660;1670;1697;1716;1721	0.0073019	1.6197	0.81399	0.80853	47.451	2	0	Median	1.1993	0.55245	NaN	NaN	1.1309	0.57807	NaN	NaN
SNRNP27	U4/U6.U5 small nuclear ribonucleoprotein 27 kDa protein	NaN	0.57368	0.44998	NaN	Q8WVK2	Q8WVK2	1	1	1	sp|Q8WVK2|SNR27_HUMAN U4/U6.U5 small nuclear ribonucleoprotein 27 kDa protein OS=Homo sapiens OX=9606 GN=SNRNP27 PE=1 SV=1	1	1	1	1	0	1	1	0	0	1	1	0	0	1	1	0	10.3	10.3	10.3	18.86	155	155	0.0041338	1.8497	0.45294	0.50808	17.173	2	1	Median	NaN	0.54262	0.37808	NaN	NaN	0.57368	0.44998	NaN
RBPJ	Recombining binding protein suppressor of hairless	NaN	0.56273	NaN	NaN	D6R927;Q06330-3;Q06330-2;Q06330-5;Q06330-4;Q06330-6;Q06330-7;Q06330	D6R927;Q06330-3;Q06330-2;Q06330-5;Q06330-4;Q06330-6;Q06330-7;Q06330	1;1;1;1;1;1;1;1	1;1;1;1;1;1;1;1	1;1;1;1;1;1;1;1	tr|D6R927|D6R927_HUMAN Isoform of Q06330, Recombining-binding protein suppressor of hairless OS=Homo sapiens OX=9606 GN=RBPJ PE=1 SV=1;sp|Q06330-3|SUH-3_HUMAN Isoform of Q06330, Isoform APCR-3 of Recombining binding protein suppressor of hairless OS=Homo s	8	1	1	1	0	1	0	0	0	1	0	0	0	1	0	0	2.9	2.9	2.9	43.496	382	382;411;425;465;485;486;487;500	0.0008071	2.3652	0.53895	0.56273	NaN	1	0	Median	NaN	0.53895	NaN	NaN	NaN	0.56273	NaN	NaN
SLC25A22;SLC25A18	Mitochondrial glutamate carrier 1;Mitochondrial glutamate carrier 2	1.5933	0.56077	1.0952	NaN	E9PJH7;Q9H936;A0A0D9SEI9;A0A0D9SFE1;Q9H1K4;A0A0D9SFA8;K4DIB0;K4DIA2;A0A0D9SG84;E9PI74;E9PQ36;K4DIB6;K4DIB3;K4DIB8;K4DIA8;E9PS95	E9PJH7;Q9H936;A0A0D9SEI9;A0A0D9SFE1;Q9H1K4;A0A0D9SFA8;K4DIB0;K4DIA2;A0A0D9SG84;E9PI74;E9PQ36;K4DIB6;K4DIB3;K4DIB8;K4DIA8;E9PS95	4;4;3;3;3;2;2;2;2;2;2;2;2;2;2;2	4;4;3;3;3;2;2;2;2;2;2;2;2;2;2;2	4;4;3;3;3;2;2;2;2;2;2;2;2;2;2;2	tr|E9PJH7|E9PJH7_HUMAN Isoform of Q9H936, Mitochondrial glutamate carrier 1 (Fragment) OS=Homo sapiens OX=9606 GN=SLC25A22 PE=1 SV=5;sp|Q9H936|GHC1_HUMAN Mitochondrial glutamate carrier 1 OS=Homo sapiens OX=9606 GN=SLC25A22 PE=1 SV=1;tr|A0A0D9SEI9|A0A0D9SE	16	4	4	4	1	3	2	0	1	3	2	0	1	3	2	0	14.1	14.1	14.1	33.281	313	313;323;197;247;315;97;103;114;117;127;134;156;161;177;190;196	0	12.363	0.72783	0.8761	54.426	5	1	Leave out requantified	1.6625	0.69392	0.65211	NaN	1.5933	0.56077	1.0952	NaN
DCK	Deoxycytidine kinase	NaN	0.55561	NaN	NaN	D6RCP9;D6RFG8;P27707	D6RCP9;D6RFG8;P27707	1;1;1	1;1;1	1;1;1	tr|D6RCP9|D6RCP9_HUMAN Isoform of P27707, Deoxycytidine kinase OS=Homo sapiens OX=9606 GN=DCK PE=1 SV=1;tr|D6RFG8|D6RFG8_HUMAN Isoform of P27707, Deoxycytidine kinase OS=Homo sapiens OX=9606 GN=DCK PE=1 SV=1;sp|P27707|DCK_HUMAN Deoxycytidine kinase OS=Homo	3	1	1	1	0	1	0	0	0	1	0	0	0	1	0	0	5.5	5.5	5.5	22.891	199	199;317;260	0.0083032	1.5567	0.61198	0.55561	NaN	1	0	Median	NaN	0.61198	NaN	NaN	NaN	0.55561	NaN	NaN
HELLS	Lymphoid-specific helicase	1.0939	0.5527	0.94782	NaN	A0A0B4J1V9;Q9NRZ9-6;Q9NRZ9-5;Q9NRZ9-3;Q9NRZ9-2;Q9NRZ9;A0A087WSW7;F6XU50;Q9NRZ9-4;Q9NW36;B1ALG6;Q9NRZ9-9;Q9NRZ9-8;Q9NRZ9-7	A0A0B4J1V9;Q9NRZ9-6;Q9NRZ9-5;Q9NRZ9-3;Q9NRZ9-2;Q9NRZ9;A0A087WSW7;F6XU50;Q9NRZ9-4;Q9NW36	4;4;4;4;4;4;3;3;3;2;1;1;1;1	4;4;4;4;4;4;3;3;3;2;1;1;1;1	4;4;4;4;4;4;3;3;3;2;1;1;1;1	tr|A0A0B4J1V9|A0A0B4J1V9_HUMAN Isoform of Q9NRZ9, Helicase, lymphoid-specific, isoform CRA_b OS=Homo sapiens OX=9606 GN=HELLS PE=1 SV=1;sp|Q9NRZ9-6|HELLS-6_HUMAN Isoform of Q9NRZ9, Isoform 6 of Lymphoid-specific helicase OS=Homo sapiens OX=9606 GN=HELLS PE	14	4	4	4	3	1	4	0	3	1	4	0	3	1	4	0	4.9	4.9	4.9	102.71	884	884;708;740;806;822;838;700;714;782;310;192;129;315;345	0	6.4264	0.69878	0.94782	18.04	7	0	Leave out requantified	1.1229	0.52226	0.64111	NaN	1.0939	0.5527	0.94782	NaN
LIN7C	Protein lin-7 homolog C	0.94606	0.55082	1.1999	NaN	Q9NUP9;G3V1D4;H0YI92;H0YIA8;O14910	Q9NUP9;G3V1D4	3;2;1;1;1	3;2;1;1;1	3;2;1;1;1	sp|Q9NUP9|LIN7C_HUMAN Protein lin-7 homolog C OS=Homo sapiens OX=9606 GN=LIN7C PE=1 SV=1;tr|G3V1D4|G3V1D4_HUMAN Isoform of Q9NUP9, Lin-7 homolog C (C. elegans), isoform CRA_b OS=Homo sapiens OX=9606 GN=LIN7C PE=1 SV=1	5	3	3	3	2	2	2	0	2	2	2	0	2	2	2	0	20.3	20.3	20.3	21.834	197	197;173;130;180;233	0	6.9971	0.75069	0.78079	27.153	4	0	Leave out requantified	0.94589	0.69587	0.69425	NaN	0.94606	0.55082	1.1999	NaN
ERP29	Endoplasmic reticulum resident protein 29	0.95127	0.55019	1.262	NaN	P30040;F8VY02;P30040-2	P30040;F8VY02	4;3;1	4;3;1	4;3;1	sp|P30040|ERP29_HUMAN Endoplasmic reticulum resident protein 29 OS=Homo sapiens OX=9606 GN=ERP29 PE=1 SV=4;tr|F8VY02|F8VY02_HUMAN Isoform of P30040, Endoplasmic reticulum resident protein 29 OS=Homo sapiens OX=9606 GN=ERP29 PE=1 SV=1	3	4	4	4	3	2	4	0	3	2	4	0	3	2	4	0	18	18	18	28.993	261	261;160;53	0	5.6679	0.77288	0.9785	10.352	9	0	Leave out requantified	0.95635	0.6577	0.71559	NaN	0.95127	0.55019	1.262	NaN
CHCHD3	MICOS complex subunit MIC19	NaN	0.54625	NaN	NaN	A0A286YEX5;C9JRZ6;F8WAR4;Q9NX63	A0A286YEX5;C9JRZ6;F8WAR4;Q9NX63	2;2;2;2	2;2;2;2	2;2;2;2	tr|A0A286YEX5|A0A286YEX5_HUMAN Isoform of Q9NX63, MICOS complex subunit (Fragment) OS=Homo sapiens OX=9606 GN=CHCHD3 PE=1 SV=1;tr|C9JRZ6|C9JRZ6_HUMAN Isoform of Q9NX63, MICOS complex subunit OS=Homo sapiens OX=9606 GN=CHCHD3 PE=1 SV=2;tr|F8WAR4|F8WAR4_HUMA	4	2	2	2	1	1	0	0	1	1	0	0	1	1	0	0	25.7	25.7	25.7	11.279	101	101;232;241;227	0.0086022	1.5057	0.64854	0.54625	NaN	1	0	Median	NaN	0.64854	NaN	NaN	NaN	0.54625	NaN	NaN
ACSF3	Acyl-CoA synthetase family member 3, mitochondrial	1.0222	0.54543	0.97156	NaN	F5H362;F5H755;F5H5A1;Q4G176;H0YGC7;A0A3B3ISK9	F5H362;F5H755;F5H5A1;Q4G176;H0YGC7;A0A3B3ISK9	2;2;2;2;1;1	2;2;2;2;1;1	2;2;2;2;1;1	tr|F5H362|F5H362_HUMAN Isoform of Q4G176, Acyl-CoA synthetase family member 3, mitochondrial (Fragment) OS=Homo sapiens OX=9606 GN=ACSF3 PE=1 SV=1;tr|F5H755|F5H755_HUMAN Isoform of Q4G176, Acyl-CoA synthetase family member 3, mitochondrial (Fragment) OS=Ho	6	2	2	2	1	2	1	0	1	2	1	0	1	2	1	0	13.2	13.2	13.2	21.539	190	190;235;311;576;183;646	0.0019912	2.2717	0.57988	0.7028	45.795	4	0	Leave out requantified	1.1069	0.50754	0.68735	NaN	1.0222	0.54543	0.97156	NaN
GSTZ1	Maleylacetoacetate isomerase	1.7183	0.54046	1.5251	NaN	A0A0A0MR33;G3V267;G3V5T0;A0A0C4DFM0;G3V4T6;O43708-3;O43708;G3V3B9;O43708-2	A0A0A0MR33;G3V267;G3V5T0;A0A0C4DFM0;G3V4T6;O43708-3;O43708	3;3;3;3;2;2;2;1;1	3;3;3;3;2;2;2;1;1	3;3;3;3;2;2;2;1;1	tr|A0A0A0MR33|A0A0A0MR33_HUMAN Isoform of O43708, Maleylacetoacetate isomerase OS=Homo sapiens OX=9606 GN=GSTZ1 PE=1 SV=1;tr|G3V267|G3V267_HUMAN Isoform of O43708, Maleylacetoacetate isomerase OS=Homo sapiens OX=9606 GN=GSTZ1 PE=1 SV=1;tr|G3V5T0|G3V5T0_HUM	9	3	3	3	2	2	2	1	2	2	2	1	2	2	2	1	23	23	23	19.373	174	174;189;202;216;217;174;216;119;161	0	10.082	1.0396	1.0938	28.532	6	1	Leave out requantified	1.7555	0.67065	0.99082	NaN	1.7183	0.54046	1.5251	NaN
[truncated: 2,217 more rows]
[truncated: 49 more columns]
