# Supplementary material for: The small CRL4CSA ubiquitin ligase component DDA1 regulates transcription-coupled repair dynamics
Source: Nat Commun. 2024 Jul 29;15:6374. doi: 10.1038/s41467-024-50584-7 (PMC11286758; doi:10.1038/s41467-024-50584-7)
Supplement: Supplementary file 5 — Supplementary Data 2 [file 41467_2024_50584_MOESM5_ESM.xlsx]

## Sheet: Sheet1
Gene names	Protein names	Ratio H/L normalized GFP-DDB2 (H) vs WT (L)	Protein IDs	Majority protein IDs	Peptide counts (all)	Peptide counts (razor+unique)	Peptide counts (unique)	Fasta headers	Number of proteins	Peptides	Razor + unique peptides	Unique peptides	Sequence coverage [%]	Unique + razor sequence coverage [%]	Unique sequence coverage [%]	Mol. weight [kDa]	Sequence length	Sequence lengths	Q-value	Score	Ratio H/L	Ratio H/L normalized	Ratio H/L variability [%]	Ratio H/L count	Ratio H/L iso-count	Ratio H/L type	Intensity	Intensity L	Intensity H	Peptide sequences	Only identified by site	Reverse	Potential contaminant	id	Peptide IDs	Peptide is razor	Mod. peptide IDs	Evidence IDs	MS/MS IDs	Best MS/MS	Oxidation (M) site IDs	Oxidation (M) site positions	Taxonomy IDs
NOSIP	Nitric oxide synthase-interacting protein	NaN	M0R1T7;M0QX85;M0R1K2;M0R3B2;A0A075B6F9;Q9Y314	M0R1T7;M0QX85;M0R1K2;M0R3B2;A0A075B6F9;Q9Y314	1;1;1;1;1;1	1;1;1;1;1;1	1;1;1;1;1;1	tr|M0R1T7|M0R1T7_HUMAN Isoform of Q9Y314, Nitric oxide synthase-interacting protein OS=Homo sapiens OX=9606 GN=NOSIP PE=1 SV=1;tr|M0QX85|M0QX85_HUMAN Isoform of Q9Y314, Nitric oxide synthase-interacting protein (Fragment) OS=Homo sapiens OX=9606 GN=NOSIP P	6	1	1	1	20.6	20.6	20.6	7.0019	63	63;96;176;241;304;301	0.0014327	7.5936	NaN	NaN	NaN	1	0	Median	262820	151610	111210	DTAASGYGTQNIR				7	1444	TRUE	1546	2192	3326;3327;3328	3328			9606;9606;9606;9606;9606;9606
NCAM1	Neural cell adhesion molecule 1	NaN	H7BYX6;A0A087WTE4;A0A087WTF6;A0A087WX77;A0A087WWD4;A0A087WV75;P13591-6;P13591-5;P13591-4;P13591-3;P13591-1;P13591	H7BYX6;A0A087WTE4;A0A087WTF6;A0A087WX77;A0A087WWD4;A0A087WV75;P13591-6;P13591-5;P13591-4;P13591-3;P13591-1;P13591	1;1;1;1;1;1;1;1;1;1;1;1	1;1;1;1;1;1;1;1;1;1;1;1	1;1;1;1;1;1;1;1;1;1;1;1	tr|H7BYX6|H7BYX6_HUMAN Isoform of P13591, Neural cell adhesion molecule 1 OS=Homo sapiens OX=9606 GN=NCAM1 PE=1 SV=2;tr|A0A087WTE4|A0A087WTE4_HUMAN Isoform of P13591, Neural cell adhesion molecule 1 OS=Homo sapiens OX=9606 GN=NCAM1 PE=1 SV=1;tr|A0A087WTF6|	12	1	1	1	2.1	2.1	2.1	80.282	725	725;761;848;858;884;884;364;665;726;761;848;858	0.0020534	6.9954	NaN	NaN	NaN	0	0	Median	0	0	0	GIKKTDEGTYRCEGR				11	3051	TRUE	3243	4599	7058	7058			9606;9606;9606;9606;9606;9606;9606;9606;9606;9606;9606;9606
CENPF	Centromere protein F	NaN	A0A087WTY4;P49454	A0A087WTY4;P49454	1;1	1;1	1;1	tr|A0A087WTY4|A0A087WTY4_HUMAN Isoform of P49454, Centromere protein F OS=Homo sapiens OX=9606 GN=CENPF PE=1 SV=1;sp|P49454|CENPF_HUMAN Centromere protein F OS=Homo sapiens OX=9606 GN=CENPF PE=1 SV=3	2	1	1	1	6.9	6.9	6.9	20.44	175	175;3114	0.0044643	6.4469	NaN	NaN	NaN	0	0	Median	0	0	0	TAELQEELSGEK				14	7697	TRUE	8282	11844	18012	18012			9606;9606
NSMCE2	E3 SUMO-protein ligase NSE2	NaN	E5RIM1;A0A087WTZ8;E5RFJ1;E5RHW9;Q96MF7	E5RIM1;A0A087WTZ8;E5RFJ1;E5RHW9;Q96MF7	1;1;1;1;1	1;1;1;1;1	1;1;1;1;1	tr|E5RIM1|E5RIM1_HUMAN Isoform of Q96MF7, E3 SUMO-protein ligase NSE2 (Fragment) OS=Homo sapiens OX=9606 GN=NSMCE2 PE=1 SV=1;tr|A0A087WTZ8|A0A087WTZ8_HUMAN Isoform of Q96MF7, E3 SUMO-protein ligase NSE2 OS=Homo sapiens OX=9606 GN=NSMCE2 PE=1 SV=1;tr|E5RFJ1	5	1	1	1	7.9	7.9	7.9	15.485	139	139;157;187;193;247	0.0044671	6.4472	NaN	NaN	NaN	1	0	Median	193830	94288	99543	NSDADFQNNEK				15	6337	TRUE	6835	9773	14879;14880	14879			9606;9606;9606;9606;9606
MRPL45	39S ribosomal protein L45, mitochondrial	NaN	A0A0G2JMS5;A0A087WU62;A0A087X2D5;Q9BRJ2	A0A0G2JMS5;A0A087WU62;A0A087X2D5;Q9BRJ2	1;1;1;1	1;1;1;1	1;1;1;1	tr|A0A0G2JMS5|A0A0G2JMS5_HUMAN Isoform of Q9BRJ2, 39S ribosomal protein L45, mitochondrial OS=Homo sapiens OX=9606 GN=MRPL45 PE=1 SV=1;tr|A0A087WU62|A0A087WU62_HUMAN Isoform of Q9BRJ2, 39S ribosomal protein L45, mitochondrial OS=Homo sapiens OX=9606 GN=MRP	4	1	1	1	3.9	3.9	3.9	29.408	256	256;256;306;306	0.0014316	7.5831	NaN	NaN	NaN	1	1	Median	154410	112950	41461	DVLEYVVFEK				16	1488	TRUE	1591	2255	3417	3417			9606;9606;9606;9606
MKL1;mkl1	MKL/myocardin-like protein 1	NaN	E7ER32;A0A087X287;A0A087WVL2;A0A087WU73;A0A494BZX7;W0Z7M9;B0QY83;Q969V6	E7ER32;A0A087X287;A0A087WVL2;A0A087WU73;A0A494BZX7;W0Z7M9;B0QY83;Q969V6	1;1;1;1;1;1;1;1	1;1;1;1;1;1;1;1	1;1;1;1;1;1;1;1	tr|E7ER32|E7ER32_HUMAN Isoform of Q969V6, Myocardin-related transcription factor A OS=Homo sapiens OX=9606 GN=MRTFA PE=1 SV=2;tr|A0A087X287|A0A087X287_HUMAN Isoform of Q969V6, Myocardin-related transcription factor A OS=Homo sapiens OX=9606 GN=MRTFA PE=1 S	8	1	1	1	0.9	0.9	0.9	85.075	798	798;799;881;882;898;966;981;931	1	-2	NaN	NaN	NaN	1	0	Median	283720	156750	126970	DQMLQEK	+			17	1390	TRUE	1491	2120	3213	3213	12	526	9606;9606;9606;9606;9606;9606;9606;9606
DDX50	ATP-dependent RNA helicase DDX50	NaN	A0A087WVC1;Q9BQ39	A0A087WVC1;Q9BQ39	3;3	1;1	1;1	tr|A0A087WVC1|A0A087WVC1_HUMAN Isoform of Q9BQ39, ATP-dependent RNA helicase DDX50 OS=Homo sapiens OX=9606 GN=DDX50 PE=1 SV=1;sp|Q9BQ39|DDX50_HUMAN ATP-dependent RNA helicase DDX50 OS=Homo sapiens OX=9606 GN=DDX50 PE=1 SV=1	2	3	1	1	5.2	1.5	1.5	82.226	730	730;737	0.0033091	6.6713	NaN	NaN	NaN	1	0	Median	264640	150030	114610	EGAFSNFPISEETIK;GVTYLFPIQVK;NGIDILVGTPGR				23	1812;3383;6111	False;True;False	1937;3588;6584	2772;2773;5096;9354;9355	4228;4229;4230;4231;4232;7825;7826;14217;14218	4232;7826;14218			9606;9606
ACP6	Lysophosphatidic acid phosphatase type 6	NaN	A0A087WW36;Q9NPH0-2;Q9NPH0	A0A087WW36;Q9NPH0-2;Q9NPH0	1;1;1	1;1;1	1;1;1	tr|A0A087WW36|A0A087WW36_HUMAN Isoform of Q9NPH0, Lysophosphatidic acid phosphatase type 6 (Fragment) OS=Homo sapiens OX=9606 GN=ACP6 PE=1 SV=1;sp|Q9NPH0-2|PPA6-2_HUMAN Isoform of Q9NPH0, Isoform 2 of Lysophosphatidic acid phosphatase type 6 OS=Homo sapien	3	1	1	1	10.5	10.5	10.5	16.314	143	143;271;428	0.0014652	8.745	NaN	NaN	NaN	1	0	Median	696010	523700	172310	PYSPYDSQYHETTLK				29	6550	TRUE	7065	10096	15406	15406			9606;9606;9606
KIF1A;KIF1Bbeta;KIF1B;KIF1C	Kinesin-like protein;Kinesin-like protein KIF1C;Kinesin-like protein KIF1B;Kinesin-like protein KIF1A	NaN	H7C0K6;A0A3B3IU40;Q4R9M9;A0A087WWA3;A0A3B3ITW6;A0A3B3ITF7;A0A3B3IT28;A0A3B3ITE5;A0A3B3IUA1;A0A3F2YNW9;F8W8V9;O43896;O60333-2;Q12756;Q12756-3;Q12756-2;O60333-3;O60333;O60333-4	H7C0K6;A0A3B3IU40;Q4R9M9;A0A087WWA3;A0A3B3ITW6;A0A3B3ITF7;A0A3B3IT28;A0A3B3ITE5;A0A3B3IUA1;A0A3F2YNW9;F8W8V9;O43896;O60333-2;Q12756;Q12756-3;Q12756-2;O60333-3;O60333;O60333-4	1;1;1;1;1;1;1;1;1;1;1;1;1;1;1;1;1;1;1	1;1;1;1;1;1;1;1;1;1;1;1;1;1;1;1;1;1;1	1;1;1;1;1;1;1;1;1;1;1;1;1;1;1;1;1;1;1	tr|H7C0K6|H7C0K6_HUMAN Isoform of Q12756, Kinesin-like protein (Fragment) OS=Homo sapiens OX=9606 GN=KIF1A PE=1 SV=2;tr|A0A3B3IU40|A0A3B3IU40_HUMAN Isoform of Q12756, Kinesin-like protein KIF1A OS=Homo sapiens OX=9606 GN=KIF1A PE=1 SV=1;tr|Q4R9M9|Q4R9M9_HU	19	1	1	1	2.9	2.9	2.9	49.318	445	445;1699;1809;1797;1782;1728;1708;1724;1699;1698;1469;1103;1770;1690;1791;1799;1153;1816;1823	1	-2	NaN	NaN	NaN	1	0	Median	139490	72979	66510	TVAATNMNETSSR	+			31	8243	TRUE	8859	12700	19314	19314	32	210	9606;9606;9606;9606;9606;9606;9606;9606;9606;9606;9606;9606;9606;9606;9606;9606;9606;9606;9606
SLC4A1AP	Kanadaptin	NaN	A0A087WWF4;A0A087X0M4;Q9BWU0;H7C256	A0A087WWF4;A0A087X0M4;Q9BWU0;H7C256	2;2;2;1	2;2;2;1	2;2;2;1	tr|A0A087WWF4|A0A087WWF4_HUMAN Isoform of Q9BWU0, Kanadaptin (Fragment) OS=Homo sapiens OX=9606 GN=SLC4A1AP PE=1 SV=1;tr|A0A087X0M4|A0A087X0M4_HUMAN Isoform of Q9BWU0, Kanadaptin OS=Homo sapiens OX=9606 GN=SLC4A1AP PE=1 SV=1;sp|Q9BWU0|NADAP_HUMAN Kanadapti	4	2	2	2	7.7	7.7	7.7	30.978	273	273;742;796;157	0	12.761	NaN	NaN	NaN	1	0	Median	773040	321620	451420	EAESELTVTQLK;ILDTLGLLR				32	1575;3919	True;True	1682;4148	2388;5929	3630;9103	3630;9103			9606;9606;9606;9606
DDX52	Probable ATP-dependent RNA helicase DDX52	NaN	A0A087X121;Q9Y2R4	A0A087X121;Q9Y2R4	1;1	1;1	1;1	tr|A0A087X121|A0A087X121_HUMAN Isoform of Q9Y2R4, Probable ATP-dependent RNA helicase DDX52 (Fragment) OS=Homo sapiens OX=9606 GN=DDX52 PE=1 SV=1;sp|Q9Y2R4|DDX52_HUMAN Probable ATP-dependent RNA helicase DDX52 OS=Homo sapiens OX=9606 GN=DDX52 PE=1 SV=3	2	1	1	1	12.2	12.2	12.2	12.887	115	115;599	0	13.629	NaN	NaN	NaN	1	0	Median	342800	144280	198520	AITFFTEDDKPLLR				48	430	TRUE	451	624	941;942	942			9606;9606
TAX1BP3		NaN	A0A087X282	A0A087X282	1	1	1	tr|A0A087X282|A0A087X282_HUMAN Isoform of O14907, Tax1-binding protein 3 OS=Homo sapiens OX=9606 GN=TAX1BP3 PE=1 SV=1	1	1	1	1	16.3	16.3	16.3	11.049	98	98	1	-2	NaN	NaN	NaN	0	0	Median	0	0	0	VNGWDMTMVTHDQARK	+			53	8894	TRUE	9553	13720	20944	20944	44	59	9606
EFCAB8		NaN	A0A096LNH2	A0A096LNH2	1	1	1	tr|A0A096LNH2|A0A096LNH2_HUMAN Isoform of A8MWE9, EF-hand calcium-binding domain-containing protein 8 OS=Homo sapiens OX=9606 GN=EFCAB8 PE=1 SV=1	1	1	1	1	1	1	1	145.87	1288	1288	1	-2	NaN	NaN	NaN	0	0	Median	0	0	0	REQAALMALLHGK	+			58	6854	TRUE	7382	10545	16047	16047	46	1050	9606
C21orf33		NaN	A0A096LNH5;H7C1F6;H7C2G3;P0DPI2-2;A0A0B4J2H4;A0A0B4J2D5-2;P0DPI2;A0A0B4J2D5;A0A096LPI6	A0A096LNH5;H7C1F6;H7C2G3;P0DPI2-2;A0A0B4J2H4;A0A0B4J2D5-2;P0DPI2;A0A0B4J2D5;A0A096LPI6	1;1;1;1;1;1;1;1;1	1;1;1;1;1;1;1;1;1	1;1;1;1;1;1;1;1;1	tr|A0A096LNH5|A0A096LNH5_HUMAN Isoform of A0A0B4J2D5, Glutamine amidotransferase-like class 1 domain-containing protein 3B, mitochondrial OS=Homo sapiens OX=9606 GN=GATD3B PE=1 SV=1;tr|H7C1F6|H7C1F6_HUMAN Isoform of P0DPI2, Glutamine amidotransferase-like	9	1	1	1	5.5	5.5	5.5	19.416	182	182;184;191;237;237;237;268;268;279	0.0085314	6.1746	NaN	NaN	NaN	1	1	Median	495600	206490	289110	EVVEAHVDQK				59	2403	TRUE	2558	3651	5607	5607			9606;9606;9606;9606;9606;9606;9606;9606;9606
PYCRL	Pyrroline-5-carboxylate reductase;Pyrroline-5-carboxylate reductase 3	NaN	B5MD87;A0A0A0MQS1;Q53H96-2;Q53H96	B5MD87;A0A0A0MQS1;Q53H96-2;Q53H96	1;1;1;1	1;1;1;1	1;1;1;1	tr|B5MD87|B5MD87_HUMAN Isoform of Q53H96, Pyrroline-5-carboxylate reductase 3 OS=Homo sapiens OX=9606 GN=PYCR3 PE=1 SV=2;tr|A0A0A0MQS1|A0A0A0MQS1_HUMAN Isoform of Q53H96, Pyrroline-5-carboxylate reductase OS=Homo sapiens OX=9606 GN=PYCR3 PE=1 SV=1;sp|Q53H9	4	1	1	1	8	8	8	14.341	137	137;286;254;274	0.0032873	6.6473	NaN	NaN	NaN	1	0	Median	402440	272570	129860	IAAQTLLGTAK				60	3597	TRUE	3810	5428	8331	8331			9606;9606;9606;9606
		NaN	A0A0A0MQY5	A0A0A0MQY5	1	1	1	tr|A0A0A0MQY5|A0A0A0MQY5_HUMAN Uncharacterized protein OS=Homo sapiens OX=9606 PE=4 SV=1	1	1	1	1	21.3	21.3	21.3	6.149	61	61	1	-2	NaN	NaN	NaN	1	1	Median	1314300	342330	971940	MAGDGVSLLMPSR	+			62	5716	TRUE	6061	8627	13130	13130	47;48	1;10	9606
CTDP1	RNA polymerase II subunit A C-terminal domain phosphatase	NaN	A0A0A0MR03;Q9Y5B0	A0A0A0MR03;Q9Y5B0	1;1	1;1	1;1	tr|A0A0A0MR03|A0A0A0MR03_HUMAN Isoform of Q9Y5B0, RNA polymerase II subunit A C-terminal domain phosphatase OS=Homo sapiens OX=9606 GN=CTDP1 PE=1 SV=1;sp|Q9Y5B0|CTDP1_HUMAN RNA polymerase II subunit A C-terminal domain phosphatase OS=Homo sapiens OX=9606 G	2	1	1	1	1.9	1.9	1.9	92.376	842	842;961	0.00447	6.4472	NaN	NaN	NaN	0	0	Median	0	0	0	TLGAPASSERSAAGGR				64	7998	TRUE	8598	12304	18733	18733			9606;9606
HNRNPUL1	Heterogeneous nuclear ribonucleoprotein U-like protein 1	NaN	M0R3F1;A0A0A0MRA5;B7Z4B8;Q9BUJ2-4;Q9BUJ2-2;Q9BUJ2;M0QYM5;M0QYI8;M0QYZ0;Q9BUJ2-3	M0R3F1;A0A0A0MRA5;B7Z4B8;Q9BUJ2-4;Q9BUJ2-2;Q9BUJ2;M0QYM5;M0QYI8;M0QYZ0;Q9BUJ2-3	2;2;2;2;2;2;1;1;1;1	2;2;2;2;2;2;1;1;1;1	2;2;2;2;2;2;1;1;1;1	tr|M0R3F1|M0R3F1_HUMAN Isoform of Q9BUJ2, Heterogeneous nuclear ribonucleoprotein U-like protein 1 (Fragment) OS=Homo sapiens OX=9606 GN=HNRNPUL1 PE=1 SV=1;tr|A0A0A0MRA5|A0A0A0MRA5_HUMAN Isoform of Q9BUJ2, Heterogeneous nuclear ribonucleoprotein U-like pro	10	2	2	2	3.6	3.6	3.6	71.611	641	641;766;767;756;804;856;90;172;371;752	0	13.196	NaN	NaN	NaN	1	0	Median	719100	448260	270840	INEEISVK;NYILDQTNVYGSAQR				65	4021;6432	True;True	4269;6940	6098;9919	9394;15110	9394;15110			9606;9606;9606;9606;9606;9606;9606;9606;9606;9606
COG4	Conserved oligomeric Golgi complex subunit 4	NaN	H3BQB2;A0A0A0MS45;J3KNI1;Q9H9E3-3;Q9H9E3	H3BQB2;A0A0A0MS45;J3KNI1;Q9H9E3-3;Q9H9E3	1;1;1;1;1	1;1;1;1;1	1;1;1;1;1	tr|H3BQB2|H3BQB2_HUMAN Isoform of Q9H9E3, Conserved oligomeric Golgi complex subunit 4 (Fragment) OS=Homo sapiens OX=9606 GN=COG4 PE=1 SV=2;tr|A0A0A0MS45|A0A0A0MS45_HUMAN Isoform of Q9H9E3, Conserved oligomeric Golgi complex subunit 4 OS=Homo sapiens OX=96	5	1	1	1	8.4	8.4	8.4	16.379	143	143;768;789;712;785	1	-2	NaN	NaN	NaN	1	0	Median	1669500	843790	825670	LSQMATILNLER	+			74	5470	TRUE	5801	8266	12589	12589	54	91	9606;9606;9606;9606;9606
MYD88	Myeloid differentiation primary response protein MyD88	NaN	A0A0A0MSI9;A0A0A0MS70;H0Y4G9;Q99836-2;Q99836-5;Q99836;Q99836-6	A0A0A0MSI9;A0A0A0MS70;H0Y4G9;Q99836-2;Q99836-5;Q99836;Q99836-6	1;1;1;1;1;1;1	1;1;1;1;1;1;1	1;1;1;1;1;1;1	tr|A0A0A0MSI9|A0A0A0MSI9_HUMAN Isoform of Q99836, Myeloid differentiation primary response protein MyD88 OS=Homo sapiens OX=9606 GN=MYD88 PE=1 SV=1;tr|A0A0A0MS70|A0A0A0MS70_HUMAN Isoform of Q99836, Myeloid differentiation primary response protein MyD88 OS=	7	1	1	1	4.5	4.5	4.5	29.626	264	264;309;317;251;275;296;304	0.002052	6.985	NaN	NaN	NaN	1	0	Median	229210	135500	93706	FALSLSPGAHQK				76	2448	TRUE	2604	3713	5698	5698			9606;9606;9606;9606;9606;9606;9606
ADD1	Alpha-adducin	NaN	A0A0A0MSR2;H0Y9H2;E7EV99;E7ENY0;P35611-5;P35611-2;P35611-6;P35611-4;P35611;P35611-3	A0A0A0MSR2;H0Y9H2;E7EV99;E7ENY0;P35611-5;P35611-2;P35611-6;P35611-4;P35611;P35611-3	1;1;1;1;1;1;1;1;1;1	1;1;1;1;1;1;1;1;1;1	1;1;1;1;1;1;1;1;1;1	tr|A0A0A0MSR2|A0A0A0MSR2_HUMAN Isoform of P35611, Alpha-adducin OS=Homo sapiens OX=9606 GN=ADD1 PE=1 SV=1;tr|H0Y9H2|H0Y9H2_HUMAN Isoform of P35611, Alpha-adducin (Fragment) OS=Homo sapiens OX=9606 GN=ADD1 PE=1 SV=1;tr|E7EV99|E7EV99_HUMAN Isoform of P35611,	10	1	1	1	4.5	4.5	4.5	43.99	400	400;444;632;663;511;631;662;662;737;768	0.0020188	6.7871	NaN	NaN	NaN	1	0	Median	184390	96880	87508	TLASAGGPDNLVLLNPEK				79	7980	TRUE	8580	12286	18711	18711			9606;9606;9606;9606;9606;9606;9606;9606;9606;9606
NUP214	Nuclear pore complex protein Nup214	NaN	A0A0A0MSW3;A0A494C1F2;P35658-2;P35658-4;P35658;P35658-3;P35658-5	A0A0A0MSW3;A0A494C1F2;P35658-2;P35658-4;P35658;P35658-3;P35658-5	1;1;1;1;1;1;1	1;1;1;1;1;1;1	1;1;1;1;1;1;1	tr|A0A0A0MSW3|A0A0A0MSW3_HUMAN Isoform of P35658, Nuclear pore complex protein Nup214 OS=Homo sapiens OX=9606 GN=NUP214 PE=1 SV=1;tr|A0A494C1F2|A0A494C1F2_HUMAN Isoform of P35658, Nuclear pore complex protein Nup214 OS=Homo sapiens OX=9606 GN=NUP214 PE=4 S	7	1	1	1	0.7	0.7	0.7	152.57	1519	1519;2078;2079;2080;2090;2091;2093	0.0044586	6.4409	NaN	NaN	NaN	1	0	Median	227270	154600	72665	ETLFNTLANNR				80	2307	TRUE	2451	3490	5366	5366			9606;9606;9606;9606;9606;9606;9606
WDR36	WD repeat-containing protein 36	NaN	A0A0A0MTB8;Q8NI36	A0A0A0MTB8;Q8NI36	1;1	1;1	1;1	tr|A0A0A0MTB8|A0A0A0MTB8_HUMAN Isoform of Q8NI36, WD repeat-containing protein 36 OS=Homo sapiens OX=9606 GN=WDR36 PE=1 SV=1;sp|Q8NI36|WDR36_HUMAN WD repeat-containing protein 36 OS=Homo sapiens OX=9606 GN=WDR36 PE=1 SV=1	2	1	1	1	1.3	1.3	1.3	99.365	895	895;951	0.0091241	6.1451	NaN	NaN	NaN	1	0	Median	197800	113790	84004	IWIFDGPTGEGR				83	4263	TRUE	4524	6455	9932;9933;9934	9934			9606;9606
NCAPH2	Condensin-2 complex subunit H2	NaN	H0YC55;A0A0A6YYG7;Q6IBW4-2;Q6IBW4;Q6IBW4-4	H0YC55;A0A0A6YYG7;Q6IBW4-2;Q6IBW4;Q6IBW4-4	1;1;1;1;1	1;1;1;1;1	1;1;1;1;1	tr|H0YC55|H0YC55_HUMAN Isoform of Q6IBW4, Condensin-2 complex subunit H2 (Fragment) OS=Homo sapiens OX=9606 GN=NCAPH2 PE=1 SV=1;tr|A0A0A6YYG7|A0A0A6YYG7_HUMAN Isoform of Q6IBW4, Condensin-2 complex subunit H2 OS=Homo sapiens OX=9606 GN=NCAPH2 PE=1 SV=1;sp|	5	1	1	1	7.1	7.1	7.1	15.955	141	141;589;583;605;606	0.002	6.7239	NaN	NaN	NaN	1	0	Median	724490	360950	363540	FVQETELSQR				87	2764	TRUE	2943	4173	6407	6407			9606;9606;9606;9606;9606
	Putative NPIP-like protein LOC729978	NaN	F8VY45;A0A0A6YYH2;A6NJ64	F8VY45;A0A0A6YYH2;A6NJ64	1;1;1	1;1;1	1;1;1	tr|F8VY45|F8VY45_HUMAN Isoform of A0A0A6YYH2, Nuclear pore complex-interacting protein family, member B2 (Fragment) OS=Homo sapiens OX=9606 GN=NPIPB2 PE=4 SV=1;tr|A0A0A6YYH2|A0A0A6YYH2_HUMAN Uncharacterized protein OS=Homo sapiens OX=9606 PE=4 SV=1;sp|A6NJ	3	1	1	1	3.6	3.6	3.6	35.301	307	307;397;397	1	-2	NaN	NaN	NaN	0	0	Median	0	0	0	LDMKEIHTYMK	+			89	4638	TRUE	4921	7029	10765	10765	67;68	173;180	9606;9606;9606
CFAP43		NaN	Q5TA05;A0A0C4DFU9;Q5TA04	Q5TA05;A0A0C4DFU9;Q5TA04	1;1;1	1;1;1	1;1;1	tr|Q5TA05|Q5TA05_HUMAN Isoform of Q8NDM7, Cilia- and flagella-associated protein 43 OS=Homo sapiens OX=9606 GN=CFAP43 PE=1 SV=1;tr|A0A0C4DFU9|A0A0C4DFU9_HUMAN Isoform of Q8NDM7, Cilia- and flagella-associated protein 43 OS=Homo sapiens OX=9606 GN=CFAP43 PE	3	1	1	1	5	5	5	34.601	303	303;412;870	1	-2	NaN	NaN	NaN	1	1	Median	492690	448490	44202	MATNIPCEVVAFSDR	+			95	5734	TRUE	6086	8659	13175	13175	82	1	9606;9606;9606
SYNE1	Nesprin-1	NaN	E7ENN3;A0A0C4DG40;Q8NF91-8;Q8NF91-2;Q8NF91-4;Q8NF91	E7ENN3;A0A0C4DG40;Q8NF91-8;Q8NF91-2;Q8NF91-4;Q8NF91	1;1;1;1;1;1	1;1;1;1;1;1	1;1;1;1;1;1	tr|E7ENN3|E7ENN3_HUMAN Isoform of Q8NF91, Nesprin-1 OS=Homo sapiens OX=9606 GN=SYNE1 PE=1 SV=2;tr|A0A0C4DG40|A0A0C4DG40_HUMAN Isoform of Q8NF91, Nesprin-1 OS=Homo sapiens OX=9606 GN=SYNE1 PE=1 SV=1;sp|Q8NF91-8|SYNE1-8_HUMAN Isoform of Q8NF91, Isoform 8 of	6	1	1	1	0.1	0.1	0.1	964.83	8392	8392;8749;3212;3321;8749;8797	0.0020229	6.8003	NaN	NaN	NaN	1	0	Median	5020600	3044200	1976400	VLFTSLADNK				97	8763	TRUE	9409	13517	20606;20607	20607			9606;9606;9606;9606;9606;9606
ARL6IP4	ADP-ribosylation factor-like protein 6-interacting protein 4	NaN	F8WEP2;A0A0C4DH18;F5GYV5;H7BZV4;A0A0C4DG62;F8WCT1;Q66PJ3-7;Q66PJ3-5;Q66PJ3-4;Q66PJ3-3;Q66PJ3-2;Q66PJ3	F8WEP2;A0A0C4DH18;F5GYV5;H7BZV4;A0A0C4DG62;F8WCT1;Q66PJ3-7;Q66PJ3-5;Q66PJ3-4;Q66PJ3-3;Q66PJ3-2;Q66PJ3	1;1;1;1;1;1;1;1;1;1;1;1	1;1;1;1;1;1;1;1;1;1;1;1	1;1;1;1;1;1;1;1;1;1;1;1	tr|F8WEP2|F8WEP2_HUMAN Isoform of Q66PJ3, ADP-ribosylation factor-like protein 6-interacting protein 4 OS=Homo sapiens OX=9606 GN=ARL6IP4 PE=1 SV=1;tr|A0A0C4DH18|A0A0C4DH18_HUMAN Isoform of Q66PJ3, ADP-ribosylation factor-like protein 6-interacting protein	12	1	1	1	7.1	7.1	7.1	19.131	170	170;181;211;216;218;229;226;365;399;402;413;421	0.0014065	7.2785	NaN	NaN	NaN	1	0	Median	221180	94652	126530	GDGEVLEEIVTK				98	2867	TRUE	3050	4317	6636	6636			9606;9606;9606;9606;9606;9606;9606;9606;9606;9606;9606;9606
HLTF	Helicase-like transcription factor	NaN	H7C5K0;A0A0C4DGA6;Q14527-2;Q14527	H7C5K0;A0A0C4DGA6;Q14527-2;Q14527	1;1;1;1	1;1;1;1	1;1;1;1	tr|H7C5K0|H7C5K0_HUMAN Isoform of Q14527, Helicase-like transcription factor (Fragment) OS=Homo sapiens OX=9606 GN=HLTF PE=1 SV=1;tr|A0A0C4DGA6|A0A0C4DGA6_HUMAN Isoform of Q14527, Helicase-like transcription factor OS=Homo sapiens OX=9606 GN=HLTF PE=1 SV=1	4	1	1	1	3.1	3.1	3.1	48.033	425	425;1008;887;1009	0.0020647	7.047	NaN	NaN	NaN	1	0	Median	1047300	299920	747380	AGGVGLNLSAASR				100	321	TRUE	338	466	700	700			9606;9606;9606;9606
ALB	Serum albumin	NaN	A0A0C4DGB6;CON__P02768-1;P02768;A0A087WWT3;P02768-3;H7C013	A0A0C4DGB6;CON__P02768-1;P02768;A0A087WWT3;P02768-3	6;6;6;4;4;2	1;1;1;1;1;1	1;1;1;1;1;1	tr|A0A0C4DGB6|A0A0C4DGB6_HUMAN Isoform of P02768, Serum albumin OS=Homo sapiens OX=9606 GN=ALB PE=1 SV=1;;sp|P02768|ALBU_HUMAN Serum albumin OS=Homo sapiens OX=9606 GN=ALB PE=1 SV=2;tr|A0A087WWT3|A0A087WWT3_HUMAN Isoform of P02768, Serum albumin OS=Homo sa	6	6	1	1	8.4	2.2	2.2	69.226	604	604;609;609;396;396;197	0.0014368	7.6982	NaN	NaN	NaN	0	0	Median	91165	91165	0	CCTESLVNR;KVPQVSTPTLVEVSR;LVTDLTK;TCVADESAENCDK;VPQVSTPTLVEVSR;YLYEIAR			+	101	1006;4463;5648;7754;8950;9462	False;False;False;True;False;False	1071;4740;5988;8340;9613;10150	1519;1520;1521;6770;6771;6772;6773;6774;6775;8522;8523;8524;8525;8526;11927;13793;13794;14574;14575	2284;2285;2286;10367;10368;10369;10370;10371;10372;10373;10374;10375;10376;10377;12967;12968;12969;12970;12971;18136;21058;21059;21060;22255;22256	2286;10371;12971;18136;21060;22256			9606;-1;9606;9606;9606;9606
ZNF563		NaN	Q8TA94-2;A0A0C4DGQ9	Q8TA94-2;A0A0C4DGQ9	1;1	1;1	1;1	sp|Q8TA94-2|ZN563-2_HUMAN Isoform of Q8TA94, Isoform 2 of Zinc finger protein 563 OS=Homo sapiens OX=9606 GN=ZNF563 PE=4 SV=1;tr|A0A0C4DGQ9|A0A0C4DGQ9_HUMAN Isoform of Q8TA94, Zinc finger protein 563 OS=Homo sapiens OX=9606 GN=ZNF563 PE=1 SV=1	2	1	1	1	3.5	3.5	3.5	26.624	228	228;229	1	-2	NaN	NaN	NaN	1	0	Median	333430	201230	132210	MNVSSVLK	+			105	5912	TRUE	6349	9011	13698	13698	92	214	9606;9606
TBL1XR1	F-box-like/WD repeat-containing protein TBL1XR1	NaN	C9JLJ1;C9JCK0;C9JBN1;A0A0D9SF25;A0A1B0GUU2;F8W9D8;C9IYU9;A0A0D9SF63;Q9BZK7	C9JLJ1;C9JCK0;C9JBN1;A0A0D9SF25;A0A1B0GUU2;F8W9D8;C9IYU9;A0A0D9SF63;Q9BZK7	1;1;1;1;1;1;1;1;1	1;1;1;1;1;1;1;1;1	1;1;1;1;1;1;1;1;1	tr|C9JLJ1|C9JLJ1_HUMAN Isoform of Q9BZK7, F-box-like/WD repeat-containing protein TBL1XR1 (Fragment) OS=Homo sapiens OX=9606 GN=TBL1XR1 PE=1 SV=1;tr|C9JCK0|C9JCK0_HUMAN Isoform of Q9BZK7, F-box-like/WD repeat-containing protein TBL1XR1 (Fragment) OS=Homo s	9	1	1	1	41.8	41.8	41.8	5.5529	55	55;73;75;122;131;144;145;474;514	0.0014472	7.995	NaN	NaN	NaN	1	0	Median	999250	541690	457560	LAQQQAAAAAAAAAAASQQGSAK				110	4574	TRUE	4854	6933	10616;10617	10617			9606;9606;9606;9606;9606;9606;9606;9606;9606
CHTF18	Chromosome transmission fidelity protein 18 homolog	NaN	E7EXA6;A0A0D9SF58;Q8WVB6-3;Q8WVB6;Q8WVB6-2	E7EXA6;A0A0D9SF58;Q8WVB6-3;Q8WVB6;Q8WVB6-2	1;1;1;1;1	1;1;1;1;1	1;1;1;1;1	tr|E7EXA6|E7EXA6_HUMAN Isoform of Q8WVB6, Chromosome transmission fidelity protein 18 homolog OS=Homo sapiens OX=9606 GN=CHTF18 PE=1 SV=2;tr|A0A0D9SF58|A0A0D9SF58_HUMAN Isoform of Q8WVB6, Chromosome transmission fidelity protein 18 homolog OS=Homo sapiens	5	1	1	1	1.1	1.1	1.1	107.43	975	975;1184;557;975;1003	0.0044843	6.464	NaN	NaN	NaN	1	0	Median	154600	92086	62513	VVQGLFDNFLR				112	9165	TRUE	9838	14098	21513	21513			9606;9606;9606;9606;9606
FHL1	Four and a half LIM domains protein 1	NaN	A0A0D9SG53;Q5JXH8;Q5JXI8;A0A494C0D6;Q5JXI2;Q5JXI3;A0A0D9SGB2;Q5JXH7;A0A0D9SFZ9;Q5JXH9;A0A0D9SFB0;A0A0D9SFI6;Q5JXI0;Q13642-3;Q13642-1;Q13642-5;Q13642-4;Q13642	A0A0D9SG53;Q5JXH8;Q5JXI8;A0A494C0D6;Q5JXI2;Q5JXI3;A0A0D9SGB2;Q5JXH7;A0A0D9SFZ9;Q5JXH9;A0A0D9SFB0;A0A0D9SFI6;Q5JXI0;Q13642-3;Q13642-1;Q13642-5;Q13642-4;Q13642	1;1;1;1;1;1;1;1;1;1;1;1;1;1;1;1;1;1	1;1;1;1;1;1;1;1;1;1;1;1;1;1;1;1;1;1	1;1;1;1;1;1;1;1;1;1;1;1;1;1;1;1;1;1	tr|A0A0D9SG53|A0A0D9SG53_HUMAN Isoform of Q13642, Four and a half LIM domains protein 1 (Fragment) OS=Homo sapiens OX=9606 GN=FHL1 PE=1 SV=1;tr|Q5JXH8|Q5JXH8_HUMAN Isoform of Q13642, Four and a half LIM domains protein 1 (Fragment) OS=Homo sapiens OX=9606	18	1	1	1	9.2	9.2	9.2	15.015	130	130;204;257;257;210;207;138;205;175;155;152;147;141;194;280;296;309;323	0.0020776	7.1229	NaN	NaN	NaN	1	0	Median	183240	98252	84989	AIVAGDQNVEYK				113	438	TRUE	461	644	972;973	973			9606;9606;9606;9606;9606;9606;9606;9606;9606;9606;9606;9606;9606;9606;9606;9606;9606;9606
RXRB	Retinoic acid receptor RXR-beta	NaN	A0A0G2JHI1;A0A0G2JKR7;P28702;P28702-3	A0A0G2JHI1;A0A0G2JKR7;P28702;P28702-3	1;1;1;1	1;1;1;1	1;1;1;1	tr|A0A0G2JHI1|A0A0G2JHI1_HUMAN Isoform of P28702, Retinoic acid receptor RXR-beta (Fragment) OS=Homo sapiens OX=9606 GN=RXRB PE=1 SV=1;tr|A0A0G2JKR7|A0A0G2JKR7_HUMAN Isoform of P28702, Retinoic acid receptor RXR-beta OS=Homo sapiens OX=9606 GN=RXRB PE=1 SV	4	1	1	1	8.3	8.3	8.3	10.636	96	96;347;533;537	1	-2	NaN	NaN	NaN	0	0	Median	303610	303610	0	MRDMRMDK	+			117	5940	TRUE	6393	9068	13779	13779	100;101;102	74;77;79	9606;9606;9606;9606
SSBP1	Single-stranded DNA-binding protein, mitochondrial	NaN	C9K0U8;A0A0G2JLD8;E7EUY5;Q04837	C9K0U8;A0A0G2JLD8;E7EUY5;Q04837	1;1;1;1	1;1;1;1	1;1;1;1	tr|C9K0U8|C9K0U8_HUMAN Isoform of Q04837, Single-stranded DNA-binding protein, mitochondrial (Fragment) OS=Homo sapiens OX=9606 GN=SSBP1 PE=1 SV=1;tr|A0A0G2JLD8|A0A0G2JLD8_HUMAN Isoform of Q04837, Single-stranded DNA-binding protein, mitochondrial (Fragmen	4	1	1	1	12.4	12.4	12.4	14.131	121	121;134;135;148	0.002038	6.877	NaN	NaN	NaN	1	0	Median	1583700	946620	637030	SGDSEVYQLGDVSQK				120	7143	TRUE	7689	10962	16678;16679	16679			9606;9606;9606;9606
DECR2	Peroxisomal 2,4-dienoyl-CoA reductase	NaN	A0A0J9YWI0;Q4VXZ8;Q9NUI1-3;Q9NUI1	A0A0J9YWI0;Q4VXZ8;Q9NUI1-3;Q9NUI1	1;1;1;1	1;1;1;1	1;1;1;1	tr|A0A0J9YWI0|A0A0J9YWI0_HUMAN Isoform of Q9NUI1, Peroxisomal 2,4-dienoyl-CoA reductase (Fragment) OS=Homo sapiens OX=9606 GN=DECR2 PE=1 SV=1;tr|Q4VXZ8|Q4VXZ8_HUMAN Isoform of Q9NUI1, Peroxisomal 2,4-dienoyl-CoA reductase OS=Homo sapiens OX=9606 GN=DECR2 P	4	1	1	1	6.7	6.7	6.7	25.141	238	238;280;244;292	0.0014641	8.7333	NaN	NaN	NaN	1	0	Median	391350	256130	135210	VNSLAPGPISGTEGLR				123	8909	TRUE	9568	13737	20975;20976;20977	20977			9606;9606;9606;9606
		NaN	A0A0R4J2F3;P0DPB6	A0A0R4J2F3;P0DPB6	1;1	1;1	1;1	tr|A0A0R4J2F3|A0A0R4J2F3_HUMAN Isoform of P0DPB6, Protein POLR1D, isoform 2 OS=Homo sapiens OX=9606 GN=POLR1D PE=1 SV=1;sp|P0DPB6|RPAC2_HUMAN DNA-directed RNA polymerases I and III subunit RPAC2 OS=Homo sapiens OX=9606 GN=POLR1D PE=1 SV=1	2	1	1	1	11.2	11.2	11.2	13.262	116	116;133	0.0020367	6.8697	NaN	NaN	NaN	1	0	Median	319730	164470	155260	TALEMVQAAGTDR				125	7707	TRUE	8292	11861	18036;18037	18036			9606;9606
SYPL1	Synaptophysin-like protein 1	NaN	A0A0U1RQT9;C9JYN0;Q16563-2;Q16563	A0A0U1RQT9;C9JYN0;Q16563-2;Q16563	1;1;1;1	1;1;1;1	1;1;1;1	tr|A0A0U1RQT9|A0A0U1RQT9_HUMAN Isoform of Q16563, Synaptophysin-like protein 1 (Fragment) OS=Homo sapiens OX=9606 GN=SYPL1 PE=1 SV=1;tr|C9JYN0|C9JYN0_HUMAN Isoform of Q16563, Synaptophysin-like protein 1 OS=Homo sapiens OX=9606 GN=SYPL1 PE=1 SV=1;sp|Q16563	4	1	1	1	8.1	8.1	8.1	14.967	135	135;224;241;259	0.0056675	6.3609	NaN	NaN	NaN	1	0	Median	353600	232220	121390	TVTATFGYPFR				126	8300	TRUE	8921	12795	19470	19470			9606;9606;9606;9606
		NaN	A0A0U1RRJ4	A0A0U1RRJ4	1	1	1	tr|A0A0U1RRJ4|A0A0U1RRJ4_HUMAN Isoform of P51531, Probable global transcription activator SNF2L2 (Fragment) OS=Homo sapiens OX=9606 GN=SMARCA2 PE=1 SV=1	1	1	1	1	26.5	26.5	26.5	7.9231	68	68	1	-2	NaN	NaN	NaN	0	0	Median	1105200	1105200	0	MAIEDGNLEEMEEEVRLK	+			127	5718	TRUE	6063	8629	13132	13132	110;111	1;11	9606
HLA-C;HLA-B	HLA class I histocompatibility antigen, Cw-7 alpha chain;HLA class I histocompatibility antigen, B-73 alpha chain;HLA class I histocompatibility antigen, Cw-17 alpha chain	NaN	O19617;A0A140T921;A2AEA2;A0A140T9H5;A0A140T9U8;P10321;Q31612;Q95604;A0A1W2PRU9	O19617;A0A140T921;A2AEA2;A0A140T9H5;A0A140T9U8;P10321;Q31612;Q95604;A0A1W2PRU9	7;7;7;7;7;7;6;6;5	1;1;1;1;1;1;1;1;1	0;0;0;0;0;0;0;0;0	tr|O19617|O19617_HUMAN Isoform of Q95604, HLA class I antigen OS=Homo sapiens OX=9606 GN=HLA-C PE=1 SV=1;tr|A0A140T921|A0A140T921_HUMAN Isoform of Q95604, HLA class I histocompatibility antigen, Cw-6 alpha chain OS=Homo sapiens OX=9606 GN=HLA-C PE=1 SV=1;t	9	7	1	0	20.2	3.6	0	40.71	366	366;368;372;372;397;366;363;372;244	0.0014015	7.2325	NaN	NaN	NaN	1	0	Median	1100600	627730	472860	APWVEQEGPEYWDR;DGEDQTQDTELVETR;DGEDQTQDTELVETRPAGDGTFQK;FDSDAASPR;PAGDGTFQK;SWTAADTAAQITQR;WAAVVVPSGQEQR				131	684;1159;1160;2483;6456;7659;9230	False;False;False;False;False;False;True	729;1235;1236;2642;6964;8239;9905	1030;1763;1764;3760;9958;11757;14207	1543;2661;2662;2663;2664;2665;5770;5771;15177;17884;21679;21680	1543;2662;2665;5770;15177;17884;21679			9606;9606;9606;9606;9606;9606;9606;9606;9606
CHD1;CHD2	Chromodomain-helicase-DNA-binding protein 1;Chromodomain-helicase-DNA-binding protein 2	NaN	A0A1B0GTU9;O14646-2;O14646;O14647-2;O14647	A0A1B0GTU9;O14646-2;O14646;O14647-2;O14647	1;1;1;1;1	1;1;1;1;1	1;1;1;1;1	tr|A0A1B0GTU9|A0A1B0GTU9_HUMAN Isoform of O14647, Chromodomain-helicase-DNA-binding protein 2 (Fragment) OS=Homo sapiens OX=9606 GN=CHD2 PE=1 SV=1;sp|O14646-2|CHD1-2_HUMAN Isoform of O14646, Isoform 2 of Chromodomain-helicase-DNA-binding protein 1 OS=Homo	5	1	1	1	1	1	1	110.15	954	954;1709;1710;1739;1828	0.0091296	6.1522	NaN	NaN	NaN	1	0	Median	288430	137720	150710	MVLDHLVIQR				133	5971	TRUE	6429	9116	13839	13839			9606;9606;9606;9606;9606
HMOX2	Heme oxygenase 2	NaN	I3L276;I3L4P8;A0A1B0GXH0;I3L463;I3L159;I3L1F5;P30519	I3L276;I3L4P8;A0A1B0GXH0;I3L463;I3L159;I3L1F5;P30519	1;1;1;1;1;1;1	1;1;1;1;1;1;1	1;1;1;1;1;1;1	tr|I3L276|I3L276_HUMAN Isoform of P30519, Heme oxygenase 2 (Fragment) OS=Homo sapiens OX=9606 GN=HMOX2 PE=1 SV=1;tr|I3L4P8|I3L4P8_HUMAN Isoform of P30519, Heme oxygenase 2 (Fragment) OS=Homo sapiens OX=9606 GN=HMOX2 PE=1 SV=8;tr|A0A1B0GXH0|A0A1B0GXH0_HUMAN	7	1	1	1	14.5	14.5	14.5	12.647	110	110;130;131;132;229;238;316	0.0038936	6.5564	NaN	NaN	NaN	1	1	Median	223690	146330	77357	SAEVETSEGVDESEKK				136	6951	TRUE	7486	10702	16275;16276	16276			9606;9606;9606;9606;9606;9606;9606
TRIM3	Tripartite motif-containing protein 3	NaN	A0A1W2PPI7;O75382-4;O75382-3;O75382-2;O75382	A0A1W2PPI7;O75382-4;O75382-3;O75382-2;O75382	1;1;1;1;1	1;1;1;1;1	1;1;1;1;1	tr|A0A1W2PPI7|A0A1W2PPI7_HUMAN Isoform of O75382, Tripartite motif-containing protein 3 OS=Homo sapiens OX=9606 GN=TRIM3 PE=1 SV=1;sp|O75382-4|TRIM3-4_HUMAN Isoform of O75382, Isoform 4 of Tripartite motif-containing protein 3 OS=Homo sapiens OX=9606 GN=TR	5	1	1	1	1.4	1.4	1.4	76.13	703	703;625;665;733;744	1	-2	NaN	NaN	NaN	1	0	Median	237360	99602	137760	PSSMYSTGGK	+			138	6533	TRUE	7047	10072	15361	15361	116	415	9606;9606;9606;9606;9606
TCEA1	Transcription elongation factor A protein 1	NaN	E5RK46;A0A1W2PS15;E5RFI1;A0A1W2PPV7;E5RJ93;E5RIS7;B7Z4S1;A0A1W2PRL9;A0A1W2PPZ5;P23193-2;P23193	E5RK46;A0A1W2PS15;E5RFI1;A0A1W2PPV7;E5RJ93;E5RIS7;B7Z4S1;A0A1W2PRL9;A0A1W2PPZ5;P23193-2;P23193	1;1;1;1;1;1;1;1;1;1;1	1;1;1;1;1;1;1;1;1;1;1	1;1;1;1;1;1;1;1;1;1;1	tr|E5RK46|E5RK46_HUMAN Isoform of P23193, Transcription elongation factor A protein 1 OS=Homo sapiens OX=9606 GN=TCEA1 PE=1 SV=1;tr|A0A1W2PS15|A0A1W2PS15_HUMAN Isoform of P23193, Transcription elongation factor A protein 1 OS=Homo sapiens OX=9606 GN=TCEA1	11	1	1	1	24.4	24.4	24.4	5.2283	45	45;45;47;47;90;111;117;280;301;280;301	1	-2	NaN	NaN	NaN	1	0	Median	280430	212640	67790	MEDEVVRFAKK	+			140	5766	TRUE	6132	8711	13269	13269	117	1	9606;9606;9606;9606;9606;9606;9606;9606;9606;9606;9606
TPK1	Thiamin pyrophosphokinase 1	NaN	A0A1W2PQB3;F8VRJ6;Q9H3S4-2;Q9H3S4	A0A1W2PQB3;F8VRJ6;Q9H3S4-2;Q9H3S4	1;1;1;1	1;1;1;1	1;1;1;1	tr|A0A1W2PQB3|A0A1W2PQB3_HUMAN Isoform of Q9H3S4, Thiamin pyrophosphokinase 1 OS=Homo sapiens OX=9606 GN=TPK1 PE=1 SV=1;tr|F8VRJ6|F8VRJ6_HUMAN Isoform of Q9H3S4, Thiamin pyrophosphokinase 1 (Fragment) OS=Homo sapiens OX=9606 GN=TPK1 PE=1 SV=8;sp|Q9H3S4-2|T	4	1	1	1	9.6	9.6	9.6	15.315	135	135;166;124;243	0.0014104	7.3346	NaN	NaN	NaN	1	0	Median	517450	310280	207170	VDVIVTLGGLAGR				143	8469	TRUE	9099	13055	19886	19886			9606;9606;9606;9606
FAM131A	Protein FAM131A	NaN	A0A1W2PQP7;Q6UXB0	A0A1W2PQP7;Q6UXB0	1;1	1;1	1;1	tr|A0A1W2PQP7|A0A1W2PQP7_HUMAN Isoform of Q6UXB0, Protein FAM131A OS=Homo sapiens OX=9606 GN=FAM131A PE=4 SV=1;sp|Q6UXB0|F131A_HUMAN Protein FAM131A OS=Homo sapiens OX=9606 GN=FAM131A PE=2 SV=2	2	1	1	1	2.5	2.5	2.5	38.664	359	359;366	1	-2	NaN	NaN	NaN	0	0	Median	0	0	0	MPMISVLGK	+			144	5915	TRUE	6353	9015	13704	13704	119;120	1;3	9606;9606
RDX	Radixin	NaN	A0A2R8Y7M3;A0A2R8Y5S7;P35241-4;P35241;P35241-5;P35241-2	A0A2R8Y7M3;A0A2R8Y5S7;P35241-4;P35241;P35241-5	5;5;5;5;5;1	1;1;1;1;1;1	1;1;1;1;1;1	tr|A0A2R8Y7M3|A0A2R8Y7M3_HUMAN Isoform of P35241, Radixin OS=Homo sapiens OX=9606 GN=RDX PE=1 SV=1;tr|A0A2R8Y5S7|A0A2R8Y5S7_HUMAN Isoform of P35241, Radixin OS=Homo sapiens OX=9606 GN=RDX PE=1 SV=1;sp|P35241-4|RADI-4_HUMAN Isoform of P35241, Isoform 4 of R	6	5	1	1	7.7	1.9	1.9	62.93	534	534;590;447;583;604;257	1	-2	NaN	NaN	NaN	1	0	Median	861520	482750	378770	AFAAQEDLEK;APDFVFYAPR;IGFPWSEIR;KAPDFVFYAPR;KPDTIEVQQMK	+			155	274;651;3792;4301;4411	True;False;False;False;False	291;695;4015;4563;4682;4683	392;967;5719;5720;6515;6682;6683	588;589;1456;1457;1458;8798;8799;10027;10245;10246	588;1457;8798;10027;10245	128	305	9606;9606;9606;9606;9606;9606
PMS2;PMS2CL	Protein PMS2CL;Mismatch repair endonuclease PMS2	NaN	A0A2R8Y6S3;C9J167;Q68D20;P54278-3;P54278	A0A2R8Y6S3;C9J167;Q68D20;P54278-3;P54278	1;1;1;1;1	1;1;1;1;1	1;1;1;1;1	tr|A0A2R8Y6S3|A0A2R8Y6S3_HUMAN Isoform of P54278, Mismatch repair endonuclease PMS2 OS=Homo sapiens OX=9606 GN=PMS2 PE=1 SV=1;tr|C9J167|C9J167_HUMAN Isoform of P54278, Mismatch repair endonuclease PMS2 OS=Homo sapiens OX=9606 GN=PMS2 PE=1 SV=2;sp|Q68D20|PM	5	1	1	1	1.8	1.8	1.8	81.331	727	727;756;193;572;862	0.0033267	6.7001	NaN	NaN	NaN	0	0	Median	0	0	0	MHAADLEKPMVEK				159	5832	TRUE	6234	8851	13477	13477	137	252	9606;9606;9606;9606;9606
RAB1B;RAB15;RAB8B;RAB1A;RAB10;RAB1C;RAB13;RAB8A	Ras-related protein Rab-1A;Ras-related protein Rab-10;Putative Ras-related protein Rab-1C;Ras-related protein Rab-13;Ras-related protein Rab-8B;Ras-related protein Rab-8A;Ras-related protein Rab-15;Ras-related protein Rab-1B	NaN	A0A2R8YDI9;E9PLD0;G3V196;H0YLJ8;H0YNE9;E7END7;A0A2R8YFB8;H0YMN7;H0YL94;P62820-2;P62820-3;P61026;Q92928;P51153;P62820;Q92930;P61006;P61006-2;P59190-2;P59190;Q9H0U4	A0A2R8YDI9;E9PLD0;G3V196;H0YLJ8;H0YNE9;E7END7;A0A2R8YFB8;H0YMN7;H0YL94;P62820-2;P62820-3;P61026;Q92928;P51153;P62820;Q92930;P61006;P61006-2;P59190-2;P59190;Q9H0U4	1;1;1;1;1;1;1;1;1;1;1;1;1;1;1;1;1;1;1;1;1	1;1;1;1;1;1;1;1;1;1;1;1;1;1;1;1;1;1;1;1;1	1;1;1;1;1;1;1;1;1;1;1;1;1;1;1;1;1;1;1;1;1	tr|A0A2R8YDI9|A0A2R8YDI9_HUMAN Isoform of P59190, Ras-related protein Rab-15 OS=Homo sapiens OX=9606 GN=RAB15 PE=1 SV=1;tr|E9PLD0|E9PLD0_HUMAN Isoform of Q9H0U4, Ras-related protein Rab-1B OS=Homo sapiens OX=9606 GN=RAB1B PE=1 SV=1;tr|G3V196|G3V196_HUMAN I	21	1	1	1	25	25	25	4.8876	44	44;169;237;47;188;173;246;92;48;141;129;200;201;203;205;207;207;207;208;212;201	0.002008	6.7394	NaN	NaN	NaN	1	0	Median	1101800	795450	306400	LLLIGDSGVGK				167	5101	TRUE	5410	7740	11800;11801	11801			9606;9606;9606;9606;9606;9606;9606;9606;9606;9606;9606;9606;9606;9606;9606;9606;9606;9606;9606;9606;9606
WIZ	Protein Wiz	NaN	B9EGQ5;M0QXA7;A0A2R8YFV2;O95785-2;O95785-4;O95785-3;O95785	B9EGQ5;M0QXA7;A0A2R8YFV2;O95785-2;O95785-4;O95785-3;O95785	1;1;1;1;1;1;1	1;1;1;1;1;1;1	1;1;1;1;1;1;1	tr|B9EGQ5|B9EGQ5_HUMAN Isoform of O95785, Protein Wiz OS=Homo sapiens OX=9606 GN=WIZ PE=1 SV=1;tr|M0QXA7|M0QXA7_HUMAN Isoform of O95785, Protein Wiz OS=Homo sapiens OX=9606 GN=WIZ PE=1 SV=1;tr|A0A2R8YFV2|A0A2R8YFV2_HUMAN Isoform of O95785, Protein Wiz OS=H	7	1	1	1	1.3	1.3	1.3	89.054	832	832;968;1699;794;835;965;1651	0.007472	6.3216	NaN	NaN	NaN	1	0	Median	307490	154260	153230	GGEDTNDLQQK				170	2978	TRUE	3166	4485	6892	6892			9606;9606;9606;9606;9606;9606;9606
AP1S1	AP-1 complex subunit sigma-1A	NaN	A0A2R8YGH5;H7C1E4;P61966	A0A2R8YGH5;H7C1E4;P61966	1;1;1	1;1;1	1;1;1	tr|A0A2R8YGH5|A0A2R8YGH5_HUMAN Isoform of P61966, AP complex subunit sigma OS=Homo sapiens OX=9606 GN=AP1S1 PE=1 SV=1;tr|H7C1E4|H7C1E4_HUMAN Isoform of P61966, AP complex subunit sigma (Fragment) OS=Homo sapiens OX=9606 GN=AP1S1 PE=1 SV=1;sp|P61966|AP1S1_H	3	1	1	1	10.2	10.2	10.2	18.602	157	157;191;158	0.0020013	6.7258	NaN	NaN	NaN	1	0	Median	239050	109580	129480	AIEQADLLQEEDESPR				172	390	TRUE	409	559	843	843			9606;9606;9606
ESRP1;ESRP2	Epithelial splicing regulatory protein 1;Epithelial splicing regulatory protein 2	NaN	H0YBR2;H0YBB3;A0A2U3TZN9;Q6NXG1-2;Q6NXG1-5;Q6NXG1-4;Q6NXG1-3;Q6NXG1;Q9H6T0-2;Q9H6T0	H0YBR2;H0YBB3;A0A2U3TZN9;Q6NXG1-2;Q6NXG1-5;Q6NXG1-4;Q6NXG1-3;Q6NXG1;Q9H6T0-2;Q9H6T0	2;2;2;2;2;2;2;2;1;1	2;2;2;2;2;2;2;2;1;1	2;2;2;2;2;2;2;2;1;1	tr|H0YBR2|H0YBR2_HUMAN Isoform of Q6NXG1, Epithelial-splicing regulatory protein 1 (Fragment) OS=Homo sapiens OX=9606 GN=ESRP1 PE=1 SV=1;tr|H0YBB3|H0YBB3_HUMAN Isoform of Q6NXG1, Epithelial-splicing regulatory protein 1 (Fragment) OS=Homo sapiens OX=9606 G	10	2	2	2	4.6	4.6	4.6	56.035	502	502;522;604;608;659;663;677;681;717;727	0	20.983	NaN	NaN	NaN	1	0	Median	794700	459890	334810	MELIDDNTVVR;STAAEVQQVLNR				174	5783;7544	True;True	6157;8122	8746;11601	13320;17653	13320;17653			9606;9606;9606;9606;9606;9606;9606;9606;9606;9606
PNPLA6	Neuropathy target esterase	NaN	A0A384DVU0;Q8IY17-5;Q8IY17-2;Q8IY17-3;Q8IY17	A0A384DVU0;Q8IY17-5;Q8IY17-2;Q8IY17-3;Q8IY17	1;1;1;1;1	1;1;1;1;1	1;1;1;1;1	tr|A0A384DVU0|A0A384DVU0_HUMAN Isoform of Q8IY17, Neuropathy target esterase OS=Homo sapiens OX=9606 GN=PNPLA6 PE=1 SV=1;sp|Q8IY17-5|PLPL6-5_HUMAN Isoform of Q8IY17, Isoform 5 of Neuropathy target esterase OS=Homo sapiens OX=9606 GN=PNPLA6 PE=1 SV=3;sp|Q8I	5	1	1	1	1	1	1	149.92	1365	1365;1300;1327;1374;1375	0.0079414	6.1959	NaN	NaN	NaN	0	0	Median	0	0	0	LGASALDSIQEFR				175	4824	TRUE	5121	7317	11183	11183			9606;9606;9606;9606;9606
CAAP1	Caspase activity and apoptosis inhibitor 1	NaN	A0A3B3ISJ3;Q9H8G2	A0A3B3ISJ3;Q9H8G2	1;1	1;1	1;1	tr|A0A3B3ISJ3|A0A3B3ISJ3_HUMAN Isoform of Q9H8G2, Caspase activity and apoptosis inhibitor 1 OS=Homo sapiens OX=9606 GN=CAAP1 PE=1 SV=1;sp|Q9H8G2|CAAP1_HUMAN Caspase activity and apoptosis inhibitor 1 OS=Homo sapiens OX=9606 GN=CAAP1 PE=1 SV=2	2	1	1	1	6.8	6.8	6.8	25.076	237	237;361	0.0039164	6.6016	NaN	NaN	NaN	1	0	Median	237380	123180	114190	STDSSSVSGSLQQETK				180	7550	TRUE	8128	11610	17669;17670	17669			9606;9606
DDX10	Probable ATP-dependent RNA helicase DDX10	NaN	A0A3B3ISR7;E9PIF2;Q13206	A0A3B3ISR7;E9PIF2;Q13206	2;2;2	2;2;2	2;2;2	tr|A0A3B3ISR7|A0A3B3ISR7_HUMAN Isoform of Q13206, RNA helicase OS=Homo sapiens OX=9606 GN=DDX10 PE=1 SV=1;tr|E9PIF2|E9PIF2_HUMAN Isoform of Q13206, RNA helicase OS=Homo sapiens OX=9606 GN=DDX10 PE=1 SV=1;sp|Q13206|DDX10_HUMAN Probable ATP-dependent RNA hel	3	2	2	2	3.5	3.5	3.5	77.798	679	679;835;875	0	13.57	NaN	NaN	NaN	1	0	Median	223760	133370	90388	APSLTNDEVEEFR;ELAYQTFEVLR				181	673;1993	True;True	718;2125	1005;3044	1510;4664	1510;4664			9606;9606;9606
EIF2B5	Translation initiation factor eIF-2B subunit epsilon	NaN	A0A3B3ITG6;A0A3B3IUB1;Q13144	A0A3B3ITG6;A0A3B3IUB1;Q13144	1;1;1	1;1;1	1;1;1	tr|A0A3B3ITG6|A0A3B3ITG6_HUMAN Isoform of Q13144, Translation initiation factor eIF-2B subunit epsilon (Fragment) OS=Homo sapiens OX=9606 GN=EIF2B5 PE=1 SV=1;tr|A0A3B3IUB1|A0A3B3IUB1_HUMAN Isoform of Q13144, Translation initiation factor eIF-2B subunit eps	3	1	1	1	2.2	2.2	2.2	60.823	546	546;729;721	0.003866	6.5139	NaN	NaN	NaN	1	0	Median	467590	265180	202410	VFQNEVLGTLQR				182	8553	TRUE	9190	13186	20104	20104			9606;9606;9606
		NaN	A0A3B3ITJ4	A0A3B3ITJ4	13	1	1	tr|A0A3B3ITJ4|A0A3B3ITJ4_HUMAN Isoform of P14866, Heterogeneous nuclear ribonucleoprotein L (Fragment) OS=Homo sapiens OX=9606 GN=HNRNPL PE=1 SV=1	1	13	1	1	33	3	3	59.218	537	537	1	-2	NaN	NaN	NaN	1	0	Median	553070	361160	191900	AITHLNNNFMFGQK;ASLNGADIYSGCCTLK;FSTPEQAAK;ISRPGDSDDSR;LCFSTAQHAS;MGPPVGGHR;NDQDTWDYTNPNLSGQGDPGSNPNKR;NPNGPYPYTLK;QPPLLGDHPAEYGEGR;SDALETLGFLNHYQMK;SKPGAAMVEMADGYAVDR;SSSGLLEWESK;TPASPVVHIR	+			183	433;787;2728;4165;4605;5828;6050;6297;6751;7002;7244;7528;8092	False;False;False;False;False;False;False;False;True;False;False;False;False	455;456;835;2906;4419;4888;6230;6522;6789;7278;7540;7798;8104;8702	634;635;636;637;638;1173;4119;6294;6993;8846;9248;9249;9686;9687;10390;10767;10768;11150;11151;11580;11581;12480	958;959;960;961;962;1753;6321;9674;10715;13470;14052;14053;14054;14055;14056;14731;14732;14733;14734;15826;16377;16378;16943;16944;16945;17622;17623;17624;18979	961;1753;6321;9674;10715;13470;14054;14733;15826;16378;16945;17624;18979	140;141;142;143	371;374;392;515	9606
GEMIN2	Gem-associated protein 2	NaN	H0YDP6;H0YEL0;A0A3B3IU42;O14893-3;O14893-2;O14893	H0YDP6;H0YEL0;A0A3B3IU42;O14893-3;O14893-2;O14893	1;1;1;1;1;1	1;1;1;1;1;1	1;1;1;1;1;1	tr|H0YDP6|H0YDP6_HUMAN Isoform of O14893, Gem-associated protein 2 (Fragment) OS=Homo sapiens OX=9606 GN=GEMIN2 PE=1 SV=8;tr|H0YEL0|H0YEL0_HUMAN Isoform of O14893, Gem-associated protein 2 (Fragment) OS=Homo sapiens OX=9606 GN=GEMIN2 PE=1 SV=1;tr|A0A3B3IU4	6	1	1	1	6.1	6.1	6.1	21.918	197	197;220;275;250;265;280	0.002045	6.9095	NaN	NaN	NaN	1	0	Median	631960	310780	321180	SQQLDSNVTMPK				186	7461	TRUE	8037	11481	17464;17465	17464	145	124	9606;9606;9606;9606;9606;9606
GLA	Alpha-galactosidase A	NaN	A0A3B3IUC4;P06280	A0A3B3IUC4;P06280	1;1	1;1	1;1	tr|A0A3B3IUC4|A0A3B3IUC4_HUMAN Isoform of P06280, Alpha-galactosidase OS=Homo sapiens OX=9606 GN=GLA PE=1 SV=1;sp|P06280|AGAL_HUMAN Alpha-galactosidase A OS=Homo sapiens OX=9606 GN=GLA PE=1 SV=1	2	1	1	1	2.3	2.3	2.3	53.283	470	470;429	0.0032658	6.6084	NaN	NaN	NaN	1	0	Median	426400	238980	187410	SYTIAVASLGK				187	7680	TRUE	8263	11801	17957	17957			9606;9606
KRI1	Protein KRI1 homolog	NaN	H0YFD2;F8WFC1;A0A494C108;Q8N9T8	H0YFD2;F8WFC1;A0A494C108;Q8N9T8	1;1;1;1	1;1;1;1	1;1;1;1	tr|H0YFD2|H0YFD2_HUMAN Isoform of Q8N9T8, Protein KRI1 homolog (Fragment) OS=Homo sapiens OX=9606 GN=KRI1 PE=1 SV=4;tr|F8WFC1|F8WFC1_HUMAN Isoform of Q8N9T8, Protein KRI1 homolog (Fragment) OS=Homo sapiens OX=9606 GN=KRI1 PE=1 SV=2;tr|A0A494C108|A0A494C108	4	1	1	1	7.5	7.5	7.5	21.872	186	186;197;709;703	0.002079	7.1487	NaN	NaN	NaN	1	0	Median	252710	149780	102930	LQETSSQSYVEEQK				194	5337	TRUE	5666	8095	12335;12336;12337	12337			9606;9606;9606;9606
PEPD	Xaa-Pro dipeptidase	NaN	A0A494C194;K7ES25;A0A494C165;P12955-3;P12955-2;P12955	A0A494C194;K7ES25;A0A494C165;P12955-3;P12955-2;P12955	1;1;1;1;1;1	1;1;1;1;1;1	1;1;1;1;1;1	tr|A0A494C194|A0A494C194_HUMAN Isoform of P12955, Xaa-Pro dipeptidase (Fragment) OS=Homo sapiens OX=9606 GN=PEPD PE=4 SV=1;tr|K7ES25|K7ES25_HUMAN Isoform of P12955, Xaa-Pro dipeptidase (Fragment) OS=Homo sapiens OX=9606 GN=PEPD PE=1 SV=3;tr|A0A494C165|A0A4	6	1	1	1	4.5	4.5	4.5	25.033	224	224;512;522;429;452;493	0.0050665	6.4095	NaN	NaN	NaN	1	0	Median	370320	235890	134430	VPLALFALNR				195	8938	TRUE	9599	13774	21026;21027	21026			9606;9606;9606;9606;9606;9606
PIP5K1A	Phosphatidylinositol 4-phosphate 5-kinase type-1 alpha	NaN	A6PW58;A2A5X0;A6PW57;Q99755-2;Q99755-4;Q99755-3;Q99755	A6PW58;A2A5X0;A6PW57;Q99755-2;Q99755-4;Q99755-3;Q99755	1;1;1;1;1;1;1	1;1;1;1;1;1;1	1;1;1;1;1;1;1	tr|A6PW58|A6PW58_HUMAN Isoform of Q99755, Phosphatidylinositol 4-phosphate 5-kinase type-1 alpha (Fragment) OS=Homo sapiens OX=9606 GN=PIP5K1A PE=1 SV=1;tr|A2A5X0|A2A5X0_HUMAN Isoform of Q99755, Phosphatidylinositol 4-phosphate 5-kinase type-1 alpha (Fragm	7	1	1	1	12.8	12.8	12.8	9.3986	86	86;101;550;500;522;549;562	0.0020935	7.205	NaN	NaN	NaN	1	0	Median	330910	154030	176880	SVDSSGETTYK				202	7600	TRUE	8179	11682	17774	17774			9606;9606;9606;9606;9606;9606;9606
HFM1	Probable ATP-dependent DNA helicase HFM1	NaN	A2PYH4	A2PYH4	1	1	1	sp|A2PYH4|HFM1_HUMAN Probable ATP-dependent DNA helicase HFM1 OS=Homo sapiens OX=9606 GN=HFM1 PE=1 SV=2	1	1	1	1	1.1	1.1	1.1	162.61	1435	1435	0.0038635	6.5104	NaN	NaN	NaN	1	0	Median	429150	223890	205260	DGAAYHHAGMELSDRK				203	1155	TRUE	1231	1759	2657	2657	148	590	9606
NBAS	Neuroblastoma-amplified sequence	NaN	H0Y5G7;A2RRP1-2;A2RRP1	H0Y5G7;A2RRP1-2;A2RRP1	1;1;1	1;1;1	1;1;1	tr|H0Y5G7|H0Y5G7_HUMAN Isoform of A2RRP1, Neuroblastoma-amplified sequence (Fragment) OS=Homo sapiens OX=9606 GN=NBAS PE=1 SV=1;sp|A2RRP1-2|NBAS-2_HUMAN Isoform of A2RRP1, Isoform 2 of Neuroblastoma-amplified sequence OS=Homo sapiens OX=9606 GN=NBAS PE=1 S	3	1	1	1	0.7	0.7	0.7	160.41	1419	1419;2251;2371	0.0062814	6.3505	NaN	NaN	NaN	1	1	Median	297890	226810	71085	VLSNTTTTTK				204	8830	TRUE	9479	13622	20770	20770			9606;9606;9606
LRRD1	Leucine-rich repeat and death domain-containing protein 1	NaN	A4D1F6	A4D1F6	1	1	1	sp|A4D1F6|LRRD1_HUMAN Leucine-rich repeat and death domain-containing protein 1 OS=Homo sapiens OX=9606 GN=LRRD1 PE=2 SV=2	1	1	1	1	1.4	1.4	1.4	98.034	860	860	0.0096911	6.1128	NaN	NaN	NaN	1	0	Median	553970	225730	328240	QNTLESTSSSGR				206	6743	TRUE	7270	10382	15817	15817			9606
POTEE;POTEF	POTE ankyrin domain family member E;POTE ankyrin domain family member F	NaN	Q6S8J3;A5A3E0;A6NC16;A0A087X067;Q6S8J3-3;Q6S8J3-2	Q6S8J3;A5A3E0	7;7;1;1;1;1	1;1;1;1;1;1	1;1;1;1;1;1	sp|Q6S8J3|POTEE_HUMAN POTE ankyrin domain family member E OS=Homo sapiens OX=9606 GN=POTEE PE=2 SV=3;sp|A5A3E0|POTEF_HUMAN POTE ankyrin domain family member F OS=Homo sapiens OX=9606 GN=POTEF PE=1 SV=2	6	7	1	1	7.2	1.5	1.5	121.36	1075	1075;1075;382;508;376;394	1	-2	NaN	NaN	NaN	0	0	Median	0	0	0	AGFAGDDAPR;AVFPSIVGR;AVFPSIVGRPR;IWHHTFYNELR;MVVEVDSMPAASSVKK;QEYDESGPSIVHR;SYELPDGQVITIGNER	+			207	312;915;916;4262;5981;6618;7665	False;False;False;False;True;False;False	329;973;974;4523;6446;7139;8246	451;452;453;1363;1364;1365;1366;1367;6454;9143;10190;10191;10192;10193;11766;11767;11768;11769;11770	676;677;678;679;680;681;2043;2044;2045;2046;2047;2048;2049;2050;9930;9931;13887;15544;15545;15546;15547;17900;17901;17902;17903;17904;17905;17906;17907;17908;17909;17910	680;2043;2048;9930;13887;15547;17906	149	8	9606;9606;9606;9606;9606;9606
SNRPE	Small nuclear ribonucleoprotein E	NaN	A6NHK2;P62304	A6NHK2;P62304	1;1	1;1	1;1	tr|A6NHK2|A6NHK2_HUMAN Isoform of P62304, Small nuclear ribonucleoprotein E OS=Homo sapiens OX=9606 GN=SNRPE PE=1 SV=1;sp|P62304|RUXE_HUMAN Small nuclear ribonucleoprotein E OS=Homo sapiens OX=9606 GN=SNRPE PE=1 SV=1	2	1	1	1	23.1	23.1	23.1	5.9248	52	52;92	0	12.658	NaN	NaN	NaN	0	0	Median	0	0	0	GDNITLLQSVSN				210	2873	TRUE	3056	4327	6653	6653			9606;9606
ZNF729	Zinc finger protein 729	NaN	A6NN14	A6NN14	1	1	1	sp|A6NN14|ZN729_HUMAN Zinc finger protein 729 OS=Homo sapiens OX=9606 GN=ZNF729 PE=2 SV=4	1	1	1	1	0.8	0.8	0.8	145.02	1252	1252	0.0038885	6.5534	NaN	NaN	NaN	1	0	Median	1167200	85402	1081800	AFSQSSILTK				214	296	TRUE	313	423	632	632			9606
MED20	Mediator of RNA polymerase II transcription subunit 20	NaN	B7ZBQ1;A6PVP4;B7ZBQ3;Q9H944-2;Q9H944	B7ZBQ1;A6PVP4;B7ZBQ3;Q9H944-2;Q9H944	1;1;1;1;1	1;1;1;1;1	1;1;1;1;1	tr|B7ZBQ1|B7ZBQ1_HUMAN Isoform of Q9H944, Mediator of RNA polymerase II transcription subunit 20 (Fragment) OS=Homo sapiens OX=9606 GN=MED20 PE=1 SV=8;tr|A6PVP4|A6PVP4_HUMAN Isoform of Q9H944, Mediator of RNA polymerase II transcription subunit 20 (Fragmen	5	1	1	1	18.3	18.3	18.3	6.7086	60	60;140;145;123;212	0.006875	6.3342	NaN	NaN	NaN	1	0	Median	204220	119050	85175	SVQQTVELLTR				216	7634	TRUE	8213	11724	17835	17835			9606;9606;9606;9606;9606
SRRM4	Serine/arginine repetitive matrix protein 4	NaN	A7MD48	A7MD48	1	1	1	sp|A7MD48|SRRM4_HUMAN Serine/arginine repetitive matrix protein 4 OS=Homo sapiens OX=9606 GN=SRRM4 PE=1 SV=2	1	1	1	1	2	2	2	68.558	611	611	1	-2	NaN	NaN	NaN	1	1	Median	782680	708250	74427	GAMLENLSPTSR	+			218	2827	TRUE	3009	4262	6550	6550	151	345	9606
HSPA8		NaN	A8K7Q2	A8K7Q2	12	1	1	tr|A8K7Q2|A8K7Q2_HUMAN Isoform of P11142, Heat shock cognate 71 kDa protein OS=Homo sapiens OX=9606 GN=HSPA8 PE=1 SV=1	1	12	1	1	25.1	2.2	2.2	45.338	410	410	1	-2	NaN	NaN	NaN	1	1	Median	2642200	1246600	1395600	ARFEELNADLFR;DNNLLGK;FEELNADLFR;FELTGIPPAPR;GTLDPVEK;LLQDFFNGK;MVNHFIAEFK;MVQEAEK;NQTAEKEEFEHQQK;NSLESYAFNMK;SQIHDIVLVGGSTR;VNHFIAEFK	+			219	744;1342;2498;2508;3315;5136;5976;5978;6325;6350;7450;8895	False;False;False;False;False;False;False;False;False;False;False;True	790;1435;2657;2668;3517;5445;6438;6439;6443;6820;6849;6850;8023;9554	1113;2045;2046;3778;3779;3780;3800;3801;5001;7792;7793;9127;9128;9129;9130;9131;9132;9140;9742;9743;9744;9789;9790;9791;9792;11459;11460;11461;11462;13721	1668;1669;3091;3092;3093;5805;5806;5807;5808;5809;5810;5811;5839;5840;7678;11882;11883;11884;11885;13851;13852;13853;13854;13855;13856;13857;13858;13877;13878;13879;14830;14831;14832;14833;14906;14907;14908;14909;14910;14911;14912;14913;14914;17430;17431;17432;17433;17434;17435;20945	1668;3091;5811;5839;7678;11883;13858;13878;14833;14909;17433;20945	152;153	1;313	9606
CECR5	Cat eye syndrome critical region protein 5	NaN	A8MYZ9;Q9BXW7-2;Q9BXW7	A8MYZ9;Q9BXW7-2;Q9BXW7	1;1;1	1;1;1	1;1;1	tr|A8MYZ9|A8MYZ9_HUMAN Isoform of Q9BXW7, Haloacid dehalogenase-like hydrolase domain-containing 5 OS=Homo sapiens OX=9606 GN=HDHD5 PE=1 SV=1;sp|Q9BXW7-2|HDHD5-2_HUMAN Isoform of Q9BXW7, Isoform 1 of Haloacid dehalogenase-like hydrolase domain-containing 5	3	1	1	1	5.4	5.4	5.4	23.831	223	223;393;423	0.0079559	6.206	NaN	NaN	NaN	0	0	Median	0	0	0	IEGVLLLGEPVR				223	3725	TRUE	3945	5615	8631	8631			9606;9606;9606
NRD1	Nardilysin	NaN	F5H7V1;B1AKJ5;O43847;O43847-2;G3V1R5	F5H7V1;B1AKJ5;O43847;O43847-2;G3V1R5	2;2;2;2;1	2;2;2;2;1	2;2;2;2;1	tr|F5H7V1|F5H7V1_HUMAN Isoform of O43847, Nardilysin OS=Homo sapiens OX=9606 GN=NRDC PE=1 SV=2;tr|B1AKJ5|B1AKJ5_HUMAN Isoform of O43847, Nardilysin OS=Homo sapiens OX=9606 GN=NRDC PE=1 SV=1;sp|O43847|NRDC_HUMAN Nardilysin OS=Homo sapiens OX=9606 GN=NRDC PE	5	2	2	2	2.5	2.5	2.5	108.71	949	949;1219;1151;1219;1087	0	14.137	NaN	NaN	NaN	1	0	Median	334000	210300	123700	EVEAVDSEYQLAR;LGADESEEEGR				231	2349;4817	True;True	2497;5114	3574;7305	5499;11168;11169	5499;11169			9606;9606;9606;9606;9606
SAE1	SUMO-activating enzyme subunit 1;SUMO-activating enzyme subunit 1, N-terminally processed	NaN	M0QYM8;M0R054;M0QX65;B3KNJ4;Q9UBE0-2;Q9UBE0-3;Q9UBE0	M0QYM8;M0R054;M0QX65;B3KNJ4;Q9UBE0-2;Q9UBE0-3;Q9UBE0	1;1;1;1;1;1;1	1;1;1;1;1;1;1	1;1;1;1;1;1;1	tr|M0QYM8|M0QYM8_HUMAN Isoform of Q9UBE0, SUMO-activating enzyme subunit 1 (Fragment) OS=Homo sapiens OX=9606 GN=SAE1 PE=1 SV=1;tr|M0R054|M0R054_HUMAN Isoform of Q9UBE0, SUMO-activating enzyme subunit 1 (Fragment) OS=Homo sapiens OX=9606 GN=SAE1 PE=1 SV=1;	7	1	1	1	9	9	9	14.899	133	133;157;205;299;266;299;346	0.0014599	8.2233	NaN	NaN	NaN	1	0	Median	337940	205120	132820	VSQGVEDGPDTK				238	9036	TRUE	9702	13913	21233;21234	21233			9606;9606;9606;9606;9606;9606;9606
VWA9	von Willebrand factor A domain-containing protein 9	NaN	H3BRY6;B4DVT3;B4DJL6;Q96SY0-4;Q96SY0-3;Q96SY0	H3BRY6;B4DVT3;B4DJL6;Q96SY0-4;Q96SY0-3;Q96SY0	1;1;1;1;1;1	1;1;1;1;1;1	1;1;1;1;1;1	tr|H3BRY6|H3BRY6_HUMAN Isoform of Q96SY0, Integrator complex subunit 14 OS=Homo sapiens OX=9606 GN=INTS14 PE=1 SV=1;tr|B4DVT3|B4DVT3_HUMAN Isoform of Q96SY0, Integrator complex subunit 14 OS=Homo sapiens OX=9606 GN=INTS14 PE=1 SV=1;tr|B4DJL6|B4DJL6_HUMAN I	6	1	1	1	2.1	2.1	2.1	51.583	468	468;482;554;439;461;518	0.0033003	6.6554	NaN	NaN	NaN	1	0	Median	144550	75942	68609	HLVLPIALNK				242	3529	TRUE	3740	5329	8170	8170			9606;9606;9606;9606;9606;9606
MRPL12	39S ribosomal protein L12, mitochondrial	NaN	B4DLN1;P52815	B4DLN1;P52815	1;1	1;1	1;1	tr|B4DLN1|B4DLN1_HUMAN cDNA FLJ60124, highly similar to Mitochondrial dicarboxylate carrier OS=Homo sapiens OX=9606 PE=2 SV=1;sp|P52815|RM12_HUMAN 39S ribosomal protein L12, mitochondrial OS=Homo sapiens OX=9606 GN=MRPL12 PE=1 SV=2	2	1	1	1	2.7	2.7	2.7	48.099	442	442;198	0.002059	7.0137	NaN	NaN	NaN	1	0	Median	338720	188510	150210	NYIQGINLVQAK				244	6433	TRUE	6941	9920	15111	15111			9606;9606
NQO1	NAD(P)H dehydrogenase [quinone] 1	NaN	B4DLR8;H3BNV2;H3BRK3;P15559-3;P15559-2;P15559	B4DLR8;H3BNV2;H3BRK3;P15559-3;P15559-2;P15559	1;1;1;1;1;1	1;1;1;1;1;1	1;1;1;1;1;1	tr|B4DLR8|B4DLR8_HUMAN Isoform of P15559, NAD(P)H dehydrogenase [quinone] 1 OS=Homo sapiens OX=9606 GN=NQO1 PE=1 SV=1;tr|H3BNV2|H3BNV2_HUMAN Isoform of P15559, NAD(P)H dehydrogenase [quinone] 1 OS=Homo sapiens OX=9606 GN=NQO1 PE=1 SV=1;tr|H3BRK3|H3BRK3_HUM	6	1	1	1	6.4	6.4	6.4	22.793	202	202;253;269;236;240;274	0.0014337	7.6367	NaN	NaN	NaN	1	0	Median	458340	306460	151880	EGHLSPDIVAEQK				245	1837	TRUE	1963	2809	4290	4290			9606;9606;9606;9606;9606;9606
CWC22	Pre-mRNA-splicing factor CWC22 homolog	NaN	B7WP74;Q9HCG8	B7WP74;Q9HCG8	1;1	1;1	1;1	tr|B7WP74|B7WP74_HUMAN Isoform of Q9HCG8, Pre-mRNA-splicing factor CWC22 homolog (Fragment) OS=Homo sapiens OX=9606 GN=CWC22 PE=1 SV=1;sp|Q9HCG8|CWC22_HUMAN Pre-mRNA-splicing factor CWC22 homolog OS=Homo sapiens OX=9606 GN=CWC22 PE=1 SV=3	2	1	1	1	1.5	1.5	1.5	85.576	745	745;908	0.008	6.2524	NaN	NaN	NaN	1	0	Median	416060	237880	178180	LSEETTTSSSR				256	5429	TRUE	5759	8212	12506;12507;12508	12508			9606;9606
ARMC8	Armadillo repeat-containing protein 8	NaN	C9J8P8;C9JAA7;C9JBY2;G5E9V7;G5E9V6;B7Z637;Q8IUR7-6;Q8IUR7-8;Q8IUR7-3;Q8IUR7-7;Q8IUR7-2;Q8IUR7	C9J8P8;C9JAA7;C9JBY2;G5E9V7;G5E9V6;B7Z637;Q8IUR7-6;Q8IUR7-8;Q8IUR7-3;Q8IUR7-7;Q8IUR7-2;Q8IUR7	1;1;1;1;1;1;1;1;1;1;1;1	1;1;1;1;1;1;1;1;1;1;1;1	1;1;1;1;1;1;1;1;1;1;1;1	tr|C9J8P8|C9J8P8_HUMAN Isoform of Q8IUR7, Armadillo repeat-containing protein 8 (Fragment) OS=Homo sapiens OX=9606 GN=ARMC8 PE=1 SV=1;tr|C9JAA7|C9JAA7_HUMAN Isoform of Q8IUR7, Armadillo repeat-containing protein 8 (Fragment) OS=Homo sapiens OX=9606 GN=ARMC	12	1	1	1	8.5	8.5	8.5	14.394	130	130;198;227;357;399;600;385;606;631;642;659;673	0.0080346	6.2762	NaN	NaN	NaN	1	0	Median	297970	174600	123380	ANLIVLGAVPR				257	637	TRUE	680	947	1425	1425			9606;9606;9606;9606;9606;9606;9606;9606;9606;9606;9606;9606
AGPS	Alkyldihydroxyacetonephosphate synthase, peroxisomal	NaN	B8ZZ81;O00116	B8ZZ81;O00116	1;1	1;1	1;1	tr|B8ZZ81|B8ZZ81_HUMAN Isoform of O00116, Alkylglycerone-phosphate synthase OS=Homo sapiens OX=9606 GN=AGPS PE=1 SV=1;sp|O00116|ADAS_HUMAN Alkyldihydroxyacetonephosphate synthase, peroxisomal OS=Homo sapiens OX=9606 GN=AGPS PE=1 SV=1	2	1	1	1	12.2	12.2	12.2	20.214	189	189;658	0.0079657	6.2165	NaN	NaN	NaN	1	0	Median	364570	239900	124670	AASAATAAPTATPAAQESGTIPK				264	110	TRUE	118	144	223;224	223			9606;9606
HSPE1;HSPE1-MOB4	10 kDa heat shock protein, mitochondrial	NaN	B8ZZL8;S4R3N1;P61604	B8ZZL8;S4R3N1;P61604	1;1;1	1;1;1	1;1;1	tr|B8ZZL8|B8ZZL8_HUMAN Isoform of P61604, 10 kDa heat shock protein, mitochondrial OS=Homo sapiens OX=9606 GN=HSPE1 PE=1 SV=1;tr|S4R3N1|S4R3N1_HUMAN HSPE1-MOB4 readthrough OS=Homo sapiens OX=9606 GN=HSPE1-MOB4 PE=3 SV=1;sp|P61604|CH10_HUMAN 10 kDa heat sho	3	1	1	1	13.9	13.9	13.9	10.689	101	101;261;102	0.0033289	6.7092	NaN	NaN	NaN	1	0	Median	790760	639580	151180	VLQATVVAVGSGSK				265	8812	TRUE	9459	13593	20723;20724	20723			9606;9606;9606
SMYD5	SET and MYND domain-containing protein 5	NaN	E2QRN5;F8WEJ9;C9IYN9;Q6GMV2	E2QRN5;F8WEJ9;C9IYN9;Q6GMV2	1;1;1;1	1;1;1;1	1;1;1;1	tr|E2QRN5|E2QRN5_HUMAN Isoform of Q6GMV2, SET and MYND domain-containing protein 5 OS=Homo sapiens OX=9606 GN=SMYD5 PE=1 SV=1;tr|F8WEJ9|F8WEJ9_HUMAN Isoform of Q6GMV2, SET and MYND domain-containing protein 5 OS=Homo sapiens OX=9606 GN=SMYD5 PE=1 SV=1;tr|C	4	1	1	1	12.9	12.9	12.9	7.771	70	70;81;138;418	0.0080695	6.3017	NaN	NaN	NaN	1	0	Median	351130	223520	127610	GLFATQLIR				274	3107	TRUE	3301	4679	7183;7184	7183			9606;9606;9606;9606
ARF5;ARF3;ARF1	ADP-ribosylation factor 3;ADP-ribosylation factor 5;ADP-ribosylation factor 1	NaN	C9J1Z8;F5H423;P61204-2;P84085;P84077;P61204	C9J1Z8;F5H423;P61204-2;P84085;P84077;P61204	2;2;2;2;2;2	1;1;1;1;1;1	1;1;1;1;1;1	tr|C9J1Z8|C9J1Z8_HUMAN Isoform of P84085, ADP-ribosylation factor 5 (Fragment) OS=Homo sapiens OX=9606 GN=ARF5 PE=1 SV=1;tr|F5H423|F5H423_HUMAN Uncharacterized protein OS=Homo sapiens OX=9606 PE=3 SV=1;sp|P61204-2|ARF3-2_HUMAN Isoform of P61204, Isoform 2	6	2	1	1	14	6.7	6.7	17.107	150	150;210;144;180;181;181	0.0020175	6.786	NaN	NaN	NaN	1	0	Median	1056300	765030	291280	DAVLLVFANK;ILMVGLDAAGK				279	1079;3960	True;False	1151;4191	1647;5988	2494;9201;9202	2494;9201			9606;9606;9606;9606;9606;9606
CBWD1;CBWD2	COBW domain-containing protein 1;COBW domain-containing protein 2	NaN	F2Z2T4;C9J3G2;Q9BRT8-2;Q9BRT8-3;Q9BRT8;Q8IUF1	F2Z2T4;C9J3G2;Q9BRT8-2;Q9BRT8-3;Q9BRT8;Q8IUF1	1;1;1;1;1;1	1;1;1;1;1;1	1;1;1;1;1;1	tr|F2Z2T4|F2Z2T4_HUMAN Isoform of Q9BRT8, COBW domain-containing protein 1 OS=Homo sapiens OX=9606 GN=CBWD1 PE=1 SV=1;tr|C9J3G2|C9J3G2_HUMAN Isoform of Q8IUF1, COBW domain-containing protein 2 OS=Homo sapiens OX=9606 GN=CBWD2 PE=1 SV=2;sp|Q9BRT8-2|CBWD1-2_	6	1	1	1	4.8	4.8	4.8	27.482	250	250;376;359;376;395;395	0.0044501	6.4333	NaN	NaN	NaN	1	0	Median	311840	176620	135220	QVALADAILINK				282	6807	TRUE	7334	10475	15949;15950;15951	15951			9606;9606;9606;9606;9606;9606
EIF5A2;EIF5A;EIF5AL1	Eukaryotic translation initiation factor 5A;Eukaryotic translation initiation factor 5A-2;Eukaryotic translation initiation factor 5A-1-like;Eukaryotic translation initiation factor 5A-1	NaN	F8WCJ1;C9J7B5;C9J4W5;I3L397;I3L504;Q9GZV4;Q6IS14;P63241;P63241-2	F8WCJ1;C9J7B5;C9J4W5;I3L397;I3L504;Q9GZV4;Q6IS14;P63241;P63241-2	1;1;1;1;1;1;1;1;1	1;1;1;1;1;1;1;1;1	1;1;1;1;1;1;1;1;1	tr|F8WCJ1|F8WCJ1_HUMAN Isoform of Q9GZV4, Eukaryotic translation initiation factor 5A OS=Homo sapiens OX=9606 GN=EIF5A2 PE=1 SV=1;tr|C9J7B5|C9J7B5_HUMAN Isoform of Q9GZV4, Eukaryotic translation initiation factor 5A OS=Homo sapiens OX=9606 GN=EIF5A2 PE=1 S	9	1	1	1	11.4	11.4	11.4	11.687	105	105;109;115;146;186;153;154;154;184	0.0085366	6.1826	NaN	NaN	NaN	1	0	Median	358120	237260	120860	VHLVGIDIFTGK				284	8626	TRUE	9265	13305	20298;20299	20298			9606;9606;9606;9606;9606;9606;9606;9606;9606
COX17	Cytochrome c oxidase copper chaperone	NaN	C9J8T6;Q14061	C9J8T6;Q14061	1;1	1;1	1;1	tr|C9J8T6|C9J8T6_HUMAN Isoform of Q14061, Cytochrome c oxidase copper chaperone OS=Homo sapiens OX=9606 GN=COX17 PE=1 SV=1;sp|Q14061|COX17_HUMAN Cytochrome c oxidase copper chaperone OS=Homo sapiens OX=9606 GN=COX17 PE=1 SV=2	2	1	1	1	16.3	16.3	16.3	10.853	98	98;63	0.0020422	6.8871	NaN	NaN	NaN	1	0	Median	879900	529300	350600	PGLVDSNPAPPESQEK				289	6488	TRUE	6997	10004	15257	15257			9606;9606
TBC1D15	TBC1 domain family member 15	NaN	C9JA93;Q8TC07-2;Q8TC07-3;Q8TC07	C9JA93;Q8TC07-2;Q8TC07-3;Q8TC07	1;1;1;1	1;1;1;1	1;1;1;1	tr|C9JA93|C9JA93_HUMAN Isoform of Q8TC07, TBC1 domain family member 15 (Fragment) OS=Homo sapiens OX=9606 GN=TBC1D15 PE=1 SV=1;sp|Q8TC07-2|TBC15-2_HUMAN Isoform of Q8TC07, Isoform 2 of TBC1 domain family member 15 OS=Homo sapiens OX=9606 GN=TBC1D15 PE=1 SV	4	1	1	1	4	4	4	32.136	278	278;674;682;691	0.0080396	6.2767	NaN	NaN	NaN	1	0	Median	588040	355890	232140	IDLGERPVVQR				291	3676	TRUE	3895	5543	8509	8509			9606;9606;9606;9606
RBBP7		NaN	C9JAJ9	C9JAJ9	1	1	1	tr|C9JAJ9|C9JAJ9_HUMAN Isoform of Q16576, Histone-binding protein RBBP7 (Fragment) OS=Homo sapiens OX=9606 GN=RBBP7 PE=1 SV=1	1	1	1	1	27	27	27	4.5342	37	37	0.0020107	6.7568	NaN	NaN	NaN	1	0	Median	1115100	697000	418060	AMFEDTVEER				292	607	TRUE	645	897	1349	1349	190	3	9606
HIGD1A	HIG1 domain family member 1A, mitochondrial	NaN	C9JAW5;C9JNU6;Q9Y241	C9JAW5;C9JNU6;Q9Y241	1;1;1	1;1;1	1;1;1	tr|C9JAW5|C9JAW5_HUMAN Isoform of A0A3B3IRZ5, Uncharacterized protein OS=Homo sapiens OX=9606 PE=4 SV=1;tr|C9JNU6|C9JNU6_HUMAN Isoform of Q9Y241, HIG1 domain family member 1A, mitochondrial OS=Homo sapiens OX=9606 GN=HIGD1A PE=4 SV=1;sp|Q9Y241|HIG1A_HUMAN	3	1	1	1	21.7	21.7	21.7	8.8131	83	83;96;93	0.00074184	10.291	NaN	NaN	NaN	1	0	Median	602160	318680	283490	STDTGVSLPSYEEDQGSK				293	7551	TRUE	8129	11611	17671;17672;17673	17673			9606;9606;9606
MTPN	Myotrophin	NaN	C9JL85;P58546	C9JL85;P58546	1;1	1;1	1;1	tr|C9JL85|C9JL85_HUMAN Isoform of P58546, Myotrophin OS=Homo sapiens OX=9606 GN=MTPN PE=1 SV=1;sp|P58546|MTPN_HUMAN Myotrophin OS=Homo sapiens OX=9606 GN=MTPN PE=1 SV=2	2	1	1	1	32.7	32.7	32.7	5.7044	52	52;118	0.0014695	9.0241	NaN	NaN	NaN	1	0	Median	1114700	750150	364530	GPDGLTAFEATDNQAIK				299	3194	TRUE	3391	4799	7366;7367;7368;7369	7366			9606;9606
POLR2H	DNA-directed RNA polymerases I, II, and III subunit RPABC3	NaN	C9JLU1;P52434-3;P52434;P52434-4	C9JLU1;P52434-3;P52434;P52434-4	1;1;1;1	1;1;1;1	1;1;1;1	tr|C9JLU1|C9JLU1_HUMAN Isoform of P52434, DNA-directed RNA polymerases I, II, and III subunit RPABC3 (Fragment) OS=Homo sapiens OX=9606 GN=POLR2H PE=1 SV=8;sp|P52434-3|RPAB3-3_HUMAN Isoform of P52434, Isoform 3 of DNA-directed RNA polymerases I, II, and II	4	1	1	1	7.4	7.4	7.4	16.925	148	148;114;150;175	0.0038735	6.5199	NaN	NaN	NaN	1	0	Median	882570	314380	568200	ADQFEYVMYGK				300	174	TRUE	184	239	361;362	362	194	92	9606;9606;9606;9606
THOC5	THO complex subunit 5 homolog	NaN	H7C441;C9JXG5;H7C072;F8WCP5;Q13769	H7C441;C9JXG5;H7C072;F8WCP5;Q13769	1;1;1;1;1	1;1;1;1;1	1;1;1;1;1	tr|H7C441|H7C441_HUMAN Isoform of Q13769, THO complex subunit 5 homolog (Fragment) OS=Homo sapiens OX=9606 GN=THOC5 PE=1 SV=2;tr|C9JXG5|C9JXG5_HUMAN Isoform of Q13769, THO complex subunit 5 homolog (Fragment) OS=Homo sapiens OX=9606 GN=THOC5 PE=1 SV=1;tr|H	5	1	1	1	8.5	8.5	8.5	20.803	176	176;223;262;343;683	0.0020848	7.1931	NaN	NaN	NaN	1	0	Median	596390	323500	272900	AEVTMGDPHQQTLAR				307	270	TRUE	287	386	577;578	577	197	159	9606;9606;9606;9606;9606
MT1M;MT1X;MT1G;MT1E;MT2A	Metallothionein-1M;Metallothionein-1X;Metallothionein-1G;Metallothionein-1E;Metallothionein-2	NaN	CON__P67983;Q8N339;P80297;P13640-2;P04732;P02795;P13640	CON__P67983;Q8N339;P80297;P13640-2;P04732;P02795;P13640	1;1;1;1;1;1;1	1;1;1;1;1;1;1	1;1;1;1;1;1;1	;sp|Q8N339|MT1M_HUMAN Metallothionein-1M OS=Homo sapiens OX=9606 GN=MT1M PE=3 SV=2;sp|P80297|MT1X_HUMAN Metallothionein-1X OS=Homo sapiens OX=9606 GN=MT1X PE=1 SV=1;sp|P13640-2|MT1G-2_HUMAN Isoform of P13640, Isoform 2 of Metallothionein-1G OS=Homo sapiens	7	1	1	1	19.7	19.7	19.7	5.9511	61	61;61;61;61;61;61;62	0.0014556	8.0797	NaN	NaN	NaN	1	0	Median	316370	234790	81573	SCCSCCPVGCAK			+	324	6994	TRUE	7531	10758	16363	16363			-1;9606;9606;9606;9606;9606;9606
KRT74;KRT73	Keratin, type II cytoskeletal 74;Keratin, type II cytoskeletal 73	NaN	CON__Q7RTS7;CON__Q32MB2;F8W1S1;Q7RTS7;Q86Y46	CON__Q7RTS7;CON__Q32MB2;F8W1S1;Q7RTS7;Q86Y46	4;4;4;4;4	1;1;1;1;1	0;0;0;0;0	;;tr|F8W1S1|F8W1S1_HUMAN Isoform of Q7RTS7, Keratin, type II cytoskeletal 74 OS=Homo sapiens OX=9606 GN=KRT74 PE=1 SV=1;sp|Q7RTS7|K2C74_HUMAN Keratin, type II cytoskeletal 74 OS=Homo sapiens OX=9606 GN=KRT74 PE=1 SV=2;sp|Q86Y46|K2C73_HUMAN Keratin, type II	5	4	1	0	5.3	2.3	0	57.865	529	529;540;543;529;540	0	15.083	NaN	NaN	NaN	1	1	Median	7447700	6660300	787450	FASFIDK;FLEQQNQVLETK;KLLEGEECR;LLEGEECR			+	326	2454;2591;4391;5050	False;True;False;False	2610;2757;4661;5359	3719;3720;3914;3915;3916;3917;3918;3919;3920;3921;3922;3923;6655;6656;6657;6658;7667;7668;7669	5707;5708;6012;6013;6014;6015;6016;6017;6018;6019;6020;6021;6022;6023;6024;10213;10214;10215;10216;11700;11701;11702	5707;6014;10213;11700			-1;-1;9606;9606;9606
		NaN	CON__Q3ZBS7	CON__Q3ZBS7	1	1	1		1	1	1	1	2.5	2.5	2.5	54.099	484	484	0.0079462	6.2008	NaN	NaN	NaN	0	0	Median	0	0	0	FQDGVLEPDFPR			+	327	2678	TRUE	2855	4050	6225	6225			-1
		NaN	CON__Q8VED5	CON__Q8VED5	8	1	0		1	8	1	0	10.9	1.9	0	57.552	531	531	0.0080796	6.3085	NaN	NaN	NaN	1	0	Median	3992600	1831000	2161600	AEAESWYQTK;FASFIDK;FLEQQNK;NKYEDEINKR;NLDLDSIIAEVK;SRAEAESWYQTK;YEDEINKR;YEELQVTAGK			+	330	198;2454;2590;6164;6178;7474;9324;9333	False;False;False;False;False;False;False;True	209;2610;2756;6639;6655;8050;10006;10015	278;3719;3720;3910;3911;3912;3913;9449;9450;9451;9452;9453;9454;9455;9456;9474;9475;9476;9477;11510;14348;14373	415;5707;5708;6008;6009;6010;6011;14370;14371;14372;14373;14374;14375;14376;14377;14412;14413;14414;14415;17502;21904;21938	415;5707;6010;14377;14414;17502;21904;21938			-1
HMGB2	High mobility group protein B2	NaN	D6R9A6;P26583	D6R9A6;P26583	1;1	1;1	1;1	tr|D6R9A6|D6R9A6_HUMAN Isoform of P26583, High mobility group protein B2 (Fragment) OS=Homo sapiens OX=9606 GN=HMGB2 PE=1 SV=1;sp|P26583|HMGB2_HUMAN High mobility group protein B2 OS=Homo sapiens OX=9606 GN=HMGB2 PE=1 SV=2	2	1	1	1	9.7	9.7	9.7	15.404	134	134;209	0.0014782	9.4903	NaN	NaN	NaN	1	0	Median	358570	255730	102840	SEHPGLSIGDTAK				336	7071	TRUE	7612	10860	16523	16523			9606;9606
ARHGAP22		NaN	D6RBJ8;Q7Z5H3-5	D6RBJ8;Q7Z5H3-5	1;1	1;1	1;1	tr|D6RBJ8|D6RBJ8_HUMAN Isoform of Q7Z5H3, Rho GTPase-activating protein 22 OS=Homo sapiens OX=9606 GN=ARHGAP22 PE=1 SV=1;sp|Q7Z5H3-5|RHG22-5_HUMAN Isoform of Q7Z5H3, Isoform 5 of Rho GTPase-activating protein 22 OS=Homo sapiens OX=9606 GN=ARHGAP22 PE=1 SV=	2	1	1	1	3.8	3.8	3.8	29.824	261	261;704	0.0038585	6.5032	NaN	NaN	NaN	0	0	Median	0	0	0	MLPTASSKRR				341	5874	TRUE	6296	8945	13611	13611	215	1	9606;9606
ANXA5	Annexin;Annexin A5	NaN	E9PHT9;D6RBL5;P08758	E9PHT9;D6RBL5;P08758	1;1;1	1;1;1	1;1;1	tr|E9PHT9|E9PHT9_HUMAN Isoform of P08758, Annexin OS=Homo sapiens OX=9606 GN=ANXA5 PE=1 SV=1;tr|D6RBL5|D6RBL5_HUMAN Isoform of P08758, Annexin OS=Homo sapiens OX=9606 GN=ANXA5 PE=1 SV=1;sp|P08758|ANXA5_HUMAN Annexin A5 OS=Homo sapiens OX=9606 GN=ANXA5 PE=1	3	1	1	1	5.5	5.5	5.5	18.224	163	163;260;320	0.0062696	6.3457	NaN	NaN	NaN	1	0	Median	803030	643570	159460	VLTEIIASR				342	8837	TRUE	9487	13631	20783	20783			9606;9606;9606
SEC31A	Protein transport protein Sec31A	NaN	D6RHZ5;H7BXG7;D6REX3;O94979-5;O94979-7;O94979-6;O94979-3;O94979-10;O94979-4;O94979-9;O94979-2;O94979;O94979-8	D6RHZ5;H7BXG7;D6REX3;O94979-5;O94979-7;O94979-6;O94979-3;O94979-10;O94979-4;O94979-9;O94979-2;O94979;O94979-8	1;1;1;1;1;1;1;1;1;1;1;1;1	1;1;1;1;1;1;1;1;1;1;1;1;1	1;1;1;1;1;1;1;1;1;1;1;1;1	tr|D6RHZ5|D6RHZ5_HUMAN Isoform of O94979, Protein transport protein Sec31A OS=Homo sapiens OX=9606 GN=SEC31A PE=1 SV=1;tr|H7BXG7|H7BXG7_HUMAN Isoform of O94979, Protein transport protein Sec31A OS=Homo sapiens OX=9606 GN=SEC31A PE=1 SV=1;tr|D6REX3|D6REX3_H	13	1	1	1	1.5	1.5	1.5	96.502	877	877;969;1251;509;969;1067;1106;1166;1181;1200;1205;1220;1233	0.0020819	7.176	NaN	NaN	NaN	1	0	Median	432380	236870	195510	NPAVLSAASFDGR				347	6282	TRUE	6773	9660	14687	14687			9606;9606;9606;9606;9606;9606;9606;9606;9606;9606;9606;9606;9606
UBE2V2;UBE2V1;TMEM189-UBE2V1	Ubiquitin-conjugating enzyme E2 variant 1;Ubiquitin-conjugating enzyme E2 variant 2	NaN	E5RIF1;D6RG00;H0YBX6;I3L0A0;Q13404-8;Q15819;Q13404;Q13404-7;Q13404-2;Q13404-1	E5RIF1;D6RG00;H0YBX6;I3L0A0;Q13404-8;Q15819;Q13404;Q13404-7;Q13404-2;Q13404-1	1;1;1;1;1;1;1;1;1;1	1;1;1;1;1;1;1;1;1;1	1;1;1;1;1;1;1;1;1;1	tr|E5RIF1|E5RIF1_HUMAN Isoform of Q15819, Ubiquitin-conjugating enzyme E2 variant 2 (Fragment) OS=Homo sapiens OX=9606 GN=UBE2V2 PE=4 SV=1;tr|D6RG00|D6RG00_HUMAN Isoform of Q13404, HCG2018358, isoform CRA_d OS=Homo sapiens OX=9606 GN=UBE2V1 PE=4 SV=2;tr|H0	10	1	1	1	19.2	19.2	19.2	5.7715	52	52;89;154;370;105;145;147;170;170;221	0.0032852	6.6466	NaN	NaN	NaN	1	0	Median	440180	339140	101040	LLEELEEGQK				348	5045	TRUE	5354	7659	11691	11691			9606;9606;9606;9606;9606;9606;9606;9606;9606;9606
CIRBP	Cold-inducible RNA-binding protein	NaN	K7ENX8;K7ELV6;K7EJV5;K7ELT6;K7EJV1;K7EMY9;K7EPM4;K7ER40;K7EQR7;D6W5Y5;Q14011;Q14011-2	K7ENX8;K7ELV6;K7EJV5;K7ELT6;K7EJV1;K7EMY9;K7EPM4;K7ER40;K7EQR7;D6W5Y5;Q14011;Q14011-2	1;1;1;1;1;1;1;1;1;1;1;1	1;1;1;1;1;1;1;1;1;1;1;1	1;1;1;1;1;1;1;1;1;1;1;1	tr|K7ENX8|K7ENX8_HUMAN Isoform of Q14011, Cold-inducible RNA-binding protein (Fragment) OS=Homo sapiens OX=9606 GN=CIRBP PE=1 SV=2;tr|K7ELV6|K7ELV6_HUMAN Isoform of Q14011, Cold-inducible RNA-binding protein (Fragment) OS=Homo sapiens OX=9606 GN=CIRBP PE=1	12	1	1	1	13.8	13.8	13.8	8.9138	80	80;89;105;135;148;159;168;173;202;297;172;263	0.0056926	6.3975	NaN	NaN	NaN	1	0	Median	541200	303000	238210	YGQISEVVVVK				353	9374	TRUE	10057	14442	22044	22044			9606;9606;9606;9606;9606;9606;9606;9606;9606;9606;9606;9606
FBXO16	F-box only protein 16	NaN	G3V0Z8;E5RIL5;J3KNU2;E5RFF8;Q8IX29-2;Q8IX29	G3V0Z8;E5RIL5;J3KNU2;E5RFF8;Q8IX29-2;Q8IX29	1;1;1;1;1;1	1;1;1;1;1;1	1;1;1;1;1;1	tr|G3V0Z8|G3V0Z8_HUMAN Isoform of Q8IX29, F-box only protein 16 OS=Homo sapiens OX=9606 GN=FBXO16 PE=4 SV=1;tr|E5RIL5|E5RIL5_HUMAN Isoform of Q8IX29, F-box only protein 16 (Fragment) OS=Homo sapiens OX=9606 GN=FBXO16 PE=4 SV=1;tr|J3KNU2|J3KNU2_HUMAN Isofor	6	1	1	1	18.8	18.8	18.8	7.9474	69	69;184;316;349;280;292	1	-2	NaN	NaN	NaN	0	0	Median	0	0	0	MAFAPPKNTDGPK	+			355	5714	TRUE	6059	8625	13128	13128	218	2	9606;9606;9606;9606;9606;9606
CNOT7	CCR4-NOT transcription complex subunit 7	NaN	E5RGH2;H0YAV9;Q9UIV1-2;Q9UIV1	E5RGH2;H0YAV9;Q9UIV1-2;Q9UIV1	1;1;1;1	1;1;1;1	1;1;1;1	tr|E5RGH2|E5RGH2_HUMAN Isoform of Q9UIV1, CCR4-NOT transcription complex subunit 7 (Fragment) OS=Homo sapiens OX=9606 GN=CNOT7 PE=1 SV=1;tr|H0YAV9|H0YAV9_HUMAN Isoform of Q9UIV1, CCR4-NOT transcription complex subunit 7 (Fragment) OS=Homo sapiens OX=9606 G	4	1	1	1	7.5	7.5	7.5	17.034	147	147;208;244;285	0.0014276	7.4963	NaN	NaN	NaN	1	0	Median	925370	471650	453720	SNADYQYQLLR				356	7361	TRUE	7925	11333	17213;17214;17215	17215			9606;9606;9606;9606
STMN2	Stathmin;Stathmin-2	NaN	E5RGX5;Q93045;Q93045-2	E5RGX5;Q93045;Q93045-2	1;1;1	1;1;1	1;1;1	tr|E5RGX5|E5RGX5_HUMAN Isoform of Q93045, Stathmin OS=Homo sapiens OX=9606 GN=STMN2 PE=1 SV=1;sp|Q93045|STMN2_HUMAN Stathmin-2 OS=Homo sapiens OX=9606 GN=STMN2 PE=1 SV=3;sp|Q93045-2|STMN2-2_HUMAN Isoform of Q93045, Isoform 2 of Stathmin-2 OS=Homo sapiens O	3	1	1	1	6	6	6	19.574	168	168;179;187	0.0020202	6.7923	NaN	NaN	NaN	1	0	Median	946830	785040	161780	ALEENNNFSK				358	486	TRUE	513	721	1086	1086			9606;9606;9606
MRPL15	39S ribosomal protein L15, mitochondrial	NaN	E5RHF4;E5RIZ4;Q9P015	E5RHF4;E5RIZ4;Q9P015	1;1;1	1;1;1	1;1;1	tr|E5RHF4|E5RHF4_HUMAN Isoform of Q9P015, 39S ribosomal protein L15, mitochondrial (Fragment) OS=Homo sapiens OX=9606 GN=MRPL15 PE=1 SV=1;tr|E5RIZ4|E5RIZ4_HUMAN Isoform of Q9P015, 39S ribosomal protein L15, mitochondrial (Fragment) OS=Homo sapiens OX=9606	3	1	1	1	4.5	4.5	4.5	21.943	198	198;237;296	0.0080846	6.3143	NaN	NaN	NaN	1	0	Median	509310	301480	207830	LQYLIDLGR				359	5408	TRUE	5738	8185	12471	12471			9606;9606;9606
TOP1MT	DNA topoisomerase I, mitochondrial	NaN	E5RIC7;Q969P6-2;Q969P6	E5RIC7;Q969P6-2;Q969P6	3;3;3	1;1;1	1;1;1	tr|E5RIC7|E5RIC7_HUMAN Isoform of Q969P6, DNA topoisomerase I (Fragment) OS=Homo sapiens OX=9606 GN=TOP1MT PE=1 SV=2;sp|Q969P6-2|TOP1M-2_HUMAN Isoform of Q969P6, Isoform 2 of DNA topoisomerase I, mitochondrial OS=Homo sapiens OX=9606 GN=TOP1MT PE=1 SV=1;sp	3	3	1	1	8	3.2	3.2	44.029	376	376;503;601	1	-2	NaN	NaN	NaN	0	0	Median	0	0	0	AVALYFIDK;HLQELMDGLTAK;NLQLFMENK	+			362	888;3519;6219	False;True;False	944;3729;6698	1319;5310;9527	1975;8147;14482	1975;8147;14482	220	293	9606;9606;9606
TTI2	TELO2-interacting protein 2	NaN	E5RIH5;Q6NXR4	E5RIH5;Q6NXR4	1;1	1;1	1;1	tr|E5RIH5|E5RIH5_HUMAN Isoform of Q6NXR4, TELO2-interacting protein 2 OS=Homo sapiens OX=9606 GN=TTI2 PE=1 SV=1;sp|Q6NXR4|TTI2_HUMAN TELO2-interacting protein 2 OS=Homo sapiens OX=9606 GN=TTI2 PE=1 SV=1	2	1	1	1	2.1	2.1	2.1	53.305	477	477;508	0.0033069	6.6692	NaN	NaN	NaN	1	0	Median	284160	171640	112520	AAQVGLLFLK				363	106	TRUE	114	140	217;218	217			9606;9606
NDRG1	Protein NDRG1	NaN	E5RJY1;E7ESM1;Q92597-3;Q92597-2;Q92597	E5RJY1;E7ESM1;Q92597-3;Q92597-2;Q92597	1;1;1;1;1	1;1;1;1;1	1;1;1;1;1	tr|E5RJY1|E5RJY1_HUMAN Isoform of Q92597, Protein NDRG1 OS=Homo sapiens OX=9606 GN=NDRG1 PE=1 SV=1;tr|E7ESM1|E7ESM1_HUMAN Isoform of Q92597, Protein NDRG1 OS=Homo sapiens OX=9606 GN=NDRG1 PE=1 SV=1;sp|Q92597-3|NDRG1-3_HUMAN Isoform of Q92597, Isoform 3 of	5	1	1	1	13.6	13.6	13.6	10.979	103	103;141;313;328;394	0.0044757	6.4605	NaN	NaN	NaN	1	0	Median	481180	370350	110830	TASGSSVTSLDGTR				366	7724	TRUE	8310	11882	18068	18068			9606;9606;9606;9606;9606
SQSTM1	Sequestosome-1	NaN	E9PFW8;E7EMC7;Q13501-2;Q13501	E9PFW8;E7EMC7;Q13501-2;Q13501	1;1;1;1	1;1;1;1	1;1;1;1	tr|E9PFW8|E9PFW8_HUMAN Isoform of Q13501, Sequestosome-1 (Fragment) OS=Homo sapiens OX=9606 GN=SQSTM1 PE=1 SV=1;tr|E7EMC7|E7EMC7_HUMAN Isoform of Q13501, Sequestosome-1 OS=Homo sapiens OX=9606 GN=SQSTM1 PE=1 SV=1;sp|Q13501-2|SQSTM-2_HUMAN Isoform of Q13501	4	1	1	1	12.6	12.6	12.6	18.379	167	167;378;356;440	0	12.588	NaN	NaN	NaN	1	0	Median	831600	271030	560570	PGPTAESASGPSEDPSVNFLK				369	6490	TRUE	6999	10006	15261;15262;15263	15263			9606;9606;9606;9606
MEN1	Menin	NaN	E7EN32;O00255-3;O00255-2;O00255	E7EN32;O00255-3;O00255-2;O00255	1;1;1;1	1;1;1;1	1;1;1;1	tr|E7EN32|E7EN32_HUMAN Isoform of O00255, Menin OS=Homo sapiens OX=9606 GN=MEN1 PE=1 SV=1;sp|O00255-3|MEN1-3_HUMAN Isoform of O00255, Isoform 3 of Menin OS=Homo sapiens OX=9606 GN=MEN1 PE=1 SV=4;sp|O00255-2|MEN1-2_HUMAN Isoform of O00255, Isoform 2 of Meni	4	1	1	1	2.5	2.5	2.5	61.418	555	555;575;610;615	0.0014164	7.4057	NaN	NaN	NaN	1	0	Median	264130	161890	102250	GLGTGQGAVSGPPR				370	3119	TRUE	3313	4693	7207	7207			9606;9606;9606;9606
FAM91A1	Protein FAM91A1	NaN	H0YBR6;E7ER68;Q658Y4	H0YBR6;E7ER68;Q658Y4	1;1;1	1;1;1	1;1;1	tr|H0YBR6|H0YBR6_HUMAN Isoform of Q658Y4, Protein FAM91A1 (Fragment) OS=Homo sapiens OX=9606 GN=FAM91A1 PE=1 SV=1;tr|E7ER68|E7ER68_HUMAN Isoform of Q658Y4, Protein FAM91A1 OS=Homo sapiens OX=9606 GN=FAM91A1 PE=1 SV=1;sp|Q658Y4|F91A1_HUMAN Protein FAM91A1 O	3	1	1	1	10.5	10.5	10.5	12.631	114	114;789;838	0.003886	6.5522	NaN	NaN	NaN	1	0	Median	332040	192800	139240	VQGDYFETLLYK				378	8971	TRUE	9634	13827	21103;21104	21104			9606;9606;9606
PTK2	Focal adhesion kinase 1	NaN	H0YB99;H0YBP1;E7ESA6;Q05397-4;Q05397-3;Q05397-2;Q05397-7;Q05397;Q05397-5	H0YB99;H0YBP1;E7ESA6;Q05397-4;Q05397-3;Q05397-2;Q05397-7;Q05397;Q05397-5	1;1;1;1;1;1;1;1;1	1;1;1;1;1;1;1;1;1	1;1;1;1;1;1;1;1;1	tr|H0YB99|H0YB99_HUMAN Isoform of Q05397, Focal adhesion kinase 1 (Fragment) OS=Homo sapiens OX=9606 GN=PTK2 PE=1 SV=1;tr|H0YBP1|H0YBP1_HUMAN Isoform of Q05397, Focal adhesion kinase 1 (Fragment) OS=Homo sapiens OX=9606 GN=PTK2 PE=1 SV=1;tr|E7ESA6|E7ESA6_H	9	1	1	1	3.1	3.1	3.1	35.844	319	319;1017;1096;431;554;879;1006;1052;1065	0.0020067	6.7378	NaN	NaN	NaN	1	0	Median	218250	155330	62918	FFEILSPVYR				381	2523	TRUE	2683	3820	5871;5872	5871			9606;9606;9606;9606;9606;9606;9606;9606;9606
CYFIP2	Cytoplasmic FMR1-interacting protein 2	NaN	H7C229;E7EVJ5;Q96F07-2;E7EW33;Q96F07	H7C229;E7EVJ5;Q96F07-2;E7EW33;Q96F07	7;7;7;6;6	1;1;1;1;1	1;1;1;1;1	tr|H7C229|H7C229_HUMAN Isoform of Q96F07, Cytoplasmic FMR1-interacting protein 2 OS=Homo sapiens OX=9606 GN=CYFIP2 PE=1 SV=2;tr|E7EVJ5|E7EVJ5_HUMAN Isoform of Q96F07, Cytoplasmic FMR1-interacting protein OS=Homo sapiens OX=9606 GN=CYFIP2 PE=1 SV=1;sp|Q96F0	5	7	1	1	7.5	1.4	1.4	129.7	1117	1117;1227;1253;1057;1278	1	-2	NaN	NaN	NaN	1	0	Median	237910	126730	111180	AVGPSSTQLYMVR;EANHNVSAPYGR;LADQIFAYYK;SLLQGTILQYVK;TMLESLIADK;TVEVLEPEVTK;YSNSEVVTGSGLDSQK	+			387	921;1622;4504;7310;8057;8259;9529	False;False;False;False;False;False;True	980;981;1733;4781;7866;8664;8876;10225	1375;1376;2459;6836;11251;12413;12722;14681	2062;2063;2064;3745;10463;17086;18892;19355;22416	2062;3745;10463;17086;18892;19355;22416	236	424	9606;9606;9606;9606;9606
HERC5	E3 ISG15--protein ligase HERC5	NaN	E9PBL0;Q9UII4	E9PBL0;Q9UII4	1;1	1;1	1;1	tr|E9PBL0|E9PBL0_HUMAN Isoform of Q9UII4, E3 ISG15--protein ligase HERC5 OS=Homo sapiens OX=9606 GN=HERC5 PE=1 SV=1;sp|Q9UII4|HERC5_HUMAN E3 ISG15--protein ligase HERC5 OS=Homo sapiens OX=9606 GN=HERC5 PE=1 SV=2	2	1	1	1	1.5	1.5	1.5	77.869	662	662;1024	0.0056711	6.3731	NaN	NaN	NaN	1	0	Median	329680	163230	166450	FLVFLTGTDR				395	2630	TRUE	2799	3980	6107;6108	6108			9606;9606
ANKHD1;ANKRD17	Ankyrin repeat domain-containing protein 17;Ankyrin repeat and KH domain-containing protein 1	NaN	H7C2F5;H3BLS9;H0YLQ3;E9PDP5;H0YM23;O75179-6;O75179-7;Q8IWZ3;Q8IWZ3-4;O75179-2;O75179;Q8IWZ3-6	H7C2F5;H3BLS9;H0YLQ3;E9PDP5;H0YM23;O75179-6;O75179-7;Q8IWZ3;Q8IWZ3-4;O75179-2;O75179;Q8IWZ3-6	1;1;1;1;1;1;1;1;1;1;1;1	1;1;1;1;1;1;1;1;1;1;1;1	1;1;1;1;1;1;1;1;1;1;1;1	tr|H7C2F5|H7C2F5_HUMAN Isoform of Q8IWZ3, Ankyrin repeat and KH domain-containing protein 1 (Fragment) OS=Homo sapiens OX=9606 GN=ANKHD1 PE=1 SV=1;tr|H3BLS9|H3BLS9_HUMAN Isoform of Q8IWZ3, Ankyrin repeat and KH domain-containing protein 1 (Fragment) OS=Hom	12	1	1	1	2.1	2.1	2.1	64.914	608	608;687;862;1565;2487;2352;2490;2542;2544;2602;2603;2617	0.0020027	6.7279	NaN	NaN	NaN	1	0	Median	251400	180660	70741	GADVNAPPVPSSR				402	2804	TRUE	2984	4225	6481	6481			9606;9606;9606;9606;9606;9606;9606;9606;9606;9606;9606;9606
ACADS	Short-chain specific acyl-CoA dehydrogenase, mitochondrial	NaN	E9PE82;P16219	E9PE82;P16219	1;1	1;1	1;1	tr|E9PE82|E9PE82_HUMAN Isoform of P16219, Short-chain-specific acyl-CoA dehydrogenase, mitochondrial OS=Homo sapiens OX=9606 GN=ACADS PE=1 SV=1;sp|P16219|ACADS_HUMAN Short-chain specific acyl-CoA dehydrogenase, mitochondrial OS=Homo sapiens OX=9606 GN=ACAD	2	1	1	1	2.5	2.5	2.5	44.012	408	408;412	1	-2	NaN	NaN	NaN	0	0	Median	0	0	0	IAMQTLDMGR	+			403	3624	TRUE	3838	5468	8397	8397	251;252	261;266	9606;9606
DNAAF5	Dynein assembly factor 5, axonemal	NaN	E9PGY2;H0Y650;Q86Y56-3;Q86Y56	E9PGY2;H0Y650;Q86Y56-3;Q86Y56	1;1;1;1	1;1;1;1	1;1;1;1	tr|E9PGY2|E9PGY2_HUMAN Isoform of Q86Y56, Dynein assembly factor 5, axonemal OS=Homo sapiens OX=9606 GN=DNAAF5 PE=1 SV=1;tr|H0Y650|H0Y650_HUMAN Isoform of Q86Y56, Dynein assembly factor 5, axonemal (Fragment) OS=Homo sapiens OX=9606 GN=DNAAF5 PE=1 SV=1;sp|	4	1	1	1	3.9	3.9	3.9	30.973	280	280;657;235;855	0.0068707	6.3342	NaN	NaN	NaN	1	0	Median	261790	180030	81757	AIQDAILEVLK				410	420	TRUE	441	614	929	929			9606;9606;9606;9606
SDC1	Syndecan-1	NaN	E9PHH3;H7C1K4;P18827	E9PHH3;H7C1K4;P18827	1;1;1	1;1;1	1;1;1	tr|E9PHH3|E9PHH3_HUMAN Isoform of P18827, Syndecan-1 OS=Homo sapiens OX=9606 GN=SDC1 PE=1 SV=1;tr|H7C1K4|H7C1K4_HUMAN Isoform of P18827, Syndecan-1 (Fragment) OS=Homo sapiens OX=9606 GN=SDC1 PE=1 SV=1;sp|P18827|SDC1_HUMAN Syndecan-1 OS=Homo sapiens OX=9606	3	1	1	1	10.1	10.1	10.1	17.782	169	169;215;310	0.0014194	7.4178	NaN	NaN	NaN	1	0	Median	698820	325550	373270	EGEAVVLPEVEPGLTAR				412	1822	TRUE	1948	2790	4261;4262	4262			9606;9606;9606
NEDD8;NEDD8-MDP1	NEDD8	NaN	F8VSA6;E9PS38;S4R3E9;E9PL57;Q15843	F8VSA6;E9PS38;S4R3E9;E9PL57;Q15843	1;1;1;1;1	1;1;1;1;1	1;1;1;1;1	tr|F8VSA6|F8VSA6_HUMAN Isoform of Q15843, NEDD8 OS=Homo sapiens OX=9606 GN=NEDD8 PE=4 SV=1;tr|E9PS38|E9PS38_HUMAN Isoform of S4R3E9, NEDD8-MDP1 readthrough OS=Homo sapiens OX=9606 GN=NEDD8-MDP1 PE=4 SV=2;tr|S4R3E9|S4R3E9_HUMAN NEDD8-MDP1 readthrough OS=Hom	5	1	1	1	28	28	28	5.8668	50	50;67;84;170;81	0.0020121	6.7649	NaN	NaN	NaN	1	0	Median	977060	206250	770810	EIEIDIEPTDKVER				423	1919	TRUE	2048	2924	4476	4476			9606;9606;9606;9606;9606
CSTF3	Cleavage stimulation factor subunit 3	NaN	E9PLP8;Q12996;Q12996-2	E9PLP8;Q12996;Q12996-2	2;2;1	2;2;1	2;2;1	tr|E9PLP8|E9PLP8_HUMAN Isoform of Q12996, Cleavage stimulation factor subunit 3 OS=Homo sapiens OX=9606 GN=CSTF3 PE=1 SV=2;sp|Q12996|CSTF3_HUMAN Cleavage stimulation factor subunit 3 OS=Homo sapiens OX=9606 GN=CSTF3 PE=1 SV=1;sp|Q12996-2|CSTF3-2_HUMAN Isof	3	2	2	2	3.1	3.1	3.1	86.272	749	749;717;103	0	12.558	NaN	NaN	NaN	1	0	Median	437040	176320	260710	GVEAVGSYAENQR;LVAQFPSSGR				425	3344;5573	True;True	3548;5910	5045;8421	7743;12816	7743;12816			9606;9606;9606
CSDE1	Cold shock domain-containing protein E1	NaN	E9PLT0;O75534-2;O75534;O75534-3;O75534-4	E9PLT0;O75534-2;O75534;O75534-3;O75534-4	1;1;1;1;1	1;1;1;1;1	1;1;1;1;1	tr|E9PLT0|E9PLT0_HUMAN Isoform of O75534, Cold shock domain-containing protein E1 OS=Homo sapiens OX=9606 GN=CSDE1 PE=1 SV=1;sp|O75534-2|CSDE1-2_HUMAN Isoform of O75534, Isoform 2 of Cold shock domain-containing protein E1 OS=Homo sapiens OX=9606 GN=CSDE1	5	1	1	1	1.6	1.6	1.6	74.583	668	668;767;798;813;844	0.0056604	6.3588	NaN	NaN	NaN	1	0	Median	867550	567290	300260	NITLDDASAPR				426	6149	TRUE	6624	9418	14326;14327	14327			9606;9606;9606;9606;9606
VPS28	Vacuolar protein sorting-associated protein 28 homolog	NaN	E9PQR7;E9PM90;Q9UK41;Q9UK41-2	E9PQR7;E9PM90;Q9UK41;Q9UK41-2	1;1;1;1	1;1;1;1	1;1;1;1	tr|E9PQR7|E9PQR7_HUMAN Isoform of Q9UK41, Vacuolar protein sorting-associated protein 28 homolog (Fragment) OS=Homo sapiens OX=9606 GN=VPS28 PE=1 SV=1;tr|E9PM90|E9PM90_HUMAN Isoform of Q9UK41, Vacuolar protein sorting-associated protein 28 homolog (Fragmen	4	1	1	1	6.2	6.2	6.2	18.469	161	161;185;221;233	0.0033223	6.6896	NaN	NaN	NaN	1	1	Median	382240	158510	223730	AMDEIQPDLR				429	602	TRUE	639	889	1339	1339			9606;9606;9606;9606
ARHGEF12	Rho guanine nucleotide exchange factor 12	NaN	E9PMR6;Q9NZN5-2;Q9NZN5	E9PMR6;Q9NZN5-2;Q9NZN5	1;1;1	1;1;1	1;1;1	tr|E9PMR6|E9PMR6_HUMAN Isoform of Q9NZN5, Rho guanine nucleotide exchange factor 12 OS=Homo sapiens OX=9606 GN=ARHGEF12 PE=1 SV=1;sp|Q9NZN5-2|ARHGC-2_HUMAN Isoform of Q9NZN5, Isoform 2 of Rho guanine nucleotide exchange factor 12 OS=Homo sapiens OX=9606 GN	3	1	1	1	0.7	0.7	0.7	161.91	1441	1441;1525;1544	0.0044728	6.4493	NaN	NaN	NaN	1	0	Median	232680	138720	93963	YPLLLDNIAK				431	9498	TRUE	10193	14641	22355	22355			9606;9606;9606
PFDN4	Prefoldin subunit 4	NaN	E9PQY2;Q9NQP4	E9PQY2;Q9NQP4	1;1	1;1	1;1	tr|E9PQY2|E9PQY2_HUMAN Isoform of Q9NQP4, Prefoldin subunit 4 OS=Homo sapiens OX=9606 GN=PFDN4 PE=1 SV=1;sp|Q9NQP4|PFD4_HUMAN Prefoldin subunit 4 OS=Homo sapiens OX=9606 GN=PFDN4 PE=1 SV=1	2	1	1	1	11	11	11	15.598	136	136;134	0.0013986	7.2185	NaN	NaN	NaN	1	0	Median	273760	108610	165150	AAAEDVNVTFEDQQK				437	19	TRUE	21	29	42;43;44;45	42			9606;9606
FAU	40S ribosomal protein S30	NaN	E9PR30;P62861	E9PR30;P62861	1;1	1;1	1;1	tr|E9PR30|E9PR30_HUMAN Isoform of P35544, 40S ribosomal protein S30 OS=Homo sapiens OX=9606 GN=FAU PE=1 SV=1;sp|P62861|RS30_HUMAN Isoform of P35544, 40S ribosomal protein S30 OS=Homo sapiens OX=9606 GN=FAU PE=1 SV=1	2	1	1	1	10.2	10.2	10.2	10.905	98	98;59	0.0032982	6.6552	NaN	NaN	NaN	1	0	Median	31699000	14243000	17456000	FVNVVPTFGK				438	2761	TRUE	2940	4169;4170	6400;6401	6400			9606;9606
NDUFS3	NADH dehydrogenase [ubiquinone] iron-sulfur protein 3, mitochondrial	NaN	E9PS48;O75489-2;O75489	E9PS48;O75489-2;O75489	1;1;1	1;1;1	1;1;1	tr|E9PS48|E9PS48_HUMAN Isoform of O75489, NADH dehydrogenase [ubiquinone] iron-sulfur protein 3, mitochondrial OS=Homo sapiens OX=9606 GN=NDUFS3 PE=1 SV=1;sp|O75489-2|NDUS3-2_HUMAN Isoform of O75489, Isoform 2 of NADH dehydrogenase [ubiquinone] iron-sulfur	3	1	1	1	8.1	8.1	8.1	17.507	161	161;132;264	0.0020257	6.805	NaN	NaN	NaN	1	0	Median	262430	177220	85206	SLVDLTAVDVPTR				440	7340	TRUE	7898	11296	17148;17149	17148			9606;9606;9606
BAG1		NaN	F1LLU6	F1LLU6	1	1	1	tr|F1LLU6|F1LLU6_HUMAN Isoform of Q99933, BAG family molecular chaperone regulator 1 OS=Homo sapiens OX=9606 GN=BAG1 PE=1 SV=1	1	1	1	1	10	10	10	17.77	160	160	0.0044388	6.4126	NaN	NaN	NaN	1	0	Median	673690	349870	323820	NLTIFDEAHGQSSLAR				441	6234	TRUE	6714	9549	14520	14520			9606
LMBR1	Limb region 1 protein homolog	NaN	F8WCL1;F8WEK4;F8WB14;F8WDW0;F8WEN8;F2Z2Z3;Q8WVP7-2;Q8WVP7;Q8WVP7-3	F8WCL1;F8WEK4;F8WB14;F8WDW0;F8WEN8;F2Z2Z3;Q8WVP7-2;Q8WVP7;Q8WVP7-3	1;1;1;1;1;1;1;1;1	1;1;1;1;1;1;1;1;1	1;1;1;1;1;1;1;1;1	tr|F8WCL1|F8WCL1_HUMAN Isoform of Q8WVP7, Limb region 1 protein homolog OS=Homo sapiens OX=9606 GN=LMBR1 PE=1 SV=1;tr|F8WEK4|F8WEK4_HUMAN Isoform of Q8WVP7, Limb region 1 protein homolog OS=Homo sapiens OX=9606 GN=LMBR1 PE=1 SV=1;tr|F8WB14|F8WB14_HUMAN Iso	9	1	1	1	26.3	26.3	26.3	4.463	38	38;47;48;52;63;77;228;490;531	0.0056747	6.3746	NaN	NaN	NaN	1	0	Median	1624500	909880	714570	MEGQDEVSAR				444	5780	TRUE	6154	8743	13316	13316			9606;9606;9606;9606;9606;9606;9606;9606;9606
BCL7B;BCL7C;BCL7A	B-cell CLL/lymphoma 7 protein family member B;B-cell CLL/lymphoma 7 protein family member A;B-cell CLL/lymphoma 7 protein family member C	NaN	F8WE18;F8WDZ4;I3L4D5;F2Z3H6;I3L1Q2;Q9BQE9-4;Q9BQE9-3;Q9BQE9;Q4VC05;Q8WUZ0;Q4VC05-2;Q8WUZ0-2	F8WE18;F8WDZ4;I3L4D5;F2Z3H6;I3L1Q2;Q9BQE9-4;Q9BQE9-3;Q9BQE9;Q4VC05;Q8WUZ0;Q4VC05-2;Q8WUZ0-2	1;1;1;1;1;1;1;1;1;1;1;1	1;1;1;1;1;1;1;1;1;1;1;1	1;1;1;1;1;1;1;1;1;1;1;1	tr|F8WE18|F8WE18_HUMAN Isoform of Q9BQE9, B-cell CLL/lymphoma 7 protein family member B OS=Homo sapiens OX=9606 GN=BCL7B PE=1 SV=1;tr|F8WDZ4|F8WDZ4_HUMAN Isoform of Q9BQE9, B-cell CLL/lymphoma 7 protein family member B OS=Homo sapiens OX=9606 GN=BCL7B PE=1	12	1	1	1	12.8	12.8	12.8	8.9954	78	78;88;104;213;293;145;163;202;210;217;231;242	0.0032938	6.6494	NaN	NaN	NaN	1	0	Median	803400	458600	344800	WVTVGDTSLR				446	9269	TRUE	9946	14269	21772	21772			9606;9606;9606;9606;9606;9606;9606;9606;9606;9606;9606;9606
GTF2H3	General transcription factor IIH subunit 3	NaN	F5H6X0;F5GXG6;H0YFF7;F5GX35;F5H4K7;F5GWD3;Q13889-2;Q13889	F5H6X0;F5GXG6;H0YFF7;F5GX35;F5H4K7;F5GWD3;Q13889-2;Q13889	1;1;1;1;1;1;1;1	1;1;1;1;1;1;1;1	1;1;1;1;1;1;1;1	tr|F5H6X0|F5H6X0_HUMAN Isoform of Q13889, General transcription factor IIH subunit 3 (Fragment) OS=Homo sapiens OX=9606 GN=GTF2H3 PE=1 SV=1;tr|F5GXG6|F5GXG6_HUMAN Isoform of Q13889, General transcription factor IIH subunit 3 (Fragment) OS=Homo sapiens OX=9	8	1	1	1	9.5	9.5	9.5	16.368	148	148;177;194;200;210;258;267;308	0.0020704	7.0886	NaN	NaN	NaN	1	0	Median	614900	169460	445440	GQHTETLLAGSLAK				447	3233	TRUE	3432	4867	7476	7476			9606;9606;9606;9606;9606;9606;9606;9606
TRMT112	Multifunctional methyltransferase subunit TRM112-like protein	NaN	F5GX77;Q9UI30-2;Q9UI30;F5GYQ2	F5GX77;Q9UI30-2;Q9UI30;F5GYQ2	2;2;2;1	2;2;2;1	2;2;2;1	tr|F5GX77|F5GX77_HUMAN Isoform of Q9UI30, Multifunctional methyltransferase subunit TRM112-like protein OS=Homo sapiens OX=9606 GN=TRMT112 PE=1 SV=1;sp|Q9UI30-2|TR112-2_HUMAN Isoform of Q9UI30, Isoform 2 of Multifunctional methyltransferase subunit TRM112-	4	2	2	2	19.8	19.8	19.8	11.972	106	106;120;125;81	0	13.309	NaN	NaN	NaN	1	0	Median	149310000	62332000	86976000	GPVEGYEENEEFLR;LQATEVR				450	3222;5320	True;True	3421;5648	4846;8071	7450;12301	7450;12301			9606;9606;9606;9606
PUS1	tRNA pseudouridine synthase;tRNA pseudouridine synthase A, mitochondrial	NaN	F5GY32;F5H1S9;G8JLB3;Q9Y606-2;Q9Y606	F5GY32;F5H1S9;G8JLB3;Q9Y606-2;Q9Y606	1;1;1;1;1	1;1;1;1;1	1;1;1;1;1	tr|F5GY32|F5GY32_HUMAN Isoform of Q9Y606, tRNA pseudouridine synthase A (Fragment) OS=Homo sapiens OX=9606 GN=PUS1 PE=1 SV=2;tr|F5H1S9|F5H1S9_HUMAN Isoform of Q9Y606, tRNA pseudouridine synthase OS=Homo sapiens OX=9606 GN=PUS1 PE=1 SV=1;tr|G8JLB3|G8JLB3_HU	5	1	1	1	7.8	7.8	7.8	16.776	153	153;374;384;399;427	0.0032701	6.6176	NaN	NaN	NaN	1	0	Median	562020	456400	105620	GVSAAGQVVSLK				451	3375	TRUE	3580	5088	7811	7811			9606;9606;9606;9606;9606
EIF2B1	Translation initiation factor eIF-2B subunit alpha	NaN	F5H0D0;Q14232-2;Q14232	F5H0D0;Q14232-2;Q14232	1;1;1	1;1;1	1;1;1	tr|F5H0D0|F5H0D0_HUMAN Isoform of Q14232, Translation initiation factor eIF-2B subunit alpha OS=Homo sapiens OX=9606 GN=EIF2B1 PE=1 SV=1;sp|Q14232-2|EI2BA-2_HUMAN Isoform of Q14232, Isoform 2 of Translation initiation factor eIF-2B subunit alpha OS=Homo sa	3	1	1	1	4.5	4.5	4.5	22.287	202	202;222;305	0.0044529	6.4351	NaN	NaN	NaN	1	0	Median	648090	283780	364310	VLEAAVAAK				456	8733	TRUE	9379	13470	20537;20538	20537			9606;9606;9606
PDCD2	Programmed cell death protein 2	NaN	F5H4V9;Q16342-3;Q16342	F5H4V9;Q16342-3;Q16342	1;1;1	1;1;1	1;1;1	tr|F5H4V9|F5H4V9_HUMAN Isoform of Q16342, Programmed cell death protein 2 OS=Homo sapiens OX=9606 GN=PDCD2 PE=1 SV=1;sp|Q16342-3|PDCD2-3_HUMAN Isoform of Q16342, Isoform 3 of Programmed cell death protein 2 OS=Homo sapiens OX=9606 GN=PDCD2 PE=1 SV=2;sp|Q16	3	1	1	1	4	4	4	33.511	298	298;311;344	0.007486	6.3317	NaN	NaN	NaN	1	0	Median	962320	378620	583700	TQIALEPEQILR				462	8134	TRUE	8744	12540	19083;19084;19085	19085			9606;9606;9606
MRPL48	39S ribosomal protein L48, mitochondrial	NaN	F5H702;Q96GC5-3;Q96GC5	F5H702;Q96GC5-3;Q96GC5	1;1;1	1;1;1	1;1;1	tr|F5H702|F5H702_HUMAN Isoform of Q96GC5, 39S ribosomal protein L48, mitochondrial OS=Homo sapiens OX=9606 GN=MRPL48 PE=1 SV=1;sp|Q96GC5-3|RM48-3_HUMAN Isoform of Q96GC5, Isoform 2 of 39S ribosomal protein L48, mitochondrial OS=Homo sapiens OX=9606 GN=MRPL	3	1	1	1	11.5	11.5	11.5	12.77	113	113;194;212	0.0014045	7.2667	NaN	NaN	NaN	1	0	Median	458300	271570	186730	TIEVLQLQDQGSK				466	7926	TRUE	8525	12191	18553;18554	18553			9606;9606;9606
SELK	Selenoprotein K	NaN	F8WAX7;F6XHT0;Q9Y6D0	F8WAX7;F6XHT0;Q9Y6D0	1;1;1	1;1;1	1;1;1	tr|F8WAX7|F8WAX7_HUMAN Isoform of Q9Y6D0, Selenoprotein K OS=Homo sapiens OX=9606 GN=SELENOK PE=1 SV=1;tr|F6XHT0|F6XHT0_HUMAN Isoform of Q9Y6D0, Selenoprotein K OS=Homo sapiens OX=9606 GN=SELENOK PE=1 SV=1;sp|Q9Y6D0|SELK_HUMAN Selenoprotein K OS=Homo sapie	3	1	1	1	16.7	16.7	16.7	8.2912	72	72;93;94	0.0014085	7.3013	NaN	NaN	NaN	1	0	Median	367430	260420	107020	VYISNGQVLDSR				471	9216	TRUE	9890	14175	21627;21628	21627			9606;9606;9606
PIP4K2C	Phosphatidylinositol 5-phosphate 4-kinase type-2 gamma	NaN	F8VNT5;F8VU68;Q8TBX8-3;Q8TBX8	F8VNT5;F8VU68;Q8TBX8-3;Q8TBX8	1;1;1;1	1;1;1;1	1;1;1;1	tr|F8VNT5|F8VNT5_HUMAN Isoform of Q8TBX8, Phosphatidylinositol 5-phosphate 4-kinase type-2 gamma (Fragment) OS=Homo sapiens OX=9606 GN=PIP4K2C PE=1 SV=1;tr|F8VU68|F8VU68_HUMAN Isoform of Q8TBX8, Phosphatidylinositol 5-phosphate 4-kinase type-2 gamma OS=Hom	4	1	1	1	7.5	7.5	7.5	17.952	160	160;171;403;421	0.0020604	7.0167	NaN	NaN	NaN	1	0	Median	266490	140240	126250	NPPSESEGSDGR				472	6300	TRUE	6792	9691	14739;14740	14739			9606;9606;9606;9606
UBE2N;UBE2NL	Ubiquitin-conjugating enzyme E2 N;Putative ubiquitin-conjugating enzyme E2 N-like	NaN	F8VQQ8;P61088;Q5JXB2	F8VQQ8;P61088;Q5JXB2	1;1;1	1;1;1	1;1;1	tr|F8VQQ8|F8VQQ8_HUMAN Isoform of P61088, Ubiquitin-conjugating enzyme E2 N OS=Homo sapiens OX=9606 GN=UBE2N PE=1 SV=1;sp|P61088|UBE2N_HUMAN Ubiquitin-conjugating enzyme E2 N OS=Homo sapiens OX=9606 GN=UBE2N PE=1 SV=1;sp|Q5JXB2|UE2NL_HUMAN Putative ubiquit	3	1	1	1	12.4	12.4	12.4	10.089	89	89;152;153	0.0014588	8.1615	NaN	NaN	NaN	1	0	Median	1090500	793930	296520	TNEAQAIETAR				476	8068	TRUE	8677	12446	18930;18931	18931			9606;9606;9606
SMARCD1	SWI/SNF-related matrix-associated actin-dependent regulator of chromatin subfamily D member 1	NaN	H0YHV1;F8VRQ4;Q96GM5	H0YHV1;F8VRQ4;Q96GM5	1;1;1	1;1;1	1;1;1	tr|H0YHV1|H0YHV1_HUMAN Isoform of Q96GM5, SWI/SNF-related matrix-associated actin-dependent regulator of chromatin subfamily D member 1 (Fragment) OS=Homo sapiens OX=9606 GN=SMARCD1 PE=1 SV=1;tr|F8VRQ4|F8VRQ4_HUMAN Isoform of Q96GM5, SWI/SNF-related matrix	3	1	1	1	10.4	10.4	10.4	13.526	115	115;313;515	0.0014286	7.5111	NaN	NaN	NaN	1	0	Median	451000	248360	202640	IHETIETINQLK				478	3833	TRUE	4058	5782	8890	8890			9606;9606;9606
SPATS2	Spermatogenesis-associated serine-rich protein 2	NaN	F8VS10;Q86XZ4	F8VS10;Q86XZ4	1;1	1;1	1;1	tr|F8VS10|F8VS10_HUMAN Isoform of Q86XZ4, Spermatogenesis-associated serine-rich protein 2 OS=Homo sapiens OX=9606 GN=SPATS2 PE=1 SV=1;sp|Q86XZ4|SPAS2_HUMAN Spermatogenesis-associated serine-rich protein 2 OS=Homo sapiens OX=9606 GN=SPATS2 PE=1 SV=1	2	1	1	1	5.1	5.1	5.1	32.475	295	295;545	0.001462	8.3231	NaN	NaN	NaN	1	1	Median	387230	198520	188710	SVSIQEEQSAPSSEK				479	7639	TRUE	8218	11730;11731	17842;17843;17844	17844			9606;9606
TWF1	Twinfilin-1	NaN	F8VS81;Q12792-4;Q12792	F8VS81;Q12792-4;Q12792	1;1;1	1;1;1	1;1;1	tr|F8VS81|F8VS81_HUMAN Isoform of Q12792, Twinfilin-1 (Fragment) OS=Homo sapiens OX=9606 GN=TWF1 PE=1 SV=1;sp|Q12792-4|TWF1-4_HUMAN Isoform of Q12792, Isoform 4 of Twinfilin-1 OS=Homo sapiens OX=9606 GN=TWF1 PE=1 SV=3;sp|Q12792|TWF1_HUMAN Twinfilin-1 OS=Ho	3	1	1	1	4.5	4.5	4.5	33.408	291	291;252;350	0.0014215	7.4234	NaN	NaN	NaN	1	0	Median	276430	183840	92592	INEVQTDVGVDTK				480	4028	TRUE	4276	6108	9407;9408;9409	9409			9606;9606;9606
YLPM1	YLP motif-containing protein 1	NaN	F8VU51;P49750-3;P49750-1;P49750	F8VU51;P49750-3;P49750-1;P49750	1;1;1;1	1;1;1;1	1;1;1;1	tr|F8VU51|F8VU51_HUMAN Isoform of P49750, YLP motif-containing protein 1 OS=Homo sapiens OX=9606 GN=YLPM1 PE=1 SV=1;sp|P49750-3|YLPM1-3_HUMAN Isoform of P49750, Isoform 3 of YLP motif-containing protein 1 OS=Homo sapiens OX=9606 GN=YLPM1 PE=1 SV=4;sp|P4975	4	1	1	1	0.9	0.9	0.9	160.74	1440	1440;1862;1951;2146	0.0014749	9.1601	NaN	NaN	NaN	1	0	Median	269000	148830	120170	TTVQQEPLESGAK				482	8239	TRUE	8855	12695	19307;19308	19308			9606;9606;9606;9606
SDS	L-serine dehydratase/L-threonine deaminase	NaN	F8VW93;P20132	F8VW93;P20132	1;1	1;1	1;1	tr|F8VW93|F8VW93_HUMAN Isoform of P20132, L-serine dehydratase/L-threonine deaminase (Fragment) OS=Homo sapiens OX=9606 GN=SDS PE=1 SV=1;sp|P20132|SDHL_HUMAN L-serine dehydratase/L-threonine deaminase OS=Homo sapiens OX=9606 GN=SDS PE=1 SV=2	2	1	1	1	10.3	10.3	10.3	10.146	97	97;328	1	-2	NaN	NaN	NaN	1	0	Median	998110	545130	452980	MMSGEPLHVK	+			486	5897	TRUE	6330	8990	13668	13668	268;269	1;2	9606;9606
UBAP2L	Ubiquitin-associated protein 2-like	NaN	Q5VU77;F8W726;Q14157-4;Q14157-1;Q14157-3;Q14157;Q14157-5	Q5VU77;F8W726;Q14157-4;Q14157-1;Q14157-3;Q14157;Q14157-5	1;1;1;1;1;1;1	1;1;1;1;1;1;1	1;1;1;1;1;1;1	tr|Q5VU77|Q5VU77_HUMAN Isoform of Q14157, Ubiquitin-associated protein 2-like (Fragment) OS=Homo sapiens OX=9606 GN=UBAP2L PE=1 SV=1;tr|F8W726|F8W726_HUMAN Isoform of Q14157, Ubiquitin-associated protein 2-like OS=Homo sapiens OX=9606 GN=UBAP2L PE=1 SV=2;s	7	1	1	1	2.6	2.6	2.6	37.961	350	350;1079;976;983;1068;1087;1104	0.0079608	6.2118	NaN	NaN	NaN	1	0	Median	301280	163810	137480	IDLAVLLGK				495	3675	TRUE	3894	5542	8508	8508			9606;9606;9606;9606;9606;9606;9606
TMED4	Transmembrane emp24 domain-containing protein 4	NaN	F8W7F7;Q7Z7H5-3;Q7Z7H5-2;Q7Z7H5	F8W7F7;Q7Z7H5-3;Q7Z7H5-2;Q7Z7H5	1;1;1;1	1;1;1;1	1;1;1;1	tr|F8W7F7|F8W7F7_HUMAN Isoform of Q7Z7H5, Transmembrane emp24 domain-containing protein 4 OS=Homo sapiens OX=9606 GN=TMED4 PE=1 SV=1;sp|Q7Z7H5-3|TMED4-3_HUMAN Isoform of Q7Z7H5, Isoform 3 of Transmembrane emp24 domain-containing protein 4 OS=Homo sapiens O	4	1	1	1	7.9	7.9	7.9	20.118	178	178;186;211;227	1	-2	NaN	NaN	NaN	0	0	Median	0	0	0	MAGVGAGPLRAMGR	+			496	5717	TRUE	6062	8628	13131	13131	273	1	9606;9606;9606;9606
ASL	Argininosuccinate lyase	NaN	F8W943;P04424-3;P04424-2;P04424	F8W943;P04424-3;P04424-2;P04424	1;1;1;1	1;1;1;1	1;1;1;1	tr|F8W943|F8W943_HUMAN Isoform of P04424, Argininosuccinate lyase (Fragment) OS=Homo sapiens OX=9606 GN=ASL PE=1 SV=1;sp|P04424-3|ARLY-3_HUMAN Isoform of P04424, Isoform 3 of Argininosuccinate lyase OS=Homo sapiens OX=9606 GN=ASL PE=1 SV=4;sp|P04424-2|ARLY	4	1	1	1	5.8	5.8	5.8	27.379	242	242;438;444;464	0.0062539	6.3381	NaN	NaN	NaN	1	0	Median	454680	265210	189470	LNSNDEDIHTANER				498	5264	TRUE	5591	7995	12178	12178			9606;9606;9606;9606
NCBP2	Nuclear cap-binding protein subunit 2	NaN	F8WE41;P52298-3;P52298	F8WE41;P52298-3;P52298	1;1;1	1;1;1	1;1;1	tr|F8WE41|F8WE41_HUMAN Isoform of P52298, Nuclear cap-binding protein subunit 2 OS=Homo sapiens OX=9606 GN=NCBP2 PE=1 SV=1;sp|P52298-3|NCBP2-3_HUMAN Isoform of P52298, Isoform 3 of Nuclear cap-binding protein subunit 2 OS=Homo sapiens OX=9606 GN=NCBP2 PE=1	3	1	1	1	20.4	20.4	20.4	6.199	54	54;103;156	0.0062617	6.3426	NaN	NaN	NaN	1	0	Median	2794800	1571100	1223700	SDSYVELSQYR				501	7036	TRUE	7575	10815	16452;16453	16453			9606;9606;9606
RPS19BP1	Active regulator of SIRT1	NaN	F8WFE7;Q86WX3	F8WFE7;Q86WX3	1;1	1;1	1;1	tr|F8WFE7|F8WFE7_HUMAN Isoform of Q86WX3, Active regulator of SIRT1 OS=Homo sapiens OX=9606 GN=RPS19BP1 PE=1 SV=1;sp|Q86WX3|AROS_HUMAN Active regulator of SIRT1 OS=Homo sapiens OX=9606 GN=RPS19BP1 PE=1 SV=1	2	1	1	1	17.4	17.4	17.4	7.3806	69	69;136	0.0014545	8.0655	NaN	NaN	NaN	1	0	Median	260820	153180	107640	GLELLAASEAPR				502	3104	TRUE	3298	4676	7178	7178			9606;9606
TMED10	Transmembrane emp24 domain-containing protein 10	NaN	G3V2K7;P49755	G3V2K7;P49755	1;1	1;1	1;1	tr|G3V2K7|G3V2K7_HUMAN Isoform of P49755, Transmembrane emp24 domain-containing protein 10 OS=Homo sapiens OX=9606 GN=TMED10 PE=1 SV=1;sp|P49755|TMEDA_HUMAN Transmembrane emp24 domain-containing protein 10 OS=Homo sapiens OX=9606 GN=TMED10 PE=1 SV=2	2	1	1	1	7.2	7.2	7.2	16.904	153	153;219	0.003871	6.5184	NaN	NaN	NaN	1	1	Median	163660	110500	53160	IPDQLVILDMK				507	4051	TRUE	4303	6142	9459	9459			9606;9606
SCFD1	Sec1 family domain-containing protein 1	NaN	G3V3K9;G3V4I1;G3V5F3;J3KNG4;Q8WVM8	G3V3K9;G3V4I1;G3V5F3;J3KNG4;Q8WVM8	1;1;1;1;1	1;1;1;1;1	1;1;1;1;1	tr|G3V3K9|G3V3K9_HUMAN Isoform of Q8WVM8, Sec1 family domain-containing protein 1 OS=Homo sapiens OX=9606 GN=SCFD1 PE=1 SV=1;tr|G3V4I1|G3V4I1_HUMAN Isoform of Q8WVM8, Sec1 family domain-containing protein 1 OS=Homo sapiens OX=9606 GN=SCFD1 PE=1 SV=1;tr|G3V	5	1	1	1	31.2	31.2	31.2	5.0969	48	48;75;121;163;642	0.00074294	10.461	NaN	NaN	NaN	0	0	Median	0	0	0	AAAAAATAAAAASIR				509	4	TRUE	5	12	15	15			9606;9606;9606;9606;9606
TMX1	Thioredoxin-related transmembrane protein 1	NaN	G3V448;Q9H3N1	G3V448;Q9H3N1	1;1	1;1	1;1	tr|G3V448|G3V448_HUMAN Isoform of Q9H3N1, Thioredoxin-related transmembrane protein 1 OS=Homo sapiens OX=9606 GN=TMX1 PE=1 SV=1;sp|Q9H3N1|TMX1_HUMAN Thioredoxin-related transmembrane protein 1 OS=Homo sapiens OX=9606 GN=TMX1 PE=1 SV=1	2	1	1	1	11.4	11.4	11.4	11.911	105	105;280	0.0014503	8.0492	NaN	NaN	NaN	1	0	Median	1077500	758260	319290	VDVTEQPGLSGR				510	8470	TRUE	9100	13056	19887;19888	19887			9606;9606
WDR89	WD repeat-containing protein 89	NaN	G3V4B8;Q96FK6	G3V4B8;Q96FK6	1;1	1;1	1;1	tr|G3V4B8|G3V4B8_HUMAN Isoform of Q96FK6, WD repeat-containing protein 89 (Fragment) OS=Homo sapiens OX=9606 GN=WDR89 PE=1 SV=1;sp|Q96FK6|WDR89_HUMAN WD repeat-containing protein 89 OS=Homo sapiens OX=9606 GN=WDR89 PE=2 SV=1	2	1	1	1	8	8	8	24.798	226	226;387	0.0020877	7.2006	NaN	NaN	NaN	1	0	Median	359240	178290	180950	DSLGAYSETHSDDVTQVR				511	1427	TRUE	1528	2172	3293	3293			9606;9606
ITPK1	Inositol-tetrakisphosphate 1-kinase	NaN	G3V4M9;Q13572	G3V4M9;Q13572	1;1	1;1	1;1	tr|G3V4M9|G3V4M9_HUMAN Isoform of Q13572, Inositol 1,3,4-triphosphate 5/6 kinase, isoform CRA_c OS=Homo sapiens OX=9606 GN=ITPK1 PE=1 SV=1;sp|Q13572|ITPK1_HUMAN Inositol-tetrakisphosphate 1-kinase OS=Homo sapiens OX=9606 GN=ITPK1 PE=1 SV=2	2	1	1	1	4.4	4.4	4.4	31.717	295	295;414	0.0039037	6.5828	NaN	NaN	NaN	1	0	Median	406570	273590	132980	LLAEPAGGLVGER				512	5011	TRUE	5319	7606	11610	11610			9606;9606
ALDH6A1		NaN	G3V4Z4	G3V4Z4	1	1	1	tr|G3V4Z4|G3V4Z4_HUMAN Isoform of Q02252, Methylmalonate-semialdehyde dehydrogenase [acylating], mitochondrial OS=Homo sapiens OX=9606 GN=ALDH6A1 PE=1 SV=1	1	1	1	1	5.6	5.6	5.6	27.025	252	252	1	-2	NaN	NaN	NaN	0	0	Median	0	0	0	GAKNHGVVMPDANK	+			513	2819	TRUE	3001	4253	6534	6534	279	10	9606
MIPOL1		NaN	G3V5R6;G5EA54;Q49AL5	G3V5R6;G5EA54;Q49AL5	1;1;1	1;1;1	1;1;1	tr|G3V5R6|G3V5R6_HUMAN Isoform of Q8TD10, Mirror-image polydactyly gene 1 protein OS=Homo sapiens OX=9606 GN=MIPOL1 PE=1 SV=1;tr|G5EA54|G5EA54_HUMAN Isoform of Q8TD10, Mirror-image polydactyly 1, isoform CRA_b OS=Homo sapiens OX=9606 GN=MIPOL1 PE=1 SV=1;tr	3	1	1	1	5	5	5	20.807	180	180;411;424	1	-2	NaN	NaN	NaN	0	0	Median	0	0	0	NSEKSMHRK	+			515	6338	TRUE	6836	9774	14881	14881	280	7	9606;9606;9606
SDCBP	Syntenin-1	NaN	G5EA09;O00560-2	G5EA09;O00560-2	1;1	1;1	1;1	tr|G5EA09|G5EA09_HUMAN Isoform of O00560, Syndecan binding protein (Syntenin), isoform CRA_a OS=Homo sapiens OX=9606 GN=SDCBP PE=1 SV=1;sp|O00560-2|SDCB1-2_HUMAN Isoform of O00560, Isoform 2 of Syntenin-1 OS=Homo sapiens OX=9606 GN=SDCBP PE=1 SV=1	2	1	1	1	5.3	5.3	5.3	34.819	318	318;297	0.0014631	8.4197	NaN	NaN	NaN	1	0	Median	233910	121010	112900	ANVAVVSGAPLQGLVAR				520	648	TRUE	691	961	1445;1446;1447	1447			9606;9606
STAT3	Signal transducer and activator of transcription;Signal transducer and activator of transcription 3	NaN	G8JLH9;P40763-3;P40763-2;P40763	G8JLH9;P40763-3;P40763-2;P40763	1;1;1;1	1;1;1;1	1;1;1;1	tr|G8JLH9|G8JLH9_HUMAN Isoform of P40763, Signal transducer and activator of transcription OS=Homo sapiens OX=9606 GN=STAT3 PE=1 SV=1;sp|P40763-3|STAT3-3_HUMAN Isoform of P40763, Isoform 3 of Signal transducer and activator of transcription 3 OS=Homo sapie	4	1	1	1	3.9	3.9	3.9	76.138	672	672;722;769;770	0.0014771	9.4824	NaN	NaN	NaN	1	0	Median	579170	388210	190960	LLQTAATAAQQGGQANHPTAAVVTEK				523	5151	TRUE	5460	7812	11918;11919	11918			9606;9606;9606;9606
ALDH1A3	Aldehyde dehydrogenase family 1 member A3	NaN	H0Y2X5;P47895	H0Y2X5;P47895	1;1	1;1	1;1	tr|H0Y2X5|H0Y2X5_HUMAN Isoform of P47895, Aldehyde dehydrogenase 1 family, member A3, isoform CRA_b OS=Homo sapiens OX=9606 GN=ALDH1A3 PE=1 SV=1;sp|P47895|AL1A3_HUMAN Aldehyde dehydrogenase family 1 member A3 OS=Homo sapiens OX=9606 GN=ALDH1A3 PE=1 SV=2	2	1	1	1	2.5	2.5	2.5	44.256	405	405;512	0.0074906	6.3322	NaN	NaN	NaN	1	1	Median	153630	100120	53502	ILELIESGKK				526	3929	TRUE	4158	5942	9123	9123			9606;9606
SP100		NaN	H0Y4R8;P23497-4	H0Y4R8;P23497-4	1;1	1;1	1;1	tr|H0Y4R8|H0Y4R8_HUMAN Isoform of P23497, Nuclear autoantigen Sp-100 (Fragment) OS=Homo sapiens OX=9606 GN=SP100 PE=1 SV=1;sp|P23497-4|SP100-4_HUMAN Isoform of P23497, Isoform Sp100-C of Nuclear autoantigen Sp-100 OS=Homo sapiens OX=9606 GN=SP100 PE=1 SV=3	2	1	1	1	4.6	4.6	4.6	30.619	259	259;885	1	-2	NaN	NaN	NaN	1	0	Median	291760	197740	94022	VKTSLNEQMYTR	+			530	8705	TRUE	9348	13417	20468	20468	284	200	9606;9606
UTP15	U3 small nucleolar RNA-associated protein 15 homolog	NaN	H0Y8P4;Q8TED0-2;Q8TED0-3;Q8TED0	H0Y8P4;Q8TED0-2;Q8TED0-3;Q8TED0	1;1;1;1	1;1;1;1	1;1;1;1	tr|H0Y8P4|H0Y8P4_HUMAN Isoform of Q8TED0, U3 small nucleolar RNA-associated protein 15 homolog (Fragment) OS=Homo sapiens OX=9606 GN=UTP15 PE=1 SV=1;sp|Q8TED0-2|UTP15-2_HUMAN Isoform of Q8TED0, Isoform 2 of U3 small nucleolar RNA-associated protein 15 homo	4	1	1	1	1.8	1.8	1.8	61.32	545	545;328;499;518	0.0026649	6.7183	NaN	NaN	NaN	1	0	Median	207950	109270	98681	FLLLQGLVEK				535	2607	TRUE	2773	3952	6063;6064;6065	6064			9606;9606;9606;9606
RUFY1	RUN and FYVE domain-containing protein 1	NaN	H0YA47;Q96T51-2;Q96T51;H0YAC8	H0YA47;Q96T51-2;Q96T51;H0YAC8	2;2;2;1	2;2;2;1	2;2;2;1	tr|H0YA47|H0YA47_HUMAN Isoform of Q96T51, RUN and FYVE domain-containing protein 1 (Fragment) OS=Homo sapiens OX=9606 GN=RUFY1 PE=1 SV=1;sp|Q96T51-2|RUFY1-2_HUMAN Isoform of Q96T51, Isoform 2 of RUN and FYVE domain-containing protein 1 OS=Homo sapiens OX=9	4	2	2	2	5.8	5.8	5.8	38.223	328	328;600;708;271	0	12.413	NaN	NaN	NaN	1	0	Median	284510	154870	129640	AQNAESSLQQK;LQQELGGR				536	718;5370	True;True	764;5700	1081;8144	1625;1626;12414	1625;12414			9606;9606;9606;9606
MRPL49	39S ribosomal protein L49, mitochondrial	NaN	H0YDP7;Q13405	H0YDP7;Q13405	1;1	1;1	1;1	tr|H0YDP7|H0YDP7_HUMAN Isoform of Q13405, 39S ribosomal protein L49, mitochondrial (Fragment) OS=Homo sapiens OX=9606 GN=MRPL49 PE=1 SV=1;sp|Q13405|RM49_HUMAN 39S ribosomal protein L49, mitochondrial OS=Homo sapiens OX=9606 GN=MRPL49 PE=1 SV=1	2	1	1	1	11	11	11	14.572	127	127;166	0	12.267	NaN	NaN	NaN	1	0	Median	320010	245140	74873	TPVTQVNEVTGTLR				538	8125	TRUE	8735	12530	19066;19067	19067			9606;9606
EHBP1L1	EH domain-binding protein 1-like protein 1	NaN	H0YDZ9;Q8N3D4	H0YDZ9;Q8N3D4	1;1	1;1	1;1	tr|H0YDZ9|H0YDZ9_HUMAN Isoform of Q8N3D4, EH domain-binding protein 1-like protein 1 (Fragment) OS=Homo sapiens OX=9606 GN=EHBP1L1 PE=1 SV=1;sp|Q8N3D4|EH1L1_HUMAN EH domain-binding protein 1-like protein 1 OS=Homo sapiens OX=9606 GN=EHBP1L1 PE=1 SV=2	2	1	1	1	4.9	4.9	4.9	27.592	265	265;1523	0.0038536	6.4934	NaN	NaN	NaN	1	1	Median	171190	95112	76082	AQEAEAGVLGNEK				539	699	TRUE	745	1057	1584	1584			9606;9606
FBXO21	F-box only protein 21	NaN	H0YHF6;Q4G104;O94952-1;O94952	H0YHF6;Q4G104;O94952-1;O94952	1;1;1;1	1;1;1;1	1;1;1;1	tr|H0YHF6|H0YHF6_HUMAN Isoform of O94952, F-box only protein 21 (Fragment) OS=Homo sapiens OX=9606 GN=FBXO21 PE=1 SV=1;tr|Q4G104|Q4G104_HUMAN Isoform of O94952, F-box only protein 21 OS=Homo sapiens OX=9606 GN=FBXO21 PE=1 SV=1;sp|O94952-1|FBX21-1_HUMAN Iso	4	1	1	1	4.9	4.9	4.9	25.74	225	225;537;621;628	0.0020964	7.213	NaN	NaN	NaN	1	0	Median	549070	291560	257510	EGIDQSYQLLR				540	1839	TRUE	1965	2811	4293;4294	4293			9606;9606;9606;9606
AHSA1	Activator of 90 kDa heat shock protein ATPase homolog 1	NaN	H0YJG7;O95433-2;O95433;H0YJ63;H0YJU2;G3V438	H0YJG7;O95433-2;O95433;H0YJ63;H0YJU2;G3V438	2;2;2;1;1;1	2;2;2;1;1;1	2;2;2;1;1;1	tr|H0YJG7|H0YJG7_HUMAN Isoform of O95433, Activator of 90 kDa heat shock protein ATPase homolog 1 (Fragment) OS=Homo sapiens OX=9606 GN=AHSA1 PE=1 SV=1;sp|O95433-2|AHSA1-2_HUMAN Isoform of O95433, Isoform 2 of Activator of 90 kDa heat shock protein ATPase	6	2	2	2	11.1	11.1	11.1	23.697	216	216;288;338;90;133;203	0	12.478	NaN	NaN	NaN	1	0	Median	651510	424730	226780	DEPDTNLVALMK;ETFLTSPEELYR				541	1116;2296	True;True	1188;2440	1703;3474	2574;5336	2574;5336			9606;9606;9606;9606;9606;9606
YY1	Transcriptional repressor protein YY1	NaN	H0YJU4;H0YJV7;P25490	H0YJU4;H0YJV7;P25490	1;1;1	1;1;1	1;1;1	tr|H0YJU4|H0YJU4_HUMAN Isoform of P25490, Transcriptional repressor protein YY1 (Fragment) OS=Homo sapiens OX=9606 GN=YY1 PE=1 SV=1;tr|H0YJV7|H0YJV7_HUMAN Isoform of P25490, Transcriptional repressor protein YY1 (Fragment) OS=Homo sapiens OX=9606 GN=YY1 PE	3	1	1	1	16.3	16.3	16.3	12.977	123	123;190;414	0.0014144	7.3943	NaN	NaN	NaN	1	0	Median	425140	261420	163720	SYLSGGAGAAGGGGADPGNK				542	7669	TRUE	8251	11780	17924;17925	17925			9606;9606;9606
WDR61	WD repeat-containing protein 61;WD repeat-containing protein 61, N-terminally processed	NaN	H0YM76;H0YMF9;H0YL19;H0YN81;Q9GZS3	H0YM76;H0YMF9;H0YL19;H0YN81;Q9GZS3	1;1;1;1;1	1;1;1;1;1	1;1;1;1;1	tr|H0YM76|H0YM76_HUMAN Isoform of Q9GZS3, WD repeat-containing protein 61 OS=Homo sapiens OX=9606 GN=WDR61 PE=1 SV=1;tr|H0YMF9|H0YMF9_HUMAN Isoform of Q9GZS3, WD repeat-containing protein 61 OS=Homo sapiens OX=9606 GN=WDR61 PE=1 SV=1;tr|H0YL19|H0YL19_HUMAN	5	1	1	1	18.8	18.8	18.8	5.4821	48	48;189;212;294;305	0.0097205	6.1348	NaN	NaN	NaN	1	0	Median	360780	194710	166070	TNQYGILFK				544	8081	TRUE	8691	12465	18959	18959			9606;9606;9606;9606;9606
MPHOSPH6	M-phase phosphoprotein 6	NaN	H3BSB3;H3BNT4;Q99547	H3BSB3;H3BNT4;Q99547	1;1;1	1;1;1	1;1;1	tr|H3BSB3|H3BSB3_HUMAN Isoform of Q99547, M-phase phosphoprotein 6 OS=Homo sapiens OX=9606 GN=MPHOSPH6 PE=1 SV=1;tr|H3BNT4|H3BNT4_HUMAN Isoform of Q99547, M-phase phosphoprotein 6 OS=Homo sapiens OX=9606 GN=MPHOSPH6 PE=1 SV=1;sp|Q99547|MPH6_HUMAN M-phase p	3	1	1	1	13	13	13	15.489	131	131;142;160	0.0038486	6.4837	NaN	NaN	NaN	1	0	Median	298460	174220	124230	DHANYEEDENGDITPIK				554	1188	TRUE	1267	1804	2723	2723			9606;9606;9606
FAM96B	Mitotic spindle-associated MMXD complex subunit MIP18	NaN	H3BNV7;Q9Y3D0	H3BNV7;Q9Y3D0	1;1	1;1	1;1	tr|H3BNV7|H3BNV7_HUMAN Isoform of Q9Y3D0, Cytosolic iron-sulfur assembly component 2B (Fragment) OS=Homo sapiens OX=9606 GN=CIAO2B PE=1 SV=1;sp|Q9Y3D0|CIA2B_HUMAN Cytosolic iron-sulfur assembly component 2B OS=Homo sapiens OX=9606 GN=CIAO2B PE=1 SV=1	2	1	1	1	13.7	13.7	13.7	17.461	161	161;163	0	11.897	NaN	NaN	NaN	1	0	Median	637870	392730	245140	SGERPVTAGEEDEQVPDSIDAR				555	7146	TRUE	7692	10965	16682;16683;16684	16682			9606;9606
HAGH	Hydroxyacylglutathione hydrolase, mitochondrial	NaN	H3BQW8;H3BPK3;H3BPQ4;Q16775-3;Q16775-2;Q16775	H3BQW8;H3BPK3;H3BPQ4;Q16775-3;Q16775-2;Q16775	1;1;1;1;1;1	1;1;1;1;1;1	1;1;1;1;1;1	tr|H3BQW8|H3BQW8_HUMAN Isoform of Q16775, Hydroxyacylglutathione hydrolase, mitochondrial (Fragment) OS=Homo sapiens OX=9606 GN=HAGH PE=1 SV=1;tr|H3BPK3|H3BPK3_HUMAN Isoform of Q16775, Hydroxyacylglutathione hydrolase, mitochondrial (Fragment) OS=Homo sapi	6	1	1	1	7.5	7.5	7.5	17.272	160	160;239;258;236;260;308	0.0014514	8.053	NaN	NaN	NaN	1	0	Median	832270	531150	301120	EAAIVDPVQPQK				557	1554	TRUE	1659	2361	3588;3589;3590	3589			9606;9606;9606;9606;9606;9606
RPAP1	RNA polymerase II-associated protein 1	NaN	H3BRE8;Q9BWH6-2;Q9BWH6	H3BRE8;Q9BWH6-2;Q9BWH6	1;1;1	1;1;1	1;1;1	tr|H3BRE8|H3BRE8_HUMAN Isoform of Q9BWH6, RNA polymerase II-associated protein 1 OS=Homo sapiens OX=9606 GN=RPAP1 PE=1 SV=1;sp|Q9BWH6-2|RPAP1-2_HUMAN Isoform of Q9BWH6, Isoform 2 of RNA polymerase II-associated protein 1 OS=Homo sapiens OX=9606 GN=RPAP1 PE	3	1	1	1	1.6	1.6	1.6	123.07	1128	1128;1315;1393	0.0014388	7.7279	NaN	NaN	NaN	1	0	Median	431280	271570	159710	DQEAEQEAQTIHEENIAR				559	1375	TRUE	1475	2099	3184;3185	3185			9606;9606;9606
BCKDK	[3-methyl-2-oxobutanoate dehydrogenase [lipoamide]] kinase, mitochondrial	NaN	H3BTL2;H3BS02;O14874-2;O14874-3;O14874	H3BTL2;H3BS02;O14874-2;O14874-3;O14874	1;1;1;1;1	1;1;1;1;1	1;1;1;1;1	tr|H3BTL2|H3BTL2_HUMAN Isoform of O14874, [3-methyl-2-oxobutanoate dehydrogenase [lipoamide]] kinase, mitochondrial (Fragment) OS=Homo sapiens OX=9606 GN=BCKDK PE=1 SV=8;tr|H3BS02|H3BS02_HUMAN Isoform of O14874, [3-methyl-2-oxobutanoate dehydrogenase [lipo	5	1	1	1	4.2	4.2	4.2	24.208	216	216;217;335;365;412	0.0079365	6.1883	NaN	NaN	NaN	1	0	Median	586690	363460	223230	YLQQELPVR				561	9448	TRUE	10136	14551	22215	22215			9606;9606;9606;9606;9606
PDCD7	Programmed cell death protein 7	NaN	H3BT73;Q8N8D1	H3BT73;Q8N8D1	1;1	1;1	1;1	tr|H3BT73|H3BT73_HUMAN Isoform of Q8N8D1, Programmed cell death protein 7 (Fragment) OS=Homo sapiens OX=9606 GN=PDCD7 PE=1 SV=1;sp|Q8N8D1|PDCD7_HUMAN Programmed cell death protein 7 OS=Homo sapiens OX=9606 GN=PDCD7 PE=1 SV=1	2	1	1	1	10.7	10.7	10.7	11.978	103	103;485	0.0080645	6.2923	NaN	NaN	NaN	1	0	Median	272020	116100	155920	AAADGVLSEVR				565	17	TRUE	19	27	40	40			9606;9606
CSMD3	CUB and sushi domain-containing protein 3	NaN	H7BXX0;Q7Z407-5;Q7Z407-3;Q7Z407-4;Q7Z407-2;Q7Z407	H7BXX0;Q7Z407-5;Q7Z407-3;Q7Z407-4;Q7Z407-2;Q7Z407	1;1;1;1;1;1	1;1;1;1;1;1	1;1;1;1;1;1	tr|H7BXX0|H7BXX0_HUMAN Isoform of Q7Z407, CUB and sushi domain-containing protein 3 (Fragment) OS=Homo sapiens OX=9606 GN=CSMD3 PE=1 SV=1;sp|Q7Z407-5|CSMD3-5_HUMAN Isoform of Q7Z407, Isoform 5 of CUB and sushi domain-containing protein 3 OS=Homo sapiens OX	6	1	1	1	0.4	0.4	0.4	325.59	2977	2977;2675;3538;3637;3667;3707	0.0097029	6.1165	NaN	NaN	NaN	1	0	Median	580840	513730	67112	VWDGPPENDMLLK				571	9199	TRUE	9873	14142	21578	21578			9606;9606;9606;9606;9606;9606
PDIA3		NaN	H7BZJ3	H7BZJ3	4	1	1	tr|H7BZJ3|H7BZJ3_HUMAN Isoform of P30101, Protein disulfide-isomerase A3 (Fragment) OS=Homo sapiens OX=9606 GN=PDIA3 PE=1 SV=1	1	4	1	1	39	11.4	11.4	13.519	123	123	0	17.016	NaN	NaN	NaN	1	1	Median	3712000	2441400	1270600	DGEEAGAYDGPR;SDVLELTDDNFESR;VDCTANTNTCNK;YGVSGYPTLK				573	1161;7043;8439;9381	False;True;False;False	1237;7582;9067;10064	1765;10824;10825;13001;14452	2666;2667;16466;16467;19804;22056;22057;22058	2667;16467;19804;22056			9606
FANCD2	Fanconi anemia group D2 protein	NaN	H7BZJ7;Q9BXW9-3;Q9BXW9;Q9BXW9-1	H7BZJ7;Q9BXW9-3;Q9BXW9;Q9BXW9-1	1;1;1;1	1;1;1;1	1;1;1;1	tr|H7BZJ7|H7BZJ7_HUMAN Isoform of Q9BXW9, Fanconi anemia group D2 protein (Fragment) OS=Homo sapiens OX=9606 GN=FANCD2 PE=1 SV=1;sp|Q9BXW9-3|FACD2-3_HUMAN Isoform of Q9BXW9, Isoform 3 of Fanconi anemia group D2 protein OS=Homo sapiens OX=9606 GN=FANCD2 PE=	4	1	1	1	1.5	1.5	1.5	84.108	749	749;1249;1451;1471	0.0044558	6.4362	NaN	NaN	NaN	1	0	Median	261540	133110	128430	TSSSDTLSEEK				574	8190	TRUE	8803	12617	19187	19187			9606;9606;9606;9606
AUTS2		NaN	H7C090;Q8WXX7-5	H7C090;Q8WXX7-5	1;1	1;1	1;1	tr|H7C090|H7C090_HUMAN Isoform of Q8WXX7, Autism susceptibility gene 2 protein (Fragment) OS=Homo sapiens OX=9606 GN=AUTS2 PE=1 SV=2;sp|Q8WXX7-5|AUTS2-5_HUMAN Isoform of Q8WXX7, Isoform 5 of Autism susceptibility gene 2 protein OS=Homo sapiens OX=9606 GN=A	2	1	1	1	7.5	7.5	7.5	16.564	147	147;680	1	-2	NaN	NaN	NaN	1	1	Median	2354100	2281300	72707	MPTPAPPMFDK	+			575	5916	TRUE	6354	9016	13705	13705	295;296	1;8	9606;9606
WBSCR22	Probable 18S rRNA (guanine-N(7))-methyltransferase	NaN	H7C0G4;O43709;O43709-3	H7C0G4;O43709;O43709-3	1;1;1	1;1;1	1;1;1	tr|H7C0G4|H7C0G4_HUMAN Isoform of O43709, Probable 18S rRNA (guanine-N(7))-methyltransferase (Fragment) OS=Homo sapiens OX=9606 GN=BUD23 PE=1 SV=1;sp|O43709|BUD23_HUMAN Probable 18S rRNA (guanine-N(7))-methyltransferase OS=Homo sapiens OX=9606 GN=BUD23 PE=	3	1	1	1	16.9	16.9	16.9	7.7469	65	65;281;298	0.0014245	7.4438	NaN	NaN	NaN	1	0	Median	454340	303560	150790	EVRPDTQYTGR				576	2392	TRUE	2547	3639	5592	5592			9606;9606;9606
PRKAR2A;PRKAR2B	cAMP-dependent protein kinase type II-alpha regulatory subunit;cAMP-dependent protein kinase type II-beta regulatory subunit	NaN	H7C330;P13861-2;P13861;P31323	H7C330;P13861-2;P13861;P31323	1;1;1;1	1;1;1;1	1;1;1;1	tr|H7C330|H7C330_HUMAN Isoform of P13861, cAMP-dependent protein kinase type II-alpha regulatory subunit (Fragment) OS=Homo sapiens OX=9606 GN=PRKAR2A PE=1 SV=1;sp|P13861-2|KAP2-2_HUMAN Isoform of P13861, Isoform 2 of cAMP-dependent protein kinase type II-	4	1	1	1	16.3	16.3	16.3	10.021	92	92;382;404;418	0.0020478	6.9181	NaN	NaN	NaN	0	0	Median	388600	284110	104500	GQYFGELALVTNKPR				578	3257	TRUE	3456	4897	7525	7525			9606;9606;9606;9606
SDCCAG3	Serologically defined colon cancer antigen 3	NaN	H7C331;Q96C92-4;Q96C92-3;Q96C92-2;Q96C92	H7C331;Q96C92-4;Q96C92-3;Q96C92-2;Q96C92	1;1;1;1;1	1;1;1;1;1	1;1;1;1;1	tr|H7C331|H7C331_HUMAN Isoform of Q96C92, Endosome-associated-trafficking regulator 1 (Fragment) OS=Homo sapiens OX=9606 GN=ENTR1 PE=1 SV=1;sp|Q96C92-4|ENTR1-4_HUMAN Isoform of Q96C92, Isoform 4 of Endosome-associated-trafficking regulator 1 OS=Homo sapien	5	1	1	1	4.2	4.2	4.2	18.875	167	167;362;377;412;435	1	-2	NaN	NaN	NaN	0	0	Median	0	0	0	LEAKMIK	+			579	4675	TRUE	4959	7079	10835	10835	297	51	9606;9606;9606;9606;9606
MGEA5	Protein O-GlcNAcase	NaN	H7C3X0;O60502-3;O60502-2;O60502-4;O60502	H7C3X0;O60502-3;O60502-2;O60502-4;O60502	1;1;1;1;1	1;1;1;1;1	1;1;1;1;1	tr|H7C3X0|H7C3X0_HUMAN Isoform of O60502, Protein O-GlcNAcase (Fragment) OS=Homo sapiens OX=9606 GN=OGA PE=1 SV=1;sp|O60502-3|OGA-3_HUMAN Isoform of O60502, Isoform 3 of Protein O-GlcNAcase OS=Homo sapiens OX=9606 GN=OGA PE=1 SV=2;sp|O60502-2|OGA-2_HUMAN I	5	1	1	1	4.7	4.7	4.7	29.725	256	256;677;849;863;916	0.0056854	6.3926	NaN	NaN	NaN	0	0	Median	0	0	0	EIPVESIEEVSK				583	1947	TRUE	2077	2968	4541	4541			9606;9606;9606;9606;9606
MYO7A	Unconventional myosin-VIIa	NaN	H7C4D8;Q13402-5;Q13402-8;Q13402-2;Q13402-7;Q13402-6;Q13402	H7C4D8;Q13402-5;Q13402-8;Q13402-2;Q13402-7;Q13402-6;Q13402	1;1;1;1;1;1;1	1;1;1;1;1;1;1	1;1;1;1;1;1;1	tr|H7C4D8|H7C4D8_HUMAN Isoform of Q13402, Unconventional myosin-VIIa (Fragment) OS=Homo sapiens OX=9606 GN=MYO7A PE=1 SV=1;sp|Q13402-5|MYO7A-5_HUMAN Isoform of Q13402, Isoform 5 of Unconventional myosin-VIIa OS=Homo sapiens OX=9606 GN=MYO7A PE=1 SV=2;sp|Q1	7	1	1	1	0.8	0.8	0.8	155.92	1357	1357;2092;2166;2175;2177;2185;2215	1	-2	NaN	NaN	NaN	1	1	Median	67422	62756	4665.9	VMVSKARGKDR	+			584	8880	TRUE	9539	13700	20914	20914	303	876	9606;9606;9606;9606;9606;9606;9606
SRPRB	Signal recognition particle receptor subunit beta	NaN	H7C4H2;Q9Y5M8	H7C4H2;Q9Y5M8	1;1	1;1	1;1	tr|H7C4H2|H7C4H2_HUMAN Isoform of Q9Y5M8, Signal recognition particle receptor subunit beta (Fragment) OS=Homo sapiens OX=9606 GN=SRPRB PE=1 SV=1;sp|Q9Y5M8|SRPRB_HUMAN Signal recognition particle receptor subunit beta OS=Homo sapiens OX=9606 GN=SRPRB PE=1	2	1	1	1	11.9	11.9	11.9	17.502	160	160;271	0.0014399	7.8324	NaN	NaN	NaN	1	0	Median	465750	309940	155820	SAAPSTLDSSSTAPAQLGK				585	6928	TRUE	7462	10674	16233;16234;16235	16234			9606;9606
NUP188	Nucleoporin NUP188 homolog	NaN	H7C4K7;Q5SRE5-2;Q5SRE5	H7C4K7;Q5SRE5-2;Q5SRE5	1;1;1	1;1;1	1;1;1	tr|H7C4K7|H7C4K7_HUMAN Uncharacterized protein (Fragment) OS=Homo sapiens OX=9606 PE=4 SV=2;sp|Q5SRE5-2|NU188-2_HUMAN Isoform of Q5SRE5, Isoform 2 of Nucleoporin NUP188 homolog OS=Homo sapiens OX=9606 GN=NUP188 PE=1 SV=1;sp|Q5SRE5|NU188_HUMAN Nucleoporin N	3	1	1	1	10.3	10.3	10.3	12.31	107	107;1638;1749	0.0014075	7.2998	NaN	NaN	NaN	1	0	Median	614220	287850	326370	ELSQIEAELNK				586	2094	TRUE	2231	3187	4897;4898	4898			9606;9606;9606
ITGB1	Integrin beta-1	NaN	H7C4N8;P05556-2;P05556;P05556-5;P05556-4;P05556-3	H7C4N8;P05556-2;P05556;P05556-5;P05556-4;P05556-3	2;2;2;2;2;2	2;2;2;2;2;2	2;2;2;2;2;2	tr|H7C4N8|H7C4N8_HUMAN Isoform of P05556, Integrin beta-1 (Fragment) OS=Homo sapiens OX=9606 GN=ITGB1 PE=1 SV=1;sp|P05556-2|ITB1-2_HUMAN Isoform of P05556, Isoform 2 of Integrin beta-1 OS=Homo sapiens OX=9606 GN=ITGB1 PE=1 SV=2;sp|P05556|ITB1_HUMAN Integri	6	2	2	2	19.4	19.4	19.4	11.495	108	108;789;798;801;819;825	0	11.299	NaN	NaN	NaN	1	1	Median	230590	126750	103850	DNTNEIYSGK;FCECDNFNCDR				587	1349;2462	True;True	1446;2618	2062;3728	3116;5719	3116;5719			9606;9606;9606;9606;9606;9606
FYTTD1	UAP56-interacting factor	NaN	H9KVD1;H9KVD5;Q96QD9-4;Q96QD9-2;Q96QD9	H9KVD1;H9KVD5;Q96QD9-4;Q96QD9-2;Q96QD9	1;1;1;1;1	1;1;1;1;1	1;1;1;1;1	tr|H9KVD1|H9KVD1_HUMAN Isoform of Q96QD9, UAP56-interacting factor OS=Homo sapiens OX=9606 GN=FYTTD1 PE=1 SV=1;tr|H9KVD5|H9KVD5_HUMAN Isoform of Q96QD9, UAP56-interacting factor (Fragment) OS=Homo sapiens OX=9606 GN=FYTTD1 PE=1 SV=1;sp|Q96QD9-4|UIF-4_HUMAN	5	1	1	1	9.1	9.1	9.1	13.854	121	121;126;129;292;318	0.0074766	6.3272	NaN	NaN	NaN	1	0	Median	295730	136770	158960	LLQQSGAQQFR				590	5147	TRUE	5456	7807	11909	11909			9606;9606;9606;9606;9606
MRPL20	39S ribosomal protein L20, mitochondrial	NaN	I3L2X1;Q9BYC9;Q9BYC9-2	I3L2X1;Q9BYC9;Q9BYC9-2	1;1;1	1;1;1	1;1;1	tr|I3L2X1|I3L2X1_HUMAN Isoform of Q9BYC9, 39S ribosomal protein L20, mitochondrial (Fragment) OS=Homo sapiens OX=9606 GN=MRPL20 PE=1 SV=1;sp|Q9BYC9|RM20_HUMAN 39S ribosomal protein L20, mitochondrial OS=Homo sapiens OX=9606 GN=MRPL20 PE=1 SV=1;sp|Q9BYC9-2|	3	1	1	1	16.7	16.7	16.7	7.5961	66	66;149;155	0.003861	6.5051	NaN	NaN	NaN	1	0	Median	335810	191630	144180	ITAASQEHGLK				595	4175	TRUE	4429	6315	9706	9706			9606;9606;9606
BABAM1	BRISC and BRCA1-A complex member 1	NaN	M0QXG9;M0R3F4;M0R2A4;M0R2K3;M0R193;M0R0I0;M0R2I2;J3KQS6;Q9NWV8-3;Q9NWV8	M0QXG9;M0R3F4;M0R2A4;M0R2K3;M0R193;M0R0I0;M0R2I2;J3KQS6;Q9NWV8-3;Q9NWV8	1;1;1;1;1;1;1;1;1;1	1;1;1;1;1;1;1;1;1;1	1;1;1;1;1;1;1;1;1;1	tr|M0QXG9|M0QXG9_HUMAN Isoform of Q9NWV8, BRISC and BRCA1-A complex member 1 OS=Homo sapiens OX=9606 GN=BABAM1 PE=1 SV=2;tr|M0R3F4|M0R3F4_HUMAN Isoform of Q9NWV8, BRISC and BRCA1-A complex member 1 (Fragment) OS=Homo sapiens OX=9606 GN=BABAM1 PE=1 SV=1;tr|	10	1	1	1	10.2	10.2	10.2	11.545	108	108;181;193;200;218;225;237;254;171;329	0.0038685	6.5149	NaN	NaN	NaN	1	0	Median	654780	432370	222410	AVGAQASVGSR				603	918	TRUE	976	1369	2054	2054			9606;9606;9606;9606;9606;9606;9606;9606;9606;9606
MAP2K3	Dual specificity mitogen-activated protein kinase kinase 3	NaN	J3KRV4;P46734-2;P46734;P46734-3	J3KRV4;P46734-2;P46734;P46734-3	1;1;1;1	1;1;1;1	1;1;1;1	tr|J3KRV4|J3KRV4_HUMAN Isoform of P46734, Dual-specificity mitogen-activated protein kinase kinase 3 (Fragment) OS=Homo sapiens OX=9606 GN=MAP2K3 PE=1 SV=1;sp|P46734-2|MP2K3-2_HUMAN Isoform of P46734, Isoform 1 of Dual specificity mitogen-activated protein	4	1	1	1	10.3	10.3	10.3	15.005	136	136;318;347;352	0.0039062	6.5918	NaN	NaN	NaN	1	0	Median	215590	129500	86084	QVVEEPSPQLPADR				607	6829	TRUE	7357	10510	15996;15997;15998	15998			9606;9606;9606;9606
ICT1	Peptidyl-tRNA hydrolase ICT1, mitochondrial	NaN	J3KS15;Q14197	J3KS15;Q14197	1;1	1;1	1;1	tr|J3KS15|J3KS15_HUMAN Isoform of Q14197, Peptidyl-tRNA hydrolase ICT1, mitochondrial (Fragment) OS=Homo sapiens OX=9606 GN=MRPL58 PE=1 SV=1;sp|Q14197|ICT1_HUMAN Peptidyl-tRNA hydrolase ICT1, mitochondrial OS=Homo sapiens OX=9606 GN=MRPL58 PE=1 SV=1	2	1	1	1	6.2	6.2	6.2	21.905	192	192;206	0.0020161	6.7784	NaN	NaN	NaN	1	0	Median	328480	207610	120870	LGELILTSESSR				608	4838	TRUE	5135	7332	11204;11205	11205			9606;9606
GPR142	Probable G-protein coupled receptor 142	NaN	J3QSD0;J3QLF2;Q7Z601	J3QSD0;J3QLF2;Q7Z601	1;1;1	1;1;1	1;1;1	tr|J3QSD0|J3QSD0_HUMAN Isoform of Q7Z601, Probable G-protein-coupled receptor 142 OS=Homo sapiens OX=9606 GN=GPR142 PE=4 SV=1;tr|J3QLF2|J3QLF2_HUMAN Isoform of Q7Z601, Probable G-protein-coupled receptor 142 OS=Homo sapiens OX=9606 GN=GPR142 PE=4 SV=1;sp|Q	3	1	1	1	10.9	10.9	10.9	11.264	101	101;131;462	1	-2	NaN	NaN	NaN	0	0	Median	1091600	1091600	0	MSIMMLPMEQK	+			613	5947	TRUE	6400	9075	13788	13788	314;315;316	1;4;5	9606;9606;9606
SAP30BP	SAP30-binding protein	NaN	J3QQJ0;Q9UHR5-2;Q9UHR5	J3QQJ0;Q9UHR5-2;Q9UHR5	1;1;1	1;1;1	1;1;1	tr|J3QQJ0|J3QQJ0_HUMAN Isoform of Q9UHR5, SAP30-binding protein (Fragment) OS=Homo sapiens OX=9606 GN=SAP30BP PE=1 SV=1;sp|Q9UHR5-2|S30BP-2_HUMAN Isoform of Q9UHR5, Isoform 2 of SAP30-binding protein OS=Homo sapiens OX=9606 GN=SAP30BP PE=1 SV=1;sp|Q9UHR5|S	3	1	1	1	3.7	3.7	3.7	35.772	325	325;292;308	0.0044444	6.4249	NaN	NaN	NaN	1	1	Median	1309600	703710	605930	TTVISAVGTIVK				616	8238	TRUE	8854	12693;12694	19305;19306	19306			9606;9606;9606
OTOP3		NaN	J3QS90	J3QS90	1	1	1	tr|J3QS90|J3QS90_HUMAN Isoform of Q7RTS5, Proton channel OTOP3 OS=Homo sapiens OX=9606 GN=OTOP3 PE=1 SV=1	1	1	1	1	28.3	28.3	28.3	4.7734	46	46	1	-2	NaN	NaN	NaN	0	0	Median	206900	0	206900	MRFPKSTEKSMGR	+			624	5942	TRUE	6395	9070	13782	13782	318	11	9606
TRPC3	Short transient receptor potential channel 3	NaN	J3QTB0;Q13507;Q13507-3;Q13507-2	J3QTB0;Q13507;Q13507-3;Q13507-2	1;1;1;1	1;1;1;1	1;1;1;1	tr|J3QTB0|J3QTB0_HUMAN Isoform of Q13507, Short transient receptor potential channel 3 OS=Homo sapiens OX=9606 GN=TRPC3 PE=3 SV=1;sp|Q13507|TRPC3_HUMAN Short transient receptor potential channel 3 OS=Homo sapiens OX=9606 GN=TRPC3 PE=1 SV=3;sp|Q13507-3|TRPC	4	1	1	1	1.6	1.6	1.6	91.201	793	793;836;848;921	1	-2	NaN	NaN	NaN	1	1	Median	29938000	107430	29831000	LQKDIEMGMGNSK	+			626	5354	TRUE	5683	8118	12374	12374	321;322	685;687	9606;9606;9606;9606
MBD3	Methyl-CpG-binding domain protein 3	NaN	K7EIE8;O95983-2;O95983	K7EIE8;O95983-2;O95983	1;1;1	1;1;1	1;1;1	tr|K7EIE8|K7EIE8_HUMAN Isoform of O95983, Methyl-CpG binding domain protein 3, isoform CRA_b OS=Homo sapiens OX=9606 GN=MBD3 PE=1 SV=1;sp|O95983-2|MBD3-2_HUMAN Isoform of O95983, Isoform 2 of Methyl-CpG-binding domain protein 3 OS=Homo sapiens OX=9606 GN=M	3	1	1	1	4.3	4.3	4.3	26.322	235	235;259;291	0.0044416	6.4152	NaN	NaN	NaN	1	0	Median	331770	179510	152260	KQEELVQQVR				629	4421	TRUE	4693	6701	10274	10274			9606;9606;9606
PFN1	Profilin-1	NaN	K7EJ44;P07737	K7EJ44;P07737	1;1	1;1	1;1	tr|K7EJ44|K7EJ44_HUMAN Isoform of P07737, Profilin OS=Homo sapiens OX=9606 GN=PFN1 PE=1 SV=1;sp|P07737|PROF1_HUMAN Profilin-1 OS=Homo sapiens OX=9606 GN=PFN1 PE=1 SV=2	2	1	1	1	13.5	13.5	13.5	11.39	104	104;140	0.001444	7.9595	NaN	NaN	NaN	1	0	Median	5468800	4259300	1209500	STGGAPTFNVTVTK				630	7561	TRUE	8139	11629	17702;17703	17703			9606;9606
LGALS3BP	Galectin-3-binding protein	NaN	K7EQT9;K7ES75;K7EN99;K7ERZ6;K7EJD3;K7ESM3;K7EKQ5;K7EP36;Q08380	K7EQT9;K7ES75;K7EN99;K7ERZ6;K7EJD3;K7ESM3;K7EKQ5;K7EP36;Q08380	1;1;1;1;1;1;1;1;1	1;1;1;1;1;1;1;1;1	1;1;1;1;1;1;1;1;1	tr|K7EQT9|K7EQT9_HUMAN Isoform of Q08380, Galectin-3-binding protein OS=Homo sapiens OX=9606 GN=LGALS3BP PE=1 SV=1;tr|K7ES75|K7ES75_HUMAN Isoform of Q08380, Galectin-3-binding protein (Fragment) OS=Homo sapiens OX=9606 GN=LGALS3BP PE=1 SV=1;tr|K7EN99|K7EN9	9	1	1	1	22.9	22.9	22.9	5.3751	48	48;88;113;131;205;209;210;259;585	0.0020094	6.7394	NaN	NaN	NaN	1	0	Median	879060	530230	348830	LADGGATNQGR				632	4498	TRUE	4775	6830	10454	10454			9606;9606;9606;9606;9606;9606;9606;9606;9606
LSM12	Protein LSM12 homolog	NaN	K7ELG9;Q3MHD2;Q3MHD2-2	K7ELG9;Q3MHD2;Q3MHD2-2	1;1;1	1;1;1	1;1;1	tr|K7ELG9|K7ELG9_HUMAN Isoform of Q3MHD2, Protein LSM12 homolog OS=Homo sapiens OX=9606 GN=LSM12 PE=1 SV=1;sp|Q3MHD2|LSM12_HUMAN Protein LSM12 homolog OS=Homo sapiens OX=9606 GN=LSM12 PE=1 SV=2;sp|Q3MHD2-2|LSM12-2_HUMAN Isoform of Q3MHD2, Isoform 2 of Prot	3	1	1	1	5.7	5.7	5.7	24.955	230	230;195;198	0.0014728	9.0845	NaN	NaN	NaN	1	0	Median	444440	302230	142200	LQGEVVAFDYQSK				638	5344	TRUE	5673	8106	12352;12353	12352			9606;9606;9606
VASP	Vasodilator-stimulated phosphoprotein	NaN	K7EM16;P50552	K7EM16;P50552	1;1	1;1	1;1	tr|K7EM16|K7EM16_HUMAN Isoform of P50552, Vasodilator-stimulated phosphoprotein (Fragment) OS=Homo sapiens OX=9606 GN=VASP PE=1 SV=1;sp|P50552|VASP_HUMAN Vasodilator-stimulated phosphoprotein OS=Homo sapiens OX=9606 GN=VASP PE=1 SV=3	2	1	1	1	6.6	6.6	6.6	20.047	183	183;380	0.0020675	7.0601	NaN	NaN	NaN	1	0	Median	216160	135670	80484	DESANQEEPEAR				640	1119	TRUE	1191	1706	2577;2578	2577			9606;9606
FAM134C	Protein FAM134C	NaN	K7EQI9;Q86VR2-2;Q86VR2	K7EQI9;Q86VR2-2;Q86VR2	1;1;1	1;1;1	1;1;1	tr|K7EQI9|K7EQI9_HUMAN Isoform of Q86VR2, Reticulophagy regulator 3 OS=Homo sapiens OX=9606 GN=RETREG3 PE=1 SV=1;sp|Q86VR2-2|RETR3-2_HUMAN Isoform of Q86VR2, Isoform 2 of Reticulophagy regulator 3 OS=Homo sapiens OX=9606 GN=RETREG3 PE=1 SV=1;sp|Q86VR2|RETR	3	1	1	1	3.8	3.8	3.8	40.779	369	369;271;466	1	-2	NaN	NaN	NaN	1	1	Median	1229200	1218900	10370	LDFSVRGYMMSKQR	+			645	4620	TRUE	4903	7010	10741	10741	334;335	137;138	9606;9606;9606
MYDGF	Myeloid-derived growth factor	NaN	M0QXF7;M0QYN0;Q969H8	M0QXF7;M0QYN0;Q969H8	1;1;1	1;1;1	1;1;1	tr|M0QXF7|M0QXF7_HUMAN Isoform of Q969H8, Myeloid-derived growth factor (Fragment) OS=Homo sapiens OX=9606 GN=MYDGF PE=1 SV=1;tr|M0QYN0|M0QYN0_HUMAN Isoform of Q969H8, Myeloid-derived growth factor OS=Homo sapiens OX=9606 GN=MYDGF PE=1 SV=1;sp|Q969H8|MYDGF	3	1	1	1	17.9	17.9	17.9	9.5594	84	84;189;173	0.003856	6.4946	NaN	NaN	NaN	1	0	Median	497200	341760	155440	ESDVPLKTEEFEVTK				650	2247	TRUE	2389	3403	5230;5231	5231			9606;9606;9606
MYO9B	Unconventional myosin-IXb	NaN	M0R300;M0R0P8;Q13459-2;Q13459	M0R300;M0R0P8;Q13459-2;Q13459	2;2;2;2	2;2;2;2	2;2;2;2	tr|M0R300|M0R300_HUMAN Isoform of Q13459, Unconventional myosin-IXb (Fragment) OS=Homo sapiens OX=9606 GN=MYO9B PE=1 SV=8;tr|M0R0P8|M0R0P8_HUMAN Isoform of Q13459, Unconventional myosin-IXb OS=Homo sapiens OX=9606 GN=MYO9B PE=1 SV=1;sp|Q13459-2|MYO9B-2_HUM	4	2	2	2	1.2	1.2	1.2	234.07	2071	2071;2157;2022;2157	0	12.64	NaN	NaN	NaN	0	0	Median	0	0	0	AQPAAETTDGER;ATGAALTPTEER				654	720;843	True;True	766;898	1083;1253	1629;1878	1629;1878			9606;9606;9606;9606
KIF2A	Kinesin-like protein KIF2A	NaN	O00139-2;O00139-1;O00139-5;O00139;O00139-4	O00139-2;O00139-1;O00139-5;O00139;O00139-4	2;2;2;2;2	2;2;2;2;2	2;2;2;2;2	sp|O00139-2|KIF2A-2_HUMAN Isoform of O00139, Isoform 2 of Kinesin-like protein KIF2A OS=Homo sapiens OX=9606 GN=KIF2A PE=1 SV=3;sp|O00139-1|KIF2A-1_HUMAN Isoform of O00139, Isoform 1 of Kinesin-like protein KIF2A OS=Homo sapiens OX=9606 GN=KIF2A PE=1 SV=3;	5	2	2	2	2.9	2.9	2.9	75.042	660	660;679;686;706;744	0	11.428	NaN	NaN	NaN	1	0	Median	361170	202270	158900	FSLIDLAGNER;IDILTELR				657	2713;3670	True;True	2891;3888	4094;5535	6291;8499	6291;8499			9606;9606;9606;9606;9606
RTCA	RNA 3-terminal phosphate cyclase	NaN	O00442;O00442-2	O00442;O00442-2	1;1	1;1	1;1	sp|O00442|RTCA_HUMAN RNA 3-terminal phosphate cyclase OS=Homo sapiens OX=9606 GN=RTCA PE=1 SV=1;sp|O00442-2|RTCA-2_HUMAN Isoform of O00442, Isoform 2 of RNA 3-terminal phosphate cyclase OS=Homo sapiens OX=9606 GN=RTCA PE=1 SV=1	2	1	1	1	2.7	2.7	2.7	39.336	366	366;379	0.0096794	6.1119	NaN	NaN	NaN	1	0	Median	339150	231460	107690	AFVAGVLPFK				669	298	TRUE	315	427	638;639	639			9606;9606
NDUFA4	Cytochrome c oxidase subunit NDUFA4	NaN	O00483	O00483	1	1	1	sp|O00483|NDUA4_HUMAN Cytochrome c oxidase subunit NDUFA4 OS=Homo sapiens OX=9606 GN=NDUFA4 PE=1 SV=1	1	1	1	1	12.3	12.3	12.3	9.3697	81	81	0.0033025	6.6582	NaN	NaN	NaN	1	0	Median	1885100	1219200	665820	FYSVNVDYSK				670	2790	TRUE	2970	4207	6453;6454	6453			9606
PODXL	Podocalyxin	NaN	O00592-2;O00592	O00592-2;O00592	1;1	1;1	1;1	sp|O00592-2|PODXL-2_HUMAN Isoform of O00592, Isoform 2 of Podocalyxin OS=Homo sapiens OX=9606 GN=PODXL PE=1 SV=2;sp|O00592|PODXL_HUMAN Podocalyxin OS=Homo sapiens OX=9606 GN=PODXL PE=1 SV=2	2	1	1	1	2.5	2.5	2.5	55.385	526	526;558	0.0020394	6.8812	NaN	NaN	NaN	1	0	Median	461730	260300	201420	LASVPGSQTVVVK				675	4585	TRUE	4866	6951	10646;10647	10647			9606;9606
KMT2D	Histone-lysine N-methyltransferase 2D	NaN	O14686;O14686-3	O14686;O14686-3	1;1	1;1	1;1	sp|O14686|KMT2D_HUMAN Histone-lysine N-methyltransferase 2D OS=Homo sapiens OX=9606 GN=KMT2D PE=1 SV=2;sp|O14686-3|KMT2D-3_HUMAN Isoform of O14686, Isoform 3 of Histone-lysine N-methyltransferase 2D OS=Homo sapiens OX=9606 GN=KMT2D PE=1 SV=2	2	1	1	1	0.2	0.2	0.2	593.38	5537	5537;5540	1	-2	NaN	NaN	NaN	1	0	Median	1682400	1435300	247080	GEGGVEHMECEIK	+			677	2906	TRUE	3090	4369	6713	6713	382	1660	9606;9606
HAT1	Histone acetyltransferase type B catalytic subunit	NaN	O14929-2;O14929	O14929-2;O14929	1;1	1;1	1;1	sp|O14929-2|HAT1-2_HUMAN Isoform of O14929, Isoform B of Histone acetyltransferase type B catalytic subunit OS=Homo sapiens OX=9606 GN=HAT1 PE=1 SV=1;sp|O14929|HAT1_HUMAN Histone acetyltransferase type B catalytic subunit OS=Homo sapiens OX=9606 GN=HAT1 PE	2	1	1	1	3.9	3.9	3.9	39.786	334	334;419	0.0020548	6.9959	NaN	NaN	NaN	1	0	Median	236970	152930	84043	LLVTDMSDAEQYR				680	5185	TRUE	5499	7858	11982	11982	383	257	9606;9606
GAK	Cyclin-G-associated kinase	NaN	O14976-2;O14976	O14976-2;O14976	1;1	1;1	1;1	sp|O14976-2|GAK-2_HUMAN Isoform of O14976, Isoform 2 of Cyclin-G-associated kinase OS=Homo sapiens OX=9606 GN=GAK PE=1 SV=2;sp|O14976|GAK_HUMAN Cyclin-G-associated kinase OS=Homo sapiens OX=9606 GN=GAK PE=1 SV=2	2	1	1	1	1	1	1	134.46	1232	1232;1311	0.0020562	6.9975	NaN	NaN	NaN	1	0	Median	349760	231370	118390	AVVMTPVPLFSK				682	974	TRUE	1037	1461	2197;2198;2199	2198			9606;9606
		NaN	O15165-7;O15165-6	O15165-7;O15165-6	1;1	1;1	1;1	sp|O15165-7|LRAD4-7_HUMAN Isoform of O15165, Isoform 7 of Low-density lipoprotein receptor class A domain-containing protein 4 OS=Homo sapiens OX=9606 GN=LDLRAD4 PE=1 SV=1;sp|O15165-6|LRAD4-6_HUMAN Isoform of O15165, Isoform 6 of Low-density lipoprotein re	2	1	1	1	4.8	4.8	4.8	28.247	251	251;269	1	-2	NaN	NaN	NaN	1	1	Median	4849900	4636600	213320	MSSDHLNNSTLK	+			686	5951	TRUE	6404	9079	13793	13793	387	1	9606;9606
TTI1	TELO2-interacting protein 1 homolog	NaN	O43156	O43156	1	1	1	sp|O43156|TTI1_HUMAN TELO2-interacting protein 1 homolog OS=Homo sapiens OX=9606 GN=TTI1 PE=1 SV=3	1	1	1	1	1.3	1.3	1.3	122.07	1089	1089	0.0014025	7.2457	NaN	NaN	NaN	1	0	Median	262110	156380	105730	LAGSLVTQAPISAR				694	4531	TRUE	4809	6876	10522	10522			9606
AP1G1	AP-1 complex subunit gamma-1	NaN	O43747;O43747-2	O43747;O43747-2	1;1	1;1	1;1	sp|O43747|AP1G1_HUMAN AP-1 complex subunit gamma-1 OS=Homo sapiens OX=9606 GN=AP1G1 PE=1 SV=5;sp|O43747-2|AP1G1-2_HUMAN Isoform of O43747, Isoform 2 of AP-1 complex subunit gamma-1 OS=Homo sapiens OX=9606 GN=AP1G1 PE=1 SV=5	2	1	1	1	1.3	1.3	1.3	91.35	822	822;825	0.0020619	7.0207	NaN	NaN	NaN	1	0	Median	302140	206580	95557	TVQTDHNAVQR				707	8293	TRUE	8912	12775	19441	19441			9606;9606
CCNT2	Cyclin-T2	NaN	O60583-2;O60583	O60583-2;O60583	1;1	1;1	1;1	sp|O60583-2|CCNT2-2_HUMAN Isoform of O60583, Isoform 2 of Cyclin-T2 OS=Homo sapiens OX=9606 GN=CCNT2 PE=1 SV=2;sp|O60583|CCNT2_HUMAN Cyclin-T2 OS=Homo sapiens OX=9606 GN=CCNT2 PE=1 SV=2	2	1	1	1	2.7	2.7	2.7	73.681	663	663;730	0.0044814	6.4639	NaN	NaN	NaN	1	0	Median	189940	98111	91825	SPVGLSSDGISSSSSSSR				719	7428	TRUE	7998	11430	17383	17383			9606;9606
FZD2;FZD7;FZD1	Frizzled-2;Frizzled-7;Frizzled-1	NaN	Q14332;O75084;Q9UP38	Q14332;O75084;Q9UP38	1;1;1	1;1;1	1;1;1	sp|Q14332|FZD2_HUMAN Frizzled-2 OS=Homo sapiens OX=9606 GN=FZD2 PE=1 SV=1;sp|O75084|FZD7_HUMAN Frizzled-7 OS=Homo sapiens OX=9606 GN=FZD7 PE=1 SV=2;sp|Q9UP38|FZD1_HUMAN Frizzled-1 OS=Homo sapiens OX=9606 GN=FZD1 PE=1 SV=2	3	1	1	1	1.6	1.6	1.6	63.553	565	565;574;647	1	-2	NaN	NaN	NaN	1	0	Median	460400	245680	214720	QGCEALMNK	+			727	6636	TRUE	7158	10222	15585	15585	418	125	9606;9606;9606
SIN3B	Paired amphipathic helix protein Sin3b	NaN	O75182-3;O75182-2;O75182	O75182-3;O75182-2;O75182	1;1;1	1;1;1	1;1;1	sp|O75182-3|SIN3B-3_HUMAN Isoform of O75182, Isoform 3 of Paired amphipathic helix protein Sin3b OS=Homo sapiens OX=9606 GN=SIN3B PE=1 SV=2;sp|O75182-2|SIN3B-2_HUMAN Isoform of O75182, Isoform 2 of Paired amphipathic helix protein Sin3b OS=Homo sapiens OX=	3	1	1	1	5.1	5.1	5.1	39.506	353	353;1130;1162	0.002069	7.0631	NaN	NaN	NaN	1	1	Median	150100	84498	65605	AHAGGGSGGSGAGGPAGR				730	366	TRUE	384	523	789	789			9606;9606;9606
UFL1	E3 UFM1-protein ligase 1	NaN	O94874-2;O94874	O94874-2;O94874	1;1	1;1	1;1	sp|O94874-2|UFL1-2_HUMAN Isoform of O94874, Isoform 2 of E3 UFM1-protein ligase 1 OS=Homo sapiens OX=9606 GN=UFL1 PE=1 SV=2;sp|O94874|UFL1_HUMAN E3 UFM1-protein ligase 1 OS=Homo sapiens OX=9606 GN=UFL1 PE=1 SV=2	2	1	1	1	2.1	2.1	2.1	82.097	729	729;794	0.0039139	6.6011	NaN	NaN	NaN	1	0	Median	256040	134180	121860	SVFMSSTTSASGTGR				750	7615	TRUE	8194	11701	17798;17799	17798			9606;9606
RPP14	Ribonuclease P protein subunit p14	NaN	O95059	O95059	1	1	1	sp|O95059|RPP14_HUMAN Ribonuclease P protein subunit p14 OS=Homo sapiens OX=9606 GN=RPP14 PE=1 SV=3	1	1	1	1	7.3	7.3	7.3	13.693	124	124	0.0097146	6.1275	NaN	NaN	NaN	1	0	Median	755360	415010	340350	PAPAATYER				754	6462	TRUE	6971	9967	15193;15194	15193			9606
LETM1	LETM1 and EF-hand domain-containing protein 1, mitochondrial	NaN	O95202	O95202	1	1	1	sp|O95202|LETM1_HUMAN Mitochondrial proton/calcium exchanger protein OS=Homo sapiens OX=9606 GN=LETM1 PE=1 SV=1	1	1	1	1	1.6	1.6	1.6	83.353	739	739	0.0014577	8.1507	NaN	NaN	NaN	1	0	Median	312060	220140	91922	VAEVEGEQVDNK				756	8365	TRUE	8989	12891	19615;19616	19615			9606
LYPLA2	Acyl-protein thioesterase 2	NaN	Q5QPQ0;O95372	Q5QPQ0;O95372	1;1	1;1	1;1	tr|Q5QPQ0|Q5QPQ0_HUMAN Isoform of O95372, Acyl-protein thioesterase 2 OS=Homo sapiens OX=9606 GN=LYPLA2 PE=1 SV=1;sp|O95372|LYPA2_HUMAN Acyl-protein thioesterase 2 OS=Homo sapiens OX=9606 GN=LYPLA2 PE=1 SV=1	2	1	1	1	4.9	4.9	4.9	17.659	164	164;231	0.0079511	6.2051	NaN	NaN	NaN	1	0	Median	1783100	1136200	646870	FGALTAEK				758	2530	TRUE	2691	3828	5881;5882	5882			9606;9606
ZFYVE9	Zinc finger FYVE domain-containing protein 9	NaN	O95405-3;O95405-2;O95405	O95405-3;O95405-2;O95405	1;1;1	1;1;1	1;1;1	sp|O95405-3|ZFYV9-3_HUMAN Isoform of O95405, Isoform 3 of Zinc finger FYVE domain-containing protein 9 OS=Homo sapiens OX=9606 GN=ZFYVE9 PE=1 SV=2;sp|O95405-2|ZFYV9-2_HUMAN Isoform of O95405, Isoform 2 of Zinc finger FYVE domain-containing protein 9 OS=Hom	3	1	1	1	0.9	0.9	0.9	83.72	762	762;1366;1425	1	-2	NaN	NaN	NaN	0	0	Median	0	0	0	LLYMDRK	+			760	5193	TRUE	5507	7866	11990	11990	440	742	9606;9606;9606
ASMTL	N-acetylserotonin O-methyltransferase-like protein	NaN	O95671-3;O95671-2;O95671	O95671-3;O95671-2;O95671	1;1;1	1;1;1	1;1;1	sp|O95671-3|ASML-3_HUMAN Isoform of O95671, Isoform 3 of Probable bifunctional dTTP/UTP pyrophosphatase/methyltransferase protein OS=Homo sapiens OX=9606 GN=ASMTL PE=1 SV=3;sp|O95671-2|ASML-2_HUMAN Isoform of O95671, Isoform 2 of Probable bifunctional dTTP	3	1	1	1	3	3	3	62.442	563	563;605;621	0.0014154	7.3984	NaN	NaN	NaN	1	0	Median	556550	397520	159030	AEAGEAGQATAEAECHR				763	201	TRUE	212	284	428	428			9606;9606;9606
GNA14;GNAQ;GNA11	Guanine nucleotide-binding protein subunit alpha-14;Guanine nucleotide-binding protein G(q) subunit alpha;Guanine nucleotide-binding protein subunit alpha-11	NaN	O95837;P50148;P29992	O95837;P50148;P29992	1;1;1	1;1;1	1;1;1	sp|O95837|GNA14_HUMAN Guanine nucleotide-binding protein subunit alpha-14 OS=Homo sapiens OX=9606 GN=GNA14 PE=1 SV=1;sp|P50148|GNAQ_HUMAN Guanine nucleotide-binding protein G(q) subunit alpha OS=Homo sapiens OX=9606 GN=GNAQ PE=1 SV=4;sp|P29992|GNA11_HUMAN	3	1	1	1	3.1	3.1	3.1	41.57	355	355;359;359	0.0020862	7.2003	NaN	NaN	NaN	1	0	Median	631400	447860	183550	LLLLGTGESGK				770	5104	TRUE	5413	7744	11805	11805			9606;9606;9606
SYF2	Pre-mRNA-splicing factor SYF2	NaN	O95926-2;O95926	O95926-2;O95926	1;1	1;1	1;1	sp|O95926-2|SYF2-2_HUMAN Isoform of O95926, Isoform 2 of Pre-mRNA-splicing factor SYF2 OS=Homo sapiens OX=9606 GN=SYF2 PE=1 SV=1;sp|O95926|SYF2_HUMAN Pre-mRNA-splicing factor SYF2 OS=Homo sapiens OX=9606 GN=SYF2 PE=1 SV=1	2	1	1	1	5.5	5.5	5.5	23.568	201	201;243	0.0020906	7.2026	NaN	NaN	NaN	1	0	Median	715430	379760	335660	LLEISAEDAER				772	5053	TRUE	5362	7672	11706;11707	11707			9606;9606
GOT2	Aspartate aminotransferase, mitochondrial	NaN	P00505-2;P00505	P00505-2;P00505	1;1	1;1	1;1	sp|P00505-2|AATM-2_HUMAN Isoform of P00505, Isoform 2 of Aspartate aminotransferase, mitochondrial OS=Homo sapiens OX=9606 GN=GOT2 PE=1 SV=3;sp|P00505|AATM_HUMAN Aspartate aminotransferase, mitochondrial OS=Homo sapiens OX=9606 GN=GOT2 PE=1 SV=3	2	1	1	1	3.1	3.1	3.1	43.029	387	387;430	0.001443	7.9484	NaN	NaN	NaN	0	0	Median	0	0	0	IAAAILNTPDLR				778	3595	TRUE	3808	5426	8327	8327			9606;9606
COL2A1	Collagen alpha-1(II) chain;Collagen alpha-1(II) chain;Chondrocalcin	NaN	P02458-1;P02458	P02458-1;P02458	1;1	1;1	1;1	sp|P02458-1|CO2A1-1_HUMAN Isoform of P02458, Isoform 1 of Collagen alpha-1(II) chain OS=Homo sapiens OX=9606 GN=COL2A1 PE=1 SV=3;sp|P02458|CO2A1_HUMAN Collagen alpha-1(II) chain OS=Homo sapiens OX=9606 GN=COL2A1 PE=1 SV=3	2	1	1	1	1.5	1.5	1.5	134.39	1418	1418;1487	0.0080545	6.2867	NaN	NaN	NaN	1	0	Median	2301000	1437700	863290	VGPPGSNGNPGPPGPPGPSGK				780	8603	TRUE	9241	13267	20240	20240			9606;9606
KRT6B	Keratin, type II cytoskeletal 6B	NaN	P04259	P04259	26	1	0	sp|P04259|K2C6B_HUMAN Keratin, type II cytoskeletal 6B OS=Homo sapiens OX=9606 GN=KRT6B PE=1 SV=5	1	26	1	0	40.2	3	0	60.066	564	564	0	18.501	NaN	NaN	NaN	0	0	Median	263880	263880	0	ADTLTDEINFLR;AEAESWYQTK;AQYEEIAQR;ATGGGLSSVGGGSSTIK;DVDAAYMNK;EYQELMNVK;FASFIDK;FLEQQNK;GFSANSAR;GSGGLGGACGGAGFGSR;ISIGGGSCAISGGYGSR;KLLEGEECR;LEGLEDALQK;LLEGEECR;NKLEGLEDALQK;NKYEDEINKR;NLDLDSIIAEVK;NMQDLVEDLK;QEIAEINR;SGFSSISVSR;SRAEAESWYQTK;TAAENEFVTLK;TAAENEFVTLKK;WTLLQEQGTK;YEDEINKR;YEELQITAGR				788	183;198;741;845;1473;2428;2454;2590;2952;3274;4145;4391;4704;5050;6157;6164;6178;6251;6604;7149;7474;7685;7686;9266;9324;9330	False;False;False;True;False;False;False;False;False;False;False;False;False;False;False;False;False;False;False;False;False;False;False;False;False;False	194;209;787;900;1576;2583;2584;2610;2756;3138;3473;4398;4661;4992;5359;6632;6639;6655;6736;7124;7695;8050;8268;8269;9943;10006;10012	250;251;252;253;254;278;1108;1109;1255;1256;1257;2235;3683;3684;3685;3719;3720;3910;3911;3912;3913;4445;4446;4924;4925;4926;6262;6263;6655;6656;6657;6658;7132;7667;7668;7669;9429;9430;9431;9432;9433;9434;9435;9449;9450;9451;9452;9453;9454;9455;9456;9474;9475;9476;9477;9589;9590;9591;9592;10171;10970;11510;11822;11823;11824;11825;11826;11827;11828;11829;11830;11831;14261;14262;14263;14264;14265;14…	381;382;383;384;385;415;1662;1663;1880;1881;1882;3392;5651;5652;5653;5654;5707;5708;6008;6009;6010;6011;6836;6837;7557;7558;7559;9632;9633;10213;10214;10215;10216;10906;11700;11701;11702;14345;14346;14347;14348;14349;14350;14351;14352;14370;14371;14372;14373;14374;14375;14376;14377;14412;14413;14414;14415;14574;14575;14576;14577;15518;16690;17502;17981;17982;17983;17984;17985;17986;17987;17988;17…	385;415;1662;1881;3392;5654;5707;6010;6836;7557;9632;10213;10906;11700;14347;14377;14414;14577;15518;16690;17502;17982;17985;21762;21904;21920	200	452	9606
S100A8	Protein S100-A8;Protein S100-A8, N-terminally processed	NaN	P05109	P05109	1	1	1	sp|P05109|S10A8_HUMAN Protein S100-A8 OS=Homo sapiens OX=9606 GN=S100A8 PE=1 SV=1	1	1	1	1	11.8	11.8	11.8	10.834	93	93	0.00075188	11.161	NaN	NaN	NaN	1	1	Median	1868500	712540	1156000	LLETECPQYIR				794	5068	TRUE	5377	7702	11748	11748			9606
ANXA4	Annexin;Annexin A4	NaN	Q6P452;P09525-2;P09525	Q6P452;P09525-2;P09525	1;1;1	1;1;1	1;1;1	tr|Q6P452|Q6P452_HUMAN Isoform of P09525, Annexin OS=Homo sapiens OX=9606 GN=ANXA4 PE=1 SV=1;sp|P09525-2|ANXA4-2_HUMAN Isoform of P09525, Isoform 2 of Annexin A4 OS=Homo sapiens OX=9606 GN=ANXA4 PE=1 SV=4;sp|P09525|ANXA4_HUMAN Annexin A4 OS=Homo sapiens OX	3	1	1	1	3	3	3	33.552	299	299;237;319	0.0097264	6.1379	NaN	NaN	NaN	1	0	Median	374680	220930	153760	AEIDMLDIR				820	228	TRUE	240	322	481	481			9606;9606;9606
SLC25A6	ADP/ATP translocase 3;ADP/ATP translocase 3, N-terminally processed	NaN	P12236	P12236	8	1	1	sp|P12236|ADT3_HUMAN ADP/ATP translocase 3 OS=Homo sapiens OX=9606 GN=SLC25A6 PE=1 SV=4	1	8	1	1	24.2	3	3	32.866	298	298	0.0074813	6.3294	NaN	NaN	NaN	1	0	Median	1508100	937320	570780	EQGVLSFWR;GAWSNVLR;GNLANVIR;LLLQVQHASK;MMMQSGR;QIFLGGVDK;TEQAISFAK;YFPTQALNFAFK				838	2196;2849;3180;5110;5892;6664;7814;9351	False;False;False;False;False;False;True;False	2337;3032;3376;5419;6322;7189;8406;10033	3315;4297;4779;7754;7755;8979;10266;12027;14410	5101;6603;7332;7333;11822;11823;11824;11825;11826;13655;15649;15650;18290;18291;21995	5101;6603;7332;11826;13655;15649;18290;21995			9606
PIP	Prolactin-inducible protein	NaN	P12273	P12273	1	1	1	sp|P12273|PIP_HUMAN Prolactin-inducible protein OS=Homo sapiens OX=9606 GN=PIP PE=1 SV=1	1	1	1	1	7.5	7.5	7.5	16.572	146	146	0.0033135	6.6799	NaN	NaN	NaN	1	1	Median	482340	470720	11617	YTACLCDDNPK				840	9542	TRUE	10238	14698	22447	22447			9606
ACTN1	Alpha-actinin-1	NaN	P12814-2;P12814;P12814-3;P12814-4;H9KV75;H7C5W8	P12814-2;P12814;P12814-3;P12814-4;H9KV75;H7C5W8	8;8;8;8;7;4	2;2;2;2;2;2	2;2;2;2;2;2	sp|P12814-2|ACTN1-2_HUMAN Isoform of P12814, Isoform 2 of Alpha-actinin-1 OS=Homo sapiens OX=9606 GN=ACTN1 PE=1 SV=2;sp|P12814|ACTN1_HUMAN Alpha-actinin-1 OS=Homo sapiens OX=9606 GN=ACTN1 PE=1 SV=2;sp|P12814-3|ACTN1-3_HUMAN Isoform of P12814, Isoform 3 of	6	8	2	2	10.1	2.9	2.9	102.71	887	887;892;914;930;822;297	0	12.249	NaN	NaN	NaN	1	1	Median	198890	135540	63353	ALDFIASK;DLLLDPAWEK;FAIQDISVEETSAK;HTNYTMEHIR;ICDQWDNLGALTQK;LAILGIHNEVSK;LASDLLEWIR;TINEVENQILTR				843	466;1286;2446;3572;3654;4538;4578;7941	False;False;False;False;True;True;False;False	489;1370;2602;3785;3871;4816;4859;8540	684;1949;3711;5397;5511;6884;6940;12214;12215;12216	1031;2942;5695;8287;8463;10533;10630;10631;18593;18594;18595;18596;18597;18598;18599;18600	1031;2942;5695;8287;8463;10533;10630;18599			9606;9606;9606;9606;9606;9606
ALAS1	5-aminolevulinate synthase, nonspecific, mitochondrial	NaN	P13196	P13196	1	1	1	sp|P13196|HEM1_HUMAN 5-aminolevulinate synthase, nonspecific, mitochondrial OS=Homo sapiens OX=9606 GN=ALAS1 PE=1 SV=2	1	1	1	1	2.3	2.3	2.3	70.58	640	640	0.0056568	6.3516	NaN	NaN	NaN	1	0	Median	369740	211550	158190	EVAETSAGPSVVSVK				845	2329	TRUE	2474	3525	5413;5414;5415	5414			9606
P4HA1	Prolyl 4-hydroxylase subunit alpha-1	NaN	P13674-3;P13674-2;P13674	P13674-3;P13674-2;P13674	1;1;1	1;1;1	1;1;1	sp|P13674-3|P4HA1-3_HUMAN Isoform of P13674, Isoform 3 of Prolyl 4-hydroxylase subunit alpha-1 OS=Homo sapiens OX=9606 GN=P4HA1 PE=1 SV=2;sp|P13674-2|P4HA1-2_HUMAN Isoform of P13674, Isoform 2 of Prolyl 4-hydroxylase subunit alpha-1 OS=Homo sapiens OX=9606	3	1	1	1	2.7	2.7	2.7	58.957	516	516;534;534	0.0039088	6.5992	NaN	NaN	NaN	1	0	Median	527620	314790	212830	LQDTYNLDTDTISK				849	5324	TRUE	5652	8075	12307	12307			9606;9606;9606
MSN	Moesin	NaN	P26038	P26038	5	1	1	sp|P26038|MOES_HUMAN Moesin OS=Homo sapiens OX=9606 GN=MSN PE=1 SV=3	1	5	1	1	7.3	1.9	1.9	67.819	577	577	0.0020891	7.2018	NaN	NaN	NaN	1	1	Median	287140	200430	86711	APDFVFYAPR;IGFPWSEIR;KAPDFVFYAPR;KAQQELEEQTR;KPDTIEVQQMK				902	651;3792;4301;4305;4411	False;False;False;True;False	695;4015;4563;4567;4682;4683	967;5719;5720;6515;6519;6682;6683	1456;1457;1458;8798;8799;10027;10031;10245;10246	1457;8798;10027;10031;10245	128	305	9606
YWHAQ	14-3-3 protein theta	NaN	P27348;E9PG15	P27348;E9PG15	3;2	1;1	1;1	sp|P27348|1433T_HUMAN 14-3-3 protein theta OS=Homo sapiens OX=9606 GN=YWHAQ PE=1 SV=1;tr|E9PG15|E9PG15_HUMAN Isoform of P27348, 14-3-3 protein theta (Fragment) OS=Homo sapiens OX=9606 GN=YWHAQ PE=1 SV=1	2	3	1	1	13.1	5.7	5.7	27.764	245	245;149	0.0014296	7.5351	NaN	NaN	NaN	1	0	Median	2029600	1346100	683540	AVTEQGAELSNEER;DSTLIMQLLR;NLLSVAYK				909	963;1437;6207	True;False;False	1026;1538;1539;6685	1439;2183;2184;2185;9513	2159;3308;3309;3310;3311;3312;3313;14460	2159;3309;14460	240	218	9606;9606
RPA1	Replication protein A 70 kDa DNA-binding subunit;Replication protein A 70 kDa DNA-binding subunit, N-terminally processed	NaN	P27694	P27694	1	1	1	sp|P27694|RFA1_HUMAN Replication protein A 70 kDa DNA-binding subunit OS=Homo sapiens OX=9606 GN=RPA1 PE=1 SV=2	1	1	1	1	2.6	2.6	2.6	68.137	616	616	0.0014184	7.4176	NaN	NaN	NaN	1	0	Median	324960	179310	145660	AAGPSLSHTSGGTQSK				911	56	TRUE	61	78	117;118	117			9606
LAP3	Cytosol aminopeptidase	NaN	P28838-2;P28838	P28838-2;P28838	1;1	1;1	1;1	sp|P28838-2|AMPL-2_HUMAN Isoform of P28838, Isoform 2 of Cytosol aminopeptidase OS=Homo sapiens OX=9606 GN=LAP3 PE=1 SV=3;sp|P28838|AMPL_HUMAN Cytosol aminopeptidase OS=Homo sapiens OX=9606 GN=LAP3 PE=1 SV=3	2	1	1	1	2.5	2.5	2.5	52.771	488	488;519	0.0079853	6.2302	NaN	NaN	NaN	1	0	Median	258680	182090	76583	TIQVDNTDAEGR				917	7947	TRUE	8546	12226	18614	18614			9606;9606
EPHA2	Ephrin type-A receptor 2	NaN	P29317	P29317	1	1	1	sp|P29317|EPHA2_HUMAN Ephrin type-A receptor 2 OS=Homo sapiens OX=9606 GN=EPHA2 PE=1 SV=2	1	1	1	1	1	1	1	108.27	976	976	0.0091352	6.1595	NaN	NaN	NaN	1	0	Median	247380	180440	66934	FADIVSILDK				918	2440	TRUE	2596	3705	5685	5685			9606
PRDX3	Thioredoxin-dependent peroxide reductase, mitochondrial	NaN	P30048-2;P30048	P30048-2;P30048	1;1	1;1	1;1	sp|P30048-2|PRDX3-2_HUMAN Isoform of P30048, Isoform 2 of Thioredoxin-dependent peroxide reductase, mitochondrial OS=Homo sapiens OX=9606 GN=PRDX3 PE=1 SV=3;sp|P30048|PRDX3_HUMAN Thioredoxin-dependent peroxide reductase, mitochondrial OS=Homo sapiens OX=96	2	1	1	1	5	5	5	25.838	238	238;256	0.0020833	7.1863	NaN	NaN	NaN	1	0	Median	391340	277710	113630	GLFIIDPNGVIK				922	3110	TRUE	3304	4683	7189;7190	7189			9606;9606
PEBP1	Phosphatidylethanolamine-binding protein 1;Hippocampal cholinergic neurostimulating peptide	NaN	P30086	P30086	1	1	1	sp|P30086|PEBP1_HUMAN Phosphatidylethanolamine-binding protein 1 OS=Homo sapiens OX=9606 GN=PEBP1 PE=1 SV=3	1	1	1	1	7.5	7.5	7.5	21.057	187	187	0.0014055	7.2765	NaN	NaN	NaN	1	1	Median	215440	160990	54453	LYTLVLTDPDAPSR				924	5706	TRUE	6048	8612	13112	13112			9606
LCN1;LCN1P1	Lipocalin-1;Putative lipocalin 1-like protein 1	NaN	P31025;Q5VSP4	P31025;Q5VSP4	2;1	2;1	2;1	sp|P31025|LCN1_HUMAN Lipocalin-1 OS=Homo sapiens OX=9606 GN=LCN1 PE=1 SV=1;sp|Q5VSP4|LC1L1_HUMAN Putative lipocalin 1-like protein 1 OS=Homo sapiens OX=9606 GN=LCN1P1 PE=5 SV=1	2	2	2	2	10.8	10.8	10.8	19.25	176	176;162	0	15.077	NaN	NaN	NaN	1	1	Median	3199800	3089500	110280	GLSTESILIPR;VTMLISGR				930	3148;9082	True;True	3343;9750	4738;13980	7273;21339	7273;21339			9606;9606
S100A7	Protein S100-A7	NaN	P31151	P31151	1	1	1	sp|P31151|S10A7_HUMAN Protein S100-A7 OS=Homo sapiens OX=9606 GN=S100A7 PE=1 SV=4	1	1	1	1	10.9	10.9	10.9	11.471	101	101	0.002027	6.8191	NaN	NaN	NaN	1	1	Median	587130	565770	21365	GTNYLADVFEK				931	3320	TRUE	3522	5006	7685	7685			9606
SDC4	Syndecan-4	NaN	P31431	P31431	1	1	1	sp|P31431|SDC4_HUMAN Syndecan-4 OS=Homo sapiens OX=9606 GN=SDC4 PE=1 SV=2	1	1	1	1	6.6	6.6	6.6	21.641	198	198	1	-2	NaN	NaN	NaN	0	0	Median	617100	0	617100	MKKKDEGSYDLGK	+			933	5851	TRUE	6261	8895	13540	13540	593	172	9606
UQCRC1	Cytochrome b-c1 complex subunit 1, mitochondrial	NaN	P31930	P31930	1	1	1	sp|P31930|QCR1_HUMAN Cytochrome b-c1 complex subunit 1, mitochondrial OS=Homo sapiens OX=9606 GN=UQCRC1 PE=1 SV=3	1	1	1	1	2.1	2.1	2.1	52.645	480	480	0.0080247	6.2744	NaN	NaN	NaN	1	0	Median	710060	488470	221580	IAEVDASVVR				935	3610	TRUE	3823	5443	8354	8354			9606
SHMT1	Serine hydroxymethyltransferase, cytosolic	NaN	P34896-4;P34896-2;P34896	P34896-4;P34896-2;P34896	1;1;1	1;1;1	1;1;1	sp|P34896-4|GLYC-4_HUMAN Isoform of P34896, Isoform 4 of Serine hydroxymethyltransferase, cytosolic OS=Homo sapiens OX=9606 GN=SHMT1 PE=1 SV=1;sp|P34896-2|GLYC-2_HUMAN Isoform of P34896, Isoform 2 of Serine hydroxymethyltransferase, cytosolic OS=Homo sapie	3	1	1	1	3.5	3.5	3.5	37.672	345	345;444;483	0.0020747	7.1081	NaN	NaN	NaN	1	0	Median	339470	205350	134120	ALSEALTELGYK				945	564	TRUE	599	833	1252	1252			9606;9606;9606
SOX6	Transcription factor SOX-6	NaN	P35712-4;P35712-2;P35712	P35712-4;P35712-2;P35712	1;1;1	1;1;1	1;1;1	sp|P35712-4|SOX6-4_HUMAN Isoform of P35712, Isoform 4 of Transcription factor SOX-6 OS=Homo sapiens OX=9606 GN=SOX6 PE=1 SV=3;sp|P35712-2|SOX6-2_HUMAN Isoform of P35712, Isoform 2 of Transcription factor SOX-6 OS=Homo sapiens OX=9606 GN=SOX6 PE=1 SV=3;sp|P	3	1	1	1	1	1	1	88.987	801	801;804;828	1	-2	NaN	NaN	NaN	0	0	Median	104680	104680	0	AMNGSAAK	+			957	614	TRUE	653	911	1367	1367	620	555	9606;9606;9606
TRIM23	E3 ubiquitin-protein ligase TRIM23	NaN	P36406-3;P36406-2;P36406	P36406-3;P36406-2;P36406	1;1;1	1;1;1	1;1;1	sp|P36406-3|TRI23-3_HUMAN Isoform of P36406, Isoform Gamma of E3 ubiquitin-protein ligase TRIM23 OS=Homo sapiens OX=9606 GN=TRIM23 PE=1 SV=1;sp|P36406-2|TRI23-2_HUMAN Isoform of P36406, Isoform Beta of E3 ubiquitin-protein ligase TRIM23 OS=Homo sapiens OX=	3	1	1	1	1.8	1.8	1.8	61.068	546	546;569;574	0.0038911	6.5534	NaN	NaN	NaN	1	0	Median	86793	57275	29517	DALLLIFANK				960	1058	TRUE	1126	1611	2438	2438			9606;9606;9606
TAGLN2	Transgelin-2	NaN	X6RJP6;P37802;P37802-2	X6RJP6;P37802;P37802-2	1;1;1	1;1;1	1;1;1	tr|X6RJP6|X6RJP6_HUMAN Isoform of P37802, Transgelin-2 (Fragment) OS=Homo sapiens OX=9606 GN=TAGLN2 PE=1 SV=1;sp|P37802|TAGL2_HUMAN Transgelin-2 OS=Homo sapiens OX=9606 GN=TAGLN2 PE=1 SV=3;sp|P37802-2|TAGL2-2_HUMAN Isoform of P37802, Isoform 2 of Transgeli	3	1	1	1	5.9	5.9	5.9	21.086	187	187;199;220	0.0080595	6.2923	NaN	NaN	NaN	1	0	Median	314470	201440	113030	NFSDNQLQEGK				966	6102	TRUE	6575	9339	14198	14198			9606;9606;9606
NCAPD3	Condensin-2 complex subunit D3	NaN	P42695	P42695	1	1	1	sp|P42695|CNDD3_HUMAN Condensin-2 complex subunit D3 OS=Homo sapiens OX=9606 GN=NCAPD3 PE=1 SV=2	1	1	1	1	1.3	1.3	1.3	168.89	1498	1498	0.0014524	8.0589	NaN	NaN	NaN	1	0	Median	396200	265870	130330	ASAGHVAVSSPTPETGPLQR				985	748	TRUE	794	1117	1673	1673			9606
NAMPT	Nicotinamide phosphoribosyltransferase	NaN	P43490	P43490	2	2	2	sp|P43490|NAMPT_HUMAN Nicotinamide phosphoribosyltransferase OS=Homo sapiens OX=9606 GN=NAMPT PE=1 SV=1	1	2	2	2	5.3	5.3	5.3	55.52	491	491	0	13.796	NaN	NaN	NaN	1	1	Median	767550	526510	241040	NAQLNIELEAAHH;TPAGNFVTLEEGK				989	6025;8087	True;True	6496;8697	9212;12472	13997;18969	13997;18969			9606
RPIA	Ribose-5-phosphate isomerase	NaN	P49247	P49247	1	1	1	sp|P49247|RPIA_HUMAN Ribose-5-phosphate isomerase OS=Homo sapiens OX=9606 GN=RPIA PE=1 SV=3	1	1	1	1	6.1	6.1	6.1	33.269	311	311	0	13.378	NaN	NaN	NaN	1	1	Median	898030	717200	180820	NNQVLGIGSGSTIVHAVQR				1006	6270	TRUE	6761	9644	14658;14659	14658			9606
LMAN1	Protein ERGIC-53	NaN	P49257	P49257	1	1	1	sp|P49257|LMAN1_HUMAN Protein ERGIC-53 OS=Homo sapiens OX=9606 GN=LMAN1 PE=1 SV=2	1	1	1	1	2.4	2.4	2.4	57.548	510	510	0.0033179	6.6875	NaN	NaN	NaN	0	0	Median	0	0	0	YVSSLTEEISKR				1007	9568	TRUE	10265	14738	22508	22508			9606
PRIM2	DNA primase large subunit	NaN	P49643	P49643	1	1	1	sp|P49643|PRI2_HUMAN DNA primase large subunit OS=Homo sapiens OX=9606 GN=PRIM2 PE=1 SV=2	1	1	1	1	2.9	2.9	2.9	58.805	509	509	0.0033156	6.6868	NaN	NaN	NaN	1	0	Median	337400	173680	163720	EQEIVASSPSLSGLK				1014	2188	TRUE	2329	3305	5087;5088	5088			9606
ANXA11	Annexin A11	NaN	P50995-2;P50995	P50995-2;P50995	1;1	1;1	1;1	sp|P50995-2|ANX11-2_HUMAN Isoform of P50995, Isoform 2 of Annexin A11 OS=Homo sapiens OX=9606 GN=ANXA11 PE=1 SV=1;sp|P50995|ANX11_HUMAN Annexin A11 OS=Homo sapiens OX=9606 GN=ANXA11 PE=1 SV=1	2	1	1	1	2.3	2.3	2.3	51.242	472	472;505	0.0020661	7.0529	NaN	NaN	NaN	1	0	Median	297760	209100	88661	TPVLFDIYEIK				1027	8123	TRUE	8733	12528	19062;19063	19063			9606;9606
HNRNPA3	Heterogeneous nuclear ribonucleoprotein A3	NaN	P51991-2	P51991-2	8	1	1	sp|P51991-2|ROA3-2_HUMAN Isoform of P51991, Isoform 2 of Heterogeneous nuclear ribonucleoprotein A3 OS=Homo sapiens OX=9606 GN=HNRNPA3 PE=1 SV=2	1	8	1	1	27.2	3.7	3.7	37.029	356	356	0.0033201	6.688	NaN	NaN	NaN	1	0	Median	1110800	811920	298900	EDSVKPGAHLTVK;EDTEEYNLR;IETIEVMEDR;IFVGGIKEDTEEYNLR;MEGHDPKEPEQLR;SSGSPYGGGYGSGGGSGGYGSR;WGTLTDCVVMR;YHTINGHNCEVK				1034	1725;1726;3739;3772;5777;7506;9249;9389	False;False;False;False;True;False;False;False	1843;1844;3960;3995;6150;8082;9925;9926;10072	2647;2648;2649;5640;5641;5642;5695;8737;11553;11554;14240;14241;14462	4040;4041;4042;4043;4044;4045;8666;8667;8668;8669;8759;8760;8761;8762;13308;17577;17578;17579;17580;21723;21724;21725;21726;21727;22072	4041;4044;8668;8761;13308;17578;21724;22072	694;696;697	1;45;136	9606
		NaN	P53367-2	P53367-2	1	1	1	sp|P53367-2|ARFP1-2_HUMAN Isoform of P53367, Isoform A of Arfaptin-1 OS=Homo sapiens OX=9606 GN=ARFIP1 PE=1 SV=2	1	1	1	1	4.1	4.1	4.1	38.598	341	341	0.0032895	6.6476	NaN	NaN	NaN	1	0	Median	332430	209550	122880	EGVIEAGAFQGGQR				1040	1880	TRUE	2008	2868	4389	4389			9606
MFAP1	Microfibrillar-associated protein 1	NaN	P55081	P55081	1	1	1	sp|P55081|MFAP1_HUMAN Microfibrillar-associated protein 1 OS=Homo sapiens OX=9606 GN=MFAP1 PE=1 SV=2	1	1	1	1	3	3	3	51.958	439	439	0.0014567	8.0991	NaN	NaN	NaN	1	0	Median	1299100	649720	649430	DFSAPTLEDHFNK				1050	1147	TRUE	1221	1745	2637;2638	2637			9606
BID	BH3-interacting domain death agonist;BH3-interacting domain death agonist p15;BH3-interacting domain death agonist p13;BH3-interacting domain death agonist p11	NaN	P55957;P55957-2	P55957;P55957-2	1;1	1;1	1;1	sp|P55957|BID_HUMAN BH3-interacting domain death agonist OS=Homo sapiens OX=9606 GN=BID PE=1 SV=1;sp|P55957-2|BID-2_HUMAN Isoform of P55957, Isoform 2 of BH3-interacting domain death agonist OS=Homo sapiens OX=9606 GN=BID PE=1 SV=1	2	1	1	1	6.7	6.7	6.7	21.994	195	195;241	0.0014674	8.8439	NaN	NaN	NaN	1	0	Median	746530	494810	251720	IEADSESQEDIIR				1055	3694	TRUE	3913	5569	8547;8548	8548			9606;9606
RAB25	Ras-related protein Rab-25	NaN	P57735	P57735	1	1	1	sp|P57735|RAB25_HUMAN Ras-related protein Rab-25 OS=Homo sapiens OX=9606 GN=RAB25 PE=1 SV=2	1	1	1	1	5.2	5.2	5.2	23.495	213	213	0.0079706	6.2179	NaN	NaN	NaN	1	0	Median	211830	117300	94526	VVLIGESGVGK				1060	9151	TRUE	9824	14080	21487	21487			9606
SEC61B	Protein transport protein Sec61 subunit beta	NaN	S4R3B5;P60468	S4R3B5;P60468	1;1	1;1	1;1	tr|S4R3B5|S4R3B5_HUMAN Isoform of P60468, Protein transport protein Sec61 subunit beta OS=Homo sapiens OX=9606 GN=SEC61B PE=1 SV=1;sp|P60468|SC61B_HUMAN Protein transport protein Sec61 subunit beta OS=Homo sapiens OX=9606 GN=SEC61B PE=1 SV=2	2	1	1	1	23.8	23.8	23.8	4.8738	42	42;96	0.0032916	6.6488	NaN	NaN	NaN	1	0	Median	2150700	1259400	891300	FYTEDSPGLK				1064	2791	TRUE	2971	4208	6455;6456	6456			9606;9606
RAB14	Ras-related protein Rab-14	NaN	X6RFL8;P61106	X6RFL8;P61106	1;1	1;1	1;1	tr|X6RFL8|X6RFL8_HUMAN Isoform of P61106, Ras-related protein Rab-14 (Fragment) OS=Homo sapiens OX=9606 GN=RAB14 PE=1 SV=1;sp|P61106|RAB14_HUMAN Ras-related protein Rab-14 OS=Homo sapiens OX=9606 GN=RAB14 PE=1 SV=4	2	1	1	1	7.7	7.7	7.7	20.409	181	181;215	0.0014535	8.0615	NaN	NaN	NaN	1	0	Median	240500	143830	96672	TGENVEDAFLEAAK				1069	7858	TRUE	8453	12091	18399;18400	18400			9606;9606
MAGOH;MAGOHB	Protein mago nashi homolog	NaN	P61326;P61326-2;F5H6P7	P61326;P61326-2;F5H6P7	4;4;2	1;1;0	1;1;0	sp|P61326|MGN_HUMAN Protein mago nashi homolog OS=Homo sapiens OX=9606 GN=MAGOH PE=1 SV=1;sp|P61326-2|MGN-2_HUMAN Isoform of P61326, Isoform 2 of Protein mago nashi homolog OS=Homo sapiens OX=9606 GN=MAGOH PE=1 SV=1;tr|F5H6P7|F5H6P7_HUMAN Isoform of Q96A72	3	4	1	1	25.3	5.5	5.5	17.163	146	146;109;102	1	-2	NaN	NaN	NaN	1	0	Median	899230	531940	367290	IGSLIDVNQSK;MESDFYLR;VFYYLVQDLK;YANNSNYK	+			1075	3818;5787;8568;9287	False;True;False;False	4042;6161;9205;9965	5761;8751;13211;14294	8859;8860;13326;20151;20152;21817;21818	8860;13326;20152;21818	755	1	9606;9606;9606
RPL39P5;RPL39	Putative 60S ribosomal protein L39-like 5;60S ribosomal protein L39	NaN	Q59GN2;P62891	Q59GN2;P62891	1;1	1;1	1;1	sp|Q59GN2|R39L5_HUMAN Putative 60S ribosomal protein L39-like 5 OS=Homo sapiens OX=9606 GN=RPL39P5 PE=5 SV=2;sp|P62891|RL39_HUMAN 60S ribosomal protein L39 OS=Homo sapiens OX=9606 GN=RPL39 PE=1 SV=2	2	1	1	1	19.6	19.6	19.6	6.3225	51	51;51	0.0020718	7.1006	NaN	NaN	NaN	1	0	Median	9394400	5066900	4327500	QNRPIPQWIR				1107	6742	TRUE	7269	10381	15815;15816	15815			9606;9606
ACTG1	Actin, cytoplasmic 2;Actin, cytoplasmic 2, N-terminally processed	NaN	P63261;I3L3I0;I3L1U9;K7EM38;I3L3R2;J3KT65;I3L4N8	P63261;I3L3I0;I3L1U9;K7EM38;I3L3R2;J3KT65;I3L4N8	16;11;11;9;9;9;9	1;1;1;1;1;1;1	1;1;1;1;1;1;1	sp|P63261|ACTG_HUMAN Actin, cytoplasmic 2 OS=Homo sapiens OX=9606 GN=ACTG1 PE=1 SV=1;tr|I3L3I0|I3L3I0_HUMAN Isoform of P63261, Actin, cytoplasmic 2 (Fragment) OS=Homo sapiens OX=9606 GN=ACTG1 PE=1 SV=1;tr|I3L1U9|I3L1U9_HUMAN Isoform of P63261, Actin, cytop	7	16	1	1	51.2	4.5	4.5	41.792	375	375;214;214;133;164;198;241	0.001442	7.9234	NaN	NaN	NaN	1	0	Median	503010	306500	196510	AGFAGDDAPR;AVFPSIVGR;AVFPSIVGRPR;DLTDYLMK;DSYVGDEAQSK;EEEIAALVIDNGSGMCK;EITALAPSTMK;GYSFTTTAER;HQGVMVGMGQK;IIAPPER;IWHHTFYNELR;KDLYANTVLSGGTTMYPGIADR;QEYDESGPSIVHR;SYELPDGQVITIGNER;VAPEEHPVLLTEAPLNPK;YPIEHGIVTNWDDMEK				1119	312;915;916;1317;1443;1744;1953;3420;3551;3851;4262;4314;6618;7665;8395;9497	False;False;False;False;False;True;False;False;False;False;False;False;False;False;False;False	329;973;974;1405;1406;1545;1862;2083;2084;3625;3762;3763;3764;4077;4523;4578;7139;8246;9020;10192	451;452;453;1363;1364;1365;1366;1367;1994;1995;2191;2674;2974;2975;2976;2977;5156;5157;5158;5355;5356;5357;5358;5359;5360;5809;6454;6533;10190;10191;10192;10193;11766;11767;11768;11769;11770;12936;12937;12938;12939;14640	676;677;678;679;680;681;2043;2044;2045;2046;2047;2048;2049;2050;3012;3013;3014;3323;3324;3325;4084;4550;4551;4552;4553;4554;4555;7925;7926;7927;7928;7929;7930;8207;8208;8209;8210;8211;8212;8213;8214;8215;8216;8217;8928;9930;9931;10050;10051;10052;10053;15544;15545;15546;15547;17900;17901;17902;17903;17904;17905;17906;17907;17908;17909;17910;19688;19689;19690;19691;19692;19693;19694;19695;19696;22…	680;2043;2048;3014;3325;4084;4555;7929;8216;8928;9930;10053;15547;17906;19693;22354	729;730;731;732;733;734;794	16;44;47;82;190;305;325	9606;9606;9606;9606;9606;9606;9606
TUBA1B	Tubulin alpha-1B chain	NaN	P68363;P68363-2	P68363;P68363-2	16;12	1;1	0;0	sp|P68363|TBA1B_HUMAN Tubulin alpha-1B chain OS=Homo sapiens OX=9606 GN=TUBA1B PE=1 SV=1;sp|P68363-2|TBA1B-2_HUMAN Isoform of P68363, Isoform 2 of Tubulin alpha-1B chain OS=Homo sapiens OX=9606 GN=TUBA1B PE=1 SV=1	2	16	1	0	40.8	2.9	0	50.151	451	451;335	1	-2	NaN	NaN	NaN	0	0	Median	0	0	0	AVCMLSNTTAIAEAWAR;AVFVDLEPTVIDEVR;DVNAAIATIK;EDAANNYAR;EDMAALEK;EIIDLVLDR;FDLMYAK;GHYTIGK;IHFPLATYAPVISAEK;NLDIERPTYTNLNR;PTYTNLNR;QLFHPEQLITGK;SIQFVDWCPTGFK;TIGGGDDSFNTFFSETGAGK;VGINYQPPTVVPGGDLAK;YMACCLLYR	+			1123	900;917;1497;1684;1714;1930;2478;3027;3834;6176;6538;6700;7231;7930;8592;9466	False;False;False;False;False;False;False;False;False;False;False;False;True;False;False;False	956;975;1600;1799;1832;2060;2636;2637;3218;4059;6653;7052;7226;7785;8529;9229;10154	1340;1341;1368;2268;2269;2270;2271;2272;2273;2274;2275;2560;2561;2562;2563;2564;2626;2627;2940;2941;2942;2943;2944;2945;3751;3752;3753;3754;3755;4564;5783;5784;5785;5786;9471;9472;10078;10317;10318;10319;10320;10321;10322;10323;11100;12198;12199;13244;13245;13246;13247;13248;13249;13250;14581	2008;2009;2051;2052;2053;3441;3442;3443;3444;3445;3446;3447;3448;3449;3450;3451;3452;3453;3902;3903;3904;3905;3906;3907;3908;3909;4005;4006;4007;4496;4497;4498;4499;4500;4501;4502;5759;5760;5761;5762;5763;5764;7014;8891;8892;8893;8894;8895;8896;8897;8898;8899;14405;14406;14407;14408;14409;14410;15372;15720;15721;15722;15723;15724;15725;15726;15727;15728;15729;15730;15731;15732;16880;18562;18563;1…	2008;2053;3450;3905;4007;4498;5763;7014;8896;14405;15372;15729;16880;18565;20206;22269	262;798	377;398	9606;9606
PIP4K2B	Phosphatidylinositol 5-phosphate 4-kinase type-2 beta	NaN	P78356;P78356-2	P78356;P78356-2	2;1	1;1	1;1	sp|P78356|PI42B_HUMAN Phosphatidylinositol 5-phosphate 4-kinase type-2 beta OS=Homo sapiens OX=9606 GN=PIP4K2B PE=1 SV=1;sp|P78356-2|PI42B-2_HUMAN Isoform of P78356, Isoform 2 of Phosphatidylinositol 5-phosphate 4-kinase type-2 beta OS=Homo sapiens OX=9606	2	2	1	1	6.5	2.4	2.4	47.377	416	416;281	0.003283	6.6375	NaN	NaN	NaN	1	0	Median	2454400	1385600	1068800	DNDFLNEGQK;HGAGAEISTVNPEQYSK				1128	1334;3464	True;False	1427;3670	2030;5225	3068;8026	3068;8026			9606;9606
SRPK2	SRSF protein kinase 2;SRSF protein kinase 2 N-terminal;SRSF protein kinase 2 C-terminal	NaN	P78362-2;P78362;H7C5L6	P78362-2;P78362;H7C5L6	3;3;2	1;1;1	1;1;1	sp|P78362-2|SRPK2-2_HUMAN Isoform of P78362, Isoform 2 of SRSF protein kinase 2 OS=Homo sapiens OX=9606 GN=SRPK2 PE=1 SV=3;sp|P78362|SRPK2_HUMAN SRSF protein kinase 2 OS=Homo sapiens OX=9606 GN=SRPK2 PE=1 SV=3;tr|H7C5L6|H7C5L6_HUMAN Isoform of P78362, SRSF	3	3	1	1	4.1	1.7	1.7	79.028	699	699;688;295	0.0014235	7.4378	NaN	NaN	NaN	1	0	Median	691050	428300	262740	AADLLVNPLDPR;HFTEDIQTR;IGDLFNGR				1129	35;3461;3784	True;False;False	40;3667;4007	52;5221;5222;5710	78;8019;8020;8021;8022;8782	78;8022;8782			9606;9606;9606
GSTO1	Glutathione S-transferase omega-1	NaN	Q5TA01;Q5TA02;P78417-2;P78417-3;P78417	Q5TA01;Q5TA02;P78417-2;P78417-3;P78417	1;1;1;1;1	1;1;1;1;1	1;1;1;1;1	tr|Q5TA01|Q5TA01_HUMAN Isoform of P78417, Glutathione S-transferase omega-1 (Fragment) OS=Homo sapiens OX=9606 GN=GSTO1 PE=1 SV=1;tr|Q5TA02|Q5TA02_HUMAN Isoform of P78417, Glutathione S-transferase omega-1 (Fragment) OS=Homo sapiens OX=9606 GN=GSTO1 PE=1 S	5	1	1	1	5	5	5	20.938	180	180;200;208;213;241	0.0056639	6.3609	NaN	NaN	NaN	1	0	Median	964400	374380	590020	HEVININLK				1131	3454	TRUE	3660	5210	8006	8006			9606;9606;9606;9606;9606
NKX6-1	Homeobox protein Nkx-6.1	NaN	P78426	P78426	1	1	1	sp|P78426|NKX61_HUMAN Homeobox protein Nkx-6.1 OS=Homo sapiens OX=9606 GN=NKX6-1 PE=1 SV=2	1	1	1	1	3	3	3	37.849	367	367	1	-2	NaN	NaN	NaN	0	0	Median	0	0	0	MLAVGAMEGTR	+			1132	5857	TRUE	6267	8902	13551	13551	806;807	1;7	9606
MRPS21	28S ribosomal protein S21, mitochondrial	NaN	P82921	P82921	1	1	1	sp|P82921|RT21_HUMAN 28S ribosomal protein S21, mitochondrial OS=Homo sapiens OX=9606 GN=MRPS21 PE=1 SV=3	1	1	1	1	16.1	16.1	16.1	10.688	87	87	0.0020408	6.887	NaN	NaN	NaN	1	0	Median	295620	200020	95593	TVMVQEGNVESAYR				1135	8283	TRUE	8902	12761	19415;19416;19417	19417			9606
ERH	Enhancer of rudimentary homolog	NaN	P84090	P84090	1	1	1	sp|P84090|ERH_HUMAN Enhancer of rudimentary homolog OS=Homo sapiens OX=9606 GN=ERH PE=1 SV=1	1	1	1	1	10.6	10.6	10.6	12.259	104	104	0.0013996	7.2222	NaN	NaN	NaN	1	0	Median	1303300	730850	572450	ADTQTYQPYNK				1138	185	TRUE	196	256	388	388			9606
RBM3	RNA-binding protein 3	NaN	P98179	P98179	1	1	1	sp|P98179|RBM3_HUMAN RNA-binding protein 3 OS=Homo sapiens OX=9606 GN=RBM3 PE=1 SV=1	1	1	1	1	6.4	6.4	6.4	17.17	157	157	1	-2	NaN	NaN	NaN	1	0	Median	438220	279940	158280	AMNGESLDGR	+			1142	613	TRUE	652	910	1366	1366	820	67	9606
TIAL1	Nucleolysin TIAR	NaN	Q01085;Q01085-2	Q01085;Q01085-2	1;1	1;1	1;1	sp|Q01085|TIAR_HUMAN Nucleolysin TIAR OS=Homo sapiens OX=9606 GN=TIAL1 PE=1 SV=1;sp|Q01085-2|TIAR-2_HUMAN Isoform of Q01085, Isoform 2 of Nucleolysin TIAR OS=Homo sapiens OX=9606 GN=TIAL1 PE=1 SV=1	2	1	1	1	2.9	2.9	2.9	41.59	375	375;392	0.0014225	7.4358	NaN	NaN	NaN	1	1	Median	864610	571570	293040	FEDVVNQSSPK				1147	2494	TRUE	2653	3774	5799	5799			9606;9606
SLC7A5	Large neutral amino acids transporter small subunit 1	NaN	Q01650	Q01650	2	2	2	sp|Q01650|LAT1_HUMAN Large neutral amino acids transporter small subunit 1 OS=Homo sapiens OX=9606 GN=SLC7A5 PE=1 SV=2	1	2	2	2	6.7	6.7	6.7	55.01	507	507	0	13.426	NaN	NaN	NaN	1	0	Median	303030	229760	73265	GDVSNLDPNFSFEGTK;SADGSAPAGEGEGVTLQR				1152	2886;6935	True;True	3069;7469	4344;10682;10683	6676;16246;16247	6676;16246			9606
PFKP	ATP-dependent 6-phosphofructokinase, platelet type	NaN	Q01813;B1APP6;Q01813-2	Q01813;B1APP6;Q01813-2	2;1;1	1;1;1	1;1;1	sp|Q01813|PFKAP_HUMAN ATP-dependent 6-phosphofructokinase, platelet type OS=Homo sapiens OX=9606 GN=PFKP PE=1 SV=2;tr|B1APP6|B1APP6_HUMAN Isoform of Q01813, ATP-dependent 6-phosphofructokinase, platelet type OS=Homo sapiens OX=9606 GN=PFKP PE=1 SV=2;sp|Q01	3	2	1	1	3.7	1.3	1.3	85.595	784	784;568;776	1	-2	NaN	NaN	NaN	1	0	Median	741110	481460	259660	AIGVLTSGGDAQGMNAAVR;SFAGNLNTYK	+			1154	400;7107	False;True	419;420;7651	577;578;579;10912	865;866;867;868;16600	866;16600	550	39	9606;9606;9606
MAP2K1	Dual specificity mitogen-activated protein kinase kinase 1	NaN	Q02750-2;Q02750	Q02750-2;Q02750	2;2	2;2	2;2	sp|Q02750-2|MP2K1-2_HUMAN Isoform of Q02750, Isoform 2 of Dual specificity mitogen-activated protein kinase kinase 1 OS=Homo sapiens OX=9606 GN=MAP2K1 PE=1 SV=2;sp|Q02750|MP2K1_HUMAN Dual specificity mitogen-activated protein kinase kinase 1 OS=Homo sapien	2	2	2	2	6.8	6.8	6.8	40.763	367	367;393	0	12.314	NaN	NaN	NaN	1	1	Median	314630	141250	173380	ISELGAGNGGVVFK;VGELKDDDFEK				1156	4138;8578	True;True	4390;9215	6249;13226	9608;20174	9608;20174			9606;9606
DSC1	Desmocollin-1	NaN	Q08554-2;Q08554	Q08554-2;Q08554	1;1	1;1	1;1	sp|Q08554-2|DSC1-2_HUMAN Isoform of Q08554, Isoform 1B of Desmocollin-1 OS=Homo sapiens OX=9606 GN=DSC1 PE=1 SV=2;sp|Q08554|DSC1_HUMAN Desmocollin-1 OS=Homo sapiens OX=9606 GN=DSC1 PE=1 SV=2	2	1	1	1	1.8	1.8	1.8	93.834	840	840;894	0.0032723	6.6202	NaN	NaN	NaN	1	1	Median	1120200	1100700	19511	VTATDLDEPDTLHTR				1173	9057	TRUE	9723	13942	21283	21283			9606;9606
AP1B1	AP-1 complex subunit beta-1	NaN	Q10567-4;Q10567-3;Q10567-2;Q10567	Q10567-4;Q10567-3;Q10567-2;Q10567	4;4;4;4	1;1;1;1	1;1;1;1	sp|Q10567-4|AP1B1-4_HUMAN Isoform of Q10567, Isoform 4 of AP-1 complex subunit beta-1 OS=Homo sapiens OX=9606 GN=AP1B1 PE=1 SV=2;sp|Q10567-3|AP1B1-3_HUMAN Isoform of Q10567, Isoform C of AP-1 complex subunit beta-1 OS=Homo sapiens OX=9606 GN=AP1B1 PE=1 SV=	4	4	1	1	5	1.2	1.2	101.35	919	919;939;942;949	1	-2	NaN	NaN	NaN	1	0	Median	537930	374630	163300	LQSSNIFTVAK;LSHANSAVVLSAVK;NINLIVQK;NVEGQDMLYQSLK	+			1179	5391;5442;6144;6402	True;False;False;False	5721;5772;6619;6910	8166;8227;8228;9409;9873	12444;12533;12534;14311;14312;15039	12444;12533;14312;15039	42	868	9606;9606;9606;9606
STRN3	Striatin-3	NaN	Q13033-2;Q13033	Q13033-2;Q13033	1;1	1;1	1;1	sp|Q13033-2|STRN3-2_HUMAN Isoform of Q13033, Isoform Alpha of Striatin-3 OS=Homo sapiens OX=9606 GN=STRN3 PE=1 SV=3;sp|Q13033|STRN3_HUMAN Striatin-3 OS=Homo sapiens OX=9606 GN=STRN3 PE=1 SV=3	2	1	1	1	1.8	1.8	1.8	77.744	713	713;797	0.0080745	6.3079	NaN	NaN	NaN	1	0	Median	616090	249850	366230	AYIASAGADALAK				1189	995	TRUE	1059	1493	2250	2250			9606;9606
MDC1	Mediator of DNA damage checkpoint protein 1	NaN	Q14676-3;Q14676-2;Q14676	Q14676-3;Q14676-2;Q14676	1;1;1	1;1;1	1;1;1	sp|Q14676-3|MDC1-3_HUMAN Isoform of Q14676, Isoform 3 of Mediator of DNA damage checkpoint protein 1 OS=Homo sapiens OX=9606 GN=MDC1 PE=1 SV=3;sp|Q14676-2|MDC1-2_HUMAN Isoform of Q14676, Isoform 2 of Mediator of DNA damage checkpoint protein 1 OS=Homo sapi	3	1	1	1	1.4	1.4	1.4	195.98	1802	1802;1825;2089	0.00073964	9.6122	NaN	NaN	NaN	1	0	Median	223340	134970	88368	TPEPVVPTAPEPHPTTSTDQPVTPK				1237	8100	TRUE	8710	12488	18991	18991			9606;9606;9606
WTAP	Pre-mRNA-splicing regulator WTAP	NaN	Q15007	Q15007	1	1	1	sp|Q15007|FL2D_HUMAN Pre-mRNA-splicing regulator WTAP OS=Homo sapiens OX=9606 GN=WTAP PE=1 SV=2	1	1	1	1	3.8	3.8	3.8	44.243	396	396	0.0014094	7.3296	NaN	NaN	NaN	1	0	Median	166400	83412	82983	TTASEPVEQSEATSK				1247	8202	TRUE	8815	12637	19216;19217	19216			9606
SART3	Squamous cell carcinoma antigen recognized by T-cells 3	NaN	Q15020-4;Q15020	Q15020-4;Q15020	6;6	1;1	1;1	sp|Q15020-4|SART3-4_HUMAN Isoform of Q15020, Isoform 4 of Squamous cell carcinoma antigen recognized by T-cells 3 OS=Homo sapiens OX=9606 GN=SART3 PE=1 SV=1;sp|Q15020|SART3_HUMAN Squamous cell carcinoma antigen recognized by T-cells 3 OS=Homo sapiens OX=96	2	6	1	1	11.4	3.5	3.5	105.58	927	927;963	0.002004	6.7365	NaN	NaN	NaN	1	0	Median	462760	324020	138740	ALQRPSAAAPQAENGPAAAPAVAAPAATEAPK;ATAAETSASEPEAESK;EAALVQQEEEK;GLALWEAYR;RVENSIPAAGETQNVEVAAGPAGK;TEGSLEDWDIAVQK				1249	558;820;1558;3091;6918;7797	True;False;False;False;False;False	593;870;1663;3284;7451;8387	827;1214;2366;4657;10654;11998	1242;1243;1244;1815;1816;1817;1818;3596;7152;16207;16208;18236	1242;1817;3596;7152;16207;18236			9606;9606
CNN3	Calponin-3;Calponin	NaN	Q15417-3;Q15417;E9PDU6;Q15417-2	Q15417-3;Q15417;E9PDU6;Q15417-2	2;2;1;1	1;1;1;1	1;1;1;1	sp|Q15417-3|CNN3-3_HUMAN Isoform of Q15417, Isoform 3 of Calponin-3 OS=Homo sapiens OX=9606 GN=CNN3 PE=1 SV=1;sp|Q15417|CNN3_HUMAN Calponin-3 OS=Homo sapiens OX=9606 GN=CNN3 PE=1 SV=1;tr|E9PDU6|E9PDU6_HUMAN Isoform of Q15417, Calponin (Fragment) OS=Homo sa	4	2	1	1	8.8	4.9	4.9	31.38	283	283;329;185;288	0.0014461	7.994	NaN	NaN	NaN	1	0	Median	363340	221320	142010	AGQSVIGLQMGTNK;GPSYGLSAEVK				1262	347;3220	True;False	365;3419	497;4843;4844	750;7446;7447	750;7447			9606;9606;9606;9606
TBCC	Tubulin-specific chaperone C	NaN	Q15814	Q15814	1	1	1	sp|Q15814|TBCC_HUMAN Tubulin-specific chaperone C OS=Homo sapiens OX=9606 GN=TBCC PE=1 SV=2	1	1	1	1	2.6	2.6	2.6	39.248	346	346	0.0050633	6.4075	NaN	NaN	NaN	1	0	Median	346020	216800	129220	AAVEELLER				1269	126	TRUE	134	164	252	252			9606
PAN2	PAB-dependent poly(A)-specific ribonuclease subunit PAN2	NaN	Q504Q3-2;Q504Q3-3;Q504Q3	Q504Q3-2;Q504Q3-3;Q504Q3	1;1;1	1;1;1	1;1;1	sp|Q504Q3-2|PAN2-2_HUMAN Isoform of Q504Q3, Isoform 2 of PAN2-PAN3 deadenylation complex catalytic subunit PAN2 OS=Homo sapiens OX=9606 GN=PAN2 PE=1 SV=3;sp|Q504Q3-3|PAN2-3_HUMAN Isoform of Q504Q3, Isoform 3 of PAN2-PAN3 deadenylation complex catalytic sub	3	1	1	1	1.3	1.3	1.3	135.01	1198	1198;1201;1202	0.0062775	6.349	NaN	NaN	NaN	1	0	Median	1343100	719650	623440	HLPDILVINCEVNSSK				1288	3516	TRUE	3726	5306	8141	8141			9606;9606;9606
C17orf85	Uncharacterized protein C17orf85	NaN	Q53F19;Q53F19-2;K7ELP6	Q53F19;Q53F19-2;K7ELP6	2;2;1	2;2;1	2;2;1	sp|Q53F19|NCBP3_HUMAN Nuclear cap-binding protein subunit 3 OS=Homo sapiens OX=9606 GN=NCBP3 PE=1 SV=2;sp|Q53F19-2|NCBP3-2_HUMAN Isoform of Q53F19, Isoform 2 of Nuclear cap-binding protein subunit 3 OS=Homo sapiens OX=9606 GN=NCBP3 PE=1 SV=2;tr|K7ELP6|K7EL	3	2	2	2	3.7	3.7	3.7	70.592	620	620;340;80	0	12.563	NaN	NaN	NaN	1	0	Median	419850	221940	197920	ADSVSSSNIK;APGAEEDDSELQR				1291	179;655	True;True	190;700	246;974	376;1466	376;1466			9606;9606;9606
NOM1	Nucleolar MIF4G domain-containing protein 1	NaN	Q5C9Z4	Q5C9Z4	1	1	1	sp|Q5C9Z4|NOM1_HUMAN Nucleolar MIF4G domain-containing protein 1 OS=Homo sapiens OX=9606 GN=NOM1 PE=1 SV=1	1	1	1	1	1.5	1.5	1.5	96.256	860	860	0.0014451	7.9745	NaN	NaN	NaN	1	0	Median	379320	199030	180280	ASGAGSEFQDQTR				1296	769	TRUE	816	1143	1706;1707	1706			9606
ANKRD36C	Ankyrin repeat domain-containing protein 36C	NaN	Q5JPF3-2;Q5JPF3	Q5JPF3-2;Q5JPF3	1;1	1;1	1;1	sp|Q5JPF3-2|AN36C-2_HUMAN Isoform of Q5JPF3, Isoform 2 of Ankyrin repeat domain-containing protein 36C OS=Homo sapiens OX=9606 GN=ANKRD36C PE=1 SV=3;sp|Q5JPF3|AN36C_HUMAN Ankyrin repeat domain-containing protein 36C OS=Homo sapiens OX=9606 GN=ANKRD36C PE=1	2	1	1	1	1	1	1	92.831	805	805;1778	0.0014684	8.9872	NaN	NaN	NaN	0	0	Median	0	0	0	LSEKEEIK				1300	5432	TRUE	5762	8215	12512	12512			9606;9606
PCID2	PCI domain-containing protein 2	NaN	Q5JVF3-3;Q5JVF3-2;Q5JVF3;Q5JVF3-4	Q5JVF3-3;Q5JVF3-2;Q5JVF3;Q5JVF3-4	1;1;1;1	1;1;1;1	1;1;1;1	sp|Q5JVF3-3|PCID2-3_HUMAN Isoform of Q5JVF3, Isoform 3 of PCI domain-containing protein 2 OS=Homo sapiens OX=9606 GN=PCID2 PE=1 SV=2;sp|Q5JVF3-2|PCID2-2_HUMAN Isoform of Q5JVF3, Isoform 2 of PCI domain-containing protein 2 OS=Homo sapiens OX=9606 GN=PCID2	4	1	1	1	3.2	3.2	3.2	43.374	376	376;397;399;453	0.0020298	6.8265	NaN	NaN	NaN	1	0	Median	1363200	744190	619020	VFANNADQQLVK				1303	8524	TRUE	9160	13147	20037	20037			9606;9606;9606;9606
ZNFX1	NFX1-type zinc finger-containing protein 1	NaN	Q5JXR7;Q5JXR5;Q5JXR6;Q9P2E3-2;Q9P2E3	Q5JXR7;Q5JXR5;Q5JXR6;Q9P2E3-2;Q9P2E3	1;1;1;1;1	1;1;1;1;1	1;1;1;1;1	tr|Q5JXR7|Q5JXR7_HUMAN Isoform of Q9P2E3, NFX1-type zinc finger-containing protein 1 (Fragment) OS=Homo sapiens OX=9606 GN=ZNFX1 PE=1 SV=1;tr|Q5JXR5|Q5JXR5_HUMAN Isoform of Q9P2E3, NFX1-type zinc finger-containing protein 1 (Fragment) OS=Homo sapiens OX=96	5	1	1	1	1.6	1.6	1.6	81.151	707	707;934;1270;903;1918	1	-2	NaN	NaN	NaN	0	0	Median	151720	0	151720	LLYGSLVCMSK	+			1305	5192	TRUE	5506	7865	11989	11989	988	260	9606;9606;9606;9606;9606
MPP7	MAGUK p55 subfamily member 7	NaN	U5GXS2;Q5T2T1-2;Q5T2T1	U5GXS2;Q5T2T1-2;Q5T2T1	1;1;1	1;1;1	1;1;1	tr|U5GXS2|U5GXS2_HUMAN Isoform of Q5T2T1, MAGUK p55 subfamily member 7 (Fragment) OS=Homo sapiens OX=9606 GN=MPP7 PE=1 SV=1;sp|Q5T2T1-2|MPP7-2_HUMAN Isoform of Q5T2T1, Isoform 2 of MAGUK p55 subfamily member 7 OS=Homo sapiens OX=9606 GN=MPP7 PE=1 SV=1;sp|Q	3	1	1	1	3.8	3.8	3.8	36.01	312	312;374;576	0.0079951	6.242	NaN	NaN	NaN	1	0	Median	253520	162990	90525	NNYYGTSIDSVR				1312	6280	TRUE	6771	9658	14683;14684	14683			9606;9606;9606
ERICH6B	Glutamate-rich protein 6B	NaN	Q5W0A0-2;Q5W0A0	Q5W0A0-2;Q5W0A0	1;1	1;1	1;1	sp|Q5W0A0-2|ERI6B-2_HUMAN Isoform of Q5W0A0, Isoform 2 of Glutamate-rich protein 6B OS=Homo sapiens OX=9606 GN=ERICH6B PE=4 SV=1;sp|Q5W0A0|ERI6B_HUMAN Glutamate-rich protein 6B OS=Homo sapiens OX=9606 GN=ERICH6B PE=2 SV=1	2	1	1	1	1	1	1	80.892	690	690;696	0.009697	6.115	NaN	NaN	NaN	0	0	Median	0	0	0	LVIMLKK				1320	5608	TRUE	5945	8467	12880	12880	990	390	9606;9606
CDC42BPG	Serine/threonine-protein kinase MRCK gamma	NaN	Q6DT37	Q6DT37	1	1	1	sp|Q6DT37|MRCKG_HUMAN Serine/threonine-protein kinase MRCK gamma OS=Homo sapiens OX=9606 GN=CDC42BPG PE=1 SV=2	1	1	1	1	0.8	0.8	0.8	172.46	1551	1551	0.0020148	6.7677	NaN	NaN	NaN	1	0	Median	235400	139580	95817	LTQVQEAQLQAER				1323	5559	TRUE	5896	8396	12780;12781	12781			9606
TTC37	Tetratricopeptide repeat protein 37	NaN	Q6PGP7	Q6PGP7	1	1	1	sp|Q6PGP7|TTC37_HUMAN Tetratricopeptide repeat protein 37 OS=Homo sapiens OX=9606 GN=TTC37 PE=1 SV=1	1	1	1	1	0.8	0.8	0.8	175.48	1564	1564	0.0020134	6.7663	NaN	NaN	NaN	1	0	Median	228410	158650	69759	SNPDQPAVILLLR				1330	7377	TRUE	7943	11354	17253	17253			9606
SAMD1	Atherin	NaN	Q6SPF0	Q6SPF0	1	1	1	sp|Q6SPF0|SAMD1_HUMAN Atherin OS=Homo sapiens OX=9606 GN=SAMD1 PE=1 SV=1	1	1	1	1	3.7	3.7	3.7	56.051	538	538	0.0014035	7.2571	NaN	NaN	NaN	1	0	Median	452480	172850	279630	AAAAAATAPPSPGPAQPGPR				1334	5	TRUE	6	13	16	16			9606
		NaN	Q6ZNE5-2	Q6ZNE5-2	1	1	1	sp|Q6ZNE5-2|BAKOR-2_HUMAN Isoform of Q6ZNE5, Isoform 2 of Beclin 1-associated autophagy-related key regulator OS=Homo sapiens OX=9606 GN=ATG14 PE=1 SV=1	1	1	1	1	2.9	2.9	2.9	42.433	379	379	1	-2	NaN	NaN	NaN	0	0	Median	0	0	0	MSCKMRIEQLK	+			1337	5944	TRUE	6397	9072	13784	13784	1008;1009	1;5	9606
PARS2	Probable proline--tRNA ligase, mitochondrial	NaN	Q7L3T8	Q7L3T8	1	1	1	sp|Q7L3T8|SYPM_HUMAN Probable proline--tRNA ligase, mitochondrial OS=Homo sapiens OX=9606 GN=PARS2 PE=1 SV=1	1	1	1	1	2.7	2.7	2.7	53.262	475	475	1	-2	NaN	NaN	NaN	1	0	Median	162220	101140	61076	VIDQEMQAIGGQK	+			1345	8636	TRUE	9276	13319	20318	20318	1017	109	9606
DHX32	Putative pre-mRNA-splicing factor ATP-dependent RNA helicase DHX32	NaN	Q7L7V1-2;Q7L7V1	Q7L7V1-2;Q7L7V1	1;1	1;1	1;1	sp|Q7L7V1-2|DHX32-2_HUMAN Isoform of Q7L7V1, Isoform 2 of Putative pre-mRNA-splicing factor ATP-dependent RNA helicase DHX32 OS=Homo sapiens OX=9606 GN=DHX32 PE=1 SV=1;sp|Q7L7V1|DHX32_HUMAN Putative pre-mRNA-splicing factor ATP-dependent RNA helicase DHX32	2	1	1	1	1.8	1.8	1.8	75.087	662	662;743	0.003268	6.6101	NaN	NaN	NaN	1	0	Median	260770	144200	116580	LIINSSPHLISK				1349	4953	TRUE	5257	7509	11483	11483			9606;9606
TNRC11;MED12	Mediator of RNA polymerase II transcription subunit 12	NaN	Q7Z3Z5;Q93074-3;Q93074;Q93074-2	Q7Z3Z5;Q93074-3;Q93074;Q93074-2	1;1;1;1	1;1;1;1	1;1;1;1	tr|Q7Z3Z5|Q7Z3Z5_HUMAN Isoform of Q93074, Mediator of RNA polymerase II transcription subunit 12 OS=Homo sapiens OX=9606 GN=MED12 PE=1 SV=1;sp|Q93074-3|MED12-3_HUMAN Isoform of Q93074, Isoform 3 of Mediator of RNA polymerase II transcription subunit 12 OS=	4	1	1	1	0.6	0.6	0.6	226.32	2027	2027;2176;2177;2180	0.0014205	7.4189	NaN	NaN	NaN	1	0	Median	250550	159200	91349	LLDNEDGENPQR				1355	5031	TRUE	5340	7637	11658	11658			9606;9606;9606;9606
GLRX5	Glutaredoxin-related protein 5, mitochondrial	NaN	Q86SX6	Q86SX6	1	1	1	sp|Q86SX6|GLRX5_HUMAN Glutaredoxin-related protein 5, mitochondrial OS=Homo sapiens OX=9606 GN=GLRX5 PE=1 SV=2	1	1	1	1	7	7	7	16.628	157	157	0.0020436	6.8877	NaN	NaN	NaN	1	0	Median	865750	527100	338650	LGIHSALLDEK				1361	4868	TRUE	5168	7388	11288	11288			9606
XYLT1	Xylosyltransferase 1	NaN	Q86Y38	Q86Y38	1	1	1	sp|Q86Y38|XYLT1_HUMAN Xylosyltransferase 1 OS=Homo sapiens OX=9606 GN=XYLT1 PE=1 SV=1	1	1	1	1	0.8	0.8	0.8	107.57	959	959	0.0020492	6.9256	NaN	NaN	NaN	0	0	Median	0	0	0	EAISALSR				1369	1600	TRUE	1709	2422	3682	3682			9606
HPS6	Hermansky-Pudlak syndrome 6 protein	NaN	Q86YV9	Q86YV9	1	1	1	sp|Q86YV9|HPS6_HUMAN Hermansky-Pudlak syndrome 6 protein OS=Homo sapiens OX=9606 GN=HPS6 PE=1 SV=1	1	1	1	1	1.5	1.5	1.5	82.974	775	775	0.0020325	6.8444	NaN	NaN	NaN	1	0	Median	201270	112250	89019	AVLQAVGQLVQK				1371	935	TRUE	995	1395	2091	2091			9606
AHNAK2	Protein AHNAK2	NaN	Q8IVF2-3;Q8IVF2	Q8IVF2-3;Q8IVF2	1;1	1;1	1;1	sp|Q8IVF2-3|AHNK2-3_HUMAN Isoform of Q8IVF2, Isoform 3 of Protein AHNAK2 OS=Homo sapiens OX=9606 GN=AHNAK2 PE=1 SV=2;sp|Q8IVF2|AHNK2_HUMAN Protein AHNAK2 OS=Homo sapiens OX=9606 GN=AHNAK2 PE=1 SV=2	2	1	1	1	0.3	0.3	0.3	605.64	5695	5695;5795	1	-2	NaN	NaN	NaN	0	0	Median	892080	892080	0	LEGDLSLADKGMTAK	+			1377	4700	TRUE	4988	7126	10899	10899	1027	2706	9606;9606
MISP	Mitotic interactor and substrate of PLK1	NaN	Q8IVT2	Q8IVT2	1	1	1	sp|Q8IVT2|MISP_HUMAN Mitotic interactor and substrate of PLK1 OS=Homo sapiens OX=9606 GN=MISP PE=1 SV=1	1	1	1	1	2.5	2.5	2.5	75.356	679	679	0.0044786	6.4608	NaN	NaN	NaN	1	0	Median	930080	579570	350510	SSTVATLQGTPDHGDPR				1378	7540	TRUE	8117	11596	17644	17644			9606
C1orf174	UPF0688 protein C1orf174	NaN	Q8IYL3	Q8IYL3	1	1	1	sp|Q8IYL3|CA174_HUMAN UPF0688 protein C1orf174 OS=Homo sapiens OX=9606 GN=C1orf174 PE=1 SV=2	1	1	1	1	5.8	5.8	5.8	25.977	243	243	0.0044872	6.477	NaN	NaN	NaN	1	0	Median	291600	185300	106300	LASAQEVAGSTSAK				1386	4577	TRUE	4858	6939	10629	10629			9606
CHPF	Chondroitin sulfate synthase 2	NaN	Q8IZ52-2;Q8IZ52-4;Q8IZ52	Q8IZ52-2;Q8IZ52-4;Q8IZ52	1;1;1	1;1;1	1;1;1	sp|Q8IZ52-2|CHSS2-2_HUMAN Isoform of Q8IZ52, Isoform 2 of Chondroitin sulfate synthase 2 OS=Homo sapiens OX=9606 GN=CHPF PE=1 SV=2;sp|Q8IZ52-4|CHSS2-4_HUMAN Isoform of Q8IZ52, Isoform 3 of Chondroitin sulfate synthase 2 OS=Homo sapiens OX=9606 GN=CHPF PE=1	3	1	1	1	2.5	2.5	2.5	34.955	315	315;613;775	1	-2	NaN	NaN	NaN	1	0	Median	512000	188390	323620	LMDLLSKK	+			1388	5200	TRUE	5517	7880	12010	12010	1029	138	9606;9606;9606
		NaN	Q8N490-2	Q8N490-2	1	1	1	sp|Q8N490-2|PNKD-2_HUMAN Isoform of Q8N490, Isoform 2 of Probable hydrolase PNKD OS=Homo sapiens OX=9606 GN=PNKD PE=1 SV=2	1	1	1	1	7.7	7.7	7.7	15.396	142	142	0.0039012	6.58	NaN	NaN	NaN	1	0	Median	685720	415980	269740	LSNTGEYESQR				1393	5459	TRUE	5790	8255	12571;12572	12572			9606
JMY	Junction-mediating and -regulatory protein	NaN	Q8N9B5-2;Q8N9B5	Q8N9B5-2;Q8N9B5	1;1	1;1	1;1	sp|Q8N9B5-2|JMY-2_HUMAN Isoform of Q8N9B5, Isoform 2 of Junction-mediating and -regulatory protein OS=Homo sapiens OX=9606 GN=JMY PE=1 SV=2;sp|Q8N9B5|JMY_HUMAN Junction-mediating and -regulatory protein OS=Homo sapiens OX=9606 GN=JMY PE=1 SV=2	2	1	1	1	1.2	1.2	1.2	110.28	976	976;988	1	-2	NaN	NaN	NaN	0	0	Median	0	0	0	ISMENDYLGPRR	+			1397	4156	TRUE	4410	6283;6284	9660;9661	9661	1032	405	9606;9606
ZNF579	Zinc finger protein 579	NaN	Q8NAF0	Q8NAF0	1	1	1	sp|Q8NAF0|ZN579_HUMAN Zinc finger protein 579 OS=Homo sapiens OX=9606 GN=ZNF579 PE=1 SV=2	1	1	1	1	2.7	2.7	2.7	60.509	562	562	0.005689	6.3967	NaN	NaN	NaN	1	1	Median	234330	129330	105000	ESESEEAEAGAAELR				1399	2252	TRUE	2394	3410	5243	5243			9606
PPP1R35	Protein phosphatase 1 regulatory subunit 35	NaN	Q8TAP8	Q8TAP8	1	1	1	sp|Q8TAP8|PPR35_HUMAN Protein phosphatase 1 regulatory subunit 35 OS=Homo sapiens OX=9606 GN=PPP1R35 PE=1 SV=1	1	1	1	1	4.3	4.3	4.3	27.953	253	253	1	-2	NaN	NaN	NaN	1	0	Median	533880	303780	230100	MMMGCGESELK	+			1409	5891	TRUE	6321	8978	13654	13654	1034	3	9606
NEK9	Serine/threonine-protein kinase Nek9	NaN	Q8TD19	Q8TD19	2	2	2	sp|Q8TD19|NEK9_HUMAN Serine/threonine-protein kinase Nek9 OS=Homo sapiens OX=9606 GN=NEK9 PE=1 SV=2	1	2	2	2	2.8	2.8	2.8	107.17	979	979	0	13.954	NaN	NaN	NaN	1	0	Median	527490	323140	204350	LGINLLGGPLGGK;LGLDSEEDYYTPQK				1410	4869;4873	True;True	5169;5173	7389;7393	11289;11290;11295	11290;11295			9606
GPT2	Alanine aminotransferase 2	NaN	Q8TD30	Q8TD30	1	1	1	sp|Q8TD30|ALAT2_HUMAN Alanine aminotransferase 2 OS=Homo sapiens OX=9606 GN=GPT2 PE=1 SV=1	1	1	1	1	2.3	2.3	2.3	57.903	523	523	0.0033047	6.6662	NaN	NaN	NaN	1	0	Median	230760	168640	62121	ILTLESMNPQVK				1411	3983	TRUE	4215	6024	9267	9267	1035	53	9606
TMEM171	Transmembrane protein 171	NaN	Q8WVE6-2;Q8WVE6	Q8WVE6-2;Q8WVE6	1;1	1;1	1;1	sp|Q8WVE6-2|TM171-2_HUMAN Isoform of Q8WVE6, Isoform 2 of Transmembrane protein 171 OS=Homo sapiens OX=9606 GN=TMEM171 PE=4 SV=3;sp|Q8WVE6|TM171_HUMAN Transmembrane protein 171 OS=Homo sapiens OX=9606 GN=TMEM171 PE=1 SV=3	2	1	1	1	4	4	4	34.603	323	323;324	1	-2	NaN	NaN	NaN	1	0	Median	1061800	528450	533400	AGLQRGQQMDPDR	+			1417	333	TRUE	350	479	722	722	1037	95	9606;9606
TRUB1	Probable tRNA pseudouridine synthase 1	NaN	Q8WWH5	Q8WWH5	1	1	1	sp|Q8WWH5|TRUB1_HUMAN Probable tRNA pseudouridine synthase 1 OS=Homo sapiens OX=9606 GN=TRUB1 PE=1 SV=1	1	1	1	1	3.2	3.2	3.2	37.252	349	349	0.002095	7.2117	NaN	NaN	NaN	1	0	Median	366550	205540	161010	AAAAVVAAAAR				1422	14	TRUE	16	23	35	35			9606
		NaN	Q8WX92-2	Q8WX92-2	1	1	1	sp|Q8WX92-2|NELFB-2_HUMAN Isoform of Q8WX92, Isoform 2 of Negative elongation factor B OS=Homo sapiens OX=9606 GN=NELFB PE=1 SV=1	1	1	1	1	1.9	1.9	1.9	70.056	628	628	0.0020216	6.7996	NaN	NaN	NaN	1	0	Median	428880	275030	153860	ASGVSAAAPGER				1423	777	TRUE	825	1156	1731	1731			9606
SREK1	Splicing regulatory glutamine/lysine-rich protein 1	NaN	Q8WXA9;Q8WXA9-2	Q8WXA9;Q8WXA9-2	1;1	1;1	1;1	sp|Q8WXA9|SREK1_HUMAN Splicing regulatory glutamine/lysine-rich protein 1 OS=Homo sapiens OX=9606 GN=SREK1 PE=1 SV=1;sp|Q8WXA9-2|SREK1-2_HUMAN Isoform of Q8WXA9, Isoform 2 of Splicing regulatory glutamine/lysine-rich protein 1 OS=Homo sapiens OX=9606 GN=SR	2	1	1	1	2	2	2	59.38	508	508;624	0.0080296	6.2744	NaN	NaN	NaN	1	0	Median	276640	146740	129900	MAGDETQPTR				1425	5715	TRUE	6060	8626	13129	13129			9606;9606
ACOT11	Acyl-coenzyme A thioesterase 11	NaN	Q8WXI4-2;Q8WXI4	Q8WXI4-2;Q8WXI4	1;1	1;1	1;1	sp|Q8WXI4-2|ACO11-2_HUMAN Isoform of Q8WXI4, Isoform 2 of Acyl-coenzyme A thioesterase 11 OS=Homo sapiens OX=9606 GN=ACOT11 PE=1 SV=1;sp|Q8WXI4|ACO11_HUMAN Acyl-coenzyme A thioesterase 11 OS=Homo sapiens OX=9606 GN=ACOT11 PE=1 SV=1	2	1	1	1	1.7	1.7	1.7	67.152	594	594;607	0.0062735	6.3485	NaN	NaN	NaN	1	0	Median	159670	89760	69905	GELSVGQLLK				1426	2914	TRUE	3098	4381	6727	6727			9606;9606
BRI3BP	BRI3-binding protein	NaN	Q8WY22	Q8WY22	1	1	1	sp|Q8WY22|BRI3B_HUMAN BRI3-binding protein OS=Homo sapiens OX=9606 GN=BRI3BP PE=1 SV=1	1	1	1	1	6.8	6.8	6.8	27.835	251	251	0.0014124	7.3443	NaN	NaN	NaN	1	0	Median	594100	363670	230430	SSPSGPSNPSNPSVEEK				1428	7519	TRUE	8095	11571	17605;17606;17607	17606			9606
CNTNAP5	Contactin-associated protein-like 5	NaN	Q8WYK1	Q8WYK1	1	1	1	sp|Q8WYK1|CNTP5_HUMAN Contactin-associated protein-like 5 OS=Homo sapiens OX=9606 GN=CNTNAP5 PE=2 SV=1	1	1	1	1	3.1	3.1	3.1	145.62	1306	1306	0	11.28	NaN	NaN	NaN	1	0	Median	546510	240850	305670	EVSAVFEAGTSVTYMFQEPYPVTKNISLSSSAIYTDSAPSK				1429	2393	TRUE	2548	3640	5593	5593			9606
CCT6B	T-complex protein 1 subunit zeta-2	NaN	Q92526;Q92526-2;Q92526-3	Q92526;Q92526-2;Q92526-3	5;4;4	1;1;1	1;1;1	sp|Q92526|TCPW_HUMAN T-complex protein 1 subunit zeta-2 OS=Homo sapiens OX=9606 GN=CCT6B PE=1 SV=5;sp|Q92526-2|TCPW-2_HUMAN Isoform of Q92526, Isoform 2 of T-complex protein 1 subunit zeta-2 OS=Homo sapiens OX=9606 GN=CCT6B PE=1 SV=5;sp|Q92526-3|TCPW-3_HUM	3	5	1	1	10	2.3	2.3	57.821	530	530;485;493	0.0014358	7.6796	NaN	NaN	NaN	1	0	Median	4140600	1590500	2550100	GFVVINQK;GIDPFSLDSLAK;MLVSGAGDIK;QADLYISEGLHPR;TEVNSGFFYK				1433	2964;3035;5884;6556;7822	False;True;False;False;False	3150;3227;6311;7071;8415	4463;4575;8964;8965;8966;10102;12040	6861;6862;7026;13636;13637;13638;15415;18314;18315	6861;7026;13637;15415;18315	644	46	9606;9606;9606
DHX38	Pre-mRNA-splicing factor ATP-dependent RNA helicase PRP16	NaN	Q92620;H3BV01;H3BQT9;J3KRT1;Q92620-2	Q92620;H3BV01;H3BQT9;J3KRT1;Q92620-2	2;1;1;1;1	2;1;1;1;1	2;1;1;1;1	sp|Q92620|PRP16_HUMAN Pre-mRNA-splicing factor ATP-dependent RNA helicase PRP16 OS=Homo sapiens OX=9606 GN=DHX38 PE=1 SV=2;tr|H3BV01|H3BV01_HUMAN Isoform of Q92620, Pre-mRNA-splicing factor ATP-dependent RNA helicase PRP16 (Fragment) OS=Homo sapiens OX=960	5	2	2	2	1.8	1.8	1.8	140.5	1227	1227;123;138;142;539	0	11.918	NaN	NaN	NaN	1	0	Median	443630	283760	159870	DATSDLAIIAR;GDTSEDASIHR				1440	1075;2881	True;True	1147;3064	1641;4339	2488;6670	2488;6670			9606;9606;9606;9606;9606
MRPS31	28S ribosomal protein S31, mitochondrial	NaN	Q92665	Q92665	1	1	1	sp|Q92665|RT31_HUMAN 28S ribosomal protein S31, mitochondrial OS=Homo sapiens OX=9606 GN=MRPS31 PE=1 SV=3	1	1	1	1	2.3	2.3	2.3	45.318	395	395	0.0044473	6.4306	NaN	NaN	NaN	1	0	Median	853720	509060	344660	VELSTVNVR				1442	8502	TRUE	9136	13113	19977;19978	19978			9606
GPKOW	G patch domain and KOW motifs-containing protein	NaN	Q92917	Q92917	2	2	2	sp|Q92917|GPKOW_HUMAN G-patch domain and KOW motifs-containing protein OS=Homo sapiens OX=9606 GN=GPKOW PE=1 SV=2	1	2	2	2	5.7	5.7	5.7	52.228	476	476	0.00074516	10.981	NaN	NaN	NaN	1	0	Median	447310	254430	192880	ELQSVKPQEAPK;LADSGDGAGPSPEEK				1449	2082;4506	True;True	2218;4783	3174;6838	4879;10465	4879;10465			9606
SMARCC1	SWI/SNF complex subunit SMARCC1	NaN	Q92922	Q92922	4	2	2	sp|Q92922|SMRC1_HUMAN SWI/SNF complex subunit SMARCC1 OS=Homo sapiens OX=9606 GN=SMARCC1 PE=1 SV=3	1	4	2	2	4.6	2.7	2.7	122.87	1105	1105	0	14.944	NaN	NaN	NaN	1	0	Median	855500	465750	389750	AALEEFSR;AENKVENETDEGDKAQDGENEK;SLVALLVETQMK;TPEIYLAYR				1450	71;243;7339;8099	True;True;False;False	77;256;7897;8709	97;341;11295;12487	149;511;17146;17147;18990	149;511;17147;18990	270	904	9606
EMG1	Ribosomal RNA small subunit methyltransferase NEP1	NaN	Q92979	Q92979	1	1	1	sp|Q92979|NEP1_HUMAN Ribosomal RNA small subunit methyltransferase NEP1 OS=Homo sapiens OX=9606 GN=EMG1 PE=1 SV=4	1	1	1	1	4.1	4.1	4.1	26.72	244	244	0.0038835	6.5369	NaN	NaN	NaN	1	0	Median	328600	192020	136580	AAPSDGFKPR				1453	95	TRUE	103	129	202	202			9606
EXOSC8	Exosome complex component RRP43	NaN	Q96B26	Q96B26	1	1	1	sp|Q96B26|EXOS8_HUMAN Exosome complex component RRP43 OS=Homo sapiens OX=9606 GN=EXOSC8 PE=1 SV=1	1	1	1	1	4.7	4.7	4.7	30.039	276	276	0.0014706	9.0301	NaN	NaN	NaN	1	0	Median	1131700	596070	535640	AEFAAPSTDAPDK				1460	216	TRUE	228	305	456;457;458	458			9606
OPTN	Optineurin	NaN	Q96CV9-3;Q96CV9-2;Q96CV9	Q96CV9-3;Q96CV9-2;Q96CV9	1;1;1	1;1;1	1;1;1	sp|Q96CV9-3|OPTN-3_HUMAN Isoform of Q96CV9, Isoform 3 of Optineurin OS=Homo sapiens OX=9606 GN=OPTN PE=1 SV=3;sp|Q96CV9-2|OPTN-2_HUMAN Isoform of Q96CV9, Isoform 2 of Optineurin OS=Homo sapiens OX=9606 GN=OPTN PE=1 SV=3;sp|Q96CV9|OPTN_HUMAN Optineurin OS=H	3	1	1	1	2.5	2.5	2.5	59.559	520	520;571;577	1	-2	NaN	NaN	NaN	1	0	Median	620100	355640	264460	ALASKQLQMDEMK	+			1467	460	TRUE	483	678	1020	1020	1064	390	9606;9606;9606
ASB9	Ankyrin repeat and SOCS box protein 9	NaN	Q96DX5	Q96DX5	1	1	1	sp|Q96DX5|ASB9_HUMAN Ankyrin repeat and SOCS box protein 9 OS=Homo sapiens OX=9606 GN=ASB9 PE=1 SV=1	1	1	1	1	3.7	3.7	3.7	31.857	294	294	0.0097087	6.1257	NaN	NaN	NaN	1	1	Median	1036700	866650	170060	EGPPSLMQLCR				1472	1867	TRUE	1995	2848	4359	4359	1065	259	9606
MEF2BNB	Protein MEF2BNB	NaN	Q96FH0-2;Q96FH0	Q96FH0-2;Q96FH0	1;1	1;1	1;1	sp|Q96FH0-2|BORC8-2_HUMAN Isoform of Q96FH0, Isoform 2 of BLOC-1-related complex subunit 8 OS=Homo sapiens OX=9606 GN=BORCS8 PE=1 SV=1;sp|Q96FH0|BORC8_HUMAN BLOC-1-related complex subunit 8 OS=Homo sapiens OX=9606 GN=BORCS8 PE=1 SV=1	2	1	1	1	8.3	8.3	8.3	12.483	109	109;119	1	-2	NaN	NaN	NaN	0	0	Median	0	0	0	MEEPEMQLK	+			1475	5772	TRUE	6142	8725	13291	13291	1067	6	9606;9606
DYNLL2	Dynein light chain 2, cytoplasmic	NaN	Q96FJ2	Q96FJ2	3	1	1	sp|Q96FJ2|DYL2_HUMAN Dynein light chain 2, cytoplasmic OS=Homo sapiens OX=9606 GN=DYNLL2 PE=1 SV=1	1	3	1	1	49.4	24.7	24.7	10.35	89	89	1	-2	NaN	NaN	NaN	1	1	Median	285570	144910	140660	NADMSEDMQQDAVDCATQAMEK;NFGSYVTHETK;YNPTWHCIVGR	+			1476	6001;6094;9488	True;False;False	6471;6567;10180	9177;9321;14625	13941;14163;14164;22332	13941;14163;22332	1068;1069;1070	13;17;29	9606
CHAMP1	Chromosome alignment-maintaining phosphoprotein 1	NaN	Q96JM3	Q96JM3	2	2	2	sp|Q96JM3|CHAP1_HUMAN Chromosome alignment-maintaining phosphoprotein 1 OS=Homo sapiens OX=9606 GN=CHAMP1 PE=1 SV=2	1	2	2	2	3.3	3.3	3.3	89.098	812	812	0	12.253	NaN	NaN	NaN	1	0	Median	477160	254560	222600	EAFISEEEIAK;SSFFIEPQKPVFPETR				1487	1578;7493	True;True	1685;8069	2391;11530	3635;17535	3635;17535			9606
PURB	Transcriptional activator protein Pur-beta	NaN	Q96QR8	Q96QR8	1	1	1	sp|Q96QR8|PURB_HUMAN Transcriptional activator protein Pur-beta OS=Homo sapiens OX=9606 GN=PURB PE=1 SV=3	1	1	1	1	4.2	4.2	4.2	33.24	312	312	0.0038511	6.4866	NaN	NaN	NaN	1	0	Median	423720	259850	163870	GGGEQETQELASK				1493	2982	TRUE	3170	4490	6898;6899	6898			9606
PDCD2L	Programmed cell death protein 2-like	NaN	Q9BRP1	Q9BRP1	2	2	2	sp|Q9BRP1|PDD2L_HUMAN Programmed cell death protein 2-like OS=Homo sapiens OX=9606 GN=PDCD2L PE=1 SV=1	1	2	2	2	6.4	6.4	6.4	39.416	358	358	0	11.931	NaN	NaN	NaN	1	0	Median	387120	236210	150910	LGGIPDALPTVAAPR;SGDQTFYK				1513	4853;7142	True;True	5151;7688	7359;10961	11239;16677	11239;16677			9606
HDHD3	Haloacid dehalogenase-like hydrolase domain-containing protein 3	NaN	Q9BSH5	Q9BSH5	1	1	1	sp|Q9BSH5|HDHD3_HUMAN Haloacid dehalogenase-like hydrolase domain-containing protein 3 OS=Homo sapiens OX=9606 GN=HDHD3 PE=1 SV=1	1	1	1	1	3.6	3.6	3.6	28	251	251	0.0080495	6.2811	NaN	NaN	NaN	1	0	Median	678630	468030	210590	LAVISNFDR				1518	4596	TRUE	4878	6976	10689;10690	10690			9606
MMTAG2	Multiple myeloma tumor-associated protein 2	NaN	Q9BU76-4;Q9BU76	Q9BU76-4;Q9BU76	1;1	1;1	1;1	sp|Q9BU76-4|MMTA2-4_HUMAN Isoform of Q9BU76, Isoform 4 of Multiple myeloma tumor-associated protein 2 OS=Homo sapiens OX=9606 GN=MMTAG2 PE=1 SV=1;sp|Q9BU76|MMTA2_HUMAN Multiple myeloma tumor-associated protein 2 OS=Homo sapiens OX=9606 GN=MMTAG2 PE=1 SV=1	2	1	1	1	7.4	7.4	7.4	20.536	189	189;263	0.0014174	7.4084	NaN	NaN	NaN	1	0	Median	351090	207720	143360	VESGGPGTSAASAR				1524	8514	TRUE	9150	13132	20011;20012	20012			9606;9606
TMEM109	Transmembrane protein 109	NaN	Q9BVC6	Q9BVC6	1	1	1	sp|Q9BVC6|TM109_HUMAN Transmembrane protein 109 OS=Homo sapiens OX=9606 GN=TMEM109 PE=1 SV=1	1	1	1	1	4.9	4.9	4.9	26.21	243	243	0.0038986	6.5789	NaN	NaN	NaN	1	0	Median	807560	538560	269000	EAPVDVLTQIGR				1528	1631	TRUE	1743	2475	3773	3773			9606
UTP14A	U3 small nucleolar RNA-associated protein 14 homolog A	NaN	Q9BVJ6-3;Q9BVJ6;X6RJY0;Q9BVJ6-2	Q9BVJ6-3;Q9BVJ6;X6RJY0;Q9BVJ6-2	2;2;1;1	2;2;1;1	2;2;1;1	sp|Q9BVJ6-3|UT14A-3_HUMAN Isoform of Q9BVJ6, Isoform 3 of U3 small nucleolar RNA-associated protein 14 homolog A OS=Homo sapiens OX=9606 GN=UTP14A PE=1 SV=1;sp|Q9BVJ6|UT14A_HUMAN U3 small nucleolar RNA-associated protein 14 homolog A OS=Homo sapiens OX=960	4	2	2	2	3.3	3.3	3.3	82.004	719	719;771;320;603	0.00075019	11.114	NaN	NaN	NaN	1	1	Median	537330	445360	91970	ARMMERMSLK;VSEFNVSSEGSGEK				1529	745;9013	True;True	791;9678	1114;13877	1670;21185	1670;21185	1097;1098;1099	239;240;243	9606;9606;9606;9606
DDA1	DET1- and DDB1-associated protein 1	NaN	Q9BW61	Q9BW61	1	1	1	sp|Q9BW61|DDA1_HUMAN DET1- and DDB1-associated protein 1 OS=Homo sapiens OX=9606 GN=DDA1 PE=1 SV=1	1	1	1	1	15.7	15.7	15.7	11.835	102	102	0.00074019	9.7489	NaN	NaN	NaN	1	1	Median	161710	48609	113100	DQEQVELEGESSAPPR				1533	1377	TRUE	1477	2101	3187	3187			9606
MAK16	Protein MAK16 homolog	NaN	Q9BXY0	Q9BXY0	1	1	1	sp|Q9BXY0|MAK16_HUMAN Protein MAK16 homolog OS=Homo sapiens OX=9606 GN=MAK16 PE=1 SV=2	1	1	1	1	4.3	4.3	4.3	35.368	300	300	0.0020339	6.8524	NaN	NaN	NaN	1	0	Median	539140	319610	219530	ALIAAQLDNAIEK				1537	516	TRUE	547	775	1167	1167			9606
MRPS26	28S ribosomal protein S26, mitochondrial	NaN	Q9BYN8	Q9BYN8	1	1	1	sp|Q9BYN8|RT26_HUMAN 28S ribosomal protein S26, mitochondrial OS=Homo sapiens OX=9606 GN=MRPS26 PE=1 SV=1	1	1	1	1	5.4	5.4	5.4	24.211	205	205	0.0080148	6.2659	NaN	NaN	NaN	1	0	Median	205480	128550	76926	ELMAWNQAENR				1542	2063	TRUE	2198	3152	4845	4845			9606
WDR11	WD repeat-containing protein 11	NaN	S4R3Z0;Q9BZH6	S4R3Z0;Q9BZH6	1;1	1;1	1;1	tr|S4R3Z0|S4R3Z0_HUMAN Isoform of Q9BZH6, WD repeat-containing protein 11 (Fragment) OS=Homo sapiens OX=9606 GN=WDR11 PE=1 SV=1;sp|Q9BZH6|WDR11_HUMAN WD repeat-containing protein 11 OS=Homo sapiens OX=9606 GN=WDR11 PE=1 SV=1	2	1	1	1	3.8	3.8	3.8	34.326	312	312;1224	0.0020761	7.1175	NaN	NaN	NaN	1	0	Median	421710	315410	106300	NELQLVDLPTGR				1545	6072	TRUE	6544	9292	14115	14115			9606;9606
NACAP1	Putative nascent polypeptide-associated complex subunit alpha-like protein	NaN	Q9BZK3	Q9BZK3	2	1	1	sp|Q9BZK3|NACP4_HUMAN Putative nascent polypeptide-associated complex subunit alpha-like protein OS=Homo sapiens OX=9606 GN=NACA4P PE=5 SV=1	1	2	1	1	13.1	7	7	23.306	213	213	0.0014255	7.481	NaN	NaN	NaN	1	0	Median	289250	162940	126310	IEDLSQEAQLAAAEK;NILFVITKPDVYK				1546	3704;6137	True;False	3923;6612	5581;9399;9400	8566;8567;8568;14296;14297;14298;14299;14300;14301;14302	8567;14302			9606
PRKD2	Serine/threonine-protein kinase D2	NaN	Q9BZL6-2;Q9BZL6;Q9BZL6-3	Q9BZL6-2;Q9BZL6;Q9BZL6-3	1;1;1	1;1;1	1;1;1	sp|Q9BZL6-2|KPCD2-2_HUMAN Isoform of Q9BZL6, Isoform 2 of Serine/threonine-protein kinase D2 OS=Homo sapiens OX=9606 GN=PRKD2 PE=1 SV=3;sp|Q9BZL6|KPCD2_HUMAN Serine/threonine-protein kinase D2 OS=Homo sapiens OX=9606 GN=PRKD2 PE=1 SV=3;sp|Q9BZL6-3|KPCD2-3_	3	1	1	1	1.7	1.7	1.7	80.114	721	721;878;888	0.0080049	6.2609	NaN	NaN	NaN	1	0	Median	258500	123690	134810	AQSSLGYIPLMR				1547	729	TRUE	775	1092	1643	1643			9606;9606;9606
UBE2O	E2/E3 hybrid ubiquitin-protein ligase UBE2O	NaN	Q9C0C9;K7ES11	Q9C0C9;K7ES11	2;1	2;1	2;1	sp|Q9C0C9|UBE2O_HUMAN (E3-independent) E2 ubiquitin-conjugating enzyme OS=Homo sapiens OX=9606 GN=UBE2O PE=1 SV=3;tr|K7ES11|K7ES11_HUMAN Isoform of Q9C0C9, (E3-independent) E2 ubiquitin-conjugating enzyme (Fragment) OS=Homo sapiens OX=9606 GN=UBE2O PE=1 SV	2	2	2	2	2.5	2.5	2.5	141.29	1292	1292;807	0	12.114	NaN	NaN	NaN	1	0	Median	481860	281480	200380	GLQEGYENSR;IGNTEDGAPHKEDEPSVGQVAR				1549	3136;3807	True;True	3331;4031	4717;5744	7237;8831	7237;8831			9606;9606
RNF38	E3 ubiquitin-protein ligase RNF38	NaN	Q9H0F5-2;Q9H0F5	Q9H0F5-2;Q9H0F5	1;1	1;1	1;1	sp|Q9H0F5-2|RNF38-2_HUMAN Isoform of Q9H0F5, Isoform 2 of E3 ubiquitin-protein ligase RNF38 OS=Homo sapiens OX=9606 GN=RNF38 PE=1 SV=4;sp|Q9H0F5|RNF38_HUMAN E3 ubiquitin-protein ligase RNF38 OS=Homo sapiens OX=9606 GN=RNF38 PE=1 SV=4	2	1	1	1	4.7	4.7	4.7	52.106	465	465;515	0.0039113	6.5997	NaN	NaN	NaN	0	0	Median	7780000	0	7780000	QRLSHSVFDYTSASPAPSPPMR				1557	6778	TRUE	7305	10421	15871	15871			9606;9606
TRIOBP	TRIO and F-actin-binding protein	NaN	Q9H2D6-5;Q9H2D6-7;Q9H2D6-3;Q9H2D6-2;Q9H2D6	Q9H2D6-5;Q9H2D6-7;Q9H2D6-3;Q9H2D6-2;Q9H2D6	1;1;1;1;1	1;1;1;1;1	1;1;1;1;1	sp|Q9H2D6-5|TARA-5_HUMAN Isoform of Q9H2D6, Isoform 1 of TRIO and F-actin-binding protein OS=Homo sapiens OX=9606 GN=TRIOBP PE=1 SV=3;sp|Q9H2D6-7|TARA-7_HUMAN Isoform of Q9H2D6, Isoform 7 of TRIO and F-actin-binding protein OS=Homo sapiens OX=9606 GN=TRIOB	5	1	1	1	2	2	2	68.04	593	593;652;2193;2267;2365	0.0056782	6.3803	NaN	NaN	NaN	1	0	Median	429550	258210	171330	YQDVYVELSHIK				1562	9505	TRUE	10201	14653	22374;22375	22375			9606;9606;9606;9606;9606
ACBD3	Golgi resident protein GCP60	NaN	Q9H3P7	Q9H3P7	1	1	1	sp|Q9H3P7|GCP60_HUMAN Golgi resident protein GCP60 OS=Homo sapiens OX=9606 GN=ACBD3 PE=1 SV=4	1	1	1	1	4.5	4.5	4.5	60.593	528	528	0.00074129	10.041	NaN	NaN	NaN	1	0	Median	648950	339990	308950	GPGASGEQPEPGEAAAGGAAEEAR				1566	3198	TRUE	3395	4803	7374	7374			9606
CXorf56	UPF0428 protein CXorf56	NaN	Q9H5V9-2;Q9H5V9-3;Q9H5V9	Q9H5V9-2;Q9H5V9-3;Q9H5V9	1;1;1	1;1;1	1;1;1	sp|Q9H5V9-2|CX056-2_HUMAN Isoform of Q9H5V9, Isoform 2 of UPF0428 protein CXorf56 OS=Homo sapiens OX=9606 GN=CXorf56 PE=1 SV=1;sp|Q9H5V9-3|CX056-3_HUMAN Isoform of Q9H5V9, Isoform 3 of UPF0428 protein CXorf56 OS=Homo sapiens OX=9606 GN=CXorf56 PE=1 SV=1;sp	3	1	1	1	8.1	8.1	8.1	19.981	173	173;208;222	0.0020733	7.102	NaN	NaN	NaN	1	0	Median	276470	132420	144060	NAPVTFIVDGAVVK				1567	6022	TRUE	6493	9208	13992;13993	13993			9606;9606;9606
OBFC1	CST complex subunit STN1	NaN	Q9H668	Q9H668	2	2	2	sp|Q9H668|STN1_HUMAN CST complex subunit STN1 OS=Homo sapiens OX=9606 GN=STN1 PE=1 SV=2	1	2	2	2	6.2	6.2	6.2	42.119	368	368	0	11.761	NaN	NaN	NaN	1	0	Median	213370	97971	115400	LNTESVSAAPSAAR;NAIQLLQEK				1568	5266;6014	True;True	5593;6484	7997;9197	12181;13975	12181;13975			9606
C6orf106	Uncharacterized protein C6orf106	NaN	Q9H6K1-2;Q9H6K1	Q9H6K1-2;Q9H6K1	1;1	1;1	1;1	sp|Q9H6K1-2|ILRUN-2_HUMAN Isoform of Q9H6K1, Isoform 2 of Protein ILRUN OS=Homo sapiens OX=9606 GN=ILRUN PE=1 SV=2;sp|Q9H6K1|ILRUN_HUMAN Protein ILRUN OS=Homo sapiens OX=9606 GN=ILRUN PE=1 SV=2	2	1	1	1	6	6	6	25.673	232	232;298	1	-2	NaN	NaN	NaN	1	0	Median	506100	260640	245460	EGMDVDLDPELMQK	+			1570	1857	TRUE	1983	2834	4333	4333	1109;1110	4;13	9606;9606
DCTPP1	dCTP pyrophosphatase 1	NaN	Q9H773	Q9H773	1	1	1	sp|Q9H773|DCTP1_HUMAN dCTP pyrophosphatase 1 OS=Homo sapiens OX=9606 GN=DCTPP1 PE=1 SV=1	1	1	1	1	7.6	7.6	7.6	18.681	170	170	0.0014717	9.0762	NaN	NaN	NaN	1	0	Median	342110	225640	116480	GDTGGEDTAAPGR				1572	2879	TRUE	3062	4334;4335	6662;6663;6664;6665	6663			9606
RPF2	Ribosome production factor 2 homolog	NaN	Q9H7B2	Q9H7B2	1	1	1	sp|Q9H7B2|RPF2_HUMAN Ribosome production factor 2 homolog OS=Homo sapiens OX=9606 GN=RPF2 PE=1 SV=2	1	1	1	1	4.2	4.2	4.2	35.582	306	306	0.0014482	8.0085	NaN	NaN	NaN	1	0	Median	485300	290070	195230	NISHDTFGTTYGR				1573	6147	TRUE	6622	9416	14322;14323	14322			9606
KAT8	Histone acetyltransferase KAT8	NaN	Q9H7Z6;Q9H7Z6-2	Q9H7Z6;Q9H7Z6-2	1;1	1;1	1;1	sp|Q9H7Z6|KAT8_HUMAN Histone acetyltransferase KAT8 OS=Homo sapiens OX=9606 GN=KAT8 PE=1 SV=2;sp|Q9H7Z6-2|KAT8-2_HUMAN Isoform of Q9H7Z6, Isoform 2 of Histone acetyltransferase KAT8 OS=Homo sapiens OX=9606 GN=KAT8 PE=1 SV=2	2	1	1	1	2.4	2.4	2.4	52.402	458	458;467	0.0056818	6.3825	NaN	NaN	NaN	1	0	Median	445830	247820	198010	YLSELAEQPER				1575	9451	TRUE	10139	14557	22223;22224	22224			9606;9606
GEMIN7	Gem-associated protein 7	NaN	Q9H840	Q9H840	1	1	1	sp|Q9H840|GEMI7_HUMAN Gem-associated protein 7 OS=Homo sapiens OX=9606 GN=GEMIN7 PE=1 SV=1	1	1	1	1	9.9	9.9	9.9	14.536	131	131	0.003876	6.524	NaN	NaN	NaN	1	0	Median	238960	150250	88703	MQTPVNIPVPVLR				1576	5937	TRUE	6389	9064	13772;13773	13773	1111	1	9606
CACYBP	Calcyclin-binding protein	NaN	Q9HB71-3;Q9HB71	Q9HB71-3;Q9HB71	1;1	1;1	1;1	sp|Q9HB71-3|CYBP-3_HUMAN Isoform of Q9HB71, Isoform 3 of Calcyclin-binding protein OS=Homo sapiens OX=9606 GN=CACYBP PE=1 SV=2;sp|Q9HB71|CYBP_HUMAN Calcyclin-binding protein OS=Homo sapiens OX=9606 GN=CACYBP PE=1 SV=2	2	1	1	1	5.9	5.9	5.9	21.228	185	185;228	0.0020921	7.2036	NaN	NaN	NaN	1	0	Median	812760	540050	272720	ISNYGWDQSDK				1583	4160	TRUE	4414	6289	9668	9668			9606;9606
SDF2L1	Stromal cell-derived factor 2-like protein 1	NaN	Q9HCN8	Q9HCN8	1	1	1	sp|Q9HCN8|SDF2L_HUMAN Stromal cell-derived factor 2-like protein 1 OS=Homo sapiens OX=9606 GN=SDF2L1 PE=1 SV=2	1	1	1	1	5.9	5.9	5.9	23.598	221	221	0.0050697	6.4116	NaN	NaN	NaN	1	0	Median	255570	101320	154240	TGAELVTCGSVLK				1585	7851	TRUE	8445	12083	18385	18385			9606
NOP10	H/ACA ribonucleoprotein complex subunit 3	NaN	Q9NPE3	Q9NPE3	1	1	1	sp|Q9NPE3|NOP10_HUMAN H/ACA ribonucleoprotein complex subunit 3 OS=Homo sapiens OX=9606 GN=NOP10 PE=1 SV=1	1	1	1	1	12.5	12.5	12.5	7.7059	64	64	1	-2	NaN	NaN	NaN	1	0	Median	756030	422140	333890	VLMTQQPR	+			1590	8801	TRUE	9448	13578	20701	20701	1118	56	9606
MTPAP	Poly(A) RNA polymerase, mitochondrial	NaN	Q9NVV4-2;Q9NVV4;Q5T852;A0A087WYC0	Q9NVV4-2;Q9NVV4	3;2;1;1	2;2;1;0	2;2;1;0	sp|Q9NVV4-2|PAPD1-2_HUMAN Isoform of Q9NVV4, Isoform 2 of Poly(A) RNA polymerase, mitochondrial OS=Homo sapiens OX=9606 GN=MTPAP PE=1 SV=1;sp|Q9NVV4|PAPD1_HUMAN Poly(A) RNA polymerase, mitochondrial OS=Homo sapiens OX=9606 GN=MTPAP PE=1 SV=1	4	3	2	2	4.5	3.1	3.1	78.832	712	712;582;219;286	0	11.733	NaN	NaN	NaN	1	0	Median	462700	262890	199820	EFQLTEENTK;LLELQELVLR;SPPILPTLDSLK				1609	1800;5058;7412	True;False;True	1925;5367;7982	2758;7680;11409	4210;11716;11717;17344;17345	4210;11716;17345			9606;9606;9606;9606
UGGT2	UDP-glucose:glycoprotein glucosyltransferase 2	NaN	Q9NYU1	Q9NYU1	3	1	1	sp|Q9NYU1|UGGG2_HUMAN UDP-glucose:glycoprotein glucosyltransferase 2 OS=Homo sapiens OX=9606 GN=UGGT2 PE=1 SV=4	1	3	1	1	1.8	0.7	0.7	174.73	1516	1516	0.0080197	6.2677	NaN	NaN	NaN	1	0	Median	300250	203080	97169	ANPGAWILR;INEENTAISR;NYLSPTFK				1619	642;4022;6438	False;True;False	685;4270;6946	952;6099;9926	1433;9395;15122;15123	1433;9395;15123			9606
CCDC59	Thyroid transcription factor 1-associated protein 26	NaN	Q9P031	Q9P031	1	1	1	sp|Q9P031|TAP26_HUMAN Thyroid transcription factor 1-associated protein 26 OS=Homo sapiens OX=9606 GN=CCDC59 PE=1 SV=2	1	1	1	1	4.6	4.6	4.6	28.669	241	241	0.0014006	7.2305	NaN	NaN	NaN	1	0	Median	587350	333950	253400	AQEEYEQIQAK				1624	702	TRUE	748	1060	1587;1588	1588			9606
CCDC88C	Protein Daple	NaN	Q9P219	Q9P219	1	1	1	sp|Q9P219|DAPLE_HUMAN Protein Daple OS=Homo sapiens OX=9606 GN=CCDC88C PE=1 SV=3	1	1	1	1	0.4	0.4	0.4	228.23	2028	2028	1	-2	NaN	NaN	NaN	0	0	Median	0	0	0	TTLAMKEEK	+			1627	8220	TRUE	8835	12667	19265	19265	1129	974	9606
VPS18	Vacuolar protein sorting-associated protein 18 homolog	NaN	Q9P253	Q9P253	1	1	1	sp|Q9P253|VPS18_HUMAN Vacuolar protein sorting-associated protein 18 homolog OS=Homo sapiens OX=9606 GN=VPS18 PE=1 SV=2	1	1	1	1	1.3	1.3	1.3	110.18	973	973	0.0014134	7.3549	NaN	NaN	NaN	1	1	Median	183540	134170	49376	EAEGGAATAGPSR				1628	1568	TRUE	1673	2379	3617	3617			9606
COPG2	Coatomer subunit gamma-2	NaN	Q9UBF2-2;Q9UBF2	Q9UBF2-2;Q9UBF2	2;2	1;1	1;1	sp|Q9UBF2-2|COPG2-2_HUMAN Isoform of Q9UBF2, Isoform 2 of Coatomer subunit gamma-2 OS=Homo sapiens OX=9606 GN=COPG2 PE=1 SV=1;sp|Q9UBF2|COPG2_HUMAN Coatomer subunit gamma-2 OS=Homo sapiens OX=9606 GN=COPG2 PE=1 SV=1	2	2	1	1	3.6	1.8	1.8	81.482	726	726;871	0.0079902	6.2319	NaN	NaN	NaN	1	0	Median	203620	140370	63248	SIPLAMAPVFEQK;VVVVQAISALCQK				1635	7226;9194	True;False	7780;9868	11093;14135	16865;21569	16865;21569			9606;9606
MORF4L1	Mortality factor 4-like protein 1	NaN	Q9UBU8-2;Q9UBU8;H0YNE0;H0YMJ0;H0YLJ3;B3KTM8	Q9UBU8-2;Q9UBU8;H0YNE0;H0YMJ0;H0YLJ3;B3KTM8	2;2;1;1;1;1	2;2;1;1;1;1	2;2;1;1;1;1	sp|Q9UBU8-2|MO4L1-2_HUMAN Isoform of Q9UBU8, Isoform 2 of Mortality factor 4-like protein 1 OS=Homo sapiens OX=9606 GN=MORF4L1 PE=1 SV=2;sp|Q9UBU8|MO4L1_HUMAN Mortality factor 4-like protein 1 OS=Homo sapiens OX=9606 GN=MORF4L1 PE=1 SV=2;tr|H0YNE0|H0YNE0_H	6	2	2	2	5.6	5.6	5.6	37.23	323	323;362;213;245;269;348	0	12.576	NaN	NaN	NaN	1	1	Median	379460	182320	197140	ANQEQYAEGK;MAPKQDPK				1639	643;5725	True;True	686;6073	953;8641	1434;13146	1434;13146	1135	1	9606;9606;9606;9606;9606;9606
DMBT1	Deleted in malignant brain tumors 1 protein	NaN	Q9UGM3-9;Q9UGM3-4;Q9UGM3-8;Q9UGM3-2;Q9UGM3-5;Q9UGM3-3;Q9UGM3;Q9UGM3-7;Q9UGM3-6	Q9UGM3-9;Q9UGM3-4;Q9UGM3-8;Q9UGM3-2;Q9UGM3-5;Q9UGM3-3;Q9UGM3;Q9UGM3-7;Q9UGM3-6	2;2;2;2;2;2;2;2;2	2;2;2;2;2;2;2;2;2	2;2;2;2;2;2;2;2;2	sp|Q9UGM3-9|DMBT1-9_HUMAN Isoform of Q9UGM3, Isoform 9 of Deleted in malignant brain tumors 1 protein OS=Homo sapiens OX=9606 GN=DMBT1 PE=1 SV=2;sp|Q9UGM3-4|DMBT1-4_HUMAN Isoform of Q9UGM3, Isoform 4 of Deleted in malignant brain tumors 1 protein OS=Homo s	9	2	2	2	3.8	3.8	3.8	124.45	1133	1133;1527;1662;1785;2393;2403;2413;2532;2542	0	11.749	NaN	NaN	NaN	1	1	Median	1043900	1030500	13375	FGQGSGPIVLDDVR;QLGCGWATSAPGNAR				1644	2551;6702	True;True	2713;7228	3853;10325	5924;15735	5924;15735			9606;9606;9606;9606;9606;9606;9606;9606;9606
PPP1R9A	Neurabin-1	NaN	Q9ULJ8-2;Q9ULJ8;Q9ULJ8-4;Q9ULJ8-5;Q9ULJ8-3	Q9ULJ8-2;Q9ULJ8;Q9ULJ8-4;Q9ULJ8-5;Q9ULJ8-3	1;1;1;1;1	1;1;1;1;1	1;1;1;1;1	sp|Q9ULJ8-2|NEB1-2_HUMAN Isoform of Q9ULJ8, Isoform 2 of Neurabin-1 OS=Homo sapiens OX=9606 GN=PPP1R9A PE=1 SV=2;sp|Q9ULJ8|NEB1_HUMAN Neurabin-1 OS=Homo sapiens OX=9606 GN=PPP1R9A PE=1 SV=2;sp|Q9ULJ8-4|NEB1-4_HUMAN Isoform of Q9ULJ8, Isoform 4 of Neurabin-	5	1	1	1	2.6	2.6	2.6	43.095	387	387;1098;1253;1296;1374	1	-2	NaN	NaN	NaN	1	1	Median	3014100	2939700	74355	RKEQEQMQRK	+			1656	6876	TRUE	7405	10584	16108	16108	1149	366	9606;9606;9606;9606;9606
SNX6	Sorting nexin-6;Sorting nexin-6, N-terminally processed	NaN	Q9UNH7-2	Q9UNH7-2	5	1	1	sp|Q9UNH7-2|SNX6-2_HUMAN Isoform of Q9UNH7, Isoform 2 of Sorting nexin-6 OS=Homo sapiens OX=9606 GN=SNX6 PE=1 SV=1	1	5	1	1	15.5	3.1	3.1	33.57	290	290	1	-2	NaN	NaN	NaN	1	1	Median	576960	22505	554450	DVDDFFEHER;NLVELAELELK;TKEEFTKMK;VSADEDLK;VSELFDK	+			1663	1474;6239;7960;9001;9015	False;False;True;False;False	1577;6720;8560;9666;9680	2236;9559;12255;13862;13879	3393;3394;14534;18667;21160;21161;21187;21188	3393;14534;18667;21161;21187	1150	9	9606
WDR3	WD repeat-containing protein 3	NaN	Q9UNX4	Q9UNX4	1	1	1	sp|Q9UNX4|WDR3_HUMAN WD repeat-containing protein 3 OS=Homo sapiens OX=9606 GN=WDR3 PE=1 SV=1	1	1	1	1	1.1	1.1	1.1	106.1	943	943	0.003881	6.5364	NaN	NaN	NaN	1	0	Median	279730	166420	113310	DAITQALFLR				1667	1057	TRUE	1125	1610	2437	2437			9606
CARHSP1	Calcium-regulated heat stable protein 1	NaN	Q9Y2V2	Q9Y2V2	1	1	1	sp|Q9Y2V2|CHSP1_HUMAN Calcium-regulated heat-stable protein 1 OS=Homo sapiens OX=9606 GN=CARHSP1 PE=1 SV=2	1	1	1	1	10.9	10.9	10.9	15.892	147	147	0.0032744	6.6218	NaN	NaN	NaN	1	1	Median	251550	144230	107320	LQAVEVVITHLAPGTK				1685	5321	TRUE	5649	8072	12302	12302			9606
KNSTRN	Small kinetochore-associated protein	NaN	V9GY01;Q9Y448-2;Q9Y448	V9GY01;Q9Y448-2;Q9Y448	1;1;1	1;1;1	1;1;1	tr|V9GY01|V9GY01_HUMAN Isoform of Q9Y448, Chromosome 15 open reading frame 23, isoform CRA_d OS=Homo sapiens OX=9606 GN=KNSTRN PE=1 SV=1;sp|Q9Y448-2|SKAP-2_HUMAN Isoform of Q9Y448, Isoform 2 of Small kinetochore-associated protein OS=Homo sapiens OX=9606 G	3	1	1	1	5.9	5.9	5.9	26.983	238	238;286;316	0.0020633	7.0242	NaN	NaN	NaN	1	0	Median	183510	79910	103600	GLDPALGSETLASR				1701	3099	TRUE	3292	4670	7168;7169;7170	7169			9606;9606;9606
YTHDF2	YTH domain-containing family protein 2	NaN	S4R3J8;S4R3V3;Q9Y5A9	S4R3J8;S4R3V3;Q9Y5A9	1;1;1	1;1;1	1;1;1	tr|S4R3J8|S4R3J8_HUMAN Isoform of Q9Y5A9, YTH domain-containing family protein 2 (Fragment) OS=Homo sapiens OX=9606 GN=YTHDF2 PE=1 SV=1;tr|S4R3V3|S4R3V3_HUMAN Isoform of Q9Y5A9, YTH domain-containing family protein 2 (Fragment) OS=Homo sapiens OX=9606 GN=Y	3	1	1	1	5.5	5.5	5.5	21.034	200	200;241;579	0.0014493	8.0202	NaN	NaN	NaN	1	0	Median	522620	279420	243200	SASSLLEQRPK				1706	6980	TRUE	7517	10741	16338;16339	16339			9606;9606;9606
PCDHGB1	Protocadherin gamma-B1	NaN	Q9Y5G3-2;Q9Y5G3	Q9Y5G3-2;Q9Y5G3	1;1	1;1	1;1	sp|Q9Y5G3-2|PCDGD-2_HUMAN Isoform of Q9Y5G3, Isoform 2 of Protocadherin gamma-B1 OS=Homo sapiens OX=9606 GN=PCDHGB1 PE=2 SV=1;sp|Q9Y5G3|PCDGD_HUMAN Protocadherin gamma-B1 OS=Homo sapiens OX=9606 GN=PCDHGB1 PE=2 SV=1	2	1	1	1	1.2	1.2	1.2	88.171	810	810;927	1	-2	NaN	NaN	NaN	0	0	Median	0	0	0	QRAREAEMMK	+			1709	6777	TRUE	7304	10420	15870	15870	1195;1196	9;10	9606;9606
CD2AP	CD2-associated protein	NaN	Q9Y5K6	Q9Y5K6	1	1	1	sp|Q9Y5K6|CD2AP_HUMAN CD2-associated protein OS=Homo sapiens OX=9606 GN=CD2AP PE=1 SV=1	1	1	1	1	2	2	2	71.45	639	639	0.0020576	7.0127	NaN	NaN	NaN	1	0	Median	291450	166820	124630	ANTTAFLTPLEIK				1710	647	TRUE	690	960	1442;1443;1444	1444			9606
USP16	Ubiquitin carboxyl-terminal hydrolase 16	NaN	Q9Y5T5-5;Q9Y5T5-3;Q9Y5T5-2;Q9Y5T5	Q9Y5T5-5;Q9Y5T5-3;Q9Y5T5-2;Q9Y5T5	1;1;1;1	1;1;1;1	1;1;1;1	sp|Q9Y5T5-5|UBP16-5_HUMAN Isoform of Q9Y5T5, Isoform 5 of Ubiquitin carboxyl-terminal hydrolase 16 OS=Homo sapiens OX=9606 GN=USP16 PE=1 SV=1;sp|Q9Y5T5-3|UBP16-3_HUMAN Isoform of Q9Y5T5, Isoform 3 of Ubiquitin carboxyl-terminal hydrolase 16 OS=Homo sapiens	4	1	1	1	2.9	2.9	2.9	46.599	408	408;808;822;823	0.0038961	6.5635	NaN	NaN	NaN	1	0	Median	372590	200280	172310	GYQQQDSQELLR				1712	3418	TRUE	3623	5154	7923	7923			9606;9606;9606;9606
PSAT1	Phosphoserine aminotransferase	NaN	Q9Y617-2;Q9Y617	Q9Y617-2;Q9Y617	1;1	1;1	1;1	sp|Q9Y617-2|SERC-2_HUMAN Isoform of Q9Y617, Isoform 2 of Phosphoserine aminotransferase OS=Homo sapiens OX=9606 GN=PSAT1 PE=1 SV=2;sp|Q9Y617|SERC_HUMAN Phosphoserine aminotransferase OS=Homo sapiens OX=9606 GN=PSAT1 PE=1 SV=2	2	1	1	1	3.1	3.1	3.1	35.188	324	324;370	0.0080099	6.2617	NaN	NaN	NaN	1	1	Median	767470	632140	135330	ELLAVPDNYK				1714	2050	TRUE	2185	3128	4809	4809			9606;9606
AK5	Adenylate kinase isoenzyme 5	NaN	Q9Y6K8	Q9Y6K8	1	1	1	sp|Q9Y6K8|KAD5_HUMAN Adenylate kinase isoenzyme 5 OS=Homo sapiens OX=9606 GN=AK5 PE=1 SV=2	1	1	1	1	2	2	2	63.332	562	562	0.0033245	6.6939	NaN	NaN	NaN	1	0	Median	620990	345040	275940	NTNDAKEYLAR				1717	6384	TRUE	6892	9851	15007	15007			9606
WASF2	Wiskott-Aldrich syndrome protein family member 2	NaN	Q9Y6W5-2;Q9Y6W5	Q9Y6W5-2;Q9Y6W5	1;1	1;1	1;1	sp|Q9Y6W5-2|WASF2-2_HUMAN Isoform of Q9Y6W5, Isoform 2 of Wiskott-Aldrich syndrome protein family member 2 OS=Homo sapiens OX=9606 GN=WASF2 PE=1 SV=3;sp|Q9Y6W5|WASF2_HUMAN Wiskott-Aldrich syndrome protein family member 2 OS=Homo sapiens OX=9606 GN=WASF2 PE	2	1	1	1	4.3	4.3	4.3	31.979	281	281;498	0.0014347	7.6468	NaN	NaN	NaN	1	0	Median	539140	332990	206140	EEEVSLQGINTR				1720	1747	TRUE	1865	2677	4087;4088;4089	4088			9606;9606
		NaN	REV__E9PP85;REV__O94851-2;REV__O94851-5;REV__Q7RTP6-2;REV__O94851-6;REV__Q7RTP6-4;REV__Q7RTP6-3;REV__O94851-4;REV__Q7RTP6-5;REV__O94851-3;REV__O94851;REV__A0A2R8YFA9;REV__Q7RTP6	REV__E9PP85;REV__O94851-2;REV__O94851-5;REV__Q7RTP6-2;REV__O94851-6;REV__Q7RTP6-4;REV__Q7RTP6-3;REV__O94851-4;REV__Q7RTP6-5;REV__O94851-3;REV__O94851;REV__A0A2R8YFA9;REV__Q7RTP6	1;1;1;1;1;1;1;1;1;1;1;1;1	1;1;1;1;1;1;1;1;1;1;1;1;1	1;1;1;1;1;1;1;1;1;1;1;1;1	tr|E9PP85|E9PP85_HUMAN Isoform of Q7RTP6, [F-actin]-monooxygenase MICAL3 OS=Homo sapiens OX=9606 GN=MICAL3 PE=1 SV=1;sp|O94851-2|MICA2-2_HUMAN Isoform of O94851, Isoform 2 of [F-actin]-monooxygenase MICAL2 OS=Homo sapiens OX=9606 GN=MICAL2 PE=1 SV=1;sp|O94	13	1	1	1	0	0	0	37.781	335	335;784;934;948;955;966;976;976;1073;1103;1124;1957;2002	0.0033311	6.7124	NaN	NaN	NaN	1	0	Median	399500	151000	248500	NNIFNATIAIAK		+		1722	6264	TRUE	6755	9633	14639;14640	14640			9606;9606;9606;9606;9606;9606;9606;9606;9606;9606;9606;9606;9606
		NaN	REV__A0A2R8YFJ4;REV__H0Y4W2;REV__Q9Y4A5-2;REV__F2Z2U4;REV__Q9Y4A5	REV__A0A2R8YFJ4;REV__H0Y4W2;REV__Q9Y4A5-2;REV__F2Z2U4;REV__Q9Y4A5	1;1;1;1;1	1;1;1;1;1	1;1;1;1;1	tr|A0A2R8YFJ4|A0A2R8YFJ4_HUMAN Isoform of Q9Y4A5, Transformation/transcription domain-associated protein (Fragment) OS=Homo sapiens OX=9606 GN=TRRAP PE=1 SV=1;tr|H0Y4W2|H0Y4W2_HUMAN Isoform of Q9Y4A5, Transformation/transcription domain-associated protein	5	1	1	1	0	0	0	153.54	1344	1344;3588;3830;3848;3859	1	-2	NaN	NaN	NaN	1	0	Median	263650	163870	99774	SPVMNSQVK	+	+		1723	7429	TRUE	7999	11431	17384	17384	1197	215	9606;9606;9606;9606;9606
		NaN	REV__O95785-2;REV__B9EGQ5;REV__O95785-4;REV__O95785-3;REV__M0QXA7;REV__O95785;REV__A0A2R8YFV2	REV__O95785-2;REV__B9EGQ5;REV__O95785-4;REV__O95785-3;REV__M0QXA7;REV__O95785;REV__A0A2R8YFV2	1;1;1;1;1;1;1	1;1;1;1;1;1;1	1;1;1;1;1;1;1	sp|O95785-2|WIZ-2_HUMAN Isoform of O95785, Isoform 2 of Protein Wiz OS=Homo sapiens OX=9606 GN=WIZ PE=1 SV=2;tr|B9EGQ5|B9EGQ5_HUMAN Isoform of O95785, Protein Wiz OS=Homo sapiens OX=9606 GN=WIZ PE=1 SV=1;sp|O95785-4|WIZ-4_HUMAN Isoform of O95785, Isoform 4	7	1	1	1	0	0	0	85.379	794	794;832;835;965;968;1651;1699	1	-2	NaN	NaN	NaN	1	0	Median	202030	117580	84456	SAELSSGPGAGGMK	+	+		1724	6948	TRUE	7483	10698	16269	16269	1198	538	9606;9606;9606;9606;9606;9606;9606
		NaN	REV__C9JSQ1;REV__F8WCN3;REV__P12532;REV__P12532-2	REV__C9JSQ1;REV__F8WCN3;REV__P12532;REV__P12532-2	1;1;1;1	1;1;1;1	1;1;1;1	tr|C9JSQ1|C9JSQ1_HUMAN Isoform of P12532, Creatine kinase U-type, mitochondrial (Fragment) OS=Homo sapiens OX=9606 GN=CKMT1B PE=1 SV=1;tr|F8WCN3|F8WCN3_HUMAN Isoform of P12532, Creatine kinase U-type, mitochondrial OS=Homo sapiens OX=9606 GN=CKMT1A PE=1 SV	4	1	1	1	0	0	0	26.721	241	241;298;417;448	0.0074953	6.3326	NaN	NaN	NaN	1	0	Median	574770	302950	271830	GLGSLADVVR		+		1725	3117	TRUE	3311	4691	7205	7205			9606;9606;9606;9606
		NaN	REV__P78559;REV__P78559-2;REV__E9PGC8	REV__P78559;REV__P78559-2;REV__E9PGC8	1;1;1	1;1;1	1;1;1	sp|P78559|MAP1A_HUMAN Microtubule-associated protein 1A OS=Homo sapiens OX=9606 GN=MAP1A PE=1 SV=6;sp|P78559-2|MAP1A-2_HUMAN Isoform of P78559, Isoform 2 of Microtubule-associated protein 1A OS=Homo sapiens OX=9606 GN=MAP1A PE=1 SV=6;tr|E9PGC8|E9PGC8_HUMAN	3	1	1	1	0	0	0	305.48	2803	2803;2805;3041	0.0020979	7.2165	NaN	NaN	NaN	1	0	Median	13980000	7062200	6918300	PLNTPVAGSALK		+		1726	6503	TRUE	7012	10021	15285	15285			9606;9606;9606
		NaN	REV__Q12849-5;REV__H0Y8R1;REV__F5H5I6;REV__H0YAK1;REV__Q12849	REV__Q12849-5;REV__H0Y8R1;REV__F5H5I6;REV__H0YAK1;REV__Q12849	1;1;1;1;1	1;1;1;1;1	1;1;1;1;1	sp|Q12849-5|GRSF1-5_HUMAN Isoform of Q12849, Isoform 2 of G-rich sequence factor 1 OS=Homo sapiens OX=9606 GN=GRSF1 PE=1 SV=3;tr|H0Y8R1|H0Y8R1_HUMAN Isoform of Q12849, G-rich sequence factor 1 (Fragment) OS=Homo sapiens OX=9606 GN=GRSF1 PE=1 SV=1;tr|F5H5I6	5	1	1	1	0	0	0	36.613	318	318;417;424;453;480	0.0091408	6.1681	NaN	NaN	NaN	1	0	Median	404720	256390	148330	AGSSSYEMTR		+		1727	350	TRUE	368	500	754	754	1199	50	9606;9606;9606;9606;9606
		NaN	REV__F5H7P8	REV__F5H7P8	1	1	1	tr|F5H7P8|F5H7P8_HUMAN Isoform of Q53HC0, Coiled-coil domain-containing protein 92 (Fragment) OS=Homo sapiens OX=9606 GN=CCDC92 PE=1 SV=1	1	1	1	1	0	0	0	10.833	96	96	0.0097324	6.145	NaN	NaN	NaN	1	0	Median	15550000	10091000	5458900	LQAELEER		+		1728	5313	TRUE	5641	8061	12287	12287			9606
		NaN	REV__H0Y9I8;REV__Q9H799	REV__H0Y9I8;REV__Q9H799	1;1	1;1	1;1	tr|H0Y9I8|H0Y9I8_HUMAN Isoform of Q9H799, Ciliogenesis and planar polarity effector 1 (Fragment) OS=Homo sapiens OX=9606 GN=CPLANE1 PE=1 SV=1;sp|Q9H799|CPLN1_HUMAN Ciliogenesis and planar polarity effector 1 OS=Homo sapiens OX=9606 GN=CPLANE1 PE=1 SV=4	2	1	1	1	0	0	0	255.48	2263	2263;3197	1	-2	NaN	NaN	NaN	0	0	Median	135110	135110	0	DEKHKMRQR	+	+		1729	1112	TRUE	1184	1697	2564	2564	1200	253	9606;9606
		NaN	REV__H3BS70;REV__Q96DC0;REV__P42126-2;REV__P42126	REV__H3BS70;REV__Q96DC0;REV__P42126-2;REV__P42126	1;1;1;1	1;1;1;1	1;1;1;1	tr|H3BS70|H3BS70_HUMAN Isoform of P42126, Enoyl-CoA delta isomerase 1, mitochondrial (Fragment) OS=Homo sapiens OX=9606 GN=ECI1 PE=1 SV=1;tr|Q96DC0|Q96DC0_HUMAN Isoform of P42126, DCI protein OS=Homo sapiens OX=9606 GN=ECI1 PE=1 SV=1;sp|P42126-2|ECI1-2_HUM	4	1	1	1	0	0	0	24.704	224	224;243;285;302	0.0014793	9.5488	NaN	NaN	NaN	1	0	Median	241490	112010	129480	IYDCTLAVLCGGAPCAGNIASVLVLNSQYRLLWLEQVK		+		1730	4267	TRUE	4528	6460	9941	9941			9606;9606;9606;9606
		NaN	REV__M0R149;REV__Q96QH2	REV__M0R149;REV__Q96QH2	1;1	1;1	1;1	tr|M0R149|M0R149_HUMAN Isoform of Q96QH2, PML-RARA-regulated adapter molecule 1 (Fragment) OS=Homo sapiens OX=9606 GN=PRAM1 PE=1 SV=1;sp|Q96QH2|PRAM_HUMAN PML-RARA-regulated adapter molecule 1 OS=Homo sapiens OX=9606 GN=PRAM1 PE=1 SV=3	2	1	1	1	0	0	0	19.674	180	180;670	0.0056962	6.4065	NaN	NaN	NaN	1	0	Median	3504600	1871000	1633600	KPPLDTVEPPPK		+		1731	4414	TRUE	4686	6690	10260	10260			9606;9606
		NaN	REV__O95256-2;REV__O95256	REV__O95256-2;REV__O95256	1;1	1;1	1;1	sp|O95256-2|I18RA-2_HUMAN Isoform of O95256, Isoform 2 of Interleukin-18 receptor accessory protein OS=Homo sapiens OX=9606 GN=IL18RAP PE=1 SV=1;sp|O95256|I18RA_HUMAN Interleukin-18 receptor accessory protein OS=Homo sapiens OX=9606 GN=IL18RAP PE=1 SV=1	2	1	1	1	0	0	0	51.944	457	457;599	0.003919	6.6054	NaN	NaN	NaN	1	0	Median	632990	377070	255920	SIKSAEPVSVEWELDSK		+		1732	7212	TRUE	7766	11076	16840	16840			9606;9606
		NaN	REV__P19838-3;REV__P19838;REV__P19838-2	REV__P19838-3;REV__P19838;REV__P19838-2	1;1;1	1;1;1	1;1;1	sp|P19838-3|NFKB1-3_HUMAN Isoform of P19838, Isoform 3 of Nuclear factor NF-kappa-B p105 subunit OS=Homo sapiens OX=9606 GN=NFKB1 PE=1 SV=2;sp|P19838|NFKB1_HUMAN Nuclear factor NF-kappa-B p105 subunit OS=Homo sapiens OX=9606 GN=NFKB1 PE=1 SV=2;sp|P19838-2|	3	1	1	1	0	0	0	85.519	788	788;968;969	0.0044901	6.4831	NaN	NaN	NaN	1	0	Median	187570	83685	103890	LDLLSLDAGR		+		1733	4635	TRUE	4918	7026	10761	10761			9606;9606;9606
		NaN	REV__P29536-2;REV__P29536	REV__P29536-2;REV__P29536	1;1	1;1	1;1	sp|P29536-2|LMOD1-2_HUMAN Isoform of P29536, Isoform 2 of Leiomodin-1 OS=Homo sapiens OX=9606 GN=LMOD1 PE=1 SV=3;sp|P29536|LMOD1_HUMAN Leiomodin-1 OS=Homo sapiens OX=9606 GN=LMOD1 PE=1 SV=3	2	1	1	1	0	0	0	63.783	572	572;600	1	-2	NaN	NaN	NaN	1	0	Median	2287500	965220	1322300	LAIEMEK	+	+		1734	4536	TRUE	4814	6882	10530	10530	1201	166	9606;9606
		NaN	REV__P34130	REV__P34130	1	1	1	sp|P34130|NTF4_HUMAN Neurotrophin-4 OS=Homo sapiens OX=9606 GN=NTF4 PE=1 SV=1	1	1	1	1	0	0	0	22.426	210	210	0.0068793	6.3356	NaN	NaN	NaN	1	0	Median	1130500	617830	512690	VGQADATLR		+		1736	8604	TRUE	9242	13268	20241	20241			9606
		NaN	REV__Q2M3G0-1;REV__Q2M3G0	REV__Q2M3G0-1;REV__Q2M3G0	1;1	1;1	1;1	sp|Q2M3G0-1|ABCB5-1_HUMAN Isoform of Q2M3G0, Isoform 1 of ATP-binding cassette sub-family B member 5 OS=Homo sapiens OX=9606 GN=ABCB5 PE=2 SV=4;sp|Q2M3G0|ABCB5_HUMAN ATP-binding cassette sub-family B member 5 OS=Homo sapiens OX=9606 GN=ABCB5 PE=1 SV=4	2	1	1	1	0	0	0	89.83	812	812;1257	0.0080946	6.3211	NaN	NaN	NaN	1	0	Median	1105600	607000	498590	LMTLIEGR		+		1737	5219	TRUE	5543	7910	12056	12056	1202	492	9606;9606
		NaN	REV__Q6PCB5	REV__Q6PCB5	1	1	1	sp|Q6PCB5|RSBNL_HUMAN Round spermatid basic protein 1-like protein OS=Homo sapiens OX=9606 GN=RSBN1L PE=1 SV=2	1	1	1	1	0	0	0	94.868	846	846	0.0062854	6.3509	NaN	NaN	NaN	1	0	Median	3992800	2014700	1978100	VIQLDEINK		+		1739	8678	TRUE	9320	13378	20405	20405			9606
		NaN	REV__Q96E11-7;REV__X6RDS5;REV__Q96E11-5;REV__Q96E11-6;REV__Q96E11-4;REV__Q96E11-2;REV__Q96E11-8;REV__Q96E11-3;REV__Q96E11	REV__Q96E11-7;REV__X6RDS5;REV__Q96E11-5;REV__Q96E11-6;REV__Q96E11-4;REV__Q96E11-2;REV__Q96E11-8;REV__Q96E11-3;REV__Q96E11	1;1;1;1;1;1;1;1;1	1;1;1;1;1;1;1;1;1	1;1;1;1;1;1;1;1;1	sp|Q96E11-7|RRFM-7_HUMAN Isoform of Q96E11, Isoform 7 of Ribosome-recycling factor, mitochondrial OS=Homo sapiens OX=9606 GN=MRRF PE=1 SV=1;tr|X6RDS5|X6RDS5_HUMAN Isoform of Q96E11, Ribosome-recycling factor, mitochondrial (Fragment) OS=Homo sapiens OX=960	9	1	1	1	0	0	0	13.604	124	124;153;158;168;176;201;210;218;262	0.0050729	6.4125	NaN	NaN	NaN	1	0	Median	2971400	1727200	1244200	LGDATVVAK		+		1740	4827	TRUE	5124	7320	11188	11188			9606;9606;9606;9606;9606;9606;9606;9606;9606
		NaN	REV__Q96KN9	REV__Q96KN9	1	1	1	sp|Q96KN9|CXD4_HUMAN Gap junction delta-4 protein OS=Homo sapiens OX=9606 GN=GJD4 PE=2 SV=1	1	1	1	1	0	0	0	40.14	370	370	1	-2	NaN	NaN	NaN	1	0	Median	2230500	1259200	971250	MLLMTLVFWK	+	+		1741	5870	TRUE	6290	8939	13604	13604	1204;1205	338;341	9606
		NaN	REV__Q9UDT6-2;REV__Q9UDT6	REV__Q9UDT6-2;REV__Q9UDT6	1;1	1;1	1;1	sp|Q9UDT6-2|CLIP2-2_HUMAN Isoform of Q9UDT6, Isoform 2 of CAP-Gly domain-containing linker protein 2 OS=Homo sapiens OX=9606 GN=CLIP2 PE=1 SV=1;sp|Q9UDT6|CLIP2_HUMAN CAP-Gly domain-containing linker protein 2 OS=Homo sapiens OX=9606 GN=CLIP2 PE=1 SV=1	2	1	1	1	0	0	0	111.78	1011	1011;1046	1	-2	NaN	NaN	NaN	1	0	Median	408820	230410	178420	MEALSIQK	+	+		1743	5764	TRUE	6129	8708	13265	13265	1206	286	9606;9606
		NaN	REV__Q9UN73-3;REV__Q9UN73	REV__Q9UN73-3;REV__Q9UN73	1;1	1;1	1;1	sp|Q9UN73-3|PCDA6-3_HUMAN Isoform of Q9UN73, Isoform 3 of Protocadherin alpha-6 OS=Homo sapiens OX=9606 GN=PCDHA6 PE=2 SV=1;sp|Q9UN73|PCDA6_HUMAN Protocadherin alpha-6 OS=Homo sapiens OX=9606 GN=PCDHA6 PE=2 SV=1	2	1	1	1	0	0	0	86.844	803	803;950	0.0026667	6.721	NaN	NaN	NaN	1	0	Median	1276200	782730	493500	VAVVQGAGLR		+		1744	8423	TRUE	9049	12977	19763	19763			9606;9606
		NaN	REV__Q9UPU5	REV__Q9UPU5	1	1	1	sp|Q9UPU5|UBP24_HUMAN Ubiquitin carboxyl-terminal hydrolase 24 OS=Homo sapiens OX=9606 GN=USP24 PE=1 SV=3	1	1	1	1	0	0	0	294.36	2620	2620	1	-2	NaN	NaN	NaN	1	0	Median	1134900	543530	591400	VAMCPYYPK	+	+		1745	8382	TRUE	9006	12911	19642	19642	1207	460	9606
CROT	Peroxisomal carnitine O-octanoyltransferase	392.72	C9J3D7;Q9UKG9;Q9UKG9-3	C9J3D7;Q9UKG9;Q9UKG9-3	1;1;1	1;1;1	1;1;1	tr|C9J3D7|C9J3D7_HUMAN Isoform of Q9UKG9, Peroxisomal carnitine O-octanoyltransferase OS=Homo sapiens OX=9606 GN=CROT PE=1 SV=1;sp|Q9UKG9|OCTC_HUMAN Peroxisomal carnitine O-octanoyltransferase OS=Homo sapiens OX=9606 GN=CROT PE=1 SV=2;sp|Q9UKG9-3|OCTC-3_HU	3	1	1	1	2.3	2.3	2.3	65.883	574	574;612;640	1	-2	389.35	392.72	110.67	2	2	Median	73997000	147060	73850000	WCQSMQDPSVNLR	+			281	9233	TRUE	9908	14210;14211	21685;21686	21685	184	469	9606;9606;9606
COPS3	COP9 signalosome complex subunit 3	19.71	H7C3P9;Q9UNS2-2;Q9UNS2;K7ELN6	H7C3P9;Q9UNS2-2;Q9UNS2	5;5;5;1	5;5;5;1	5;5;5;1	tr|H7C3P9|H7C3P9_HUMAN Isoform of Q9UNS2, COP9 signalosome complex subunit 3 OS=Homo sapiens OX=9606 GN=COPS3 PE=1 SV=2;sp|Q9UNS2-2|CSN3-2_HUMAN Isoform of Q9UNS2, Isoform 2 of COP9 signalosome complex subunit 3 OS=Homo sapiens OX=9606 GN=COPS3 PE=1 SV=3;s	4	5	5	5	20.6	20.6	20.6	39.036	345	345;403;423;51	0	83.065	17	19.71	8.0988	12	1	Leave out requantified	60410000	3679200	56731000	AMDQEITVNPQFVQK;DGMVSFHDNPEK;SMGSQEDDSGNKPSSYS;VQLSGPQEAEK;YNNPAMLHNIDQEMLK				582	604;1169;7353;8978;9486	True;True;True;True;True	641;642;1246;1247;7913;7914;9641;10176;10177;10178	891;892;893;894;1776;1777;11319;11320;13835;14620;14621;14622	1341;1342;1343;1344;1345;1346;2679;2680;2681;17188;17189;17190;21119;21120;22327;22328;22329	1344;2679;17189;21119;22327	298;299;300;301;302	279;294;302;315;330	9606;9606;9606;9606
		19.687	REV__Q9NZP6	REV__Q9NZP6	1	1	1	sp|Q9NZP6|NPAP1_HUMAN Nuclear pore-associated protein 1 OS=Homo sapiens OX=9606 GN=NPAP1 PE=1 SV=2	1	1	1	1	0	0	0	120.95	1156	1156	0.0085418	6.1849	18.251	19.687	9.9627	3	0	Median	40128000	2121600	38006000	YSVSASQLIVK		+		1742	9541	TRUE	10237	14695;14696;14697	22444;22445;22446	22444			9606
		19.07	Q3MJ16-2	Q3MJ16-2	2	2	2	sp|Q3MJ16-2|PA24E-2_HUMAN Isoform of Q3MJ16, Isoform 2 of Cytosolic phospholipase A2 epsilon OS=Homo sapiens OX=9606 GN=PLA2G4E PE=4 SV=4	1	2	2	2	1.6	1.6	1.6	56.715	492	492	0	11.451	15.29	19.07	132.71	2	2	Median	1143700	71831	1071900	ATGGGTR;MATGGGTR				1285	846;5731	True;True	901;6082	1258;8654	1883;13169	1883;13169			9606
GFP		18.294	CON__Q9U6Y5	CON__Q9U6Y5	7	7	7		1	7	7	7	30.1	30.1	30.1	28.106	249	249	0	117.55	16.807	18.294	32.819	27	12	Leave out requantified	373030000	31099000	341930000	AEVKFEGDTLVNR;EDGNILGHK;FEGDTLVNR;FSVSGEGEGDATYGK;LEYNYNSHNVYIMADK;SAMPEGYVQER;TIFFKDDGNYK			+	331	266;1697;2504;2731;4760;6969;7929	True;True;True;True;True;True;True	282;1813;2664;2909;5051;5052;7505;7506;8528	379;2591;3788;3789;3790;3791;3792;3793;4124;4125;4126;4127;4128;4129;4130;4131;4132;7221;7222;7223;7224;7225;7226;7227;10724;10725;10726;10727;10728;10729;12196;12197	565;3954;5820;5821;5822;5823;5824;5825;5826;5827;5828;5829;5830;6330;6331;6332;6333;6334;6335;6336;6337;6338;6339;6340;6341;6342;6343;6344;11041;11042;11043;11044;11045;11046;11047;11048;11049;11050;16310;16311;16312;16313;16314;16315;16316;16317;16318;16319;16320;18560;18561	565;3954;5822;6342;11046;16311;18560	211;212	88;153	-1
COPS4	COP9 signalosome complex subunit 4	17.279	Q9BT78;D6RAX7;D6RFN0;Q9BT78-2;D6RD63;D6REK7	Q9BT78;D6RAX7;D6RFN0;Q9BT78-2;D6RD63	12;11;11;10;8;1	12;11;11;10;8;1	12;11;11;10;8;1	sp|Q9BT78|CSN4_HUMAN COP9 signalosome complex subunit 4 OS=Homo sapiens OX=9606 GN=COPS4 PE=1 SV=1;tr|D6RAX7|D6RAX7_HUMAN Isoform of Q9BT78, COP9 constitutive photomorphogenic-like protein subunit 4 isoform 2 OS=Homo sapiens OX=9606 GN=COPS4 PE=1 SV=1;tr|D	6	12	12	12	35.7	35.7	35.7	46.268	406	406;420;438;352;275;51	0	142.9	15.639	17.279	25.984	18	8	Leave out requantified	117530000	9294600	108230000	AIQLSGAEQLEALK;ATTADGSSILDR;AVIEHNLLSASK;CQQLAAYGILEK;EALPTWDK;EIYHFTLEK;GNQLQEFAAMLMPHQK;IASQMITEGR;MLATLFKDER;NAAQVLVGIPLETGQK;QDLAQLMNSSGSHK;VISFEEQVASIR				1521	423;875;924;1025;1609;1963;3185;3639;5856;5998;6590;8684	True;True;True;True;True;True;True;True;True;True;True;True	444;930;984;1091;1718;2094;3381;3854;3855;6266;6467;7108;7109;9326	617;1300;1301;1380;1381;1382;1545;2432;2991;4786;5491;5492;8901;9171;9172;9173;10152;10153;10154;13386	933;934;1946;1947;1948;1949;2070;2071;2072;2073;2324;2325;3697;4575;7343;8428;8429;8430;8431;13550;13933;13934;13935;13936;15488;15489;15490;20415;20416;20417;20418	934;1948;2073;2325;3697;4575;7343;8430;13550;13935;15490;20417	1091;1092;1093;1094	13;284;286;342	9606;9606;9606;9606;9606;9606
COPS2	COP9 signalosome complex subunit 2	17.057	P61201;P61201-2;B4DIH5;H0YKU5;H0YM03;H0YMC2	P61201;P61201-2;B4DIH5;H0YKU5	16;16;14;10;7;1	16;16;14;10;7;1	16;16;14;10;7;1	sp|P61201|CSN2_HUMAN COP9 signalosome complex subunit 2 OS=Homo sapiens OX=9606 GN=COPS2 PE=1 SV=1;sp|P61201-2|CSN2-2_HUMAN Isoform of P61201, Isoform 2 of COP9 signalosome complex subunit 2 OS=Homo sapiens OX=9606 GN=COPS2 PE=1 SV=1;tr|B4DIH5|B4DIH5_HUMAN	6	16	16	16	37.9	37.9	37.9	51.596	443	443;450;379;263;183;55	0	134.31	14.63	17.057	17.278	27	14	Leave out requantified	92823000	6932300	85891000	AALSSFQK;AHTDFFEAFK;ALYEQSLHIK;IDQVNQLLELDHQK;LYLEREEYGK;NYDESGSPR;QLHQSCQTDDGEDDLK;QLHQSCQTDDGEDDLKK;QLLTYIR;SAIPHPLIMGVIR;SGINPFDSQEAK;SGINPFDSQEAKPYK;SINSILDYISTSK;TNHSNIMDDPFIR;VLELEGEKGEWGFK;WTNQLNSLNQAVVSK				1071	83;374;598;3682;5690;6428;6704;6705;6714;6962;7161;7162;7225;8074;8747;9267	True;True;True;True;True;True;True;True;True;True;True;True;True;True;True;True	90;393;634;3901;6032;6936;7230;7231;7240;7497;7498;7709;7710;7779;8683;8684;9393;9944	114;115;535;536;537;878;879;5550;5551;5552;8587;8588;9913;9914;10327;10328;10340;10715;10716;11000;11001;11002;11003;11091;11092;12453;12454;12455;13489;13490;13491;14266;14267	180;181;182;808;809;810;811;1324;1325;8519;8520;8521;8522;13072;13073;15102;15103;15104;15737;15738;15753;16296;16297;16298;16728;16729;16730;16731;16732;16862;16863;16864;18941;18942;18943;18944;20566;20567;20568;21768;21769;21770	182;808;1324;8520;13072;15102;15737;15738;15753;16296;16730;16731;16863;18941;20567;21769	745;746	234;338	9606;9606;9606;9606;9606;9606
COPS7A	COP9 signalosome complex subunit 7a	16.44	F5H7C6;F5GYF7;F5H248;Q9UBW8;F5H4U8;F5H4Z0;F5H3M6;G3XAP1;F5GXT7	F5H7C6;F5GYF7;F5H248;Q9UBW8;F5H4U8	4;4;4;4;3;1;1;1;1	4;4;4;4;3;1;1;1;1	4;4;4;4;3;1;1;1;1	tr|F5H7C6|F5H7C6_HUMAN Isoform of Q9UBW8, COP9 signalosome complex subunit 7a (Fragment) OS=Homo sapiens OX=9606 GN=COPS7A PE=1 SV=1;tr|F5GYF7|F5GYF7_HUMAN Isoform of Q9UBW8, COP9 signalosome complex subunit 7a (Fragment) OS=Homo sapiens OX=9606 GN=COPS7A	9	4	4	4	21.9	21.9	21.9	21.306	192	192;212;262;275;125;56;60;62;71	0	26.808	14.4	16.44	12.432	4	1	Leave out requantified	15472000	2007400	13464000	HLSVVTLAAK;NLPPLTEAQK;QDLSAIAR;VTGQNQEQFLLLAK				453	3524;6211;6593;9070	True;True;True;True	3734;6690;7113;9736	5315;9519;10158;13960	8152;14468;14469;15497;21310	8152;14469;15497;21310			9606;9606;9606;9606;9606;9606;9606;9606;9606
COPS5	COP9 signalosome complex subunit 5	16.325	Q92905;E5RHH5;E5RHF2;E5RFS1;E5RG35;E5RK55	Q92905	10;4;2;1;1;1	10;4;2;1;1;1	10;4;2;1;1;1	sp|Q92905|CSN5_HUMAN COP9 signalosome complex subunit 5 OS=Homo sapiens OX=9606 GN=COPS5 PE=1 SV=4	6	10	10	10	33.8	33.8	33.8	37.578	334	334;197;151;57;68;78	0	110.96	13.282	16.325	152.53	19	12	Leave out requantified	32782000	3655000	29127000	AASGSGMAQK;GSFMLGLETHDR;GYKPPDEGPSEYQTIPLNK;IEDFGVHCK;ISALALLK;LEQSEAQLGR;LFNQINIS;LLELLWNK;SGGNLEVMGLMLGK;TTIEAIHGLMSQVIK				1448	113;3270;3413;3700;4118;4738;4793;5057;7159;8215	True;True;True;True;True;True;True;True;True;True	121;3469;3618;3919;4370;5026;5088;5366;7705;7706;7707;8830	147;148;4913;5149;5577;6223;7184;7185;7186;7272;7677;7678;7679;10994;10995;10996;10997;10998;12659;12660;12661	227;228;7544;7913;7914;8560;9569;10981;10982;10983;10984;10985;10986;10987;10988;11116;11713;11714;11715;16719;16720;16721;16722;16723;16724;16725;19254;19255;19256	227;7544;7913;8560;9569;10981;11116;11713;16722;19255	1053;1054;1055	78;81;319	9606;9606;9606;9606;9606;9606
DDB1	DNA damage-binding protein 1	15.819	Q16531;F5GY55;Q16531-2;F5GZY8;F5H2L3;F5GWI0;F5GYG8;F5H198	Q16531;F5GY55	42;37;17;8;8;7;5;3	42;37;17;8;8;7;5;3	42;37;17;8;8;7;5;3	sp|Q16531|DDB1_HUMAN DNA damage-binding protein 1 OS=Homo sapiens OX=9606 GN=DDB1 PE=1 SV=1;tr|F5GY55|F5GY55_HUMAN Isoform of Q16531, DNA damage-binding protein 1 OS=Homo sapiens OX=9606 GN=DDB1 PE=1 SV=1	8	42	42	42	37	37	37	126.97	1140	1140;1092;451;146;165;139;109;162	0	323.31	13.228	15.819	26.324	110	44	Leave out requantified	838000000	70366000	767630000	ALVSEWK;ALVSEWKEPQAK;ALYYLQIHPQELR;DLLFILTAK;DSAATTDEER;EATADDLIK;EEQMDGTVTLK;EMLGGEIIPR;GAVYSMVEFNGK;GDFILVGDLMR;IAVMELFRPK;IEHSFWR;IEVQDTSGGTTALR;IGRPSETGIIGIIDPECR;IVVFQYSDGK;KVTLGTQPTVLR;LEELHVIDVK;LEIYVVTAEGLRPVK;LFMLLLEK;LGDSQLVK;LLASINSTVR;LPSFELLHK;LVFSNVNLK;LYDGLFK;LYEWTTEK;MQEVVANLQYDDGSGMK;MQEVVANLQYDDGSGMKR;PSASTQALSSSVSSSK;PSETGIIGIIDPECR;QGQGQLVTCSGAFK;QSGESIDIITR;SLSTTNVFACSDRPTVIY…				1272	594;595;600;1282;1406;1647;1770;2128;2848;2866;3647;3727;3744;3816;4255;4466;4694;4709;4789;4830;5019;5297;5597;5672;5682;5926;5927;6524;6527;6645;6780;7333;7625;7671;7784;7966;8290;8321;9075;9130;9423;9441	True;True;True;True;True;True;True;True;True;True;True;True;True;True;True;True;True;True;True;True;True;True;True;True;True;True;True;True;True;True;True;True;True;True;True;True;True;True;True;True;True;True	630;631;636;1366;1507;1759;1893;1894;2266;2267;3030;3031;3049;3863;3947;3966;4040;4516;4743;4980;4997;5084;5127;5327;5625;5934;6013;6024;6370;6371;6372;6373;6374;6375;7038;7041;7168;7307;7891;8204;8253;8372;8373;8566;8909;8943;9741;9802;10107;10125;10126	871;872;873;874;875;881;882;883;884;885;1942;2141;2142;2143;2495;2496;2497;2498;2711;2712;2713;2714;2715;3227;3228;3229;3230;3231;3232;4290;4291;4292;4293;4294;4295;4296;4316;5503;5617;5618;5619;5651;5652;5653;5759;6439;6440;6441;6442;6443;6444;6778;7113;7114;7115;7116;7138;7139;7267;7323;7615;7616;7617;7618;7619;8042;8452;8453;8559;8574;8575;8576;8577;9035;9036;9037;9038;9039;9040;9041;9042;9043…	1317;1318;1319;1320;1321;1329;1330;1331;1332;1333;1334;1335;2932;3249;3250;3251;3252;3807;3808;3809;3810;3811;3812;3813;4143;4144;4145;4146;4147;4963;4964;4965;4966;4967;4968;4969;4970;4971;6595;6596;6597;6598;6599;6600;6601;6602;6635;8451;8634;8635;8636;8685;8686;8687;8856;9907;9908;9909;9910;9911;9912;9913;9914;10380;10884;10885;10886;10887;10916;10917;11107;11191;11624;11625;11626;11627;11628;…	1317;1321;1332;2932;3251;3808;4146;4967;6597;6635;8451;8636;8685;8856;9910;10380;10886;10917;11107;11191;11628;12253;12861;13028;13054;13740;13746;15337;15341;15607;15878;17129;17817;17929;18210;18677;19435;19513;21321;21444;22156;22187	959;960;961;962;963;964;965;966;967;968	276;282;291;581;873;910;927;938;1105;1120	9606;9606;9606;9606;9606;9606;9606;9606
COPS7B	COP9 signalosome complex subunit 7b	14.847	J3KQ34;Q9H9Q2;J3QT73;A0A087X1P5;Q9H9Q2-2;J3KQ41;Q9H9Q2-3	J3KQ34;Q9H9Q2;J3QT73;A0A087X1P5;Q9H9Q2-2	3;3;2;2;2;1;1	3;3;2;2;2;1;1	3;3;2;2;2;1;1	tr|J3KQ34|J3KQ34_HUMAN Isoform of Q9H9Q2, COP9 signalosome complex subunit 7b OS=Homo sapiens OX=9606 GN=COPS7B PE=1 SV=1;sp|Q9H9Q2|CSN7B_HUMAN COP9 signalosome complex subunit 7b OS=Homo sapiens OX=9606 GN=COPS7B PE=1 SV=1;tr|J3QT73|J3QT73_HUMAN Isoform o	7	3	3	3	19.1	19.1	19.1	26.424	230	230;264;172;209;157;278;273	0	88.969	12.556	14.847	66.426	6	3	Median	14098000	891020	13207000	ATASSSAQEMEQQLAER;ESLPELSTAQQNK;TQQQVEAEVTNIKK				602	828;2262;8141	True;True;True	878;879;2405;8751	1226;1227;1228;3425;12548;12549	1837;1838;1839;1840;1841;5263;5264;19095;19096	1837;5263;19096	310	197	9606;9606;9606;9606;9606;9606;9606
COPS6	COP9 signalosome complex subunit 6	14.736	Q7L5N1;E7EM64;H7C3T0	Q7L5N1;E7EM64	9;9;3	9;9;3	9;9;3	sp|Q7L5N1|CSN6_HUMAN COP9 signalosome complex subunit 6 OS=Homo sapiens OX=9606 GN=COPS6 PE=1 SV=1;tr|E7EM64|E7EM64_HUMAN Isoform of Q7L5N1, COP9 signalosome complex subunit 6 OS=Homo sapiens OX=9606 GN=COPS6 PE=1 SV=1	3	9	9	9	32.7	32.7	32.7	36.163	327	327;326;123	0	63.877	11.475	14.736	23.329	17	10	Leave out requantified	51042000	4473800	46568000	ASEAGEVPFNHEILR;FNVLYDR;IGVDHVAR;IIIDKEYYYTK;LILEYVK;MTATGSGENSTVAEHLIAQHSAIK;PVQVIGALIGK;QVCEIIESPLFLK;TCNTMNQFVNK				368	761;2663;3822;3867;4958;5958;6543;6811;7747	True;True;True;True;True;True;True;True;True	807;2839;4046;4093;5262;6412;6413;7057;7338;8333	1130;1131;1132;4025;5766;5833;5834;7514;7515;7516;9087;9088;9089;9090;9091;10083;10479;11919	1691;1692;1693;6179;6180;8866;8967;8968;11491;11492;11493;11494;13804;13805;13806;13807;13808;15381;15956;18125	1692;6179;8866;8968;11491;13804;15381;15956;18125	221	206	9606;9606;9606
CUL4B	Cullin-4B	14.005	K4DI93;Q13620-1;Q13620;Q13620-3;A6NE76	K4DI93;Q13620-1;Q13620;Q13620-3	25;25;25;22;6	25;25;25;22;6	16;16;16;13;4	tr|K4DI93|K4DI93_HUMAN Isoform of Q13620, Cullin 4B, isoform CRA_e OS=Homo sapiens OX=9606 GN=CUL4B PE=1 SV=1;sp|Q13620-1|CUL4B-1_HUMAN Isoform of Q13620, Isoform 2 of Cullin-4B OS=Homo sapiens OX=9606 GN=CUL4B PE=1 SV=4;sp|Q13620|CUL4B_HUMAN Cullin-4B OS=	5	25	25	16	29	29	20	102.75	900	900;895;913;717;234	0	218.44	11.615	14.005	24.711	38	23	Leave out requantified	103940000	12006000	91931000	AFGSTIVINPEK;DKTMVQELLDFK;DVFEAFYK;EAFETFINK;EATDEELEK;EAVEAIQNSTSIK;EDSLDSVLFLK;ETVEEQASTTER;FLEETNR;GLNNLLDENR;HECGAAFTSK;IESLIDR;IESLIDRDYMER;INQIQMK;ISANLYK;LITYLDQTTQK;LYAAEGQK;QATGIEDGELR;QLLGEHLTAILQK;SATDGNTSTTPPTSAK;SILISSVASVHHANGLAK;SLIATVEK;SSTTVSSFANSKPGSAK;TIDGILLLIER;TLQSLACGK				627	283;1246;1481;1577;1651;1664;1721;2325;2587;3131;3442;3737;3738;4039;4121;4984;5668;6576;6710;6982;7216;7295;7539;7918;8038	True;True;True;True;True;True;True;True;True;True;True;True;True;True;True;True;True;True;True;True;True;True;True;True;True	300;1329;1584;1684;1763;1778;1839;2470;2752;3325;3648;3958;3959;4289;4373;5290;6009;7094;7236;7519;7770;7851;8116;8517;8641	402;1891;2247;2390;2505;2506;2522;2523;2524;2639;2640;3513;3514;3515;3906;4708;4709;5194;5195;5637;5638;5639;6123;6226;6227;7551;7552;8553;8554;10135;10136;10333;10334;10335;10744;11081;11231;11593;11594;11595;12183;12366	602;2851;3406;3633;3634;3824;3825;3851;3852;3853;4027;4028;4029;4030;5395;5396;5397;5398;5399;5400;5401;6003;7227;7228;7229;7977;7978;8663;8664;8665;9429;9430;9574;9575;11541;11542;11543;13021;13022;15467;15468;15743;15744;15745;16344;16345;16346;16347;16848;16849;17058;17641;17642;17643;18540;18820	602;2851;3406;3633;3825;3853;4027;5401;6003;7229;7977;8663;8665;9429;9575;11543;13022;15468;15743;16344;16848;17058;17643;18540;18820	323	502	9606;9606;9606;9606;9606
DDB2	DNA damage-binding protein 2	12.894	Q92466;Q92466-4;Q92466-2;Q92466-5;A0A087X0X5;A0A087WW71;Q92466-3;A0A087WYT8;A0A087WTQ7;A0A087WV56	Q92466;Q92466-4;Q92466-2	13;10;7;6;5;4;4;3;2;2	13;10;7;6;5;4;4;3;2;2	13;10;7;6;5;4;4;3;2;2	sp|Q92466|DDB2_HUMAN DNA damage-binding protein 2 OS=Homo sapiens OX=9606 GN=DDB2 PE=1 SV=1;sp|Q92466-4|DDB2-4_HUMAN Isoform of Q92466, Isoform D3 of DNA damage-binding protein 2 OS=Homo sapiens OX=9606 GN=DDB2 PE=1 SV=1;sp|Q92466-2|DDB2-2_HUMAN Isoform of	10	13	13	13	34.7	34.7	34.7	47.863	427	427;363;238;244;227;162;156;95;91;93	0	175.52	11.746	12.894	33.156	32	16	Leave out requantified	442350000	33973000	408370000	ASFLYSLPHR;ATSLAWHPTHPSTVAVGSK;GGDIMLWNFGIK;GIGAGGSITGLK;HFQHLTPIK;HPVNAACFSPDGAR;LLTTDQK;MVVTGDNVGNVILLNMDGK;SCTPYELR;SPLELEPEAK;TIDVFDGNSGK;TSEIVLRPR;YNLIVVGR				1431	767;870;2974;3045;3459;3547;5175;5986;6999;7411;7921;8161;9484	True;True;True;True;True;True;True;True;True;True;True;True;True	814;925;3161;3237;3665;3758;5489;6452;6453;7536;7981;8520;8772;10174	1140;1141;1290;1291;1292;1293;1294;4480;4586;4587;4588;4589;4590;4591;4592;5218;5349;7843;7844;7845;9151;9152;9153;9154;9155;9156;10763;11405;11406;11407;11408;12186;12579;14616;14617;14618	1702;1703;1704;1931;1932;1933;1934;1935;1936;6886;7042;7043;7044;7045;7046;7047;7048;7049;7050;8014;8198;11964;11965;11966;13901;13902;13903;13904;13905;13906;13907;13908;16370;17339;17340;17341;17342;17343;18545;18546;19138;22322;22323;22324;22325	1703;1934;6886;7048;8014;8198;11966;13906;16370;17340;18546;19138;22322	1040;1041;1042	137;215;230	9606;9606;9606;9606;9606;9606;9606;9606;9606;9606
CUL4A	Cullin-4A	11.654	Q13619;A0A0A0MR50;Q13619-2;A0A087WWN2	Q13619;A0A0A0MR50;Q13619-2	21;19;19;3	12;10;10;2	12;10;10;2	sp|Q13619|CUL4A_HUMAN Cullin-4A OS=Homo sapiens OX=9606 GN=CUL4A PE=1 SV=3;tr|A0A0A0MR50|A0A0A0MR50_HUMAN Isoform of Q13619, Cullin-4A OS=Homo sapiens OX=9606 GN=CUL4A PE=1 SV=1;sp|Q13619-2|CUL4A-2_HUMAN Isoform of Q13619, Isoform 2 of Cullin-4A OS=Homo sa	4	21	12	12	28.2	17.5	17.5	87.679	759	759;667;659;174	0	139.74	9.5297	11.654	99.49	18	11	Leave out requantified	39331000	6457000	32874000	AVQSSTSIR;DVFEAFYK;EATDEELER;EDSLDSVLFLK;ESFETFINK;ETVEEQVSTTER;EVPEYLNHVSK;FLEETNCLYAAEGQR;HECGAAFTSK;IESLIDR;IESLIDRDYMER;INQIQMK;LPDNYTQDTWR;LQWQTTLGHAVLK;MATGIEDSELR;QLLGEHLTAILQK;TFGTAIVINPEK;TFGTAIVINPEKDK;TIDGILLLIER;TLQSLACGK;VITYLDHSTQKPLIACVEK				1216	956;1481;1652;1721;2255;2326;2383;2586;3442;3737;3738;4039;5275;5406;5732;6710;7830;7831;7918;8038;8694	True;False;True;False;True;True;True;True;False;False;False;False;True;True;True;False;True;True;False;False;True	1019;1584;1764;1839;2398;2471;2538;2751;3648;3958;3959;4289;5603;5736;6083;6084;7236;8424;8425;8517;8641;9337	1429;1430;2247;2507;2508;2639;2640;3417;3516;3517;3518;3626;3627;3905;5194;5195;5637;5638;5639;6123;8015;8183;8655;8656;10333;10334;10335;12051;12052;12053;12183;12366;13399;13400;13401	2146;2147;2148;3406;3826;3827;3828;4027;4028;4029;4030;5251;5402;5403;5404;5576;5577;6002;7977;7978;8663;8664;8665;9429;9430;12206;12207;12208;12468;13170;13171;15743;15744;15745;18336;18337;18338;18339;18540;18820;20441;20442;20443;20444	2147;3406;3827;4027;5251;5403;5577;6002;7977;8663;8665;9429;12207;12468;13170;15743;18338;18339;18540;18820;20444	895	615	9606;9606;9606;9606
GPS1	COP9 signalosome complex subunit 1	11.505	Q13098-7;Q13098;Q13098-5;C9JFE4;A8K070;A0A096LPJ3;A0A096LP07;Q13098-6;J3KRJ4;J3QS84;J3QL53;J3KRE8;J3KSA5;J3QLT0;J3QLE8;J3KTB0;J3QS88;J3QQX0	Q13098-7;Q13098;Q13098-5;C9JFE4;A8K070;A0A096LPJ3;A0A096LP07;Q13098-6	10;10;10;10;9;9;9;6;3;3;3;3;3;3;3;3;3;1	10;10;10;10;9;9;9;6;3;3;3;3;3;3;3;3;3;1	10;10;10;10;9;9;9;6;3;3;3;3;3;3;3;3;3;1	sp|Q13098-7|CSN1-7_HUMAN Isoform of Q13098, Isoform 2 of COP9 signalosome complex subunit 1 OS=Homo sapiens OX=9606 GN=GPS1 PE=1 SV=4;sp|Q13098|CSN1_HUMAN COP9 signalosome complex subunit 1 OS=Homo sapiens OX=9606 GN=GPS1 PE=1 SV=4;sp|Q13098-5|CSN1-5_HUMAN	18	10	10	10	21.3	21.3	21.3	59.05	527	527;491;487;471;526;490;486;549;253;101;168;186;210;168;166;139;134;79	0	69.996	9.8356	11.505	11.048	16	8	Leave out requantified	90839000	7451600	83388000	AESTPEIAEQR;CAAGLAELAAR;DNLLLDMYLAPHVR;DSQTQAILTK;EGSQGELTPANSQSR;LFLELEPQVR;LQFIADHCPTLR;MALSFVQR;NVISSSSFK;TFNVDMYEEIHR				298	261;1004;1340;1431;1875;4785;5342;5724;6404;7838	True;True;True;True;True;True;True;True;True;True	277;1069;1433;1532;2003;5080;5671;6072;6912;8432	366;1511;2043;2176;2861;2862;7262;7263;8101;8102;8103;8640;9876;9877;12065;12066	549;550;2275;3089;3299;4378;4379;4380;11099;11100;11101;11102;12346;12347;12348;13145;15043;15044;18358;18359;18360	550;2275;3089;3299;4378;11099;12346;13145;15044;18358	192;193	130;392	9606;9606;9606;9606;9606;9606;9606;9606;9606;9606;9606;9606;9606;9606;9606;9606;9606;9606
COPS8	COP9 signalosome complex subunit 8	11.249	E9PGT6;Q99627-2;Q99627;H7C3S9	E9PGT6;Q99627-2;Q99627;H7C3S9	3;3;3;2	3;3;3;2	3;3;3;2	tr|E9PGT6|E9PGT6_HUMAN Isoform of Q99627, COP9 signalosome complex subunit 8 OS=Homo sapiens OX=9606 GN=COPS8 PE=1 SV=1;sp|Q99627-2|CSN8-2_HUMAN Isoform of Q99627, Isoform 2 of COP9 signalosome complex subunit 8 OS=Homo sapiens OX=9606 GN=COPS8 PE=1 SV=1;s	4	3	3	3	22.5	22.5	22.5	19.344	173	173;160;209;83	0	23.341	9.9464	11.249	0.99259	2	1	Median	6019600	621490	5398100	GILEQGWQADSTTR;LTDYVAFLEN;SANSELGGIWSVGQR				409	3055;5511;6971	True;True;True	3247;5845;7508	4605;8325;10731	7069;7070;12671;16323;16324	7069;12671;16324			9606;9606;9606;9606
		6.6943	REV__P29762;REV__B5MCB5	REV__P29762;REV__B5MCB5	2;1	2;1	2;1	sp|P29762|RABP1_HUMAN Cellular retinoic acid-binding protein 1 OS=Homo sapiens OX=9606 GN=CRABP1 PE=1 SV=2;tr|B5MCB5|B5MCB5_HUMAN Isoform of P29762, Cellular retinoic acid-binding protein 1 (Fragment) OS=Homo sapiens OX=9606 GN=CRABP1 PE=1 SV=2	2	2	2	2	0	0	0	15.565	137	137;113	0.00075358	11.177	5.129	6.6943	279.17	2	1	Median	3530300	367650	3162600	INENEWTALR;RCGDVTEEEFGEGK		+		1735	4026;6847	True;True	4274;7375	6106;10536	9404;16032	9404;16032			9606;9606
SPATS2L	SPATS2-like protein	4.7263	B8ZZZ7;Q9NUQ6-2;Q9NUQ6;Q9NUQ6-4;Q9NUQ6-3;F2Z2S1;C9JKE4;F8VZ02;F8VT91;C9JGM8;C9JW67;F8W6C2	B8ZZZ7;Q9NUQ6-2;Q9NUQ6;Q9NUQ6-4;Q9NUQ6-3;F2Z2S1;C9JKE4;F8VZ02;F8VT91;C9JGM8;C9JW67;F8W6C2	2;2;2;2;2;1;1;1;1;1;1;1	2;2;2;2;2;1;1;1;1;1;1;1	2;2;2;2;2;1;1;1;1;1;1;1	tr|B8ZZZ7|B8ZZZ7_HUMAN Isoform of Q9NUQ6, DNA polymerase-transactivated protein 6, isoform CRA_b OS=Homo sapiens OX=9606 GN=SPATS2L PE=1 SV=1;sp|Q9NUQ6-2|SPS2L-2_HUMAN Isoform of Q9NUQ6, Isoform 2 of SPATS2-like protein OS=Homo sapiens OX=9606 GN=SPATS2L P	12	2	2	2	7.2	7.2	7.2	54.945	498	498;489;558;566;588;139;154;173;188;193;238;265	0	13.575	4.0569	4.7263	171.21	2	1	Median	2821800	327560	2494200	DSSSTDSANEKPALIPR;TPCSSLLPLLNAHAATSGK				268	1434;8095	True;True	1535;8705	2180;12483	3303;18984	3303;18984			9606;9606;9606;9606;9606;9606;9606;9606;9606;9606;9606;9606
RBX1	E3 ubiquitin-protein ligase RBX1;E3 ubiquitin-protein ligase RBX1, N-terminally processed	4.2441	P62877	P62877	2	2	2	sp|P62877|RBX1_HUMAN E3 ubiquitin-protein ligase RBX1 OS=Homo sapiens OX=9606 GN=RBX1 PE=1 SV=1	1	2	2	2	17.6	17.6	17.6	12.274	108	108	0	62.998	3.9696	4.2441	36.521	4	4	Median	9199400	1002700	8196700	AAAMDVDTPSGTNSGAGK;AAAMDVDTPSGTNSGAGKK				1106	22;23	True;True	25;26;27;28	34;35;36;37;38;39	50;51;52;53;54;55;56;57;58	51;58	781	5	9606
MAPK1	Mitogen-activated protein kinase 1	3.3872	P28482;P28482-2	P28482;P28482-2	12;11	12;11	9;8	sp|P28482|MK01_HUMAN Mitogen-activated protein kinase 1 OS=Homo sapiens OX=9606 GN=MAPK1 PE=1 SV=3;sp|P28482-2|MK01-2_HUMAN Isoform of P28482, Isoform 2 of Mitogen-activated protein kinase 1 OS=Homo sapiens OX=9606 GN=MAPK1 PE=1 SV=3	2	12	12	9	33.3	33.3	24.7	41.389	360	360;316	0	83.578	2.9172	3.3872	22.957	16	2	Leave out requantified	40671000	10375000	30296000	AAAAAAGAGPEMVR;APEIMLNSK;APTIEQMK;DLKPSNLLLNTTCDLK;ELIFEETAR;FDMELDDLPK;GQVFDVGPR;HENIIGINDIIR;ISPFEHQTYCQR;LKELIFEETAR;NYLLSLPHK;YIHSANVLHR				916	3;652;678;1281;2042;2479;3251;3449;4161;4992;6436;9401	True;True;True;True;True;True;True;True;True;True;True;True	3;4;696;697;723;1365;2177;2638;3450;3655;4415;5299;6944;10085	9;10;11;968;969;1020;1941;3111;3756;4891;5203;5204;6290;7572;9924;14484;14485	12;13;14;1459;1460;1526;2930;2931;4774;5765;7518;7990;7991;7992;7993;9669;9670;11568;15118;15119;15120;22105;22106;22107;22108	12;1460;1526;2931;4774;5765;7518;7993;9669;11568;15120;22106	585;586	13;199	9606;9606
CNOT2		3.2804	F8VQD8	F8VQD8	1	1	1	tr|F8VQD8|F8VQD8_HUMAN Isoform of Q9NZN8, CCR4-NOT transcription complex subunit 2 (Fragment) OS=Homo sapiens OX=9606 GN=CNOT2 PE=1 SV=1	1	1	1	1	9.2	9.2	9.2	13.958	131	131	0.0062657	6.3444	3.0023	3.2804	209.06	7	5	Median	49204000	9869300	39335000	RGMSNNTPQLNR				475	6864	TRUE	7393	10562;10563;10564;10565;10566;10567;10568	16078;16079;16080;16081;16082;16083;16084	16079			9606
CCT7	T-complex protein 1 subunit eta	2.2922	Q99832;Q99832-3;Q99832-4;Q99832-2;F8WAM2;F8WBP8	Q99832;Q99832-3;Q99832-4;Q99832-2	14;13;12;11;2;1	14;13;12;11;2;1	14;13;12;11;2;1	sp|Q99832|TCPH_HUMAN T-complex protein 1 subunit eta OS=Homo sapiens OX=9606 GN=CCT7 PE=1 SV=2;sp|Q99832-3|TCPH-3_HUMAN Isoform of Q99832, Isoform 3 of T-complex protein 1 subunit eta OS=Homo sapiens OX=9606 GN=CCT7 PE=1 SV=2;sp|Q99832-4|TCPH-4_HUMAN Isofo	6	14	14	14	30	30	30	59.366	543	543;499;456;339;98;83	0	125.99	1.7184	2.2922	8.0992	24	2	Leave out requantified	44659000	15359000	29300000	ALEIIPR;ATISNDGATILK;CQVFEETQIGGER;GGAEQFMEETER;LPIGDVATQYFADR;MMPTPVILLK;NDSVVAGGGAIEMELSK;PYVEEGLHPQIIIR;QLCDNAGFDATNILNK;QQLLIGAYAK;SLHDAIMIVR;TCTFILR;TFSYAGFEMQPK;YNFFTGCPK				1507	491;854;1026;2969;5286;5895;6051;6551;6694;6765;7290;7750;7844;9476	True;True;True;True;True;True;True;True;True;True;True;True;True;True	518;909;1092;3155;3156;5614;6327;6328;6523;7066;7220;7292;7845;7846;8336;8438;10165	733;734;1266;1546;4470;4471;4472;4473;4474;8028;8986;8987;8988;9250;10097;10310;10406;10407;11217;11218;11219;11220;11922;12076;14592;14593	1105;1106;1894;1895;2326;6870;6871;6872;6873;6874;6875;6876;6877;6878;6879;12228;13663;13664;13665;13666;14057;14058;15407;15712;15713;15850;15851;17041;17042;17043;17044;18129;18376;22285;22286;22287;22288	1105;1895;2326;6877;12228;13664;14057;15407;15713;15850;17042;18129;18376;22287	1083;1084;1085;1086;1087;1088	1;2;227;382;394;414	9606;9606;9606;9606;9606;9606
CCT5	T-complex protein 1 subunit epsilon	2.2708	E7ENZ3;P48643;B7ZAR1;E9PCA1;P48643-2;D6RIZ7;H0Y914	E7ENZ3;P48643;B7ZAR1;E9PCA1;P48643-2	15;15;14;14;14;1;1	15;15;14;14;14;1;1	15;15;14;14;14;1;1	tr|E7ENZ3|E7ENZ3_HUMAN Isoform of P48643, T-complex protein 1 subunit epsilon OS=Homo sapiens OX=9606 GN=CCT5 PE=1 SV=1;sp|P48643|TCPE_HUMAN T-complex protein 1 subunit epsilon OS=Homo sapiens OX=9606 GN=CCT5 PE=1 SV=1;tr|B7ZAR1|B7ZAR1_HUMAN Isoform of P48	7	15	15	15	29	29	29	53.848	486	486;541;503;520;448;44;62	0	101.69	1.7416	2.2708	12.031	25	5	Leave out requantified	40346000	13980000	26366000	AVTIFIR;DTEPLIQTAK;DVDFELIKVEGK;EMNPALGIDCLHK;FEEMIQQIK;FSELTAEK;HKLDVTSVEDYK;IADGYEQAAR;IAILTCPFEPPKPK;ISDSVLVDIK;LDVTSVEDYK;LMGLEALK;MIIEEAK;QQHVIETLIGK;SLHDALCVIR				371	966;1451;1476;2132;2501;2708;3498;3600;3619;4133;4665;5210;5838;6763;7291	True;True;True;True;True;True;True;True;True;True;True;True;True;True;True	1029;1554;1579;2271;2272;2661;2886;3708;3813;3833;4385;4949;5530;6242;7290;7847	1442;1443;2201;2202;2238;3236;3237;3238;3784;3785;4086;4087;5284;5431;5432;5461;6243;6244;7064;7065;7897;8865;10403;10404;11221;11222;11223	2163;2164;3341;3342;3343;3396;4975;4976;4977;5816;5817;6280;6281;6282;8110;8335;8336;8337;8338;8386;9598;9599;9600;9601;9602;10810;10811;12037;13495;13496;15847;15848;17045;17046;17047;17048;17049;17050	2163;3341;3396;4976;5817;6281;8110;8338;8386;9599;10810;12037;13496;15847;17048	222;223	29;430	9606;9606;9606;9606;9606;9606;9606
UBE3A	Ubiquitin-protein ligase E3A	2.2316	A0A0D9SG77;A0A1B0GVL3;Q05086-2;Q05086-3;Q05086	A0A0D9SG77;A0A1B0GVL3;Q05086-2;Q05086-3;Q05086	2;2;2;2;2	2;2;2;2;2	2;2;2;2;2	tr|A0A0D9SG77|A0A0D9SG77_HUMAN Isoform of Q05086, Ubiquitin-protein ligase E3A OS=Homo sapiens OX=9606 GN=UBE3A PE=1 SV=1;tr|A0A1B0GVL3|A0A1B0GVL3_HUMAN Isoform of Q05086, Ubiquitin-protein ligase E3A OS=Homo sapiens OX=9606 GN=UBE3A PE=1 SV=1;sp|Q05086-2|	5	2	2	2	3.5	3.5	3.5	88.082	765	765;813;852;872;875	0	11.462	1.7512	2.2316	150.76	2	1	Median	2444700	641200	1803500	IGDSSQGDNNLQK;NLVNDDDAIVAASK				115	3786;6241	True;True	4009;6722	5712;9561	8784;14536	8784;14536			9606;9606;9606;9606;9606
CCT2	T-complex protein 1 subunit beta	2.1326	P78371-2;P78371;F5GWF6;F8VQ14	P78371-2;P78371;F5GWF6;F8VQ14	18;18;17;16	18;18;17;16	18;18;17;16	sp|P78371-2|TCPB-2_HUMAN Isoform of P78371, Isoform 2 of T-complex protein 1 subunit beta OS=Homo sapiens OX=9606 GN=CCT2 PE=1 SV=4;sp|P78371|TCPB_HUMAN T-complex protein 1 subunit beta OS=Homo sapiens OX=9606 GN=CCT2 PE=1 SV=4;tr|F5GWF6|F5GWF6_HUMAN Isofo	4	18	18	18	36.9	36.9	36.9	52.717	488	488;535;530;416	0	231.11	1.7594	2.1326	9.9627	29	1	Leave out requantified	99579000	34957000	64622000	AAHSEGNTTAGLDMR;DASLMVTNDGATILK;EAESLIAK;EALLSSAVDHGSDEVK;EAVAMESYAK;GATQQILDEAER;GSGNLEAIHIIK;HGINCFINR;IHPQTIIAGWR;ILIANTGMDTDK;ILIANTGMDTDKIK;ILLSSGR;LAVEAVLR;LIEEVMIGEDK;QDLMNIAGTTLSSK;VAEIEHAEK;VAEIEHAEKEK;VLVDMSR				1130	61;1071;1576;1607;1661;2840;3275;3470;3839;3946;3947;3956;4595;4943;6592;8360;8361;8850	True;True;True;True;True;True;True;True;True;True;True;True;True;True;True;True;True;True	66;67;1142;1143;1683;1716;1774;1775;3022;3474;3676;4064;4175;4176;4177;4178;4187;4877;5246;5247;7111;7112;8984;8985;9501	84;85;86;1636;1637;2389;2429;2430;2518;2519;4276;4927;5239;5240;5791;5964;5965;5966;5967;5968;5969;5984;6975;7495;7496;10156;10157;12883;12884;12885;13649	130;131;132;133;134;2479;2480;2481;2482;3631;3632;3691;3692;3693;3694;3695;3844;3845;3846;3847;3848;6573;6574;6575;6576;7560;7561;8044;8045;8046;8906;9157;9158;9159;9160;9161;9162;9163;9164;9165;9166;9167;9168;9169;9170;9171;9172;9195;10688;11464;11465;11466;11467;11468;15493;15494;15495;15496;19602;19603;19604;19605;19606;19607;20818;20819	130;2479;3631;3695;3847;6576;7560;8045;8906;9160;9168;9195;10688;11468;15495;19603;19606;20818	800;801;802;803;804;805	15;113;197;306;389;433	9606;9606;9606;9606
CCT8	T-complex protein 1 subunit theta	2.1289	P50990;P50990-2;P50990-3;H7C4C8;H7C2U0	P50990;P50990-2;P50990-3	27;26;21;13;4	27;26;21;13;4	27;26;21;13;4	sp|P50990|TCPQ_HUMAN T-complex protein 1 subunit theta OS=Homo sapiens OX=9606 GN=CCT8 PE=1 SV=4;sp|P50990-2|TCPQ-2_HUMAN Isoform of P50990, Isoform 2 of T-complex protein 1 subunit theta OS=Homo sapiens OX=9606 GN=CCT8 PE=1 SV=4;sp|P50990-3|TCPQ-3_HUMAN I	5	27	27	27	51.6	51.6	51.6	59.62	548	548;529;475;323;107	0	190.34	1.7285	2.1289	20.146	41	5	Leave out requantified	141400000	51067000	90328000	AIADTGANVVVTGGK;ALAENSGVK;APGFAQMLK;AVDDGVNTFK;DIDEVSSLLR;EDGAISTIVLR;ELEVQHPAAK;ETEGDVTSVK;FAEAFEAIPR;GEENLMDAQVK;GSTDNLMDDIER;HFSGLEEAVYR;IAVYSCPFDGMITETK;ILGSGISSSSVLHGMVFK;KFAEAFEAIPR;LATNAAVTVLR;LFVTNDAATILR;LVPGGGATEIELAK;LYAVHQEGNK;MVINHLEK;QYGNEVFLAK;TAEELMNFSK;TAYGPNGMNK;TVGATALPR;VADMALHYANK;VDQIIMAK;YNIMLVR				1025	378;456;658;902;1198;1693;2022;2293;2442;2900;3292;3460;3649;3942;4338;4589;4815;5627;5670;5970;6837;7693;7741;8263;8354;8461;9482	True;True;True;True;True;True;True;True;True;True;True;True;True;True;True;True;True;True;True;True;True;True;True;True;True;True;True	397;479;703;958;1278;1809;2157;2437;2598;3083;3084;3491;3492;3666;3865;3866;4171;4605;4870;5112;5966;6011;6428;7365;8277;8278;8327;8880;8977;8978;9090;9091;10172	542;543;544;674;979;1343;1823;2583;2584;3087;3471;3707;4362;4363;4953;4954;4955;5219;5220;5505;5506;5959;6574;6962;7302;7303;8497;8556;8557;9115;10522;11839;11840;11911;12729;12870;12871;12872;13043;13044;14614	818;819;820;821;822;1014;1473;2012;2013;2750;3941;3942;3943;4741;5330;5331;5332;5687;5688;5689;5690;6701;6702;6703;6704;6705;6706;7594;7595;7596;7597;7598;8015;8016;8017;8018;8454;8455;8456;8457;8458;9151;10104;10105;10106;10666;11163;11164;11165;12920;12921;13024;13025;13026;13838;16015;16016;18001;18002;18003;18004;18114;19364;19365;19583;19584;19585;19869;19870;19871;22319	821;1014;1473;2013;2750;3941;4741;5332;5687;6702;7595;8016;8454;9151;10104;10666;11165;12920;13025;13838;16016;18002;18114;19365;19585;19871;22319	680;681;682;683;684;685;686;687;688;689	14;52;55;221;249;266;276;300;385;526	9606;9606;9606;9606;9606
TCP1	T-complex protein 1 subunit alpha	2.126	P17987;E7EQR6;F5H282;E7ERF2;F5GZ03;F5GZI8;F5H676;F5H136;F5GYL4;F5H726	P17987;E7EQR6;F5H282;E7ERF2	17;12;11;10;5;4;3;3;2;2	17;12;11;10;5;4;3;3;2;2	17;12;11;10;5;4;3;3;2;2	sp|P17987|TCPA_HUMAN T-complex protein 1 subunit alpha OS=Homo sapiens OX=9606 GN=TCP1 PE=1 SV=1;tr|E7EQR6|E7EQR6_HUMAN Isoform of P17987, T-complex protein 1 subunit alpha OS=Homo sapiens OX=9606 GN=TCP1 PE=1 SV=1;tr|F5H282|F5H282_HUMAN Isoform of P17987,	10	17	17	17	32.7	32.7	32.7	60.343	556	556;401;332;433;221;100;111;136;65;91	0	111.75	1.6809	2.126	15.668	20	3	Leave out requantified	43495000	15991000	27504000	AFHNEAQVNPER;DDKHGSYEDAVHSGALND;EQLAIAEFAR;FATEAAITILR;GANDFMCDEMER;HGSYEDAVHSGALND;ICDDELILIK;IHPTSVISGYR;LLEVEHPAAK;MEGPLSVFGDR;QAGVFEPTIVK;SLHDALCVVK;SQNVMAAASIANIVK;TSASIILR;VLCELADLQDK;WIGLDLSNGKPR;YPVNSVNILK				869	285;1093;2204;2458;2828;3477;3651;3840;5074;5779;6562;7292;7460;8157;8721;9250;9502	True;True;True;True;True;True;True;True;True;True;True;True;True;True;True;True;True	302;1165;2345;2614;3010;3683;3868;4065;5383;6153;7078;7848;8035;8036;8768;9366;9927;10198	407;1668;3331;3332;3724;4263;5248;5508;5792;7709;8741;8742;10111;11224;11479;11480;12573;12574;13441;14242;14647;14648	609;610;2526;5122;5123;5713;5714;6551;8059;8060;8460;8907;8908;11757;11758;13312;13313;13314;13315;15430;15431;17051;17460;17461;17462;17463;19129;19130;19131;20503;20504;21728;22365;22366;22367	609;2526;5123;5713;6551;8060;8460;8908;11758;13313;15431;17051;17462;19131;20503;21728;22366	552;553	1;23	9606;9606;9606;9606;9606;9606;9606;9606;9606;9606
CCT4	T-complex protein 1 subunit delta	2.0261	P50991;P50991-2	P50991;P50991-2	16;14	16;14	16;14	sp|P50991|TCPD_HUMAN T-complex protein 1 subunit delta OS=Homo sapiens OX=9606 GN=CCT4 PE=1 SV=4;sp|P50991-2|TCPD-2_HUMAN Isoform of P50991, Isoform 2 of T-complex protein 1 subunit delta OS=Homo sapiens OX=9606 GN=CCT4 PE=1 SV=4	2	16	16	16	34.1	34.1	34.1	57.924	539	539;509	0	114.19	1.5833	2.0261	8.3664	18	2	Leave out requantified	45545000	18089000	27457000	ALIAGGGAPEIELALR;ETLLNSATTSLNSK;GDVTITNDGATILK;GIEILTDMSRPVELSDR;GIHPTIISESFQK;IDDVVNTR;IGLIQFCLSAPK;MLVELSK;PENVAPR;QMQVLHPAAR;TDMDNQIVVSDYAQMDR;TGCNVLLIQK;TLSGMESYCVR;TVTIVVR;VIDPATATSVDLR;VSNSGITR				1026	518;2310;2887;3038;3047;3659;3805;5881;6476;6732;7773;7855;8043;8301;8634;9033	True;True;True;True;True;True;True;True;True;True;True;True;True;True;True;True	549;2454;3070;3230;3239;3876;4029;6307;6985;7258;8361;8449;8647;8922;9274;9699	779;3493;3494;4345;4578;4594;4595;5517;5742;8957;9988;10361;11963;12087;12379;12796;13317;13910	1173;1174;5369;5370;5371;6677;6678;7029;7030;7031;7052;7053;8472;8473;8829;13626;15231;15789;18184;18391;18392;18837;18838;19471;20314;20315;20316;21230	1173;5370;6677;7030;7052;8472;8829;13626;15231;15789;18184;18391;18838;19471;20316;21230	690;691;692	90;151;272	9606;9606
CCT6A	T-complex protein 1 subunit zeta	1.9925	P40227;P40227-2;J3KRI6	P40227;P40227-2	15;14;1	15;14;1	11;11;0	sp|P40227|TCPZ_HUMAN T-complex protein 1 subunit zeta OS=Homo sapiens OX=9606 GN=CCT6A PE=1 SV=3;sp|P40227-2|TCPZ-2_HUMAN Isoform of P40227, Isoform 2 of T-complex protein 1 subunit zeta OS=Homo sapiens OX=9606 GN=CCT6A PE=1 SV=3	3	15	15	11	26.9	26.9	20.7	58.024	531	531;486;128	0	93.771	1.6985	1.9925	13.639	14	3	Leave out requantified	56085000	22318000	33767000	ALQFLEEVK;AQAALAVNISAAR;EGIVALR;EMDRETLIDVAR;ETLIDVAR;GFVVINQK;GIDPFSLDALSK;IITEGFEAAK;MLVSGAGDIK;QADLYISEGLHPR;SETDTSLIR;SVTLLIK;TEVNSGFFYK;VCGDSDKGFVVINQK;VLAQNSGFDLQETLVK				973	551;686;1843;2120;2309;2964;3034;3885;5884;6556;7101;7646;7822;8428;8714	True;True;True;True;True;True;True;True;True;True;True;True;True;True;True	586;731;1969;2258;2453;3150;3226;4111;6311;7071;7645;8225;8415;9055;9358	818;1033;2815;3219;3492;4463;4574;5866;5867;8964;8965;8966;10102;10906;11742;12040;12983;13430	1228;1229;1548;1549;4302;4949;5368;6861;6862;7024;7025;9021;9022;13636;13637;13638;15415;16592;17862;18314;18315;19777;20487	1229;1548;4302;4949;5368;6861;7024;9022;13637;15415;16592;17862;18315;19777;20487	644	46	9606;9606;9606
CCT3	T-complex protein 1 subunit gamma	1.9348	P49368-2;P49368;B4DUR8;E9PRC8;Q5SZX6;E9PQ35;E9PM09;Q5SZX9;Q5SZW8	P49368-2;P49368;B4DUR8	14;14;13;3;3;2;1;1;1	14;14;13;3;3;2;1;1;1	14;14;13;3;3;2;1;1;1	sp|P49368-2|TCPG-2_HUMAN Isoform of P49368, Isoform 2 of T-complex protein 1 subunit gamma OS=Homo sapiens OX=9606 GN=CCT3 PE=1 SV=4;sp|P49368|TCPG_HUMAN T-complex protein 1 subunit gamma OS=Homo sapiens OX=9606 GN=CCT3 PE=1 SV=4;tr|B4DUR8|B4DUR8_HUMAN Iso	9	14	14	14	31.4	31.4	31.4	56.43	507	507;545;500;234;276;144;154;161;188	0	101.5	1.561	1.9348	6.2787	27	4	Leave out requantified	49563000	19153000	30410000	AMTGVEQWPYR;ANITAIR;AVAQALEVIPR;EDDVGTGAGLLEIK;ELGIWEPLAVK;GISDLAQHYLMR;IPGGIIEDSCVLR;IVLLDSSLEYK;KGESQTDIEITR;MMGHRPVLVLSQNTK;MVQFEENGR;NLQDAMQVCR;TAVETAVLLLR;TLIQNCGASTIR				1009	620;634;891;1691;2030;3063;4057;4242;4347;5888;5979;6213;7735;8009	True;True;True;True;True;True;True;True;True;True;True;True;True;True	660;661;677;947;1807;2165;3255;4309;4502;4615;6318;6444;6692;8321;8609	919;920;921;922;943;944;1325;1326;2579;2580;2581;3098;4616;6148;6149;6416;6417;6586;6587;6588;8975;9141;9521;11898;11899;11900;12318;12319	1379;1380;1381;1382;1383;1384;1385;1420;1421;1981;1982;1983;1984;3933;3934;3935;3936;3937;3938;3939;4756;4757;7091;9465;9466;9869;9870;9871;9872;10121;10122;10123;13651;13880;13881;14473;14474;18095;18096;18097;18098;18099;18750;18751;18752;18753	1383;1421;1984;3939;4757;7091;9465;9872;10122;13651;13880;14473;18097;18750	670;671	267;391	9606;9606;9606;9606;9606;9606;9606;9606;9606
SMARCA1	Probable global transcription activator SNF2L1	1.8922	B7ZLQ5;P28370;A0A0A0MRP6;P28370-2	B7ZLQ5;P28370;A0A0A0MRP6;P28370-2	14;14;13;13	5;5;4;4	5;5;4;4	tr|B7ZLQ5|B7ZLQ5_HUMAN Isoform of P28370, Probable global transcription activator SNF2L1 OS=Homo sapiens OX=9606 GN=SMARCA1 PE=1 SV=1;sp|P28370|SMCA1_HUMAN Probable global transcription activator SNF2L1 OS=Homo sapiens OX=9606 GN=SMARCA1 PE=1 SV=2;tr|A0A0A	4	14	5	5	12.1	4.9	4.9	124.33	1070	1070;1054;1058;1042	0	30.934	1.3675	1.8922	30.552	5	0	Leave out requantified	2554300	1157500	1396800	DFNQFIK;DIDVLNSSGK;EAIEAFNAPNSSK;FEVSPSYVK;IMAQIER;KANYAVDAYFR;LDGQTPHEER;LDSIVIQQGR;LFELLEK;LITDNTVEER;LLNILMQLR;NYTEEEDR;VLIFSQMTR;YLVIDEAHR				263	1144;1200;1595;2521;3997;4300;4627;4652;4770;4979;5120;6447;8782;9461	False;True;True;True;False;False;True;False;False;True;False;False;False;False	1218;1280;1704;2681;4230;4562;4910;4936;5062;5284;5429;6955;9428;10149	1742;1825;2415;3818;6042;6514;7018;7046;7243;7544;7771;7772;9946;13549;14573	2633;2753;2754;3669;3670;5867;5868;9291;9292;10026;10750;10788;10789;11075;11530;11531;11849;11850;15154;20651;22251;22252;22253;22254	2633;2753;3669;5867;9291;10026;10750;10788;11075;11530;11849;15154;20651;22254	179	454	9606;9606;9606;9606
CDO1	Cysteine dioxygenase type 1	1.8668	Q16878	Q16878	2	2	2	sp|Q16878|CDO1_HUMAN Cysteine dioxygenase type 1 OS=Homo sapiens OX=9606 GN=CDO1 PE=1 SV=2	1	2	2	2	7.5	7.5	7.5	22.972	200	200	0	11.542	1.472	1.8668	24.356	3	0	Plateau	4424700	1863800	2560800	MEQTEVLK;TLADLIR				1278	5786;7975	True;True	6160;8575	8750;12276;12277	13325;18698;18699	13325;18698			9606
HIST2H3PS2	Histone H3	1.8433	Q5TEC6	Q5TEC6	2	1	1	tr|Q5TEC6|Q5TEC6_HUMAN Histone H3 OS=Homo sapiens OX=9606 GN=HIST2H3PS2 PE=1 SV=1	1	2	1	1	13.2	8.1	8.1	15.43	136	136	0.003296	6.6536	1.7108	1.8433	0.76859	2	0	Median	32899000	12365000	20534000	EIAQEFKTDLR;STELLIR				1317	1908;7553	True;False	2036;8131	2910;2911;11617	4451;4452;4453;17679;17680	4452;17679			9606
H2AFY2	Core histone macro-H2A.2	1.8294	Q9P0M6;D6RCF2;Q5SQT3	Q9P0M6	3;1;1	2;0;0	2;0;0	sp|Q9P0M6|H2AW_HUMAN Core histone macro-H2A.2 OS=Homo sapiens OX=9606 GN=H2AFY2 PE=1 SV=3	3	3	2	2	9.7	7.3	7.3	40.058	372	372;165;242	0	14.46	1.4027	1.8294	10.674	2	0	Median	1313800	555580	758270	AGVIFPVGR;AISAHFDDSSASSLK;GVTIASGGVLPR				1626	358;425;3379	False;True;True	376;446;3584	509;619;5092	767;768;936;7818;7819	768;936;7818			9606;9606;9606
GNB4;GNB2;GNB1;GNB3	Guanine nucleotide-binding protein subunit beta-4;Guanine nucleotide-binding protein G(I)/G(S)/G(T) subunit beta-1;Guanine nucleotide-binding protein G(I)/G(S)/G(T) subunit beta-2;Guanine nucleotide-binding protein G(I)/G(S)/G(T) subunit beta-3	1.8169	Q9HAV0;C9JZN1;E7EP32;B1AKQ8;C9JXA5;C9JIS1;F6X3N5;F6UT28;P62873-2;P62873;P62879;P16520-2;F5H8J8;F5H100;F5H0S8;P16520;E9PCP0;C9JD14	Q9HAV0;C9JZN1;E7EP32;B1AKQ8;C9JXA5;C9JIS1;F6X3N5;F6UT28;P62873-2;P62873;P62879;P16520-2;F5H8J8;F5H100;F5H0S8;P16520;E9PCP0;C9JD14	2;2;2;2;2;2;2;2;2;2;2;1;1;1;1;1;1;1	2;2;2;2;2;2;2;2;2;2;2;1;1;1;1;1;1;1	2;2;2;2;2;2;2;2;2;2;2;1;1;1;1;1;1;1	sp|Q9HAV0|GBB4_HUMAN Guanine nucleotide-binding protein subunit beta-4 OS=Homo sapiens OX=9606 GN=GNB4 PE=1 SV=3;tr|C9JZN1|C9JZN1_HUMAN Isoform of P62879, Guanine nucleotide-binding protein G(I)/G(S)/G(T) subunit beta-2 (Fragment) OS=Homo sapiens OX=9606 G	18	2	2	2	6.2	6.2	6.2	37.567	340	340;152;296;107;251;232;163;165;332;340;340;297;232;232;264;340;339;79	0	12.504	1.5554	1.8169	10.509	2	0	Median	2410800	1011200	1399600	LIIWDSYTTNK;LLVSASQDGK				233	4955;5184	True;True	5259;5498	7511;7857	11486;11487;11981	11486;11981			9606;9606;9606;9606;9606;9606;9606;9606;9606;9606;9606;9606;9606;9606;9606;9606;9606;9606
PARP1	Poly [ADP-ribose] polymerase 1	1.7896	P09874;Q5VX84;Q5VX85	P09874	25;2;2	25;2;2	25;2;2	sp|P09874|PARP1_HUMAN Poly [ADP-ribose] polymerase 1 OS=Homo sapiens OX=9606 GN=PARP1 PE=1 SV=4	3	25	25	25	29.2	29.2	29.2	113.08	1014	1014;108;155	0	178.65	1.4563	1.7896	18.807	30	7	Leave out requantified	53408000	21867000	31541000	AEPVEVVAPR;ASLCISTK;DSEEAEIIR;FYTLIPHDFGMK;GFSLLATEDKEALKK;GGAAVDPDSGLEHSAHVLEK;GGSDDSSKDPIDVNYEK;GIYFADMVSK;HPDVEVDGFSELR;IAPPEAPVTGYMFGK;KGDEVDGVDEVAK;KLTVNPGTK;KPPLLNNADSVQAK;LQLLEDDKENR;LTVNPGTK;MAIMVQSPMFDGK;MIFDVESMK;MVDPEKPQLGMIDR;QQVPSGESAILDR;SDAYYCTGDVTAWTK;TLGDFAAEYAK;TTNFAGILSQGLR;VCSTNDLK;VGTVIGSNK;VVSEDFLQDVSASTK				823	251;781;1418;2792;2954;2966;3007;3080;3542;3630;4344;4400;4415;5358;5566;5720;5837;5966;6775;7004;7999;8225;8430;8617;9172	True;True;True;True;True;True;True;True;True;True;True;True;True;True;True;True;True;True;True;True;True;True;True;True;True	265;829;1519;2972;3140;3152;3197;3273;3753;3844;3845;4612;4671;4687;5687;5903;6065;6241;6423;7302;7542;8599;8840;9057;9255;9846	352;1160;2161;4209;4448;4465;4466;4530;4642;5343;5477;5478;6583;6669;6691;6692;8123;8124;8407;8632;8864;9110;10418;10770;12305;12306;12307;12673;12674;12985;13290;14109;14110	526;527;1737;3275;6457;6841;6864;6865;6967;7134;8188;8412;8413;10117;10229;10261;10262;10263;12381;12382;12383;12795;13135;13493;13494;13831;15867;15868;16381;18734;18735;18736;18737;19275;19276;19277;19278;19780;20272;20273;20274;21531;21532;21533;21534	527;1737;3275;6457;6841;6864;6967;7134;8188;8413;10117;10229;10263;12383;12795;13135;13494;13831;15868;16381;18737;19278;19780;20274;21534	495;496;497	153;890;900	9606;9606;9606
POGZ	Pogo transposable element with ZNF domain	1.776	Q7Z3K3-5;Q7Z3K3-7;Q7Z3K3-2;Q7Z3K3-3;Q7Z3K3-6;Q7Z3K3	Q7Z3K3-5;Q7Z3K3-7;Q7Z3K3-2;Q7Z3K3-3;Q7Z3K3-6;Q7Z3K3	2;2;2;2;2;2	2;2;2;2;2;2	2;2;2;2;2;2	sp|Q7Z3K3-5|POGZ-5_HUMAN Isoform of Q7Z3K3, Isoform 5 of Pogo transposable element with ZNF domain OS=Homo sapiens OX=9606 GN=POGZ PE=1 SV=2;sp|Q7Z3K3-7|POGZ-7_HUMAN Isoform of Q7Z3K3, Isoform 7 of Pogo transposable element with ZNF domain OS=Homo sapiens	6	2	2	2	2.3	2.3	2.3	145.29	1315	1315;1348;1357;1366;1401;1410	0	12.728	1.3056	1.776	40.758	4	2	Median	1955000	916270	1038800	VPEPNENVGDAVQTK;VTSSIPVFDLQDGGR				1354	8927;9099	True;True	9587;9768	13760;13761;14004;14005	21008;21009;21375;21376;21377	21009;21376			9606;9606;9606;9606;9606;9606
RCOR1;RCOR3	REST corepressor 1;REST corepressor 3	1.7699	Q9UKL0;E9PR63;E9PQE5;B4DV59;Q9P2K3-2;Q9P2K3-4;Q9P2K3;Q9P2K3-3	Q9UKL0;E9PR63;E9PQE5;B4DV59;Q9P2K3-2;Q9P2K3-4;Q9P2K3;Q9P2K3-3	2;1;1;1;1;1;1;1	2;1;1;1;1;1;1;1	2;1;1;1;1;1;1;1	sp|Q9UKL0|RCOR1_HUMAN REST corepressor 1 OS=Homo sapiens OX=9606 GN=RCOR1 PE=1 SV=2;tr|E9PR63|E9PR63_HUMAN Isoform of Q9P2K3, REST corepressor 3 (Fragment) OS=Homo sapiens OX=9606 GN=RCOR3 PE=1 SV=1;tr|E9PQE5|E9PQE5_HUMAN Isoform of Q9P2K3, REST corepresso	8	2	2	2	4.3	4.3	4.3	53.327	485	485;86;149;374;436;449;495;553	0	12.216	1.352	1.7699	10.282	2	1	Median	1296600	554950	741610	DFQAISDVIGNK;LDEYIAIAK				1653	1146;4617	True;True	1220;4900	1744;7007	2635;2636;10738	2635;10738			9606;9606;9606;9606;9606;9606;9606;9606
COPB2	Coatomer subunit beta	1.7416	P35606-2;P35606;D6R997;D6RBZ7;D6RCL6;D6RBG7;D6RBT6	P35606-2;P35606	7;7;3;2;2;2;2	7;7;3;2;2;2;2	7;7;3;2;2;2;2	sp|P35606-2|COPB2-2_HUMAN Isoform of P35606, Isoform 2 of Coatomer subunit beta OS=Homo sapiens OX=9606 GN=COPB2 PE=1 SV=2;sp|P35606|COPB2_HUMAN Coatomer subunit beta OS=Homo sapiens OX=9606 GN=COPB2 PE=1 SV=2	7	7	7	7	8.1	8.1	8.1	99.045	877	877;906;152;77;86;89;111	0	45.514	1.2672	1.7416	58.565	12	1	Leave out requantified	13036000	7396700	5639100	DNNQFASASLDR;HSEVQQANLK;LESTLNYGMER;LPEAAFLAR;TFEVCDLPVR;TMYLLGYIPK;VFNYNTLER				956	1344;3560;4747;5277;7829;8064;8551	True;True;True;True;True;True;True	1437;3773;5036;5605;8423;8673;9188	2048;2049;2050;2051;5373;5374;5375;7199;7200;8017;12050;12423;13184	3095;3096;3097;3098;3099;3100;3101;8241;8242;8243;8244;8245;11007;11008;11009;11010;12210;18335;18904;18905;20099	3097;8242;11008;12210;18335;18905;20099			9606;9606;9606;9606;9606;9606;9606
H2AFY	Core histone macro-H2A.1;Histone H2A	1.7241	O75367-2;O75367-3;O75367;B4DJC3	O75367-2;O75367-3;O75367;B4DJC3	4;4;4;3	4;4;4;3	3;3;3;2	sp|O75367-2|H2AY-2_HUMAN Isoform of O75367, Isoform 1 of Core histone macro-H2A.1 OS=Homo sapiens OX=9606 GN=H2AFY PE=1 SV=4;sp|O75367-3|H2AY-3_HUMAN Isoform of O75367, Isoform 3 of Core histone macro-H2A.1 OS=Homo sapiens OX=9606 GN=H2AFY PE=1 SV=4;sp|O75	4	4	4	3	16.8	16.8	14.4	39.183	369	369;371;372;200	0	30.775	1.4181	1.7241	8.499	4	0	Leave out requantified	9065900	3976600	5089300	AASADSTTEGTPADGFTVLSTK;AGVIFPVGR;NGPLEVAGAAVSAGHGLPAK;SIAFPSIGSGR				731	111;358;6112;7201	True;True;True;True	119;376;6585;7752	145;509;9356;11057;11058	225;767;768;14219;14220;16813;16814	225;768;14220;16814			9606;9606;9606;9606
AIP	AH receptor-interacting protein	1.6522	O00170;E9PMH2	O00170;E9PMH2	2;1	2;1	2;1	sp|O00170|AIP_HUMAN AH receptor-interacting protein OS=Homo sapiens OX=9606 GN=AIP PE=1 SV=2;tr|E9PMH2|E9PMH2_HUMAN Isoform of O00170, Peptidylprolyl isomerase (Fragment) OS=Homo sapiens OX=9606 GN=AIP PE=1 SV=2	2	2	2	2	8.8	8.8	8.8	37.636	330	330;232	0	11.973	1.2135	1.6522	7.2646	2	0	Median	1128300	510550	617780	TLHSDDEGTVLDDSR;VLELDPALAPVVSR				659	8004;8746	True;True	8604;9392	12313;13487;13488	18744;20564;20565	18744;20564			9606;9606
RAB3GAP2	Rab3 GTPase-activating protein non-catalytic subunit	1.6489	Q9H2M9	Q9H2M9	4	4	4	sp|Q9H2M9|RBGPR_HUMAN Rab3 GTPase-activating protein non-catalytic subunit OS=Homo sapiens OX=9606 GN=RAB3GAP2 PE=1 SV=1	1	4	4	4	3.5	3.5	3.5	155.98	1393	1393	0	25.072	1.1459	1.6489	32.092	3	1	Plateau	1364300	754480	609860	TASNIGGFNAAIK;VAQFLVIYAPR;VSSLQAEPLPR;VVSAAVQAQHSATK				1563	7726;8398;9040;9171	True;True;True;True	8312;9023;9706;9845	11884;12942;13919;14108	18070;19700;19701;19702;19703;21244;21245;21530	18070;19703;21244;21530			9606
H1F0	Histone H1.0;Histone H1.0, N-terminally processed	1.6391	P07305;P07305-2	P07305;P07305-2	5;4	5;4	5;4	sp|P07305|H10_HUMAN Histone H1.0 OS=Homo sapiens OX=9606 GN=H1F0 PE=1 SV=3;sp|P07305-2|H10-2_HUMAN Isoform of P07305, Isoform 2 of Histone H1.0 OS=Homo sapiens OX=9606 GN=H1F0 PE=1 SV=3	2	5	5	5	27.3	27.3	27.3	20.863	194	194;177	0	31.049	1.414	1.6391	13.527	5	1	Leave out requantified	6401800	2604200	3797600	GVGASGSFR;LVTTGVLK;TENSTSAPAAKPK;VGENADSQIK;YSDMIVAAIQAEK				808	3350;5653;7812;8579;9517	True;True;True;True;True	3555;5994;8404;9216;10213	5053;8532;12022;13227;14667	7755;7756;12980;12981;18281;18282;20175;20176;22396	7755;12981;18282;20176;22396			9606;9606
TOP3B;TOP3A	DNA topoisomerase;DNA topoisomerase 3-beta-1;DNA topoisomerase 3-alpha	1.6328	H0Y6W0;O95985-3;O95985-2;O95985;H7C4B0;Q13472-3;Q13472-2;Q13472	H0Y6W0;O95985-3;O95985-2;O95985;H7C4B0;Q13472-3;Q13472-2;Q13472	2;2;2;2;1;1;1;1	2;2;2;2;1;1;1;1	2;2;2;2;1;1;1;1	tr|H0Y6W0|H0Y6W0_HUMAN Isoform of O95985, DNA topoisomerase (Fragment) OS=Homo sapiens OX=9606 GN=TOP3B PE=1 SV=1;sp|O95985-3|TOP3B-3_HUMAN Isoform of O95985, Isoform 3 of DNA topoisomerase 3-beta-1 OS=Homo sapiens OX=9606 GN=TOP3B PE=2 SV=1;sp|O95985-2|TO	8	2	2	2	3.6	3.6	3.6	59.27	525	525;707;730;862;168;906;976;1001	0.00074738	11.015	1.1484	1.6328	48.228	2	1	Median	915080	410540	504540	LYTQGYISYPR;SLLLDWDR				533	5708;7305	True;True	6050;7861	8614;11245	13114;17077	13114;17077			9606;9606;9606;9606;9606;9606;9606;9606
SUZ12	Polycomb protein SUZ12	1.6314	J3QQW9;Q15022	J3QQW9;Q15022	2;2	2;2	2;2	tr|J3QQW9|J3QQW9_HUMAN Isoform of Q15022, Polycomb protein SUZ12 OS=Homo sapiens OX=9606 GN=SUZ12 PE=1 SV=1;sp|Q15022|SUZ12_HUMAN Polycomb protein SUZ12 OS=Homo sapiens OX=9606 GN=SUZ12 PE=1 SV=3	2	2	2	2	3.1	3.1	3.1	80.321	716	716;739	0	12.794	1.2534	1.6314	10.209	2	0	Median	1005200	446920	558290	ALETDSVSGVSK;ATWETILDGK				617	506;885	True;True	536;941	761;1315	1144;1145;1146;1970;1971	1144;1970			9606;9606
HIST2H2AB	Histone H2A type 2-B	1.5877	Q8IUE6	Q8IUE6	3	2	1	sp|Q8IUE6|H2A2B_HUMAN Histone H2A type 2-B OS=Homo sapiens OX=9606 GN=HIST2H2AB PE=1 SV=3	1	3	2	1	17.7	10.8	5.4	13.995	130	130	0	12.153	1.4406	1.5877	5.204	2	0	Median	8997000	3734700	5262300	AGLQFPVGR;HLQLAVR;NDEELNK				1372	332;3521;6040	False;True;True	349;3731;6512	478;5312;9232	717;718;719;720;721;8149;14028	721;8149;14028			9606
VBP1	Prefoldin subunit 3	1.5624	P61758-2;P61758	P61758-2;P61758	3;3	3;3	3;3	sp|P61758-2|PFD3-2_HUMAN Isoform of P61758, Isoform 2 of Prefoldin subunit 3 OS=Homo sapiens OX=9606 GN=VBP1 PE=1 SV=4;sp|P61758|PFD3_HUMAN Prefoldin subunit 3 OS=Homo sapiens OX=9606 GN=VBP1 PE=1 SV=4	2	3	3	3	17.2	17.2	17.2	22.254	192	192;197	0	24.219	1.369	1.5624	7.5073	5	1	Leave out requantified	1897000	754610	1142400	DQFTTTEVNMAR;FMELNLAQK;QPGNETADTVLK				1078	1378;2636;6747	True;True;True	1478;1479;2807;2808;7274	2102;2103;3989;3990;10386	3188;3189;6122;6123;15821	3189;6122;15821	757;758	58;171	9606;9606
PPP6R1	Serine/threonine-protein phosphatase 6 regulatory subunit 1	1.559	Q9UPN7	Q9UPN7	2	2	2	sp|Q9UPN7|PP6R1_HUMAN Serine/threonine-protein phosphatase 6 regulatory subunit 1 OS=Homo sapiens OX=9606 GN=PPP6R1 PE=1 SV=5	1	2	2	2	2.5	2.5	2.5	96.723	881	881	0	11.442	1.1843	1.559	97.856	2	0	Median	1076400	569220	507150	QDVVNWLNEEK;VAGALVQNTEK				1668	6599;8369	True;True	7119;8993	10165;12895	15510;19620	15510;19620			9606
HIST1H2BN;HIST1H2BL;HIST1H2BM;HIST1H2BH;HIST2H2BF;HIST1H2BC;HIST1H2BD;H2BFS;HIST1H2BK;HIST1H2BA	Histone H2B;Histone H2B type 1-L;Histone H2B type 1-M;Histone H2B type 1-N;Histone H2B type 1-H;Histone H2B type 2-F;Histone H2B type 1-C/E/F/G/I;Histone H2B type 1-D;Histone H2B type F-S;Histone H2B type 1-K;Histone H2B type 1-A	1.5583	U3KQK0;Q99880;Q99879;Q99877;Q93079;Q5QNW6;P62807;P58876;P57053;O60814;Q5QNW6-2;Q96A08;A0A2R8Y619	U3KQK0;Q99880;Q99879;Q99877;Q93079;Q5QNW6;P62807;P58876;P57053;O60814;Q5QNW6-2;Q96A08	6;6;6;6;6;6;6;6;6;6;6;3;1	2;2;2;2;2;2;2;2;2;2;2;0;0	2;2;2;2;2;2;2;2;2;2;2;0;0	tr|U3KQK0|U3KQK0_HUMAN Isoform of Q99877, Histone H2B OS=Homo sapiens OX=9606 GN=HIST1H2BN PE=1 SV=1;sp|Q99880|H2B1L_HUMAN Histone H2B type 1-L OS=Homo sapiens OX=9606 GN=HIST1H2BL PE=1 SV=3;sp|Q99879|H2B1M_HUMAN Histone H2B type 1-M OS=Homo sapiens OX=960	13	6	2	2	28.9	6	6	18.804	166	166;126;126;126;126;126;126;126;126;126;134;127;122	0	11.713	1.4222	1.5583	7.6366	4	0	Leave out requantified	66254000	27473000	38781000	AMGIMNSFVNDIFER;ESYSVYVYK;KESYSVYVYK;LLLPGELAK;QVHPDTGISSK;VLKQVHPDTGISSK				723	609;2284;4336;5106;6817;8790	False;True;True;False;False;False	647;2428;4603;5415;7344;9436	899;900;901;902;3458;3459;3460;6571;7748;10486;10487;10488;13559	1351;1352;1353;1354;1355;1356;1357;5311;5312;5313;5314;10100;11812;15965;15966;15967;20668	1351;5311;10100;11812;15966;20668	415;416	60;63	9606;9606;9606;9606;9606;9606;9606;9606;9606;9606;9606;9606;9606
KEAP1	Kelch-like ECH-associated protein 1	1.5492	Q14145;K7EQX2;K7EJ49;K7EJD8;K7ESE0	Q14145;K7EQX2;K7EJ49;K7EJD8;K7ESE0	2;1;1;1;1	2;1;1;1;1	2;1;1;1;1	sp|Q14145|KEAP1_HUMAN Kelch-like ECH-associated protein 1 OS=Homo sapiens OX=9606 GN=KEAP1 PE=1 SV=2;tr|K7EQX2|K7EQX2_HUMAN Isoform of Q14145, Kelch-like ECH-associated protein 1 (Fragment) OS=Homo sapiens OX=9606 GN=KEAP1 PE=1 SV=1;tr|K7EJ49|K7EJ49_HUMAN	5	2	2	2	3.8	3.8	3.8	69.666	624	624;172;212;213;279	0	12.15	1.1788	1.5492	75.975	2	1	Median	1030300	440340	589970	LLYAVGGFDGTNR;TFSYTLEDHTK				1226	5188;7845	True;True	5502;8439	7861;12077	11985;18377;18378	11985;18377			9606;9606;9606;9606;9606
PALLD	Palladin	1.5195	Q8WX93-4;Q8WX93-8;Q8WX93-3;Q8WX93-5;Q8WX93;Q8WX93-2;Q8WX93-9;Q8WX93-7;H0YA05;A0A3B3ISX8;D6R9F5;F8WA26;A0A087WX60;Q86TC9-2;Q86TC9	Q8WX93-4;Q8WX93-8;Q8WX93-3;Q8WX93-5;Q8WX93;Q8WX93-2;Q8WX93-9;Q8WX93-7	13;13;13;13;13;11;11;10;6;2;1;1;1;1;1	13;13;13;13;13;11;11;10;6;2;1;1;1;1;1	13;13;13;13;13;11;11;10;6;2;1;1;1;1;1	sp|Q8WX93-4|PALLD-4_HUMAN Isoform of Q8WX93, Isoform 4 of Palladin OS=Homo sapiens OX=9606 GN=PALLD PE=1 SV=3;sp|Q8WX93-8|PALLD-8_HUMAN Isoform of Q8WX93, Isoform 8 of Palladin OS=Homo sapiens OX=9606 GN=PALLD PE=1 SV=3;sp|Q8WX93-3|PALLD-3_HUMAN Isoform of	15	13	13	13	20.8	20.8	20.8	73.321	672	672;777;1001;1159;1383;1106;1123;385;160;384;90;164;1026;1045;1320	0	88.404	1.1774	1.5195	10.129	22	2	Leave out requantified	21815000	10292000	11522000	DAVIQDLER;DSGDENEPIQER;EDAGWYTVSAK;ENESLTHSTDR;ENGVHSLIIEPVTSR;IASDEEIQGTK;KENESLTHSTDR;LDVYTQWHQQSQSTKPK;LISEIEYR;LMVQAVNQR;LQNTGVADGYPVR;NEAGIVSCTAR;YAALSDQGLDIK				1424	1078;1420;1686;2143;2147;3635;4334;4666;4972;5222;5366;6055;9270	True;True;True;True;True;True;True;True;True;True;True;True;True	1150;1521;1801;2284;2288;3850;4601;4950;5277;5547;5696;6527;9947	1645;1646;2163;2164;2566;2567;3252;3253;3259;5484;6567;7066;7067;7068;7533;7534;7914;7915;8138;8139;9257;14270;14271;14272;14273	2492;2493;3277;3278;3279;3280;3912;3913;3914;5004;5005;5015;5016;8419;8420;10095;10096;10812;10813;10814;10815;10816;10817;11513;11514;12062;12063;12405;12406;12407;12408;12409;14068;21773;21774;21775;21776;21777;21778;21779	2493;3278;3914;5004;5016;8419;10096;10816;11514;12063;12409;14068;21778	1039	380	9606;9606;9606;9606;9606;9606;9606;9606;9606;9606;9606;9606;9606;9606;9606
HIST1H4A	Histone H4	1.5052	P62805	P62805	10	10	10	sp|P62805|H4_HUMAN Histone H4 OS=Homo sapiens OX=9606 GN=HIST4H4 PE=1 SV=2	1	10	10	10	54.4	54.4	54.4	11.367	103	103	0	75.659	1.4513	1.5052	11.25	35	3	Leave out requantified	1224600000	507010000	717630000	DAVTYTEHAK;DAVTYTEHAKR;DNIQGITK;DNIQGITKPAIR;ISGLIYEETR;KTVTAMDVVYALK;RISGLIYEETR;TVTAMDVVYALK;TVTAMDVVYALKR;VFLENVIR				1102	1081;1082;1336;1337;4142;4451;6875;8298;8299;8546	True;True;True;True;True;True;True;True;True;True	1153;1154;1429;1430;4395;4727;7404;8917;8918;8919;8920;9183	1649;1650;1651;1652;1653;2032;2033;2034;2035;2036;2037;2038;2039;2040;6255;6256;6257;6258;6753;6754;10583;12782;12783;12784;12785;12786;12787;12788;12789;12790;12791;12792;12793;12794;13179	2496;2497;2498;2499;2500;2501;2502;3070;3071;3072;3073;3074;3075;3076;3077;3078;3079;3080;3081;3082;3083;3084;3085;9617;9618;9619;9620;9621;9622;9623;9624;9625;9626;9627;10344;10345;10346;10347;16106;16107;19450;19451;19452;19453;19454;19455;19456;19457;19458;19459;19460;19461;19462;19463;19464;19465;19466;19467;19468;19469;20090;20091;20092	2496;2502;3071;3082;9618;10347;16106;19453;19465;20091	777	85	9606
HSPA4L	Heat shock 70 kDa protein 4L	1.5017	O95757;E9PDE8;D6RJ96	O95757;E9PDE8;D6RJ96	5;5;4	2;2;1	2;2;1	sp|O95757|HS74L_HUMAN Heat shock 70 kDa protein 4L OS=Homo sapiens OX=9606 GN=HSPA4L PE=1 SV=3;tr|E9PDE8|E9PDE8_HUMAN Isoform of O95757, Heat shock 70 kDa protein 4L OS=Homo sapiens OX=9606 GN=HSPA4L PE=1 SV=1;tr|D6RJ96|D6RJ96_HUMAN Isoform of O95757, Heat	3	5	2	2	7	2.9	2.9	94.511	839	839;813;531	0	12.881	1.0853	1.5017	6.753	2	0	Median	1376000	744790	631200	DISTTLNADEAVAR;GCALQCAILSPAFK;LYQECEK;NAVEEYVYDFR;VLATTFDPYLGGR				401	1230;2850;5699;6029;8717	False;False;False;True;True	1311;3033;6041;6500;9361	1869;4298;8599;9216;13433	2821;2822;6604;6605;13090;14002;20492	2822;6604;13090;14002;20492			9606;9606;9606
SPAG5	Sperm-associated antigen 5	1.4938	Q96R06;K7ELG0;K7ELC8;E9PMD0	Q96R06	5;2;1;1	5;2;1;1	5;2;1;1	sp|Q96R06|SPAG5_HUMAN Sperm-associated antigen 5 OS=Homo sapiens OX=9606 GN=SPAG5 PE=1 SV=2	4	5	5	5	5.4	5.4	5.4	134.42	1193	1193;185;186;336	0	35.298	1.0899	1.4938	15.428	5	1	Leave out requantified	5932400	4778700	1153800	ELQEVIQQQNEK;ISQLEQDLASMR;LASTIADNQEQDLEK;LQAQEEQHQEVQK;STNTSQTGLVGTK				1494	2077;4164;4581;5316;7580	True;True;True;True;True	2212;4418;4862;5644;8158	3167;6293;6943;8065;11653	4869;9673;10635;12291;17734;17735	4869;9673;10635;12291;17734			9606;9606;9606;9606
HIST3H2BB;HIST2H2BE;HIST1H2BB;HIST1H2BO;HIST1H2BJ	Histone H2B type 3-B;Histone H2B type 2-E;Histone H2B type 1-B;Histone H2B type 1-O;Histone H2B type 1-J	1.4797	Q8N257;Q16778;P33778;P23527;P06899;Q6DRA6;Q6DN03	Q8N257;Q16778;P33778;P23527;P06899	6;6;6;6;6;2;2	6;6;6;6;6;2;2	2;2;2;2;2;2;2	sp|Q8N257|H2B3B_HUMAN Histone H2B type 3-B OS=Homo sapiens OX=9606 GN=HIST3H2BB PE=1 SV=3;sp|Q16778|H2B2E_HUMAN Histone H2B type 2-E OS=Homo sapiens OX=9606 GN=HIST2H2BE PE=1 SV=3;sp|P33778|H2B1B_HUMAN Histone H2B type 1-B OS=Homo sapiens OX=9606 GN=HIST1H	7	6	6	2	38.1	38.1	7.9	13.908	126	126;126;126;126;126;164;193	0	56.181	1.4169	1.4797	45.275	11	1	Leave out requantified	196120000	80640000	115480000	AMGIMNSFVNDIFER;ESYSIYVYK;KESYSIYVYK;LLLPGELAK;QVHPDTGISSK;VLKQVHPDTGISSK				805	609;2283;4335;5106;6817;8790	True;True;True;True;True;True	647;2427;4602;5415;7344;9436	899;900;901;902;3456;3457;6568;6569;6570;7748;10486;10487;10488;13559	1351;1352;1353;1354;1355;1356;1357;5307;5308;5309;5310;10097;10098;10099;11812;15965;15966;15967;20668	1351;5308;10098;11812;15966;20668	415;416	60;63	9606;9606;9606;9606;9606;9606;9606
PFDN5	Prefoldin subunit 5	1.461	H3BMQ1;H3BPF6;Q99471-3;Q99471	H3BMQ1;H3BPF6;Q99471-3;Q99471	1;1;1;1	1;1;1;1	1;1;1;1	tr|H3BMQ1|H3BMQ1_HUMAN Isoform of Q99471, Prefoldin subunit 5 OS=Homo sapiens OX=9606 GN=PFDN5 PE=1 SV=1;tr|H3BPF6|H3BPF6_HUMAN Isoform of Q99471, Prefoldin subunit 5 (Fragment) OS=Homo sapiens OX=9606 GN=PFDN5 PE=1 SV=1;sp|Q99471-3|PFD5-3_HUMAN Isoform of	4	1	1	1	17.9	17.9	17.9	9.5351	84	84;152;109;154	0	12.658	1.3124	1.461	0.56895	2	0	Median	1137300	491580	645710	IQQLTALGAAQATAK				552	4099	TRUE	4351	6196;6197	9533;9534;9535;9536	9534			9606;9606;9606;9606
EIF4G1	Eukaryotic translation initiation factor 4 gamma 1	1.4607	E9PGM1;E7EUU4;Q04637-8;E7EX73;Q04637-4;Q04637-5;Q04637-7;Q04637-3;Q04637;Q04637-9;Q04637-6;C9JF13;C9J6B6;C9J2Z7;C9K073;H7C044;H7C0V6;A0A0A0MSA7;A0A0U1RQK7;O43432-4;O43432;O43432-3;C9JHW9;F8WCF2	E9PGM1;E7EUU4;Q04637-8;E7EX73;Q04637-4;Q04637-5;Q04637-7;Q04637-3;Q04637;Q04637-9;Q04637-6	24;24;24;24;23;23;23;23;23;23;22;9;9;8;8;6;3;2;2;2;2;2;1;1	24;24;24;24;23;23;23;23;23;23;22;9;9;8;8;6;3;2;2;2;2;2;1;1	24;24;24;24;23;23;23;23;23;23;22;9;9;8;8;6;3;2;2;2;2;2;1;1	tr|E9PGM1|E9PGM1_HUMAN Isoform of Q04637, Eukaryotic translation initiation factor 4 gamma 1 OS=Homo sapiens OX=9606 GN=EIF4G1 PE=1 SV=1;tr|E7EUU4|E7EUU4_HUMAN Isoform of Q04637, Eukaryotic translation initiation factor 4 gamma 1 OS=Homo sapiens OX=9606 GN	24	24	24	24	15.9	15.9	15.9	166.75	1513	1513;1560;1600;1436;1512;1435;1404;1559;1599;1606;1403;903;757;833;869;226;180;1621;1774;1305;1585;1591;160;50	0	171.36	1.0795	1.4607	24.022	40	3	Leave out requantified	32939000	15199000	17741000	AALSEEELEKK;AASLTEDR;ALPSEELNR;DITEEIMSGAR;EAVGDLLDAFK;EITKPLRPLGK;EMDEAATAEER;ERPSQPEGLR;FIGELFK;FSALQQAVPTESTDNR;FSALQQAVPTESTDNRR;GPQAGLGPR;GSSGGSGAKPSDAASEAAR;GSSGGSGAKPSDAASEAARPATSTLNR;GVIDLIFEK;HGVESTLER;IHNAENIQPGEQK;LTPQMFQQLMK;MDQYFNQMEK;PATSTLNR;QVTQLAIDTEER;SDQWKPLNLEEK;VEYTLGEESEAPGQR;YLCDEQK				384	82;116;547;1231;1667;1955;2119;2237;2569;2699;2700;3213;3284;3285;3353;3478;3837;5550;5755;6470;6828;7029;8523;9426	True;True;True;True;True;True;True;True;True;True;True;True;True;True;True;True;True;True;True;True;True;True;True;True	89;124;582;1312;1313;1781;2086;2256;2257;2379;2733;2877;2878;3412;3483;3484;3558;3684;4062;5887;6118;6979;7356;7568;9159;10110	113;152;813;814;1870;1871;2527;2528;2979;3215;3216;3217;3218;3391;3878;4076;4077;4078;4829;4830;4939;4940;4941;4942;5058;5059;5249;5789;8383;8384;8693;9980;9981;10508;10509;10807;13143;13144;13145;13146;14516	177;178;179;233;234;1221;1222;2823;2824;2825;2826;3856;3857;3858;3859;3860;4557;4941;4942;4943;4944;4945;4946;4947;4948;5213;5959;6262;6263;6264;6265;6266;7421;7422;7423;7576;7577;7578;7579;7580;7762;7763;8061;8903;8904;12763;12764;13235;13236;15221;15222;15994;15995;16439;16440;20031;20032;20033;20034;20035;20036;22159	178;234;1221;2825;3858;4557;4948;5213;5959;6262;6265;7422;7577;7580;7763;8061;8904;12763;13235;15221;15994;16440;20032;22159	234;235	110;782	9606;9606;9606;9606;9606;9606;9606;9606;9606;9606;9606;9606;9606;9606;9606;9606;9606;9606;9606;9606;9606;9606;9606;9606
H3F3B;H3F3A;HIST2H3A;HIST3H3;HIST1H3A;H3F3C	Histone H3;Histone H3.2;Histone H3.1t;Histone H3.3;Histone H3.1;Histone H3.3C	1.4561	K7EMV3;B4DEB1;K7EK07;K7ES00;Q71DI3;Q16695;P84243;P68431;K7EP01;Q6NXT2	K7EMV3;B4DEB1;K7EK07;K7ES00;Q71DI3;Q16695;P84243;P68431;K7EP01;Q6NXT2	2;2;2;2;2;2;2;2;1;1	2;2;2;2;2;2;2;2;1;1	1;1;1;1;1;1;1;1;0;0	tr|K7EMV3|K7EMV3_HUMAN Isoform of P84243, Histone H3 OS=Homo sapiens OX=9606 GN=H3F3B PE=1 SV=1;tr|B4DEB1|B4DEB1_HUMAN Isoform of P84243, Histone H3 OS=Homo sapiens OX=9606 GN=H3F3A PE=1 SV=1;tr|K7EK07|K7EK07_HUMAN Isoform of P84243, Histone H3 (Fragment)	10	2	2	1	15.2	15.2	7.6	10.334	92	92;123;132;151;136;136;136;136;113;135	0	11.989	1.4221	1.4561	7.9246	3	0	Plateau	246110000	99970000	146140000	EIAQDFK;STELLIR				241	1907;7553	True;True	2035;8131	2908;2909;11617	4449;4450;17679;17680	4449;17679			9606;9606;9606;9606;9606;9606;9606;9606;9606;9606
TRIB1	Tribbles homolog 1	1.4561	Q96RU8;Q96RU8-2;E5RFH4	Q96RU8	8;3;2	8;3;2	8;3;2	sp|Q96RU8|TRIB1_HUMAN Tribbles homolog 1 OS=Homo sapiens OX=9606 GN=TRIB1 PE=1 SV=2	3	8	8	8	23.9	23.9	23.9	41.008	372	372;206;141	0	56.587	1.1293	1.4561	8.2727	8	0	Leave out requantified	11011000	4804900	6205800	DFGDMHSYVR;GEDDALSDK;GPALLFPATR;IADYLLLPLAER;LESLEDTHIMK;LLDADDAAAVAAK;SAMSGASQPR;YPFHDSDPSALFSK				1496	1130;2894;3190;3602;4745;5023;6970;9495	True;True;True;True;True;True;True;True	1203;3077;3387;3815;5034;5331;7507;10189	1724;4355;4794;5434;7196;7623;10730;14635	2607;6691;7357;7358;8341;8342;11002;11635;11636;11637;16321;16322;22346	2607;6691;7357;8342;11002;11636;16321;22346			9606;9606;9606
PFDN1	Prefoldin subunit 1	1.4545	E5RGS4;O60925	E5RGS4;O60925	2;2	2;2	2;2	tr|E5RGS4|E5RGS4_HUMAN Isoform of O60925, Prefoldin subunit 1 OS=Homo sapiens OX=9606 GN=PFDN1 PE=1 SV=1;sp|O60925|PFD1_HUMAN Prefoldin subunit 1 OS=Homo sapiens OX=9606 GN=PFDN1 PE=1 SV=2	2	2	2	2	17.9	17.9	17.9	13.466	117	117;122	0	14.045	1.2438	1.4545	21.194	2	0	Median	1114100	541580	572470	EAIHSQLLEK;LADIQIEQLNR				357	1598;4500	True;True	1707;4777	2420;6832	3679;10457;10458	3679;10457			9606;9606
HSPH1	Heat shock protein 105 kDa	1.4525	Q92598-2;Q92598-3;Q92598;Q92598-4;A0A0A0MSM0;R4GN69;Q5TBM3	Q92598-2;Q92598-3;Q92598;Q92598-4;A0A0A0MSM0	15;15;15;14;13;4;1	15;15;15;14;13;4;1	12;12;12;11;10;4;1	sp|Q92598-2|HS105-2_HUMAN Isoform of Q92598, Isoform Beta of Heat shock protein 105 kDa OS=Homo sapiens OX=9606 GN=HSPH1 PE=1 SV=1;sp|Q92598-3|HS105-3_HUMAN Isoform of Q92598, Isoform 3 of Heat shock protein 105 kDa OS=Homo sapiens OX=9606 GN=HSPH1 PE=1 SV	7	15	15	12	21.6	21.6	17.3	92.115	814	814;817;858;860;782;115;115	0	116.91	1.1325	1.4525	8.0729	20	3	Leave out requantified	31593000	15084000	16508000	AFNDPFIQK;AGGIETIANEFSDR;DISTTLNADEAVAR;DLLNMYIETEGK;ENLSYDLVPLK;FICEQDHQNFLR;FQEAEERPK;FVVQNVSAQK;GCALQCAILSPAFK;LYQECEK;NAVEEYVYEFR;NQQITHANNTVSNFK;VEDVSAVEIVGGATR;VLGTAFDPFLGGK;YNHIDESEMK				1436	292;317;1230;1289;2153;2562;2679;2772;2850;5699;6030;6320;8480;8769;9480	True;True;True;True;True;True;True;True;True;True;True;True;True;True;True	309;334;1311;1374;2294;2726;2856;2951;3033;6041;6501;6815;9111;9415;10169	417;461;1869;1954;1955;3266;3868;4051;4181;4298;8599;9217;9736;9737;13072;13073;13074;13527;13528;13529;14602	623;624;625;692;693;694;695;2821;2822;2951;2952;2953;2954;5027;5028;5946;5947;6226;6417;6418;6604;6605;13090;14003;14004;14005;14820;14821;19909;19910;19911;20619;20620;20621;20622;22297	623;695;2822;2951;5028;5947;6226;6417;6604;13090;14005;14821;19911;20620;22297	1043	569	9606;9606;9606;9606;9606;9606;9606
MSH6	DNA mismatch repair protein Msh6	1.4503	A0A494C0M1;P52701-4;P52701-3;P52701;A0A087WWJ1;P52701-2;A0A087WYT6	A0A494C0M1;P52701-4;P52701-3;P52701;A0A087WWJ1;P52701-2	3;3;3;3;2;2;1	3;3;3;3;2;2;1	3;3;3;3;2;2;1	tr|A0A494C0M1|A0A494C0M1_HUMAN Isoform of P52701, DNA mismatch repair protein Msh6 OS=Homo sapiens OX=9606 GN=MSH6 PE=4 SV=1;sp|P52701-4|MSH6-4_HUMAN Isoform of P52701, Isoform 4 of DNA mismatch repair protein Msh6 OS=Homo sapiens OX=9606 GN=MSH6 PE=1 SV=2	7	3	3	3	2.9	2.9	2.9	142.85	1261	1261;1058;1230;1360;1067;1068;327	0	18.61	1.066	1.4503	24.433	3	1	Median	2199100	981300	1217800	GMTSESDSIGLTPGEK;LANLINAEER;LANLPEEVIQK				192	3164;4550;4551	True;True;True	3359;4829;4830	4756;6901;6902	7297;10566;10567	7297;10566;10567			9606;9606;9606;9606;9606;9606;9606
XRCC6	X-ray repair cross-complementing protein 6	1.4407	B1AHC9;P12956;P12956-2	B1AHC9;P12956;P12956-2	12;12;11	12;12;11	12;12;11	tr|B1AHC9|B1AHC9_HUMAN Isoform of P12956, X-ray repair cross-complementing protein 6 OS=Homo sapiens OX=9606 GN=XRCC6 PE=1 SV=1;sp|P12956|XRCC6_HUMAN X-ray repair cross-complementing protein 6 OS=Homo sapiens OX=9606 GN=XRCC6 PE=1 SV=2;sp|P12956-2|XRCC6-2_	3	12	12	12	24.5	24.5	24.5	64.283	559	559;609;568	0	91.034	1.216	1.4407	13.311	18	1	Leave out requantified	35571000	15714000	19857000	DIISIAEDEDLR;DTGIFLDLMHLK;ILELDQFK;IMATPEQVGK;IMLFTNEDNPHGNDSAK;KQELLEALTK;LGSLVDEFK;NIYVLQELDNPGAK;QIILEKEETEELKR;SDSFENPVLQQHFR;TFNTSTGGLLLPSDTK;TFNTSTGGLLLPSDTKR				228	1211;1452;3927;3999;4011;4422;4901;6153;6669;7030;7836;7837	True;True;True;True;True;True;True;True;True;True;True;True	1292;1555;4156;4233;4250;4251;4694;5201;6628;7194;7569;8430;8431	1842;2203;2204;2205;5940;6046;6066;6067;6068;6702;7423;9422;9423;10273;10274;10808;12062;12063;12064	2779;2780;2781;3344;3345;3346;3347;3348;9119;9120;9298;9299;9300;9328;9329;9330;9331;9332;10275;11339;11340;14332;14333;14334;14335;14336;15658;15659;16441;16442;18353;18354;18355;18356;18357	2780;3345;9119;9299;9328;10275;11340;14332;15658;16441;18356;18357	161;162;163	117;153;403	9606;9606;9606
GTF2H4	General transcription factor IIH subunit 4	1.4386	Q92759;A0A0G2JHJ2;Q92759-2	Q92759	3;1;1	3;1;1	3;1;1	sp|Q92759|TF2H4_HUMAN General transcription factor IIH subunit 4 OS=Homo sapiens OX=9606 GN=GTF2H4 PE=1 SV=1	3	3	3	3	7.8	7.8	7.8	52.186	462	462;138;220	0	21.27	1.0152	1.4386	14.324	3	0	Leave out requantified	1704700	780550	924110	AQEESTGLLSGLR;ELGVLVFENSAK;FPNMVVAQVTR				1444	701;2038;2670	True;True;True	747;2173;2847	1059;3107;4040	1586;4768;4769;6209	1586;4769;6209			9606;9606;9606
DMAP1	DNA methyltransferase 1-associated protein 1	1.4363	Q9NPF5;Q5TG40;Q5TG38;Q5TG39;Q5TG36;Q5TG37	Q9NPF5;Q5TG40;Q5TG38;Q5TG39	6;4;3;3;2;1	6;4;3;3;2;1	6;4;3;3;2;1	sp|Q9NPF5|DMAP1_HUMAN DNA methyltransferase 1-associated protein 1 OS=Homo sapiens OX=9606 GN=DMAP1 PE=1 SV=1;tr|Q5TG40|Q5TG40_HUMAN Isoform of Q9NPF5, DNA methyltransferase 1-associated protein 1 (Fragment) OS=Homo sapiens OX=9606 GN=DMAP1 PE=1 SV=1;tr|Q5	6	6	6	6	15.6	15.6	15.6	52.992	467	467;302;237;285;151;132	0	37.515	1.0069	1.4363	21.251	6	1	Leave out requantified	2782000	1329200	1452800	DILELGGPEGDAASGTISK;EAEKPAVPETAGIK;IPVFDAGHER;LITAADTTAEQR;SDLVLLYELK;SSETLTFK				1591	1213;1571;4065;4978;7025;7492	True;True;True;True;True;True	1294;1676;4317;5283;7564;8068	1844;2382;6158;7543;10802;11529	2783;3620;9479;11528;11529;16431;17534	2783;3620;9479;11529;16431;17534			9606;9606;9606;9606;9606;9606
GTF2H2C;GTF2H2	General transcription factor IIH subunit 2-like protein;General transcription factor IIH subunit 2	1.4335	D6RID8;Q6P1K8;Q13888;D6RAW1;D6RIT7;D6RGC9;R4GMS9;D6RJD3	D6RID8;Q6P1K8;Q13888;D6RAW1;D6RIT7;D6RGC9;R4GMS9;D6RJD3	2;2;2;1;1;1;1;1	2;2;2;1;1;1;1;1	2;2;2;1;1;1;1;1	tr|D6RID8|D6RID8_HUMAN Isoform of Q6P1K8, General transcription factor IIH subunit 2-like protein (Fragment) OS=Homo sapiens OX=9606 GN=GTF2H2C PE=1 SV=1;sp|Q6P1K8|T2H2L_HUMAN General transcription factor IIH subunit 2-like protein OS=Homo sapiens OX=9606	8	2	2	2	7.9	7.9	7.9	28.483	253	253;395;395;51;92;123;152;165	0	12.188	1.1035	1.4335	0.33731	2	0	Median	1099000	529890	569140	ATIEDILFK;VSVIGLSAEVR				351	852;9051	True;True	907;9717	1264;13933	1892;21267	1892;21267			9606;9606;9606;9606;9606;9606;9606;9606
DNAJC9	DnaJ homolog subfamily C member 9	1.4315	Q8WXX5	Q8WXX5	2	2	2	sp|Q8WXX5|DNJC9_HUMAN DnaJ homolog subfamily C member 9 OS=Homo sapiens OX=9606 GN=DNAJC9 PE=1 SV=1	1	2	2	2	8.5	8.5	8.5	29.909	260	260	0	12.554	1.2247	1.4315	1.4869	2	1	Median	1992200	794120	1198100	ELGLDEGVDSLK;GSEEELADIK				1427	2032;3266	True;True	2167;3465	3100;4909	4759;7539	4759;7539			9606
WDR26	WD repeat-containing protein 26	1.4293	Q9H7D7-2;Q9H7D7;C9JCS7;H0Y9R3	Q9H7D7-2;Q9H7D7;C9JCS7;H0Y9R3	2;2;1;1	2;2;1;1	2;2;1;1	sp|Q9H7D7-2|WDR26-2_HUMAN Isoform of Q9H7D7, Isoform 2 of WD repeat-containing protein 26 OS=Homo sapiens OX=9606 GN=WDR26 PE=1 SV=3;sp|Q9H7D7|WDR26_HUMAN WD repeat-containing protein 26 OS=Homo sapiens OX=9606 GN=WDR26 PE=1 SV=3;tr|C9JCS7|C9JCS7_HUMAN Iso	4	2	2	2	2.9	2.9	2.9	70.459	645	645;661;125;295	0	13.067	1.0567	1.4293	42.423	2	0	Median	1052000	584570	467390	TVLASDTHQR;VLEALQVLR				1574	8272;8736	True;True	8889;9382	12741;13475	19384;20546;20547	19384;20546			9606;9606;9606;9606
ALDH3A2	Fatty aldehyde dehydrogenase	1.4125	J3QRD1;P51648;P51648-2;J3KTD9;I3L2W1;J3QS00;I3L1M4	J3QRD1;P51648;P51648-2;J3KTD9;I3L2W1;J3QS00;I3L1M4	2;2;2;1;1;1;1	2;2;2;1;1;1;1	2;2;2;1;1;1;1	tr|J3QRD1|J3QRD1_HUMAN Isoform of P51648, Fatty aldehyde dehydrogenase OS=Homo sapiens OX=9606 GN=ALDH3A2 PE=1 SV=1;sp|P51648|AL3A2_HUMAN Fatty aldehyde dehydrogenase OS=Homo sapiens OX=9606 GN=ALDH3A2 PE=1 SV=1;sp|P51648-2|AL3A2-2_HUMAN Isoform of P51648,	7	2	2	2	6.1	6.1	6.1	44.648	393	393;485;508;62;97;134;162	0	11.814	1.0711	1.4125	119.59	2	2	Median	4917400	1264700	3652600	IAFGGETDEATR;NVDEAINFINER				619	3613;6396	True;True	3826;6904	5447;9867	8362;15029;15030	8362;15030			9606;9606;9606;9606;9606;9606;9606
PRDX2	Peroxiredoxin-2	1.4087	P32119;A6NIW5;P32119-2	P32119;A6NIW5	4;2;1	3;2;1	3;2;1	sp|P32119|PRDX2_HUMAN Peroxiredoxin-2 OS=Homo sapiens OX=9606 GN=PRDX2 PE=1 SV=5;tr|A6NIW5|A6NIW5_HUMAN Isoform of P32119, Peroxiredoxin 2, isoform CRA_a OS=Homo sapiens OX=9606 GN=PRDX2 PE=1 SV=2	3	4	3	3	19.2	13.6	13.6	21.892	198	198;136;142	0	19.686	1.3045	1.4087	155.23	2	1	Median	12302000	1676200	10626000	ATAVVDGAFK;GLFIIDGK;LSEDYGVLK;QITVNDLPVGR				940	831;3109;5427;6686	True;True;True;False	883;3303;5757;7212	1232;4682;8210;10300	1845;7187;7188;12504;15695	1845;7187;12504;15695			9606;9606;9606
ERCC3	TFIIH basal transcription factor complex helicase XPB subunit	1.4055	P19447;A0A2R8Y6W8;A0A2R8Y681	P19447;A0A2R8Y6W8;A0A2R8Y681	2;2;1	2;2;1	2;2;1	sp|P19447|ERCC3_HUMAN General transcription and DNA repair factor IIH helicase subunit XPB OS=Homo sapiens OX=9606 GN=ERCC3 PE=1 SV=1;tr|A0A2R8Y6W8|A0A2R8Y6W8_HUMAN Isoform of P19447, General transcription and DNA repair factor IIH helicase subunit XPB OS=	3	2	2	2	2.4	2.4	2.4	89.277	782	782;807;162	0	11.357	1.0257	1.4055	15.86	2	0	Median	964350	479190	485160	FLVDQGYSFK;LGLTATLVR				160	2629;4883	True;True	2798;5183	3979;7405	6106;11312	6106;11312			9606;9606;9606
GNL2	Nucleolar GTP-binding protein 2	1.3786	Q13823;H0YG10	Q13823;H0YG10	3;2	3;2	3;2	sp|Q13823|NOG2_HUMAN Nucleolar GTP-binding protein 2 OS=Homo sapiens OX=9606 GN=GNL2 PE=1 SV=1;tr|H0YG10|H0YG10_HUMAN Isoform of Q13823, Nucleolar GTP-binding protein 2 (Fragment) OS=Homo sapiens OX=9606 GN=GNL2 PE=1 SV=2	2	3	3	3	4.1	4.1	4.1	83.654	731	731;233	0	17.385	0.96937	1.3786	83.053	3	1	Median	2240300	1513000	727260	MVLNDWQR;QISVGFIGYPNVGK;SSVINTLR				1218	5972;6681;7541	True;True;True	6430;7207;8118	9117;10293;11597	13840;15684;17645	13840;15684;17645			9606;9606
RFC1	Replication factor C subunit 1	1.3736	P35251-2;P35251;A0A1W2PP02;H0Y8U4	P35251-2;P35251	10;10;2;1	10;10;2;1	10;10;2;1	sp|P35251-2|RFC1-2_HUMAN Isoform of P35251, Isoform 2 of Replication factor C subunit 1 OS=Homo sapiens OX=9606 GN=RFC1 PE=1 SV=4;sp|P35251|RFC1_HUMAN Replication factor C subunit 1 OS=Homo sapiens OX=9606 GN=RFC1 PE=1 SV=4	4	10	10	10	10.9	10.9	10.9	128.18	1147	1147;1148;289;187	0	71.789	1.0341	1.3736	9.3032	13	1	Leave out requantified	9704200	4686600	5017600	AADSICDGDLVDSQIR;AALLSGPPGVGK;AIVAESLNNTSIK;ALTYDQAK;EQVAEETSGDSK;GGIQELIGLIK;KDTEAGETFSSVQANLSK;QLHEDEEFAR;TIIGQQGDQSCANK;TVNMDYLSLLR				950	36;74;437;584;2229;2995;4318;6703;7932;8286	True;True;True;True;True;True;True;True;True;True	41;80;460;620;2371;3184;4582;7229;8531;8905	53;101;642;643;859;3376;3377;3378;4515;6537;10326;12201;12766	79;155;968;969;970;971;1298;5186;5187;5188;5189;5190;5191;6940;6941;6942;10058;15736;18570;18571;19425;19426;19427	79;155;970;1298;5191;6942;10058;15736;18570;19425			9606;9606;9606;9606
XRCC5	X-ray repair cross-complementing protein 5	1.366	P13010;C9JZ81;H7C0H9	P13010	9;2;1	9;2;1	9;2;1	sp|P13010|XRCC5_HUMAN X-ray repair cross-complementing protein 5 OS=Homo sapiens OX=9606 GN=XRCC5 PE=1 SV=3	3	9	9	9	13.9	13.9	13.9	82.704	732	732;131;19	0	60.566	1.1037	1.366	16.544	15	0	Leave out requantified	19149000	9303800	9844900	DQVTAQEIFQDNHEDGPTAK;EEASGSSVTAEEAK;FFMGNQVLK;HIEIFTDLSSR;SQIPLSK;SQLDIIIHSLK;TDTLEDLFPTTK;VITMFVQR;YGSDIVPFSK				844	1398;1738;2525;3484;7451;7452;7779;8692;9377	True;True;True;True;True;True;True;True;True	1499;1856;2685;2686;3691;8024;8025;8367;9335;10060	2131;2132;2665;2666;2667;2668;3822;3823;5258;11463;11464;11970;11971;13397;14446	3237;3238;4066;4067;4068;4069;4070;4071;4072;4073;4074;5874;5875;5876;8072;17436;17437;18193;18194;18195;18196;18197;18198;20439;22048;22049	3237;4070;5875;8072;17436;17437;18195;20439;22048	518	357	9606;9606;9606
DNAJC21	DnaJ homolog subfamily C member 21	1.3581	Q5F1R6;Q5F1R6-3;Q5F1R6-2;A0A2R8Y534;A0A2R8Y4Q0	Q5F1R6;Q5F1R6-3;Q5F1R6-2;A0A2R8Y534;A0A2R8Y4Q0	2;2;2;1;1	2;2;2;1;1	2;2;2;1;1	sp|Q5F1R6|DJC21_HUMAN DnaJ homolog subfamily C member 21 OS=Homo sapiens OX=9606 GN=DNAJC21 PE=1 SV=2;sp|Q5F1R6-3|DJC21-3_HUMAN Isoform of Q5F1R6, Isoform 3 of DnaJ homolog subfamily C member 21 OS=Homo sapiens OX=9606 GN=DNAJC21 PE=1 SV=2;sp|Q5F1R6-2|DJC2	5	2	2	2	5.5	5.5	5.5	62.027	531	531;544;576;415;473	0	17.268	1.1105	1.3581	2.0402	2	0	Median	575250	223230	352020	APSSSSLNSATSSQSK;NLDNAAEAAEQFK				1297	675;6179	True;True	720;6656	1007;1008;9478	1512;1513;14416	1513;14416			9606;9606;9606;9606;9606
DNAJA1	DnaJ homolog subfamily A member 1	1.3557	P31689;P31689-2	P31689;P31689-2	5;4	5;4	5;4	sp|P31689|DNJA1_HUMAN DnaJ homolog subfamily A member 1 OS=Homo sapiens OX=9606 GN=DNAJA1 PE=1 SV=2;sp|P31689-2|DNJA1-2_HUMAN Isoform of P31689, Isoform 2 of DnaJ homolog subfamily A member 1 OS=Homo sapiens OX=9606 GN=DNAJA1 PE=1 SV=2	2	5	5	5	16.9	16.9	16.9	44.868	397	397;331	0	60.949	1.1644	1.3557	4.0192	8	1	Leave out requantified	49522000	33268000	16254000	DHAVFTR;ETTYYDVLGVKPNATQEELKK;QISQAYEVLSDAK;TIVITSHPGQIVK;VNFPENGFLSPDK				934	1190;2322;6679;7955;8889	True;True;True;True;True	1270;2467;7205;8554;9548	1808;3509;3510;10291;12241;12242;12243;12244;13710	2729;5391;5392;15682;18645;18646;18647;18648;18649;18650;18651;20928	2729;5392;15682;18648;20928			9606;9606
HLA-A	HLA class I histocompatibility antigen, A-69 alpha chain;HLA class I histocompatibility antigen, A-2 alpha chain;HLA class I histocompatibility antigen, A-68 alpha chain;HLA class I histocompatibility antigen, A-26 alpha chain;HLA class I histocompatibility antigen, A-74 alpha chain;HLA class I histocompatibility antigen, A-32 alpha chain;HLA class I histocompatibility antigen, A-31 alpha chain;H…	1.3526	A0A140T955;A0A140T9I0;A0A140T933;A0A1W2PRT9;P10316;P01892;A0A140T913;A0A140T9X5;A0A1W2PPQ2;P01891;A0A140T975;A0A140T8Y4;A0A140T8W8;A0A0G2JPD3;B0UXQ0;A0A140T941;A0A140T9Z6;A0A1W2PS39;A0A1W2PPF8;A0A1W2PR61;A0A1W2PQS8;P30450;P30459;P10314;P16189;P16190;P30512;P30453;P30456;P30457;P18462;Q9GJ45;Q09160;A0A0D9SFW8;P30511;P30511-3	A0A140T955;A0A140T9I0;A0A140T933;A0A1W2PRT9;P10316;P01892;A0A140T913;A0A140T9X5;A0A1W2PPQ2;P01891;A0A140T975;A0A140T8Y4;A0A140T8W8;A0A0G2JPD3;B0UXQ0;A0A140T941;A0A140T9Z6;A0A1W2PS39;A0A1W2PPF8;A0A1W2PR61;A0A1W2PQS8;P30450;P30459;P10314;P16189;P16190;P30512;P30453;P30456;P30457;P18462;Q9GJ45;Q09160	6;6;6;6;6;6;6;6;6;5;4;4;4;4;4;4;4;4;4;4;4;4;4;4;4;4;4;4;4;4;4;4;3;1;1;1	2;2;2;2;2;2;2;2;2;2;1;1;1;1;1;1;1;1;1;1;1;1;1;1;1;1;1;1;1;1;1;1;0;0;0;0	1;1;1;1;1;1;1;1;1;1;0;0;0;0;0;0;0;0;0;0;0;0;0;0;0;0;0;0;0;0;0;0;0;0;0;0	tr|A0A140T955|A0A140T955_HUMAN Isoform of P01891, HLA class I histocompatibility antigen, A-3 alpha chain OS=Homo sapiens OX=9606 GN=HLA-A PE=1 SV=1;tr|A0A140T9I0|A0A140T9I0_HUMAN Isoform of P01891, HLA class I histocompatibility antigen, A-3 alpha chain (	36	6	2	1	19.7	7.4	4.3	34.288	299	299;365;299;362;365;365;371;371;339;365;299;371;299;394;365;299;342;339;339;325;325;365;365;365;365;365;365;365;365;365;365;326;365;143;346;442	0	13.071	1.0316	1.3526	4.3544	2	0	Median	960110	461470	498640	DGEDQTQDTELVETR;DGEDQTQDTELVETRPAGDGTFQK;FDSDAASQR;PAGDGTFQK;SWTAADMAAQTTK;WAAVVVPSGQEQR				130	1159;1160;2484;6456;7658;9230	False;False;True;False;True;False	1235;1236;2643;6964;8238;9905	1763;1764;3761;9958;11756;14207	2661;2662;2663;2664;2665;5772;15177;17880;17881;17882;17883;21679;21680	2662;2665;5772;15177;17883;21679			9606;9606;9606;9606;9606;9606;9606;9606;9606;9606;9606;9606;9606;9606;9606;9606;9606;9606;9606;9606;9606;9606;9606;9606;9606;9606;9606;9606;9606;9606;9606;9606;9606;9606;9606;9606
TPP2	Tripeptidyl-peptidase 2	1.3408	A0A494C1B8;Q5VZU9;P29144;A0A494C0U1	A0A494C1B8;Q5VZU9;P29144;A0A494C0U1	5;5;5;3	5;5;5;3	5;5;5;3	tr|A0A494C1B8|A0A494C1B8_HUMAN Isoform of P29144, Tripeptidyl-peptidase 2 OS=Homo sapiens OX=9606 GN=TPP2 PE=4 SV=1;tr|Q5VZU9|Q5VZU9_HUMAN Isoform of P29144, Tripeptidyl-peptidase 2 OS=Homo sapiens OX=9606 GN=TPP2 PE=1 SV=1;sp|P29144|TPP2_HUMAN Tripeptidyl	4	5	5	5	4.9	4.9	4.9	130.29	1173	1173;1262;1249;1179	0	30.782	1.0193	1.3408	20.782	5	1	Leave out requantified	3128600	1537300	1591200	ACIDSNEDGDLSK;ANNIDYTVHSVR;FDVQSSLK;NGVAPGAQILSIK;NWVQTLRPVSAK				197	137;640;2490;6115;6426	True;True;True;True;True	145;683;2649;6588;6934	178;950;3769;9361;9911	274;275;276;1429;5787;5788;5789;14227;15097	275;1429;5787;14227;15097			9606;9606;9606;9606
DDX56	Probable ATP-dependent RNA helicase DDX56	1.3341	H7C3E9;Q9NY93-2;Q9NY93;G3V0G3;H7BZN7;F8WDT8	H7C3E9;Q9NY93-2;Q9NY93;G3V0G3	3;3;3;2;1;1	3;3;3;2;1;1	3;3;3;2;1;1	tr|H7C3E9|H7C3E9_HUMAN Isoform of Q9NY93, Probable ATP-dependent RNA helicase DDX56 (Fragment) OS=Homo sapiens OX=9606 GN=DDX56 PE=1 SV=1;sp|Q9NY93-2|DDX56-2_HUMAN Isoform of Q9NY93, Isoform 2 of Probable ATP-dependent RNA helicase DDX56 OS=Homo sapiens OX	6	3	3	3	8.6	8.6	8.6	44.046	396	396;507;547;375;182;185	0	17.471	0.97591	1.3341	5.9346	2	0	Median	605090	305460	299630	GPILLPYQFR;SLLFVNTLER;VANVSAAEDSVSQR				580	3204;7303;8388	True;True;True	3401;7859;9013	4810;11243;12923	7384;7385;17074;17075;19663	7385;17074;19663			9606;9606;9606;9606;9606;9606
FBXL6	F-box/LRR-repeat protein 6	1.3254	Q8N531-2;Q8N531	Q8N531-2;Q8N531	2;2	2;2	2;2	sp|Q8N531-2|FBXL6-2_HUMAN Isoform of Q8N531, Isoform 2 of F-box/LRR-repeat protein 6 OS=Homo sapiens OX=9606 GN=FBXL6 PE=2 SV=1;sp|Q8N531|FBXL6_HUMAN F-box/LRR-repeat protein 6 OS=Homo sapiens OX=9606 GN=FBXL6 PE=2 SV=1	2	2	2	2	4.9	4.9	4.9	57.914	533	533;539	0	14.832	1.005	1.3254	15.839	2	0	Median	781220	408890	372340	ELDLSGQGFSEK;NSIPLQLPVEALQK				1394	1995;6347	True;True	2127;6846	3049;9786	4673;4674;14899;14900;14901	4674;14901			9606;9606
TAF4	Transcription initiation factor TFIID subunit 4	1.315	V9GY14;A0A0G2JRY5;O00268	V9GY14;A0A0G2JRY5;O00268	2;2;2	2;2;2	2;2;2	tr|V9GY14|V9GY14_HUMAN Isoform of O00268, Transcription initiation factor TFIID subunit 4 (Fragment) OS=Homo sapiens OX=9606 GN=TAF4 PE=1 SV=1;tr|A0A0G2JRY5|A0A0G2JRY5_HUMAN Isoform of O00268, Transcription initiation factor TFIID subunit 4 (Fragment) OS=H	3	2	2	2	13	13	13	22.738	215	215;457;1085	0	14.019	0.96145	1.315	13.495	2	0	Median	916130	491910	424220	ALSAVSAQAAAAQK;ILATNSELVGTLTR				122	563;3910	True;True	598;4139	832;5917	1251;9086;9087	1251;9087			9606;9606;9606
EED	Polycomb protein EED	1.3091	O75530-3;O75530;O75530-2;E9PJK2	O75530-3;O75530;O75530-2;E9PJK2	2;2;2;1	2;2;2;1	2;2;2;1	sp|O75530-3|EED-3_HUMAN Isoform of O75530, Isoform 3 of Polycomb protein EED OS=Homo sapiens OX=9606 GN=EED PE=1 SV=2;sp|O75530|EED_HUMAN Polycomb protein EED OS=Homo sapiens OX=9606 GN=EED PE=1 SV=2;sp|O75530-2|EED-2_HUMAN Isoform of O75530, Isoform 2 of	4	2	2	2	4.8	4.8	4.8	45.524	400	400;441;466;361	0	11.77	0.99732	1.3091	26.696	2	0	Median	1109200	493250	615980	DPNLLLSVSK;ESYDYNPNK				737	1362;2282	True;True	1459;2426	2077;3455	3146;5306	3146;5306			9606;9606;9606;9606
ADA	Adenosine deaminase	1.3059	F5GWI4;P00813;F5GYD4;F5GXW0	F5GWI4;P00813	3;3;1;1	3;3;1;1	3;3;1;1	tr|F5GWI4|F5GWI4_HUMAN Isoform of P00813, Adenosine deaminase OS=Homo sapiens OX=9606 GN=ADA PE=1 SV=1;sp|P00813|ADA_HUMAN Adenosine deaminase OS=Homo sapiens OX=9606 GN=ADA PE=1 SV=3	4	3	3	3	9.4	9.4	9.4	38.292	339	339;363;75;263	0	17.282	1.2238	1.3059	51.257	3	1	Plateau	1482900	570850	912100	AQTPAFDKPK;DMGFTEEEFKR;STLDTDYQMTK				448	732;1325;7568	True;True;True	778;1414;8146	1095;2005;11636	1647;3031;17712	1647;3031;17712	257	291	9606;9606;9606;9606
IK	Protein Red	1.3019	Q13123;D6REL4;E7EQZ7;D6RCQ4;D6RAY9	Q13123;D6REL4;E7EQZ7	5;3;3;1;1	5;3;3;1;1	5;3;3;1;1	sp|Q13123|RED_HUMAN Protein Red OS=Homo sapiens OX=9606 GN=IK PE=1 SV=3;tr|D6REL4|D6REL4_HUMAN Isoform of Q13123, Protein Red (Fragment) OS=Homo sapiens OX=9606 GN=IK PE=1 SV=6;tr|E7EQZ7|E7EQZ7_HUMAN Isoform of Q13123, Protein Red (Fragment) OS=Homo sapien	5	5	5	5	9.2	9.2	9.2	65.601	557	557;212;267;107;140	0	29.49	1.0345	1.3019	22.755	6	0	Leave out requantified	3700800	1859400	1841400	EKEEEELMEKPQK;EYNEDEDPAAR;GLDFALLQK;LTQILSYLR;MEADGVEVK				1193	1966;2424;3096;5556;5762	True;True;True;True;True	2097;2579;3289;5893;6126	2994;3679;4667;8390;8391;8705	4578;5646;7164;12771;12772;12773;13261	4578;5646;7164;12773;13261			9606;9606;9606;9606;9606
H2AFV;H2AFZ	Histone H2A.V;Histone H2A.Z;Histone H2A	1.3003	Q71UI9;P0C0S5;C9J0D1;A0A494C189;Q71UI9-3;Q71UI9-4;Q71UI9-2;C9J386	Q71UI9;P0C0S5;C9J0D1;A0A494C189;Q71UI9-3;Q71UI9-4;Q71UI9-2;C9J386	4;4;3;3;3;3;3;2	4;4;3;3;3;3;3;2	2;2;1;1;2;2;1;1	sp|Q71UI9|H2AV_HUMAN Histone H2A.V OS=Homo sapiens OX=9606 GN=H2AFV PE=1 SV=3;sp|P0C0S5|H2AZ_HUMAN Histone H2A.Z OS=Homo sapiens OX=9606 GN=H2AFZ PE=1 SV=2;tr|C9J0D1|C9J0D1_HUMAN Isoform of Q71UI9, Histone H2A OS=Homo sapiens OX=9606 GN=H2AFV PE=1 SV=1;tr|	8	4	4	2	31.2	31.2	18.8	13.509	128	128;128;122;127;90;102;114;76	0	25.02	1.2878	1.3003	7.9877	4	0	Leave out requantified	259040000	112010000	147030000	AGLQFPVGR;ATIAGGGVIPHIHK;GDEELDSLIK;HLQLAIR				824	332;851;2865;3520	True;True;True;True	349;906;3048;3730	478;1263;4315;5311	717;718;719;720;721;1891;6632;6633;6634;8148	721;1891;6632;8148			9606;9606;9606;9606;9606;9606;9606;9606
TOP2A	DNA topoisomerase 2-alpha	1.2983	P11388;P11388-2;P11388-3;P11388-4	P11388;P11388-2;P11388-3;P11388-4	9;9;9;9	9;9;9;9	4;4;4;4	sp|P11388|TOP2A_HUMAN DNA topoisomerase 2-alpha OS=Homo sapiens OX=9606 GN=TOP2A PE=1 SV=3;sp|P11388-2|TOP2A-2_HUMAN Isoform of P11388, Isoform 2 of DNA topoisomerase 2-alpha OS=Homo sapiens OX=9606 GN=TOP2A PE=1 SV=3;sp|P11388-3|TOP2A-3_HUMAN Isoform of P	4	9	9	4	6.7	6.7	2.9	174.38	1531	1531;1557;1567;1612	0	61.238	0.94744	1.2983	9.8269	9	0	Leave out requantified	8022200	4142100	3880100	ELILFSNSDNER;ENMTLQPK;EVTFVPGLYK;FLEEFITPIVK;HVDYVADQIVTK;IFDEILVNAADNK;IMIMTDQDQDGSHIK;SVVSDLEADDVK;TPPLITDYR				836	2044;2158;2399;2585;3574;3752;4010;7650;8111	True;True;True;True;True;True;True;True;True	2179;2299;2554;2750;3787;3974;4249;8230;8721	3113;3114;3271;3646;3904;5399;5662;6065;11748;12506	4776;4777;4778;5038;5600;6001;8289;8290;8291;8702;8703;8704;9327;17869;19018;19019	4777;5038;5600;6001;8291;8702;9327;17869;19018	246	381	9606;9606;9606;9606
TOP1	DNA topoisomerase 1	1.2981	P11387	P11387	14	14	12	sp|P11387|TOP1_HUMAN DNA topoisomerase 1 OS=Homo sapiens OX=9606 GN=TOP1 PE=1 SV=2	1	14	14	12	21	21	18.7	90.725	765	765	0	93.025	1.0478	1.2981	28.318	20	2	Leave out requantified	30836000	15611000	15225000	AEEVATFFAK;AGNEKEEGETADTVGCCSLR;AVALYFIDK;ELTAPDENIPAK;GPVFAPPYEPLPENVK;HLQDLMEGLTAK;LEVQATDREENK;LNTGILNK;NIITNLSK;NLQLFMENK;QIALGTSK;SGDHLHNDSQIEADFR;SMMNLQTK;TYNASITLQQQLK				835	213;337;888;2097;3223;3517;4755;5267;6136;6219;6658;7141;7355;8327	True;True;True;True;True;True;True;True;True;True;True;True;True;True	225;354;944;2234;3422;3727;5045;5594;6611;6698;7182;7687;7916;8949	301;302;483;1319;3192;4847;4848;5307;5308;7212;7213;7214;7998;7999;9398;9527;10256;10960;11322;12834	450;451;452;727;728;1975;4905;4906;7451;7452;7453;7454;8142;8143;8144;8145;11028;11029;11030;12182;12183;12184;14294;14295;14482;15633;16676;17192;19524;19525	451;728;1975;4906;7453;8143;11029;12183;14295;14482;15633;16676;17192;19524	220	555	9606
EIF3J	Eukaryotic translation initiation factor 3 subunit J	1.2965	O75822-3;O75822;O75822-2;H0YGJ7;H0YLP3	O75822-3;O75822;O75822-2	6;6;5;2;2	6;6;5;2;2	6;6;5;2;2	sp|O75822-3|EIF3J-3_HUMAN Isoform of O75822, Isoform 3 of Eukaryotic translation initiation factor 3 subunit J OS=Homo sapiens OX=9606 GN=EIF3J PE=1 SV=2;sp|O75822|EIF3J_HUMAN Eukaryotic translation initiation factor 3 subunit J OS=Homo sapiens OX=9606 GN=	5	6	6	6	21.5	21.5	21.5	23.026	209	209;258;204;106;117	0	50.411	1.0841	1.2965	4.5964	16	2	Leave out requantified	28540000	13817000	14723000	DDFTEFGK;ITNSLTVLCSEK;KLQEESDLELAK;LQEESDLELAK;VLTPEEQLADK;VLTPEEQLADKLR				742	1088;4196;4397;5328;8843;8844	True;True;True;True;True;True	1160;4452;4668;5656;9493;9494	1661;1662;1663;6342;6343;6344;6665;6666;8079;8080;8081;13637;13638;13639;13640;13641	2515;2516;2517;2518;9746;9747;9748;9749;9750;9751;9752;9753;10225;10226;12312;12313;12314;12315;12316;12317;20791;20792;20793;20794;20795;20796;20797;20798;20799;20800;20801;20802	2517;9751;10225;12315;20793;20801			9606;9606;9606;9606;9606
TOP2B	DNA topoisomerase 2;DNA topoisomerase 2-beta	1.2878	E9PCY5;Q02880-2;Q02880;J3KTB7	E9PCY5;Q02880-2;Q02880	9;9;9;2	4;4;4;0	4;4;4;0	tr|E9PCY5|E9PCY5_HUMAN Isoform of Q02880, DNA topoisomerase 2 (Fragment) OS=Homo sapiens OX=9606 GN=TOP2B PE=1 SV=1;sp|Q02880-2|TOP2B-2_HUMAN Isoform of Q02880, Isoform Beta-1 of DNA topoisomerase 2-beta OS=Homo sapiens OX=9606 GN=TOP2B PE=1 SV=3;sp|Q02880	4	9	4	4	9.1	4.1	4.1	130.48	1150	1150;1621;1626;147	0	26.192	0.94992	1.2878	6.2157	4	0	Leave out requantified	1963700	1005200	958490	ELILFSNSDNER;ENMTLQPK;EVTFVPGLYK;HVDYVVDQVVGK;IFDEILVNAADNK;IMIMTDQDQDGSHIK;LLFPAVDDNLLK;NTVEITELPVR;SLAVSGLGVIGR				398	2044;2158;2399;3575;3752;4010;5078;6388;7252	False;False;False;True;False;False;True;True;True	2179;2299;2554;3788;3974;4249;5387;6896;7806	3113;3114;3271;3646;5400;5662;6065;7713;9856;11163	4776;4777;4778;5038;5600;8292;8293;8702;8703;8704;9327;11763;11764;15012;15013;15014;15015;16963;16964	4777;5038;5600;8292;8702;9327;11763;15014;16963	246	397	9606;9606;9606;9606
HSPA8	Heat shock cognate 71 kDa protein	1.2771	P11142;E9PKE3;P11142-2;E9PN89;E9PNE6;E9PLF4;E9PQQ4;E9PQK7;E9PK54;E9PPY6;E9PI65;P54652;E9PN25;E9PM13;E9PS65	P11142;E9PKE3;P11142-2;E9PN89;E9PNE6	25;24;21;18;16;12;11;11;11;9;8;8;7;5;5	25;24;21;18;16;12;11;11;11;9;8;8;7;5;5	12;11;12;11;5;10;10;10;10;8;6;2;6;0;0	sp|P11142|HSP7C_HUMAN Heat shock cognate 71 kDa protein OS=Homo sapiens OX=9606 GN=HSPA8 PE=1 SV=1;tr|E9PKE3|E9PKE3_HUMAN Isoform of P11142, Heat shock cognate 71 kDa protein OS=Homo sapiens OX=9606 GN=HSPA8 PE=1 SV=1;sp|P11142-2|HSP7C-2_HUMAN Isoform of P	15	25	25	12	37.9	37.9	20	70.897	646	646;627;493;312;500;187;171;178;183;137;168;639;132;150;223	0	297.84	1.1213	1.2771	12.187	78	6	Leave out requantified	756840000	349700000	407140000	ARFEELNADLFR;DAGTIAGLNVLR;DNNLLGK;EIAEAYLGK;FDDAVVQSDMK;FEELNADLFR;FELTGIPPAPR;GTLDPVEK;HWPFMVVNDAGR;HWPFMVVNDAGRPK;IINEPTAAAIAYGLDK;IINEPTAAAIAYGLDKK;LLQDFFNGK;MKEIAEAYLGK;MVNHFIAEFK;MVQEAEK;NQTAEKEEFEHQQK;NQVAMNPTNTVFDAK;NSLESYAFNMK;RFDDAVVQSDMK;SFYPEEVSSMVLTK;SQIHDIVLVGGSTR;STAGDTHLGGEDFDNR;TTPSYVAFTDTER;TVTNAVVTVPAYFNDSQR				832	744;1051;1342;1903;2470;2498;2508;3315;3588;3589;3874;3875;5136;5846;5976;5978;6325;6327;6350;6855;7130;7450;7545;8227;8304	True;True;True;True;True;True;True;True;True;True;True;True;True;True;True;True;True;True;True;True;True;True;True;True;True	790;1118;1435;2031;2626;2627;2657;2668;3517;3801;3802;4100;4101;5445;6255;6438;6439;6443;6820;6822;6823;6849;6850;7383;7384;7674;7675;8023;8123;8842;8925	1113;1591;1592;1593;1594;1595;1596;2045;2046;2900;2901;2902;2903;3738;3739;3740;3778;3779;3780;3800;3801;5001;5418;5419;5844;5845;5846;5847;5848;5849;5850;7792;7793;8885;8886;9127;9128;9129;9130;9131;9132;9140;9742;9743;9744;9748;9749;9750;9751;9752;9753;9754;9755;9789;9790;9791;9792;10546;10547;10548;10549;10941;10942;10943;10944;11459;11460;11461;11462;11602;11603;11604;12677;12678;12679;12680;…	1668;1669;2405;2406;2407;2408;2409;2410;2411;2412;2413;2414;2415;2416;3091;3092;3093;4438;4439;4440;4441;4442;5732;5733;5734;5735;5736;5737;5805;5806;5807;5808;5809;5810;5811;5839;5840;7678;8318;8319;8982;8983;8984;8985;8986;8987;8988;8989;8990;8991;11882;11883;11884;11885;13525;13526;13527;13528;13851;13852;13853;13854;13855;13856;13857;13858;13877;13878;13879;14830;14831;14832;14833;14840;14841…	1668;2408;3091;4438;5736;5811;5839;7678;8318;8319;8985;8989;11883;13528;13858;13878;14833;14851;14909;16053;16643;17433;17661;19287;19478	152;153;510;511;512;513	61;87;122;127;237;549	9606;9606;9606;9606;9606;9606;9606;9606;9606;9606;9606;9606;9606;9606;9606
HSPB1	Heat shock protein beta-1	1.2758	P04792;F8WE04;C9J3N8	P04792	11;5;3	11;5;3	11;5;3	sp|P04792|HSPB1_HUMAN Heat shock protein beta-1 OS=Homo sapiens OX=9606 GN=HSPB1 PE=1 SV=2	3	11	11	11	57.1	57.1	57.1	22.782	205	205;186;37	0	95.986	1.0836	1.2758	9.1416	17	1	Leave out requantified	57167000	26692000	30475000	AQLGGPEAAK;AQLGGPEAAKSDETAAK;DGVVEITGK;GPSWDPFR;LATQSNEITIPVTFESR;LFDQAFGLPR;PLPPAAIESPAVAAPAYSR;QDEHGYISR;QLSSGVSEIR;TKDGVVEITGK;VSLDVNHFAPDELTVK				792	713;714;1184;3219;4591;4763;6504;6585;6721;7958;9029	True;True;True;True;True;True;True;True;True;True;True	759;760;1263;3418;4873;5055;7013;7103;7247;8558;9695	1075;1076;1077;1799;1800;4842;6969;6970;6971;7232;10022;10147;10349;10350;12248;12249;12250;13901;13902;13903;13904	1614;1615;1616;2718;2719;7445;10676;10677;10678;10679;10680;10681;11056;11057;15286;15483;15769;15770;15771;18658;18659;18660;18661;21217;21218;21219;21220;21221;21222;21223	1614;1616;2719;7445;10680;11056;15286;15483;15769;18661;21221			9606;9606;9606
AQR	Intron-binding protein aquarius	1.2699	O60306;H0YH15;H0YLN9	O60306	17;5;1	17;5;1	16;5;1	sp|O60306|AQR_HUMAN RNA helicase aquarius OS=Homo sapiens OX=9606 GN=AQR PE=1 SV=4	3	17	17	16	12.7	12.7	12.2	171.29	1485	1485;646;180	0	104.98	0.95997	1.2699	17.681	16	1	Leave out requantified	15820000	7916600	7903500	AGMQPGLTMVVGPPGTGK;ASLCNLYNWR;AVLETIR;DADVEDEDTEEAK;DHIKDEWEGLR;FLSQLIQK;IFTQLEEFR;IMALDIDER;ISILTTYNGQK;LGHGEEELETEKDFSR;QDIEDSVSR;SVPLSEPVTMDK;TLIVEPHVIPNR;TLIVTHSNQALNQLFEK;VIEDIYEK;VNYVLAR;YSNMEQSLFTR				714	334;782;928;1036;1191;2623;3769;3996;4146;4861;6589;7631;8010;8011;8637;8917;9528	True;True;True;True;True;True;True;True;True;True;True;True;True;True;True;True;True	351;830;988;1102;1271;2790;3992;4229;4399;5159;7107;8210;8610;8611;9277;9576;10224	480;1161;1387;1560;1809;3971;5691;6041;6264;7369;10151;11719;12320;12321;13320;13749;14680	723;1738;2082;2357;2358;2359;2360;2730;6095;8747;9289;9290;9634;9635;11253;15487;17826;17827;18754;18755;18756;20319;20320;20993;22415	723;1738;2082;2358;2730;6095;8747;9289;9635;11253;15487;17827;18755;18756;20319;20993;22415	409	1115	9606;9606;9606
CKMT1A;CKMT1B	Creatine kinase U-type, mitochondrial	1.2654	P12532;P12532-2;F8WCN3;C9JSQ1;C9JJX8;C9J995;C9J8F6;C9JT96;P17540;C9J6W7	P12532;P12532-2;F8WCN3;C9JSQ1	11;8;7;6;3;3;3;2;2;1	11;8;7;6;3;3;3;2;2;1	11;8;7;6;3;3;3;2;2;1	sp|P12532|KCRU_HUMAN Creatine kinase U-type, mitochondrial OS=Homo sapiens OX=9606 GN=CKMT1B PE=1 SV=1;sp|P12532-2|KCRU-2_HUMAN Isoform of P12532, Isoform 2 of Creatine kinase U-type, mitochondrial OS=Homo sapiens OX=9606 GN=CKMT1B PE=1 SV=1;tr|F8WCN3|F8WC	10	11	11	11	23	23	23	47.036	417	417;448;298;241;103;129;148;221;419;203	0	89.272	1.0273	1.2654	12.016	15	1	Leave out requantified	99046000	47071000	51975000	GIWHNNEK;GLSLPPACTR;GTGGVDTAATGGVFDISNLDR;IPTPVIHTK;LGYILTCPSNLGTGLR;LYPPSAEYPDLR;LYPPSAEYPDLRK;RGTGGVDTAATGGVFDISNLDR;RLYPPSAEYPDLR;SGYFDER;VVVDALSGLK				842	3076;3144;3309;4064;4915;5696;5697;6869;6887;7186;9184	True;True;True;True;True;True;True;True;True;True;True	3269;3339;3511;4316;5215;6038;6039;7398;7416;7737;9858	4637;4732;4993;6157;7446;8594;8595;8596;8597;10575;10597;10598;11036;14124;14125	7126;7263;7264;7666;7667;9476;9477;9478;11379;11380;13080;13081;13082;13083;13084;13085;13086;13087;13088;16095;16096;16097;16124;16125;16126;16779;16780;21552;21553;21554;21555	7126;7264;7666;9478;11380;13087;13088;16097;16124;16780;21555			9606;9606;9606;9606;9606;9606;9606;9606;9606;9606
DNAJC7	DnaJ homolog subfamily C member 7	1.2647	Q99615-2;Q99615;K7EJE9;K7EK03;K7EJL5;K7EN19;K7EJV7;K7ER44;K7ELJ8;K7EPP7;K7ESP1;K7EIH8	Q99615-2;Q99615;K7EJE9;K7EK03;K7EJL5;K7EN19;K7EJV7;K7ER44;K7ELJ8;K7EPP7;K7ESP1;K7EIH8	2;2;1;1;1;1;1;1;1;1;1;1	2;2;1;1;1;1;1;1;1;1;1;1	2;2;1;1;1;1;1;1;1;1;1;1	sp|Q99615-2|DNJC7-2_HUMAN Isoform of Q99615, Isoform 2 of DnaJ homolog subfamily C member 7 OS=Homo sapiens OX=9606 GN=DNAJC7 PE=1 SV=2;sp|Q99615|DNJC7_HUMAN DnaJ homolog subfamily C member 7 OS=Homo sapiens OX=9606 GN=DNAJC7 PE=1 SV=2;tr|K7EJE9|K7EJE9_HUM	12	2	2	2	5.5	5.5	5.5	50.096	438	438;494;74;75;102;104;113;128;137;253;258;261	0	13.008	0.92784	1.2647	7.9334	2	0	Median	1305600	662160	643460	EALGDAQQSVR;EVGEAFTILSDPK				1505	1605;2360	True;True	1714;2510	2427;3594	3689;5527	3689;5527			9606;9606;9606;9606;9606;9606;9606;9606;9606;9606;9606;9606
HADHA	Trifunctional enzyme subunit alpha, mitochondrial;Long-chain enoyl-CoA hydratase;Long chain 3-hydroxyacyl-CoA dehydrogenase	1.2623	A0A2R8Y4F5;H0YFD6;P40939;A0A2R8YG21;A0A2R8Y688	A0A2R8Y4F5;H0YFD6;P40939	12;12;12;5;1	12;12;12;5;1	12;12;12;5;1	tr|A0A2R8Y4F5|A0A2R8Y4F5_HUMAN Isoform of P40939, Trifunctional enzyme subunit alpha, mitochondrial OS=Homo sapiens OX=9606 GN=HADHA PE=1 SV=1;tr|H0YFD6|H0YFD6_HUMAN Isoform of P40939, Trifunctional enzyme subunit alpha, mitochondrial OS=Homo sapiens OX=96	5	12	12	12	18.8	18.8	18.8	79.466	728	728;792;763;499;357	0	86.018	1.0109	1.2623	5.6276	15	5	Leave out requantified	14680000	7235700	7444200	ALMGLYHGQVLCK;ALTSFER;DTSASAVAVGLK;FGELVMTK;FGGGNPELLTQMVSK;FVDLYGAQK;GFYIYQEGVK;ILQEGVDPK;MQLLEIITTEK;TGIEQGSDAGYLCESQK;TLQEVTQLSQEAQR;VIGMHYFSPVDK				151	540;580;1465;2534;2541;2747;2965;3972;5932;7868;8032;8651	True;True;True;True;True;True;True;True;True;True;True;True	574;616;1568;2696;2703;2926;3151;4203;6382;6383;8463;8634;9291;9292	805;853;2222;3833;3841;4152;4153;4464;6004;9056;9057;12104;12356;12357;13337;13338	1210;1283;3374;3375;5890;5891;5903;5904;6376;6377;6863;9228;13761;13762;13763;13764;18417;18806;18807;20343;20344;20345;20346	1210;1283;3374;5891;5904;6376;6863;9228;13763;18417;18807;20345	122;123	462;471	9606;9606;9606;9606;9606
BPTF	Nucleosome-remodeling factor subunit BPTF	1.2604	F5GXF5;E7ETD6;E9PE19;A0A2R8Y7Q1;Q12830-4;Q12830-2;Q12830	F5GXF5;E7ETD6;E9PE19;A0A2R8Y7Q1;Q12830-4;Q12830-2;Q12830	2;2;2;2;2;2;2	2;2;2;2;2;2;2	2;2;2;2;2;2;2	tr|F5GXF5|F5GXF5_HUMAN Isoform of Q12830, Nucleosome-remodeling factor subunit BPTF (Fragment) OS=Homo sapiens OX=9606 GN=BPTF PE=1 SV=2;tr|E7ETD6|E7ETD6_HUMAN Isoform of Q12830, Nucleosome-remodeling factor subunit BPTF (Fragment) OS=Homo sapiens OX=9606	7	2	2	2	1.1	1.1	1.1	271.53	2457	2457;2764;2822;2965;2903;2920;3046	0	11.579	1.0674	1.2604	2.3789	2	0	Median	416560	218210	198350	GADQNEMDISK;LSTPSTGGSVDIISVK				162	2802;5484	True;True	2982;5816	4223;8285	6478;12614	6478;12614	138	1049	9606;9606;9606;9606;9606;9606;9606
BAZ2A	Bromodomain adjacent to zinc finger domain protein 2A	1.2603	J3KPG5;F8VU39;Q9UIF9-2;Q9UIF9-3;Q9UIF9;H0YII3;A0A0C4DGI9;H0YHQ7	J3KPG5;F8VU39;Q9UIF9-2;Q9UIF9-3;Q9UIF9	8;8;8;8;8;3;3;1	8;8;8;8;8;3;3;1	8;8;8;8;8;3;3;1	tr|J3KPG5|J3KPG5_HUMAN Isoform of Q9UIF9, Bromodomain adjacent to zinc finger domain protein 2A OS=Homo sapiens OX=9606 GN=BAZ2A PE=1 SV=1;tr|F8VU39|F8VU39_HUMAN Isoform of Q9UIF9, Bromodomain adjacent to zinc finger domain protein 2A OS=Homo sapiens OX=96	8	8	8	8	5.4	5.4	5.4	208.07	1875	1875;1903;1878;1901;1905;205;837;277	0	51.964	0.9328	1.2603	9.9381	12	0	Leave out requantified	7932700	4032100	3900600	ASPVTSPAAAFPTASPANK;EPLWPTHEVVLEK;GECQTTIQGQAR;KLEAQETLNEEDKAK;LAALEQNVER;MELAGSNTTASSPAR;MPVGDFFEER;VSEIPLTR				481	800;2176;2893;4383;4485;5782;5918;9014	True;True;True;True;True;True;True;True	849;2317;3076;4653;4762;6156;6357;6358;9679	1189;3292;4353;4354;6645;6646;6812;6813;8745;9019;9020;13878	1778;1779;1780;5070;6688;6689;6690;10198;10199;10423;10424;10425;10426;13319;13710;13711;13712;13713;21186	1778;5070;6689;10199;10425;13319;13711;21186	265;266	586;1143	9606;9606;9606;9606;9606;9606;9606;9606
STAU2	Double-stranded RNA-binding protein Staufen homolog 2	1.2588	Q9NUL3;E7EVJ4;Q9NUL3-4;Q9NUL3-2;Q9NUL3-7;Q9NUL3-3;Q9NUL3-6;Q9NUL3-8;G5EA18;E5RJN7;E9PH62;A0A0A0MTC4;A0A0A0MTD1;F8VPI7;E7EPX0;A0A0A0MTC6;E7EVI1;H0YBY0;E5RJ67	Q9NUL3;E7EVJ4;Q9NUL3-4;Q9NUL3-2;Q9NUL3-7;Q9NUL3-3;Q9NUL3-6;Q9NUL3-8;G5EA18;E5RJN7;E9PH62;A0A0A0MTC4;A0A0A0MTD1;F8VPI7;E7EPX0;A0A0A0MTC6;E7EVI1	3;3;3;3;3;3;3;3;3;3;3;3;3;3;3;3;2;1;1	2;2;2;2;2;2;2;2;2;2;2;2;2;2;2;2;1;1;1	2;2;2;2;2;2;2;2;2;2;2;2;2;2;2;2;1;1;1	sp|Q9NUL3|STAU2_HUMAN Double-stranded RNA-binding protein Staufen homolog 2 OS=Homo sapiens OX=9606 GN=STAU2 PE=1 SV=2;tr|E7EVJ4|E7EVJ4_HUMAN Isoform of Q9NUL3, Double-stranded RNA-binding protein Staufen homolog 2 OS=Homo sapiens OX=9606 GN=STAU2 PE=1 SV=	19	3	2	2	5.4	4	4	62.608	570	570;511;291;538;504;479;398;473;291;320;538;398;473;479;491;504;390;162;135	0	12.612	0.95575	1.2588	12.664	3	0	Median	1131000	598260	532730	AATTVLQELK;LAQIQQAK;VISGTTLGYLSPK				84	123;4569;8685	True;False;True	131;4848;9327	160;161;6926;6927;13387	248;249;10603;10604;10605;10606;20419;20420	248;10603;20420			9606;9606;9606;9606;9606;9606;9606;9606;9606;9606;9606;9606;9606;9606;9606;9606;9606;9606;9606
PRRC2A	Protein PRRC2A	1.256	P48634-2;P48634-3;P48634;P48634-4	P48634-2;P48634-3;P48634;P48634-4	8;8;8;6	8;8;8;6	8;8;8;6	sp|P48634-2|PRC2A-2_HUMAN Isoform of P48634, Isoform 2 of Protein PRRC2A OS=Homo sapiens OX=9606 GN=PRRC2A PE=1 SV=3;sp|P48634-3|PRC2A-3_HUMAN Isoform of P48634, Isoform 3 of Protein PRRC2A OS=Homo sapiens OX=9606 GN=PRRC2A PE=1 SV=3;sp|P48634|PRC2A_HUMAN	4	8	8	8	4.6	4.6	4.6	227.84	2144	2144;2156;2157;1533	0	54.168	0.96198	1.256	20.055	9	0	Leave out requantified	3486600	1704200	1782400	EEFPTLQAAGDQDK;GPDELEGPDSK;GVGSGGQGPPPPR;LIPGPLSPVAR;RMQEERRAACAEK;SDSGGSSSEPFDR;SLEIQKPAVAPR;YSSLNLFDTYK				1003	1750;3192;3351;4968;6891;7031;7267;9535	True;True;True;True;True;True;True;True	1869;3389;3556;5273;7422;7570;7822;10231	2682;4797;5054;5055;5056;7529;10606;10809;11188;14689	4096;4097;4098;7362;7363;7757;7758;7759;7760;11508;16136;16443;16444;16996;22433;22434;22435	4098;7363;7759;11508;16136;16444;16996;22435			9606;9606;9606;9606
BYSL	Bystin	1.2554	Q13895;H7BY94;F8WBL2	Q13895	5;2;1	5;2;1	5;2;1	sp|Q13895|BYST_HUMAN Bystin OS=Homo sapiens OX=9606 GN=BYSL PE=1 SV=3	3	5	5	5	12.4	12.4	12.4	49.601	437	437;183;194	0	40.902	0.95965	1.2554	4.621	7	2	Leave out requantified	11704000	6143000	5561300	EAIIVGSIITK;FYNLVLLPR;GTGEAEEEYVGPR;LQPHPQLSPEIR;TLADIIMEK				1222	1599;2785;3308;5367;7974	True;True;True;True;True	1708;2965;3510;5697;8574	2421;4200;4201;4990;4991;4992;8140;8141;12275	3680;3681;6443;6444;6445;6446;7662;7663;7664;7665;12410;12411;18696;18697	3681;6443;7662;12410;18696			9606;9606;9606
MOV10	Putative helicase MOV-10	1.2505	Q5JR04;Q9HCE1;Q9HCE1-2	Q5JR04;Q9HCE1;Q9HCE1-2	9;9;8	9;9;8	9;9;8	tr|Q5JR04|Q5JR04_HUMAN Isoform of Q9HCE1, Helicase MOV-10 OS=Homo sapiens OX=9606 GN=MOV10 PE=1 SV=1;sp|Q9HCE1|MOV10_HUMAN Helicase MOV-10 OS=Homo sapiens OX=9606 GN=MOV10 PE=1 SV=2;sp|Q9HCE1-2|MOV10-2_HUMAN Isoform of Q9HCE1, Isoform 2 of Helicase MOV-10	3	9	9	9	11.5	11.5	11.5	107.21	947	947;1003;900	0	55.591	0.91718	1.2505	12.544	9	1	Leave out requantified	7891400	4107600	3783900	ETGDPGGQLVLAGDPR;ITGNPVVTNR;LLLAPSSK;LLTLEVPGVTESR;NGGTQSVTLTHLFPLCR;SLESNPEQLQAMR;TVTLVEAIK;VGSVEEFQGQER;VLITTLITAGR				1301	2297;4186;5096;5169;6109;7273;8303;8615;8789	True;True;True;True;True;True;True;True;True	2441;4441;5405;5483;6582;7828;8924;9253;9435	3475;6328;7734;7837;9352;11195;12798;13288;13558	5337;5338;9725;9726;11793;11953;11954;14215;17007;19473;20270;20666;20667	5338;9725;11793;11954;14215;17007;19473;20270;20666	987	451	9606;9606;9606
SMARCA5	SWI/SNF-related matrix-associated actin-dependent regulator of chromatin subfamily A member 5	1.2479	O60264	O60264	27	27	18	sp|O60264|SMCA5_HUMAN SWI/SNF-related matrix-associated actin-dependent regulator of chromatin subfamily A member 5 OS=Homo sapiens OX=9606 GN=SMARCA5 PE=1 SV=1	1	27	27	18	25.5	25.5	18.2	121.9	1052	1052	0	189.28	1.0049	1.2479	11.534	28	2	Leave out requantified	54189000	26610000	27579000	CNTLITLIER;DDIENIAR;DFNQFIK;EIQEPDPTYEEK;ENMELEEK;ESEITDEDIDGILER;FITDNTVEER;IDEAESLNDEELEEKEK;IMAQIER;IYVGLSK;KANYAVDAYFR;LDGQTPHDER;LDSIVIQQGR;LFELLEK;LGFDKENVYDELR;LLNILMQLR;LLTQGFTNWNK;LVDQNLNK;NPELPNAAQAQK;NPELPNAAQAQKEEQLK;NYTEEEDR;QDSINAYNEPNSTK;RTEQEEDEELLTESSK;TLQTISLLGYMK;VLIFSQMTR;WGRDDIENIAR;YLVIDEAHR				713	1022;1090;1144;1948;2156;2251;2574;3660;3997;4287;4300;4626;4652;4770;4846;5120;5173;5580;6286;6287;6447;6595;6911;8039;8782;9248;9461	True;True;True;True;True;True;True;True;True;True;True;True;True;True;True;True;True;True;True;True;True;True;True;True;True;True;True	1088;1162;1218;2078;2297;2393;2739;3877;4230;4548;4562;4909;4936;5062;5144;5429;5487;5917;6777;6778;6955;7115;7444;8642;8643;9428;9924;10149	1542;1665;1742;2969;3269;3409;3885;5518;6042;6486;6514;7017;7046;7243;7349;7771;7772;7841;8433;9670;9671;9946;10160;10646;12367;12368;12369;13549;14239;14573	2318;2319;2520;2521;2633;4542;4543;5033;5034;5239;5240;5241;5242;5970;5971;8474;8475;9291;9292;9982;9983;10026;10748;10749;10788;10789;11075;11226;11849;11850;11960;11961;11962;12833;12834;14706;14707;14708;15154;15500;15501;15502;16198;18821;18822;18823;18824;20651;21721;21722;22251;22252;22253;22254	2319;2520;2633;4543;5033;5241;5971;8474;9291;9982;10026;10749;10788;11075;11226;11849;11962;12833;14707;14708;15154;15500;16198;18822;20651;21721;22254	179;408	222;451	9606
TRIP12	E3 ubiquitin-protein ligase TRIP12	1.2449	Q14669;Q14669-2;Q14669-3;Q14669-4;C9JLJ5;C9JSX9;H7C2Y1;C9JLD7;G5E9G6	Q14669;Q14669-2;Q14669-3;Q14669-4	6;6;6;5;1;1;1;1;1	6;6;6;5;1;1;1;1;1	6;6;6;5;1;1;1;1;1	sp|Q14669|TRIPC_HUMAN E3 ubiquitin-protein ligase TRIP12 OS=Homo sapiens OX=9606 GN=TRIP12 PE=1 SV=1;sp|Q14669-2|TRIPC-2_HUMAN Isoform of Q14669, Isoform 2 of E3 ubiquitin-protein ligase TRIP12 OS=Homo sapiens OX=9606 GN=TRIP12 PE=1 SV=1;sp|Q14669-3|TRIPC-	9	6	6	6	3.9	3.9	3.9	220.43	1992	1992;2025;2040;1722;149;154;187;190;430	0	40.436	0.97463	1.2449	19.059	8	0	Leave out requantified	2667600	1307500	1360100	EIIPTSEFINSK;HLDQEQQLK;LFLQFVTGSPR;LLDTNPEINQSDSQDSR;LSTQSNSNNIEPAR;SSAVVVDAIPVFLEK				1236	1934;3507;4787;5039;5485;7486	True;True;True;True;True;True	2064;3717;5082;5348;5817;8062	2949;2950;5293;7265;7650;7651;8286;11522	4508;4509;4510;4511;4512;8121;8122;11104;11105;11677;11678;11679;11680;12615;17522;17523;17524	4509;8121;11104;11680;12615;17524			9606;9606;9606;9606;9606;9606;9606;9606;9606
RFC2	Replication factor C subunit 2	1.241	P35250;P35250-2;H7C5P4;A0A087WVY3;H7C5S7;H7C5P1;H7C5Q7;F8WC37;H7C5A0;H7C5G4	P35250;P35250-2;H7C5P4;A0A087WVY3	6;5;3;3;1;1;1;1;1;1	6;5;3;3;1;1;1;1;1;1	6;5;3;3;1;1;1;1;1;1	sp|P35250|RFC2_HUMAN Replication factor C subunit 2 OS=Homo sapiens OX=9606 GN=RFC2 PE=1 SV=3;sp|P35250-2|RFC2-2_HUMAN Isoform of P35250, Isoform 2 of Replication factor C subunit 2 OS=Homo sapiens OX=9606 GN=RFC2 PE=1 SV=3;tr|H7C5P4|H7C5P4_HUMAN Isoform o	10	6	6	6	16.9	16.9	16.9	39.157	354	354;320;198;251;28;52;75;77;87;101	0	77.936	0.92716	1.241	9.9518	6	0	Leave out requantified	9732800	4819200	4913600	DAMLELNASNDR;IIEPIQSR;LNEIVGNEDTVSR;LTDAQILTR;TFQMAEYLK;TTSILCLAR				949	1063;3859;5233;5506;7839;8234	True;True;True;True;True;True	1131;1132;4085;5559;5838;8433;8850	1618;1619;5819;7947;8316;12067;12689	2449;2450;2451;2452;8947;8948;12102;12103;12104;12659;18361;19300;19301	2451;8947;12104;12659;18361;19301	605	102	9606;9606;9606;9606;9606;9606;9606;9606;9606;9606
WDR18	WD repeat-containing protein 18	1.2401	U3KQC1;A0A0A0MQU0;Q9BV38;K7EIR0;K7EML4;A0A087X237;K7EKX5	U3KQC1;A0A0A0MQU0;Q9BV38;K7EIR0	6;6;6;4;2;1;1	6;6;6;4;2;1;1	6;6;6;4;2;1;1	tr|U3KQC1|U3KQC1_HUMAN Isoform of Q9BV38, WD repeat-containing protein 18 (Fragment) OS=Homo sapiens OX=9606 GN=WDR18 PE=1 SV=1;tr|A0A0A0MQU0|A0A0A0MQU0_HUMAN Isoform of Q9BV38, WD repeat-containing protein 18 (Fragment) OS=Homo sapiens OX=9606 GN=WDR18 PE	7	6	6	6	16	16	16	43.237	394	394;429;432;409;268;144;152	0	38.241	0.98387	1.2401	10.839	6	1	Leave out requantified	6309300	3262500	3046800	DLFDFSTR;LGLHQQGSEPSYLDR;NYISAWELQR;SVLGGQDQLR;VATSSLDQTVK;VTELEDEVR				61	1268;4876;6434;7624;8413;9068	True;True;True;True;True;True	1352;5176;6942;8203;9039;9734	1924;7396;9921;11711;12963;13958	2903;11298;11299;15112;15113;15114;15115;17816;19738;21307;21308	2903;11298;15114;17816;19738;21307			9606;9606;9606;9606;9606;9606;9606
DHX57	Putative ATP-dependent RNA helicase DHX57	1.2381	Q6P158;A0A087WZ11;H7C109;Q6P158-2	Q6P158	3;1;1;1	2;1;1;1	2;1;1;1	sp|Q6P158|DHX57_HUMAN Putative ATP-dependent RNA helicase DHX57 OS=Homo sapiens OX=9606 GN=DHX57 PE=1 SV=2	4	3	2	2	2.3	1.5	1.5	155.6	1386	1386;472;665;658	0.00075245	11.165	0.90782	1.2381	5.2917	3	0	Plateau	965880	474460	491420	ETILNLLR;FVAASHQVAELVK;LLYCTTGVLLR				1327	2305;2743;5189	True;True;False	2449;2922;5503	3486;3487;4147;7862	5359;5360;6369;11986	5360;6369;11986			9606;9606;9606;9606
CHERP	Calcium homeostasis endoplasmic reticulum protein	1.2266	J3QK89;Q8IWX8	J3QK89;Q8IWX8	3;3	3;3	3;3	tr|J3QK89|J3QK89_HUMAN Isoform of Q8IWX8, Calcium homeostasis endoplasmic reticulum protein OS=Homo sapiens OX=9606 GN=CHERP PE=1 SV=1;sp|Q8IWX8|CHERP_HUMAN Calcium homeostasis endoplasmic reticulum protein OS=Homo sapiens OX=9606 GN=CHERP PE=1 SV=3	2	3	3	3	4.2	4.2	4.2	104.93	927	927;916	0	19.591	0.93845	1.2266	29.618	4	1	Leave out requantified	2185100	1125000	1060100	GVGVALDDPYENYR;LLQLWEK;QEQVTAAVAHAVEQQMQK				611	3352;5143;6615	True;True;True	3557;5452;7136	5057;7801;7802;7803;10187	7761;11900;11901;11902;15540	7761;11902;15540			9606;9606
NPM1	Nucleophosmin	1.2249	P06748-3;P06748-2;P06748;E5RGW4	P06748-3;P06748-2;P06748;E5RGW4	4;4;4;2	4;4;4;2	4;4;4;2	sp|P06748-3|NPM-3_HUMAN Isoform of P06748, Isoform 3 of Nucleophosmin OS=Homo sapiens OX=9606 GN=NPM1 PE=1 SV=2;sp|P06748-2|NPM-2_HUMAN Isoform of P06748, Isoform 2 of Nucleophosmin OS=Homo sapiens OX=9606 GN=NPM1 PE=1 SV=2;sp|P06748|NPM_HUMAN Nucleophosmi	4	4	4	4	14.7	14.7	14.7	28.4	259	259;265;294;59	0	27.571	1.0502	1.2249	7.566	17	1	Leave out requantified	95351000	46201000	49150000	GPSSVEDIK;MQASIEK;TVSLGAGAK;VDNDENEHQLSLR				803	3218;5920;8295;8457	True;True;True;True	3417;6360;8914;9086	4838;4839;4840;4841;9022;9023;12777;12778;13030;13031;13032;13033;13034;13035;13036;13037;13038	7435;7436;7437;7438;7439;7440;7441;7442;7443;7444;13716;13717;19443;19444;19843;19844;19845;19846;19847;19848;19849;19850;19851;19852;19853;19854;19855;19856;19857;19858;19859;19860;19861;19862;19863;19864	7439;13717;19443;19858			9606;9606;9606;9606
RBM12B	RNA-binding protein 12B	1.219	B9ZVT1;Q8IXT5	B9ZVT1;Q8IXT5	2;2	2;2	2;2	tr|B9ZVT1|B9ZVT1_HUMAN Isoform of Q8IXT5, RNA-binding protein 12B OS=Homo sapiens OX=9606 GN=RBM12B PE=1 SV=2;sp|Q8IXT5|RB12B_HUMAN RNA-binding protein 12B OS=Homo sapiens OX=9606 GN=RBM12B PE=1 SV=2	2	2	2	2	2.2	2.2	2.2	102.7	881	881;1001	0	12.977	0.8686	1.219	2.1814	2	0	Median	1328200	762030	566210	FLGTEVLLR;GTDLTDEQIR				273	2596;3298	True;True	2762;3500	3940;4976	6045;7641;7642	6045;7642			9606;9606
SSRP1	FACT complex subunit SSRP1	1.2172	Q08945;E9PMD4;A0A0U1RRK2;E9PPZ7	Q08945	14;3;3;1	14;3;3;1	14;3;3;1	sp|Q08945|SSRP1_HUMAN FACT complex subunit SSRP1 OS=Homo sapiens OX=9606 GN=SSRP1 PE=1 SV=1	4	14	14	14	24.1	24.1	24.1	81.074	709	709;173;225;89	0	101.91	0.94483	1.2172	20.459	24	3	Leave out requantified	54208000	27682000	26527000	ADVIQATGDAICIFR;ASSGLLYPLER;EFVSSDESSSGENK;EGMNPSYDEYADSDEDQHDAYLER;FDEISFVNFAR;GWNWGTVK;IPYTTVLR;ITVPGNFQGHSGAQCITCSYK;LFDFVNAK;NMSGSLYEMVSR;QGTQYTFSSIER;QGTQYTFSSIEREEYGK;SDHPGISITDLSK;SFDFEIETK				1174	187;804;1809;1859;2473;3396;4067;4209;4762;6254;6649;6650;7018;7109	True;True;True;True;True;True;True;True;True;True;True;True;True;True	198;853;1934;1987;2630;3601;4319;4466;5054;6741;6742;6743;7172;7173;7556;7653	258;1193;1194;2769;2839;3743;5118;6160;6363;7229;7230;7231;9607;9608;9609;9610;10242;10243;10244;10790;10791;10792;10914;10915	390;1785;1786;1787;1788;4224;4225;4342;4343;4344;5743;5744;7862;9482;9483;9786;11053;11054;11055;14593;14594;14595;14596;14597;14598;14599;15616;15617;15618;15619;15620;16410;16411;16412;16413;16414;16604;16605;16606	390;1787;4224;4343;5744;7862;9482;9786;11054;14594;15619;15620;16412;16606	846;847	306;313	9606;9606;9606;9606
ZNF638	Zinc finger protein 638	1.2153	Q14966-2;Q14966-6;Q14966-4;Q14966-3;Q14966	Q14966-2;Q14966-6;Q14966-4;Q14966-3;Q14966	2;2;2;2;2	2;2;2;2;2	2;2;2;2;2	sp|Q14966-2|ZN638-2_HUMAN Isoform of Q14966, Isoform 2 of Zinc finger protein 638 OS=Homo sapiens OX=9606 GN=ZNF638 PE=1 SV=2;sp|Q14966-6|ZN638-6_HUMAN Isoform of Q14966, Isoform 6 of Zinc finger protein 638 OS=Homo sapiens OX=9606 GN=ZNF638 PE=1 SV=2;sp|Q	5	2	2	2	3.8	3.8	3.8	92.051	814	814;918;1139;1957;1978	0	12.674	0.91074	1.2153	1.3722	2	0	Median	575350	252780	322570	ETLGSEAVSSNVIDYGHASK;NYQSQADIPIR				1244	2308;6443	True;True	2452;6951	3491;9936	5367;15143	5367;15143			9606;9606;9606;9606;9606
ISY1	Pre-mRNA-splicing factor ISY1 homolog	1.2126	Q9ULR0;Q9ULR0-2;Q9ULR0-1;D6RC18;A8MVI5	Q9ULR0;Q9ULR0-2;Q9ULR0-1;D6RC18;A8MVI5	2;2;2;1;1	2;2;2;1;1	2;2;2;1;1	sp|Q9ULR0|ISY1_HUMAN Pre-mRNA-splicing factor ISY1 homolog OS=Homo sapiens OX=9606 GN=ISY1 PE=1 SV=3;sp|Q9ULR0-2|ISY1-2_HUMAN Isoform of Q9ULR0, Isoform 1 of Pre-mRNA-splicing factor ISY1 homolog OS=Homo sapiens OX=9606 GN=ISY1 PE=1 SV=3;sp|Q9ULR0-1|ISY1-1	5	2	2	2	9.5	9.5	9.5	32.992	285	285;307;331;124;252	0	16.163	0.90101	1.2126	13.057	2	1	Median	1832700	924440	908250	VAQIQNAGLGEFR;YASETLQAQSEEAR				1657	8400;9291	True;True	9025;9970	12945;14300	19706;21829;21830;21831	19706;21831			9606;9606;9606;9606;9606
RFC5	Replication factor C subunit 5	1.2086	P40937-2;P40937;F5H5S0;E9PEP3;C9JH72	P40937-2;P40937	7;7;3;2;1	7;7;3;2;1	7;7;3;2;1	sp|P40937-2|RFC5-2_HUMAN Isoform of P40937, Isoform 2 of Replication factor C subunit 5 OS=Homo sapiens OX=9606 GN=RFC5 PE=1 SV=1;sp|P40937|RFC5_HUMAN Replication factor C subunit 5 OS=Homo sapiens OX=9606 GN=RFC5 PE=1 SV=1	5	7	7	7	23.2	23.2	23.2	36.104	319	319;340;104;99;104	0	46.449	0.96648	1.2086	7.1997	6	0	Leave out requantified	10552000	5974900	4577400	ALVTLSSGDMR;FCLICNYLSK;FGPLTPELMVPR;GPILSFASTR;LSVGTNEK;VDFPSSVR;VTEETVYTCTGHPLK				976	596;2464;2549;3205;5489;8448;9064	True;True;True;True;True;True;True	632;2620;2711;3402;5821;9077;9730	876;3730;3850;4811;8291;13013;13950	1322;5722;5920;7386;7387;7388;12621;19821;21295;21296	1322;5722;5920;7388;12621;19821;21296	646;647	161;192	9606;9606;9606;9606;9606
GRWD1	Glutamate-rich WD repeat-containing protein 1	1.2073	Q9BQ67;M0QX71	Q9BQ67;M0QX71	2;1	2;1	2;1	sp|Q9BQ67|GRWD1_HUMAN Glutamate-rich WD repeat-containing protein 1 OS=Homo sapiens OX=9606 GN=GRWD1 PE=1 SV=1;tr|M0QX71|M0QX71_HUMAN Isoform of Q9BQ67, Glutamate-rich WD repeat-containing protein 1 (Fragment) OS=Homo sapiens OX=9606 GN=GRWD1 PE=1 SV=1	2	2	2	2	5.2	5.2	5.2	49.419	446	446;228	0	12.829	0.86467	1.2073	48.819	2	0	Median	2116600	1118500	998030	AQTGAPCLSFDIVR;GQVEVFALR				1510	730;3250	True;True	776;3449	1093;4889;4890	1644;7515;7516;7517	1644;7516			9606;9606
KPNA2	Importin subunit alpha-1	1.2048	P52292;J3QLL0;J3KS65;J3QL07	P52292;J3QLL0;J3KS65	10;5;5;1	10;5;5;1	10;5;5;1	sp|P52292|IMA1_HUMAN Importin subunit alpha-1 OS=Homo sapiens OX=9606 GN=KPNA2 PE=1 SV=1;tr|J3QLL0|J3QLL0_HUMAN Isoform of P52292, Importin subunit alpha-1 (Fragment) OS=Homo sapiens OX=9606 GN=KPNA2 PE=1 SV=1;tr|J3KS65|J3KS65_HUMAN Isoform of P52292, Impo	4	10	10	10	22.9	22.9	22.9	57.861	529	529;134;143;50	0	154.93	0.91594	1.2048	10.03	13	3	Leave out requantified	41923000	21048000	20875000	ASLSLIEK;EATWTMSNITAGR;EKQPPIDNIIR;FVSFLGR;GINSSNVENQLQATQAAR;LLGASELPIVTPALR;NLTWTLSNLCR;NVSSFPDDATSPLQENR;STNENANTPAAR;TGVVPQLVK				1036	788;1660;1972;2767;3060;5081;6237;6419;7579;7894	True;True;True;True;True;True;True;True;True;True	836;1772;1773;2104;2946;3252;5390;6718;6927;8157;8491	1174;2516;2517;3007;3008;4176;4610;4611;7716;9557;9902;11652;12146	1754;1755;3841;3842;3843;4595;4596;6411;7079;7080;7081;7082;11769;11770;14530;14531;14532;15079;15080;15081;15082;15083;17732;17733;18485	1755;3843;4596;6411;7080;11769;14530;15080;17733;18485	702	359	9606;9606;9606;9606
HSPA5	78 kDa glucose-regulated protein	1.2039	P11021	P11021	25	24	24	sp|P11021|BIP_HUMAN Endoplasmic reticulum chaperone BiP OS=Homo sapiens OX=9606 GN=HSPA5 PE=1 SV=2	1	25	24	24	39.9	39.9	39.9	72.332	654	654	0	240.28	1.068	1.2039	10.159	43	0	Leave out requantified	231930000	107980000	123950000	AKFEELNMDLFR;DAGTIAGLNVMR;ELEEIVQPIISK;ETAEAYLGK;FEELNMDLFR;IINEPTAAAIAYGLDK;IINEPTAAAIAYGLDKR;ITITNDQNR;ITPSYVAFTPEGER;KSDIDEIVLVGGSTR;KSQIFSTASDNQPTVTIK;LSSEDKETMEK;LYGSAGPPPTGEEDTAEKDEL;MKETAEAYLGK;NELESYAYSLK;NQLTSNPENTVFDAK;SDIDEIVLVGGSTR;SQIFSTASDNQPTVTIK;TFAPEEISAMVLTK;TKPYIQVDIGGGQTK;TWNDPSVQQDIK;VLEDSDLK;VMEHFIK;VTHAVVTVPAYFNDAQR;VYEGERPLTK				830	449;1052;2011;2285;2499;3874;3876;4188;4200;4433;4439;5475;5687;5847;6071;6317;7019;7449;7825;7968;8316;8739;8863;9072;9214	True;True;True;True;True;False;True;True;True;True;True;True;True;True;True;True;True;True;True;True;True;True;True;True;True	472;1119;1120;2144;2429;2658;2659;4100;4102;4443;4456;4707;4714;5806;6029;6256;6257;6543;6812;7557;8022;8418;8419;8568;8938;9385;9515;9738;9888	664;665;1597;1598;3067;3068;3461;3781;3782;5844;5845;5846;5851;5852;6330;6331;6348;6349;6723;6724;6735;8272;8273;8582;8583;8887;8888;8889;9291;9730;9731;9732;9733;10793;11457;11458;12044;12045;12046;12264;12818;13478;13665;13962;13963;14170;14171;14172	1003;1004;2417;2418;2419;2420;4700;4701;4702;4703;5315;5812;5813;5814;8982;8983;8984;8985;8992;8993;8994;8995;9728;9729;9730;9759;9760;9761;9762;10301;10302;10303;10304;10322;12597;12598;13062;13063;13064;13065;13529;13530;13531;13532;14113;14114;14807;14808;14809;14810;14811;14812;14813;14814;14815;14816;16415;16416;17426;17427;17428;17429;18324;18325;18326;18327;18328;18329;18681;18682;19503;19…	1003;2419;4702;5315;5813;8985;8993;9730;9762;10304;10322;12598;13062;13531;14113;14816;16415;17429;18329;18682;19505;20550;20850;21313;21623	506;507;508;509	148;153;196;332	9606
PIP4K2A	Phosphatidylinositol 5-phosphate 4-kinase type-2 alpha	1.2026	P48426;P48426-2;H7BXS3	P48426;P48426-2	4;4;1	4;4;1	3;3;0	sp|P48426|PI42A_HUMAN Phosphatidylinositol 5-phosphate 4-kinase type-2 alpha OS=Homo sapiens OX=9606 GN=PIP4K2A PE=1 SV=2;sp|P48426-2|PI42A-2_HUMAN Isoform of P48426, Isoform 2 of Phosphatidylinositol 5-phosphate 4-kinase type-2 alpha OS=Homo sapiens OX=96	3	4	4	3	14	14	9.9	46.224	406	406;347;266	0	29.792	0.88257	1.2026	7.4977	4	0	Leave out requantified	3780400	2053000	1727400	FGIDDQDFQNSLTR;HGAGAEISTVNPEQYSK;SAPLPNDSQAR;TITSEDVAEMHNILK				1001	2545;3464;6974;7953	True;True;True;True	2707;3670;7511;8552	3846;5225;10734;12238	5912;5913;8026;16329;18641;18642	5912;8026;16329;18641			9606;9606;9606
SMU1	WD40 repeat-containing protein SMU1;WD40 repeat-containing protein SMU1, N-terminally processed	1.2011	Q2TAY7;Q2TAY7-2	Q2TAY7;Q2TAY7-2	8;5	8;5	8;5	sp|Q2TAY7|SMU1_HUMAN WD40 repeat-containing protein SMU1 OS=Homo sapiens OX=9606 GN=SMU1 PE=1 SV=2;sp|Q2TAY7-2|SMU1-2_HUMAN Isoform of Q2TAY7, Isoform 2 of WD40 repeat-containing protein SMU1 OS=Homo sapiens OX=9606 GN=SMU1 PE=1 SV=2	2	8	8	8	16.4	16.4	16.4	57.543	513	513;352	0	55.203	0.89557	1.2011	11.957	12	0	Leave out requantified	10800000	5530400	5269800	DTEMLATGAQDGK;DVEEEKFPTQLSR;EAYPDGSSK;GVTCLSFSK;IQSGQCLR;LIMQYLK;LMALLGQALK;SNTVVIMNMQGQIVR				1282	1450;1479;1675;3376;4106;4962;5197;7386	True;True;True;True;True;True;True;True	1552;1553;1582;1789;3581;4358;5266;5267;5511;5512;7952;7953	2199;2200;2245;2538;5089;6204;7522;7523;7874;7875;11364;11365	3335;3336;3337;3338;3339;3340;3403;3404;3870;7812;7813;9545;9546;11500;11501;12002;12003;12004;17263;17264;17265;17266;17267;17268;17269	3336;3403;3870;7812;9546;11500;12003;17267	977;978;979;980;981	15;162;278;425;427	9606;9606
RFC3	Replication factor C subunit 3	1.1991	P40938;P40938-2;A0A087X270	P40938;P40938-2	6;5;2	6;5;2	6;5;2	sp|P40938|RFC3_HUMAN Replication factor C subunit 3 OS=Homo sapiens OX=9606 GN=RFC3 PE=1 SV=2;sp|P40938-2|RFC3-2_HUMAN Isoform of P40938, Isoform 2 of Replication factor C subunit 3 OS=Homo sapiens OX=9606 GN=RFC3 PE=1 SV=2	3	6	6	6	17.7	17.7	17.7	40.556	356	356;305;103	0	48.379	0.9529	1.1991	6.8527	8	0	Leave out requantified	9701300	4811400	4890000	AIYHLEAFVAK;EGLNLPSQLAHR;ETANAIVSQQTPQR;TVAQSQQLETNSQR;VVLLTEVDK;VVLLTEVDKLTK				977	445;1851;2287;8248;9154;9155	True;True;True;True;True;True	468;1977;2431;8865;9827;9828	659;2827;3463;3464;12707;12708;14084;14085	997;998;4318;5318;5319;5320;5321;19325;19326;19327;19328;21491;21492;21493;21494	998;4318;5320;19328;21492;21494			9606;9606;9606
PPWD1	Peptidylprolyl isomerase domain and WD repeat-containing protein 1	1.1971	Q96BP3;D6RA12;D6RDA4;D6RB19;D6RHV0;F5H7P7;Q96BP3-2	Q96BP3;D6RA12;D6RDA4;D6RB19;D6RHV0;F5H7P7;Q96BP3-2	2;1;1;1;1;1;1	2;1;1;1;1;1;1	2;1;1;1;1;1;1	sp|Q96BP3|PPWD1_HUMAN Peptidylprolyl isomerase domain and WD repeat-containing protein 1 OS=Homo sapiens OX=9606 GN=PPWD1 PE=1 SV=1;tr|D6RA12|D6RA12_HUMAN Isoform of Q96BP3, Peptidylprolyl isomerase domain and WD repeat-containing protein 1 OS=Homo sapiens	7	2	2	2	3.9	3.9	3.9	73.574	646	646;68;84;107;108;616;490	0	12.161	0.95342	1.1971	11.301	2	0	Median	887750	453680	434060	VMQLALFQGIAK;WVGPLPVEATLAK				1462	8871;9268	True;True	9527;9945	13682;14268	20875;20876;21771	20875;21771	1062	401	9606;9606;9606;9606;9606;9606;9606
FAM98A	Protein FAM98A	1.1966	E9PH82;Q8NCA5-2;Q8NCA5	E9PH82;Q8NCA5-2;Q8NCA5	2;2;2	2;2;2	2;2;2	tr|E9PH82|E9PH82_HUMAN Isoform of Q8NCA5, Protein FAM98A OS=Homo sapiens OX=9606 GN=FAM98A PE=1 SV=1;sp|Q8NCA5-2|FA98A-2_HUMAN Isoform of Q8NCA5, Isoform 2 of Protein FAM98A OS=Homo sapiens OX=9606 GN=FAM98A PE=1 SV=1;sp|Q8NCA5|FA98A_HUMAN Protein FAM98A O	3	2	2	2	8.7	8.7	8.7	34.431	312	312;518;519	0	17.792	0.85824	1.1966	2.8278	4	1	Median	4376600	2321400	2055300	IEAINQAIANEYEVR;TTISVAHLLAAR				411	3696;8217	True;True	3915;8832	5571;5572;12663;12664	8550;8551;8552;19258;19259;19260;19261	8550;19260			9606;9606;9606
RBM4;RBM4B	RNA-binding protein 4;RNA-binding protein 4B	1.1959	Q9BWF3;E9PLB0;E9PM61;D6R9K7;U3KQD5;J3QRR5;E9PB51;Q9BWF3-3;Q9BWF3-4;Q9BWF3-2;Q9BQ04	Q9BWF3;E9PLB0;E9PM61;D6R9K7;U3KQD5;J3QRR5;E9PB51;Q9BWF3-3;Q9BWF3-4;Q9BWF3-2;Q9BQ04	7;6;6;6;6;6;6;6;6;6;6	7;6;6;6;6;6;6;6;6;6;6	6;6;6;6;6;6;6;6;6;6;6	sp|Q9BWF3|RBM4_HUMAN RNA-binding protein 4 OS=Homo sapiens OX=9606 GN=RBM4 PE=1 SV=1;tr|E9PLB0|E9PLB0_HUMAN Isoform of Q9BQ04, RNA-binding protein 4B OS=Homo sapiens OX=9606 GN=RBM4B PE=1 SV=1;tr|E9PM61|E9PM61_HUMAN Isoform of Q9BQ04, RNA-binding protein 4	11	7	7	6	19.8	19.8	15.4	40.313	364	364;143;147;150;151;155;240;143;173;177;359	0	52.608	0.924	1.1959	9.4544	6	0	Leave out requantified	4861500	2485000	2376500	AEDAVEAIR;DYAFVHMER;EATEQEIR;LHGVNINVEASK;NYGFVHIEDK;SLFEQYGK;VADLTEQYNEQYGAVR				1534	205;1520;1653;4917;6430;7278;8353	True;True;True;True;True;True;True	216;1623;1765;5217;6938;7833;8976	289;2305;2509;7450;9917;11201;12869	435;3501;3829;3830;11386;15108;17014;19579;19580;19581;19582	435;3501;3830;11386;15108;17014;19581			9606;9606;9606;9606;9606;9606;9606;9606;9606;9606;9606
RBM5	RNA-binding protein 5	1.1958	P52756;C9JFQ5;P52756-4;P52756-2;P52756-5	P52756	3;1;1;1;1	3;1;1;1;1	3;1;1;1;1	sp|P52756|RBM5_HUMAN RNA-binding protein 5 OS=Homo sapiens OX=9606 GN=RBM5 PE=1 SV=2	5	3	3	3	5	5	5	92.153	815	815;137;141;143;150	0	18.275	0.8521	1.1958	12.829	3	2	Median	1327000	718190	608810	EMMESFEGPQPADVR;LSEQELEALELR;QFDAGTVNYEQPTK				1038	2131;5434;6625	True;True;True	2270;5764;7147	3235;8217;10208	4974;12515;15568	4974;12515;15568			9606;9606;9606;9606;9606
DYNC1LI1	Cytoplasmic dynein 1 light intermediate chain 1	1.1935	E9PHI6;Q9Y6G9	E9PHI6;Q9Y6G9	4;4	4;4	4;4	tr|E9PHI6|E9PHI6_HUMAN Isoform of Q9Y6G9, Cytoplasmic dynein 1 light intermediate chain 1 OS=Homo sapiens OX=9606 GN=DYNC1LI1 PE=1 SV=1;sp|Q9Y6G9|DC1L1_HUMAN Cytoplasmic dynein 1 light intermediate chain 1 OS=Homo sapiens OX=9606 GN=DYNC1LI1 PE=1 SV=3	2	4	4	4	14.3	14.3	14.3	43.193	407	407;523	0	25.772	0.93078	1.1935	23.031	4	1	Leave out requantified	18247000	1968900	16278000	AEDNFEDIITKPPVR;DAVFIPAGWDNDKK;IGILHENFQTLK;SVSSNVASVSPIPAGSK				413	208;1077;3799;7641	True;True;True;True	220;1149;4022;8220	295;1644;5733;11735	443;2491;8816;8817;17849;17850	443;2491;8816;17850			9606;9606
GTF3C5	General transcription factor 3C polypeptide 5	1.1929	Q5T7U1;Q9Y5Q8-2;Q9Y5Q8;Q9Y5Q8-3;Q5T7U0;Q5T7U4;H7BY84	Q5T7U1;Q9Y5Q8-2;Q9Y5Q8;Q9Y5Q8-3;Q5T7U0;Q5T7U4;H7BY84	2;2;2;2;1;1;1	2;2;2;2;1;1;1	2;2;2;2;1;1;1	tr|Q5T7U1|Q5T7U1_HUMAN Isoform of Q9Y5Q8, General transcription factor 3C polypeptide 5 OS=Homo sapiens OX=9606 GN=GTF3C5 PE=1 SV=1;sp|Q9Y5Q8-2|TF3C5-2_HUMAN Isoform of Q9Y5Q8, Isoform 2 of General transcription factor 3C polypeptide 5 OS=Homo sapiens OX=9	7	2	2	2	3.7	3.7	3.7	52.29	457	457;509;519;526;224;244;345	0.00074794	11.019	0.87123	1.1929	6.0597	2	0	Median	1032300	541870	490440	FSTSSLLLR;IYQVLDFR				1315	2729;4282	True;True	2907;4543	4120;6478	6322;9968	6322;9968			9606;9606;9606;9606;9606;9606;9606
HSPA6;HSPA7	Heat shock 70 kDa protein 6;Putative heat shock 70 kDa protein 7	1.1922	P17066;P48741	P17066;P48741	7;4	1;1	1;1	sp|P17066|HSP76_HUMAN Heat shock 70 kDa protein 6 OS=Homo sapiens OX=9606 GN=HSPA6 PE=1 SV=2;sp|P48741|HSP77_HUMAN Putative heat shock 70 kDa protein 7 OS=Homo sapiens OX=9606 GN=HSPA7 PE=5 SV=2	2	7	1	1	12.8	1.7	1.7	71.027	643	643;367	0	12.228	0.96606	1.1922	12.2	7	0	Median	104850000	51979000	52873000	ATAGDTHLGGEDFDNR;DNNLLGR;FEELCSDLFR;IINEPTAAAIAYGLDR;LLQDFFNGK;TTPSYVAFTDTER;VEILANDQGNR				863	825;1343;2497;3877;5136;8227;8492	False;False;False;False;False;False;True	875;1436;2656;4103;5445;8842;9124	1222;1223;2047;3777;5853;5854;7792;7793;12677;12678;12679;12680;13090;13091;13092;13093;13094;13095;13096	1829;1830;1831;1832;1833;3094;5804;8996;8997;8998;8999;11882;11883;11884;11885;19282;19283;19284;19285;19286;19287;19934;19935;19936;19937;19938;19939;19940;19941;19942;19943;19944;19945;19946;19947;19948;19949	1831;3094;5804;8999;11883;19287;19947			9606;9606
MAP7	Ensconsin	1.1917	A0A087WZ40;Q14244-5;Q14244-3;Q14244-2;Q14244-6;Q14244-4;Q14244;Q14244-7	A0A087WZ40;Q14244-5;Q14244-3;Q14244-2;Q14244-6;Q14244-4;Q14244;Q14244-7	2;2;2;2;2;2;2;2	2;2;2;2;2;2;2;2	2;2;2;2;2;2;2;2	tr|A0A087WZ40|A0A087WZ40_HUMAN Isoform of Q14244, Ensconsin OS=Homo sapiens OX=9606 GN=MAP7 PE=1 SV=1;sp|Q14244-5|MAP7-5_HUMAN Isoform of Q14244, Isoform 5 of Ensconsin OS=Homo sapiens OX=9606 GN=MAP7 PE=1 SV=1;sp|Q14244-3|MAP7-3_HUMAN Isoform of Q14244, I	8	2	2	2	3.1	3.1	3.1	87.817	779	779;603;655;712;734;734;749;771	0	12.785	0.86082	1.1917	18.648	2	0	Median	741680	354350	387330	LLTPTHSFLAR;TSAGTTDPEEATR				42	5172;8154	True;True	5486;8765	7840;12568	11959;19119;19120	11959;19120			9606;9606;9606;9606;9606;9606;9606;9606
HADHB	Trifunctional enzyme subunit beta, mitochondrial;3-ketoacyl-CoA thiolase	1.1887	P55084-2;P55084;B5MD38;F5GZQ3;C9JEY0;C9JE81;C9K0M0	P55084-2;P55084;B5MD38;F5GZQ3	7;7;6;6;3;3;2	7;7;6;6;3;3;2	7;7;6;6;3;3;2	sp|P55084-2|ECHB-2_HUMAN Isoform of P55084, Isoform 2 of Trifunctional enzyme subunit beta, mitochondrial OS=Homo sapiens OX=9606 GN=HADHB PE=1 SV=3;sp|P55084|ECHB_HUMAN Trifunctional enzyme subunit beta, mitochondrial OS=Homo sapiens OX=9606 GN=HADHB PE=1	7	7	7	7	15.7	15.7	15.7	48.879	452	452;474;351;459;149;175;84	0	52.634	0.93303	1.1887	18.32	8	1	Leave out requantified	13853000	7322000	6531000	DFMYVSQDPK;DQLLLGPTYATPK;EAALGAGFSDK;LEQDEYALR;LVMAAANR;NVVVVDGVR;TPFLLSGTSYK				1051	1143;1387;1556;4730;5619;6423;8101	True;True;True;True;True;True;True	1216;1217;1488;1661;5018;5957;6931;8711	1740;1741;2117;2364;7170;8483;9908;12489	2630;2631;2632;3207;3208;3209;3594;10960;10961;12901;15092;18992;18993;18994	2631;3209;3594;10961;12901;15092;18994	712	319	9606;9606;9606;9606;9606;9606;9606
ZFR	Zinc finger RNA-binding protein	1.187	Q96KR1;H0Y8W1	Q96KR1	5;2	5;2	5;2	sp|Q96KR1|ZFR_HUMAN Zinc finger RNA-binding protein OS=Homo sapiens OX=9606 GN=ZFR PE=1 SV=2	2	5	5	5	6.6	6.6	6.6	117.01	1074	1074;182	0	30.54	0.90117	1.187	7.5458	5	1	Leave out requantified	2623900	1090700	1533200	AISSASSPQSPGDALR;GLTTTGNSSLNSTSNTK;HATIYPTEEELQAVQK;LVSDSLSEHEK;VSAVPTNMAAK				1488	426;3152;3431;5639;9007	True;True;True;True;True	447;3347;3636;5979;9672	620;4744;5176;8511;13869	937;7281;7282;7955;12951;21172	937;7282;7955;12951;21172	1079	492	9606;9606
TFIP11	Tuftelin-interacting protein 11	1.1813	Q9UBB9;H0Y4U8;Q9UBB9-2	Q9UBB9	3;1;1	3;1;1	3;1;1	sp|Q9UBB9|TFP11_HUMAN Tuftelin-interacting protein 11 OS=Homo sapiens OX=9606 GN=TFIP11 PE=1 SV=1	3	3	3	3	3.6	3.6	3.6	96.819	837	837;190;196	0	17.649	0.90398	1.1813	32.369	3	0	Leave out requantified	1826200	814760	1011500	ENIAYLTHTER;NAQGIINPIEAK;VISNLSK				1634	2149;6024;8686	True;True;True	2290;6495;9328	3261;9211;13388	5019;13996;20421	5019;13996;20421			9606;9606;9606
ASCC1	Activating signal cointegrator 1 complex subunit 1	1.1804	Q8N9N2-2;Q8N9N2;H0YE76;H0YCB3;E9PR40;H0YER2;E9PM82;E9PQZ6;E9PQ44;E9PJM2;E9PL92;E9PKM6	Q8N9N2-2;Q8N9N2;H0YE76;H0YCB3;E9PR40;H0YER2	6;6;5;5;3;3;2;2;1;1;1;1	6;6;5;5;3;3;2;2;1;1;1;1	6;6;5;5;3;3;2;2;1;1;1;1	sp|Q8N9N2-2|ASCC1-2_HUMAN Isoform of Q8N9N2, Isoform 2 of Activating signal cointegrator 1 complex subunit 1 OS=Homo sapiens OX=9606 GN=ASCC1 PE=1 SV=1;sp|Q8N9N2|ASCC1_HUMAN Activating signal cointegrator 1 complex subunit 1 OS=Homo sapiens OX=9606 GN=ASCC	12	6	6	6	14.6	14.6	14.6	41.227	357	357;400;176;292;139;145;124;152;43;56;103;123	0	37.388	0.97358	1.1804	5.598	6	3	Leave out requantified	14513000	3901900	10612000	FQASGLIVK;FQEEVLAK;IDVLLDTFR;LQELVDR;MEVLRPQLIR;YNLYTAEGK				1398	2676;2681;3690;5333;5792;9485	True;True;True;True;True;True	2853;2858;3909;5661;6169;10175	4048;4053;5565;8087;8759;14619	6222;6223;6228;6229;8542;12326;13338;22326	6222;6228;8542;12326;13338;22326			9606;9606;9606;9606;9606;9606;9606;9606;9606;9606;9606;9606
EIF3M	Eukaryotic translation initiation factor 3 subunit M	1.1798	Q7L2H7;H0YCQ8;Q7L2H7-2;J3KNJ2;E9PRY0;E9PN86	Q7L2H7;H0YCQ8;Q7L2H7-2;J3KNJ2	5;4;4;3;2;1	5;4;4;3;2;1	5;4;4;3;2;1	sp|Q7L2H7|EIF3M_HUMAN Eukaryotic translation initiation factor 3 subunit M OS=Homo sapiens OX=9606 GN=EIF3M PE=1 SV=1;tr|H0YCQ8|H0YCQ8_HUMAN Isoform of Q7L2H7, Eukaryotic translation initiation factor 3 subunit M (Fragment) OS=Homo sapiens OX=9606 GN=EIF3M	6	5	5	5	13.9	13.9	13.9	42.502	374	374;220;242;191;74;102	0	37.938	1.002	1.1798	8.4465	11	1	Leave out requantified	33029000	16343000	16685000	DFIDSLGLLHEQNMAK;LLTFMGMAVENK;LLYEALVDCK;LLYEALVDCKK;LQLLSNLFHGMDK				1344	1132;5166;5190;5191;5359	True;True;True;True;True	1205;5477;5478;5479;5504;5505;5688	1726;1727;7830;7831;7832;7833;7863;7864;8125;8126;8127	2610;2611;2612;2613;11942;11943;11944;11945;11946;11947;11987;11988;12384;12385;12386;12387	2610;11944;11987;11988;12386	1013;1014;1015;1016	113;274;283;285	9606;9606;9606;9606;9606;9606
SMARCE1	SWI/SNF-related matrix-associated actin-dependent regulator of chromatin subfamily E member 1	1.1788	Q969G3;Q969G3-2;B4DGM3;A0A2R8Y855;A0A2R8Y7U4;Q969G3-4;Q969G3-3;Q969G3-5;Q969G3-6;A0A2R8YES3;A0A2R8Y4T4;A0A2R8Y7I9;J3QKS7;A0A2U3TZQ7;A0A2R8Y765;K7EMQ8;J3QR61;H7C048;J3QL66;J3QKX6;A0A2R8YD78;J3KT85;A0A2R8YEB8;A0A2R8YDQ4	Q969G3;Q969G3-2;B4DGM3;A0A2R8Y855;A0A2R8Y7U4;Q969G3-4;Q969G3-3;Q969G3-5;Q969G3-6;A0A2R8YES3;A0A2R8Y4T4;A0A2R8Y7I9;J3QKS7;A0A2U3TZQ7;A0A2R8Y765;K7EMQ8;J3QR61;H7C048	5;5;5;5;4;4;4;4;4;4;4;4;4;4;4;3;3;3;1;1;1;1;1;1	5;5;5;5;4;4;4;4;4;4;4;4;4;4;4;3;3;3;1;1;1;1;1;1	5;5;5;5;4;4;4;4;4;4;4;4;4;4;4;3;3;3;1;1;1;1;1;1	sp|Q969G3|SMCE1_HUMAN SWI/SNF-related matrix-associated actin-dependent regulator of chromatin subfamily E member 1 OS=Homo sapiens OX=9606 GN=SMARCE1 PE=1 SV=2;sp|Q969G3-2|SMCE1-2_HUMAN Isoform of Q969G3, Isoform 2 of SWI/SNF-related matrix-associated act	24	5	5	5	15.6	15.6	15.6	46.649	411	411;363;393;367;297;376;341;328;293;347;335;332;287;311;277;177;259;157;77;135;115;109;96;55	0	37.288	0.84836	1.1788	29.758	5	1	Leave out requantified	5484500	2965600	2518800	AEAALEEESR;IAAEIAQAEEQAR;KLEAELLQIEER;LGGNPGTNSR;SQSSIVPEEEQAANKGEEK				164	192;3596;4382;4856;7465	True;True;True;True;True	203;3809;4652;5154;8041	264;5427;6644;7362;11487	398;8328;8329;8330;10196;10197;11242;17474	398;8328;10196;11242;17474			9606;9606;9606;9606;9606;9606;9606;9606;9606;9606;9606;9606;9606;9606;9606;9606;9606;9606;9606;9606;9606;9606;9606;9606
EP400	E1A-binding protein p400	1.1788	Q96L91-3;Q96L91-5;Q96L91-2;Q96L91;Q96L91-4	Q96L91-3;Q96L91-5;Q96L91-2;Q96L91;Q96L91-4	3;3;3;3;2	3;3;3;3;2	3;3;3;3;2	sp|Q96L91-3|EP400-3_HUMAN Isoform of Q96L91, Isoform 3 of E1A-binding protein p400 OS=Homo sapiens OX=9606 GN=EP400 PE=1 SV=4;sp|Q96L91-5|EP400-5_HUMAN Isoform of Q96L91, Isoform 5 of E1A-binding protein p400 OS=Homo sapiens OX=9606 GN=EP400 PE=1 SV=4;sp|Q	5	3	3	3	1.3	1.3	1.3	335.8	3086	3086;3122;3123;3159;3042	0	20.064	0.88777	1.1788	21.455	4	0	Leave out requantified	1249600	731430	518180	AAAAPFQTSQASASAPR;IAQLASITGPQSR;IDENASSEQR				1489	13;3631;3661	True;True;True	15;3846;3878	22;5479;5480;5519	33;34;8414;8415;8476;8477	33;8414;8477			9606;9606;9606;9606;9606
BCLAF1	Bcl-2-associated transcription factor 1	1.1784	E9PJA7;A0A1W2PQ43;E9PK09;E9PQN2;E9PKI6;E9PK91;Q9NYF8-4;Q9NYF8-3;Q9NYF8-2;Q9NYF8;H0YF00	E9PJA7;A0A1W2PQ43;E9PK09;E9PQN2;E9PKI6;E9PK91;Q9NYF8-4;Q9NYF8-3;Q9NYF8-2;Q9NYF8;H0YF00	2;2;2;2;2;2;2;2;2;2;1	2;2;2;2;2;2;2;2;2;2;1	2;2;2;2;2;2;2;2;2;2;1	tr|E9PJA7|E9PJA7_HUMAN Isoform of Q9NYF8, Bcl-2-associated transcription factor 1 OS=Homo sapiens OX=9606 GN=BCLAF1 PE=1 SV=1;tr|A0A1W2PQ43|A0A1W2PQ43_HUMAN Isoform of Q9NYF8, Bcl-2-associated transcription factor 1 OS=Homo sapiens OX=9606 GN=BCLAF1 PE=1 S	11	2	2	2	4.3	4.3	4.3	52.917	467	467;703;725;750;752;871;747;869;918;920;118	0	11.469	0.94355	1.1784	11.117	2	0	Median	801850	401890	399960	LLASTLVHSVK;TIAPQNAPR				141	5020;7914	True;True	5328;8512	7620;12176	11630;18523	11630;18523			9606;9606;9606;9606;9606;9606;9606;9606;9606;9606;9606
CDC5L	Cell division cycle 5-like protein	1.1776	Q99459	Q99459	12	12	12	sp|Q99459|CDC5L_HUMAN Cell division cycle 5-like protein OS=Homo sapiens OX=9606 GN=CDC5L PE=1 SV=2	1	12	12	12	17.5	17.5	17.5	92.25	802	802	0	75.635	0.91781	1.1776	10.894	11	2	Leave out requantified	14862000	7622600	7239500	AAGIEIQK;AQDVLVQEMEVVK;DNEEETTDDPR;EIDDTYIEDAADVDAR;GGLNTPLHESDFSGVTPQR;GVDYNAEIPFEK;ILLGGYQSR;NTEDEILK;SGTTPKPVINSTPGR;TPSNGAEGLTPR;VGQASEIAR;YADLLLEK				1501	54;698;1335;1912;2998;3343;3955;6374;7183;8113;8606;9275	True;True;True;True;True;True;True;True;True;True;True;True	59;744;1428;2041;3188;3547;4186;6882;7734;8723;9244;9952	76;1056;2031;2916;4521;5044;5983;9839;11033;12508;13271;14278	114;115;1582;1583;3069;4463;6952;6953;6954;6955;7742;9194;14991;14992;16776;19022;19023;20246;21789;21790	114;1582;3069;4463;6955;7742;9194;14991;16776;19022;20246;21790			9606
LTV1	Protein LTV1 homolog	1.1771	Q96GA3;A0A075B6Q4	Q96GA3	3;1	3;1	3;1	sp|Q96GA3|LTV1_HUMAN Protein LTV1 homolog OS=Homo sapiens OX=9606 GN=LTV1 PE=1 SV=1	2	3	3	3	7.2	7.2	7.2	54.854	475	475;140	0	20.867	0.92077	1.1771	1.8332	4	0	Leave out requantified	2912100	1466200	1446000	ATGEEEGMDIQK;DPLAADESAPQR;LQEVLNDYYK				1477	844;1361;5340	True;True;True	899;1458;5669	1254;2076;8098;8099	1879;3144;3145;12340;12341;12342	1879;3144;12341			9606;9606
MSH2	DNA mismatch repair protein Msh2	1.1752	P43246-2;P43246;A0A2R8YFH0;E9PHA6;A0A2R8Y6P0;A0A2R8YG02;A0A2R8Y7S8;C9J809	P43246-2;P43246;A0A2R8YFH0;E9PHA6;A0A2R8Y6P0;A0A2R8YG02;A0A2R8Y7S8	4;4;3;3;3;3;2;1	4;4;3;3;3;3;2;1	4;4;3;3;3;3;2;1	sp|P43246-2|MSH2-2_HUMAN Isoform of P43246, Isoform 2 of DNA mismatch repair protein Msh2 OS=Homo sapiens OX=9606 GN=MSH2 PE=1 SV=1;sp|P43246|MSH2_HUMAN DNA mismatch repair protein Msh2 OS=Homo sapiens OX=9606 GN=MSH2 PE=1 SV=1;tr|A0A2R8YFH0|A0A2R8YFH0_HUM	8	4	4	4	5.1	5.1	5.1	97.321	868	868;934;918;921;924;938;558;140	0	38.192	0.9473	1.1752	6.2606	2	0	Median	1315100	635030	680120	LVNQWIK;NKTEYEEAQDAIVK;NNSFVNEIISR;QVGVGYVDSIQR				987	5626;6163;6273;6816	True;True;True;True	5965;6638;6764;7343	8496;9448;9647;10485	12919;14369;14663;15964	12919;14369;14663;15964			9606;9606;9606;9606;9606;9606;9606;9606
RFC4	Replication factor C subunit 4	1.1751	P35249;C9JZI1;P35249-2;C9J8M3;C9JTT7;C9JXZ7;H7C1P0;C9JW34;C9JGY5;F8WE44	P35249;C9JZI1;P35249-2;C9J8M3;C9JTT7	8;7;7;5;4;3;2;1;1;1	8;7;7;5;4;3;2;1;1;1	8;7;7;5;4;3;2;1;1;1	sp|P35249|RFC4_HUMAN Replication factor C subunit 4 OS=Homo sapiens OX=9606 GN=RFC4 PE=1 SV=2;tr|C9JZI1|C9JZI1_HUMAN Isoform of P35249, Replication factor C subunit 4 OS=Homo sapiens OX=9606 GN=RFC4 PE=1 SV=1;sp|P35249-2|RFC4-2_HUMAN Isoform of P35249, Iso	10	8	8	8	23.1	23.1	23.1	39.681	363	363;336;303;214;167;123;111;43;95;97	0	52.099	0.92502	1.1751	5.7257	14	4	Leave out requantified	17285000	10435000	6850300	AITFLQSATR;ELFGPELFR;GTSISTKPPLTK;IIEPLTSR;ISDEGIAYLVK;NFAQLTVSGSR;VITDIAGVIPAEK;VLELNASDER				948	431;2025;3328;3860;4129;6085;8688;8748	True;True;True;True;True;True;True;True	452;2160;3530;4086;4381;6557;9330;9394	625;3090;3091;3092;5019;5820;5821;5822;5823;6239;9309;9310;13390;13391;13492;13493	943;944;4746;4747;4748;4749;7705;7706;8949;8950;8951;8952;9592;14143;14144;20424;20425;20426;20427;20569;20570	944;4748;7706;8951;9592;14143;20425;20569			9606;9606;9606;9606;9606;9606;9606;9606;9606;9606
NOB1	RNA-binding protein NOB1	1.1742	Q9ULX3;H3BUR4	Q9ULX3	4;1	4;1	4;1	sp|Q9ULX3|NOB1_HUMAN RNA-binding protein NOB1 OS=Homo sapiens OX=9606 GN=NOB1 PE=1 SV=1	2	4	4	4	8.5	8.5	8.5	46.674	412	412;66	0	25.103	0.90775	1.1742	5.1148	5	0	Leave out requantified	9072200	4721900	4350300	HAALQDIGK;LVTEFSK;SATLQVR;YAINPHLTEDQR				1659	3422;5649;6985;9280	True;True;True;True	3627;5989;7522;9957	5161;8527;10747;14283;14284	7933;12972;12973;16350;21800;21801;21802;21803	7933;12972;16350;21800			9606;9606
STAU1	Double-stranded RNA-binding protein Staufen homolog 1	1.1718	Q5JW30;O95793-2;O95793;A0A087X1A5;O95793-3;Q5JW28;F6UDC6	Q5JW30;O95793-2;O95793;A0A087X1A5;O95793-3	12;12;12;11;11;4;1	12;12;12;11;11;4;1	11;11;11;10;10;4;1	tr|Q5JW30|Q5JW30_HUMAN Isoform of O95793, Double-stranded RNA-binding protein Staufen homolog 1 OS=Homo sapiens OX=9606 GN=STAU1 PE=1 SV=1;sp|O95793-2|STAU1-2_HUMAN Isoform of O95793, Isoform Short of Double-stranded RNA-binding protein Staufen homolog 1 O	7	12	12	11	27.1	27.1	25.5	54.708	494	494;496;577;493;502;199;129	0	95.297	0.922	1.1718	7.7817	19	0	Leave out requantified	36595000	18536000	18059000	ATVTAMIAR;ELLYGGTSPTAETILK;ESEEENLNK;ILQNEPLPER;LAQIQQAK;LLSELDQQSTEMPR;NAAENMLEILGFK;NAAIAVLEELK;NLPVNFEVAR;VPQAQPTKPALK;VQGFQVEYK;VSVGEFVGEGEGK				766	883;2062;2250;3977;4569;5154;5994;5995;6212;8947;8972;9049	True;True;True;True;True;True;True;True;True;True;True;True	939;2197;2392;4208;4848;5463;5464;6463;6464;6691;9610;9635;9715	1313;3150;3151;3406;3407;3408;6013;6926;6927;7815;7816;7817;9166;9167;9168;9520;13788;13789;13828;13930	1968;4840;4841;4842;4843;4844;5235;5236;5237;5238;9243;9244;10603;10604;10605;10606;11922;11923;11924;11925;11926;11927;13920;13921;13922;13923;13924;13925;13926;13927;14470;14471;14472;21052;21053;21105;21106;21258;21259;21260;21261;21262	1968;4841;5235;9244;10603;11924;13922;13925;14472;21053;21105;21262	441;442	265;480	9606;9606;9606;9606;9606;9606;9606
RIOK2	Serine/threonine-protein kinase RIO2	1.1715	Q9BVS4;Q9BVS4-2;H0Y919	Q9BVS4;Q9BVS4-2	5;5;1	5;5;1	5;5;1	sp|Q9BVS4|RIOK2_HUMAN Serine/threonine-protein kinase RIO2 OS=Homo sapiens OX=9606 GN=RIOK2 PE=1 SV=2;sp|Q9BVS4-2|RIOK2-2_HUMAN Isoform of Q9BVS4, Isoform 2 of Serine/threonine-protein kinase RIO2 OS=Homo sapiens OX=9606 GN=RIOK2 PE=1 SV=2	3	5	5	5	13.8	13.8	13.8	63.282	552	552;474;140	0	32.522	0.9336	1.1715	10.839	5	0	Leave out requantified	3616500	1896800	1719700	EMQADDELLHPLGPDDK;GQVVENNSVTEFSEEK;LTNAGYDYLALK;SSGDPEQIKEDSLSEESADAR;VLTAVEMGMK				1532	2133;3255;5541;7497;8836	True;True;True;True;True	2273;3454;5876;8073;9486	3239;4895;8362;11536;13630	4978;4979;4980;7523;12734;17546;20782	4979;7523;12734;17546;20782			9606;9606;9606
CDC40	Pre-mRNA-processing factor 17	1.1714	Q5SRN1;O60508	Q5SRN1;O60508	3;3	3;3	3;3	tr|Q5SRN1|Q5SRN1_HUMAN Isoform of O60508, Pre-mRNA-processing factor 17 OS=Homo sapiens OX=9606 GN=CDC40 PE=1 SV=1;sp|O60508|PRP17_HUMAN Pre-mRNA-processing factor 17 OS=Homo sapiens OX=9606 GN=CDC40 PE=1 SV=1	2	3	3	3	8	8	8	60.83	539	539;579	0	17.908	0.93348	1.1714	12.832	3	0	Leave out requantified	1479200	670180	809040	NQGLTVFETGQK;SPSSKPSLAVAVDSAPEVAVK;YIGSVEEAEK				716	6314;7420;9399	True;True;True	6808;7990;10083	9721;11419;14482	14788;14789;17363;22102	14788;17363;22102			9606;9606
SUPT16H	FACT complex subunit SPT16	1.1682	Q9Y5B9;G3V5A4;G3V401;G3V2X0	Q9Y5B9	27;1;1;1	27;1;1;1	27;1;1;1	sp|Q9Y5B9|SP16H_HUMAN FACT complex subunit SPT16 OS=Homo sapiens OX=9606 GN=SUPT16H PE=1 SV=1	4	27	27	27	27.8	27.8	27.8	119.91	1047	1047;66;81;83	0	216.35	0.88347	1.1682	84.605	54	11	Leave out requantified	251180000	183140000	68047000	AALLTER;AASITSEVFNK;APGEQTVPALNLQNAFR;AVTLDKDAYYR;DDLYAEQMER;DLGFNGAPYR;EDGELNLMK;EELEFEVPFR;EGSLVINSK;ELAAQLNEEAK;FSVVSDK;GDKVDILYNNIK;GNENANGAPAITLLIR;ICDVYNAVMDVVK;INFYCPGSALGR;KAASITSEVFNK;LAESVEK;MQGSLEAHVNGFR;NEGNIFPNPEATFVK;NISMSVEGDYTYLR;NLGFGMGIEFR;QDSLVINLNR;SYCSNLVR;VMEIVDADEK;VTMINAIPVASLDPIK;YEEEEEQSR;YTEGVQSLNWTK				1708	75;115;656;968;1095;1273;1694;1758;1874;1974;2733;2871;3174;3655;4031;4292;4518;5930;6067;6148;6188;6596;7663;8864;9080;9328;9544	True;True;True;True;True;True;True;True;True;True;True;True;True;True;True;True;True;True;True;True;True;True;True;True;True;True;True	81;123;701;1031;1167;1357;1810;1877;2002;2106;2911;3054;3370;3872;4279;4553;4796;6379;6380;6539;6623;6665;7116;8244;9516;9747;10010;10240	102;103;150;151;975;976;977;1445;1446;1447;1448;1449;1450;1451;1452;1670;1929;1930;1931;2585;2691;2859;2860;3010;3011;3012;4136;4321;4322;4323;4324;4772;5512;6111;6498;6859;6860;9051;9052;9053;9054;9281;9282;9417;9490;10161;10162;11764;13666;13667;13668;13976;14352;14353;14700;14701;14702;14703;14704	156;157;158;230;231;232;1467;1468;1469;1470;2166;2167;2168;2169;2170;2171;2172;2173;2174;2175;2176;2177;2178;2179;2180;2181;2182;2183;2184;2185;2186;2528;2529;2910;2911;2912;2913;3944;4110;4375;4376;4377;4598;4599;4600;4601;4602;4603;4604;4605;6350;6642;6643;6644;6645;6646;6647;6648;6649;6650;7324;8464;9412;10006;10494;10495;10496;13754;13755;13756;13757;13758;13759;14099;14100;14324;14325;14432;…	157;230;1467;2182;2529;2912;3944;4110;4376;4605;6350;6650;7324;8464;9412;10006;10495;13755;14099;14325;14432;15503;17897;20853;21333;21912;22450	1189;1190;1191;1192;1193;1194	330;352;559;676;768;870	9606;9606;9606;9606
TUBG1;TUBG2	Tubulin gamma-1 chain;Tubulin gamma chain;Tubulin gamma-2 chain	1.166	P23258;K7EKE5;K7EIS0;Q9NRH3	P23258;K7EKE5;K7EIS0;Q9NRH3	3;2;2;2	3;2;2;2	3;2;2;2	sp|P23258|TBG1_HUMAN Tubulin gamma-1 chain OS=Homo sapiens OX=9606 GN=TUBG1 PE=1 SV=2;tr|K7EKE5|K7EKE5_HUMAN Isoform of P23258, Tubulin gamma-1 chain OS=Homo sapiens OX=9606 GN=TUBG1 PE=4 SV=1;tr|K7EIS0|K7EIS0_HUMAN Isoform of P23258, Tubulin gamma chain (	4	3	3	3	6.4	6.4	6.4	51.169	451	451;135;265;451	0	19.709	0.84219	1.166	0.26944	2	0	Median	2777300	1341200	1436200	AVLLDLEPR;EAFLEQFR;VIHSILNSPYAK				887	932;1579;8656	True;True;True	992;1686;9297	1392;2392;13348	2088;3636;20360	2088;3636;20360			9606;9606;9606;9606
PLRG1	Pleiotropic regulator 1	1.1652	O43660-2;O43660;H0YA24;H0YAA2	O43660-2;O43660;H0YA24	6;6;3;1	6;6;3;1	6;6;3;1	sp|O43660-2|PLRG1-2_HUMAN Isoform of O43660, Isoform 2 of Pleiotropic regulator 1 OS=Homo sapiens OX=9606 GN=PLRG1 PE=1 SV=1;sp|O43660|PLRG1_HUMAN Pleiotropic regulator 1 OS=Homo sapiens OX=9606 GN=PLRG1 PE=1 SV=1;tr|H0YA24|H0YA24_HUMAN Isoform of O43660,	4	6	6	6	17.2	17.2	17.2	56.289	505	505;514;156;106	0	35.602	0.89681	1.1652	16.148	8	0	Leave out requantified	5614300	2925300	2689100	ASVHTLSGHTNAVATVR;CQAAEPQIITGSHDTTIR;EDDTATEETHPVSWKPEIIK;HYTFASGSPDNIK;LLTAEADK;LSLTGHISTVR				705	814;1024;1690;3594;5164;5455	True;True;True;True;True;True	864;1090;1806;3807;5475;5785	1206;1207;1544;2578;5425;7828;8245;8246	1805;1806;2322;2323;3932;8325;8326;11940;12558;12559	1805;2323;3932;8326;11940;12558			9606;9606;9606;9606
PAF1	RNA polymerase II-associated factor 1 homolog	1.1634	Q8N7H5-3;Q8N7H5;Q8N7H5-2;M0QYC7;B4DGJ5	Q8N7H5-3;Q8N7H5;Q8N7H5-2	3;3;2;1;1	3;3;2;1;1	3;3;2;1;1	sp|Q8N7H5-3|PAF1-3_HUMAN Isoform of Q8N7H5, Isoform 3 of RNA polymerase II-associated factor 1 homolog OS=Homo sapiens OX=9606 GN=PAF1 PE=1 SV=2;sp|Q8N7H5|PAF1_HUMAN RNA polymerase II-associated factor 1 homolog OS=Homo sapiens OX=9606 GN=PAF1 PE=1 SV=2;sp	5	3	3	3	7.4	7.4	7.4	55.472	485	485;531;485;94;288	0	18.958	0.92935	1.1634	9.8827	3	0	Leave out requantified	1617000	799860	817180	AGVQSGTNALLVVK;ELEAQEAR;VTPVEVMPVFPDFK				1396	362;2002;9091	True;True;True	380;2134;9760	517;3056;13994	781;4685;4686;21358;21359	781;4685;21359	1031	195	9606;9606;9606;9606;9606
EIF4B	Eukaryotic translation initiation factor 4B	1.1613	E7EX17;P23588;P23588-2;F8W0K0;F8VSC7;F8VP89;F8VX11;F8VYE9;F8VRU1	E7EX17;P23588;P23588-2	9;9;8;4;4;4;4;3;2	9;9;8;4;4;4;4;3;2	9;9;8;4;4;4;4;3;2	tr|E7EX17|E7EX17_HUMAN Isoform of P23588, Eukaryotic translation initiation factor 4B OS=Homo sapiens OX=9606 GN=EIF4B PE=1 SV=1;sp|P23588|IF4B_HUMAN Eukaryotic translation initiation factor 4B OS=Homo sapiens OX=9606 GN=EIF4B PE=1 SV=2;sp|P23588-2|IF4B-2_	9	9	9	9	16.9	16.9	16.9	69.697	616	616;611;572;169;227;275;360;185;175	0	58.762	0.94714	1.1613	13.499	10	0	Leave out requantified	15169000	7756200	7413100	AASIFGGAKPVDTAAR;GLNISAVR;RGDDSFGDKYR;SILPTAPR;SQSSDTEQQSPTSGGGK;TGSESSQTGTSTTSSR;VAPAQPSEEGPGR;VDVADQAQDK;VDVADQAQDKDRDDR				390	114;3130;6860;7219;7464;7880;8393;8465;8466	True;True;True;True;True;True;True;True;True	122;3324;7389;7773;8040;8475;9018;9095;9096	149;4707;10558;11084;11485;11486;12119;12120;12932;13050;13051	229;7225;7226;16073;16854;17472;17473;18436;18437;18438;18439;18440;18441;19681;19682;19683;19880;19881;19882	229;7226;16073;16854;17472;18438;19683;19880;19882			9606;9606;9606;9606;9606;9606;9606;9606;9606
MAEA	Macrophage erythroblast attacher	1.1599	B4DVN3;E7ESC7;Q7L5Y9-3;Q7L5Y9-2;Q7L5Y9;D6RDW4;D6REW7;D6RIB6;B4DQT1;Q7L5Y9-5;Q7L5Y9-4;D6RID6;D6RE80;D6RA86	B4DVN3;E7ESC7;Q7L5Y9-3;Q7L5Y9-2;Q7L5Y9;D6RDW4;D6REW7;D6RIB6;B4DQT1;Q7L5Y9-5;Q7L5Y9-4;D6RID6;D6RE80	4;4;4;4;4;3;3;3;3;3;3;2;2;1	4;4;4;4;4;3;3;3;3;3;3;2;2;1	4;4;4;4;4;3;3;3;3;3;3;2;2;1	tr|B4DVN3|B4DVN3_HUMAN Isoform of Q7L5Y9, E3 ubiquitin-protein transferase MAEA OS=Homo sapiens OX=9606 GN=MAEA PE=1 SV=1;tr|E7ESC7|E7ESC7_HUMAN Isoform of Q7L5Y9, E3 ubiquitin-protein transferase MAEA OS=Homo sapiens OX=9606 GN=MAEA PE=1 SV=1;sp|Q7L5Y9-3|	14	4	4	4	12.7	12.7	12.7	45.073	395	395;434;355;360;396;245;274;328;348;245;328;115;183;107	0	26.254	0.88661	1.1599	14.527	4	0	Leave out requantified	1840300	959480	880830	AVESIQAEDESAK;EHSSDQPAAASVWK;ETSHVTMVVAELEK;IQEFIELIR				248	914;1898;2317;4077	True;True;True;True	972;2026;2461;4329	1362;2895;3503;6172	2042;4431;4432;5384;9498	2042;4432;5384;9498	175	48	9606;9606;9606;9606;9606;9606;9606;9606;9606;9606;9606;9606;9606;9606
PFDN2	Prefoldin subunit 2	1.158	Q9UHV9	Q9UHV9	2	2	2	sp|Q9UHV9|PFD2_HUMAN Prefoldin subunit 2 OS=Homo sapiens OX=9606 GN=PFDN2 PE=1 SV=1	1	2	2	2	14.9	14.9	14.9	16.648	154	154	0	15.435	1.0633	1.158	34.184	4	2	Median	1743100	840940	902200	IIETLTQQLQAK;LMGEDEKPAAK				1648	3861;5209	True;True	4087;5528;5529	5824;5825;7895;7896	8953;8954;12034;12035;12036	8953;12036	1142	127	9606
MAP7D1	MAP7 domain-containing protein 1	1.157	Q3KQU3-2;Q3KQU3-4;Q3KQU3;H0YF21;Q3KQU3-3	Q3KQU3-2;Q3KQU3-4;Q3KQU3;H0YF21;Q3KQU3-3	2;2;2;1;1	2;2;2;1;1	2;2;2;1;1	sp|Q3KQU3-2|MA7D1-2_HUMAN Isoform of Q3KQU3, Isoform 2 of MAP7 domain-containing protein 1 OS=Homo sapiens OX=9606 GN=MAP7D1 PE=1 SV=1;sp|Q3KQU3-4|MA7D1-4_HUMAN Isoform of Q3KQU3, Isoform 4 of MAP7 domain-containing protein 1 OS=Homo sapiens OX=9606 GN=MAP	5	2	2	2	3.1	3.1	3.1	88.725	803	803;808;841;248;377	0	12.067	0.94383	1.157	13.869	2	0	Median	539770	254150	285620	EANANGSSPEPVK;LSASTASELSPK				1284	1618;5418	True;True	1729;5748	2455;8201	3739;12488;12489	3739;12489			9606;9606;9606;9606;9606
SUGP2	SURP and G-patch domain-containing protein 2	1.1557	M0R3F6;M0R2Z9;Q8IX01-4;Q8IX01-3;Q8IX01;M0R065;M0R216	M0R3F6;M0R2Z9;Q8IX01-4;Q8IX01-3;Q8IX01	5;5;5;5;5;1;1	5;5;5;5;5;1;1	5;5;5;5;5;1;1	tr|M0R3F6|M0R3F6_HUMAN Isoform of Q8IX01, SURP and G-patch domain-containing protein 2 OS=Homo sapiens OX=9606 GN=SUGP2 PE=1 SV=1;tr|M0R2Z9|M0R2Z9_HUMAN Isoform of Q8IX01, SURP and G-patch domain-containing protein 2 OS=Homo sapiens OX=9606 GN=SUGP2 PE=1 S	7	5	5	5	7.7	7.7	7.7	93.859	841	841;1096;1030;1040;1082;111;170	0	29.167	0.88146	1.1557	102.88	4	3	Median	4451900	3052300	1399500	ALNIVDQEGSLLGK;ATTGTQTLLSSGTR;GADQKPTSADCAVR;SSNPSISDDSYFR;VVGTIDQLVK				656	543;877;2801;7518;9144	True;True;True;True;True	578;933;2981;8094;9816	809;1306;4222;11570;14070	1215;1958;1959;6477;17604;21473	1215;1958;6477;17604;21473			9606;9606;9606;9606;9606;9606;9606
KPNA3	Importin subunit alpha-4	1.1524	O00505;H0Y4S9;O00629	O00505	3;1;1	3;1;1	3;1;1	sp|O00505|IMA4_HUMAN Importin subunit alpha-4 OS=Homo sapiens OX=9606 GN=KPNA3 PE=1 SV=2	3	3	3	3	6.9	6.9	6.9	57.81	521	521;91;521	0	20.755	0.85852	1.1524	22.493	4	2	Median	1350700	676060	674640	DSQVVQVVLDGLK;LLSSDRNPPIDDLIK;NEVTVELR				673	1432;5160;6081	True;True;True	1533;5471;6553	2177;2178;7824;9303	3300;3301;11936;14134	3300;11936;14134			9606;9606;9606
SMARCB1	SWI/SNF-related matrix-associated actin-dependent regulator of chromatin subfamily B member 1	1.152	C9JTA6;G5E975;Q12824-2;Q12824;A0A0G2JSE9;A0A0G2JRV3;A0A0U1RQQ2;A0A0U1RRB8;B5MCL5;A0A2R8YEE8;A0A2R8Y5N5	C9JTA6;G5E975;Q12824-2;Q12824;A0A0G2JSE9;A0A0G2JRV3;A0A0U1RQQ2;A0A0U1RRB8;B5MCL5;A0A2R8YEE8;A0A2R8Y5N5	4;4;4;4;3;3;2;2;2;2;2	4;4;4;4;3;3;2;2;2;2;2	4;4;4;4;3;3;2;2;2;2;2	tr|C9JTA6|C9JTA6_HUMAN Isoform of Q12824, SWI/SNF-related matrix-associated actin-dependent regulator of chromatin subfamily B member 1 (Fragment) OS=Homo sapiens OX=9606 GN=SMARCB1 PE=1 SV=2;tr|G5E975|G5E975_HUMAN Isoform of Q12824, SWI/SNF-related matrix	11	4	4	4	18.5	18.5	18.5	28.353	248	248;394;376;385;227;339;81;90;147;216;271	0	25.065	0.92316	1.152	57.632	4	2	Median	5730400	2933000	2797400	ASEVEEILDGNDEK;AVSISTEPPTYLR;DAFTWNMNEK;LDMEIDGQK				305	763;960;1046;4637	True;True;True;True	809;1023;1113;4920	1134;1436;1585;7028	1696;2155;2396;10763;10764	1696;2155;2396;10764			9606;9606;9606;9606;9606;9606;9606;9606;9606;9606;9606
LIG3	DNA ligase 3	1.1519	P49916-4;P49916-3;P49916-2;P49916;K7EJR4;K7EQB6;K7ENR9;K7ERZ5	P49916-4;P49916-3;P49916-2;P49916	3;3;3;3;1;1;1;1	3;3;3;3;1;1;1;1	3;3;3;3;1;1;1;1	sp|P49916-4|DNLI3-4_HUMAN Isoform of P49916, Isoform 4 of DNA ligase 3 OS=Homo sapiens OX=9606 GN=LIG3 PE=1 SV=2;sp|P49916-3|DNLI3-3_HUMAN Isoform of P49916, Isoform 3 of DNA ligase 3 OS=Homo sapiens OX=9606 GN=LIG3 PE=1 SV=2;sp|P49916-2|DNLI3-2_HUMAN Isof	8	3	3	3	3.8	3.8	3.8	95.801	862	862;922;949;1009;36;185;207;545	0	16.971	0.81046	1.1519	12.291	3	0	Leave out requantified	777360	465660	311700	FLHDNMVEIPNR;TQIIQDFLR;VIQEGLEGLVLK				1020	2598;8135;8674	True;True;True	2764;8745;9316	3942;12541;13373	6048;19086;20397	6048;19086;20397	677	534	9606;9606;9606;9606;9606;9606;9606;9606
MTCL1	Microtubule cross-linking factor 1	1.1502	Q9Y4B5-2;Q9Y4B5-3;Q9Y4B5;Q9Y4B5-4	Q9Y4B5-2;Q9Y4B5-3;Q9Y4B5;Q9Y4B5-4	2;2;2;1	2;2;2;1	2;2;2;1	sp|Q9Y4B5-2|MTCL1-2_HUMAN Isoform of Q9Y4B5, Isoform 2 of Microtubule cross-linking factor 1 OS=Homo sapiens OX=9606 GN=MTCL1 PE=1 SV=5;sp|Q9Y4B5-3|MTCL1-3_HUMAN Isoform of Q9Y4B5, Isoform 3 of Microtubule cross-linking factor 1 OS=Homo sapiens OX=9606 GN=	4	2	2	2	1.2	1.2	1.2	173.31	1545	1545;1586;1905;976	0.00074571	10.989	0.8701	1.1502	18.555	2	0	Median	1097400	637700	459720	LQQQYASDK;QALQNELER				1703	5377;6569	True;True	5707;7086	8152;10120	12425;15443	12425;15443			9606;9606;9606;9606
EIF5B	Eukaryotic translation initiation factor 5B	1.1484	A0A087WUT6;O60841	A0A087WUT6;O60841	22;22	22;22	22;22	tr|A0A087WUT6|A0A087WUT6_HUMAN Isoform of O60841, Eukaryotic translation initiation factor 5B OS=Homo sapiens OX=9606 GN=EIF5B PE=1 SV=1;sp|O60841|IF2P_HUMAN Eukaryotic translation initiation factor 5B OS=Homo sapiens OX=9606 GN=EIF5B PE=1 SV=4	2	22	22	22	21.2	21.2	21.2	138.68	1220	1220;1220	0	199.42	0.9282	1.1484	12.285	35	6	Leave out requantified	48439000	25280000	23159000	AETPTAAEDDNEGDKK;AMQEALAK;APIICVLGHVDTGK;DAQEMADSLGVR;DPIVMGVTVEAGQVK;ELEELSLEAQGIK;ETVAVKPTENNEEEFTSK;EVEAAQGVK;HFEATDILVSK;IEPIPGESPK;ILPQYIFNSR;LEELEAK;LLQAQGVEVPSK;LLQAQGVEVPSKDSLPK;NKPGPNIESGNEDDDASFK;NTKDEFEER;SPDSDVAATLK;TLAGLPLLVAYK;TSEVPYAGINIGPVHK;VEMYSGSDDDDDFNKLPK;VTVDTGVIPASEEK;VTVDTGVIPASEEKAETPTAAEDDNEGDKK				20	263;616;661;1068;1360;2012;2323;2348;3456;3733;3967;4691;5134;5135;6159;6380;7395;7977;8162;8506;9107;9108	True;True;True;True;True;True;True;True;True;True;True;True;True;True;True;True;True;True;True;True;True;True	279;656;706;1138;1457;2145;2468;2496;3662;3953;4198;4977;5443;5444;6634;6888;7963;8577;8773;9141;9776;9777	374;375;376;914;984;1630;1631;1632;2074;2075;3069;3511;3573;5212;5213;5214;5215;5631;5995;7104;7105;7788;7789;7790;7791;9442;9443;9444;9847;11380;12279;12280;12580;12581;13119;14015;14016;14017;14018;14019	558;559;560;561;1371;1372;1481;2467;2468;2469;2470;2471;2472;2473;3138;3139;3140;3141;3142;3143;4704;4705;4706;5393;5497;5498;8008;8009;8010;8011;8653;8654;9213;10872;10873;11876;11877;11878;11879;11880;11881;14360;14361;14362;14363;14364;15000;15001;17294;17295;18701;18702;19139;19140;19141;19986;19987;21391;21392;21393;21394;21395;21396;21397;21398	558;1371;1481;2472;3142;4704;5393;5498;8010;8654;9213;10873;11876;11881;14360;15001;17295;18701;19140;19986;21396;21398	16;17	1048;1110	9606;9606
ACTR1A;ACTR1B	Alpha-centractin;Beta-centractin	1.1468	A0A1B0GVS3;R4GMT0;P61163;P42025	A0A1B0GVS3;R4GMT0;P61163;P42025	2;2;2;2	2;2;2;2	2;2;2;2	tr|A0A1B0GVS3|A0A1B0GVS3_HUMAN Isoform of P61163, Alpha-centractin OS=Homo sapiens OX=9606 GN=ACTR1A PE=1 SV=1;tr|R4GMT0|R4GMT0_HUMAN Isoform of P61163, Alpha-centractin OS=Homo sapiens OX=9606 GN=ACTR1A PE=1 SV=1;sp|P61163|ACTZ_HUMAN Alpha-centractin OS=H	4	2	2	2	8.6	8.6	8.6	24.956	221	221;332;376;376	0	11.767	0.97622	1.1468	44.249	2	1	Median	2114800	991810	1123000	IWQYVYSK;YCFPNYVGRPK				135	4265;9302	True;True	4526;9981	6457;14314	9937;21850	9937;21850			9606;9606;9606;9606
GTF3C4	General transcription factor 3C polypeptide 4	1.1465	Q9UKN8	Q9UKN8	7	7	7	sp|Q9UKN8|TF3C4_HUMAN General transcription factor 3C polypeptide 4 OS=Homo sapiens OX=9606 GN=GTF3C4 PE=1 SV=2	1	7	7	7	9.7	9.7	9.7	91.981	822	822	0	43.43	0.87268	1.1465	25.086	6	1	Leave out requantified	3803200	1886900	1916200	IEAVEMHLTR;LSDVFGSVR;LTIQANLNR;MSGLIVGSAFGPIK;NEAPEGNLGDFAEFQR;NYQVQFVTLK;QLIPIFTDVALK				1654	3698;5425;5533;5946;6057;6444;6706	True;True;True;True;True;True;True	3917;5755;5868;6399;6529;6952;7232	5574;8208;8353;9074;9260;9937;10329	8555;12501;12718;12719;13786;13787;14074;15144;15145;15739	8555;12501;12719;13786;14074;15145;15739	1148	681	9606
EIF3L	Eukaryotic translation initiation factor 3 subunit L	1.1443	B0QY89;Q9Y262;Q9Y262-2;B0QY90;C9JHP4;C9K0Q7;H7C3A0	B0QY89;Q9Y262;Q9Y262-2;B0QY90	19;19;18;13;7;7;6	19;19;18;13;7;7;6	19;19;18;13;7;7;6	tr|B0QY89|B0QY89_HUMAN Isoform of Q9Y262, Eukaryotic translation initiation factor 3 subunit L OS=Homo sapiens OX=9606 GN=EIF3L PE=1 SV=1;sp|Q9Y262|EIF3L_HUMAN Eukaryotic translation initiation factor 3 subunit L OS=Homo sapiens OX=9606 GN=EIF3L PE=1 SV=1;	7	19	19	19	30.1	30.1	30.1	70.901	607	607;564;516;466;150;183;127	0	143.75	0.98897	1.1443	10.366	33	2	Leave out requantified	186990000	93346000	93645000	EPFLQQLK;FLSPVVPNYDNVHPNYHK;GDPQVYEELFSYSCPK;IDESIHLQLR;IQLLVFK;KSEEEIDFLR;LHSLLGDYYQAIK;LYTTMPVAK;NFIQYFHK;QDLAYER;QYEQQTYQVIPEVIK;SEEEIDFLR;TVSDLIDQK;VFSDEVQQQAQLSTIR;VLENIELNK;VLENIELNKK;VSGGPSLEQR;VSSDVIDQK;VYELQASR				225	2171;2621;2875;3663;4087;4436;4925;5709;6098;6591;6836;7059;8294;8556;8750;8751;9021;9039;9215	True;True;True;True;True;True;True;True;True;True;True;True;True;True;True;True;True;True;True	2312;2788;3058;3880;4339;4710;5228;6051;6052;6571;7110;7364;7599;8913;9193;9396;9397;9687;9705;9889	3287;3968;3969;4329;5522;5523;6184;6728;6729;7466;7467;7468;7469;7470;8615;8616;9334;10155;10520;10521;10843;10844;12776;13189;13190;13191;13495;13496;13497;13498;13889;13918;14173;14174	5062;5063;5064;5065;6091;6092;6093;6655;6656;8482;8483;9513;9514;10311;10312;10313;11414;11415;11416;11417;11418;11419;11420;13115;13116;14190;15491;15492;16012;16013;16014;16498;16499;16500;19442;20109;20110;20111;20112;20113;20114;20572;20573;20574;20575;20576;21199;21242;21243;21624;21625;21626	5065;6092;6655;8483;9513;10311;11418;13115;14190;15492;16012;16500;19442;20112;20572;20575;21199;21243;21625	158	513	9606;9606;9606;9606;9606;9606;9606
THOC6	THO complex subunit 6 homolog	1.144	Q86W42-3;Q86W42-2;Q86W42	Q86W42-3;Q86W42-2;Q86W42	2;2;2	2;2;2	2;2;2	sp|Q86W42-3|THOC6-3_HUMAN Isoform of Q86W42, Isoform 3 of THO complex subunit 6 homolog OS=Homo sapiens OX=9606 GN=THOC6 PE=1 SV=1;sp|Q86W42-2|THOC6-2_HUMAN Isoform of Q86W42, Isoform 2 of THO complex subunit 6 homolog OS=Homo sapiens OX=9606 GN=THOC6 PE=1	3	2	2	2	8.1	8.1	8.1	32.89	296	296;317;341	0	16.384	0.8344	1.144	16.733	4	2	Median	2345500	1175200	1170300	SPEVLSGGEDGAVR;VDVFTNLGYR				1368	7399;8467	True;True	7967;9097	11384;11385;13052;13053	17300;17301;17302;17303;19883;19884	17300;19883			9606;9606;9606
EIF4G2	Eukaryotic translation initiation factor 4 gamma 2	1.142	H0Y3P2;D3DQV9;P78344-2;P78344;E9PKF8;H0YE22;H0YEC5;H0YD77;H0YCH5	H0Y3P2;D3DQV9;P78344-2;P78344;E9PKF8	5;5;5;5;4;1;1;1;1	5;5;5;5;4;1;1;1;1	5;5;5;5;4;1;1;1;1	tr|H0Y3P2|H0Y3P2_HUMAN Isoform of P78344, Eukaryotic translation initiation factor 4 gamma 2 OS=Homo sapiens OX=9606 GN=EIF4G2 PE=1 SV=1;tr|D3DQV9|D3DQV9_HUMAN Isoform of P78344, Eukaryotic translation initiation factor 4 gamma 2 (Fragment) OS=Homo sapiens	9	5	5	5	7	7	7	98.117	869	869;907;869;907;185;234;244;282;444	0	28.772	0.85491	1.142	3.4516	5	0	Leave out requantified	2289300	1257000	1032300	ASSLISLLK;LAEDAPNFDGPAAEGQPGQK;LEVDIPLVK;TQTPPLGQTPQLGLK;VIILSLDR				333	805;4509;4751;8147;8657	True;True;True;True;True	854;4786;5041;8758;9298	1195;6841;7207;12556;13349	1789;10468;11020;11021;19104;19105;20361;20362	1789;10468;11021;19105;20362			9606;9606;9606;9606;9606;9606;9606;9606;9606
XAB2	Pre-mRNA-splicing factor SYF1	1.1413	Q9HCS7	Q9HCS7	10	10	10	sp|Q9HCS7|SYF1_HUMAN Pre-mRNA-splicing factor SYF1 OS=Homo sapiens OX=9606 GN=XAB2 PE=1 SV=2	1	10	10	10	10.5	10.5	10.5	100.01	855	855	0	68.982	0.86815	1.1413	12.703	10	3	Leave out requantified	11966000	6338400	5627600	AAEIYGVTHTR;AEYFDGSEPVQNR;AIEVLSDEHAR;FEQLISR;FYEDNGQLDDAR;HENYDEALR;LATVVNDER;LNQLYER;RAEYFDGSEPVQNR;TTGAFWQTWK				1586	42;272;395;2515;2780;3451;4593;5256;6842;8211	True;True;True;True;True;True;True;True;True;True	47;289;414;2675;2959;3657;4875;5583;7370;8825	61;390;564;565;3812;4191;5206;6973;7986;10529;12650	93;583;584;585;848;849;5855;5856;6430;7995;7996;7997;10683;10684;12163;16025;19237	93;583;848;5855;6430;7996;10683;12163;16025;19237			9606
RBM28	RNA-binding protein 28	1.1404	Q9NW13;Q9NW13-2;C9JE21;C9JAA9;H7C5G8	Q9NW13;Q9NW13-2	8;7;2;2;1	8;7;2;2;1	8;7;2;2;1	sp|Q9NW13|RBM28_HUMAN RNA-binding protein 28 OS=Homo sapiens OX=9606 GN=RBM28 PE=1 SV=3;sp|Q9NW13-2|RBM28-2_HUMAN Isoform of Q9NW13, Isoform 2 of RNA-binding protein 28 OS=Homo sapiens OX=9606 GN=RBM28 PE=1 SV=3	5	8	8	8	11.7	11.7	11.7	85.737	759	759;618;204;283;186	0	50.664	0.89014	1.1404	15.107	8	1	Leave out requantified	7327700	3199300	4128400	AEVEQVELPDGK;DTQSVSAIGEEK;FNQLVEQYK;GFGFVQFK;LINNNPEIFGPLK;LLLSATSGEK;QQLSSEQVSR;SEQLEELFSQVGPVK				1610	264;1464;2658;2941;4964;5111;6767;7094	True;True;True;True;True;True;True;True	280;1567;2834;3127;5269;5420;7294;7638	377;2221;4019;4430;7525;7756;10410;10898	562;563;3372;3373;6170;6807;11503;11827;15856;16579	562;3373;6170;6807;11503;11827;15856;16579			9606;9606;9606;9606;9606
AKAP8	A-kinase anchor protein 8	1.1401	O43823	O43823	4	4	4	sp|O43823|AKAP8_HUMAN A-kinase anchor protein 8 OS=Homo sapiens OX=9606 GN=AKAP8 PE=1 SV=1	1	4	4	4	7.8	7.8	7.8	76.107	692	692	0	39.041	0.85093	1.1401	3.2501	5	0	Leave out requantified	6596500	3524100	3072400	GGSGGGGEGIQDR;SFDDEEIQK;TVEFLQEYIVNR;VAPAPAAADAEVEQTDAESK				710	3009;7108;8253;8390	True;True;True;True	3199;7652;8870;9015	4532;10913;12713;12714;12927;12928	6969;6970;16601;16602;16603;19337;19338;19339;19671;19672;19673;19674;19675	6970;16602;19337;19672			9606
PNN	Pinin	1.1398	Q9H307;G3V5F0;G3V579	Q9H307	14;4;4	14;4;4	14;4;4	sp|Q9H307|PININ_HUMAN Pinin OS=Homo sapiens OX=9606 GN=PNN PE=1 SV=5	3	14	14	14	21.3	21.3	21.3	81.627	717	717;117;124	0	105.28	0.92628	1.1398	11.9	27	2	Leave out requantified	21332000	11009000	10323000	DLEGAVSR;DLIQDQNMDEK;FKQESTVATER;IFGLLMGTLQK;KPALQSSVVATSK;LEVQAEEER;LLALSGPGGGR;LTEVPVEPVLTVHPESK;MEEETEVR;NVDENIR;RIEFAEQINK;TLQEQLEK;VELAQLQEEWNEHNAK;VESVEPSENEASK				1565	1264;1278;2578;3757;4410;4754;5016;5522;5769;6397;6872;8031;8494;8516	True;True;True;True;True;True;True;True;True;True;True;True;True;True	1348;1362;2743;3979;3980;4681;5044;5324;5856;6136;6137;6905;7401;8633;9126;9152	1920;1936;1937;1938;3891;5667;5668;5669;5670;5671;6681;7210;7211;7612;8338;8339;8340;8717;8718;8719;9868;10578;10579;12354;12355;13098;13099;13100;13134	2897;2919;2920;2921;2922;2923;2924;2925;2926;5979;8711;8712;8713;8714;8715;8716;8717;8718;10244;11025;11026;11027;11618;11619;12693;12694;12695;12696;12697;12698;12699;12700;13279;13280;13281;13282;15031;16101;16102;18804;18805;19951;19952;19953;19954;20014;20015	2897;2926;5979;8716;10244;11026;11618;12700;13279;15031;16102;18804;19951;20015	1106;1107	150;366	9606;9606;9606
DDX27	Probable ATP-dependent RNA helicase DDX27	1.1397	Q96GQ7;B7Z6D5;A0A087WYH5	Q96GQ7;B7Z6D5	3;3;1	3;3;1	3;3;1	sp|Q96GQ7|DDX27_HUMAN Probable ATP-dependent RNA helicase DDX27 OS=Homo sapiens OX=9606 GN=DDX27 PE=1 SV=2;tr|B7Z6D5|B7Z6D5_HUMAN Isoform of Q96GQ7, Probable ATP-dependent RNA helicase DDX27 OS=Homo sapiens OX=9606 GN=DDX27 PE=1 SV=1	3	3	3	3	4.8	4.8	4.8	89.834	796	796;765;169	0	17.483	0.87492	1.1397	13.113	3	0	Leave out requantified	1172400	555240	617180	EMQQSEAQINTAK;SADFNPDFVFTEK;SVFDEELTNTSK				258	2134;6934;7610	True;True;True	2274;7468;8189	3240;10681;11696	4981;4982;16245;17791	4982;16245;17791			9606;9606;9606
NKRF	NF-kappa-B-repressing factor	1.1395	O15226;O15226-2	O15226;O15226-2	4;4	4;4	4;4	sp|O15226|NKRF_HUMAN NF-kappa-B-repressing factor OS=Homo sapiens OX=9606 GN=NKRF PE=1 SV=2;sp|O15226-2|NKRF-2_HUMAN Isoform of O15226, Isoform 2 of NF-kappa-B-repressing factor OS=Homo sapiens OX=9606 GN=NKRF PE=1 SV=2	2	4	4	4	6.2	6.2	6.2	77.672	690	690;705	0	24.583	0.86518	1.1395	23.488	4	0	Leave out requantified	4132800	2111300	2021500	DASGQPIFNASAK;EDNIGNQLLR;TNPEYIYAPLK;YEAAGEAVK				687	1070;1716;8078;9321	True;True;True;True	1141;1834;8688;10003	1635;2629;12460;14345	2478;4011;4012;18950;18951;21899	2478;4012;18950;21899			9606;9606
SMARCC2	SWI/SNF complex subunit SMARCC2	1.1389	F8VXC8;Q8TAQ2-2;Q8TAQ2-3;Q8TAQ2;F8VZW6	F8VXC8;Q8TAQ2-2;Q8TAQ2-3;Q8TAQ2	10;10;10;10;2	10;10;10;10;2	8;8;8;8;2	tr|F8VXC8|F8VXC8_HUMAN Isoform of Q8TAQ2, SWI/SNF complex subunit SMARCC2 OS=Homo sapiens OX=9606 GN=SMARCC2 PE=1 SV=1;sp|Q8TAQ2-2|SMRC2-2_HUMAN Isoform of Q8TAQ2, Isoform 2 of SWI/SNF complex subunit SMARCC2 OS=Homo sapiens OX=9606 GN=SMARCC2 PE=1 SV=1;sp	5	10	10	8	7.8	7.8	6.1	136.18	1245	1245;1130;1152;1214;105	0	59.746	0.86013	1.1389	11.473	10	3	Leave out requantified	5761300	2950400	2810900	EALEYQR;EGGGAIEEEAK;EGGGAIEEEAKEK;EGQEEVLK;EVVESEGER;SLVALLVETQMK;TLTDEVNSPDSDRR;TPEIYLAYR;YIQAEPPTNK;YYEAADTVTQFDNVR				488	1604;1834;1835;1870;2405;7339;8047;8099;9404;9578	True;True;True;True;True;True;True;True;True;True	1713;1960;1961;1998;2560;7897;8651;8709;10088;10275	2426;2806;2807;2853;3653;3654;11295;12384;12487;14488;14750	3688;4286;4287;4288;4366;5609;5610;17146;17147;18847;18990;22113;22531	3688;4286;4288;4366;5610;17147;18847;18990;22113;22531	270	927	9606;9606;9606;9606;9606
SEC61A1;SEC61A2	Protein transport protein Sec61 subunit alpha isoform 1;Protein transport protein Sec61 subunit alpha isoform 2	1.1381	B4DR61;P61619;H7C1Q9;C9JXC6;H7C069;A6NK38;F2Z2C7;A6NIF9;C9JJV4;F8W776;Q8TC24;Q9H9S3-2;Q9H9S3-3;Q9H9S3;P61619-3	B4DR61;P61619;H7C1Q9;C9JXC6;H7C069;A6NK38;F2Z2C7;A6NIF9;C9JJV4;F8W776;Q8TC24;Q9H9S3-2;Q9H9S3-3;Q9H9S3	3;3;2;2;2;2;2;2;2;2;2;2;2;2;1	3;3;2;2;2;2;2;2;2;2;2;2;2;2;1	3;3;2;2;2;2;2;2;2;2;2;2;2;2;1	tr|B4DR61|B4DR61_HUMAN Isoform of P61619, Protein transport protein Sec61 subunit alpha isoform 1 OS=Homo sapiens OX=9606 GN=SEC61A1 PE=1 SV=1;sp|P61619|S61A1_HUMAN Protein transport protein Sec61 subunit alpha isoform 1 OS=Homo sapiens OX=9606 GN=SEC61A1	15	3	3	3	5.4	5.4	5.4	52.949	482	482;476;94;101;145;159;162;168;189;410;418;437;454;476;356	0	17.418	0.83552	1.1381	5.0131	3	0	Leave out requantified	2817500	1396300	1421200	ETSMVHELNR;IIEVGDTPK;VILASNR				246	2318;3862;8662	True;True;True	2462;4088;9303	3504;5826;13356	5385;5386;8955;20371	5385;8955;20371			9606;9606;9606;9606;9606;9606;9606;9606;9606;9606;9606;9606;9606;9606;9606
GEMIN4	Gem-associated protein 4	1.1376	I3L2C7;P57678;I3L4A4;I3L399;E7EN12;I3L4M4;I3L1J7	I3L2C7;P57678	9;9;3;3;2;2;1	9;9;3;3;2;2;1	9;9;3;3;2;2;1	tr|I3L2C7|I3L2C7_HUMAN Isoform of P57678, Gem-associated protein 4 OS=Homo sapiens OX=9606 GN=GEMIN4 PE=1 SV=1;sp|P57678|GEMI4_HUMAN Gem-associated protein 4 OS=Homo sapiens OX=9606 GN=GEMIN4 PE=1 SV=2	7	9	9	9	9.6	9.6	9.6	118.82	1047	1047;1058;271;296;184;189;70	0	57.383	0.8408	1.1376	16.064	8	0	Leave out requantified	8426700	4403600	4023100	GLTQIQSR;LDVEEVDLSLR;LLETVIDVSTADR;QVVSELAECVR;SIAEGIGPEER;SSQGTSYDSYR;TNPSVSSLLQR;VGRPIVEALR;VLQPHPVTPSDTETR				594	3150;4659;5072;6832;7200;7522;8079;8611;8816	True;True;True;True;True;True;True;True;True	3345;4943;5381;7360;7751;8098;8689;9249;9465	4742;7054;7706;10513;11056;11574;12461;13281;13602	7279;10799;11753;16003;16004;16811;16812;17610;17611;17612;17613;18952;18953;20258;20744;20745	7279;10799;11753;16003;16811;17613;18953;20258;20745			9606;9606;9606;9606;9606;9606;9606
EIF3K	Eukaryotic translation initiation factor 3 subunit K	1.1345	K7ES31;K7ERF1;Q9UBQ5-2;Q9UBQ5;K7EQM4;A0A087WVB9	K7ES31;K7ERF1;Q9UBQ5-2;Q9UBQ5;K7EQM4;A0A087WVB9	5;5;5;5;3;3	5;5;5;5;3;3	5;5;5;5;3;3	tr|K7ES31|K7ES31_HUMAN Isoform of Q9UBQ5, Eukaryotic translation initiation factor 3 subunit K OS=Homo sapiens OX=9606 GN=EIF3K PE=1 SV=1;tr|K7ERF1|K7ERF1_HUMAN Isoform of Q9UBQ5, Eukaryotic translation initiation factor 3 subunit K OS=Homo sapiens OX=9606	6	5	5	5	43.8	43.8	43.8	15.875	137	137;192;211;218;170;185	0	45.744	1.0223	1.1345	9.4383	7	0	Leave out requantified	14383000	7394700	6988600	ALTNLPHTDFTLCK;AMFEQMR;CMIDQAHQEERPIR;ENAYDLEANLAVLK;YNPENLATLER				647	576;608;1017;2140;9487	True;True;True;True;True	612;646;1082;2281;10179	848;849;898;1536;3249;14623;14624	1274;1275;1276;1277;1278;1350;2308;4999;5000;22330;22331	1277;1350;2308;5000;22331	337;338	3;7	9606;9606;9606;9606;9606;9606
NAA15	N-alpha-acetyltransferase 15, NatA auxiliary subunit	1.1323	A0A0B4J1W3;Q9BXJ9;Q9BXJ9-4;Q6N069	A0A0B4J1W3;Q9BXJ9;Q9BXJ9-4	5;5;3;1	5;5;3;1	5;5;3;1	tr|A0A0B4J1W3|A0A0B4J1W3_HUMAN Isoform of Q9BXJ9, N-alpha-acetyltransferase 15, NatA auxiliary subunit OS=Homo sapiens OX=9606 GN=NAA15 PE=1 SV=1;sp|Q9BXJ9|NAA15_HUMAN N-alpha-acetyltransferase 15, NatA auxiliary subunit OS=Homo sapiens OX=9606 GN=NAA15 PE	4	5	5	5	5.5	5.5	5.5	101.2	865	865;866;526;864	0	28.499	0.86032	1.1323	30.429	5	0	Leave out requantified	3247700	1513100	1734600	EALEHLCTYEK;FLLMLQSVK;IYEEAWTK;MVYYLDPSSQK;NPENWAYYK				91	1602;2608;4268;5987;6288	True;True;True;True;True	1711;2774;4529;6454;6779	2424;3953;6461;9157;9672	3684;3685;6066;9942;9943;13909;14709	3685;6066;9943;13909;14709			9606;9606;9606;9606
SART1	U4/U6.U5 tri-snRNP-associated protein 1	1.1318	O43290;E9PQI8	O43290	13;3	13;3	13;3	sp|O43290|SNUT1_HUMAN U4/U6.U5 tri-snRNP-associated protein 1 OS=Homo sapiens OX=9606 GN=SART1 PE=1 SV=1	2	13	13	13	20.9	20.9	20.9	90.254	800	800;164	0	117.36	0.87087	1.1318	10.214	17	3	Leave out requantified	21209000	11268000	9941100	ADDLLPLGDQTQDGDFGSR;EAAGTTAAAGTGGATEQPPR;GLAAALLLCQNK;GLLETTVQK;IEYVDETGRK;KLDEEALLK;LEQGGTADGLR;LGLKPLEVNAIK;LQAQSLSTVGPR;MSSSDTPLGTVALLQEK;QLQQLQQLR;TPYIVLSGSGK;TSSGDASSLSIEETNK				700	148;1552;3087;3123;3747;4375;4733;4877;5318;5953;6718;8126;8187	True;True;True;True;True;True;True;True;True;True;True;True;True	156;1657;3280;3317;3969;4645;5021;5177;5646;6406;7244;8736;8800	195;196;2358;2359;4650;4697;5657;6634;7175;7176;7177;7397;8067;8068;9081;10346;12531;12614	298;299;300;301;3581;3582;3583;3584;3585;3586;7143;7144;7211;8694;10181;10968;10969;10970;11300;12293;12294;12295;12296;13795;13796;13797;15765;15766;19068;19069;19183;19184	299;3584;7144;7211;8694;10181;10969;11300;12295;13795;15765;19069;19183	397	759	9606;9606
NAP1L4	Nucleosome assembly protein 1-like 4	1.1313	E9PNW0;E9PJJ2;E9PS34;E9PNJ7;E9PKT8;C9J6D1;C9JZI7;Q99733;Q99733-2;A8MXH2;E9PKI2;C9J1B1;E9PP22	E9PNW0;E9PJJ2;E9PS34;E9PNJ7;E9PKT8;C9J6D1;C9JZI7;Q99733;Q99733-2;A8MXH2	3;3;3;3;3;3;3;3;3;2;1;1;1	2;2;2;2;2;2;2;2;2;1;1;1;1	2;2;2;2;2;2;2;2;2;1;1;1;1	tr|E9PNW0|E9PNW0_HUMAN Isoform of Q99733, Nucleosome assembly protein 1-like 4 (Fragment) OS=Homo sapiens OX=9606 GN=NAP1L4 PE=1 SV=1;tr|E9PJJ2|E9PJJ2_HUMAN Isoform of Q99733, Nucleosome assembly protein 1-like 4 (Fragment) OS=Homo sapiens OX=9606 GN=NAP1L	13	3	2	2	29	19.6	19.6	12.25	107	107;128;133;140;169;178;278;375;386;156;78;101;154	0	13.194	0.79521	1.1313	22.078	3	0	Plateau	1640200	945910	694270	FYEEVHDLER;LTDQVMQNPR;YAALYQPLFDK				286	2781;5510;9271	False;True;True	2960;5843;5844;9948	4192;4193;4194;8323;8324;14274	6431;6432;6433;6434;12668;12669;12670;21780;21781	6433;12669;21780	187	32	9606;9606;9606;9606;9606;9606;9606;9606;9606;9606;9606;9606;9606
NUP98	Nuclear pore complex protein Nup98-Nup96;Nuclear pore complex protein Nup98;Nuclear pore complex protein Nup96	1.1309	H7C3P6;P52948-6;P52948-2;P52948-5;P52948;A0A3B3ITD8	H7C3P6;P52948-6;P52948-2;P52948-5;P52948;A0A3B3ITD8	2;2;2;2;2;1	2;2;2;2;2;1	2;2;2;2;2;1	tr|H7C3P6|H7C3P6_HUMAN Isoform of P52948, Nuclear pore complex protein Nup98-Nup96 (Fragment) OS=Homo sapiens OX=9606 GN=NUP98 PE=1 SV=1;sp|P52948-6|NUP98-6_HUMAN Isoform of P52948, Isoform 6 of Nuclear pore complex protein Nup98-Nup96 OS=Homo sapiens OX=9	6	2	2	2	3.1	3.1	3.1	85.676	753	753;1714;1726;1800;1817;1348	0	13.273	0.85657	1.1309	22.526	3	2	Median	1018800	642580	376180	EASGDLPEAQIVK;TSDSTPDPQR				581	1644;8159	True;True	1756;8770	2492;12576;12577	3803;3804;19135;19136	3803;19136			9606;9606;9606;9606;9606;9606
EIF3F	Eukaryotic translation initiation factor 3 subunit F	1.1273	O00303;H0YDT6	O00303	11;3	11;3	11;3	sp|O00303|EIF3F_HUMAN Eukaryotic translation initiation factor 3 subunit F OS=Homo sapiens OX=9606 GN=EIF3F PE=1 SV=1	2	11	11	11	33.6	33.6	33.6	37.563	357	357;100	0	119.1	1.0027	1.1273	9.0845	20	1	Leave out requantified	139280000	71503000	67773000	AYVSTLMGVPGR;EAPNPIHLTVDTSLQNGR;FLMSLVNQVPK;IGVDLIMK;NMYELHK;TCFSPNR;TMGVMFTPLTVK;VIGLSSDLQQVGGASAR;VIGTLLGTVDK;VSADNTVGR;YAYYDTER				664	1003;1629;2611;3823;6258;7743;8055;8650;8654;9002;9300	True;True;True;True;True;True;True;True;True;True;True	1068;1740;2777;2778;4047;6749;8329;8660;8661;8662;9290;9295;9667;9979	1509;1510;2468;2469;3956;3957;3958;5767;9620;11913;12407;12408;12409;12410;12411;13335;13336;13341;13342;13863;14311	2272;2273;2274;3756;3757;3758;3759;6070;6071;6072;6073;6074;6075;8867;8868;14613;18116;18880;18881;18882;18883;18884;18885;18886;18887;18888;18889;18890;20340;20341;20342;20351;20352;20353;21162;21163;21846	2274;3757;6072;8867;14613;18116;18889;20341;20353;21163;21846	371;372;373;374	228;231;253;309	9606;9606
BAG3	BAG family molecular chaperone regulator 3	1.125	O95817;C9JFK9	O95817	3;1	3;1	3;1	sp|O95817|BAG3_HUMAN BAG family molecular chaperone regulator 3 OS=Homo sapiens OX=9606 GN=BAG3 PE=1 SV=3	2	3	3	3	7.3	7.3	7.3	61.594	575	575;325	0	24.056	0.86276	1.125	10.173	3	0	Leave out requantified	1437200	758100	679080	ELLALDSVDPEGR;ETAPVSQPENKPESK;VQGLEQAVDNFEGK				768	2049;2288;8973	True;True;True	2184;2432;9636	3127;3465;13829	4806;4807;4808;5322;5323;21107;21108	4808;5322;21107			9606;9606
CRNKL1	Crooked neck-like protein 1	1.1232	Q5JY65;Q9BZJ0-2;Q9BZJ0-3;Q9BZJ0	Q5JY65;Q9BZJ0-2;Q9BZJ0-3;Q9BZJ0	7;7;7;7	7;7;7;7	7;7;7;7	tr|Q5JY65|Q5JY65_HUMAN Isoform of Q9BZJ0, Crooked neck-like protein 1 OS=Homo sapiens OX=9606 GN=CRNKL1 PE=1 SV=1;sp|Q9BZJ0-2|CRNL1-2_HUMAN Isoform of Q9BZJ0, Isoform 2 of Crooked neck-like protein 1 OS=Homo sapiens OX=9606 GN=CRNKL1 PE=1 SV=4;sp|Q9BZJ0-3|	4	7	7	7	9.2	9.2	9.2	99.172	836	836;687;836;848	0	47.3	0.89493	1.1232	9.9344	6	0	Leave out requantified	5938000	2941000	2997000	AIANVPPIQEK;AIYELAISQPR;ELELLPPPPQQK;GIEDIIVSK;LMLLESWR;LVESDAEAEAVR;SFEEEFGTASDKER				1306	381;444;2017;3036;5213;5593;7114	True;True;True;True;True;True;True	400;467;2150;3228;5533;5930;7658	548;658;3079;4576;7900;8447;8448;10920	828;994;995;996;4721;4722;4723;4724;7027;12042;12853;12854;16612;16613;16614;16615	828;996;4722;7027;12042;12853;16615			9606;9606;9606;9606
PBRM1	Protein polybromo-1	1.1224	Q86U86-5;Q86U86-4;Q86U86-7;Q86U86-3;Q86U86-9;Q86U86-2;Q86U86-8;Q86U86;H0Y5B5;E7EVG2;Q86U86-6	Q86U86-5;Q86U86-4;Q86U86-7;Q86U86-3;Q86U86-9;Q86U86-2;Q86U86-8;Q86U86;H0Y5B5;E7EVG2	3;3;3;3;3;3;3;3;2;2;1	3;3;3;3;3;3;3;3;2;2;1	3;3;3;3;3;3;3;3;2;2;1	sp|Q86U86-5|PB1-5_HUMAN Isoform of Q86U86, Isoform 5 of Protein polybromo-1 OS=Homo sapiens OX=9606 GN=PBRM1 PE=1 SV=1;sp|Q86U86-4|PB1-4_HUMAN Isoform of Q86U86, Isoform 4 of Protein polybromo-1 OS=Homo sapiens OX=9606 GN=PBRM1 PE=1 SV=1;sp|Q86U86-7|PB1-7_	11	3	3	3	2.3	2.3	2.3	182.12	1582	1582;1582;1597;1602;1609;1634;1652;1689;1085;1460;856	0	21.483	0.79667	1.1224	58.135	3	1	Median	2445600	1671400	774160	LQQVMQAK;SEDSSGAAGLSGLHR;YIEGLSAESNSISK				1364	5383;7054;9396	True;True;True	5713;7594;10080	8158;10837;14479	12432;12433;16487;16488;22097	12433;16487;22097			9606;9606;9606;9606;9606;9606;9606;9606;9606;9606;9606
RBM39	RNA-binding protein 39	1.1219	Q14498;Q14498-2;Q14498-3;G3XAC6;H0Y4X3;A0A0U1RQH7;A0A0U1RQW2;Q5QP23;Q5QP22;G3V5Z6;H0YJJ3;Q86U06-4;Q86U06-5;G3XAP0;Q86U06-2;Q86U06;A0A087X122	Q14498;Q14498-2;Q14498-3;G3XAC6;H0Y4X3;A0A0U1RQH7	11;11;11;9;9;8;5;3;2;1;1;1;1;1;1;1;1	11;11;11;9;9;8;5;3;2;1;1;1;1;1;1;1;1	11;11;11;9;9;8;5;3;2;1;1;1;1;1;1;1;1	sp|Q14498|RBM39_HUMAN RNA-binding protein 39 OS=Homo sapiens OX=9606 GN=RBM39 PE=1 SV=2;sp|Q14498-2|RBM39-2_HUMAN Isoform of Q14498, Isoform 2 of RNA-binding protein 39 OS=Homo sapiens OX=9606 GN=RBM39 PE=1 SV=2;sp|Q14498-3|RBM39-3_HUMAN Isoform of Q14498,	17	11	11	11	23.8	23.8	23.8	59.379	530	530;524;508;423;336;245;163;231;193;189;214;405;417;269;423;439;59	0	81.316	0.9023	1.1219	7.9889	21	5	Leave out requantified	12361000	5711900	6649300	AAAMANNLQK;ALEQLNGFELAGR;DDVIEECNK;DLEEFFSTVGK;GIFEPFGR;IESIQLMMDSETGR;NSAQGNVYVK;SRSKSPFRK;TDASSASSFLDSDELER;TGIDLGTTGR;VLGVPIIVQASQAEK				1233	21;501;1106;1263;3042;3736;6335;7479;7758;7866;8776	True;True;True;True;True;True;True;True;True;True;True	23;24;528;1178;1347;3234;3957;6833;8055;8344;8461;9422	32;33;749;1690;1916;1917;1918;1919;4582;5636;9770;9771;11515;11942;11943;11944;12101;12102;13540;13541;13542;13543	48;49;1123;2554;2889;2890;2891;2892;2893;2894;2895;2896;7036;8661;8662;14875;14876;14877;17510;18152;18153;18154;18155;18156;18157;18414;18415;20640;20641;20642;20643;20644;20645	49;1123;2554;2895;7036;8662;14876;17510;18156;18414;20642	919;920;921	238;282;283	9606;9606;9606;9606;9606;9606;9606;9606;9606;9606;9606;9606;9606;9606;9606;9606;9606
NONO	Non-POU domain-containing octamer-binding protein	1.1218	Q15233-2;Q15233;H7C367;C9JYS8;C9IZL7;C9J4X2	Q15233-2;Q15233;H7C367;C9JYS8;C9IZL7	12;12;10;8;6;1	11;11;9;8;5;1	11;11;9;8;5;1	sp|Q15233-2|NONO-2_HUMAN Isoform of Q15233, Isoform 2 of Non-POU domain-containing octamer-binding protein OS=Homo sapiens OX=9606 GN=NONO PE=1 SV=4;sp|Q15233|NONO_HUMAN Non-POU domain-containing octamer-binding protein OS=Homo sapiens OX=9606 GN=NONO PE=1	6	12	11	11	29.1	27	27	43.866	382	382;471;234;247;207;124	0	76.306	0.9019	1.1218	9.5728	24	1	Leave out requantified	34712000	18368000	16344000	AGEVFIHK;ALIEMEK;AVVIVDDR;EKLEMEMEAAR;FACHSASLTVR;FAQPGSFEYEYAMR;GIVEFSGK;GIVEFSGKPAAR;MEELHNQEVQK;PVTVEPMDQLDDEEGLPEK;RMEELHNQEVQK;VELDNMPLR				1256	311;519;973;1969;2438;2451;3072;3073;5771;6545;6889;8496	True;True;False;True;True;True;True;True;True;True;True;True	328;550;551;1036;2100;2101;2594;2607;3265;3266;6140;6141;7059;7060;7418;7419;9128;9129	450;780;781;1459;1460;2997;2998;2999;3000;3703;3716;4633;4634;8722;8723;8724;10086;10087;10088;10089;10600;10601;10602;10603;13102;13103;13104	674;675;1175;1176;2195;2196;4582;4583;4584;4585;4586;5682;5683;5703;5704;7121;7122;7123;13287;13288;13289;13290;15386;15387;15388;15389;15390;15391;15392;15393;15394;15395;16128;16129;16130;16131;16132;19958;19959;19960;19961;19962;19963;19964	675;1175;2196;4584;5683;5703;7121;7123;13290;15395;16130;19960	940;941;942;943;944;945;946	43;138;180;188;209;211;237	9606;9606;9606;9606;9606;9606
LARP4B	La-related protein 4B	1.1211	Q92615;X6RCG6;V9GYI5;B5MCU2	Q92615;X6RCG6;V9GYI5;B5MCU2	2;1;1;1	2;1;1;1	2;1;1;1	sp|Q92615|LAR4B_HUMAN La-related protein 4B OS=Homo sapiens OX=9606 GN=LARP4B PE=1 SV=3;tr|X6RCG6|X6RCG6_HUMAN Isoform of Q92615, La-related protein 4B (Fragment) OS=Homo sapiens OX=9606 GN=LARP4B PE=1 SV=1;tr|V9GYI5|V9GYI5_HUMAN Isoform of Q92615, La-rela	4	2	2	2	2.6	2.6	2.6	80.551	738	738;57;79;131	0	11.845	0.85415	1.1211	14.495	2	0	Median	2445400	1289800	1155600	AIAINTFLPK;VVAEPQTQR				1438	380;9117	True;True	399;9786	547;14029	827;21413;21414	827;21413			9606;9606;9606;9606
CCAR1	Cell division cycle and apoptosis regulator protein 1	1.1199	Q8IX12-2;Q8IX12;A0A0C4DGG8;F5H1H2;F5H2E6;F5H3E1	Q8IX12-2;Q8IX12;A0A0C4DGG8;F5H1H2;F5H2E6	5;5;4;3;3;2	5;5;4;3;3;2	5;5;4;3;3;2	sp|Q8IX12-2|CCAR1-2_HUMAN Isoform of Q8IX12, Isoform 2 of Cell division cycle and apoptosis regulator protein 1 OS=Homo sapiens OX=9606 GN=CCAR1 PE=1 SV=2;sp|Q8IX12|CCAR1_HUMAN Cell division cycle and apoptosis regulator protein 1 OS=Homo sapiens OX=9606 G	6	5	5	5	5.7	5.7	5.7	131.04	1135	1135;1150;1043;646;772;568	0	32.101	0.88236	1.1199	6.0166	8	1	Leave out requantified	7401400	3643400	3758000	EADGEQDEEEKDDGEAK;LLLPTPTVK;NMAILDPPDADHLYSAK;SCALAEDPQELR;TILNLENSNK				1381	1563;5107;6243;6993;7937	True;True;True;True;True	1668;5416;6724;7530;8536	2373;7749;7750;9565;10757;12207;12208;12209	3605;11813;11814;11815;11816;14540;16362;18582;18583;18584	3605;11813;14540;16362;18583	1028	418	9606;9606;9606;9606;9606;9606
CSNK1A1	Casein kinase I isoform alpha	1.1194	P48729;P48729-2;U3KPX3;H0Y9X2;U3KQK7;D6REM4;E7ETM0;P48729-3;U3KQ83	P48729;P48729-2;U3KPX3;H0Y9X2;U3KQK7;D6REM4;E7ETM0;P48729-3;U3KQ83	4;4;3;3;3;3;3;3;2	4;4;3;3;3;3;3;3;2	4;4;3;3;3;3;3;3;2	sp|P48729|KC1A_HUMAN Casein kinase I isoform alpha OS=Homo sapiens OX=9606 GN=CSNK1A1 PE=1 SV=2;sp|P48729-2|KC1A-2_HUMAN Isoform of P48729, Isoform 2 of Casein kinase I isoform alpha OS=Homo sapiens OX=9606 GN=CSNK1A1 PE=1 SV=2;tr|U3KPX3|U3KPX3_HUMAN Isofo	9	4	4	4	16	16	16	38.914	337	337;365;134;167;184;236;264;325;96	0	30.592	0.88891	1.1194	7.2185	4	0	Leave out requantified	2564100	1423600	1140600	AAQQAASSSGQGQQAQTPTGK;DIKPDNFLMGIGR;FEEAPDYMYLR;TSLPWQGLK				1004	104;1212;2496;8177	True;True;True;True	112;1293;2655;8788	138;1843;3776;12598	214;215;2782;5802;5803;19161	215;2782;5802;19161	660	144	9606;9606;9606;9606;9606;9606;9606;9606;9606
DYNC1I2	Cytoplasmic dynein 1 intermediate chain 2	1.1182	Q13409;Q13409-5;Q13409-2;Q13409-7;Q13409-3;Q13409-6;E7ESD3;E7EQL5;E7EV09;E7EQU2;E7ET01;E7ETL8;E7EMU4;E9PGG1;E7ERR6;E7EUM4;E7ERH4;E7EU01	Q13409;Q13409-5;Q13409-2;Q13409-7;Q13409-3;Q13409-6;E7ESD3;E7EQL5;E7EV09;E7EQU2;E7ET01;E7ETL8;E7EMU4;E9PGG1;E7ERR6;E7EUM4;E7ERH4	6;6;6;6;6;6;4;4;4;4;4;4;4;3;3;3;3;2	6;6;6;6;6;6;4;4;4;4;4;4;4;3;3;3;3;2	6;6;6;6;6;6;4;4;4;4;4;4;4;3;3;3;3;2	sp|Q13409|DC1I2_HUMAN Cytoplasmic dynein 1 intermediate chain 2 OS=Homo sapiens OX=9606 GN=DYNC1I2 PE=1 SV=3;sp|Q13409-5|DC1I2-5_HUMAN Isoform of Q13409, Isoform 2E of Cytoplasmic dynein 1 intermediate chain 2 OS=Homo sapiens OX=9606 GN=DYNC1I2 PE=1 SV=3;s	18	6	6	6	10	10	10	71.456	638	638;637;632;630;612;611;187;305;250;185;173;184;214;110;139;137;151;121	0	46.276	0.82956	1.1182	13.028	7	1	Leave out requantified	8081100	4435200	3645900	ADAEEEAATR;EAVAPVQEESDLEK;EAVAPVQEESDLEKK;ITQVDFPPR;SVSTPSEAGSQDSGDGAVGSR;TLAEINANR				1207	143;1662;1663;4202;7643;7976	True;True;True;True;True;True	151;1776;1777;4458;8222;8576	188;2520;2521;6351;11737;11738;12278	288;289;3849;3850;9765;9766;17852;17853;17854;17855;18700	288;3849;3850;9766;17853;18700			9606;9606;9606;9606;9606;9606;9606;9606;9606;9606;9606;9606;9606;9606;9606;9606;9606;9606
SFPQ	Splicing factor, proline- and glutamine-rich	1.1177	P23246;P23246-2;H0Y9K7;H0Y9U2	P23246;P23246-2	13;12;3;2	13;12;3;2	12;11;3;2	sp|P23246|SFPQ_HUMAN Splicing factor, proline- and glutamine-rich OS=Homo sapiens OX=9606 GN=SFPQ PE=1 SV=2;sp|P23246-2|SFPQ-2_HUMAN Isoform of P23246, Isoform Short of Splicing factor, proline- and glutamine-rich OS=Homo sapiens OX=9606 GN=SFPQ PE=1 SV=2	4	13	13	12	21.2	21.2	20.1	76.149	707	707;669;223;88	0	91.17	0.9057	1.1177	13.128	17	3	Leave out requantified	55268000	29296000	25972000	AELDDTPMR;ANLSLLR;AVVIVDDR;EMEEQMR;FATHAAALSVR;FGQGGAGPVGGQGPR;GIVEFASKPAAR;ISDSEGFK;MGGGGAMNMGDPYGSGGQK;PVIVEPLEQLDDEDGLPEK;RMEELHNQEMQK;SPPPGMGLNQNR;YGEPGEVFINK				886	234;639;973;2123;2459;2550;3071;4132;5817;6541;6888;7413;9354	True;True;True;True;True;True;True;True;True;True;True;True;True	246;247;682;1036;2261;2615;2712;3264;4384;6205;6206;7055;7417;7983;10036	328;329;949;1459;1460;3222;3725;3851;3852;4631;4632;6242;8806;8807;10081;10599;11410;14413	492;493;1427;1428;2195;2196;4954;4955;5715;5716;5921;5922;5923;7119;7120;9597;13407;13408;13409;15376;15377;15378;16127;17346;17347;21998;21999;22000;22001;22002	493;1427;2196;4954;5716;5922;7120;9597;13407;15378;16127;17347;22002	572;573	357;612	9606;9606;9606;9606
HNRNPH2	Heterogeneous nuclear ribonucleoprotein H2	1.1171	P55795	P55795	7	3	3	sp|P55795|HNRH2_HUMAN Heterogeneous nuclear ribonucleoprotein H2 OS=Homo sapiens OX=9606 GN=HNRNPH2 PE=1 SV=1	1	7	3	3	19.8	7.3	7.3	49.263	449	449	0	17.955	0.79947	1.1171	13.437	3	0	Leave out requantified	2805000	1593900	1211100	DLNYCFSGMSDHR;GLPWSCSADEVMR;HTGPNSPDTANDGFVR;IQNGTSGIR;SNSVEMDWVLK;STGEAFVQFASQEIAEK;VHIEIGPDGR				1053	1296;3133;3570;4090;7384;7560;8623	False;True;False;True;True;False;False	1383;1384;3328;3783;4342;7950;8138;9261	1965;1966;1967;1968;1969;4712;5392;5393;5394;5395;6187;11362;11628;13297;13298;13299	2968;2969;2970;2971;2972;2973;2974;2975;7232;8278;8279;8280;8281;8282;8283;8284;9519;17261;17699;17700;17701;20284;20285;20286;20287	2973;7232;8284;9519;17261;17700;20285	247	271	9606
SMC1A	Structural maintenance of chromosomes protein;Structural maintenance of chromosomes protein 1A	1.1153	G8JLG1;Q14683;V9GY57;H0Y7K8	G8JLG1;Q14683	9;9;3;1	9;9;3;1	9;9;3;1	tr|G8JLG1|G8JLG1_HUMAN Isoform of Q14683, Structural maintenance of chromosomes protein OS=Homo sapiens OX=9606 GN=SMC1A PE=1 SV=2;sp|Q14683|SMC1A_HUMAN Structural maintenance of chromosomes protein 1A OS=Homo sapiens OX=9606 GN=SMC1A PE=1 SV=2	4	9	9	9	7.3	7.3	7.3	140.86	1211	1211;1233;279;262	0	64.52	0.84925	1.1153	45.901	9	2	Leave out requantified	6237700	3550100	2687700	AQVQLQLFK;DKFQETSDEFEAAR;DLTLEENQVK;HNLLQACK;LEEYITTSK;LNEQQSVLQR;TVALDGTLFQK;VLTFDLTK;YSQSDLEQTK				522	736;1239;1320;3537;4699;5235;8245;8839;9533	True;True;True;True;True;True;True;True;True	782;1322;1409;3748;4987;5561;8861;9489;10229	1099;1881;1998;5338;7125;7951;7952;12702;13633;14685	1652;2837;3018;8181;10898;12110;12111;12112;12113;19318;20785;22426	1652;2837;3018;8181;10898;12111;19318;20785;22426			9606;9606;9606;9606
CD3EAP	DNA-directed RNA polymerase I subunit RPA34	1.1141	O15446;O15446-2	O15446;O15446-2	3;3	3;3	3;3	sp|O15446|RPA34_HUMAN DNA-directed RNA polymerase I subunit RPA34 OS=Homo sapiens OX=9606 GN=CD3EAP PE=1 SV=1;sp|O15446-2|RPA34-2_HUMAN Isoform of O15446, Isoform 2 of DNA-directed RNA polymerase I subunit RPA34 OS=Homo sapiens OX=9606 GN=CD3EAP PE=1 SV=1	2	3	3	3	8.6	8.6	8.6	54.985	510	510;512	0	17.499	0.96425	1.1141	45.369	2	0	Median	535670	247720	287950	FSCPPNFTAKPPASESPR;SALAPNLLTSGK;VEPLEEAIPLPPTK				691	2703;6964;8509	True;True;True	2881;7500;9145	4081;10718;13123	6273;16300;19995	6273;16300;19995			9606;9606
[truncated: 1,155 more rows]
