# Supplementary material for: The small CRL4CSA ubiquitin ligase component DDA1 regulates transcription-coupled repair dynamics
Source: Nat Commun. 2024 Jul 29;15:6374. doi: 10.1038/s41467-024-50584-7 (PMC11286758; doi:10.1038/s41467-024-50584-7)
Supplement: Supplementary file 9 — Supplementary Data 6 [file 41467_2024_50584_MOESM9_ESM.xlsx]

## Sheet: Sheet1
Protein IDs	Protein names	Gene names	Ratio H/L normalized WT(H)+UV vs WT(L) Experiment 1	Ratio H/L normalized WT(H)+UV vs WT(L) Experiment 2	Ratio H/L normalized CSAKO(H)+UV vs CSAKO(L) Experiment 1	Ratio H/L normalized CSAKO(H)+UV vs CSAKO(L) Experiment 2	Ratio H/L normalized DDA1KO(H)+UV vs DDA1KO(L) Experiment 1	Ratio H/L normalized DDA1KO(H)+UV vs DDA1KO(L) Experiment 2	Ratio H/L normalized CSAKO(H) vs WT(L) Experiment 1	Ratio H/L normalized CSAKO(H) vs WT(L) Experiment 2	Ratio H/L normalized DDA1KO(H) vs WT(L) Experiment 1	Ratio H/L normalized DDA1KO(H) vs WT(L) Experiment 2	Majority protein IDs	Peptide counts (all)	Peptide counts (razor+unique)	Peptide counts (unique)	Protein names	Gene names	Fasta headers	Number of proteins	Peptides	Razor + unique peptides	Unique peptides	Peptides CSAKO L vs CSAKO H +UV A	Peptides CSAKO L vs CSAKO H +UV B	Peptides WT L vs CSAKO H A	Peptides WT L vs CSAKO H B	Peptides WT L vs DDA1KO H A	Peptides WT L vs DDA1KO H B	Peptides DDA1KO L vs DDA1KO H +UV A	Peptides DDA1KO L vs DDA1KO H +UV B	Peptides WT L vs WT H +UV A	Peptides WT L vs WT H +UV B	Razor + unique peptides CSAKO L vs CSAKO H +UV A	Razor + unique peptides CSAKO L vs CSAKO H +UV B	Razor + unique peptides WT L vs CSAKO H A	Razor + unique peptides WT L vs CSAKO H B	Razor + unique peptides WT L vs DDA1KO H A	Razor + unique peptides WT L vs DDA1KO H B	Razor + unique peptides DDA1KO L vs DDA1KO H +UV A	Razor + unique peptides DDA1KO L vs DDA1KO H +UV B	Razor + unique peptides WT L vs WT H +UV A	Razor + unique peptides WT L vs WT H +UV B	Unique peptides CSAKO L vs CSAKO H +UV A	Unique peptides CSAKO L vs CSAKO H +UV B	Unique peptides WT L vs CSAKO H A	Unique peptides WT L vs CSAKO H B	Unique peptides WT L vs DDA1KO H A	Unique peptides WT L vs DDA1KO H B
Q15942	Zyxin	ZYX	1.0315	1.0301	1.0621	0.94105	0.94212	1.0465	1.0854	1.1001	0.92341	0.91269	Q15942	23	23	23	Zyxin	ZYX	sp|Q15942|ZYX_HUMAN Zyxin OS=Homo sapiens OX=9606 GN=ZYX PE=1 SV=1	1	23	23	23	16	16	19	14	16	17	15	14	18	17	16	16	19	14	16	17	15	14	18	17	16	16	19	14	16	17
O95229	ZW10 interactor	ZWINT	0.89599	0.78315	0.82317	0.75591	0.61749	0.87228	0.82183	0.88807	NaN	NaN	O95229	7	7	7	ZW10 interactor	ZWINT	sp|O95229|ZWINT_HUMAN ZW10 interactor OS=Homo sapiens OX=9606 GN=ZWINT PE=1 SV=2	1	7	7	7	2	1	2	1	1	1	1	3	4	4	2	1	2	1	1	1	1	3	4	4	2	1	2	1	1	1
Q9H900	Protein zwilch homolog	ZWILCH	0.92818	0.50444	NaN	0.76967	NaN	0.30007	0.53124	0.54846	NaN	NaN	Q9H900	1	1	1	Protein zwilch homolog	ZWILCH	sp|Q9H900|ZWILC_HUMAN Protein zwilch homolog OS=Homo sapiens OX=9606 GN=ZWILCH PE=1 SV=2	1	1	1	1	0	1	1	1	0	0	0	1	1	1	0	1	1	1	0	0	0	1	1	1	0	1	1	1	0	0
O43264	Centromere/kinetochore protein zw10 homolog	ZW10	1.0376	0.9392	0.94766	0.98138	1.0939	1.0859	1.0407	0.92094	1.3019	1.1838	O43264	25	25	25	Centromere/kinetochore protein zw10 homolog	ZW10	sp|O43264|ZW10_HUMAN Centromere/kinetochore protein zw10 homolog OS=Homo sapiens OX=9606 GN=ZW10 PE=1 SV=3	1	25	25	25	11	12	11	13	9	8	15	14	15	11	11	12	11	13	9	8	15	14	15	11	11	12	11	13	9	8
A7E2V4	Zinc finger SWIM domain-containing protein 8	ZSWIM8	NaN	NaN	NaN	0.80511	NaN	1.0522	NaN	1.3082	NaN	NaN	A7E2V4	1	1	1	Zinc finger SWIM domain-containing protein 8	ZSWIM8	sp|A7E2V4|ZSWM8_HUMAN Zinc finger SWIM domain-containing protein 8 OS=Homo sapiens OX=9606 GN=ZSWIM8 PE=1 SV=1	1	1	1	1	0	1	0	1	0	0	0	1	0	0	0	1	0	1	0	0	0	1	0	0	0	1	0	1	0	0
O95218	Zinc finger Ran-binding domain-containing protein 2	ZRANB2	0.9761	0.975	1.0266	0.9729	0.93849	0.95405	0.97692	1.0192	NaN	NaN	O95218	7	7	7	Zinc finger Ran-binding domain-containing protein 2	ZRANB2	sp|O95218|ZRAB2_HUMAN Zinc finger Ran-binding domain-containing protein 2 OS=Homo sapiens OX=9606 GN=ZRANB2 PE=1 SV=2	1	7	7	7	6	6	6	6	0	1	6	6	6	6	6	6	6	6	0	1	6	6	6	6	6	6	6	6	0	1
O75312	Zinc finger protein ZPR1	ZPR1	1.0525	1.0266	1.0368	0.88249	0.93916	0.96627	0.9568	0.88106	0.91912	0.96416	O75312	17	17	17	Zinc finger protein ZPR1	ZPR1	sp|O75312|ZPR1_HUMAN Zinc finger protein ZPR1 OS=Homo sapiens OX=9606 GN=ZPR1 PE=1 SV=1	1	17	17	17	11	10	8	10	4	4	8	11	12	9	11	10	8	10	4	4	8	11	12	9	11	10	8	10	4	4
Q8NHG8	E3 ubiquitin-protein ligase ZNRF2	ZNRF2	0.87217	NaN	NaN	NaN	NaN	NaN	NaN	NaN	NaN	NaN	Q8NHG8	1	1	1	E3 ubiquitin-protein ligase ZNRF2	ZNRF2	sp|Q8NHG8|ZNRF2_HUMAN E3 ubiquitin-protein ligase ZNRF2 OS=Homo sapiens OX=9606 GN=ZNRF2 PE=1 SV=1	1	1	1	1	0	0	0	0	1	0	0	0	1	0	0	0	0	0	1	0	0	0	1	0	0	0	0	0	1	0
Q9P1U0	DNA-directed RNA polymerase I subunit RPA12	ZNRD1	NaN	NaN	NaN	NaN	0.92271	1.1393	NaN	NaN	NaN	NaN	Q9P1U0	1	1	1	DNA-directed RNA polymerase I subunit RPA12	ZNRD1	sp|Q9P1U0|RPA12_HUMAN DNA-directed RNA polymerase I subunit RPA12 OS=Homo sapiens OX=9606 GN=ZNRD1 PE=2 SV=1	1	1	1	1	0	0	0	0	0	0	1	1	0	0	0	0	0	0	0	0	1	1	0	0	0	0	0	0	0	0
Q9NWK9	Box C/D snoRNA protein 1	ZNHIT6	1.1775	0.9272	0.77868	0.99038	1.072	0.85797	0.82263	0.79795	NaN	NaN	Q9NWK9	5	5	5	Box C/D snoRNA protein 1	ZNHIT6	sp|Q9NWK9|BCD1_HUMAN Box C/D snoRNA protein 1 OS=Homo sapiens OX=9606 GN=ZNHIT6 PE=1 SV=1	1	5	5	5	4	4	3	3	1	0	1	1	3	2	4	4	3	3	1	0	1	1	3	2	4	4	3	3	1	0
Q15649	Zinc finger HIT domain-containing protein 3	ZNHIT3	0.83294	NaN	NaN	NaN	NaN	NaN	0.26858	1.2933	NaN	NaN	Q15649	1	1	1	Zinc finger HIT domain-containing protein 3	ZNHIT3	sp|Q15649|ZNHI3_HUMAN Zinc finger HIT domain-containing protein 3 OS=Homo sapiens OX=9606 GN=ZNHIT3 PE=1 SV=2	1	1	1	1	0	0	1	1	0	0	0	1	1	0	0	0	1	1	0	0	0	1	1	0	0	0	1	1	0	0
Q9UHR6	Zinc finger HIT domain-containing protein 2	ZNHIT2	0.98491	1.0764	0.91015	1.023	0.98608	1.001	0.60618	0.71952	NaN	NaN	Q9UHR6	4	4	4	Zinc finger HIT domain-containing protein 2	ZNHIT2	sp|Q9UHR6|ZNHI2_HUMAN Zinc finger HIT domain-containing protein 2 OS=Homo sapiens OX=9606 GN=ZNHIT2 PE=1 SV=1	1	4	4	4	1	1	2	2	0	0	2	3	4	2	1	1	2	2	0	0	2	3	4	2	1	1	2	2	0	0
B4DU55	Zinc finger protein 879	ZNF879	NaN	NaN	NaN	NaN	NaN	NaN	NaN	NaN	NaN	NaN	B4DU55	1	1	1	Zinc finger protein 879	ZNF879	sp|B4DU55|ZN879_HUMAN Zinc finger protein 879 OS=Homo sapiens OX=9606 GN=ZNF879 PE=2 SV=2	1	1	1	1	0	0	0	0	1	1	0	0	0	0	0	0	0	0	1	1	0	0	0	0	0	0	0	0	1	1
Q96NB3	Zinc finger protein 830	ZNF830	NaN	0.57384	NaN	NaN	NaN	0.48191	NaN	0.73072	NaN	0.66877	Q96NB3	3	3	3	Zinc finger protein 830	ZNF830	sp|Q96NB3|ZN830_HUMAN Zinc finger protein 830 OS=Homo sapiens OX=9606 GN=ZNF830 PE=1 SV=2	1	3	3	3	0	0	0	1	0	1	0	2	0	1	0	0	0	1	0	1	0	2	0	1	0	0	0	1	0	1
Q6DD87	Zinc finger protein 787	ZNF787	1.0192	0.94295	1.032	0.90912	0.99353	1.0125	0.99573	0.93083	1.1208	0.76903	Q6DD87	9	9	9	Zinc finger protein 787	ZNF787	sp|Q6DD87|ZN787_HUMAN Zinc finger protein 787 OS=Homo sapiens OX=9606 GN=ZNF787 PE=1 SV=4	1	9	9	9	6	8	6	8	4	4	5	5	4	7	6	8	6	8	4	4	5	5	4	7	6	8	6	8	4	4
Q9Y5V0	Zinc finger protein 706	ZNF706	NaN	1.3826	1.2002	1.2109	NaN	NaN	NaN	NaN	NaN	NaN	Q9Y5V0	2	2	2	Zinc finger protein 706	ZNF706	sp|Q9Y5V0|ZN706_HUMAN Zinc finger protein 706 OS=Homo sapiens OX=9606 GN=ZNF706 PE=1 SV=1	1	2	2	2	1	1	2	1	1	1	0	1	0	2	1	1	2	1	1	1	0	1	0	2	1	1	2	1	1	1
P17097	Zinc finger protein 7	ZNF7	1.3234	NaN	0.55645	0.088419	1.2045	1.4064	3.1452	1.6727	0.10871	0.21883	P17097	5	5	5	Zinc finger protein 7	ZNF7	sp|P17097|ZNF7_HUMAN Zinc finger protein 7 OS=Homo sapiens OX=9606 GN=ZNF7 PE=1 SV=1	1	5	5	5	2	1	2	2	1	1	2	3	1	0	2	1	2	2	1	1	2	3	1	0	2	1	2	2	1	1
Q5VV52	Zinc finger protein 691	ZNF691	0.8488	0.80954	NaN	NaN	1.0784	1.159	0.77929	1.3953	NaN	NaN	Q5VV52	1	1	1	Zinc finger protein 691	ZNF691	sp|Q5VV52|ZN691_HUMAN Zinc finger protein 691 OS=Homo sapiens OX=9606 GN=ZNF691 PE=1 SV=2	1	1	1	1	0	1	1	1	0	0	1	1	1	1	0	1	1	1	0	0	1	1	1	1	0	1	1	1	0	0
Q8N1G0	Zinc finger protein 687	ZNF687	0.90928	1.0183	0.99089	1.0708	0.92173	NaN	1.0265	0.96247	1.1735	1.0676	Q8N1G0	3	3	3	Zinc finger protein 687	ZNF687	sp|Q8N1G0|ZN687_HUMAN Zinc finger protein 687 OS=Homo sapiens OX=9606 GN=ZNF687 PE=1 SV=1	1	3	3	3	1	1	1	2	1	2	1	0	2	1	1	1	1	2	1	2	1	0	2	1	1	1	1	2	1	2
Q9BS34	Zinc finger protein 670	ZNF670	NaN	1.1334	1.0406	0.88364	0.86406	0.89651	0.89489	0.66312	NaN	NaN	Q9BS34	1	1	1	Zinc finger protein 670	ZNF670	sp|Q9BS34|ZN670_HUMAN Zinc finger protein 670 OS=Homo sapiens OX=9606 GN=ZNF670 PE=1 SV=1	1	1	1	1	1	1	1	1	0	0	1	1	0	1	1	1	1	1	0	0	1	1	0	1	1	1	1	1	0	0
Q96K58	Zinc finger protein 668	ZNF668	1.0121	1.0644	0.97472	1.1976	0.89395	0.84763	0.86982	0.91776	NaN	NaN	Q96K58	5	5	5	Zinc finger protein 668	ZNF668	sp|Q96K58|ZN668_HUMAN Zinc finger protein 668 OS=Homo sapiens OX=9606 GN=ZNF668 PE=1 SV=3	1	5	5	5	3	3	1	2	0	0	1	1	3	3	3	3	1	2	0	0	1	1	3	3	3	3	1	2	0	0
Q8N720	Zinc finger protein 655	ZNF655	NaN	1.1309	0.95577	1.4804	1.013	0.97158	NaN	1.0368	NaN	NaN	Q8N720	1	1	1	Zinc finger protein 655	ZNF655	sp|Q8N720|ZN655_HUMAN Zinc finger protein 655 OS=Homo sapiens OX=9606 GN=ZNF655 PE=1 SV=3	1	1	1	1	1	1	0	1	0	0	1	1	0	1	1	1	0	1	0	0	1	1	0	1	1	1	0	1	0	0
Q9H582	Zinc finger protein 644	ZNF644	0.91944	0.8041	NaN	NaN	NaN	1.0615	0.94529	1.0157	NaN	NaN	Q9H582	1	1	1	Zinc finger protein 644	ZNF644	sp|Q9H582|ZN644_HUMAN Zinc finger protein 644 OS=Homo sapiens OX=9606 GN=ZNF644 PE=1 SV=2	1	1	1	1	0	0	1	1	0	0	0	1	1	1	0	0	1	1	0	0	0	1	1	1	0	0	1	1	0	0
Q14966	Zinc finger protein 638	ZNF638	1.025	0.95779	1.0956	1.0155	0.94112	1.011	1.097	0.93936	1.0229	1.0763	Q14966	35	35	35	Zinc finger protein 638	ZNF638	sp|Q14966|ZN638_HUMAN Zinc finger protein 638 OS=Homo sapiens OX=9606 GN=ZNF638 PE=1 SV=2	1	35	35	35	15	13	12	16	12	9	17	19	13	13	15	13	12	16	12	9	17	19	13	13	15	13	12	16	12	9
Q9UEG4	Zinc finger protein 629	ZNF629	1.0325	1.2517	1.1848	1.3356	1.1489	1.0791	0.85268	0.8546	0.97643	0.99392	Q9UEG4	2	2	2	Zinc finger protein 629	ZNF629	sp|Q9UEG4|ZN629_HUMAN Zinc finger protein 629 OS=Homo sapiens OX=9606 GN=ZNF629 PE=1 SV=2	1	2	2	2	1	2	1	1	1	1	1	1	1	1	1	2	1	1	1	1	1	1	1	1	1	2	1	1	1	1
Q969S3	Zinc finger protein 622	ZNF622	1.0556	0.95234	1.0404	1.0139	1.0086	1.0154	0.9675	0.98166	0.90371	0.82513	Q969S3	15	15	15	Zinc finger protein 622	ZNF622	sp|Q969S3|ZN622_HUMAN Zinc finger protein 622 OS=Homo sapiens OX=9606 GN=ZNF622 PE=1 SV=1	1	15	15	15	10	8	9	9	8	9	9	9	9	7	10	8	9	9	8	9	9	9	9	7	10	8	9	9	8	9
Q86UK7	Zinc finger protein 598	ZNF598	0.90283	0.93063	1.8564	1.0288	1.0076	0.90759	1.0872	0.80688	NaN	NaN	Q86UK7	10	10	10	Zinc finger protein 598	ZNF598	sp|Q86UK7|ZN598_HUMAN E3 ubiquitin-protein ligase ZNF598 OS=Homo sapiens OX=9606 GN=ZNF598 PE=1 SV=1	1	10	10	10	4	5	4	3	2	4	5	6	7	7	4	5	4	3	2	4	5	6	7	7	4	5	4	3	2	4
O00488	Zinc finger protein 593	ZNF593	0.90224	0.99531	1.1352	0.82529	1.1181	0.96595	0.69434	1.0245	NaN	NaN	O00488	5	5	5	Zinc finger protein 593	ZNF593	sp|O00488|ZN593_HUMAN Zinc finger protein 593 OS=Homo sapiens OX=9606 GN=ZNF593 PE=1 SV=2	1	5	5	5	3	3	3	3	0	0	1	4	3	3	3	3	3	3	0	0	1	4	3	3	3	3	3	3	0	0
Q92610	Zinc finger protein 592	ZNF592	1.2563	1.2855	1.0883	1.179	1.112	1.0985	0.94446	1.0164	NaN	NaN	Q92610	7	7	7	Zinc finger protein 592	ZNF592	sp|Q92610|ZN592_HUMAN Zinc finger protein 592 OS=Homo sapiens OX=9606 GN=ZNF592 PE=1 SV=2	1	7	7	7	1	1	2	2	2	1	1	3	1	1	1	1	2	2	2	1	1	3	1	1	1	1	2	2	2	1
Q8NAF0	Zinc finger protein 579	ZNF579	0.89561	0.96236	1.0671	0.99573	0.63856	0.55276	0.91098	0.80648	NaN	NaN	Q8NAF0	2	2	2	Zinc finger protein 579	ZNF579	sp|Q8NAF0|ZN579_HUMAN Zinc finger protein 579 OS=Homo sapiens OX=9606 GN=ZNF579 PE=1 SV=2	1	2	2	2	1	1	2	2	0	0	1	1	2	2	1	1	2	2	0	0	1	1	2	2	1	1	2	2	0	0
Q6ZN55	Zinc finger protein 574	ZNF574	0.88424	0.9663	0.9542	1.0787	0.99817	1.0515	0.75102	0.86965	NaN	NaN	Q6ZN55	7	7	7	Zinc finger protein 574	ZNF574	sp|Q6ZN55|ZN574_HUMAN Zinc finger protein 574 OS=Homo sapiens OX=9606 GN=ZNF574 PE=1 SV=2	1	7	7	7	3	3	3	3	1	1	4	3	4	5	3	3	3	3	1	1	4	3	4	5	3	3	3	3	1	1
Q8NEP9	Zinc finger protein 555	ZNF555	NaN	1.0958	NaN	1.3774	NaN	1.2193	NaN	0.69098	NaN	NaN	Q8NEP9	1	1	1	Zinc finger protein 555	ZNF555	sp|Q8NEP9|ZN555_HUMAN Zinc finger protein 555 OS=Homo sapiens OX=9606 GN=ZNF555 PE=1 SV=4	1	1	1	1	0	1	0	1	0	0	1	1	0	1	0	1	0	1	0	0	1	1	0	1	0	1	0	1	0	0
Q8TF50	Zinc finger protein 526	ZNF526	1.0536	1.216	1.0291	0.9493	0.96798	0.86241	1.1585	0.9913	NaN	NaN	Q8TF50	1	1	1	Zinc finger protein 526	ZNF526	sp|Q8TF50|ZN526_HUMAN Zinc finger protein 526 OS=Homo sapiens OX=9606 GN=ZNF526 PE=2 SV=2	1	1	1	1	1	1	1	1	0	0	1	1	1	1	1	1	1	1	0	0	1	1	1	1	1	1	1	1	0	0
Q96C55	Zinc finger protein 524	ZNF524	NaN	1.0344	0.98078	0.88668	1.0119	NaN	1.091	1.2388	NaN	NaN	Q96C55	1	1	1	Zinc finger protein 524	ZNF524	sp|Q96C55|ZN524_HUMAN Zinc finger protein 524 OS=Homo sapiens OX=9606 GN=ZNF524 PE=1 SV=1	1	1	1	1	1	1	1	1	0	0	1	0	0	1	1	1	1	1	0	0	1	0	0	1	1	1	1	1	0	0
Q96ME7	Zinc finger protein 512	ZNF512	0.85629	0.69201	0.9256	0.98115	1.0001	0.88227	0.87554	0.60295	1.8116	1.6919	Q96ME7	8	8	8	Zinc finger protein 512	ZNF512	sp|Q96ME7|ZN512_HUMAN Zinc finger protein 512 OS=Homo sapiens OX=9606 GN=ZNF512 PE=1 SV=2	1	8	8	8	3	4	3	2	5	4	6	5	2	4	3	4	3	2	5	4	6	5	2	4	3	4	3	2	5	4
Q6ZR52;Q9P255;Q8IYN0;A6NK75;Q8TF32;Q9NZL3	Zinc finger protein 493;Zinc finger protein 492;Zinc finger protein 100;Zinc finger protein 98;Zinc finger protein 431	ZNF493;ZNF492;ZNF100;ZNF98;ZNF431	0.88981	0.99557	0.90218	0.84021	0.78604	0.80552	0.65131	0.87685	NaN	0.9885	Q6ZR52;Q9P255;Q8IYN0;A6NK75;Q8TF32	4;3;2;2;2;1	4;3;2;2;2;1	1;0;0;0;0;0	Zinc finger protein 493;Zinc finger protein 492;Zinc finger protein 100;Zinc finger protein 98;Zinc finger protein 431	ZNF493;ZNF492;ZNF100;ZNF98;ZNF431	sp|Q6ZR52|ZN493_HUMAN Zinc finger protein 493 OS=Homo sapiens OX=9606 GN=ZNF493 PE=2 SV=3;sp|Q9P255|ZN492_HUMAN Zinc finger protein 492 OS=Homo sapiens OX=9606 GN=ZNF492 PE=2 SV=2;sp|Q8IYN0|ZN100_HUMAN Zinc finger protein 100 OS=Homo sapiens OX=9606 GN=ZNF	6	4	4	1	1	3	2	1	0	1	2	2	1	2	1	3	2	1	0	1	2	2	1	2	0	1	0	0	0	0
Q96JM2	Zinc finger protein 462	ZNF462	NaN	NaN	NaN	NaN	1.2291	1.0307	0.86372	NaN	1.3784	1.2515	Q96JM2	3	3	3	Zinc finger protein 462	ZNF462	sp|Q96JM2|ZN462_HUMAN Zinc finger protein 462 OS=Homo sapiens OX=9606 GN=ZNF462 PE=1 SV=3	1	3	3	3	0	0	1	0	1	3	1	1	0	0	0	0	1	0	1	3	1	1	0	0	0	0	1	0	1	3
Q9Y4E5	Zinc finger protein 451	ZNF451	1.1714	1.1657	1.0778	1.0817	1.0058	0.96459	0.88691	1.05	1.1116	0.55738	Q9Y4E5	7	7	7	Zinc finger protein 451	ZNF451	sp|Q9Y4E5|ZN451_HUMAN E3 SUMO-protein ligase ZNF451 OS=Homo sapiens OX=9606 GN=ZNF451 PE=1 SV=2	1	7	7	7	2	3	3	5	1	2	3	3	3	4	2	3	3	5	1	2	3	3	3	4	2	3	3	5	1	2
Q96B54	Zinc finger protein 428	ZNF428	0.90644	0.91978	0.96384	0.9272	0.82181	0.86898	0.90766	1.0498	2.8444	2.1688	Q96B54	4	4	4	Zinc finger protein 428	ZNF428	sp|Q96B54|ZN428_HUMAN Zinc finger protein 428 OS=Homo sapiens OX=9606 GN=ZNF428 PE=1 SV=2	1	4	4	4	2	4	3	2	2	1	4	2	2	2	2	4	3	2	2	1	4	2	2	2	2	4	3	2	2	1
Q9H9D4	Zinc finger protein 408	ZNF408	NaN	NaN	NaN	NaN	NaN	NaN	NaN	NaN	NaN	0.49023	Q9H9D4	1	1	1	Zinc finger protein 408	ZNF408	sp|Q9H9D4|ZN408_HUMAN Zinc finger protein 408 OS=Homo sapiens OX=9606 GN=ZNF408 PE=1 SV=1	1	1	1	1	0	0	0	0	0	1	0	0	0	0	0	0	0	0	0	1	0	0	0	0	0	0	0	0	0	1
Q8TF68	Zinc finger protein 384	ZNF384	1.1476	0.94817	0.91883	0.85098	0.98775	1.1156	1.285	1.058	NaN	0.94923	Q8TF68	4	4	4	Zinc finger protein 384	ZNF384	sp|Q8TF68|ZN384_HUMAN Zinc finger protein 384 OS=Homo sapiens OX=9606 GN=ZNF384 PE=1 SV=2	1	4	4	4	3	2	2	3	3	2	2	2	3	3	3	2	2	3	3	2	2	2	3	3	3	2	2	3	3	2
Q9UL40	Zinc finger protein 346	ZNF346	NaN	1.075	NaN	NaN	NaN	NaN	0.58792	1.1586	NaN	NaN	Q9UL40	2	2	2	Zinc finger protein 346	ZNF346	sp|Q9UL40|ZN346_HUMAN Zinc finger protein 346 OS=Homo sapiens OX=9606 GN=ZNF346 PE=1 SV=1	1	2	2	2	1	0	2	1	0	0	0	0	0	1	1	0	2	1	0	0	0	0	0	1	1	0	2	1	0	0
Q9Y3S2	Zinc finger protein 330	ZNF330	0.72227	1.0396	1.326	1.0872	0.94327	1.3476	0.89316	1.0571	NaN	NaN	Q9Y3S2	3	3	3	Zinc finger protein 330	ZNF330	sp|Q9Y3S2|ZN330_HUMAN Zinc finger protein 330 OS=Homo sapiens OX=9606 GN=ZNF330 PE=1 SV=1	1	3	3	3	2	1	2	1	1	0	1	1	1	2	2	1	2	1	1	0	1	1	1	2	2	1	2	1	1	0
Q5BKZ1	DBIRD complex subunit ZNF326	ZNF326	1.0348	0.98473	0.98108	0.91669	0.98775	0.9685	0.9878	1.0217	0.94455	0.93216	Q5BKZ1	16	16	16	DBIRD complex subunit ZNF326	ZNF326	sp|Q5BKZ1|ZN326_HUMAN DBIRD complex subunit ZNF326 OS=Homo sapiens OX=9606 GN=ZNF326 PE=1 SV=2	1	16	16	16	8	12	9	9	6	7	13	12	11	11	8	12	9	9	6	7	13	12	11	11	8	12	9	9	6	7
O75467;Q6AW86	Zinc finger protein 324A;Zinc finger protein 324B	ZNF324;ZNF324B	0.97799	1.0745	1.0388	1.2278	1.1446	1.1444	NaN	0.86916	NaN	NaN	O75467;Q6AW86	4;3	4;3	4;3	Zinc finger protein 324A;Zinc finger protein 324B	ZNF324;ZNF324B	sp|O75467|Z324A_HUMAN Zinc finger protein 324A OS=Homo sapiens OX=9606 GN=ZNF324 PE=2 SV=1;sp|Q6AW86|Z324B_HUMAN Zinc finger protein 324B OS=Homo sapiens OX=9606 GN=ZNF324B PE=1 SV=1	2	4	4	4	3	2	0	2	0	1	3	3	2	2	3	2	0	2	0	1	3	3	2	2	3	2	0	2	0	1
Q9P2F9	Zinc finger protein 319	ZNF319	NaN	NaN	NaN	0.98234	1.1621	0.98992	1.0505	1.1298	NaN	NaN	Q9P2F9	1	1	1	Zinc finger protein 319	ZNF319	sp|Q9P2F9|ZN319_HUMAN Zinc finger protein 319 OS=Homo sapiens OX=9606 GN=ZNF319 PE=1 SV=2	1	1	1	1	0	1	1	1	0	0	1	1	0	0	0	1	1	1	0	0	1	1	0	0	0	1	1	1	0	0
A6NFI3	Zinc finger protein 316	ZNF316	1.2615	0.50182	1.1403	0.93506	1.0522	1.0199	0.95431	0.34725	NaN	1.7983	A6NFI3	3	3	3	Zinc finger protein 316	ZNF316	sp|A6NFI3|ZN316_HUMAN Zinc finger protein 316 OS=Homo sapiens OX=9606 GN=ZNF316 PE=1 SV=1	1	3	3	3	1	2	1	2	0	1	2	2	1	2	1	2	1	2	0	1	2	2	1	2	1	2	1	2	0	1
Q9Y2X9	Zinc finger protein 281	ZNF281	0.84215	0.83923	1.2224	0.84152	0.75834	0.85291	0.90884	1.0612	0.88459	NaN	Q9Y2X9	6	6	6	Zinc finger protein 281	ZNF281	sp|Q9Y2X9|ZN281_HUMAN Zinc finger protein 281 OS=Homo sapiens OX=9606 GN=ZNF281 PE=1 SV=1	1	6	6	6	1	1	2	2	2	3	2	2	2	1	1	1	2	2	2	3	2	2	2	1	1	1	2	2	2	3
H0YL38;Q6N043	Zinc finger protein 280D	ZNF280D	NaN	NaN	NaN	NaN	NaN	NaN	NaN	NaN	1.5634	1.2656	H0YL38;Q6N043	6;5	4;3	4;3	Zinc finger protein 280D	ZNF280D	tr|H0YL38|H0YL38_HUMAN Zinc finger protein 280D OS=Homo sapiens OX=9606 GN=ZNF280D PE=1 SV=1;sp|Q6N043|Z280D_HUMAN Zinc finger protein 280D OS=Homo sapiens OX=9606 GN=ZNF280D PE=1 SV=3	2	6	4	4	1	1	1	1	3	3	2	2	2	2	0	0	0	0	3	3	0	0	0	0	0	0	0	0	3	3
Q8ND82	Zinc finger protein 280C	ZNF280C	1.1066	1.2009	1.1725	1.0338	0.96755	0.94543	0.73125	0.72359	1.2397	1.1324	Q8ND82	11	10	9	Zinc finger protein 280C	ZNF280C	sp|Q8ND82|Z280C_HUMAN Zinc finger protein 280C OS=Homo sapiens OX=9606 GN=ZNF280C PE=1 SV=1	1	11	10	9	3	4	3	4	3	5	5	6	4	5	2	3	2	3	3	5	4	5	3	4	2	3	2	3	3	5
Q9NRM2	Zinc finger protein 277	ZNF277	NaN	NaN	NaN	1.106	NaN	NaN	NaN	1.1178	NaN	NaN	Q9NRM2	2	2	2	Zinc finger protein 277	ZNF277	sp|Q9NRM2|ZN277_HUMAN Zinc finger protein 277 OS=Homo sapiens OX=9606 GN=ZNF277 PE=1 SV=2	1	2	2	2	0	1	1	1	0	0	0	0	1	0	0	1	1	1	0	0	0	0	1	0	0	1	1	1	0	0
P17028	Zinc finger protein 24	ZNF24	0.98694	0.89445	0.92944	0.93005	0.91798	0.98544	0.72802	0.85744	1.2958	1.1437	P17028	9	9	9	Zinc finger protein 24	ZNF24	sp|P17028|ZNF24_HUMAN Zinc finger protein 24 OS=Homo sapiens OX=9606 GN=ZNF24 PE=1 SV=4	1	9	9	9	5	4	5	5	4	3	5	6	4	7	5	4	5	5	4	3	5	6	4	7	5	4	5	5	4	3
P17026	Zinc finger protein 22	ZNF22	NaN	NaN	NaN	0.89	0.99349	0.98773	0.70786	1.2498	NaN	NaN	P17026	3	3	3	Zinc finger protein 22	ZNF22	sp|P17026|ZNF22_HUMAN Zinc finger protein 22 OS=Homo sapiens OX=9606 GN=ZNF22 PE=1 SV=3	1	3	3	3	0	1	1	2	0	0	1	3	0	0	0	1	1	2	0	0	1	3	0	0	0	1	1	2	0	0
O75362	Zinc finger protein 217	ZNF217	1.0054	0.87202	0.95638	0.92557	0.77973	0.86836	1.1176	1.0199	NaN	5.4061	O75362	3	3	3	Zinc finger protein 217	ZNF217	sp|O75362|ZN217_HUMAN Zinc finger protein 217 OS=Homo sapiens OX=9606 GN=ZNF217 PE=1 SV=1	1	3	3	3	1	2	2	1	1	2	2	2	1	2	1	2	2	1	1	2	2	2	1	2	1	2	2	1	1	2
O43670	BUB3-interacting and GLEBS motif-containing protein ZNF207	ZNF207	1.0123	1.0161	0.92985	0.92332	0.95981	0.9665	0.95636	0.96013	1.0192	1.0703	O43670	10	10	10	BUB3-interacting and GLEBS motif-containing protein ZNF207	ZNF207	sp|O43670|ZN207_HUMAN BUB3-interacting and GLEBS motif-containing protein ZNF207 OS=Homo sapiens OX=9606 GN=ZNF207 PE=1 SV=1	1	10	10	10	6	6	5	6	8	10	6	6	6	6	6	6	5	6	8	10	6	6	6	6	6	6	5	6	8	10
O15231	Zinc finger protein 185	ZNF185	0.86943	0.81292	0.94371	0.99706	0.90059	1.0022	1.7811	1.9016	1.1284	1.1788	O15231	15	15	15	Zinc finger protein 185	ZNF185	sp|O15231|ZN185_HUMAN Zinc finger protein 185 OS=Homo sapiens OX=9606 GN=ZNF185 PE=1 SV=3	1	15	15	15	8	10	5	5	5	6	3	4	3	3	8	10	5	5	5	6	3	4	3	3	8	10	5	5	5	6
Q99676	Zinc finger protein 184	ZNF184	1.0476	1.0432	1.1449	1.1183	1.0768	1.2307	0.91825	1.126	NaN	1.0729	Q99676	4	4	4	Zinc finger protein 184	ZNF184	sp|Q99676|ZN184_HUMAN Zinc finger protein 184 OS=Homo sapiens OX=9606 GN=ZNF184 PE=1 SV=4	1	4	4	4	2	1	2	2	1	1	2	2	2	1	2	1	2	2	1	1	2	2	2	1	2	1	2	2	1	1
P17020;Q8IVP9;Q13398;Q6P9A1	Zinc finger protein 16;Zinc finger protein 547;Zinc finger protein 211;Zinc finger protein 530	ZNF16;ZNF547;ZNF211;ZNF530	NaN	1.0087	0.90325	NaN	1.0228	1.0205	0.80428	0.81203	NaN	NaN	P17020;Q8IVP9;Q13398;Q6P9A1	2;1;1;1	2;1;1;1	2;1;1;1	Zinc finger protein 16;Zinc finger protein 547;Zinc finger protein 211;Zinc finger protein 530	ZNF16;ZNF547;ZNF211;ZNF530	sp|P17020|ZNF16_HUMAN Zinc finger protein 16 OS=Homo sapiens OX=9606 GN=ZNF16 PE=1 SV=3;sp|Q8IVP9|ZN547_HUMAN Zinc finger protein 547 OS=Homo sapiens OX=9606 GN=ZNF547 PE=2 SV=2;sp|Q13398|ZN211_HUMAN Zinc finger protein 211 OS=Homo sapiens OX=9606 GN=ZNF21	4	2	2	2	1	0	2	2	0	0	2	1	0	1	1	0	2	2	0	0	2	1	0	1	1	0	2	2	0	0
Q9UQR1	Zinc finger protein 148	ZNF148	0.26329	0.70188	0.81186	0.91364	0.72581	0.61366	1.0194	0.8406	1.6041	NaN	Q9UQR1	6	6	6	Zinc finger protein 148	ZNF148	sp|Q9UQR1|ZN148_HUMAN Zinc finger protein 148 OS=Homo sapiens OX=9606 GN=ZNF148 PE=1 SV=2	1	6	6	6	2	2	2	3	1	1	1	1	2	1	2	2	2	3	1	1	1	1	2	1	2	2	2	3	1	1
P52747	Zinc finger protein 143	ZNF143	1.0628	1.0454	1.0191	NaN	0.83862	0.97102	0.81899	1.1521	1.0769	NaN	P52747	5	5	5	Zinc finger protein 143	ZNF143	sp|P52747|ZN143_HUMAN Zinc finger protein 143 OS=Homo sapiens OX=9606 GN=ZNF143 PE=1 SV=2	1	5	5	5	4	0	4	3	1	1	3	2	3	4	4	0	4	3	1	1	3	2	3	4	4	0	4	3	1	1
P58317	Zinc finger protein 121	ZNF121	1.0821	1.0349	1.0239	1.0726	0.91731	1.015	0.88864	0.69661	1.3591	1.262	P58317	2	2	2	Zinc finger protein 121	ZNF121	sp|P58317|ZN121_HUMAN Zinc finger protein 121 OS=Homo sapiens OX=9606 GN=ZNF121 PE=3 SV=2	1	2	2	2	1	1	1	1	2	1	1	1	1	1	1	1	1	1	2	1	1	1	1	1	1	1	1	1	2	1
Q8NC26	Zinc finger protein 114	ZNF114	NaN	1.0672	NaN	NaN	NaN	NaN	NaN	NaN	NaN	NaN	Q8NC26	1	1	1	Zinc finger protein 114	ZNF114	sp|Q8NC26|ZN114_HUMAN Zinc finger protein 114 OS=Homo sapiens OX=9606 GN=ZNF114 PE=1 SV=1	1	1	1	1	0	0	0	0	0	0	0	0	0	1	0	0	0	0	0	0	0	0	0	1	0	0	0	0	0	0
Q9ULU4	Protein kinase C-binding protein 1	ZMYND8	0.97976	5.5932	0.84553	1.0106	1.1313	1.079	0.96148	1.1188	NaN	NaN	Q9ULU4	7	6	6	Protein kinase C-binding protein 1	ZMYND8	sp|Q9ULU4|PKCB1_HUMAN Protein kinase C-binding protein 1 OS=Homo sapiens OX=9606 GN=ZMYND8 PE=1 SV=2	1	7	6	6	2	5	3	1	0	1	3	3	1	3	2	5	3	1	0	1	3	3	1	2	2	5	3	1	0	1
Q5VZL5	Zinc finger MYM-type protein 4	ZMYM4	1.0744	1.0049	1.1872	1.1163	0.98522	1.1107	0.94837	0.82573	1.0728	NaN	Q5VZL5	5	5	5	Zinc finger MYM-type protein 4	ZMYM4	sp|Q5VZL5|ZMYM4_HUMAN Zinc finger MYM-type protein 4 OS=Homo sapiens OX=9606 GN=ZMYM4 PE=1 SV=1	1	5	5	5	2	1	2	2	2	0	2	2	2	2	2	1	2	2	2	0	2	2	2	2	2	1	2	2	2	0
Q14202	Zinc finger MYM-type protein 3	ZMYM3	0.96068	0.83814	1.0881	1.0706	0.6363	1.0689	0.98583	0.89777	0.40706	NaN	Q14202	7	7	7	Zinc finger MYM-type protein 3	ZMYM3	sp|Q14202|ZMYM3_HUMAN Zinc finger MYM-type protein 3 OS=Homo sapiens OX=9606 GN=ZMYM3 PE=1 SV=2	1	7	7	7	1	3	1	1	1	1	2	4	1	4	1	3	1	1	1	1	2	4	1	4	1	3	1	1	1	1
O75844	CAAX prenyl protease 1 homolog	ZMPSTE24	1.0104	1.0254	1.0101	0.97808	0.94709	1.0215	1.0694	1.1133	1.0164	0.97022	O75844	13	13	13	CAAX prenyl protease 1 homolog	ZMPSTE24	sp|O75844|FACE1_HUMAN CAAX prenyl protease 1 homolog OS=Homo sapiens OX=9606 GN=ZMPSTE24 PE=1 SV=2	1	13	13	13	8	8	7	7	10	10	8	8	8	8	8	8	7	7	10	10	8	8	8	8	8	8	7	7	10	10
Q8NF64;Q9ULJ6	Zinc finger MIZ domain-containing protein 2;Zinc finger MIZ domain-containing protein 1	ZMIZ2;ZMIZ1	NaN	1.0127	1.2134	NaN	0.82099	1.19	1.1902	1.0259	NaN	NaN	Q8NF64;Q9ULJ6	4;3	4;3	4;3	Zinc finger MIZ domain-containing protein 2;Zinc finger MIZ domain-containing protein 1	ZMIZ2;ZMIZ1	sp|Q8NF64|ZMIZ2_HUMAN Zinc finger MIZ domain-containing protein 2 OS=Homo sapiens OX=9606 GN=ZMIZ2 PE=1 SV=2;sp|Q9ULJ6|ZMIZ1_HUMAN Zinc finger MIZ domain-containing protein 1 OS=Homo sapiens OX=9606 GN=ZMIZ1 PE=1 SV=3	2	4	4	4	1	0	2	2	1	0	2	3	0	1	1	0	2	2	1	0	2	3	0	1	1	0	2	2	1	0
Q96NC0	Zinc finger matrin-type protein 2	ZMAT2	0.9943	1.0313	0.97666	0.93565	1.0634	0.95246	0.94331	0.87759	NaN	NaN	Q96NC0	3	3	3	Zinc finger matrin-type protein 2	ZMAT2	sp|Q96NC0|ZMAT2_HUMAN Zinc finger matrin-type protein 2 OS=Homo sapiens OX=9606 GN=ZMAT2 PE=1 SV=1	1	3	3	3	2	2	2	2	0	0	2	3	2	2	2	2	2	2	0	0	2	3	2	2	2	2	2	2	0	0
P17029	Zinc finger protein with KRAB and SCAN domains 1	ZKSCAN1	0.91211	0.97147	0.69717	0.69047	0.9745	0.7815	0.79582	0.73333	1.6783	2.0499	P17029	6	6	6	Zinc finger protein with KRAB and SCAN domains 1	ZKSCAN1	sp|P17029|ZKSC1_HUMAN Zinc finger protein with KRAB and SCAN domains 1 OS=Homo sapiens OX=9606 GN=ZKSCAN1 PE=1 SV=3	1	6	6	6	2	1	2	2	2	3	3	2	2	3	2	1	2	2	2	3	3	2	2	3	2	1	2	2	2	3
Q96T25	Zinc finger protein ZIC 5	ZIC5	0.70577	NaN	1.108	0.93024	0.84123	0.88322	NaN	1.0439	NaN	NaN	Q96T25	1	1	1	Zinc finger protein ZIC 5	ZIC5	sp|Q96T25|ZIC5_HUMAN Zinc finger protein ZIC 5 OS=Homo sapiens OX=9606 GN=ZIC5 PE=1 SV=2	1	1	1	1	1	1	0	1	0	0	1	1	1	0	1	1	0	1	0	0	1	1	1	0	1	1	0	1	0	0
Q8N5A5;V9GY48	Zinc finger CCCH-type with G patch domain-containing protein	ZGPAT	1.0832	0.99664	1.1317	0.84514	1.0485	1.0931	0.88286	0.88289	1.0153	NaN	Q8N5A5;V9GY48	6;5	6;5	6;5	Zinc finger CCCH-type with G patch domain-containing protein	ZGPAT	sp|Q8N5A5|ZGPAT_HUMAN Zinc finger CCCH-type with G patch domain-containing protein OS=Homo sapiens OX=9606 GN=ZGPAT PE=1 SV=3;tr|V9GY48|V9GY48_HUMAN Uncharacterized protein (Fragment) OS=Homo sapiens OX=9606 PE=4 SV=1	2	6	6	6	4	2	3	3	1	1	4	4	3	3	4	2	3	3	1	1	4	4	3	3	4	2	3	3	1	1
Q96K21	Abscission/NoCut checkpoint regulator	ZFYVE19	0.87924	0.56262	0.78368	0.90914	0.41089	0.61267	0.94916	0.7451	NaN	NaN	Q96K21	3	3	3	Abscission/NoCut checkpoint regulator	ZFYVE19	sp|Q96K21|ANCHR_HUMAN Abscission/NoCut checkpoint regulator OS=Homo sapiens OX=9606 GN=ZFYVE19 PE=1 SV=3	1	3	3	3	2	3	2	2	0	0	1	2	1	2	2	3	2	2	0	0	1	2	1	2	2	3	2	2	0	0
Q7Z3T8	Zinc finger FYVE domain-containing protein 16	ZFYVE16	0.78367	1.0103	0.92133	0.89865	0.84199	0.78395	1.0158	1.0973	NaN	NaN	Q7Z3T8	4	4	4	Zinc finger FYVE domain-containing protein 16	ZFYVE16	sp|Q7Z3T8|ZFY16_HUMAN Zinc finger FYVE domain-containing protein 16 OS=Homo sapiens OX=9606 GN=ZFYVE16 PE=1 SV=3	1	4	4	4	2	1	1	1	0	2	1	1	1	1	2	1	1	1	0	2	1	1	1	1	2	1	1	1	0	2
P08048;P17010	Zinc finger Y-chromosomal protein;Zinc finger X-chromosomal protein	ZFY;ZFX	0.91299	1.0112	0.90098	0.767	0.85703	0.97223	0.70817	0.7876	NaN	NaN	P08048;P17010	4;4	4;4	3;3	Zinc finger Y-chromosomal protein;Zinc finger X-chromosomal protein	ZFY;ZFX	sp|P08048|ZFY_HUMAN Zinc finger Y-chromosomal protein OS=Homo sapiens OX=9606 GN=ZFY PE=1 SV=3;sp|P17010|ZFX_HUMAN Zinc finger X-chromosomal protein OS=Homo sapiens OX=9606 GN=ZFX PE=2 SV=2	2	4	4	3	3	1	1	2	0	0	3	2	1	1	3	1	1	2	0	0	3	2	1	1	3	1	1	1	0	0
Q96KR1	Zinc finger RNA-binding protein	ZFR	0.96611	0.97071	0.97511	0.97639	0.90018	0.95627	0.86851	0.8822	0.74179	0.7733	Q96KR1	32	32	32	Zinc finger RNA-binding protein	ZFR	sp|Q96KR1|ZFR_HUMAN Zinc finger RNA-binding protein OS=Homo sapiens OX=9606 GN=ZFR PE=1 SV=2	1	32	32	32	18	16	18	14	10	13	14	17	20	17	18	16	18	14	10	13	14	17	20	17	18	16	18	14	10	13
O95159	Zinc finger protein-like 1	ZFPL1	0.95216	0.77619	0.96065	0.98013	1.1823	1.0509	0.87035	0.80715	1.0749	1.1277	O95159	4	4	4	Zinc finger protein-like 1	ZFPL1	sp|O95159|ZFPL1_HUMAN Zinc finger protein-like 1 OS=Homo sapiens OX=9606 GN=ZFPL1 PE=1 SV=2	1	4	4	4	3	3	3	3	1	1	3	3	3	3	3	3	3	3	1	1	3	3	3	3	3	3	3	3	1	1
A0A0A6YYC7;Q96JP5	E3 ubiquitin-protein ligase ZFP91	ZFP91-CNTF;ZFP91	0.96158	1.0172	1.148	1.0027	1.0007	1.2475	1.0097	0.8754	0.86241	4.364	A0A0A6YYC7;Q96JP5	6;6	6;6	6;6	E3 ubiquitin-protein ligase ZFP91	ZFP91-CNTF;ZFP91	tr|A0A0A6YYC7|A0A0A6YYC7_HUMAN HCG2042749, isoform CRA_d OS=Homo sapiens OX=9606 GN=ZFP91-CNTF PE=4 SV=1;sp|Q96JP5|ZFP91_HUMAN E3 ubiquitin-protein ligase ZFP91 OS=Homo sapiens OX=9606 GN=ZFP91 PE=1 SV=1	2	6	6	6	4	5	3	3	1	1	1	3	4	4	4	5	3	3	1	1	1	3	4	4	4	5	3	3	1	1
P47974	Zinc finger protein 36, C3H1 type-like 2	ZFP36L2	1.1365	1.008	1.1156	0.94441	1.1747	1.0029	1.1603	1.4365	NaN	NaN	P47974	5	4	4	Zinc finger protein 36, C3H1 type-like 2	ZFP36L2	sp|P47974|TISD_HUMAN mRNA decay activator protein ZFP36L2 OS=Homo sapiens OX=9606 GN=ZFP36L2 PE=1 SV=3	1	5	4	4	3	5	2	2	0	0	3	3	2	1	2	4	1	1	0	0	2	2	1	1	2	4	1	1	0	0
Q07352	Zinc finger protein 36, C3H1 type-like 1	ZFP36L1	0.65638	1.0845	0.62219	0.7706	0.86103	0.77998	0.58188	0.64731	0.99794	1.0247	Q07352	5	5	4	Zinc finger protein 36, C3H1 type-like 1	ZFP36L1	sp|Q07352|TISB_HUMAN mRNA decay activator protein ZFP36L1 OS=Homo sapiens OX=9606 GN=ZFP36L1 PE=1 SV=1	1	5	5	4	3	3	2	3	1	1	3	3	4	1	3	3	2	3	1	1	3	3	4	1	2	2	1	2	1	1
O76080	AN1-type zinc finger protein 5	ZFAND5	1.0198	1.087	NaN	0.75813	0.85246	0.99759	1.2759	1.5811	2.0236	1.3429	O76080	5	5	4	AN1-type zinc finger protein 5	ZFAND5	sp|O76080|ZFAN5_HUMAN AN1-type zinc finger protein 5 OS=Homo sapiens OX=9606 GN=ZFAND5 PE=1 SV=1	1	5	5	4	0	1	2	1	1	2	1	1	1	2	0	1	2	1	1	2	1	1	1	2	0	1	1	1	1	2
Q8WV99	AN1-type zinc finger protein 2B	ZFAND2B	1.0165	0.9795	NaN	0.83371	1.0486	NaN	NaN	NaN	NaN	NaN	Q8WV99	3	3	3	AN1-type zinc finger protein 2B	ZFAND2B	sp|Q8WV99|ZFN2B_HUMAN AN1-type zinc finger protein 2B OS=Homo sapiens OX=9606 GN=ZFAND2B PE=1 SV=1	1	3	3	3	0	2	0	0	0	0	1	0	1	1	0	2	0	0	0	0	1	0	1	1	0	2	0	0	0	0
Q8TCF1	AN1-type zinc finger protein 1	ZFAND1	1.2292	1.1572	1.0342	0.93852	1.2098	1.0926	1.7199	1.6572	0.84835	NaN	Q8TCF1	8	8	8	AN1-type zinc finger protein 1	ZFAND1	sp|Q8TCF1|ZFAN1_HUMAN AN1-type zinc finger protein 1 OS=Homo sapiens OX=9606 GN=ZFAND1 PE=1 SV=1	1	8	8	8	5	6	4	4	2	0	3	3	2	3	5	6	4	4	2	0	3	3	2	3	5	6	4	4	2	0
Q9C0B5	Palmitoyltransferase ZDHHC5	ZDHHC5	0.99274	0.94444	1.0311	0.98166	0.95506	1.0467	1.2179	1.1037	0.69178	NaN	Q9C0B5	4	4	4	Palmitoyltransferase ZDHHC5	ZDHHC5	sp|Q9C0B5|ZDHC5_HUMAN Palmitoyltransferase ZDHHC5 OS=Homo sapiens OX=9606 GN=ZDHHC5 PE=1 SV=2	1	4	4	4	2	1	2	2	3	1	2	1	1	1	2	1	2	2	3	1	2	1	1	1	2	1	2	2	3	1
Q5W0Z9	Probable palmitoyltransferase ZDHHC20	ZDHHC20	NaN	NaN	0.95237	1.1764	NaN	1.1812	NaN	2.2651	NaN	NaN	Q5W0Z9	3	3	3	Probable palmitoyltransferase ZDHHC20	ZDHHC20	sp|Q5W0Z9|ZDH20_HUMAN Palmitoyltransferase ZDHHC20 OS=Homo sapiens OX=9606 GN=ZDHHC20 PE=1 SV=1	1	3	3	3	1	1	0	1	0	1	0	2	0	0	1	1	0	1	0	1	0	2	0	0	1	1	0	1	0	1
Q9NUE0	Palmitoyltransferase ZDHHC18	ZDHHC18	0.99686	0.69611	0.62346	0.80485	0.74367	0.81264	1.0322	0.78886	NaN	NaN	Q9NUE0	1	1	1	Palmitoyltransferase ZDHHC18	ZDHHC18	sp|Q9NUE0|ZDH18_HUMAN Palmitoyltransferase ZDHHC18 OS=Homo sapiens OX=9606 GN=ZDHHC18 PE=1 SV=2	1	1	1	1	1	1	1	1	0	1	1	1	1	1	1	1	1	1	0	1	1	1	1	1	1	1	1	1	0	1
Q8IUH4	Palmitoyltransferase ZDHHC13	ZDHHC13	1.1641	1.2049	0.91839	1.4821	NaN	1.0358	1.32	1.0077	NaN	NaN	Q8IUH4	2	2	2	Palmitoyltransferase ZDHHC13	ZDHHC13	sp|Q8IUH4|ZDH13_HUMAN Palmitoyltransferase ZDHHC13 OS=Homo sapiens OX=9606 GN=ZDHHC13 PE=1 SV=3	1	2	2	2	1	2	1	1	0	0	0	1	1	2	1	2	1	1	0	0	0	1	1	2	1	2	1	1	0	0
Q8TBF4	Zinc finger CCHC-type and RNA-binding motif-containing protein 1	ZCRB1	1.0025	0.91397	0.92214	0.89673	1.0176	0.91335	0.96887	1.0825	1.0799	NaN	Q8TBF4	1	1	1	Zinc finger CCHC-type and RNA-binding motif-containing protein 1	ZCRB1	sp|Q8TBF4|ZCRB1_HUMAN Zinc finger CCHC-type and RNA-binding motif-containing protein 1 OS=Homo sapiens OX=9606 GN=ZCRB1 PE=1 SV=2	1	1	1	1	1	1	1	1	1	0	1	1	1	1	1	1	1	1	1	0	1	1	1	1	1	1	1	1	1	0
Q8N567	Zinc finger CCHC domain-containing protein 9	ZCCHC9	1.1302	NaN	NaN	NaN	1.5239	NaN	NaN	NaN	NaN	NaN	Q8N567	2	2	2	Zinc finger CCHC domain-containing protein 9	ZCCHC9	sp|Q8N567|ZCHC9_HUMAN Zinc finger CCHC domain-containing protein 9 OS=Homo sapiens OX=9606 GN=ZCCHC9 PE=1 SV=2	1	2	2	2	0	0	0	0	0	0	1	0	1	0	0	0	0	0	0	0	1	0	1	0	0	0	0	0	0	0
Q6NZY4	Zinc finger CCHC domain-containing protein 8	ZCCHC8	0.95014	0.97082	0.87324	0.96968	0.95833	0.85564	0.8338	0.87376	0.69958	0.39066	Q6NZY4	19	19	19	Zinc finger CCHC domain-containing protein 8	ZCCHC8	sp|Q6NZY4|ZCHC8_HUMAN Zinc finger CCHC domain-containing protein 8 OS=Homo sapiens OX=9606 GN=ZCCHC8 PE=1 SV=2	1	19	19	19	9	11	9	10	6	9	3	2	10	9	9	11	9	10	6	9	3	2	10	9	9	11	9	10	6	9
Q8N3Z6	Zinc finger CCHC domain-containing protein 7	ZCCHC7	0.83433	0.40709	1.0196	NaN	0.22981	0.17904	NaN	NaN	1.0478	1.0756	Q8N3Z6	5	5	5	Zinc finger CCHC domain-containing protein 7	ZCCHC7	sp|Q8N3Z6|ZCHC7_HUMAN Zinc finger CCHC domain-containing protein 7 OS=Homo sapiens OX=9606 GN=ZCCHC7 PE=1 SV=2	1	5	5	5	1	0	0	0	1	2	1	1	2	3	1	0	0	0	1	2	1	1	2	3	1	0	0	0	1	2
Q5VYS8	Terminal uridylyltransferase 7	ZCCHC6	0.73884	0.8015	1.07	0.89831	0.95616	0.94077	1.0166	0.88199	NaN	NaN	Q5VYS8	4	4	4	Terminal uridylyltransferase 7	ZCCHC6	sp|Q5VYS8|TUT7_HUMAN Terminal uridylyltransferase 7 OS=Homo sapiens OX=9606 GN=TUT7 PE=1 SV=1	1	4	4	4	1	2	2	2	1	0	2	2	2	1	1	2	2	2	1	0	2	2	2	1	1	2	2	2	1	0
Q9H5U6	Zinc finger CCHC domain-containing protein 4	ZCCHC4	1.0325	0.90196	NaN	3.9415	NaN	2.2172	NaN	0.85635	NaN	NaN	Q9H5U6	4	4	4	Zinc finger CCHC domain-containing protein 4	ZCCHC4	sp|Q9H5U6|ZCHC4_HUMAN Zinc finger CCHC domain-containing protein 4 OS=Homo sapiens OX=9606 GN=ZCCHC4 PE=1 SV=3	1	4	4	4	0	2	0	1	0	0	0	2	2	2	0	2	0	1	0	0	0	2	2	2	0	2	0	1	0	0
Q9NUD5	Zinc finger CCHC domain-containing protein 3	ZCCHC3	NaN	0.99591	NaN	1.1674	1.1591	1.0461	NaN	0.91649	NaN	NaN	Q9NUD5	3	3	3	Zinc finger CCHC domain-containing protein 3	ZCCHC3	sp|Q9NUD5|ZCHC3_HUMAN Zinc finger CCHC domain-containing protein 3 OS=Homo sapiens OX=9606 GN=ZCCHC3 PE=1 SV=1	1	3	3	3	0	1	0	1	0	1	2	1	0	1	0	1	0	1	0	1	2	1	0	1	0	1	0	1	0	1
Q9NQZ6	Zinc finger C4H2 domain-containing protein	ZC4H2	1.0119	0.99041	0.91462	0.91217	1.0174	1.0191	1.3617	0.98917	NaN	NaN	Q9NQZ6	1	1	1	Zinc finger C4H2 domain-containing protein	ZC4H2	sp|Q9NQZ6|ZC4H2_HUMAN Zinc finger C4H2 domain-containing protein OS=Homo sapiens OX=9606 GN=ZC4H2 PE=1 SV=1	1	1	1	1	1	1	1	1	0	0	1	1	1	1	1	1	1	1	0	0	1	1	1	1	1	1	1	1	0	0
Q86WB0	Nuclear-interacting partner of ALK	ZC3HC1	1.0011	0.74289	0.84839	0.90443	0.88865	0.85843	0.88436	0.7707	1.3898	1.8006	Q86WB0	8	8	8	Nuclear-interacting partner of ALK	ZC3HC1	sp|Q86WB0|NIPA_HUMAN Nuclear-interacting partner of ALK OS=Homo sapiens OX=9606 GN=ZC3HC1 PE=1 SV=1	1	8	8	8	5	3	4	4	4	3	5	2	4	3	5	3	4	4	4	3	5	2	4	3	5	3	4	4	4	3
Q96H79	Zinc finger CCCH-type antiviral protein 1-like	ZC3HAV1L	1.0745	NaN	NaN	NaN	NaN	NaN	NaN	0.59831	NaN	NaN	Q96H79	3	3	3	Zinc finger CCCH-type antiviral protein 1-like	ZC3HAV1L	sp|Q96H79|ZCCHL_HUMAN Zinc finger CCCH-type antiviral protein 1-like OS=Homo sapiens OX=9606 GN=ZC3HAV1L PE=1 SV=2	1	3	3	3	0	0	1	1	0	1	0	0	2	0	0	0	1	1	0	1	0	0	2	0	0	0	1	1	0	1
Q7Z2W4	Zinc finger CCCH-type antiviral protein 1	ZC3HAV1	0.99555	1.0405	0.98011	1.0464	1.0324	0.98919	1.0187	1.0018	1.0017	0.97846	Q7Z2W4	26	26	26	Zinc finger CCCH-type antiviral protein 1	ZC3HAV1	sp|Q7Z2W4|ZCCHV_HUMAN Zinc finger CCCH-type antiviral protein 1 OS=Homo sapiens OX=9606 GN=ZC3HAV1 PE=1 SV=3	1	26	26	26	20	21	19	22	13	13	20	17	21	20	20	21	19	22	13	13	20	17	21	20	20	21	19	22	13	13
Q8N5P1	Zinc finger CCCH domain-containing protein 8	ZC3H8	0.92141	0.76022	0.6293	NaN	0.59333	0.49185	NaN	0.65732	NaN	NaN	Q8N5P1	3	3	3	Zinc finger CCCH domain-containing protein 8	ZC3H8	sp|Q8N5P1|ZC3H8_HUMAN Zinc finger CCCH domain-containing protein 8 OS=Homo sapiens OX=9606 GN=ZC3H8 PE=1 SV=2	1	3	3	3	1	0	0	1	0	1	1	1	2	1	1	0	0	1	0	1	1	1	2	1	1	0	0	1	0	1
Q9UGR2	Zinc finger CCCH domain-containing protein 7B	ZC3H7B	1.035	1.1042	1.0541	1.106	1.0729	1.0376	0.93865	0.99735	NaN	NaN	Q9UGR2	7	7	7	Zinc finger CCCH domain-containing protein 7B	ZC3H7B	sp|Q9UGR2|Z3H7B_HUMAN Zinc finger CCCH domain-containing protein 7B OS=Homo sapiens OX=9606 GN=ZC3H7B PE=1 SV=1	1	7	7	7	6	4	4	5	0	0	5	3	5	6	6	4	4	5	0	0	5	3	5	6	6	4	4	5	0	0
Q8IWR0	Zinc finger CCCH domain-containing protein 7A	ZC3H7A	0.8303	0.92827	NaN	0.86735	0.97766	NaN	3.1703	NaN	NaN	NaN	Q8IWR0	2	2	2	Zinc finger CCCH domain-containing protein 7A	ZC3H7A	sp|Q8IWR0|Z3H7A_HUMAN Zinc finger CCCH domain-containing protein 7A OS=Homo sapiens OX=9606 GN=ZC3H7A PE=1 SV=1	1	2	2	2	0	1	1	0	0	0	1	0	1	1	0	1	1	0	0	0	1	0	1	1	0	1	1	0	0	0
Q9UPT8	Zinc finger CCCH domain-containing protein 4	ZC3H4	1.0129	0.96213	0.80312	0.79123	1.0025	0.80706	1.3645	0.94889	0.80926	0.58929	Q9UPT8	9	9	9	Zinc finger CCCH domain-containing protein 4	ZC3H4	sp|Q9UPT8|ZC3H4_HUMAN Zinc finger CCCH domain-containing protein 4 OS=Homo sapiens OX=9606 GN=ZC3H4 PE=1 SV=3	1	9	9	9	6	4	2	3	3	2	3	3	2	3	6	4	2	3	3	2	3	3	2	3	6	4	2	3	3	2
Q8IXZ2	Zinc finger CCCH domain-containing protein 3	ZC3H3	0.70967	0.83734	0.6585	0.85739	0.78578	0.82927	0.71835	0.62374	NaN	NaN	Q8IXZ2	2	2	2	Zinc finger CCCH domain-containing protein 3	ZC3H3	sp|Q8IXZ2|ZC3H3_HUMAN Zinc finger CCCH domain-containing protein 3 OS=Homo sapiens OX=9606 GN=ZC3H3 PE=1 SV=3	1	2	2	2	1	1	1	1	0	0	1	1	2	1	1	1	1	1	0	0	1	1	2	1	1	1	1	1	0	0
Q86VM9	Zinc finger CCCH domain-containing protein 18	ZC3H18	1.1421	1.0252	1.069	1.0252	0.92767	0.97599	0.99132	0.95721	0.88702	0.90838	Q86VM9	11	11	11	Zinc finger CCCH domain-containing protein 18	ZC3H18	sp|Q86VM9|ZCH18_HUMAN Zinc finger CCCH domain-containing protein 18 OS=Homo sapiens OX=9606 GN=ZC3H18 PE=1 SV=2	1	11	11	11	4	4	5	5	3	4	4	4	4	3	4	4	5	5	3	4	4	4	4	3	4	4	5	5	3	4
Q8WU90	Zinc finger CCCH domain-containing protein 15	ZC3H15	0.95796	0.98087	0.99062	0.94631	0.89421	0.94893	0.86985	0.82983	0.93465	0.92761	Q8WU90	20	20	20	Zinc finger CCCH domain-containing protein 15	ZC3H15	sp|Q8WU90|ZC3HF_HUMAN Zinc finger CCCH domain-containing protein 15 OS=Homo sapiens OX=9606 GN=ZC3H15 PE=1 SV=1	1	20	20	20	12	13	13	12	7	9	12	12	12	15	12	13	13	12	7	9	12	12	12	15	12	13	13	12	7	9
Q6PJT7	Zinc finger CCCH domain-containing protein 14	ZC3H14	0.98828	0.93793	0.9688	0.95211	0.944	1.0127	0.94647	0.9392	1.0702	1.077	Q6PJT7	31	31	31	Zinc finger CCCH domain-containing protein 14	ZC3H14	sp|Q6PJT7|ZC3HE_HUMAN Zinc finger CCCH domain-containing protein 14 OS=Homo sapiens OX=9606 GN=ZC3H14 PE=1 SV=1	1	31	31	31	19	17	18	17	12	14	19	18	21	20	19	17	18	17	12	14	19	18	21	20	19	17	18	17	12	14
Q5T200	Zinc finger CCCH domain-containing protein 13	ZC3H13	1.0151	0.86601	1.0113	0.86152	0.89821	0.95741	0.98256	0.99524	0.94938	0.90993	Q5T200	12	12	12	Zinc finger CCCH domain-containing protein 13	ZC3H13	sp|Q5T200|ZC3HD_HUMAN Zinc finger CCCH domain-containing protein 13 OS=Homo sapiens OX=9606 GN=ZC3H13 PE=1 SV=1	1	12	12	12	1	3	3	5	5	4	2	2	6	4	1	3	3	5	5	4	2	2	6	4	1	3	3	5	5	4
O75152;A0A1B0GTU1	Zinc finger CCCH domain-containing protein 11A	ZC3H11A	0.98742	1.0765	1.0465	0.99353	1.1405	1.032	1.1809	1.0885	1.1145	1.1044	O75152	17;3	17;3	17;3	Zinc finger CCCH domain-containing protein 11A	ZC3H11A	sp|O75152|ZC11A_HUMAN Zinc finger CCCH domain-containing protein 11A OS=Homo sapiens OX=9606 GN=ZC3H11A PE=1 SV=3	2	17	17	17	10	9	9	9	5	5	9	9	8	11	10	9	9	9	5	5	9	9	8	11	10	9	9	9	5	5
Q96GY0	Zinc finger C2HC domain-containing protein 1A	ZC2HC1A	1.0586	1.0484	1.0442	0.98467	1.0719	1.0431	1.4121	1.3849	NaN	1.1956	Q96GY0	11	11	11	Zinc finger C2HC domain-containing protein 1A	ZC2HC1A	sp|Q96GY0|ZC21A_HUMAN Zinc finger C2HC domain-containing protein 1A OS=Homo sapiens OX=9606 GN=ZC2HC1A PE=1 SV=2	1	11	11	11	7	7	4	6	1	5	7	6	4	4	7	7	4	6	1	5	7	6	4	4	7	7	4	6	1	5
Q96C00	Zinc finger and BTB domain-containing protein 9	ZBTB9	NaN	0.89228	0.83591	0.90297	1.252	1.0326	1.0639	0.86185	NaN	NaN	Q96C00	3	3	3	Zinc finger and BTB domain-containing protein 9	ZBTB9	sp|Q96C00|ZBTB9_HUMAN Zinc finger and BTB domain-containing protein 9 OS=Homo sapiens OX=9606 GN=ZBTB9 PE=1 SV=1	1	3	3	3	1	2	1	1	0	0	1	1	0	1	1	2	1	1	0	0	1	1	0	1	1	2	1	1	0	0
O15156	Zinc finger and BTB domain-containing protein 7B	ZBTB7B	NaN	0.93195	1.0362	1.2732	1.2538	NaN	1.1383	1.4197	NaN	NaN	O15156	1	1	1	Zinc finger and BTB domain-containing protein 7B	ZBTB7B	sp|O15156|ZBT7B_HUMAN Zinc finger and BTB domain-containing protein 7B OS=Homo sapiens OX=9606 GN=ZBTB7B PE=1 SV=2	1	1	1	1	1	1	1	1	0	0	1	0	0	1	1	1	1	1	0	0	1	0	0	1	1	1	1	1	0	0
O95365	Zinc finger and BTB domain-containing protein 7A	ZBTB7A	0.90627	1.0813	1.1483	0.98963	1.0367	1.1257	1.171	1.4584	0.74693	NaN	O95365	6	6	6	Zinc finger and BTB domain-containing protein 7A	ZBTB7A	sp|O95365|ZBT7A_HUMAN Zinc finger and BTB domain-containing protein 7A OS=Homo sapiens OX=9606 GN=ZBTB7A PE=1 SV=1	1	6	6	6	5	5	4	4	2	0	2	4	4	5	5	5	4	4	2	0	2	4	4	5	5	5	4	4	2	0
Q9ULJ3	Zinc finger and BTB domain-containing protein 21	ZBTB21	1.1274	NaN	NaN	1.1261	1.1023	NaN	0.49328	0.75551	1.0022	0.84999	Q9ULJ3	5	5	5	Zinc finger and BTB domain-containing protein 21	ZBTB21	sp|Q9ULJ3|ZBT21_HUMAN Zinc finger and BTB domain-containing protein 21 OS=Homo sapiens OX=9606 GN=ZBTB21 PE=1 SV=2	1	5	5	5	0	1	2	1	1	2	1	0	1	0	0	1	2	1	1	2	1	0	1	0	0	1	2	1	1	2
O95625	Zinc finger and BTB domain-containing protein 11	ZBTB11	0.98608	1.0046	1.0779	NaN	1.0918	1.1692	1.0428	0.88801	0.86707	NaN	O95625	5	5	5	Zinc finger and BTB domain-containing protein 11	ZBTB11	sp|O95625|ZBT11_HUMAN Zinc finger and BTB domain-containing protein 11 OS=Homo sapiens OX=9606 GN=ZBTB11 PE=1 SV=2	1	5	5	5	2	0	3	3	1	0	2	1	1	1	2	0	3	3	1	0	2	1	1	1	2	0	3	3	1	0
Q96DT7	Zinc finger and BTB domain-containing protein 10	ZBTB10	NaN	NaN	NaN	NaN	0.94559	0.74781	NaN	NaN	NaN	NaN	Q96DT7	1	1	1	Zinc finger and BTB domain-containing protein 10	ZBTB10	sp|Q96DT7|ZBT10_HUMAN Zinc finger and BTB domain-containing protein 10 OS=Homo sapiens OX=9606 GN=ZBTB10 PE=1 SV=2	1	1	1	1	0	0	0	0	0	0	1	1	0	0	0	0	0	0	0	0	1	1	0	0	0	0	0	0	0	0
Q9NYL2	Mitogen-activated protein kinase kinase kinase MLT	ZAK	1.4676	1.0547	0.95455	1.0142	0.94209	0.93988	1.0058	0.88431	NaN	NaN	Q9NYL2	3	3	3	Mitogen-activated protein kinase kinase kinase MLT	ZAK	sp|Q9NYL2|M3K20_HUMAN Mitogen-activated protein kinase kinase kinase 20 OS=Homo sapiens OX=9606 GN=MAP3K20 PE=1 SV=3	1	3	3	3	2	2	2	2	0	0	2	1	3	2	2	2	2	2	0	0	2	1	3	2	2	2	2	2	0	0
P25490;Q96MM3	Transcriptional repressor protein YY1	YY1	1.0042	1.1595	1.0356	0.99057	0.79619	0.94181	0.85716	0.92069	1.1307	1.0587	P25490	11;2	11;2	7;1	Transcriptional repressor protein YY1	YY1	sp|P25490|TYY1_HUMAN Transcriptional repressor protein YY1 OS=Homo sapiens OX=9606 GN=YY1 PE=1 SV=2	2	11	11	7	7	4	6	5	6	7	5	7	8	4	7	4	6	5	6	7	5	7	8	4	4	2	3	2	4	4
P63104	14-3-3 protein zeta/delta	YWHAZ	1.0168	1.0169	0.95004	0.99525	1.1004	1.0853	1.1382	1.1254	0.89247	0.88683	P63104	34	34	27	14-3-3 protein zeta/delta	YWHAZ	sp|P63104|1433Z_HUMAN 14-3-3 protein zeta/delta OS=Homo sapiens OX=9606 GN=YWHAZ PE=1 SV=1	1	34	34	27	21	20	21	20	32	34	21	21	20	21	21	20	21	20	32	34	21	21	20	21	14	14	14	14	26	27
P27348	14-3-3 protein theta	YWHAQ	1.0133	1.0287	1.0148	1.0276	1.0134	1.0325	0.91057	0.93936	1.1831	1.2032	P27348	29	24	24	14-3-3 protein theta	YWHAQ	sp|P27348|1433T_HUMAN 14-3-3 protein theta OS=Homo sapiens OX=9606 GN=YWHAQ PE=1 SV=1	1	29	24	24	18	18	16	17	24	27	17	17	18	19	13	13	11	12	19	22	12	12	13	14	13	13	11	12	19	22
Q04917;REV__Q7Z5H3;REV__P13521	14-3-3 protein eta	YWHAH	1.0485	1.0222	1.027	1.0251	1.0141	0.98419	1.0532	1.0821	0.87102	0.88115	Q04917	24;1;1	20;1;1	20;1;1	14-3-3 protein eta	YWHAH	sp|Q04917|1433F_HUMAN 14-3-3 protein eta OS=Homo sapiens OX=9606 GN=YWHAH PE=1 SV=4	3	24	20	20	16	14	15	15	19	20	16	15	12	15	12	11	11	12	15	16	12	11	9	11	12	11	11	12	15	16
P61981	14-3-3 protein gamma;14-3-3 protein gamma, N-terminally processed	YWHAG	1.0605	1.06	1.0296	1.0173	1.0749	1.1333	1.1291	1.1618	0.9489	0.93023	P61981	27	23	21	14-3-3 protein gamma;14-3-3 protein gamma, N-terminally processed	YWHAG	sp|P61981|1433G_HUMAN 14-3-3 protein gamma OS=Homo sapiens OX=9606 GN=YWHAG PE=1 SV=2	1	27	23	21	12	11	13	10	23	24	11	14	13	13	8	8	9	7	19	20	7	10	10	9	7	7	8	6	17	18
P62258	14-3-3 protein epsilon	YWHAE	1.0263	1.0373	1.0361	1.0493	1.0591	1.0614	1.0226	1.051	0.86023	0.85939	P62258	30	27	27	14-3-3 protein epsilon	YWHAE	sp|P62258|1433E_HUMAN 14-3-3 protein epsilon OS=Homo sapiens OX=9606 GN=YWHAE PE=1 SV=1	1	30	27	27	19	18	19	19	26	28	19	19	20	18	16	15	16	16	23	25	16	16	17	15	16	15	16	16	23	25
P31946	14-3-3 protein beta/alpha;14-3-3 protein beta/alpha, N-terminally processed	YWHAB	1.0252	1.0826	0.97753	1.0014	1.0646	1.0674	1.1441	1.1767	0.99296	0.99778	P31946	24	17	17	14-3-3 protein beta/alpha;14-3-3 protein beta/alpha, N-terminally processed	YWHAB	sp|P31946|1433B_HUMAN 14-3-3 protein beta/alpha OS=Homo sapiens OX=9606 GN=YWHAB PE=1 SV=3	1	24	17	17	14	12	11	13	23	20	12	12	14	11	8	6	5	7	16	13	6	6	8	5	8	6	5	7	16	13
Q7Z739	YTH domain-containing family protein 3	YTHDF3	0.98231	0.96164	0.90223	0.83979	1.0124	0.90168	0.87085	0.82142	1.1929	1.1509	Q7Z739	19	16	11	YTH domain-containing family protein 3	YTHDF3	sp|Q7Z739|YTHD3_HUMAN YTH domain-containing family protein 3 OS=Homo sapiens OX=9606 GN=YTHDF3 PE=1 SV=1	1	19	16	11	12	13	15	14	7	7	12	12	14	15	10	10	12	11	6	5	10	9	11	12	8	8	10	9	3	1
Q9Y5A9	YTH domain-containing family protein 2	YTHDF2	0.92756	1.0111	0.94699	0.93925	0.95889	0.99447	0.90197	0.88243	1.1905	1.1527	Q9Y5A9	21	21	17	YTH domain-containing family protein 2	YTHDF2	sp|Q9Y5A9|YTHD2_HUMAN YTH domain-containing family protein 2 OS=Homo sapiens OX=9606 GN=YTHDF2 PE=1 SV=2	1	21	21	17	10	11	11	13	14	14	9	12	10	12	10	11	11	13	14	14	9	12	10	12	7	7	7	9	13	12
Q9BYJ9	YTH domain-containing family protein 1	YTHDF1	0.83877	NaN	NaN	NaN	1.1217	1.7655	NaN	0.73084	0.72173	1.1037	Q9BYJ9	12	4	4	YTH domain-containing family protein 1	YTHDF1	sp|Q9BYJ9|YTHD1_HUMAN YTH domain-containing family protein 1 OS=Homo sapiens OX=9606 GN=YTHDF1 PE=1 SV=1	1	12	4	4	5	6	6	6	6	10	5	6	6	6	1	1	1	1	2	4	1	1	1	1	1	1	1	1	2	4
Q9H6S0	Probable ATP-dependent RNA helicase YTHDC2	YTHDC2	0.94124	0.87903	0.8239	1.1027	0.98953	0.7335	0.88558	0.91566	0.60379	0.67236	Q9H6S0	18	18	18	Probable ATP-dependent RNA helicase YTHDC2	YTHDC2	sp|Q9H6S0|YTDC2_HUMAN 3-5 RNA helicase YTHDC2 OS=Homo sapiens OX=9606 GN=YTHDC2 PE=1 SV=2	1	18	18	18	8	6	7	7	2	6	6	5	7	7	8	6	7	7	2	6	6	5	7	7	8	6	7	7	2	6
Q96MU7	YTH domain-containing protein 1	YTHDC1	0.99963	0.94563	0.95347	1.0171	0.90883	0.9914	0.87811	0.91522	1.3896	2.5611	Q96MU7	11	11	11	YTH domain-containing protein 1	YTHDC1	sp|Q96MU7|YTDC1_HUMAN YTH domain-containing protein 1 OS=Homo sapiens OX=9606 GN=YTHDC1 PE=1 SV=3	1	11	11	11	7	7	8	8	6	4	9	5	8	7	7	7	8	8	6	4	9	5	8	7	7	7	8	8	6	4
Q86U90	YrdC domain-containing protein, mitochondrial	YRDC	0.95417	0.98494	1.0164	0.94417	0.98441	0.86773	0.88357	0.93639	0.92278	0.82033	Q86U90	12	12	12	YrdC domain-containing protein, mitochondrial	YRDC	sp|Q86U90|YRDC_HUMAN YrdC domain-containing protein, mitochondrial OS=Homo sapiens OX=9606 GN=YRDC PE=1 SV=1	1	12	12	12	7	7	6	8	3	3	6	7	7	9	7	7	6	8	3	3	6	7	7	9	7	7	6	8	3	3
Q96TA2	ATP-dependent zinc metalloprotease YME1L1	YME1L1	0.9418	0.98516	1.0002	1.0268	1.0255	1.0109	0.84314	0.82838	1.1463	1.1139	Q96TA2	18	18	18	ATP-dependent zinc metalloprotease YME1L1	YME1L1	sp|Q96TA2|YMEL1_HUMAN ATP-dependent zinc metalloprotease YME1L1 OS=Homo sapiens OX=9606 GN=YME1L1 PE=1 SV=2	1	18	18	18	11	10	10	12	3	2	12	10	11	11	11	10	10	12	3	2	12	10	11	11	11	10	10	12	3	2
P49750	YLP motif-containing protein 1	YLPM1	1.0285	0.98102	1.0737	1.0045	0.94419	0.93628	0.59855	0.59706	1.1411	1.2392	P49750	46	46	46	YLP motif-containing protein 1	YLPM1	sp|P49750|YLPM1_HUMAN YLP motif-containing protein 1 OS=Homo sapiens OX=9606 GN=YLPM1 PE=1 SV=4	1	46	46	46	11	8	19	15	20	17	22	22	23	24	11	8	19	15	20	17	22	22	23	24	11	8	19	15	20	17
O15498	Synaptobrevin homolog YKT6	YKT6	0.98083	1.0112	1.0627	1.0998	1.0294	1.0047	0.91559	1.1124	1.0089	0.94781	O15498	10	10	10	Synaptobrevin homolog YKT6	YKT6	sp|O15498|YKT6_HUMAN Synaptobrevin homolog YKT6 OS=Homo sapiens OX=9606 GN=YKT6 PE=1 SV=1	1	10	10	10	5	8	6	6	4	2	5	5	6	6	5	8	6	6	4	2	5	5	6	6	5	8	6	6	4	2
Q96EC8	Protein YIPF6	YIPF6	0.67893	NaN	0.80831	0.82563	0.71986	0.79302	0.93094	0.80785	NaN	NaN	Q96EC8	2	2	2	Protein YIPF6	YIPF6	sp|Q96EC8|YIPF6_HUMAN Protein YIPF6 OS=Homo sapiens OX=9606 GN=YIPF6 PE=1 SV=2	1	2	2	2	1	2	1	2	0	0	1	1	1	1	1	2	1	2	0	0	1	1	1	1	1	2	1	2	0	0
Q969M3	Protein YIPF5	YIPF5	0.67439	NaN	0.52262	0.75459	0.62304	NaN	NaN	0.36071	NaN	0.96252	Q969M3	2	2	2	Protein YIPF5	YIPF5	sp|Q969M3|YIPF5_HUMAN Protein YIPF5 OS=Homo sapiens OX=9606 GN=YIPF5 PE=1 SV=1	1	2	2	2	1	1	0	1	1	1	1	0	2	0	1	1	0	1	1	1	1	0	2	0	1	1	0	1	1	1
Q9BSR8	Protein YIPF4	YIPF4	1.1724	1.351	0.99545	NaN	1.0623	0.91917	1.1482	NaN	NaN	NaN	Q9BSR8	1	1	1	Protein YIPF4	YIPF4	sp|Q9BSR8|YIPF4_HUMAN Protein YIPF4 OS=Homo sapiens OX=9606 GN=YIPF4 PE=1 SV=1	1	1	1	1	1	0	1	0	0	0	1	1	1	1	1	0	1	0	0	0	1	1	1	1	1	0	1	0	0	0
Q9GZM5	Protein YIPF3;Protein YIPF3, 36 kDa form III	YIPF3	0.9676	1.0435	0.94953	0.93292	1.0065	1.0155	0.95324	0.93007	NaN	NaN	Q9GZM5	5	5	5	Protein YIPF3;Protein YIPF3, 36 kDa form III	YIPF3	sp|Q9GZM5|YIPF3_HUMAN Protein YIPF3 OS=Homo sapiens OX=9606 GN=YIPF3 PE=1 SV=1	1	5	5	5	4	2	3	3	0	0	3	3	2	3	4	2	3	3	0	0	3	3	2	3	4	2	3	3	0	0
Q9BWQ6	Protein YIPF2	YIPF2	NaN	NaN	NaN	NaN	NaN	NaN	NaN	NaN	0.82401	0.85881	Q9BWQ6	1	1	1	Protein YIPF2	YIPF2	sp|Q9BWQ6|YIPF2_HUMAN Protein YIPF2 OS=Homo sapiens OX=9606 GN=YIPF2 PE=1 SV=1	1	1	1	1	0	0	0	0	1	1	0	0	0	0	0	0	0	0	1	1	0	0	0	0	0	0	0	0	1	1
Q5BJH7	Protein YIF1B	YIF1B	0.99724	1.0095	0.96097	0.93715	0.88315	0.88061	0.8422	0.96036	1.1609	1.1156	Q5BJH7	3	3	3	Protein YIF1B	YIF1B	sp|Q5BJH7|YIF1B_HUMAN Protein YIF1B OS=Homo sapiens OX=9606 GN=YIF1B PE=1 SV=1	1	3	3	3	2	2	2	2	3	2	2	3	2	2	2	2	2	2	3	2	2	3	2	2	2	2	2	2	3	2
O95070	Protein YIF1A	YIF1A	1.0478	1.0625	0.91795	1.0999	1.0157	1.0258	1.0851	0.97337	0.78992	NaN	O95070	1	1	1	Protein YIF1A	YIF1A	sp|O95070|YIF1A_HUMAN Protein YIF1A OS=Homo sapiens OX=9606 GN=YIF1A PE=1 SV=2	1	1	1	1	1	1	1	1	1	1	1	1	1	1	1	1	1	1	1	1	1	1	1	1	1	1	1	1	1	1
P07947;P06241;P08631;P06239;P09769	Tyrosine-protein kinase Yes	YES1	1.007	0.9957	1.0093	0.99899	0.98748	0.96139	1.0345	1.0804	1.2507	1.1578	P07947	16;3;2;1;1	16;3;2;1;1	10;1;0;0;1	Tyrosine-protein kinase Yes	YES1	sp|P07947|YES_HUMAN Tyrosine-protein kinase Yes OS=Homo sapiens OX=9606 GN=YES1 PE=1 SV=3	5	16	16	10	12	10	12	11	6	4	10	11	10	9	12	10	12	11	6	4	10	11	10	9	8	7	9	8	4	3
O95619	YEATS domain-containing protein 4	YEATS4	NaN	NaN	NaN	NaN	NaN	NaN	NaN	NaN	NaN	0.93611	O95619	1	1	1	YEATS domain-containing protein 4	YEATS4	sp|O95619|YETS4_HUMAN YEATS domain-containing protein 4 OS=Homo sapiens OX=9606 GN=YEATS4 PE=1 SV=1	1	1	1	1	0	0	0	0	0	1	0	0	0	0	0	0	0	0	0	1	0	0	0	0	0	0	0	0	0	1
P16989	Y-box-binding protein 3	YBX3	0.97865	0.94206	0.98441	0.90942	0.87853	0.94064	1.3092	1.2587	1.0158	1.1506	P16989	31	31	23	Y-box-binding protein 3	YBX3	sp|P16989|YBOX3_HUMAN Y-box-binding protein 3 OS=Homo sapiens OX=9606 GN=YBX3 PE=1 SV=4	1	31	31	23	19	21	18	16	21	19	21	21	15	15	19	21	18	16	21	19	21	21	15	15	16	18	15	13	13	11
P67809;Q9Y2T7	Nuclease-sensitive element-binding protein 1	YBX1	0.92968	0.93369	0.93921	0.84277	0.85372	0.88857	0.58508	0.59768	0.70124	0.69195	P67809	28;6	20;0	20;0	Nuclease-sensitive element-binding protein 1	YBX1	sp|P67809|YBOX1_HUMAN Nuclease-sensitive element-binding protein 1 OS=Homo sapiens OX=9606 GN=YBX1 PE=1 SV=3	2	28	20	20	14	16	16	15	24	23	13	12	16	17	11	13	13	12	16	15	10	9	13	14	11	13	13	12	16	15
P58557	Putative ribonuclease	YBEY	1.0345	0.97979	1.0371	1.1297	1.1032	1.0505	1.0001	0.7605	NaN	1.1158	P58557	2	2	2	Putative ribonuclease	YBEY	sp|P58557|YBEY_HUMAN Endoribonuclease YbeY OS=Homo sapiens OX=9606 GN=YBEY PE=1 SV=2	1	2	2	2	1	1	2	1	0	1	1	1	2	1	1	1	2	1	0	1	1	1	2	1	1	1	2	1	0	1
Q9Y2Z4	Tyrosine--tRNA ligase, mitochondrial	YARS2	0.95675	0.98642	0.95208	0.64664	0.99437	0.82574	0.69915	0.82228	1.2465	1.1327	Q9Y2Z4	13	13	13	Tyrosine--tRNA ligase, mitochondrial	YARS2	sp|Q9Y2Z4|SYYM_HUMAN Tyrosine--tRNA ligase, mitochondrial OS=Homo sapiens OX=9606 GN=YARS2 PE=1 SV=2	1	13	13	13	5	4	4	6	7	6	6	7	8	7	5	4	4	6	7	6	6	7	8	7	5	4	4	6	7	6
P54577	Tyrosine--tRNA ligase, cytoplasmic;Tyrosine--tRNA ligase, cytoplasmic, N-terminally processed	YARS	1.05	1.0091	0.97658	1.0018	1.0104	1.0238	1.0888	1.0709	0.78778	0.81364	P54577	56	56	56	Tyrosine--tRNA ligase, cytoplasmic;Tyrosine--tRNA ligase, cytoplasmic, N-terminally processed	YARS	sp|P54577|SYYC_HUMAN Tyrosine--tRNA ligase, cytoplasmic OS=Homo sapiens OX=9606 GN=YARS PE=1 SV=4	1	56	56	56	32	31	29	31	40	37	33	35	31	31	32	31	29	31	40	37	33	35	31	31	32	31	29	31	40	37
P46937;Q86UL8	Transcriptional coactivator YAP1	YAP1	0.90424	0.89964	0.9673	0.84992	0.74493	0.80904	1.0843	1.0639	0.92653	0.94313	P46937	14;1	14;1	13;0	Transcriptional coactivator YAP1	YAP1	sp|P46937|YAP1_HUMAN Transcriptional coactivator YAP1 OS=Homo sapiens OX=9606 GN=YAP1 PE=1 SV=2	2	14	14	13	10	8	8	7	7	8	8	6	10	10	10	8	8	7	7	8	8	6	10	10	9	8	7	6	7	8
Q8IY57	YY1-associated factor 2	YAF2	1.137	0.89061	1.3308	NaN	0.83743	0.96	1.0993	1.2094	NaN	NaN	Q8IY57	2	2	2	YY1-associated factor 2	YAF2	sp|Q8IY57|YAF2_HUMAN YY1-associated factor 2 OS=Homo sapiens OX=9606 GN=YAF2 PE=1 SV=3	1	2	2	2	2	0	1	2	0	0	2	2	2	2	2	0	1	2	0	0	2	2	2	2	2	0	1	2	0	0
Q9H0D6	5-3 exoribonuclease 2	XRN2	0.95716	0.94253	0.89477	0.94251	0.93764	0.86	0.8545	0.845	1.0725	1.0499	Q9H0D6	46	46	46	5-3 exoribonuclease 2	XRN2	sp|Q9H0D6|XRN2_HUMAN 5-3 exoribonuclease 2 OS=Homo sapiens OX=9606 GN=XRN2 PE=1 SV=1	1	46	46	46	27	30	29	26	21	22	29	32	29	28	27	30	29	26	21	22	29	32	29	28	27	30	29	26	21	22
Q8IZH2	5-3 exoribonuclease 1	XRN1	0.83487	0.76164	1.119	1.1551	0.74681	1.2552	1.2623	1.3072	0.72463	NaN	Q8IZH2	8	8	8	5-3 exoribonuclease 1	XRN1	sp|Q8IZH2|XRN1_HUMAN 5-3 exoribonuclease 1 OS=Homo sapiens OX=9606 GN=XRN1 PE=1 SV=1	1	8	8	8	1	4	4	3	2	3	2	3	3	2	1	4	4	3	2	3	2	3	3	2	1	4	4	3	2	3
P12956;P51449	X-ray repair cross-complementing protein 6	XRCC6	1.0116	0.99953	0.99382	1.0098	1.0153	1.0106	0.92279	0.9333	1.0853	1.0784	P12956	61;1	61;1	61;1	X-ray repair cross-complementing protein 6	XRCC6	sp|P12956|XRCC6_HUMAN X-ray repair cross-complementing protein 6 OS=Homo sapiens OX=9606 GN=XRCC6 PE=1 SV=2	2	61	61	61	36	36	38	35	48	49	36	38	36	38	36	36	38	35	48	49	36	38	36	38	36	36	38	35	48	49
P13010	X-ray repair cross-complementing protein 5	XRCC5	0.99329	1.0086	1.0127	1.0398	1.0132	1.0177	0.94107	0.92998	1.0785	1.0834	P13010	70	70	70	X-ray repair cross-complementing protein 5	XRCC5	sp|P13010|XRCC5_HUMAN X-ray repair cross-complementing protein 5 OS=Homo sapiens OX=9606 GN=XRCC5 PE=1 SV=3	1	70	70	70	35	35	35	39	57	58	38	38	39	37	35	35	35	39	57	58	38	38	39	37	35	35	35	39	57	58
Q13426	DNA repair protein XRCC4	XRCC4	0.92135	0.85381	0.96344	0.92312	0.93627	0.95957	0.94251	0.92987	0.93207	0.90221	Q13426	12	12	12	DNA repair protein XRCC4	XRCC4	sp|Q13426|XRCC4_HUMAN DNA repair protein XRCC4 OS=Homo sapiens OX=9606 GN=XRCC4 PE=1 SV=2	1	12	12	12	6	7	7	6	2	2	7	10	8	7	6	7	7	6	2	2	7	10	8	7	6	7	7	6	2	2
O43542	DNA repair protein XRCC3	XRCC3	NaN	NaN	NaN	NaN	1.0317	NaN	NaN	NaN	0.63967	0.75639	O43542	3	3	3	DNA repair protein XRCC3	XRCC3	sp|O43542|XRCC3_HUMAN DNA repair protein XRCC3 OS=Homo sapiens OX=9606 GN=XRCC3 PE=1 SV=1	1	3	3	3	0	0	0	0	1	2	1	0	0	0	0	0	0	0	1	2	1	0	0	0	0	0	0	0	1	2
P18887	DNA repair protein XRCC1	XRCC1	0.91698	0.92309	0.99044	1.0483	0.95688	0.89113	0.81855	0.96508	1.2632	1.361	P18887	11	11	11	DNA repair protein XRCC1	XRCC1	sp|P18887|XRCC1_HUMAN DNA repair protein XRCC1 OS=Homo sapiens OX=9606 GN=XRCC1 PE=1 SV=2	1	11	11	11	2	6	5	4	5	5	5	5	5	7	2	6	5	4	5	5	5	5	5	7	2	6	5	4	5	5
O43592	Exportin-T	XPOT	1.1082	0.94733	0.99993	1.1177	0.99601	1.0974	1.3748	1.3704	0.92507	0.80613	O43592	17	17	17	Exportin-T	XPOT	sp|O43592|XPOT_HUMAN Exportin-T OS=Homo sapiens OX=9606 GN=XPOT PE=1 SV=2	1	17	17	17	11	14	8	9	4	4	8	8	9	6	11	14	8	9	4	4	8	8	9	6	11	14	8	9	4	4
Q9UIA9;Q9H2T7	Exportin-7	XPO7	0.91079	1.0461	0.93415	1.008	1.0431	1.0353	0.87637	0.92313	1.0504	1.2097	Q9UIA9	15;1	15;1	15;1	Exportin-7	XPO7	sp|Q9UIA9|XPO7_HUMAN Exportin-7 OS=Homo sapiens OX=9606 GN=XPO7 PE=1 SV=3	2	15	15	15	8	6	8	8	7	9	9	10	5	6	8	6	8	8	7	9	9	10	5	6	8	6	8	8	7	9
Q96QU8	Exportin-6	XPO6	0.81192	0.84472	0.75312	0.68048	0.69794	0.63434	0.59139	0.52445	NaN	NaN	Q96QU8	5	5	5	Exportin-6	XPO6	sp|Q96QU8|XPO6_HUMAN Exportin-6 OS=Homo sapiens OX=9606 GN=XPO6 PE=1 SV=1	1	5	5	5	2	2	2	3	0	0	3	2	3	2	2	2	2	3	0	0	3	2	3	2	2	2	2	3	0	0
Q9HAV4	Exportin-5	XPO5	0.98913	1.0191	0.97045	1.0084	1.0008	1.0271	0.93383	0.90959	1.254	1.1912	Q9HAV4	47	47	47	Exportin-5	XPO5	sp|Q9HAV4|XPO5_HUMAN Exportin-5 OS=Homo sapiens OX=9606 GN=XPO5 PE=1 SV=1	1	47	47	47	27	30	27	28	20	17	34	34	32	31	27	30	27	28	20	17	34	34	32	31	27	30	27	28	20	17
Q9C0E2	Exportin-4	XPO4	0.96238	1.4065	0.94369	1.1482	1.036	1.1977	0.88705	1.1337	1.0262	0.83222	Q9C0E2	13	13	13	Exportin-4	XPO4	sp|Q9C0E2|XPO4_HUMAN Exportin-4 OS=Homo sapiens OX=9606 GN=XPO4 PE=1 SV=2	1	13	13	13	4	3	4	3	5	4	3	3	7	4	4	3	4	3	5	4	3	3	7	4	4	3	4	3	5	4
O14980	Exportin-1	XPO1	1.0203	1.0084	0.98303	1.0145	1.009	0.97822	0.86779	0.87288	1.0117	1.0145	O14980	53	53	53	Exportin-1	XPO1	sp|O14980|XPO1_HUMAN Exportin-1 OS=Homo sapiens OX=9606 GN=XPO1 PE=1 SV=1	1	53	53	53	35	32	32	33	37	37	34	32	33	33	35	32	32	33	37	37	34	32	33	33	35	32	32	33	37	37
Q9NQH7	Probable Xaa-Pro aminopeptidase 3	XPNPEP3	0.97866	0.98848	1.0917	1.06	1.0768	1.1041	1.0264	0.93629	0.93702	1.034	Q9NQH7	7	7	7	Probable Xaa-Pro aminopeptidase 3	XPNPEP3	sp|Q9NQH7|XPP3_HUMAN Xaa-Pro aminopeptidase 3 OS=Homo sapiens OX=9606 GN=XPNPEP3 PE=1 SV=1	1	7	7	7	6	4	6	5	1	1	5	3	5	4	6	4	6	5	1	1	5	3	5	4	6	4	6	5	1	1
Q9NQW7	Xaa-Pro aminopeptidase 1	XPNPEP1	0.97673	0.98279	0.96001	1.0143	1.0436	0.99819	1.1867	1.2326	0.81936	0.81779	Q9NQW7	27	27	26	Xaa-Pro aminopeptidase 1	XPNPEP1	sp|Q9NQW7|XPP1_HUMAN Xaa-Pro aminopeptidase 1 OS=Homo sapiens OX=9606 GN=XPNPEP1 PE=1 SV=3	1	27	27	26	20	21	18	19	14	10	18	19	21	20	20	21	18	19	14	10	18	19	21	20	19	20	18	18	14	10
Q01831	DNA repair protein complementing XP-C cells	XPC	0.74014	0.85857	1.0261	1.0249	0.86642	0.92821	0.81223	0.79236	0.89126	NaN	Q01831	10	10	10	DNA repair protein complementing XP-C cells	XPC	sp|Q01831|XPC_HUMAN DNA repair protein complementing XP-C cells OS=Homo sapiens OX=9606 GN=XPC PE=1 SV=4	1	10	10	10	5	2	5	4	2	2	6	5	4	5	5	2	5	4	2	2	6	5	4	5	5	2	5	4	2	2
P23025	DNA repair protein complementing XP-A cells	XPA	NaN	1.0217	NaN	NaN	NaN	NaN	NaN	0.82031	NaN	1.7533	P23025	1	1	1	DNA repair protein complementing XP-A cells	XPA	sp|P23025|XPA_HUMAN DNA repair protein complementing XP-A cells OS=Homo sapiens OX=9606 GN=XPA PE=1 SV=1	1	1	1	1	0	0	0	1	1	1	0	0	0	1	0	0	0	1	1	1	0	0	0	1	0	0	0	1	1	1
P98170	E3 ubiquitin-protein ligase XIAP	XIAP	0.84206	NaN	0.95429	NaN	NaN	NaN	0.99729	NaN	0.81544	NaN	P98170	2	2	2	E3 ubiquitin-protein ligase XIAP	XIAP	sp|P98170|XIAP_HUMAN E3 ubiquitin-protein ligase XIAP OS=Homo sapiens OX=9606 GN=XIAP PE=1 SV=2	1	2	2	2	1	0	1	0	1	0	0	0	1	0	1	0	1	0	1	0	0	0	1	0	1	0	1	0	1	0
Q9HCS7	Pre-mRNA-splicing factor SYF1	XAB2	0.91854	1.0157	0.63499	0.98509	0.92635	0.95893	0.6356	0.60115	1.1119	1.119	Q9HCS7	27	27	27	Pre-mRNA-splicing factor SYF1	XAB2	sp|Q9HCS7|SYF1_HUMAN Pre-mRNA-splicing factor SYF1 OS=Homo sapiens OX=9606 GN=XAB2 PE=1 SV=2	1	27	27	27	8	6	11	9	7	7	10	13	14	13	8	6	11	9	7	7	10	13	14	13	8	6	11	9	7	7
Q9GZV5	WW domain-containing transcription regulator protein 1	WWTR1	0.90539	0.92798	0.95758	0.95116	0.89176	1.0206	1.5409	1.3493	NaN	NaN	Q9GZV5	2	2	2	WW domain-containing transcription regulator protein 1	WWTR1	sp|Q9GZV5|WWTR1_HUMAN WW domain-containing transcription regulator protein 1 OS=Homo sapiens OX=9606 GN=WWTR1 PE=1 SV=1	1	2	2	2	2	2	1	2	0	0	2	2	2	1	2	2	1	2	0	0	2	2	2	1	2	2	1	2	0	0
O00308	NEDD4-like E3 ubiquitin-protein ligase WWP2	WWP2	1.1493	1.1779	1.0465	1.0533	1.2898	1.098	2.2431	1.677	NaN	NaN	O00308	5	3	3	NEDD4-like E3 ubiquitin-protein ligase WWP2	WWP2	sp|O00308|WWP2_HUMAN NEDD4-like E3 ubiquitin-protein ligase WWP2 OS=Homo sapiens OX=9606 GN=WWP2 PE=1 SV=2	1	5	3	3	3	4	3	4	0	1	3	3	3	3	2	3	2	3	0	0	2	2	2	2	2	3	2	3	0	0
Q15007	Pre-mRNA-splicing regulator WTAP	WTAP	1.019	0.9532	1.0211	0.94454	0.99731	0.84101	0.85183	0.89481	1.1556	1.007	Q15007	10	10	10	Pre-mRNA-splicing regulator WTAP	WTAP	sp|Q15007|FL2D_HUMAN Pre-mRNA-splicing regulator WTAP OS=Homo sapiens OX=9606 GN=WTAP PE=1 SV=2	1	10	10	10	3	2	3	3	5	4	3	3	6	5	3	2	3	3	5	4	3	3	6	5	3	2	3	3	5	4
Q96S55	ATPase WRNIP1	WRNIP1	1.0756	1.0789	1.0205	0.89531	1.0727	1.0471	0.91526	0.93855	1.0804	1.2077	Q96S55	23	23	23	ATPase WRNIP1	WRNIP1	sp|Q96S55|WRIP1_HUMAN ATPase WRNIP1 OS=Homo sapiens OX=9606 GN=WRNIP1 PE=1 SV=2	1	23	23	23	8	9	9	10	10	8	15	14	12	15	8	9	9	10	10	8	15	14	12	15	8	9	9	10	10	8
Q9P2S5	WD repeat-containing protein WRAP73	WRAP73	0.69172	NaN	NaN	NaN	NaN	8.8267	NaN	NaN	0.17938	NaN	Q9P2S5	3	3	3	WD repeat-containing protein WRAP73	WRAP73	sp|Q9P2S5|WRP73_HUMAN WD repeat-containing protein WRAP73 OS=Homo sapiens OX=9606 GN=WRAP73 PE=1 SV=1	1	3	3	3	0	0	1	0	1	0	0	1	1	0	0	0	1	0	1	0	0	1	1	0	0	0	1	0	1	0
Q9BUR4	Telomerase Cajal body protein 1	WRAP53	1.0221	0.99821	1.0064	1.0046	0.98253	0.95518	0.64137	0.71915	0.96078	0.97023	Q9BUR4	12	12	12	Telomerase Cajal body protein 1	WRAP53	sp|Q9BUR4|TCAB1_HUMAN Telomerase Cajal body protein 1 OS=Homo sapiens OX=9606 GN=WRAP53 PE=1 SV=1	1	12	12	12	3	4	6	7	3	2	2	6	6	9	3	4	6	7	3	2	2	6	6	9	3	4	6	7	3	2
Q9UBV4	Protein Wnt-16	WNT16	0.77412	1.1143	0.96072	0.86575	1.0212	0.91222	0.54054	0.5948	1.5042	NaN	Q9UBV4	2	2	2	Protein Wnt-16	WNT16	sp|Q9UBV4|WNT16_HUMAN Protein Wnt-16 OS=Homo sapiens OX=9606 GN=WNT16 PE=2 SV=1	1	2	2	2	1	1	1	1	1	0	1	1	2	1	1	1	1	1	1	0	1	1	2	1	1	1	1	1	1	0
Q9H4A3;Q96J92;Q9Y3S1	Serine/threonine-protein kinase WNK1	WNK1	0.91906	0.94112	0.99156	0.82467	0.99781	0.95252	0.65357	0.75324	1.1119	1.5982	Q9H4A3	11;2;1	11;2;1	11;2;1	Serine/threonine-protein kinase WNK1	WNK1	sp|Q9H4A3|WNK1_HUMAN Serine/threonine-protein kinase WNK1 OS=Homo sapiens OX=9606 GN=WNK1 PE=1 SV=2	3	11	11	11	1	1	3	5	2	3	6	4	6	5	1	1	3	5	2	3	6	4	6	5	1	1	3	5	2	3
Q5T9L3	Protein wntless homolog	WLS	0.87168	0.94909	0.81549	1.0705	NaN	NaN	0.5497	0.52822	0.946	1.4933	Q5T9L3	4	4	4	Protein wntless homolog	WLS	sp|Q5T9L3|WLS_HUMAN Protein wntless homolog OS=Homo sapiens OX=9606 GN=WLS PE=1 SV=2	1	4	4	4	1	1	2	2	3	2	0	0	2	3	1	1	2	2	3	2	0	0	2	3	1	1	2	2	3	2
O95785	Protein Wiz	WIZ	0.94573	1.153	1.3511	3.182	1.0637	4.9688	0.89098	0.79432	NaN	0.95319	O95785	8	8	8	Protein Wiz	WIZ	sp|O95785|WIZ_HUMAN Protein Wiz OS=Homo sapiens OX=9606 GN=WIZ PE=1 SV=2	1	8	8	8	4	4	6	5	0	1	5	2	4	5	4	4	6	5	0	1	5	2	4	5	4	4	6	5	0	1
Q9Y4P8	WD repeat domain phosphoinositide-interacting protein 2	WIPI2	NaN	NaN	0.88378	0.94194	0.89157	0.81213	1.3759	0.9624	NaN	NaN	Q9Y4P8	2	2	2	WD repeat domain phosphoinositide-interacting protein 2	WIPI2	sp|Q9Y4P8|WIPI2_HUMAN WD repeat domain phosphoinositide-interacting protein 2 OS=Homo sapiens OX=9606 GN=WIPI2 PE=1 SV=1	1	2	2	2	1	2	2	2	0	0	1	1	0	0	1	2	2	2	0	0	1	1	0	0	1	2	2	2	0	0
Q8TF74	WAS/WASL-interacting protein family member 2	WIPF2	1.3204	0.99037	0.8755	NaN	NaN	NaN	NaN	0.92896	NaN	NaN	Q8TF74	5	5	5	WAS/WASL-interacting protein family member 2	WIPF2	sp|Q8TF74|WIPF2_HUMAN WAS/WASL-interacting protein family member 2 OS=Homo sapiens OX=9606 GN=WIPF2 PE=1 SV=1	1	5	5	5	2	0	0	2	0	0	0	0	2	1	2	0	0	2	0	0	0	0	2	1	2	0	0	2	0	0
Q9BRP8	Partner of Y14 and mago	WIBG	0.93638	0.96376	1.0571	0.88117	0.91714	0.97673	0.97606	1.0746	1.1337	0.94766	Q9BRP8	14	14	14	Partner of Y14 and mago	WIBG	sp|Q9BRP8|PYM1_HUMAN Partner of Y14 and mago OS=Homo sapiens OX=9606 GN=PYM1 PE=1 SV=1	1	14	14	14	9	7	7	7	6	8	8	6	9	8	9	7	7	7	6	8	8	6	9	8	9	7	7	7	6	8
Q9BZ95	Histone-lysine N-methyltransferase NSD3	WHSC1L1	1.0107	1.644	2.2804	1.024	1.0265	NaN	NaN	NaN	NaN	NaN	Q9BZ95	3	3	3	Histone-lysine N-methyltransferase NSD3	WHSC1L1	sp|Q9BZ95|NSD3_HUMAN Histone-lysine N-methyltransferase NSD3 OS=Homo sapiens OX=9606 GN=NSD3 PE=1 SV=1	1	3	3	3	1	1	0	0	0	0	2	0	1	1	1	1	0	0	0	0	2	0	1	1	1	1	0	0	0	0
O96028	Histone-lysine N-methyltransferase NSD2	WHSC1	0.91085	1.03	1.0569	0.9718	0.80626	0.77811	0.87809	0.99964	1.6317	1.2958	O96028	9	9	9	Histone-lysine N-methyltransferase NSD2	WHSC1	sp|O96028|NSD2_HUMAN Histone-lysine N-methyltransferase NSD2 OS=Homo sapiens OX=9606 GN=NSD2 PE=1 SV=1	1	9	9	9	2	2	3	1	2	3	2	2	2	2	2	2	3	1	2	3	2	2	2	2	2	2	3	1	2	3
O76024	Wolframin	WFS1	0.82023	0.8326	0.88346	0.96241	0.97243	0.84485	1.0252	1.1108	0.85512	0.85007	O76024	11	11	11	Wolframin	WFS1	sp|O76024|WFS1_HUMAN Wolframin OS=Homo sapiens OX=9606 GN=WFS1 PE=1 SV=2	1	11	11	11	5	3	5	4	5	4	4	3	5	4	5	3	5	4	5	4	4	3	5	4	5	3	5	4	5	4
Q96MX6	WD repeat-containing protein 92	WDR92	0.89827	0.92247	0.92278	1.0444	1.0755	0.84231	1.2356	1.2277	1.2448	1.3094	Q96MX6	6	6	6	WD repeat-containing protein 92	WDR92	sp|Q96MX6|WDR92_HUMAN WD repeat-containing protein 92 OS=Homo sapiens OX=9606 GN=WDR92 PE=1 SV=1	1	6	6	6	3	4	3	4	1	2	2	3	2	3	3	4	3	4	1	2	2	3	2	3	3	4	3	4	1	2
Q96FK6	WD repeat-containing protein 89	WDR89	1.174	1.3093	1.0231	NaN	1.4444	NaN	0.78031	0.90695	NaN	NaN	Q96FK6	2	2	2	WD repeat-containing protein 89	WDR89	sp|Q96FK6|WDR89_HUMAN WD repeat-containing protein 89 OS=Homo sapiens OX=9606 GN=WDR89 PE=2 SV=1	1	2	2	2	2	0	1	1	0	0	1	0	1	1	2	0	1	1	0	0	1	0	1	1	2	0	1	1	0	0
Q6UXN9	WD repeat-containing protein 82	WDR82	1.0566	1.0839	1.0151	1.0445	1.1497	1.0773	0.92675	0.96959	0.95656	0.98549	Q6UXN9	12	12	12	WD repeat-containing protein 82	WDR82	sp|Q6UXN9|WDR82_HUMAN WD repeat-containing protein 82 OS=Homo sapiens OX=9606 GN=WDR82 PE=1 SV=1	1	12	12	12	8	8	9	8	5	7	9	8	9	9	8	8	9	8	5	7	9	8	9	9	8	8	9	8	5	7
Q562E7	WD repeat-containing protein 81	WDR81	1.0269	0.8551	NaN	1.0573	NaN	NaN	1.4722	1.0643	1.0793	NaN	Q562E7	4	4	4	WD repeat-containing protein 81	WDR81	sp|Q562E7|WDR81_HUMAN WD repeat-containing protein 81 OS=Homo sapiens OX=9606 GN=WDR81 PE=1 SV=2	1	4	4	4	0	2	2	1	1	0	0	0	2	2	0	2	2	1	1	0	0	0	2	2	0	2	2	1	1	0
Q9BQA1	Methylosome protein 50	WDR77	0.96221	1.0335	0.9422	0.96048	0.95677	1.0327	0.83883	0.76781	1.0189	0.99943	Q9BQA1	11	11	11	Methylosome protein 50	WDR77	sp|Q9BQA1|MEP50_HUMAN Methylosome protein 50 OS=Homo sapiens OX=9606 GN=WDR77 PE=1 SV=1	1	11	11	11	10	10	10	9	6	5	9	9	10	10	10	10	10	9	6	5	9	9	10	10	10	10	10	9	6	5
Q8IWA0	WD repeat-containing protein 75	WDR75	1.1112	1.1276	1.0143	1.0531	1.2745	1.1785	0.90281	0.82779	0.96518	1.0328	Q8IWA0	27	27	27	WD repeat-containing protein 75	WDR75	sp|Q8IWA0|WDR75_HUMAN WD repeat-containing protein 75 OS=Homo sapiens OX=9606 GN=WDR75 PE=1 SV=1	1	27	27	27	13	11	14	13	9	8	15	14	19	12	13	11	14	13	9	8	15	14	19	12	13	11	14	13	9	8
Q6RFH5	WD repeat-containing protein 74	WDR74	0.98553	1.0083	0.94813	1.0342	1.057	0.95318	0.75936	0.76433	0.8611	0.86644	Q6RFH5	18	18	18	WD repeat-containing protein 74	WDR74	sp|Q6RFH5|WDR74_HUMAN WD repeat-containing protein 74 OS=Homo sapiens OX=9606 GN=WDR74 PE=1 SV=1	1	18	18	18	12	12	12	13	6	4	10	9	15	14	12	12	12	13	6	4	10	9	15	14	12	12	12	13	6	4
Q6P4I2	WD repeat-containing protein 73	WDR73	1.0164	0.90315	0.67919	NaN	0.52955	0.35249	NaN	0.42547	1.0046	1.0162	Q6P4I2	4	4	4	WD repeat-containing protein 73	WDR73	sp|Q6P4I2|WDR73_HUMAN WD repeat-containing protein 73 OS=Homo sapiens OX=9606 GN=WDR73 PE=1 SV=1	1	4	4	4	2	0	1	2	1	1	1	2	2	2	2	0	1	2	1	1	1	2	2	2	2	0	1	2	1	1
Q9NW82	WD repeat-containing protein 70	WDR70	0.91943	0.95599	0.90285	0.78476	1.0172	1.0242	0.71432	0.86051	1.3878	1.1814	Q9NW82	11	11	11	WD repeat-containing protein 70	WDR70	sp|Q9NW82|WDR70_HUMAN WD repeat-containing protein 70 OS=Homo sapiens OX=9606 GN=WDR70 PE=1 SV=1	1	11	11	11	4	4	5	3	5	7	4	4	5	6	4	4	5	3	5	7	4	4	5	6	4	4	5	3	5	7
Q9GZS3	WD repeat-containing protein 61;WD repeat-containing protein 61, N-terminally processed	WDR61	1.0839	1.0744	1.1461	1.0197	1.0844	1.1639	0.95535	0.98647	1.0978	1.0481	Q9GZS3	13	13	13	WD repeat-containing protein 61;WD repeat-containing protein 61, N-terminally processed	WDR61	sp|Q9GZS3|WDR61_HUMAN WD repeat-containing protein 61 OS=Homo sapiens OX=9606 GN=WDR61 PE=1 SV=1	1	13	13	13	9	7	6	6	5	7	8	6	8	8	9	7	6	6	5	7	8	6	8	8	9	7	6	6	5	7
Q9NNW5	WD repeat-containing protein 6	WDR6	0.98058	0.99453	1.072	1.0497	1.0645	1.0072	0.71622	0.80065	1.2045	1.3148	Q9NNW5	9	9	9	WD repeat-containing protein 6	WDR6	sp|Q9NNW5|WDR6_HUMAN WD repeat-containing protein 6 OS=Homo sapiens OX=9606 GN=WDR6 PE=1 SV=1	1	9	9	9	3	4	5	5	3	2	5	5	5	6	3	4	5	5	3	2	5	5	5	6	3	4	5	5	3	2
Q9H6Y2	WD repeat-containing protein 55	WDR55	0.97431	1.0036	0.99564	1.0705	0.99318	1.0034	0.75026	0.78369	0.57451	0.54584	Q9H6Y2	14	14	14	WD repeat-containing protein 55	WDR55	sp|Q9H6Y2|WDR55_HUMAN WD repeat-containing protein 55 OS=Homo sapiens OX=9606 GN=WDR55 PE=1 SV=2	1	14	14	14	6	8	8	10	5	4	6	9	8	8	6	8	8	10	5	4	6	9	8	8	6	8	8	10	5	4
P61964	WD repeat-containing protein 5	WDR5	1.0828	1.1218	1.0495	1.0989	1.1427	1.0284	0.94357	0.92007	0.99366	1.19	P61964	13	13	13	WD repeat-containing protein 5	WDR5	sp|P61964|WDR5_HUMAN WD repeat-containing protein 5 OS=Homo sapiens OX=9606 GN=WDR5 PE=1 SV=1	1	13	13	13	10	9	10	10	8	8	9	10	11	10	10	9	10	10	8	8	9	10	11	10	10	9	10	10	8	8
Q8TAF3	WD repeat-containing protein 48	WDR48	NaN	1.2424	NaN	NaN	1.1763	NaN	1.2969	1.2469	NaN	NaN	Q8TAF3	4	4	4	WD repeat-containing protein 48	WDR48	sp|Q8TAF3|WDR48_HUMAN WD repeat-containing protein 48 OS=Homo sapiens OX=9606 GN=WDR48 PE=1 SV=1	1	4	4	4	0	0	2	1	1	2	1	0	0	1	0	0	2	1	1	2	1	0	0	1	0	0	2	1	1	2
O15213	WD repeat-containing protein 46	WDR46	1.0279	1.0396	0.98528	1.0162	1.0612	1.078	0.93441	0.92566	0.87778	0.83856	O15213	20	20	20	WD repeat-containing protein 46	WDR46	sp|O15213|WDR46_HUMAN WD repeat-containing protein 46 OS=Homo sapiens OX=9606 GN=WDR46 PE=1 SV=3	1	20	20	20	14	14	13	12	9	8	14	13	15	15	14	14	13	12	9	8	14	13	15	15	14	14	13	12	9	8
Q5MNZ6	WD repeat domain phosphoinositide-interacting protein 3	WDR45B	0.89019	0.89594	0.8867	1.0326	0.94916	1.0777	1.2358	1.334	NaN	NaN	Q5MNZ6	3	3	3	WD repeat domain phosphoinositide-interacting protein 3	WDR45B	sp|Q5MNZ6|WIPI3_HUMAN WD repeat domain phosphoinositide-interacting protein 3 OS=Homo sapiens OX=9606 GN=WDR45B PE=2 SV=2	1	3	3	3	2	2	2	2	0	0	1	2	2	3	2	2	2	2	0	0	1	2	2	3	2	2	2	2	0	0
Q5JSH3	WD repeat-containing protein 44	WDR44	1.0702	0.87417	1.0884	0.93553	1.4589	1.0278	1.3024	0.95728	NaN	0.791	Q5JSH3	11	11	11	WD repeat-containing protein 44	WDR44	sp|Q5JSH3|WDR44_HUMAN WD repeat-containing protein 44 OS=Homo sapiens OX=9606 GN=WDR44 PE=1 SV=1	1	11	11	11	6	8	6	5	0	2	3	2	5	6	6	8	6	5	0	2	3	2	5	6	6	8	6	5	0	2
Q15061	WD repeat-containing protein 43	WDR43	0.98131	1.004	1.0263	1.0306	1.0036	1.0017	0.87047	0.8946	0.92377	0.99694	Q15061	18	18	18	WD repeat-containing protein 43	WDR43	sp|Q15061|WDR43_HUMAN WD repeat-containing protein 43 OS=Homo sapiens OX=9606 GN=WDR43 PE=1 SV=3	1	18	18	18	10	11	11	11	6	6	11	11	11	10	10	11	11	11	6	6	11	11	11	10	10	11	11	11	6	6
Q9HAD4	WD repeat-containing protein 41	WDR41	NaN	0.76515	NaN	0.83495	NaN	NaN	0.7294	0.66478	NaN	NaN	Q9HAD4	1	1	1	WD repeat-containing protein 41	WDR41	sp|Q9HAD4|WDR41_HUMAN WD repeat-containing protein 41 OS=Homo sapiens OX=9606 GN=WDR41 PE=1 SV=3	1	1	1	1	0	1	1	1	0	0	0	0	0	1	0	1	1	1	0	0	0	0	0	1	0	1	1	1	0	0
Q8NI36	WD repeat-containing protein 36	WDR36	1.0276	1.0513	0.95569	1.0669	0.98649	1.0543	0.78561	0.79887	0.71441	0.66137	Q8NI36	33	33	33	WD repeat-containing protein 36	WDR36	sp|Q8NI36|WDR36_HUMAN WD repeat-containing protein 36 OS=Homo sapiens OX=9606 GN=WDR36 PE=1 SV=1	1	33	33	33	19	18	19	21	17	23	14	16	24	22	19	18	19	21	17	23	14	16	24	22	19	18	19	21	17	23
Q9C0J8	pre-mRNA 3 end processing protein WDR33	WDR33	0.9454	1.0065	1.0263	0.94177	0.93093	1.0086	0.89522	0.90491	1.0986	0.99758	Q9C0J8	29	29	29	pre-mRNA 3 end processing protein WDR33	WDR33	sp|Q9C0J8|WDR33_HUMAN pre-mRNA 3 end processing protein WDR33 OS=Homo sapiens OX=9606 GN=WDR33 PE=1 SV=2	1	29	29	29	15	12	13	16	12	10	15	12	16	16	15	12	13	16	12	10	15	12	16	16	15	12	13	16	12	10
Q9UNX4	WD repeat-containing protein 3	WDR3	1.0856	1.0612	0.99256	1.0621	0.98304	1.006	0.75156	0.69118	0.80126	0.81821	Q9UNX4	43	43	43	WD repeat-containing protein 3	WDR3	sp|Q9UNX4|WDR3_HUMAN WD repeat-containing protein 3 OS=Homo sapiens OX=9606 GN=WDR3 PE=1 SV=1	1	43	43	43	18	16	21	16	19	14	14	17	22	24	18	16	21	16	19	14	14	17	22	24	18	16	21	16	19	14
Q9H7D7	WD repeat-containing protein 26	WDR26	0.97958	1.1772	0.93575	0.97918	1.1951	0.96751	1.0219	0.95275	0.93523	0.77917	Q9H7D7	9	9	9	WD repeat-containing protein 26	WDR26	sp|Q9H7D7|WDR26_HUMAN WD repeat-containing protein 26 OS=Homo sapiens OX=9606 GN=WDR26 PE=1 SV=3	1	9	9	9	7	7	7	7	3	1	5	6	7	8	7	7	7	7	3	1	5	6	7	8	7	7	7	7	3	1
Q9BV38	WD repeat-containing protein 18	WDR18	0.95247	0.9229	0.91913	0.92076	0.92183	0.93769	0.9262	0.8067	1.0266	1.0164	Q9BV38	12	12	12	WD repeat-containing protein 18	WDR18	sp|Q9BV38|WDR18_HUMAN WD repeat-containing protein 18 OS=Homo sapiens OX=9606 GN=WDR18 PE=1 SV=2	1	12	12	12	6	8	9	6	5	2	8	10	8	8	6	8	9	6	5	2	8	10	8	8	6	8	9	6	5	2
Q9GZL7	Ribosome biogenesis protein WDR12	WDR12	0.99955	1.0052	1.018	1.0176	1.0386	1.0358	0.73888	0.7944	0.92995	0.99087	Q9GZL7	20	20	20	Ribosome biogenesis protein WDR12	WDR12	sp|Q9GZL7|WDR12_HUMAN Ribosome biogenesis protein WDR12 OS=Homo sapiens OX=9606 GN=WDR12 PE=1 SV=2	1	20	20	20	14	12	13	14	11	14	15	12	13	12	14	12	13	14	11	14	15	12	13	12	14	12	13	14	11	14
Q9BZH6	WD repeat-containing protein 11	WDR11	1.071	1.0315	0.93699	1.0886	1.1618	1.0962	1.3351	1.3356	NaN	0.44607	Q9BZH6	10	10	10	WD repeat-containing protein 11	WDR11	sp|Q9BZH6|WDR11_HUMAN WD repeat-containing protein 11 OS=Homo sapiens OX=9606 GN=WDR11 PE=1 SV=1	1	10	10	10	4	5	4	6	0	3	4	5	5	4	4	5	4	6	0	3	4	5	5	4	4	5	4	6	0	3
O75083	WD repeat-containing protein 1	WDR1	1.0597	1.0948	1.0294	1.0181	1.109	1.0642	1.0445	1.0187	0.97843	0.94384	O75083	37	37	37	WD repeat-containing protein 1	WDR1	sp|O75083|WDR1_HUMAN WD repeat-containing protein 1 OS=Homo sapiens OX=9606 GN=WDR1 PE=1 SV=4	1	37	37	37	23	26	25	23	29	27	22	23	24	26	23	26	25	23	29	27	22	23	24	26	23	26	25	23	29	27
O75717	WD repeat and HMG-box DNA-binding protein 1	WDHD1	1.0798	1.0578	1.0859	1.1592	1.0525	1.0592	0.88259	0.90174	1.2373	1.1698	O75717	36	36	36	WD repeat and HMG-box DNA-binding protein 1	WDHD1	sp|O75717|WDHD1_HUMAN WD repeat and HMG-box DNA-binding protein 1 OS=Homo sapiens OX=9606 GN=WDHD1 PE=1 SV=1	1	36	36	36	18	18	19	14	15	17	21	21	20	19	18	18	19	14	15	17	21	21	20	19	18	18	19	14	15	17
Q8IWB7	WD repeat and FYVE domain-containing protein 1	WDFY1	0.65669	0.98513	0.83806	0.72133	0.89056	0.74634	0.71859	0.68676	0.78837	0.89607	Q8IWB7	5	5	5	WD repeat and FYVE domain-containing protein 1	WDFY1	sp|Q8IWB7|WDFY1_HUMAN WD repeat and FYVE domain-containing protein 1 OS=Homo sapiens OX=9606 GN=WDFY1 PE=1 SV=1	1	5	5	5	2	2	2	2	2	2	1	2	3	2	2	2	2	2	2	2	1	2	3	2	2	2	2	2	2	2
O43709	Probable 18S rRNA (guanine-N(7))-methyltransferase	WBSCR22	1.0072	1.0977	1.1666	1.2949	0.89157	0.98798	0.77108	0.72474	NaN	1.0171	O43709	6	6	6	Probable 18S rRNA (guanine-N(7))-methyltransferase	WBSCR22	sp|O43709|BUD23_HUMAN Probable 18S rRNA (guanine-N(7))-methyltransferase OS=Homo sapiens OX=9606 GN=BUD23 PE=1 SV=2	1	6	6	6	2	2	4	2	1	2	4	4	5	5	2	2	4	2	1	2	4	4	5	5	2	2	4	2	1	2
Q96I51	Williams-Beuren syndrome chromosomal region 16 protein	WBSCR16	0.42255	1.4667	0.75282	NaN	NaN	NaN	1.0556	NaN	0.72957	NaN	Q96I51	4	4	4	Williams-Beuren syndrome chromosomal region 16 protein	WBSCR16	sp|Q96I51|RCC1L_HUMAN RCC1-like G exchanging factor-like protein OS=Homo sapiens OX=9606 GN=RCC1L PE=1 SV=2	1	4	4	4	1	0	2	0	2	2	1	0	1	1	1	0	2	0	2	2	1	0	1	1	1	0	2	0	2	2
O75554	WW domain-binding protein 4	WBP4	0.83746	1.0253	0.83544	0.77805	0.70619	0.89326	0.84046	0.79971	1.3492	1.1962	O75554	5	5	5	WW domain-binding protein 4	WBP4	sp|O75554|WBP4_HUMAN WW domain-binding protein 4 OS=Homo sapiens OX=9606 GN=WBP4 PE=1 SV=1	1	5	5	5	2	2	2	2	1	1	1	2	2	3	2	2	2	2	1	1	1	2	2	3	2	2	2	2	1	1
Q969T9	WW domain-binding protein 2	WBP2	1.0595	0.98095	0.94973	1.1306	0.83834	0.96104	1.2419	1.7188	NaN	1.6414	Q969T9	3	3	3	WW domain-binding protein 2	WBP2	sp|Q969T9|WBP2_HUMAN WW domain-binding protein 2 OS=Homo sapiens OX=9606 GN=WBP2 PE=1 SV=1	1	3	3	3	3	3	2	2	1	2	3	3	3	3	3	3	2	2	1	2	3	3	3	3	3	3	2	2	1	2
Q9Y2W2	WW domain-binding protein 11	WBP11	0.98051	0.96433	0.96973	0.90365	0.92347	0.9137	1.0591	1.0942	0.92923	0.89379	Q9Y2W2	16	16	16	WW domain-binding protein 11	WBP11	sp|Q9Y2W2|WBP11_HUMAN WW domain-binding protein 11 OS=Homo sapiens OX=9606 GN=WBP11 PE=1 SV=1	1	16	16	16	9	8	8	8	7	6	8	8	10	10	9	8	8	8	7	6	8	8	10	10	9	8	8	8	7	6
O00401	Neural Wiskott-Aldrich syndrome protein	WASL	0.93256	0.85363	0.89683	0.92569	0.82049	0.89344	0.88591	0.85573	1.0427	0.9153	O00401	10	10	10	Neural Wiskott-Aldrich syndrome protein	WASL	sp|O00401|WASL_HUMAN Neural Wiskott-Aldrich syndrome protein OS=Homo sapiens OX=9606 GN=WASL PE=1 SV=2	1	10	10	10	5	5	6	4	3	2	5	5	4	5	5	5	6	4	3	2	5	5	4	5	5	5	6	4	3	2
Q9NQA3	WAS protein family homolog 6	WASH6P	NaN	NaN	NaN	NaN	NaN	NaN	NaN	NaN	NaN	NaN	Q9NQA3	1	1	1	WAS protein family homolog 6	WASH6P	sp|Q9NQA3|WASH6_HUMAN WAS protein family homolog 6 OS=Homo sapiens OX=9606 GN=WASH6P PE=1 SV=3	1	1	1	1	0	0	0	0	1	1	0	0	0	0	0	0	0	0	1	1	0	0	0	0	0	0	0	0	1	1
Q9Y6W5	Wiskott-Aldrich syndrome protein family member 2	WASF2	0.87408	0.74485	0.88899	0.81607	0.56523	0.87966	0.96808	1.8447	0.82739	0.88692	Q9Y6W5	8	8	8	Wiskott-Aldrich syndrome protein family member 2	WASF2	sp|Q9Y6W5|WASF2_HUMAN Wiskott-Aldrich syndrome protein family member 2 OS=Homo sapiens OX=9606 GN=WASF2 PE=1 SV=3	1	8	8	8	2	6	5	5	1	2	2	3	4	2	2	6	5	5	1	2	2	3	4	2	2	6	5	5	1	2
Q92558	Wiskott-Aldrich syndrome protein family member 1	WASF1	NaN	NaN	NaN	NaN	NaN	NaN	NaN	NaN	1.1489	NaN	Q92558	1	1	1	Wiskott-Aldrich syndrome protein family member 1	WASF1	sp|Q92558|WASF1_HUMAN Wiskott-Aldrich syndrome protein family member 1 OS=Homo sapiens OX=9606 GN=WASF1 PE=1 SV=1	1	1	1	1	0	0	0	0	1	1	0	0	0	0	0	0	0	0	1	1	0	0	0	0	0	0	0	0	1	1
P23381	Tryptophan--tRNA ligase, cytoplasmic;T1-TrpRS;T2-TrpRS	WARS	0.98981	1.011	1.0335	0.92064	0.96541	0.90262	0.83128	0.8536	0.6494	0.64896	P23381	30	30	30	Tryptophan--tRNA ligase, cytoplasmic;T1-TrpRS;T2-TrpRS	WARS	sp|P23381|SYWC_HUMAN Tryptophan--tRNA ligase, cytoplasmic OS=Homo sapiens OX=9606 GN=WARS PE=1 SV=2	1	30	30	30	18	19	18	18	21	22	17	19	21	21	18	19	18	18	21	22	17	19	21	21	18	19	18	18	21	22
Q7Z5K2	Wings apart-like protein homolog	WAPAL	0.80923	0.79086	0.71593	1.0487	1.0114	0.90291	0.92271	0.77195	1.7749	0.84484	Q7Z5K2	19	19	19	Wings apart-like protein homolog	WAPAL	sp|Q7Z5K2|WAPL_HUMAN Wings apart-like protein homolog OS=Homo sapiens OX=9606 GN=WAPL PE=1 SV=1	1	19	19	19	7	6	8	9	4	4	10	12	9	8	7	6	8	9	4	4	10	12	9	8	7	6	8	9	4	4
Q9BTA9	WW domain-containing adapter protein with coiled-coil	WAC	0.93604	1.0652	1.0568	0.86877	1.0254	0.81673	0.95934	0.96592	NaN	1.1269	Q9BTA9	9	9	9	WW domain-containing adapter protein with coiled-coil	WAC	sp|Q9BTA9|WAC_HUMAN WW domain-containing adapter protein with coiled-coil OS=Homo sapiens OX=9606 GN=WAC PE=1 SV=3	1	9	9	9	6	4	4	3	0	1	4	4	5	7	6	4	4	3	0	1	4	4	5	7	6	4	4	3	0	1
Q96SY0	von Willebrand factor A domain-containing protein 9	VWA9	0.99726	0.96615	1.2184	1.0816	1.0034	0.90401	0.83874	1.114	0.99547	1.0874	Q96SY0	8	8	8	von Willebrand factor A domain-containing protein 9	VWA9	sp|Q96SY0|INT14_HUMAN Integrator complex subunit 14 OS=Homo sapiens OX=9606 GN=INTS14 PE=1 SV=2	1	8	8	8	2	2	2	1	4	3	4	2	4	1	2	2	2	1	4	3	4	2	4	1	2	2	2	1	4	3
A3KMH1	von Willebrand factor A domain-containing protein 8	VWA8	1.1857	0.92922	1.2054	1.1385	1.0548	1.1471	1.3839	1.1585	0.9699	0.89923	A3KMH1	14	14	14	von Willebrand factor A domain-containing protein 8	VWA8	sp|A3KMH1|VWA8_HUMAN von Willebrand factor A domain-containing protein 8 OS=Homo sapiens OX=9606 GN=VWA8 PE=1 SV=2	1	14	14	14	6	5	4	3	5	5	8	3	4	3	6	5	4	3	5	5	8	3	4	3	6	5	4	3	5	5
Q9UEU0	Vesicle transport through interaction with t-SNAREs homolog 1B	VTI1B	1.21	1.1925	0.87043	0.82273	0.87093	0.85291	0.84766	1.111	0.92757	0.90033	Q9UEU0	8	8	8	Vesicle transport through interaction with t-SNAREs homolog 1B	VTI1B	sp|Q9UEU0|VTI1B_HUMAN Vesicle transport through interaction with t-SNAREs homolog 1B OS=Homo sapiens OX=9606 GN=VTI1B PE=1 SV=3	1	8	8	8	1	3	3	4	2	3	3	2	2	3	1	3	3	4	2	3	3	2	2	3	1	3	3	4	2	3
Q96AJ9	Vesicle transport through interaction with t-SNAREs homolog 1A	VTI1A	1.1257	0.98929	1.0249	0.88019	1.1468	0.92759	1.4704	1.1136	0.8115	0.72435	Q96AJ9	7	7	7	Vesicle transport through interaction with t-SNAREs homolog 1A	VTI1A	sp|Q96AJ9|VTI1A_HUMAN Vesicle transport through interaction with t-SNAREs homolog 1A OS=Homo sapiens OX=9606 GN=VTI1A PE=1 SV=2	1	7	7	7	3	4	3	4	3	4	3	4	3	3	3	4	3	4	3	4	3	4	3	3	3	4	3	4	3	4
Q9NP79	Vacuolar protein sorting-associated protein VTA1 homolog	VTA1	1.0463	0.96571	1.0335	1.042	0.99216	1.059	1.1142	1.1654	1.2978	1.2316	Q9NP79	10	10	10	Vacuolar protein sorting-associated protein VTA1 homolog	VTA1	sp|Q9NP79|VTA1_HUMAN Vacuolar protein sorting-associated protein VTA1 homolog OS=Homo sapiens OX=9606 GN=VTA1 PE=1 SV=1	1	10	10	10	9	9	9	9	7	7	9	10	8	8	9	9	9	9	7	7	9	10	8	8	9	9	9	9	7	7
P62760;Q9UM19	Visinin-like protein 1	VSNL1	0.7343	1.3284	1.1712	1.075	1.0156	1.1767	3.8209	3.893	1.9393	1.494	P62760	9;3	9;3	9;3	Visinin-like protein 1	VSNL1	sp|P62760|VISL1_HUMAN Visinin-like protein 1 OS=Homo sapiens OX=9606 GN=VSNL1 PE=1 SV=2	2	9	9	9	6	6	4	5	1	3	5	5	1	2	6	6	4	5	1	3	5	5	1	2	6	6	4	5	1	3
Q86Y07	Serine/threonine-protein kinase VRK2	VRK2	0.84133	0.89482	0.90753	0.86469	0.88808	0.90984	1.1936	1.0295	NaN	NaN	Q86Y07	6	6	6	Serine/threonine-protein kinase VRK2	VRK2	sp|Q86Y07|VRK2_HUMAN Serine/threonine-protein kinase VRK2 OS=Homo sapiens OX=9606 GN=VRK2 PE=1 SV=3	1	6	6	6	1	2	1	2	1	2	1	2	3	2	1	2	1	2	1	2	1	2	3	2	1	2	1	2	1	2
Q99986	Serine/threonine-protein kinase VRK1	VRK1	0.99409	1.0729	0.99936	1.0194	1.1048	1.0473	0.78332	0.7952	1.0031	0.97839	Q99986	22	22	22	Serine/threonine-protein kinase VRK1	VRK1	sp|Q99986|VRK1_HUMAN Serine/threonine-protein kinase VRK1 OS=Homo sapiens OX=9606 GN=VRK1 PE=1 SV=1	1	22	22	22	15	11	15	14	13	11	14	15	17	14	15	11	15	14	13	11	14	15	17	14	15	11	15	14	13	11
Q15906	Vacuolar protein sorting-associated protein 72 homolog	VPS72	1.3176	1.2557	NaN	1.0589	NaN	NaN	0.94002	NaN	NaN	NaN	Q15906	1	1	1	Vacuolar protein sorting-associated protein 72 homolog	VPS72	sp|Q15906|VPS72_HUMAN Vacuolar protein sorting-associated protein 72 homolog OS=Homo sapiens OX=9606 GN=VPS72 PE=1 SV=1	1	1	1	1	0	1	1	0	0	0	0	0	1	1	0	1	1	0	0	0	0	0	1	1	0	1	1	0	0	0
Q5VIR6	Vacuolar protein sorting-associated protein 53 homolog	VPS53	0.93218	0.99371	0.95724	0.89472	1.0145	1.0406	0.96423	0.9493	0.97946	1.071	Q5VIR6	5	5	5	Vacuolar protein sorting-associated protein 53 homolog	VPS53	sp|Q5VIR6|VPS53_HUMAN Vacuolar protein sorting-associated protein 53 homolog OS=Homo sapiens OX=9606 GN=VPS53 PE=1 SV=1	1	5	5	5	2	2	1	2	2	1	1	1	1	3	2	2	1	2	2	1	1	1	1	3	2	2	1	2	2	1
Q9UID3	Vacuolar protein sorting-associated protein 51 homolog	VPS51	0.67651	0.80631	0.81066	0.87378	NaN	0.27461	1.0177	0.91732	0.71531	0.74231	Q9UID3	7	7	7	Vacuolar protein sorting-associated protein 51 homolog	VPS51	sp|Q9UID3|VPS51_HUMAN Vacuolar protein sorting-associated protein 51 homolog OS=Homo sapiens OX=9606 GN=VPS51 PE=1 SV=2	1	7	7	7	3	2	2	2	3	2	1	1	1	3	3	2	2	2	3	2	1	1	1	3	3	2	2	2	3	2
O75351	Vacuolar protein sorting-associated protein 4B	VPS4B	0.98212	0.91365	1.0131	0.96875	0.91338	0.89393	1.1423	1.1564	0.97023	1.0932	O75351	18	18	12	Vacuolar protein sorting-associated protein 4B	VPS4B	sp|O75351|VPS4B_HUMAN Vacuolar protein sorting-associated protein 4B OS=Homo sapiens OX=9606 GN=VPS4B PE=1 SV=2	1	18	18	12	10	10	10	9	7	8	9	9	10	10	10	10	10	9	7	8	9	9	10	10	6	6	6	6	6	6
Q9UN37;I3L4J1	Vacuolar protein sorting-associated protein 4A	VPS4A	1.0139	0.88157	0.86555	1.0963	1.1045	1.1374	1.0848	0.99981	1.1142	1.0675	Q9UN37;I3L4J1	17;16	11;10	11;10	Vacuolar protein sorting-associated protein 4A	VPS4A	sp|Q9UN37|VPS4A_HUMAN Vacuolar protein sorting-associated protein 4A OS=Homo sapiens OX=9606 GN=VPS4A PE=1 SV=1;tr|I3L4J1|I3L4J1_HUMAN Uncharacterized protein (Fragment) OS=Homo sapiens OX=9606 PE=1 SV=3	2	17	11	11	12	9	11	8	6	7	9	8	9	7	8	5	7	5	5	5	6	5	6	4	8	5	7	5	5	5
Q9NRW7	Vacuolar protein sorting-associated protein 45	VPS45	1.0285	1.0637	0.81458	1.0318	0.92787	1.1233	1.0766	1.0591	0.82742	0.96372	Q9NRW7	8	8	8	Vacuolar protein sorting-associated protein 45	VPS45	sp|Q9NRW7|VPS45_HUMAN Vacuolar protein sorting-associated protein 45 OS=Homo sapiens OX=9606 GN=VPS45 PE=1 SV=1	1	8	8	8	6	3	2	5	2	2	5	4	3	3	6	3	2	5	2	2	5	4	3	3	6	3	2	5	2	2
Q9H9H4	Vacuolar protein sorting-associated protein 37B	VPS37B	0.84773	1.0075	0.9709	1.166	0.93437	1.2425	0.94106	1.0534	0.37593	0.44839	Q9H9H4	2	2	2	Vacuolar protein sorting-associated protein 37B	VPS37B	sp|Q9H9H4|VP37B_HUMAN Vacuolar protein sorting-associated protein 37B OS=Homo sapiens OX=9606 GN=VPS37B PE=1 SV=1	1	2	2	2	2	2	2	2	1	1	2	2	2	2	2	2	2	2	1	1	2	2	2	2	2	2	2	2	1	1
Q8NEZ2	Vacuolar protein sorting-associated protein 37A	VPS37A	1.0568	0.98298	1.0183	0.97478	0.99521	0.94946	0.90855	0.94308	NaN	NaN	Q8NEZ2	5	5	5	Vacuolar protein sorting-associated protein 37A	VPS37A	sp|Q8NEZ2|VP37A_HUMAN Vacuolar protein sorting-associated protein 37A OS=Homo sapiens OX=9606 GN=VPS37A PE=1 SV=1	1	5	5	5	3	2	3	2	0	2	2	2	3	3	3	2	3	2	0	2	2	2	3	3	3	2	3	2	0	2
Q86VN1	Vacuolar protein-sorting-associated protein 36	VPS36	0.68851	0.72296	1.6347	1.1585	0.91501	1.0386	1.6288	1.6111	1.131	1.1524	Q86VN1	9	9	9	Vacuolar protein-sorting-associated protein 36	VPS36	sp|Q86VN1|VPS36_HUMAN Vacuolar protein-sorting-associated protein 36 OS=Homo sapiens OX=9606 GN=VPS36 PE=1 SV=1	1	9	9	9	8	5	2	4	3	3	2	3	2	3	8	5	2	4	3	3	2	3	2	3	8	5	2	4	3	3
Q96QK1	Vacuolar protein sorting-associated protein 35	VPS35	1.0197	1.0576	1.049	1.0312	1.0129	1.0158	1.1258	1.1772	0.97883	0.94513	Q96QK1	39	39	39	Vacuolar protein sorting-associated protein 35	VPS35	sp|Q96QK1|VPS35_HUMAN Vacuolar protein sorting-associated protein 35 OS=Homo sapiens OX=9606 GN=VPS35 PE=1 SV=2	1	39	39	39	22	25	20	21	20	21	19	22	23	22	22	25	20	21	20	21	19	22	23	22	22	25	20	21	20	21
Q9H267;A0A2R8YDQ0	Vacuolar protein sorting-associated protein 33B	VPS33B	1.2884	0.98874	0.9565	0.98085	0.91034	1.1653	1.211	1.2951	NaN	NaN	Q9H267;A0A2R8YDQ0	9;8	9;8	9;8	Vacuolar protein sorting-associated protein 33B	VPS33B	sp|Q9H267|VP33B_HUMAN Vacuolar protein sorting-associated protein 33B OS=Homo sapiens OX=9606 GN=VPS33B PE=1 SV=2;tr|A0A2R8YDQ0|A0A2R8YDQ0_HUMAN Uncharacterized protein OS=Homo sapiens OX=9606 PE=3 SV=1	2	9	9	9	4	6	3	3	1	1	1	2	6	4	4	6	3	3	1	1	1	2	6	4	4	6	3	3	1	1
H3BMM5;Q96AX1	Vacuolar protein sorting-associated protein 33A	VPS33A	1.0469	1.216	1.0536	0.87925	1.0989	NaN	NaN	2.112	1.112	0.79175	H3BMM5;Q96AX1	11;11	11;11	11;11	Vacuolar protein sorting-associated protein 33A	VPS33A	tr|H3BMM5|H3BMM5_HUMAN Uncharacterized protein OS=Homo sapiens OX=9606 PE=3 SV=1;sp|Q96AX1|VP33A_HUMAN Vacuolar protein sorting-associated protein 33A OS=Homo sapiens OX=9606 GN=VPS33A PE=1 SV=1	2	11	11	11	2	4	0	2	4	5	2	1	2	1	2	4	0	2	4	5	2	1	2	1	2	4	0	2	4	5
Q9UBQ0	Vacuolar protein sorting-associated protein 29	VPS29	1.0302	1.1291	1.0634	0.95485	1.1714	1.203	1.1654	1.3031	0.96786	1.011	Q9UBQ0	10	10	10	Vacuolar protein sorting-associated protein 29	VPS29	sp|Q9UBQ0|VPS29_HUMAN Vacuolar protein sorting-associated protein 29 OS=Homo sapiens OX=9606 GN=VPS29 PE=1 SV=1	1	10	10	10	8	6	6	6	5	6	3	6	6	4	8	6	6	6	5	6	3	6	6	4	8	6	6	6	5	6
Q9UK41	Vacuolar protein sorting-associated protein 28 homolog	VPS28	0.9868	0.94502	1.0574	1.0683	0.94181	0.99646	1.128	1.0499	0.81572	0.82005	Q9UK41	12	12	12	Vacuolar protein sorting-associated protein 28 homolog	VPS28	sp|Q9UK41|VPS28_HUMAN Vacuolar protein sorting-associated protein 28 homolog OS=Homo sapiens OX=9606 GN=VPS28 PE=1 SV=1	1	12	12	12	8	6	8	6	6	5	6	6	7	8	8	6	8	6	6	5	6	6	7	8	8	6	8	6	6	5
Q4G0F5	Vacuolar protein sorting-associated protein 26B	VPS26B	1.041	1.2326	1.2373	1.3231	1.0424	0.83883	1.0771	2.3496	1.3856	NaN	Q4G0F5	7	6	6	Vacuolar protein sorting-associated protein 26B	VPS26B	sp|Q4G0F5|VP26B_HUMAN Vacuolar protein sorting-associated protein 26B OS=Homo sapiens OX=9606 GN=VPS26B PE=1 SV=2	1	7	6	6	1	1	1	2	2	2	1	3	2	1	1	1	1	2	2	2	1	2	2	1	1	1	1	2	2	2
O75436	Vacuolar protein sorting-associated protein 26A	VPS26A	1.0093	1.0855	0.97397	1.0125	1.0089	0.99155	1.082	1.164	0.82482	0.8401	O75436	16	16	15	Vacuolar protein sorting-associated protein 26A	VPS26A	sp|O75436|VP26A_HUMAN Vacuolar protein sorting-associated protein 26A OS=Homo sapiens OX=9606 GN=VPS26A PE=1 SV=2	1	16	16	15	9	7	8	8	8	8	8	8	11	8	9	7	8	8	8	8	8	8	11	8	9	7	8	8	8	8
Q9BRG1	Vacuolar protein-sorting-associated protein 25	VPS25	1.0217	0.8966	0.94898	0.8278	0.97763	0.86699	1.2314	1.2119	0.99164	1.0767	Q9BRG1	11	11	11	Vacuolar protein-sorting-associated protein 25	VPS25	sp|Q9BRG1|VPS25_HUMAN Vacuolar protein-sorting-associated protein 25 OS=Homo sapiens OX=9606 GN=VPS25 PE=1 SV=1	1	11	11	11	6	7	5	5	4	4	6	6	4	3	6	7	5	5	4	4	6	6	4	3	6	7	5	5	4	4
Q9P253	Vacuolar protein sorting-associated protein 18 homolog	VPS18	0.92501	0.81241	0.9246	1.078	0.62958	0.77671	0.7904	0.96042	0.77453	1.1963	Q9P253	7	7	7	Vacuolar protein sorting-associated protein 18 homolog	VPS18	sp|Q9P253|VPS18_HUMAN Vacuolar protein sorting-associated protein 18 homolog OS=Homo sapiens OX=9606 GN=VPS18 PE=1 SV=2	1	7	7	7	4	4	2	3	3	4	2	4	3	2	4	4	2	3	3	4	2	4	3	2	4	4	2	3	3	4
Q9H269	Vacuolar protein sorting-associated protein 16 homolog	VPS16	1.1473	1.0494	1.1113	1.4347	1.3006	1.1238	1.1515	1.5768	0.96361	0.90951	Q9H269	3	3	3	Vacuolar protein sorting-associated protein 16 homolog	VPS16	sp|Q9H269|VPS16_HUMAN Vacuolar protein sorting-associated protein 16 homolog OS=Homo sapiens OX=9606 GN=VPS16 PE=1 SV=2	1	3	3	3	3	3	3	2	1	1	2	3	3	3	3	3	3	2	1	1	2	3	3	3	3	3	3	2	1	1
Q709C8	Vacuolar protein sorting-associated protein 13C	VPS13C	0.71247	NaN	1.129	0.65367	1.2007	0.53485	1.0972	1.549	0.80419	3.8001	Q709C8	11	11	11	Vacuolar protein sorting-associated protein 13C	VPS13C	sp|Q709C8|VP13C_HUMAN Vacuolar protein sorting-associated protein 13C OS=Homo sapiens OX=9606 GN=VPS13C PE=1 SV=1	1	11	11	11	2	2	1	1	3	2	1	2	1	0	2	2	1	1	3	2	1	2	1	0	2	2	1	1	3	2
Q96RL7	Vacuolar protein sorting-associated protein 13A	VPS13A	0.27662	NaN	NaN	NaN	NaN	NaN	NaN	NaN	NaN	NaN	Q96RL7	2	2	2	Vacuolar protein sorting-associated protein 13A	VPS13A	sp|Q96RL7|VP13A_HUMAN Vacuolar protein sorting-associated protein 13A OS=Homo sapiens OX=9606 GN=VPS13A PE=1 SV=2	1	2	2	2	0	0	0	0	1	1	0	0	1	0	0	0	0	0	1	1	0	0	1	0	0	0	0	0	1	1
Q9H270	Vacuolar protein sorting-associated protein 11 homolog	VPS11	1.6752	3.0382	NaN	NaN	NaN	NaN	NaN	NaN	NaN	1.5826	Q9H270	4	4	4	Vacuolar protein sorting-associated protein 11 homolog	VPS11	sp|Q9H270|VPS11_HUMAN Vacuolar protein sorting-associated protein 11 homolog OS=Homo sapiens OX=9606 GN=VPS11 PE=1 SV=1	1	4	4	4	0	0	0	0	1	2	0	0	1	1	0	0	0	0	1	2	0	0	1	1	0	0	0	0	1	2
Q9Y4B6	Protein VPRBP	VPRBP	0.98298	1.048	1.0007	0.99738	0.9315	1.0003	0.95665	1.3112	1.1452	1.1203	Q9Y4B6	30	30	30	Protein VPRBP	VPRBP	sp|Q9Y4B6|DCAF1_HUMAN DDB1- and CUL4-associated factor 1 OS=Homo sapiens OX=9606 GN=DCAF1 PE=1 SV=3	1	30	30	30	13	11	11	10	7	6	15	21	10	8	13	11	11	10	7	6	15	21	10	8	13	11	11	10	7	6
Q96GC9	Vacuole membrane protein 1	VMP1	0.99307	0.98077	0.94251	0.96012	1.1796	1.0057	0.98645	0.92942	0.77513	0.83184	Q96GC9	4	4	4	Vacuole membrane protein 1	VMP1	sp|Q96GC9|VMP1_HUMAN Vacuole membrane protein 1 OS=Homo sapiens OX=9606 GN=VMP1 PE=1 SV=1	1	4	4	4	2	2	2	2	2	1	3	2	3	2	2	2	2	2	2	1	3	2	3	2	2	2	2	2	2	1
Q3ZAQ7	Vacuolar ATPase assembly integral membrane protein VMA21	VMA21	2.0481	NaN	1.0116	0.34765	0.99539	0.96242	1.6537	4.3089	0.90197	0.85248	Q3ZAQ7	3	3	3	Vacuolar ATPase assembly integral membrane protein VMA21	VMA21	sp|Q3ZAQ7|VMA21_HUMAN Vacuolar ATPase assembly integral membrane protein VMA21 OS=Homo sapiens OX=9606 GN=VMA21 PE=1 SV=1	1	3	3	3	3	2	3	2	1	1	1	2	3	0	3	2	3	2	1	1	1	2	3	0	3	2	3	2	1	1
Q8N0U8	Vitamin K epoxide reductase complex subunit 1-like protein 1	VKORC1L1	1.9239	2.3472	2.0592	1.6703	1.2876	1.8676	1.0665	2.733	NaN	NaN	Q8N0U8	3	3	3	Vitamin K epoxide reductase complex subunit 1-like protein 1	VKORC1L1	sp|Q8N0U8|VKORL_HUMAN Vitamin K epoxide reductase complex subunit 1-like protein 1 OS=Homo sapiens OX=9606 GN=VKORC1L1 PE=1 SV=2	1	3	3	3	1	1	2	1	0	0	2	2	1	1	1	1	2	1	0	0	2	2	1	1	1	1	2	1	0	0
E9PLN8;Q9BQB6	Vitamin K epoxide reductase complex subunit 1	VKORC1	NaN	1.2037	NaN	1.2783	1.2219	1.3323	NaN	NaN	1.1986	1.2268	E9PLN8;Q9BQB6	1;1	1;1	1;1	Vitamin K epoxide reductase complex subunit 1	VKORC1	tr|E9PLN8|E9PLN8_HUMAN Uncharacterized protein (Fragment) OS=Homo sapiens OX=9606 PE=4 SV=1;sp|Q9BQB6|VKOR1_HUMAN Vitamin K epoxide reductase complex subunit 1 OS=Homo sapiens OX=9606 GN=VKORC1 PE=1 SV=1	2	1	1	1	0	1	0	0	1	1	1	1	0	1	0	1	0	0	1	1	1	1	0	1	0	1	0	0	1	1
Q9H9C1	Spermatogenesis-defective protein 39 homolog	VIPAS39	NaN	1.1229	0.7522	0.96649	1.1488	NaN	0.98566	1.0283	0.86417	NaN	Q9H9C1	5	5	5	Spermatogenesis-defective protein 39 homolog	VIPAS39	sp|Q9H9C1|SPE39_HUMAN Spermatogenesis-defective protein 39 homolog OS=Homo sapiens OX=9606 GN=VIPAS39 PE=1 SV=1	1	5	5	5	2	3	1	1	1	0	1	1	1	1	2	3	1	1	1	0	1	1	1	1	2	3	1	1	1	0
Q9BQE4	Selenoprotein S	VIMP	0.85703	0.89057	1.0037	0.90328	0.79283	0.90997	1.1038	0.94302	NaN	NaN	Q9BQE4	2	2	2	Selenoprotein S	VIMP	sp|Q9BQE4|SELS_HUMAN Selenoprotein S OS=Homo sapiens OX=9606 GN=SELENOS PE=1 SV=3	1	2	2	2	1	1	1	1	0	0	1	1	2	1	1	1	1	1	0	0	1	1	2	1	1	1	1	1	0	0
P08670	Vimentin	VIM	NaN	NaN	NaN	NaN	NaN	NaN	1.397	1.2163	0.097912	NaN	P08670	5	2	2	Vimentin	VIM	sp|P08670|VIME_HUMAN Vimentin OS=Homo sapiens OX=9606 GN=VIM PE=1 SV=4	1	5	2	2	3	3	4	4	3	2	3	3	3	3	0	0	1	1	1	0	0	0	0	0	0	0	1	1	1	0
Q14119	Vascular endothelial zinc finger 1	VEZF1	0.83626	1.2279	1.2242	1.1468	1.0988	1.0144	1.1663	1.2866	NaN	2.517	Q14119	4	4	4	Vascular endothelial zinc finger 1	VEZF1	sp|Q14119|VEZF1_HUMAN Vascular endothelial zinc finger 1 OS=Homo sapiens OX=9606 GN=VEZF1 PE=1 SV=2	1	4	4	4	2	1	2	2	1	2	2	2	1	1	2	1	2	2	1	2	2	2	1	1	2	1	2	2	1	2
Q9Y277	Voltage-dependent anion-selective channel protein 3	VDAC3	1.0367	1.0339	1.0822	1.0507	1.032	1.0851	0.91366	0.89765	0.94822	0.97653	Q9Y277	14	14	14	Voltage-dependent anion-selective channel protein 3	VDAC3	sp|Q9Y277|VDAC3_HUMAN Voltage-dependent anion-selective channel protein 3 OS=Homo sapiens OX=9606 GN=VDAC3 PE=1 SV=1	1	14	14	14	9	9	9	9	8	9	9	8	10	11	9	9	9	9	8	9	9	8	10	11	9	9	9	9	8	9
P45880	Voltage-dependent anion-selective channel protein 2	VDAC2	1.0457	1.1063	1.0588	1.1145	1.099	1.0836	1.0859	1.0834	0.9536	0.95482	P45880	20	20	20	Voltage-dependent anion-selective channel protein 2	VDAC2	sp|P45880|VDAC2_HUMAN Voltage-dependent anion-selective channel protein 2 OS=Homo sapiens OX=9606 GN=VDAC2 PE=1 SV=2	1	20	20	20	14	15	13	15	13	10	13	14	15	14	14	15	13	15	13	10	13	14	15	14	14	15	13	15	13	10
P21796	Voltage-dependent anion-selective channel protein 1	VDAC1	1.0129	1.0718	1.0195	1.078	1.078	1.1014	0.99426	0.97198	0.89876	0.92302	P21796	23	23	23	Voltage-dependent anion-selective channel protein 1	VDAC1	sp|P21796|VDAC1_HUMAN Voltage-dependent anion-selective channel protein 1 OS=Homo sapiens OX=9606 GN=VDAC1 PE=1 SV=2	1	23	23	23	17	18	16	18	16	19	16	18	18	19	17	18	16	18	16	19	16	18	18	19	17	18	16	18	16	19
Q9H867	Protein-lysine methyltransferase METTL21D	VCPKMT	1.2156	1.8364	1.4889	1.8067	1.1464	1.3527	1.2049	1.3129	1.2469	0.99691	Q9H867	1	1	1	Protein-lysine methyltransferase METTL21D	VCPKMT	sp|Q9H867|MT21D_HUMAN Protein-lysine methyltransferase METTL21D OS=Homo sapiens OX=9606 GN=VCPKMT PE=1 SV=2	1	1	1	1	1	1	1	1	1	1	1	1	1	1	1	1	1	1	1	1	1	1	1	1	1	1	1	1	1	1
Q96JH7	Deubiquitinating protein VCIP135	VCPIP1	1.0549	0.97364	0.9856	0.9815	1.0526	1.0534	1.0172	1.0141	1.091	0.83203	Q96JH7	23	23	23	Deubiquitinating protein VCIP135	VCPIP1	sp|Q96JH7|VCIP1_HUMAN Deubiquitinating protein VCIP135 OS=Homo sapiens OX=9606 GN=VCPIP1 PE=1 SV=2	1	23	23	23	10	14	13	10	7	5	9	10	11	11	10	14	13	10	7	5	9	10	11	11	10	14	13	10	7	5
P55072	Transitional endoplasmic reticulum ATPase	VCP	0.95891	0.96136	0.9774	0.975	0.97827	0.96905	1.0024	1.0293	0.96169	0.93382	P55072	76	76	76	Transitional endoplasmic reticulum ATPase	VCP	sp|P55072|TERA_HUMAN Transitional endoplasmic reticulum ATPase OS=Homo sapiens OX=9606 GN=VCP PE=1 SV=4	1	76	76	76	41	41	44	40	53	48	37	42	45	43	41	41	44	40	53	48	37	42	45	43	41	41	44	40	53	48
P18206	Vinculin	VCL	1.0733	1.0535	1.0397	1.0291	1.0959	1.0759	1.4753	1.5002	1.171	1.1596	P18206	73	73	73	Vinculin	VCL	sp|P18206|VINC_HUMAN Vinculin OS=Homo sapiens OX=9606 GN=VCL PE=1 SV=4	1	73	73	73	49	49	43	49	36	36	46	46	42	44	49	49	43	49	36	36	46	46	42	44	49	49	43	49	36	36
P13611	Versican core protein	VCAN	1.1899	1.1678	NaN	1.9191	NaN	NaN	0.66652	NaN	NaN	NaN	P13611	4	4	4	Versican core protein	VCAN	sp|P13611|CSPG2_HUMAN Versican core protein OS=Homo sapiens OX=9606 GN=VCAN PE=1 SV=3	1	4	4	4	0	1	2	1	0	0	0	0	1	2	0	1	2	1	0	0	0	0	1	2	0	1	2	1	0	0
P61758	Prefoldin subunit 3	VBP1	1.0328	0.95156	1.0211	0.9717	0.97378	1.0287	0.96296	1.1075	1.0384	1.0597	P61758	16	16	16	Prefoldin subunit 3	VBP1	sp|P61758|PFD3_HUMAN Prefoldin subunit 3 OS=Homo sapiens OX=9606 GN=VBP1 PE=1 SV=3	1	16	16	16	8	9	7	8	7	9	7	6	9	9	8	9	7	8	7	9	7	6	9	9	8	9	7	8	7	9
P52735	Guanine nucleotide exchange factor VAV2	VAV2	0.95293	1.054	0.99561	0.99228	1.0675	1.0138	1.5439	1.3892	1.0384	1.6956	P52735	14	14	14	Guanine nucleotide exchange factor VAV2	VAV2	sp|P52735|VAV2_HUMAN Guanine nucleotide exchange factor VAV2 OS=Homo sapiens OX=9606 GN=VAV2 PE=1 SV=2	1	14	14	14	8	8	7	6	6	4	5	8	5	6	8	8	7	6	6	4	5	8	5	6	8	8	7	6	6	4
Q99536	Synaptic vesicle membrane protein VAT-1 homolog	VAT1	1.02	1.0678	0.99396	0.9919	1.0922	1.1114	1.1669	1.1416	1.2049	1.1797	Q99536	21	21	21	Synaptic vesicle membrane protein VAT-1 homolog	VAT1	sp|Q99536|VAT1_HUMAN Synaptic vesicle membrane protein VAT-1 homolog OS=Homo sapiens OX=9606 GN=VAT1 PE=1 SV=2	1	21	21	21	15	17	12	13	12	13	16	14	18	15	15	17	12	13	12	13	16	14	18	15	15	17	12	13	12	13
P50552	Vasodilator-stimulated phosphoprotein	VASP	0.94771	0.98246	0.96192	0.94881	0.95904	0.91981	0.62274	0.61256	1.2903	1.2869	P50552	20	20	20	Vasodilator-stimulated phosphoprotein	VASP	sp|P50552|VASP_HUMAN Vasodilator-stimulated phosphoprotein OS=Homo sapiens OX=9606 GN=VASP PE=1 SV=3	1	20	20	20	11	12	12	11	14	14	12	10	12	13	11	12	12	11	14	14	12	10	12	13	11	12	12	11	14	14
P26640	Valine--tRNA ligase	VARS	0.97454	0.97904	0.98119	0.99991	1.0044	0.99823	0.99624	1.0184	0.97631	0.95738	P26640	70	70	70	Valine--tRNA ligase	VARS	sp|P26640|SYVC_HUMAN Valine--tRNA ligase OS=Homo sapiens OX=9606 GN=VARS PE=1 SV=4	1	70	70	70	47	48	47	47	41	39	45	45	47	45	47	48	47	47	41	39	45	45	47	45	47	48	47	47	41	39
O95292	Vesicle-associated membrane protein-associated protein B/C	VAPB	1.0094	1.004	1.0358	0.98886	1.0349	1.0206	1.2381	1.1772	0.88376	0.95905	O95292	15	14	14	Vesicle-associated membrane protein-associated protein B/C	VAPB	sp|O95292|VAPB_HUMAN Vesicle-associated membrane protein-associated protein B/C OS=Homo sapiens OX=9606 GN=VAPB PE=1 SV=3	1	15	14	14	9	9	8	8	9	10	8	8	7	8	8	8	7	7	8	9	7	7	6	7	8	8	7	7	8	9
Q9P0L0	Vesicle-associated membrane protein-associated protein A	VAPA	0.9993	1.0075	1.0051	0.97007	1.0445	1.0378	0.99106	0.99876	0.84502	0.89568	Q9P0L0	19	19	18	Vesicle-associated membrane protein-associated protein A	VAPA	sp|Q9P0L0|VAPA_HUMAN Vesicle-associated membrane protein-associated protein A OS=Homo sapiens OX=9606 GN=VAPA PE=1 SV=3	1	19	19	18	11	13	12	11	10	12	13	11	13	13	11	13	12	11	10	12	13	11	13	13	10	12	11	10	9	11
Q8TAA9	Vang-like protein 1	VANGL1	NaN	0.96908	0.9697	1.025	1.0777	NaN	1.4246	NaN	NaN	NaN	Q8TAA9	3	3	3	Vang-like protein 1	VANGL1	sp|Q8TAA9|VANG1_HUMAN Vang-like protein 1 OS=Homo sapiens OX=9606 GN=VANGL1 PE=1 SV=1	1	3	3	3	2	2	1	0	1	1	1	0	0	1	2	2	1	0	1	1	1	0	0	1	2	2	1	0	1	1
Q9BV40	Vesicle-associated membrane protein 8	VAMP8	0.62789	0.98842	1.1126	0.77044	0.96405	1.0633	1.1163	1.0237	0.85106	0.8258	Q9BV40	7	7	7	Vesicle-associated membrane protein 8	VAMP8	sp|Q9BV40|VAMP8_HUMAN Vesicle-associated membrane protein 8 OS=Homo sapiens OX=9606 GN=VAMP8 PE=1 SV=1	1	7	7	7	3	2	3	4	2	1	1	4	2	2	3	2	3	4	2	1	1	4	2	2	3	2	3	4	2	1
P51809	Vesicle-associated membrane protein 7	VAMP7	0.89139	0.85582	0.95685	0.85441	0.88293	0.86088	1.3276	1.1022	0.71765	NaN	P51809	3	3	3	Vesicle-associated membrane protein 7	VAMP7	sp|P51809|VAMP7_HUMAN Vesicle-associated membrane protein 7 OS=Homo sapiens OX=9606 GN=VAMP7 PE=1 SV=3	1	3	3	3	2	2	3	2	2	0	2	2	2	2	2	2	3	2	2	0	2	2	2	2	2	2	3	2	2	0
Q15836;P23763	Vesicle-associated membrane protein 3	VAMP3	0.94908	0.9689	1.0522	1.0132	0.95015	1.0099	1.1264	1.1267	0.95356	0.98716	Q15836	8;2	8;2	4;0	Vesicle-associated membrane protein 3	VAMP3	sp|Q15836|VAMP3_HUMAN Vesicle-associated membrane protein 3 OS=Homo sapiens OX=9606 GN=VAMP3 PE=1 SV=3	2	8	8	4	4	4	4	4	6	7	4	3	4	4	4	4	4	4	6	7	4	3	4	4	2	2	2	2	4	4
L7N2F9;P63027	Vesicle-associated membrane protein 2	VAMP2	5.7491	5.6884	4.7094	3.9525	1.8691	1.3099	5.2681	5.4642	1.1618	1.0091	L7N2F9;P63027	7;7	3;3	3;3	Vesicle-associated membrane protein 2	VAMP2	tr|L7N2F9|L7N2F9_HUMAN Uncharacterized protein (Fragment) OS=Homo sapiens OX=9606 PE=4 SV=1;sp|P63027|VAMP2_HUMAN Vesicle-associated membrane protein 2 OS=Homo sapiens OX=9606 GN=VAMP2 PE=1 SV=3	2	7	3	3	3	3	3	3	3	5	3	4	3	3	1	1	1	1	1	2	1	2	1	1	1	1	1	1	1	2
Q08AM6	Protein VAC14 homolog	VAC14	1.0764	1.1028	0.94746	1.0521	0.96194	1.0258	0.81444	1.1566	1.4262	0.51435	Q08AM6	8	8	8	Protein VAC14 homolog	VAC14	sp|Q08AM6|VAC14_HUMAN Protein VAC14 homolog OS=Homo sapiens OX=9606 GN=VAC14 PE=1 SV=1	1	8	8	8	4	4	5	3	2	3	6	4	5	5	4	4	5	3	2	3	6	4	5	5	4	4	5	3	2	3
Q9UBK9	Protein UXT	UXT	1.1354	0.94151	1.0637	0.66441	1.9514	1.0696	1.2318	1.0804	NaN	1.1454	Q9UBK9	3	3	3	Protein UXT	UXT	sp|Q9UBK9|UXT_HUMAN Protein UXT OS=Homo sapiens OX=9606 GN=UXT PE=1 SV=1	1	3	3	3	1	2	2	2	0	1	3	2	1	2	1	2	2	2	0	1	3	2	1	2	1	2	2	2	0	1
Q8NBZ7	UDP-glucuronic acid decarboxylase 1	UXS1	1.553	NaN	NaN	0.99927	NaN	13.211	NaN	NaN	NaN	NaN	Q8NBZ7	2	2	2	UDP-glucuronic acid decarboxylase 1	UXS1	sp|Q8NBZ7|UXS1_HUMAN UDP-glucuronic acid decarboxylase 1 OS=Homo sapiens OX=9606 GN=UXS1 PE=1 SV=1	1	2	2	2	0	1	0	0	0	0	0	1	1	0	0	1	0	0	0	0	0	1	1	0	0	1	0	0	0	0
O95399	Urotensin-2	UTS2	1.1701	NaN	NaN	1.0065	0.98008	1.0611	1.1299	1.156	0.67652	0.676	O95399	1	1	1	Urotensin-2	UTS2	sp|O95399|UTS2_HUMAN Urotensin-2 OS=Homo sapiens OX=9606 GN=UTS2 PE=1 SV=1	1	1	1	1	0	1	1	1	1	1	1	1	1	0	0	1	1	1	1	1	1	1	1	0	0	1	1	1	1	1
P46939;REV__Q14517	Utrophin	UTRN	0.99244	1.2085	1.0945	1.0212	1.0076	1.0078	1.0543	1.217	1.0025	0.99969	P46939	14;1	14;1	14;1	Utrophin	UTRN	sp|P46939|UTRO_HUMAN Utrophin OS=Homo sapiens OX=9606 GN=UTRN PE=1 SV=2	2	14	14	14	7	5	5	4	1	2	3	3	2	5	7	5	5	4	1	2	3	3	2	5	7	5	5	4	1	2
Q9NYH9	U3 small nucleolar RNA-associated protein 6 homolog	UTP6	1.0156	0.99089	0.98187	0.97061	1.059	1.0262	0.84532	0.76934	0.84919	0.87144	Q9NYH9	24	24	24	U3 small nucleolar RNA-associated protein 6 homolog	UTP6	sp|Q9NYH9|UTP6_HUMAN U3 small nucleolar RNA-associated protein 6 homolog OS=Homo sapiens OX=9606 GN=UTP6 PE=2 SV=2	1	24	24	24	14	11	16	12	8	6	12	15	16	11	14	11	16	12	8	6	12	15	16	11	14	11	16	12	8	6
Q9NQZ2	Something about silencing protein 10	UTP3	0.91715	0.93139	0.98715	1.0865	0.93118	0.90033	0.72611	0.71653	0.958	0.8988	Q9NQZ2	16	16	16	Something about silencing protein 10	UTP3	sp|Q9NQZ2|SAS10_HUMAN Something about silencing protein 10 OS=Homo sapiens OX=9606 GN=UTP3 PE=1 SV=1	1	16	16	16	5	7	5	4	8	9	7	5	4	5	5	7	5	4	8	9	7	5	4	5	5	7	5	4	8	9
Q9BRU9	rRNA-processing protein UTP23 homolog	UTP23	0.97697	1.0288	0.92304	1.0178	1.0116	0.93072	0.98683	1.34	NaN	NaN	Q9BRU9	5	5	5	rRNA-processing protein UTP23 homolog	UTP23	sp|Q9BRU9|UTP23_HUMAN rRNA-processing protein UTP23 homolog OS=Homo sapiens OX=9606 GN=UTP23 PE=1 SV=2	1	5	5	5	2	3	4	3	0	0	2	3	4	2	2	3	4	3	0	0	2	3	4	2	2	3	4	3	0	0
O75691	Small subunit processome component 20 homolog	UTP20	1.0179	0.95841	0.97459	1.0758	1.0587	1.0253	0.84672	0.97935	0.91786	0.87667	O75691	37	37	37	Small subunit processome component 20 homolog	UTP20	sp|O75691|UTP20_HUMAN Small subunit processome component 20 homolog OS=Homo sapiens OX=9606 GN=UTP20 PE=1 SV=3	1	37	37	37	11	11	13	13	13	13	16	16	17	16	11	11	13	13	13	13	16	16	17	16	11	11	13	13	13	13
Q9Y5J1	U3 small nucleolar RNA-associated protein 18 homolog	UTP18	0.95874	0.94828	1.0246	0.86578	0.97188	0.90842	0.80655	0.77053	0.93368	0.89357	Q9Y5J1	20	20	20	U3 small nucleolar RNA-associated protein 18 homolog	UTP18	sp|Q9Y5J1|UTP18_HUMAN U3 small nucleolar RNA-associated protein 18 homolog OS=Homo sapiens OX=9606 GN=UTP18 PE=1 SV=3	1	20	20	20	12	13	11	11	10	11	13	15	12	12	12	13	11	11	10	11	13	15	12	12	12	13	11	11	10	11
Q8TED0;REV__Q8TED0	U3 small nucleolar RNA-associated protein 15 homolog	UTP15	0.99208	1.0091	0.95458	0.9876	1.0217	1.059	0.84279	0.90775	1.0722	1.0784	Q8TED0	27;1	27;1	27;1	U3 small nucleolar RNA-associated protein 15 homolog	UTP15	sp|Q8TED0|UTP15_HUMAN U3 small nucleolar RNA-associated protein 15 homolog OS=Homo sapiens OX=9606 GN=UTP15 PE=1 SV=3	2	27	27	27	14	16	16	15	9	12	14	18	20	17	14	16	16	15	9	12	14	18	20	17	14	16	16	15	9	12
Q9BVJ6;Q5TAP6	U3 small nucleolar RNA-associated protein 14 homolog A	UTP14A	0.96466	1.0117	1.0232	0.99365	0.99279	0.92744	0.8541	0.89497	0.91728	0.93332	Q9BVJ6	37;8	37;8	37;8	U3 small nucleolar RNA-associated protein 14 homolog A	UTP14A	sp|Q9BVJ6|UT14A_HUMAN U3 small nucleolar RNA-associated protein 14 homolog A OS=Homo sapiens OX=9606 GN=UTP14A PE=1 SV=1	2	37	37	37	22	20	19	17	12	12	22	24	23	21	22	20	19	17	12	12	22	24	23	21	22	20	19	17	12	12
Q9Y3A2	Probable U3 small nucleolar RNA-associated protein 11	UTP11L	0.66529	0.85021	0.62866	0.93959	0.99178	1.0997	0.83253	0.95567	1.7833	0.79316	Q9Y3A2	9	9	9	Probable U3 small nucleolar RNA-associated protein 11	UTP11L	sp|Q9Y3A2|UTP11_HUMAN Probable U3 small nucleolar RNA-associated protein 11 OS=Homo sapiens OX=9606 GN=UTP11 PE=1 SV=2	1	9	9	9	1	4	4	6	2	3	5	6	1	3	1	4	4	6	2	3	5	6	1	3	1	4	4	6	2	3
Q93008	Probable ubiquitin carboxyl-terminal hydrolase FAF-X	USP9X	1.021	1.0051	1.1082	1.0546	0.88443	0.94329	0.83291	1.3514	0.72153	0.77709	Q93008	35	35	18	Probable ubiquitin carboxyl-terminal hydrolase FAF-X	USP9X	sp|Q93008|USP9X_HUMAN Probable ubiquitin carboxyl-terminal hydrolase FAF-X OS=Homo sapiens OX=9606 GN=USP9X PE=1 SV=3	1	35	35	18	11	11	7	8	16	10	7	11	8	10	11	11	7	8	16	10	7	11	8	10	5	6	3	1	11	7
P40818	Ubiquitin carboxyl-terminal hydrolase 8	USP8	1.0762	1.0789	0.97028	0.96982	0.89015	0.7982	1.0255	0.93629	NaN	NaN	P40818	11	11	11	Ubiquitin carboxyl-terminal hydrolase 8	USP8	sp|P40818|UBP8_HUMAN Ubiquitin carboxyl-terminal hydrolase 8 OS=Homo sapiens OX=9606 GN=USP8 PE=1 SV=1	1	11	11	11	9	6	6	7	0	1	1	1	5	5	9	6	6	7	0	1	1	1	5	5	9	6	6	7	0	1
Q93009;REV__Q86YS3	Ubiquitin carboxyl-terminal hydrolase 7	USP7	0.96546	0.94007	0.97409	1.0069	0.99937	0.98935	0.87303	0.85393	0.99266	0.92877	Q93009	62;1	62;1	62;1	Ubiquitin carboxyl-terminal hydrolase 7	USP7	sp|Q93009|UBP7_HUMAN Ubiquitin carboxyl-terminal hydrolase 7 OS=Homo sapiens OX=9606 GN=USP7 PE=1 SV=2	2	62	62	62	36	36	36	33	30	39	39	38	39	37	36	36	36	33	30	39	39	38	39	37	36	36	36	33	30	39
P45974;REV__Q9UPY3	Ubiquitin carboxyl-terminal hydrolase 5	USP5	1.016	1.0646	0.9664	0.99303	0.962	0.99033	1.258	1.2783	1.0221	1.0308	P45974	46;1	46;1	43;1	Ubiquitin carboxyl-terminal hydrolase 5	USP5	sp|P45974|UBP5_HUMAN Ubiquitin carboxyl-terminal hydrolase 5 OS=Homo sapiens OX=9606 GN=USP5 PE=1 SV=2	2	46	46	43	28	30	30	28	23	23	28	29	29	27	28	30	30	28	23	23	28	29	29	27	26	28	28	26	21	22
Q86UV5	Ubiquitin carboxyl-terminal hydrolase 48	USP48	1.5607	1.0448	3.8067	1.7878	0.97576	0.96336	1.0866	0.92991	1.0814	1.6617	Q86UV5	7	7	7	Ubiquitin carboxyl-terminal hydrolase 48	USP48	sp|Q86UV5|UBP48_HUMAN Ubiquitin carboxyl-terminal hydrolase 48 OS=Homo sapiens OX=9606 GN=USP48 PE=1 SV=1	1	7	7	7	2	3	4	2	2	3	3	4	3	5	2	3	4	2	2	3	3	4	3	5	2	3	4	2	2	3
Q96K76	Ubiquitin carboxyl-terminal hydrolase 47	USP47	1.013	0.9494	1.1326	1.1001	0.87328	1.0495	1.1712	1.1441	1.1598	NaN	Q96K76	8	8	8	Ubiquitin carboxyl-terminal hydrolase 47	USP47	sp|Q96K76|UBP47_HUMAN Ubiquitin carboxyl-terminal hydrolase 47 OS=Homo sapiens OX=9606 GN=USP47 PE=1 SV=3	1	8	8	8	3	2	3	2	2	0	3	3	3	2	3	2	3	2	2	0	3	3	3	2	3	2	3	2	2	0
Q13107	Ubiquitin carboxyl-terminal hydrolase 4	USP4	1.4902	1.1816	1.3262	1.1351	1.0829	1.1265	NaN	1.1943	NaN	1.0324	Q13107	6	4	4	Ubiquitin carboxyl-terminal hydrolase 4	USP4	sp|Q13107|UBP4_HUMAN Ubiquitin carboxyl-terminal hydrolase 4 OS=Homo sapiens OX=9606 GN=USP4 PE=1 SV=3	1	6	4	4	2	3	2	3	1	2	3	4	3	3	1	2	0	1	1	2	2	2	1	1	1	2	0	1	1	2
Q53GS9	U4/U6.U5 tri-snRNP-associated protein 2	USP39	1.0422	1.1017	1.0503	1.0879	1.0677	1.0418	0.92621	0.91487	1.1173	1.079	Q53GS9	23	23	23	U4/U6.U5 tri-snRNP-associated protein 2	USP39	sp|Q53GS9|SNUT2_HUMAN U4/U6.U5 tri-snRNP-associated protein 2 OS=Homo sapiens OX=9606 GN=USP39 PE=1 SV=2	1	23	23	23	10	12	13	12	12	13	13	14	14	14	10	12	13	12	12	13	13	14	14	14	10	12	13	12	12	13
Q9P275	Ubiquitin carboxyl-terminal hydrolase 36	USP36	0.88953	1.0551	0.90783	0.99914	0.9962	1.131	0.92886	0.81295	0.96813	0.95843	Q9P275	16	16	16	Ubiquitin carboxyl-terminal hydrolase 36	USP36	sp|Q9P275|UBP36_HUMAN Ubiquitin carboxyl-terminal hydrolase 36 OS=Homo sapiens OX=9606 GN=USP36 PE=1 SV=4	1	16	16	16	6	9	7	9	3	6	9	9	9	11	6	9	7	9	3	6	9	9	9	11	6	9	7	9	3	6
Q70CQ2	Ubiquitin carboxyl-terminal hydrolase 34	USP34	NaN	1.2094	NaN	2.4847	NaN	NaN	2.9971	0.67488	NaN	NaN	Q70CQ2	2	2	2	Ubiquitin carboxyl-terminal hydrolase 34	USP34	sp|Q70CQ2|UBP34_HUMAN Ubiquitin carboxyl-terminal hydrolase 34 OS=Homo sapiens OX=9606 GN=USP34 PE=1 SV=2	1	2	2	2	0	1	1	1	0	0	0	0	0	2	0	1	1	1	0	0	0	0	0	2	0	1	1	1	0	0
Q8TEY7	Ubiquitin carboxyl-terminal hydrolase 33	USP33	0.95981	0.95114	0.80621	0.92284	0.79795	0.70075	0.97185	0.84848	NaN	NaN	Q8TEY7	4	4	4	Ubiquitin carboxyl-terminal hydrolase 33	USP33	sp|Q8TEY7|UBP33_HUMAN Ubiquitin carboxyl-terminal hydrolase 33 OS=Homo sapiens OX=9606 GN=USP33 PE=1 SV=2	1	4	4	4	2	1	2	3	0	0	2	1	2	2	2	1	2	3	0	0	2	1	2	2	2	1	2	3	0	0
Q9Y6I4	Ubiquitin carboxyl-terminal hydrolase 3	USP3	0.88653	1.0715	0.54887	1.1036	0.98081	1.0123	1.106	0.83589	2.1326	1.3727	Q9Y6I4	9	9	9	Ubiquitin carboxyl-terminal hydrolase 3	USP3	sp|Q9Y6I4|UBP3_HUMAN Ubiquitin carboxyl-terminal hydrolase 3 OS=Homo sapiens OX=9606 GN=USP3 PE=1 SV=2	1	9	9	9	2	2	1	4	5	3	4	2	3	3	2	2	1	4	5	3	4	2	3	3	2	2	1	4	5	3
Q9UPU5	Ubiquitin carboxyl-terminal hydrolase 24	USP24	NaN	0.96079	1.1069	0.96743	0.97847	0.97954	1.5752	2.0294	1.3052	1.3957	Q9UPU5	12	12	12	Ubiquitin carboxyl-terminal hydrolase 24	USP24	sp|Q9UPU5|UBP24_HUMAN Ubiquitin carboxyl-terminal hydrolase 24 OS=Homo sapiens OX=9606 GN=USP24 PE=1 SV=3	1	12	12	12	4	5	3	1	2	2	7	6	0	1	4	5	3	1	2	2	7	6	0	1	4	5	3	1	2	2
Q9UPT9;A6NNY8	Ubiquitin carboxyl-terminal hydrolase 22	USP22	0.87591	0.86043	0.84347	1.0273	1.1062	0.92763	0.93793	0.86712	1.603	1.7171	Q9UPT9	5;2	5;2	5;2	Ubiquitin carboxyl-terminal hydrolase 22	USP22	sp|Q9UPT9|UBP22_HUMAN Ubiquitin carboxyl-terminal hydrolase 22 OS=Homo sapiens OX=9606 GN=USP22 PE=1 SV=2	2	5	5	5	3	2	3	3	1	1	3	2	3	3	3	2	3	3	1	1	3	2	3	3	3	2	3	3	1	1
O94966	Ubiquitin carboxyl-terminal hydrolase 19	USP19	0.98807	0.9947	0.96336	0.89041	0.90657	0.89559	0.94773	0.82651	1.0503	1.0801	O94966	26	26	26	Ubiquitin carboxyl-terminal hydrolase 19	USP19	sp|O94966|UBP19_HUMAN Ubiquitin carboxyl-terminal hydrolase 19 OS=Homo sapiens OX=9606 GN=USP19 PE=1 SV=2	1	26	26	26	11	12	13	12	6	5	11	11	14	13	11	12	13	12	6	5	11	11	14	13	11	12	13	12	6	5
Q9Y5T5	Ubiquitin carboxyl-terminal hydrolase 16	USP16	2.0129	1.1181	1.2994	1.0442	NaN	1.0441	2.1116	1.1041	NaN	1.1757	Q9Y5T5	4	4	4	Ubiquitin carboxyl-terminal hydrolase 16	USP16	sp|Q9Y5T5|UBP16_HUMAN Ubiquitin carboxyl-terminal hydrolase 16 OS=Homo sapiens OX=9606 GN=USP16 PE=1 SV=1	1	4	4	4	1	1	1	2	2	1	0	2	1	1	1	1	1	2	2	1	0	2	1	1	1	1	1	2	2	1
Q9Y4E8	Ubiquitin carboxyl-terminal hydrolase 15	USP15	0.95903	0.95067	1.0017	0.73244	0.88416	0.9762	0.5529	0.42747	0.94523	0.9272	Q9Y4E8	39	39	38	Ubiquitin carboxyl-terminal hydrolase 15	USP15	sp|Q9Y4E8|UBP15_HUMAN Ubiquitin carboxyl-terminal hydrolase 15 OS=Homo sapiens OX=9606 GN=USP15 PE=1 SV=3	1	39	39	38	12	4	15	17	13	12	19	20	24	22	12	4	15	17	13	12	19	20	24	22	12	4	14	16	13	12
P54578	Ubiquitin carboxyl-terminal hydrolase 14	USP14	1.0494	1.0496	1.0042	1.0592	1.0447	1.0219	1.151	1.1054	0.91126	0.91369	P54578	29	29	29	Ubiquitin carboxyl-terminal hydrolase 14	USP14	sp|P54578|UBP14_HUMAN Ubiquitin carboxyl-terminal hydrolase 14 OS=Homo sapiens OX=9606 GN=USP14 PE=1 SV=3	1	29	29	29	19	20	17	17	14	15	19	18	18	21	19	20	17	17	14	15	19	18	18	21	19	20	17	17	14	15
Q92995	Ubiquitin carboxyl-terminal hydrolase 13	USP13	NaN	NaN	NaN	NaN	0.74868	0.96943	1.2097	NaN	1.0186	1.1699	Q92995	9	7	7	Ubiquitin carboxyl-terminal hydrolase 13	USP13	sp|Q92995|UBP13_HUMAN Ubiquitin carboxyl-terminal hydrolase 13 OS=Homo sapiens OX=9606 GN=USP13 PE=1 SV=2	1	9	7	7	2	1	2	1	5	5	3	3	1	1	1	0	1	0	3	4	2	2	0	0	1	0	1	0	3	4
P51784	Ubiquitin carboxyl-terminal hydrolase 11	USP11	1.0114	1.0696	1.0593	1.0036	1.1678	1.089	0.79257	0.83983	0.8444	0.84322	P51784	19	19	18	Ubiquitin carboxyl-terminal hydrolase 11	USP11	sp|P51784|UBP11_HUMAN Ubiquitin carboxyl-terminal hydrolase 11 OS=Homo sapiens OX=9606 GN=USP11 PE=1 SV=3	1	19	19	18	8	7	10	11	8	4	8	8	13	10	8	7	10	11	8	4	8	8	13	10	7	6	9	10	8	4
Q14694	Ubiquitin carboxyl-terminal hydrolase 10	USP10	1.0027	1.0799	1.0057	1.0393	0.98549	0.97141	0.98765	0.98192	1.0944	1.1283	Q14694	25	25	25	Ubiquitin carboxyl-terminal hydrolase 10	USP10	sp|Q14694|UBP10_HUMAN Ubiquitin carboxyl-terminal hydrolase 10 OS=Homo sapiens OX=9606 GN=USP10 PE=1 SV=2	1	25	25	25	19	17	18	17	13	13	18	18	21	18	19	17	18	17	13	13	18	18	21	18	19	17	18	17	13	13
O60763	General vesicular transport factor p115	USO1	1.0134	0.99917	0.97357	0.9825	1.0021	1.0009	0.9781	0.98001	0.81906	0.80342	O60763	42	42	41	General vesicular transport factor p115	USO1	sp|O60763|USO1_HUMAN General vesicular transport factor p115 OS=Homo sapiens OX=9606 GN=USO1 PE=1 SV=2	1	42	42	41	26	27	29	30	26	23	28	27	29	28	26	27	29	30	26	23	28	27	29	28	25	26	28	29	25	22
Q96IX5	Up-regulated during skeletal muscle growth protein 5	USMG5	1.05	1.0642	1.057	1.0595	1.0985	1.1209	1.044	0.98858	1.0859	1.106	Q96IX5	4	4	4	Up-regulated during skeletal muscle growth protein 5	USMG5	sp|Q96IX5|USMG5_HUMAN Up-regulated during skeletal muscle growth protein 5 OS=Homo sapiens OX=9606 GN=ATP5MD PE=1 SV=1	1	4	4	4	2	2	2	2	3	3	2	2	2	2	2	2	2	2	3	3	2	2	2	2	2	2	2	2	3	3
P22415	Upstream stimulatory factor 1	USF1	NaN	NaN	NaN	0.8309	NaN	NaN	NaN	0.67111	NaN	NaN	P22415	1	1	1	Upstream stimulatory factor 1	USF1	sp|P22415|USF1_HUMAN Upstream stimulatory factor 1 OS=Homo sapiens OX=9606 GN=USF1 PE=1 SV=1	1	1	1	1	0	1	0	1	0	0	0	1	0	0	0	1	0	1	0	0	0	1	0	0	0	1	0	1	0	0
Q9NZ43	Vesicle transport protein USE1	USE1	NaN	NaN	NaN	6.5714	NaN	NaN	NaN	NaN	NaN	NaN	Q9NZ43	1	1	1	Vesicle transport protein USE1	USE1	sp|Q9NZ43|USE1_HUMAN Vesicle transport protein USE1 OS=Homo sapiens OX=9606 GN=USE1 PE=1 SV=2	1	1	1	1	0	1	0	0	0	0	0	0	0	0	0	1	0	0	0	0	0	0	0	0	0	1	0	0	0	0
P06132	Uroporphyrinogen decarboxylase	UROD	0.97654	0.98204	1.0729	1.0003	1.0216	0.86383	0.98642	1.1384	0.79816	0.93584	P06132	17	17	17	Uroporphyrinogen decarboxylase	UROD	sp|P06132|DCUP_HUMAN Uroporphyrinogen decarboxylase OS=Homo sapiens OX=9606 GN=UROD PE=1 SV=2	1	17	17	17	8	7	6	5	11	7	5	6	8	7	8	7	6	5	11	7	5	6	8	7	8	7	6	5	11	7
Q9BTM9	Ubiquitin-related modifier 1	URM1	1.5709	1.1364	1.1444	1.294	1.0003	1.1708	1.2066	0.79691	NaN	NaN	Q9BTM9	2	2	2	Ubiquitin-related modifier 1	URM1	sp|Q9BTM9|URM1_HUMAN Ubiquitin-related modifier 1 OS=Homo sapiens OX=9606 GN=URM1 PE=1 SV=1	1	2	2	2	1	1	2	2	0	0	1	2	1	1	1	1	2	2	0	0	1	2	1	1	1	1	2	2	0	0
O94763	Unconventional prefoldin RPB5 interactor 1	URI1	NaN	NaN	0.33639	NaN	0.90187	0.6822	NaN	0.46578	NaN	NaN	O94763	4	4	4	Unconventional prefoldin RPB5 interactor 1	URI1	sp|O94763|RMP_HUMAN Unconventional prefoldin RPB5 interactor 1 OS=Homo sapiens OX=9606 GN=URI1 PE=1 SV=3	1	4	4	4	2	0	0	2	0	0	1	2	0	0	2	0	0	2	0	0	1	2	0	0	2	0	0	2	0	0
Q14146	Unhealthy ribosome biogenesis protein 2 homolog	URB2	0.78096	0.88589	0.79493	0.96523	0.71541	0.94938	0.78563	0.80751	1.0246	1.028	Q14146	14	14	14	Unhealthy ribosome biogenesis protein 2 homolog	URB2	sp|Q14146|URB2_HUMAN Unhealthy ribosome biogenesis protein 2 homolog OS=Homo sapiens OX=9606 GN=URB2 PE=2 SV=2	1	14	14	14	6	4	5	7	3	3	6	7	9	8	6	4	5	7	3	3	6	7	9	8	6	4	5	7	3	3
O60287	Nucleolar pre-ribosomal-associated protein 1	URB1	0.95183	1.0536	1.0875	1.1156	0.98183	1.0071	0.8074	0.72469	1.1911	0.99608	O60287	33	33	33	Nucleolar pre-ribosomal-associated protein 1	URB1	sp|O60287|NPA1P_HUMAN Nucleolar pre-ribosomal-associated protein 1 OS=Homo sapiens OX=9606 GN=URB1 PE=1 SV=4	1	33	33	33	10	5	11	11	10	11	9	13	16	12	10	5	11	11	10	11	9	13	16	12	10	5	11	11	10	11
O14949	Cytochrome b-c1 complex subunit 8	UQCRQ	0.88945	0.93539	1.0868	0.99152	0.81268	1.0191	1.048	1.0113	0.7247	0.74057	O14949	6	6	6	Cytochrome b-c1 complex subunit 8	UQCRQ	sp|O14949|QCR8_HUMAN Cytochrome b-c1 complex subunit 8 OS=Homo sapiens OX=9606 GN=UQCRQ PE=1 SV=4	1	6	6	6	2	2	2	2	5	5	2	3	2	2	2	2	2	2	5	5	2	3	2	2	2	2	2	2	5	5
P07919;A0A096LP55	Cytochrome b-c1 complex subunit 6, mitochondrial	UQCRH	0.91612	0.9079	1.0235	0.91905	0.89764	0.90702	0.91749	1.073	0.89366	0.86438	P07919	5;2	5;2	4;1	Cytochrome b-c1 complex subunit 6, mitochondrial	UQCRH	sp|P07919|QCR6_HUMAN Cytochrome b-c1 complex subunit 6, mitochondrial OS=Homo sapiens OX=9606 GN=UQCRH PE=1 SV=2	2	5	5	4	5	5	5	4	3	3	5	5	5	5	5	5	5	4	3	3	5	5	5	5	4	4	4	3	2	2
P47985;P0C7P4	Cytochrome b-c1 complex subunit Rieske, mitochondrial;Cytochrome b-c1 complex subunit 11;Putative cytochrome b-c1 complex subunit Rieske-like protein 1	UQCRFS1;UQCRFS1P1	1.0374	1.0064	1.0257	1.0414	1.0917	1.0642	1.031	1.0894	0.80502	0.78393	P47985;P0C7P4	13;9	13;9	13;9	Cytochrome b-c1 complex subunit Rieske, mitochondrial;Cytochrome b-c1 complex subunit 11;Putative cytochrome b-c1 complex subunit Rieske-like protein 1	UQCRFS1;UQCRFS1P1	sp|P47985|UCRI_HUMAN Cytochrome b-c1 complex subunit Rieske, mitochondrial OS=Homo sapiens OX=9606 GN=UQCRFS1 PE=1 SV=2;sp|P0C7P4|UCRIL_HUMAN Putative cytochrome b-c1 complex subunit Rieske-like protein 1 OS=Homo sapiens OX=9606 GN=UQCRFS1P1 PE=5 SV=1	2	13	13	13	10	8	9	10	5	5	10	10	9	9	10	8	9	10	5	5	10	10	9	9	10	8	9	10	5	5
P22695	Cytochrome b-c1 complex subunit 2, mitochondrial	UQCRC2	1.1107	1.0717	1.096	1.1466	1.1716	1.128	1.0909	1.1022	0.85485	0.81399	P22695	22	22	22	Cytochrome b-c1 complex subunit 2, mitochondrial	UQCRC2	sp|P22695|QCR2_HUMAN Cytochrome b-c1 complex subunit 2, mitochondrial OS=Homo sapiens OX=9606 GN=UQCRC2 PE=1 SV=3	1	22	22	22	16	17	16	15	16	18	15	15	17	16	16	17	16	15	16	18	15	15	17	16	16	17	16	15	16	18
P31930	Cytochrome b-c1 complex subunit 1, mitochondrial	UQCRC1	1.0591	1.0796	1.0512	1.0569	1.0848	1.0964	1.1087	1.1036	0.86309	0.88558	P31930	25	25	24	Cytochrome b-c1 complex subunit 1, mitochondrial	UQCRC1	sp|P31930|QCR1_HUMAN Cytochrome b-c1 complex subunit 1, mitochondrial OS=Homo sapiens OX=9606 GN=UQCRC1 PE=1 SV=3	1	25	25	24	16	13	15	14	22	20	16	15	16	16	16	13	15	14	22	20	16	15	16	16	15	13	15	13	21	19
P14927	Cytochrome b-c1 complex subunit 7	UQCRB	1.0287	1.0213	1.1653	1.0949	1.1156	1.1645	1.0855	1.0834	0.73018	0.73167	P14927	10	10	10	Cytochrome b-c1 complex subunit 7	UQCRB	sp|P14927|QCR7_HUMAN Cytochrome b-c1 complex subunit 7 OS=Homo sapiens OX=9606 GN=UQCRB PE=1 SV=2	1	10	10	10	7	6	5	7	6	4	7	6	5	7	7	6	5	7	6	4	7	6	5	7	7	6	5	7	6	4
Q9UDW1	Cytochrome b-c1 complex subunit 9	UQCR10	1.2654	1.5163	1.5778	1.3235	1.3946	1.346	1.3767	1.154	0.91311	0.89481	Q9UDW1	2	2	2	Cytochrome b-c1 complex subunit 9	UQCR10	sp|Q9UDW1|QCR9_HUMAN Cytochrome b-c1 complex subunit 9 OS=Homo sapiens OX=9606 GN=UQCR10 PE=1 SV=3	1	2	2	2	2	2	2	2	2	1	2	2	2	2	2	2	2	2	2	1	2	2	2	2	2	2	2	2	2	1
Q6UW78	Ubiquinol-cytochrome-c reductase complex assembly factor 3	UQCC3	1.2409	1.0688	1.2004	NaN	1.002	1.0717	NaN	NaN	NaN	NaN	Q6UW78	2	2	2	Ubiquinol-cytochrome-c reductase complex assembly factor 3	UQCC3	sp|Q6UW78|UQCC3_HUMAN Ubiquinol-cytochrome-c reductase complex assembly factor 3 OS=Homo sapiens OX=9606 GN=UQCC3 PE=1 SV=2	1	2	2	2	1	0	0	0	0	1	1	1	1	1	1	0	0	0	0	1	1	1	1	1	1	0	0	0	0	1
Q9BRT2	Ubiquinol-cytochrome-c reductase complex assembly factor 2	UQCC2	1.1319	1.0331	1.2333	1.1659	1.2073	0.70232	1.2555	1.1901	1.0065	1.0143	Q9BRT2	5	5	5	Ubiquinol-cytochrome-c reductase complex assembly factor 2	UQCC2	sp|Q9BRT2|UQCC2_HUMAN Ubiquinol-cytochrome-c reductase complex assembly factor 2 OS=Homo sapiens OX=9606 GN=UQCC2 PE=1 SV=1	1	5	5	5	2	2	2	3	1	1	2	2	3	3	2	2	2	3	1	1	2	2	3	3	2	2	2	3	1	1
Q9NVA1	Ubiquinol-cytochrome-c reductase complex assembly factor 1	UQCC1	1.1834	NaN	NaN	NaN	1.1261	NaN	0.96189	NaN	1.558	NaN	Q9NVA1	2	2	2	Ubiquinol-cytochrome-c reductase complex assembly factor 1	UQCC1	sp|Q9NVA1|UQCC1_HUMAN Ubiquinol-cytochrome-c reductase complex assembly factor 1 OS=Homo sapiens OX=9606 GN=UQCC1 PE=1 SV=3	1	2	2	2	0	0	1	0	1	1	1	0	1	0	0	0	1	0	1	1	1	0	1	0	0	0	1	0	1	1
Q16831	Uridine phosphorylase 1	UPP1	1.0767	1.1462	1.2099	0.90432	1.0242	0.93036	1.1035	0.76134	0.38305	NaN	Q16831	5	5	5	Uridine phosphorylase 1	UPP1	sp|Q16831|UPP1_HUMAN Uridine phosphorylase 1 OS=Homo sapiens OX=9606 GN=UPP1 PE=1 SV=1	1	5	5	5	2	1	2	3	1	0	3	5	2	3	2	1	2	3	1	0	3	5	2	3	2	1	2	3	1	0
Q9BZI7	Regulator of nonsense transcripts 3B	UPF3B	1.0491	0.95689	0.95989	0.94731	0.82854	0.88148	1.0525	0.8831	1.0248	1.06	Q9BZI7	7	7	7	Regulator of nonsense transcripts 3B	UPF3B	sp|Q9BZI7|REN3B_HUMAN Regulator of nonsense transcripts 3B OS=Homo sapiens OX=9606 GN=UPF3B PE=1 SV=1	1	7	7	7	4	3	4	2	3	2	5	5	4	3	4	3	4	2	3	2	5	5	4	3	4	3	4	2	3	2
Q9HAU5	Regulator of nonsense transcripts 2	UPF2	0.91782	1.0815	0.91846	1.0147	0.88406	0.87406	0.8916	0.89618	0.78709	1.1252	Q9HAU5	9	9	9	Regulator of nonsense transcripts 2	UPF2	sp|Q9HAU5|RENT2_HUMAN Regulator of nonsense transcripts 2 OS=Homo sapiens OX=9606 GN=UPF2 PE=1 SV=1	1	9	9	9	5	5	5	4	4	2	3	4	5	5	5	5	5	4	4	2	3	4	5	5	5	5	5	4	4	2
Q92900	Regulator of nonsense transcripts 1	UPF1	1.024	1.0405	1.0182	1.0635	1.0358	1.0878	0.98158	0.99739	1.0438	1.0835	Q92900	58	58	58	Regulator of nonsense transcripts 1	UPF1	sp|Q92900|RENT1_HUMAN Regulator of nonsense transcripts 1 OS=Homo sapiens OX=9606 GN=UPF1 PE=1 SV=2	1	58	58	58	34	37	36	34	32	33	39	38	38	36	34	37	36	34	32	33	39	38	38	36	34	37	36	34	32	33
Q9C0B0	RING finger protein unkempt homolog	UNK	1.0145	0.90708	0.95943	1.119	0.98494	0.96783	0.87987	1.0838	0.98545	1.1286	Q9C0B0	3	3	3	RING finger protein unkempt homolog	UNK	sp|Q9C0B0|UNK_HUMAN RING finger protein unkempt homolog OS=Homo sapiens OX=9606 GN=UNK PE=1 SV=2	1	3	3	3	1	1	1	1	2	2	1	1	1	1	1	1	1	1	2	2	1	1	1	1	1	1	1	1	2	2
P13051	Uracil-DNA glycosylase	UNG	0.8819	1.038	0.805	1.0426	0.75003	1.0259	0.89086	0.87797	1.8487	1.7924	P13051	6	6	6	Uracil-DNA glycosylase	UNG	sp|P13051|UNG_HUMAN Uracil-DNA glycosylase OS=Homo sapiens OX=9606 GN=UNG PE=1 SV=2	1	6	6	6	3	2	5	2	3	2	3	2	2	3	3	2	5	2	3	2	3	2	2	3	3	2	5	2	3	2
Q9H1C4	Protein unc-93 homolog B1	UNC93B1	NaN	2.3764	NaN	2.0553	NaN	NaN	NaN	2.4585	NaN	0.8683	Q9H1C4	3	3	3	Protein unc-93 homolog B1	UNC93B1	sp|Q9H1C4|UN93B_HUMAN Protein unc-93 homolog B1 OS=Homo sapiens OX=9606 GN=UNC93B1 PE=1 SV=2	1	3	3	3	0	1	0	2	1	1	1	0	0	1	0	1	0	2	1	1	1	0	0	1	0	1	0	2	1	1
Q53HI1	Protein unc-50 homolog	UNC50	NaN	NaN	NaN	1.2405	NaN	NaN	NaN	NaN	NaN	NaN	Q53HI1	1	1	1	Protein unc-50 homolog	UNC50	sp|Q53HI1|UNC50_HUMAN Protein unc-50 homolog OS=Homo sapiens OX=9606 GN=UNC50 PE=1 SV=2	1	1	1	1	0	1	0	0	0	0	0	0	0	0	0	1	0	0	0	0	0	0	0	0	0	1	0	0	0	0
Q9H3U1	Protein unc-45 homolog A	UNC45A	0.9983	1.066	1.0465	1.0291	1.0224	1.0508	1.0963	1.0935	1.2638	1.1388	Q9H3U1	47	47	47	Protein unc-45 homolog A	UNC45A	sp|Q9H3U1|UN45A_HUMAN Protein unc-45 homolog A OS=Homo sapiens OX=9606 GN=UNC45A PE=1 SV=1	1	47	47	47	26	30	25	25	18	24	26	25	26	26	26	30	25	25	18	24	26	25	26	26	26	30	25	25	18	24
A6NIH7;Q13432	Protein unc-119 homolog B	UNC119B	0.86928	0.87579	1.0259	1.2349	0.72695	1.0664	1.1426	0.95381	NaN	NaN	A6NIH7	4;1	4;1	4;1	Protein unc-119 homolog B	UNC119B	sp|A6NIH7|U119B_HUMAN Protein unc-119 homolog B OS=Homo sapiens OX=9606 GN=UNC119B PE=1 SV=1	2	4	4	4	4	1	2	1	0	0	1	1	1	2	4	1	2	1	0	0	1	1	1	2	4	1	2	1	0	0
P11172	Uridine 5-monophosphate synthase;Orotate phosphoribosyltransferase;Orotidine 5-phosphate decarboxylase	UMPS	1.013	1.0717	0.94996	1.0452	1.057	1.0949	0.81023	0.81377	1.0698	1.0513	P11172	28	28	28	Uridine 5-monophosphate synthase;Orotate phosphoribosyltransferase;Orotidine 5-phosphate decarboxylase	UMPS	sp|P11172|UMPS_HUMAN Uridine 5-monophosphate synthase OS=Homo sapiens OX=9606 GN=UMPS PE=1 SV=1	1	28	28	28	17	16	19	19	15	16	19	19	20	19	17	16	19	19	15	16	19	19	20	19	17	16	19	19	15	16
Q9BZM5;Q5VY80;Q6H3X3	NKG2D ligand 2;Retinoic acid early transcript 1L protein;Retinoic acid early transcript 1G protein	ULBP2;RAET1L;RAET1G	1.3486	1.3739	1.2034	1.0093	1.7165	NaN	1.8259	1.7082	0.64213	NaN	Q9BZM5;Q5VY80;Q6H3X3	2;1;1	2;1;1	2;1;1	NKG2D ligand 2;Retinoic acid early transcript 1L protein;Retinoic acid early transcript 1G protein	ULBP2;RAET1L;RAET1G	sp|Q9BZM5|ULBP2_HUMAN UL16-binding protein 2 OS=Homo sapiens OX=9606 GN=ULBP2 PE=1 SV=1;sp|Q5VY80|ULBP6_HUMAN UL16-binding protein 6 OS=Homo sapiens OX=9606 GN=RAET1L PE=1 SV=1;sp|Q6H3X3|ULBP5_HUMAN UL-16 binding protein 5 OS=Homo sapiens OX=9606 GN=RAET1G	3	2	2	2	1	2	2	1	1	0	1	1	1	1	1	2	2	1	1	0	1	1	1	1	1	2	2	1	1	0
Q96PU4	E3 ubiquitin-protein ligase UHRF2	UHRF2	0.69683	NaN	NaN	0.45824	0.86164	0.89765	0.68064	NaN	1.5072	1.2365	Q96PU4	8	5	5	E3 ubiquitin-protein ligase UHRF2	UHRF2	sp|Q96PU4|UHRF2_HUMAN E3 ubiquitin-protein ligase UHRF2 OS=Homo sapiens OX=9606 GN=UHRF2 PE=1 SV=1	1	8	5	5	2	4	4	3	3	3	4	4	3	2	0	1	1	0	2	2	2	2	1	0	0	1	1	0	2	2
A0JNW5	UHRF1-binding protein 1-like	UHRF1BP1L	1.2223	0.99527	1.0102	0.8935	0.94092	0.91675	1.1189	0.99562	0.84742	NaN	A0JNW5	2	2	2	UHRF1-binding protein 1-like	UHRF1BP1L	sp|A0JNW5|UH1BL_HUMAN UHRF1-binding protein 1-like OS=Homo sapiens OX=9606 GN=UHRF1BP1L PE=1 SV=2	1	2	2	2	1	1	1	1	1	0	1	2	1	1	1	1	1	1	1	0	1	2	1	1	1	1	1	1	1	0
Q96T88	E3 ubiquitin-protein ligase UHRF1	UHRF1	1.0086	0.96446	0.97541	1.0132	1.0024	0.95972	0.83501	0.84342	1.2204	1.2222	Q96T88	36	36	33	E3 ubiquitin-protein ligase UHRF1	UHRF1	sp|Q96T88|UHRF1_HUMAN E3 ubiquitin-protein ligase UHRF1 OS=Homo sapiens OX=9606 GN=UHRF1 PE=1 SV=1	1	36	36	33	25	21	24	22	15	16	21	22	23	23	25	21	24	22	15	16	21	22	23	23	23	18	21	19	14	15
Q8TAS1	Serine/threonine-protein kinase Kist	UHMK1	NaN	0.77822	NaN	NaN	0.51095	NaN	0.73725	NaN	NaN	NaN	Q8TAS1	1	1	1	Serine/threonine-protein kinase Kist	UHMK1	sp|Q8TAS1|UHMK1_HUMAN Serine/threonine-protein kinase Kist OS=Homo sapiens OX=9606 GN=UHMK1 PE=1 SV=2	1	1	1	1	0	0	1	0	0	0	1	0	0	1	0	0	1	0	0	0	1	0	0	1	0	0	1	0	0	0
Q16880	2-hydroxyacylsphingosine 1-beta-galactosyltransferase	UGT8	1.2385	1.1801	1.1471	1.2824	1.3599	1.2503	1.8909	1.9346	NaN	NaN	Q16880	4	4	4	2-hydroxyacylsphingosine 1-beta-galactosyltransferase	UGT8	sp|Q16880|CGT_HUMAN 2-hydroxyacylsphingosine 1-beta-galactosyltransferase OS=Homo sapiens OX=9606 GN=UGT8 PE=2 SV=2	1	4	4	4	4	2	1	1	0	0	1	1	1	1	4	2	1	1	0	0	1	1	1	1	4	2	1	1	0	0
P22309	UDP-glucuronosyltransferase 1-1	UGT1A1	NaN	NaN	NaN	NaN	NaN	NaN	NaN	NaN	1.1719	1.1689	P22309	1	1	1	UDP-glucuronosyltransferase 1-1	UGT1A1	sp|P22309|UD11_HUMAN UDP-glucuronosyltransferase 1-1 OS=Homo sapiens OX=9606 GN=UGT1A1 PE=1 SV=1	1	1	1	1	0	0	0	0	1	1	0	0	0	0	0	0	0	0	1	1	0	0	0	0	0	0	0	0	1	1
Q16851	UTP--glucose-1-phosphate uridylyltransferase	UGP2	1.0778	1.0964	1.0104	1.0533	1.1327	1.1319	1.4462	1.4936	0.81501	0.76087	Q16851	19	19	19	UTP--glucose-1-phosphate uridylyltransferase	UGP2	sp|Q16851|UGPA_HUMAN UTP--glucose-1-phosphate uridylyltransferase OS=Homo sapiens OX=9606 GN=UGP2 PE=1 SV=5	1	19	19	19	16	15	15	13	6	7	9	8	14	12	16	15	15	13	6	7	9	8	14	12	16	15	15	13	6	7
Q9NYU2	UDP-glucose:glycoprotein glucosyltransferase 1	UGGT1	1.0928	1.1179	1.0462	1.0388	1.0532	1.0664	1.2203	1.2121	1.0108	0.98368	Q9NYU2	52	52	50	UDP-glucose:glycoprotein glucosyltransferase 1	UGGT1	sp|Q9NYU2|UGGG1_HUMAN UDP-glucose:glycoprotein glucosyltransferase 1 OS=Homo sapiens OX=9606 GN=UGGT1 PE=1 SV=3	1	52	52	50	33	29	34	32	28	24	35	28	30	28	33	29	34	32	28	24	35	28	30	28	31	27	33	31	28	23
O60701	UDP-glucose 6-dehydrogenase	UGDH	1.0196	1.0697	1.0286	1.058	1.0078	1.069	1.3508	1.3142	0.78077	0.85651	O60701	28	28	28	UDP-glucose 6-dehydrogenase	UGDH	sp|O60701|UGDH_HUMAN UDP-glucose 6-dehydrogenase OS=Homo sapiens OX=9606 GN=UGDH PE=1 SV=1	1	28	28	28	17	17	16	15	17	19	16	18	16	16	17	17	16	15	17	19	16	18	16	16	17	17	16	15	17	19
Q9NUQ7	Ufm1-specific protease 2	UFSP2	1.162	1.1275	2.6532	1.1134	0.95442	1.0871	0.85205	1.1695	0.797	0.75963	Q9NUQ7	6	6	6	Ufm1-specific protease 2	UFSP2	sp|Q9NUQ7|UFSP2_HUMAN Ufm1-specific protease 2 OS=Homo sapiens OX=9606 GN=UFSP2 PE=1 SV=3	1	6	6	6	1	2	3	1	2	3	1	2	3	1	1	2	3	1	2	3	1	2	3	1	1	2	3	1	2	3
P61960	Ubiquitin-fold modifier 1	UFM1	0.9312	0.99543	0.90709	1.0623	0.98457	0.91173	1.1494	0.95753	0.87179	0.91796	P61960	5	5	5	Ubiquitin-fold modifier 1	UFM1	sp|P61960|UFM1_HUMAN Ubiquitin-fold modifier 1 OS=Homo sapiens OX=9606 GN=UFM1 PE=1 SV=1	1	5	5	5	4	3	4	5	1	1	4	4	4	4	4	3	4	5	1	1	4	4	4	4	4	3	4	5	1	1
O94874	E3 UFM1-protein ligase 1	UFL1	1.1059	0.97107	1.0991	1.0307	1.079	1.1104	1.3654	1.3417	0.91181	0.97428	O94874	20	20	19	E3 UFM1-protein ligase 1	UFL1	sp|O94874|UFL1_HUMAN E3 UFM1-protein ligase 1 OS=Homo sapiens OX=9606 GN=UFL1 PE=1 SV=2	1	20	20	19	10	10	14	10	7	9	11	12	8	12	10	10	14	10	7	9	11	12	8	12	9	9	13	9	7	9
Q92890	Ubiquitin fusion degradation protein 1 homolog	UFD1L	0.94363	0.96954	0.96689	0.97705	0.98315	0.96885	1.0366	1.0712	0.86494	0.86159	Q92890	16	16	16	Ubiquitin fusion degradation protein 1 homolog	UFD1L	sp|Q92890|UFD1_HUMAN Ubiquitin recognition factor in ER-associated degradation protein 1 OS=Homo sapiens OX=9606 GN=UFD1 PE=1 SV=3	1	16	16	16	10	8	11	11	9	9	11	8	12	13	10	8	11	11	9	9	11	8	12	13	10	8	11	11	9	9
Q9Y3C8	Ubiquitin-fold modifier-conjugating enzyme 1	UFC1	0.97277	0.82533	1.0187	0.97728	0.8963	0.9404	1.1909	1.1832	1.2735	1.2058	Q9Y3C8	4	4	4	Ubiquitin-fold modifier-conjugating enzyme 1	UFC1	sp|Q9Y3C8|UFC1_HUMAN Ubiquitin-fold modifier-conjugating enzyme 1 OS=Homo sapiens OX=9606 GN=UFC1 PE=1 SV=3	1	4	4	4	4	4	4	4	2	2	4	4	4	3	4	4	4	4	2	2	4	4	4	3	4	4	4	4	2	2
Q8IX04	Ubiquitin-conjugating enzyme E2 variant 3	UEVLD	NaN	0.26372	NaN	NaN	0.38238	0.31495	NaN	0.48181	NaN	NaN	Q8IX04	1	1	1	Ubiquitin-conjugating enzyme E2 variant 3	UEVLD	sp|Q8IX04|UEVLD_HUMAN Ubiquitin-conjugating enzyme E2 variant 3 OS=Homo sapiens OX=9606 GN=UEVLD PE=1 SV=2	1	1	1	1	0	0	0	1	0	0	1	1	0	1	0	0	0	1	0	0	1	1	0	1	0	0	0	1	0	0
Q9NWZ5	Uridine-cytidine kinase-like 1	UCKL1	0.96452	1.0224	1.0565	1.0124	1.1022	1.0244	0.80479	1.1262	NaN	NaN	Q9NWZ5	6	6	6	Uridine-cytidine kinase-like 1	UCKL1	sp|Q9NWZ5|UCKL1_HUMAN Uridine-cytidine kinase-like 1 OS=Homo sapiens OX=9606 GN=UCKL1 PE=1 SV=2	1	6	6	6	3	3	2	2	0	0	3	3	4	2	3	3	2	2	0	0	3	3	4	2	3	3	2	2	0	0
Q9BZX2;Q9HA47	Uridine-cytidine kinase 2	UCK2	0.999	1.0517	0.90649	0.96856	0.9327	0.92905	0.6776	0.70387	1.4217	1.0834	Q9BZX2	10;1	10;1	10;1	Uridine-cytidine kinase 2	UCK2	sp|Q9BZX2|UCK2_HUMAN Uridine-cytidine kinase 2 OS=Homo sapiens OX=9606 GN=UCK2 PE=1 SV=1	2	10	10	10	6	5	8	6	4	6	6	6	8	6	6	5	8	6	4	6	6	6	8	6	6	5	8	6	4	6
Q9Y5K5	Ubiquitin carboxyl-terminal hydrolase isozyme L5	UCHL5	1.0765	1.0016	0.97673	1.0309	1.0687	1.0966	1.43	1.3259	0.96553	0.97953	Q9Y5K5	18	18	18	Ubiquitin carboxyl-terminal hydrolase isozyme L5	UCHL5	sp|Q9Y5K5|UCHL5_HUMAN Ubiquitin carboxyl-terminal hydrolase isozyme L5 OS=Homo sapiens OX=9606 GN=UCHL5 PE=1 SV=3	1	18	18	18	13	13	13	13	8	11	13	13	12	13	13	13	13	13	8	11	13	13	12	13	13	13	13	13	8	11
P15374	Ubiquitin carboxyl-terminal hydrolase isozyme L3	UCHL3	1.0128	1.0195	0.99737	1.0241	0.9593	1.0414	1.1329	0.99533	1.0047	1.0693	P15374	10	10	10	Ubiquitin carboxyl-terminal hydrolase isozyme L3	UCHL3	sp|P15374|UCHL3_HUMAN Ubiquitin carboxyl-terminal hydrolase isozyme L3 OS=Homo sapiens OX=9606 GN=UCHL3 PE=1 SV=1	1	10	10	10	7	7	7	6	7	5	6	6	8	8	7	7	7	6	7	5	6	6	8	8	7	7	7	6	7	5
O00124	UBX domain-containing protein 8	UBXN8	0.75686	NaN	1.2936	NaN	NaN	NaN	NaN	NaN	1.9708	NaN	O00124	1	1	1	UBX domain-containing protein 8	UBXN8	sp|O00124|UBXN8_HUMAN UBX domain-containing protein 8 OS=Homo sapiens OX=9606 GN=UBXN8 PE=1 SV=2	1	1	1	1	1	0	0	0	1	0	0	0	1	0	1	0	0	0	1	0	0	0	1	0	1	0	0	0	1	0
O94888	UBX domain-containing protein 7	UBXN7	0.92372	0.96565	1.0382	0.97867	0.85973	1.0925	1.0869	1.2386	0.82804	0.7469	O94888	11	11	11	UBX domain-containing protein 7	UBXN7	sp|O94888|UBXN7_HUMAN UBX domain-containing protein 7 OS=Homo sapiens OX=9606 GN=UBXN7 PE=1 SV=2	1	11	11	11	8	8	7	7	1	2	8	7	7	8	8	8	7	7	1	2	8	7	7	8	8	8	7	7	1	2
Q9BZV1	UBX domain-containing protein 6	UBXN6	NaN	0.98304	1.1337	1.3416	1.8308	1.6887	0.85063	0.96884	NaN	NaN	Q9BZV1	5	5	5	UBX domain-containing protein 6	UBXN6	sp|Q9BZV1|UBXN6_HUMAN UBX domain-containing protein 6 OS=Homo sapiens OX=9606 GN=UBXN6 PE=1 SV=1	1	5	5	5	2	1	1	2	0	1	1	2	0	2	2	1	1	2	0	1	1	2	0	2	2	1	1	2	0	1
Q92575	UBX domain-containing protein 4	UBXN4	1.1242	1.336	0.97649	1.143	1.1581	0.92317	3.0743	1.1655	NaN	NaN	Q92575	5	5	5	UBX domain-containing protein 4	UBXN4	sp|Q92575|UBXN4_HUMAN UBX domain-containing protein 4 OS=Homo sapiens OX=9606 GN=UBXN4 PE=1 SV=2	1	5	5	5	3	3	2	3	1	2	2	2	2	1	3	3	2	3	1	2	2	2	2	1	3	3	2	3	1	2
Q04323	UBX domain-containing protein 1	UBXN1	0.92591	0.96511	0.95351	0.86994	0.92684	0.96818	0.90574	0.84769	0.59458	0.63251	Q04323	11	11	11	UBX domain-containing protein 1	UBXN1	sp|Q04323|UBXN1_HUMAN UBX domain-containing protein 1 OS=Homo sapiens OX=9606 GN=UBXN1 PE=1 SV=2	1	11	11	11	6	6	6	7	6	5	6	6	8	7	6	6	6	7	6	5	6	6	8	7	6	6	6	7	6	5
P17480	Nucleolar transcription factor 1	UBTF	0.99733	1.0056	0.98003	0.95382	1.0477	0.98258	0.78744	0.79066	1.0657	1.0544	P17480	31	31	31	Nucleolar transcription factor 1	UBTF	sp|P17480|UBF1_HUMAN Nucleolar transcription factor 1 OS=Homo sapiens OX=9606 GN=UBTF PE=1 SV=1	1	31	31	31	14	14	13	14	17	17	16	14	19	18	14	14	13	14	17	17	16	14	19	18	14	14	13	14	17	17
Q8N806	Putative E3 ubiquitin-protein ligase UBR7	UBR7	1.0553	0.89163	1.21	0.90394	1.1042	0.97586	0.81311	0.84651	0.82511	1.025	Q8N806	13	13	13	Putative E3 ubiquitin-protein ligase UBR7	UBR7	sp|Q8N806|UBR7_HUMAN Putative E3 ubiquitin-protein ligase UBR7 OS=Homo sapiens OX=9606 GN=UBR7 PE=1 SV=2	1	13	13	13	6	5	4	7	2	2	7	6	9	7	6	5	4	7	2	2	7	6	9	7	6	5	4	7	2	2
O95071	E3 ubiquitin-protein ligase UBR5	UBR5	0.96383	1.0692	0.98548	1.0383	0.98009	1.0561	1.0218	1.1345	1.2945	1.288	O95071	27	27	27	E3 ubiquitin-protein ligase UBR5	UBR5	sp|O95071|UBR5_HUMAN E3 ubiquitin-protein ligase UBR5 OS=Homo sapiens OX=9606 GN=UBR5 PE=1 SV=2	1	27	27	27	10	7	7	9	8	8	12	13	9	8	10	7	7	9	8	8	12	13	9	8	10	7	7	9	8	8
Q5T4S7	E3 ubiquitin-protein ligase UBR4	UBR4	0.99405	1.0487	0.98718	1.046	1.0176	0.99985	1.058	1.0598	0.9456	0.93132	Q5T4S7	83	83	83	E3 ubiquitin-protein ligase UBR4	UBR4	sp|Q5T4S7|UBR4_HUMAN E3 ubiquitin-protein ligase UBR4 OS=Homo sapiens OX=9606 GN=UBR4 PE=1 SV=1	1	83	83	83	41	42	42	39	34	36	41	36	43	42	41	42	42	39	34	36	41	36	43	42	41	42	42	39	34	36
Q6ZT12	E3 ubiquitin-protein ligase UBR3	UBR3	0.92989	1.0987	NaN	NaN	0.89213	NaN	NaN	NaN	1.2037	NaN	Q6ZT12	4	4	4	E3 ubiquitin-protein ligase UBR3	UBR3	sp|Q6ZT12|UBR3_HUMAN E3 ubiquitin-protein ligase UBR3 OS=Homo sapiens OX=9606 GN=UBR3 PE=2 SV=2	1	4	4	4	0	0	0	0	2	0	1	1	1	1	0	0	0	0	2	0	1	1	1	1	0	0	0	0	2	0
Q8IWV8	E3 ubiquitin-protein ligase UBR2	UBR2	0.95296	1.0119	0.98985	0.9914	0.95461	0.9566	0.78955	0.89515	1.0595	1.4486	Q8IWV8	12	12	12	E3 ubiquitin-protein ligase UBR2	UBR2	sp|Q8IWV8|UBR2_HUMAN E3 ubiquitin-protein ligase UBR2 OS=Homo sapiens OX=9606 GN=UBR2 PE=1 SV=1	1	12	12	12	3	2	7	6	2	1	3	1	9	4	3	2	7	6	2	1	3	1	9	4	3	2	7	6	2	1
Q8IWV7	E3 ubiquitin-protein ligase UBR1	UBR1	0.78096	0.99824	0.99419	1.0341	0.99953	0.74637	0.92114	0.9205	0.79361	NaN	Q8IWV7	12	12	12	E3 ubiquitin-protein ligase UBR1	UBR1	sp|Q8IWV7|UBR1_HUMAN E3 ubiquitin-protein ligase UBR1 OS=Homo sapiens OX=9606 GN=UBR1 PE=1 SV=1	1	12	12	12	4	3	6	3	2	2	5	3	4	6	4	3	6	3	2	2	5	3	4	6	4	3	6	3	2	2
Q9NRR5	Ubiquilin-4	UBQLN4	1.0487	0.92606	0.94402	0.82899	0.86946	0.92321	0.75581	0.97067	1.619	1.1557	Q9NRR5	15	11	11	Ubiquilin-4	UBQLN4	sp|Q9NRR5|UBQL4_HUMAN Ubiquilin-4 OS=Homo sapiens OX=9606 GN=UBQLN4 PE=1 SV=2	1	15	11	11	10	9	10	10	4	6	11	11	12	11	7	6	7	7	1	3	8	8	9	8	7	6	7	7	1	3
Q9UHD9	Ubiquilin-2	UBQLN2	0.94167	1.0224	1.0037	0.80924	0.87021	0.88152	0.8858	0.88872	0.91307	1.1193	Q9UHD9	12	8	8	Ubiquilin-2	UBQLN2	sp|Q9UHD9|UBQL2_HUMAN Ubiquilin-2 OS=Homo sapiens OX=9606 GN=UBQLN2 PE=1 SV=2	1	12	8	8	9	9	9	9	7	8	10	8	10	10	5	5	5	5	4	5	6	4	6	6	5	5	5	5	4	5
Q9UMX0	Ubiquilin-1	UBQLN1	0.99392	0.97475	1.0583	0.92057	0.88334	0.97092	1.1074	1.1401	0.97843	0.99529	Q9UMX0	16	16	10	Ubiquilin-1	UBQLN1	sp|Q9UMX0|UBQL1_HUMAN Ubiquilin-1 OS=Homo sapiens OX=9606 GN=UBQLN1 PE=1 SV=2	1	16	16	10	11	11	11	11	12	10	11	11	13	11	11	11	11	11	12	10	11	11	13	11	6	6	6	6	7	5
Q9NZI7	Upstream-binding protein 1	UBP1	NaN	NaN	NaN	NaN	NaN	NaN	0.83319	NaN	0.89345	1.0281	Q9NZI7	4	3	3	Upstream-binding protein 1	UBP1	sp|Q9NZI7|UBIP1_HUMAN Upstream-binding protein 1 OS=Homo sapiens OX=9606 GN=UBP1 PE=1 SV=1	1	4	3	3	1	1	2	1	3	2	1	1	1	1	0	0	1	0	2	1	0	0	0	0	0	0	1	0	2	1
Q6ZU65	Ubinuclein-2	UBN2	NaN	1.4527	1.0395	1.0864	0.93923	1.0027	1.1722	NaN	NaN	NaN	Q6ZU65	2	2	2	Ubinuclein-2	UBN2	sp|Q6ZU65|UBN2_HUMAN Ubinuclein-2 OS=Homo sapiens OX=9606 GN=UBN2 PE=1 SV=2	1	2	2	2	1	1	1	0	0	0	2	1	0	1	1	1	1	0	0	0	2	1	0	1	1	1	1	0	0	0
Q8WVY7	Ubiquitin-like domain-containing CTD phosphatase 1	UBLCP1	0.99844	1.0273	1.0626	1.0383	1.0174	1.007	0.92423	0.87781	0.85822	0.79985	Q8WVY7	19	19	19	Ubiquitin-like domain-containing CTD phosphatase 1	UBLCP1	sp|Q8WVY7|UBCP1_HUMAN Ubiquitin-like domain-containing CTD phosphatase 1 OS=Homo sapiens OX=9606 GN=UBLCP1 PE=1 SV=2	1	19	19	19	8	8	8	9	12	9	10	8	9	8	8	8	8	9	12	9	10	8	9	8	8	8	8	9	12	9
Q96S82	Ubiquitin-like protein 7	UBL7	0.98382	1.0021	1.0373	0.98376	0.89408	0.89479	1.1073	1.1225	0.90235	0.7975	Q96S82	4	4	4	Ubiquitin-like protein 7	UBL7	sp|Q96S82|UBL7_HUMAN Ubiquitin-like protein 7 OS=Homo sapiens OX=9606 GN=UBL7 PE=1 SV=2	1	4	4	4	3	3	3	3	1	2	3	2	1	2	3	3	3	3	1	2	3	2	1	2	3	3	3	3	1	2
Q9BZL1	Ubiquitin-like protein 5	UBL5	1.0023	1.0452	0.99546	0.87052	0.90565	0.78421	0.88692	1.2239	1.7235	1.8903	Q9BZL1	3	3	3	Ubiquitin-like protein 5	UBL5	sp|Q9BZL1|UBL5_HUMAN Ubiquitin-like protein 5 OS=Homo sapiens OX=9606 GN=UBL5 PE=1 SV=1	1	3	3	3	2	1	2	2	2	1	1	1	1	1	2	1	2	2	2	1	1	1	1	1	2	1	2	2	2	1
P11441	Ubiquitin-like protein 4A	UBL4A	0.98344	1.0033	1.0356	0.89421	0.85414	0.92421	0.83202	0.84019	2.1401	1.4124	P11441	5	5	5	Ubiquitin-like protein 4A	UBL4A	sp|P11441|UBL4A_HUMAN Ubiquitin-like protein 4A OS=Homo sapiens OX=9606 GN=UBL4A PE=1 SV=1	1	5	5	5	5	4	5	4	3	2	5	4	5	5	5	4	5	4	3	2	5	4	5	5	5	4	5	4	3	2
O14562	Ubiquitin domain-containing protein UBFD1	UBFD1	0.88092	0.84588	0.85755	0.9227	0.75784	0.88449	0.94492	1.1667	0.72819	1.1917	O14562	10	10	10	Ubiquitin domain-containing protein UBFD1	UBFD1	sp|O14562|UBFD1_HUMAN Ubiquitin domain-containing protein UBFD1 OS=Homo sapiens OX=9606 GN=UBFD1 PE=1 SV=2	1	10	10	10	6	5	6	5	5	4	6	5	5	5	6	5	6	5	5	4	6	5	5	5	6	5	6	5	5	4
O95155	Ubiquitin conjugation factor E4 B	UBE4B	0.88998	0.85522	0.94098	0.74472	0.85589	0.87244	0.96322	0.93313	0.90448	0.70509	O95155	19	19	19	Ubiquitin conjugation factor E4 B	UBE4B	sp|O95155|UBE4B_HUMAN Ubiquitin conjugation factor E4 B OS=Homo sapiens OX=9606 GN=UBE4B PE=1 SV=1	1	19	19	19	10	11	11	10	8	6	7	8	11	8	10	11	11	10	8	6	7	8	11	8	10	11	11	10	8	6
Q14139	Ubiquitin conjugation factor E4 A	UBE4A	0.98543	0.8889	0.92714	1.0394	1.0987	0.90634	1.0925	0.9721	1.1861	1.3711	Q14139	13	13	13	Ubiquitin conjugation factor E4 A	UBE4A	sp|Q14139|UBE4A_HUMAN Ubiquitin conjugation factor E4 A OS=Homo sapiens OX=9606 GN=UBE4A PE=1 SV=2	1	13	13	13	7	7	4	6	3	4	6	8	7	6	7	7	4	6	3	4	6	8	7	6	7	7	4	6	3	4
Q15386	Ubiquitin-protein ligase E3C	UBE3C	1.1645	1.1002	1.1092	0.9332	1.2365	1.3435	1.3017	1.3128	1.7269	1.0924	Q15386	15	15	15	Ubiquitin-protein ligase E3C	UBE3C	sp|Q15386|UBE3C_HUMAN Ubiquitin-protein ligase E3C OS=Homo sapiens OX=9606 GN=UBE3C PE=1 SV=3	1	15	15	15	8	7	8	7	2	4	7	3	6	8	8	7	8	7	2	4	7	3	6	8	8	7	8	7	2	4
Q05086	Ubiquitin-protein ligase E3A	UBE3A	0.944	0.92615	1.0119	1.1344	1.4113	0.92885	0.95529	0.90326	1.2495	1.2348	Q05086	24	24	24	Ubiquitin-protein ligase E3A	UBE3A	sp|Q05086|UBE3A_HUMAN Ubiquitin-protein ligase E3A OS=Homo sapiens OX=9606 GN=UBE3A PE=1 SV=4	1	24	24	24	12	11	9	14	5	7	11	12	11	14	12	11	9	14	5	7	11	12	11	14	12	11	9	14	5	7
Q9H832	Ubiquitin-conjugating enzyme E2 Z	UBE2Z	0.99913	0.98452	1.0239	0.96436	1.0195	1.002	1.0354	1.0453	0.82488	0.81942	Q9H832	14	14	14	Ubiquitin-conjugating enzyme E2 Z	UBE2Z	sp|Q9H832|UBE2Z_HUMAN Ubiquitin-conjugating enzyme E2 Z OS=Homo sapiens OX=9606 GN=UBE2Z PE=1 SV=2	1	14	14	14	11	12	10	11	3	4	11	10	9	10	11	12	10	11	3	4	11	10	9	10	11	12	10	11	3	4
Q15819	Ubiquitin-conjugating enzyme E2 variant 2	UBE2V2	1.0132	0.97735	0.89434	0.91718	1.0264	0.92076	0.94429	0.9406	0.97403	0.91697	Q15819	12	6	6	Ubiquitin-conjugating enzyme E2 variant 2	UBE2V2	sp|Q15819|UB2V2_HUMAN Ubiquitin-conjugating enzyme E2 variant 2 OS=Homo sapiens OX=9606 GN=UBE2V2 PE=1 SV=4	1	12	6	6	6	6	6	6	9	10	7	5	7	5	2	2	2	2	3	5	3	1	3	1	2	2	2	2	3	5
Q13404;I3L0A0	Ubiquitin-conjugating enzyme E2 variant 1	UBE2V1;TMEM189-UBE2V1	1.0033	1.0098	0.99712	1.0014	1.0195	1.0087	1.0134	0.97625	1.0036	0.99643	Q13404;I3L0A0	13;11	13;11	7;5	Ubiquitin-conjugating enzyme E2 variant 1	UBE2V1;TMEM189-UBE2V1	sp|Q13404|UB2V1_HUMAN Ubiquitin-conjugating enzyme E2 variant 1 OS=Homo sapiens OX=9606 GN=UBE2V1 PE=1 SV=2;tr|I3L0A0|I3L0A0_HUMAN HCG2044781 OS=Homo sapiens OX=9606 GN=TMEM189-UBE2V1 PE=4 SV=1	2	13	13	7	7	8	8	8	12	10	8	7	9	8	7	8	8	8	12	10	8	7	9	8	3	4	4	4	6	5
Q9NPD8	Ubiquitin-conjugating enzyme E2 T	UBE2T	1.0069	0.93088	1.0013	0.98377	0.91556	0.88646	0.82441	0.83038	2.4401	2.1794	Q9NPD8	12	12	12	Ubiquitin-conjugating enzyme E2 T	UBE2T	sp|Q9NPD8|UBE2T_HUMAN Ubiquitin-conjugating enzyme E2 T OS=Homo sapiens OX=9606 GN=UBE2T PE=1 SV=1	1	12	12	12	10	9	9	9	4	4	9	9	10	9	10	9	9	9	4	4	9	9	10	9	10	9	9	9	4	4
Q16763	Ubiquitin-conjugating enzyme E2 S	UBE2S	0.9436	1.1116	0.90417	1.0668	0.96957	0.91034	1.1315	1.108	1.4718	1.3745	Q16763	12	12	12	Ubiquitin-conjugating enzyme E2 S	UBE2S	sp|Q16763|UBE2S_HUMAN Ubiquitin-conjugating enzyme E2 S OS=Homo sapiens OX=9606 GN=UBE2S PE=1 SV=2	1	12	12	12	9	9	8	8	6	7	8	8	7	7	9	9	8	8	6	7	8	8	7	7	9	9	8	8	6	7
Q712K3	Ubiquitin-conjugating enzyme E2 R2	UBE2R2	0.8672	0.90208	0.90488	0.93088	0.9669	1.066	0.98816	1.207	NaN	NaN	Q712K3	4	3	3	Ubiquitin-conjugating enzyme E2 R2	UBE2R2	sp|Q712K3|UB2R2_HUMAN Ubiquitin-conjugating enzyme E2 R2 OS=Homo sapiens OX=9606 GN=UBE2R2 PE=1 SV=1	1	4	3	3	3	3	1	2	1	1	2	2	3	2	2	2	1	1	1	1	1	1	2	1	2	2	1	1	1	1
Q7Z7E8;Q8WVN8	Ubiquitin-conjugating enzyme E2 Q1	UBE2Q1	1.0689	1.0286	0.80757	0.82825	0.87708	0.72501	0.57259	0.58082	0.57716	NaN	Q7Z7E8	10;1	10;1	10;1	Ubiquitin-conjugating enzyme E2 Q1	UBE2Q1	sp|Q7Z7E8|UB2Q1_HUMAN Ubiquitin-conjugating enzyme E2 Q1 OS=Homo sapiens OX=9606 GN=UBE2Q1 PE=1 SV=1	2	10	10	10	3	2	7	4	2	0	2	3	6	7	3	2	7	4	2	0	2	3	6	7	3	2	7	4	2	0
Q9C0C9	E2/E3 hybrid ubiquitin-protein ligase UBE2O	UBE2O	0.98065	0.99754	0.98364	0.98384	0.87198	0.93334	0.97778	0.92644	1.325	1.2843	Q9C0C9	42	42	42	E2/E3 hybrid ubiquitin-protein ligase UBE2O	UBE2O	sp|Q9C0C9|UBE2O_HUMAN (E3-independent) E2 ubiquitin-conjugating enzyme OS=Homo sapiens OX=9606 GN=UBE2O PE=1 SV=3	1	42	42	42	27	26	25	25	19	20	26	29	25	25	27	26	25	25	19	20	26	29	25	25	27	26	25	25	19	20
P61088;Q5JXB2	Ubiquitin-conjugating enzyme E2 N	UBE2N	1.028	1.0134	1.0153	0.9884	1.0281	1.0346	1.154	1.1636	1.051	1.033	P61088	14;6	14;6	14;6	Ubiquitin-conjugating enzyme E2 N	UBE2N	sp|P61088|UBE2N_HUMAN Ubiquitin-conjugating enzyme E2 N OS=Homo sapiens OX=9606 GN=UBE2N PE=1 SV=1	2	14	14	14	8	8	8	8	13	13	8	8	8	8	8	8	8	8	13	13	8	8	8	8	8	8	8	8	13	13
P61081	NEDD8-conjugating enzyme Ubc12	UBE2M	0.98004	0.97607	1.0153	1.0042	1.0158	0.934	1.0094	0.97476	0.86695	0.94989	P61081	11	11	11	NEDD8-conjugating enzyme Ubc12	UBE2M	sp|P61081|UBC12_HUMAN NEDD8-conjugating enzyme Ubc12 OS=Homo sapiens OX=9606 GN=UBE2M PE=1 SV=1	1	11	11	11	9	9	7	8	7	6	8	8	9	8	9	9	7	8	7	6	8	8	9	8	9	9	7	8	7	6
O14933	Ubiquitin/ISG15-conjugating enzyme E2 L6	UBE2L6	0.99845	0.80058	1.0002	0.74442	NaN	NaN	0.80628	0.95495	NaN	NaN	O14933	1	1	1	Ubiquitin/ISG15-conjugating enzyme E2 L6	UBE2L6	sp|O14933|UB2L6_HUMAN Ubiquitin/ISG15-conjugating enzyme E2 L6 OS=Homo sapiens OX=9606 GN=UBE2L6 PE=1 SV=4	1	1	1	1	1	1	1	1	0	0	0	0	1	1	1	1	1	1	0	0	0	0	1	1	1	1	1	1	0	0
P68036;A0A1B0GUS4	Ubiquitin-conjugating enzyme E2 L3	UBE2L3	1.0218	0.9763	1.0369	0.96528	0.98365	1.0605	0.9829	1.0311	1.0371	1.0529	P68036	11;5	11;5	11;5	Ubiquitin-conjugating enzyme E2 L3	UBE2L3	sp|P68036|UB2L3_HUMAN Ubiquitin-conjugating enzyme E2 L3 OS=Homo sapiens OX=9606 GN=UBE2L3 PE=1 SV=1	2	11	11	11	6	6	5	7	7	7	6	6	5	5	6	6	5	7	7	7	6	6	5	5	6	6	5	7	7	7
P61086	Ubiquitin-conjugating enzyme E2 K	UBE2K	1.0889	1.0591	1.0284	1.027	1.0192	1.0368	0.95607	0.94596	0.88411	0.85929	P61086	14	14	14	Ubiquitin-conjugating enzyme E2 K	UBE2K	sp|P61086|UBE2K_HUMAN Ubiquitin-conjugating enzyme E2 K OS=Homo sapiens OX=9606 GN=UBE2K PE=1 SV=3	1	14	14	14	11	9	10	9	8	10	9	10	10	9	11	9	10	9	8	10	9	10	10	9	11	9	10	9	8	10
Q9Y385	Ubiquitin-conjugating enzyme E2 J1	UBE2J1	NaN	0.68485	NaN	NaN	0.24286	NaN	1.5347	1.1886	NaN	NaN	Q9Y385	1	1	1	Ubiquitin-conjugating enzyme E2 J1	UBE2J1	sp|Q9Y385|UB2J1_HUMAN Ubiquitin-conjugating enzyme E2 J1 OS=Homo sapiens OX=9606 GN=UBE2J1 PE=1 SV=2	1	1	1	1	0	0	1	1	0	0	1	0	0	1	0	0	1	1	0	0	1	0	0	1	0	0	1	1	0	0
P63279	SUMO-conjugating enzyme UBC9	UBE2I	1.024	1.0775	1.0461	1.0478	1.0157	1.0313	1.0867	1.1406	1.1655	1.1402	P63279	15	15	15	SUMO-conjugating enzyme UBC9	UBE2I	sp|P63279|UBC9_HUMAN SUMO-conjugating enzyme UBC9 OS=Homo sapiens OX=9606 GN=UBE2I PE=1 SV=1	1	15	15	15	10	10	8	10	8	9	10	11	11	11	10	10	8	10	8	9	10	11	11	11	10	10	8	10	8	9
P62256	Ubiquitin-conjugating enzyme E2 H	UBE2H	0.91191	0.93865	0.85992	1.0196	0.86954	1.0098	1.3812	1.3206	1.968	1.9852	P62256	6	6	6	Ubiquitin-conjugating enzyme E2 H	UBE2H	sp|P62256|UBE2H_HUMAN Ubiquitin-conjugating enzyme E2 H OS=Homo sapiens OX=9606 GN=UBE2H PE=1 SV=1	1	6	6	6	4	3	3	3	4	2	3	3	4	3	4	3	3	3	4	2	3	3	4	3	4	3	3	3	4	2
P60604	Ubiquitin-conjugating enzyme E2 G2	UBE2G2	0.95283	0.93689	0.91833	0.86749	0.88216	0.88051	0.99637	0.9793	1.2002	1.1207	P60604	6	6	6	Ubiquitin-conjugating enzyme E2 G2	UBE2G2	sp|P60604|UB2G2_HUMAN Ubiquitin-conjugating enzyme E2 G2 OS=Homo sapiens OX=9606 GN=UBE2G2 PE=1 SV=1	1	6	6	6	4	4	4	4	3	4	4	4	4	4	4	4	4	4	3	4	4	4	4	4	4	4	4	4	3	4
P62253	Ubiquitin-conjugating enzyme E2 G1;Ubiquitin-conjugating enzyme E2 G1, N-terminally processed	UBE2G1	0.96867	1.0001	1.0295	0.98261	1.0173	0.95891	0.94312	0.95559	1.0963	0.9188	P62253	8	8	8	Ubiquitin-conjugating enzyme E2 G1;Ubiquitin-conjugating enzyme E2 G1, N-terminally processed	UBE2G1	sp|P62253|UB2G1_HUMAN Ubiquitin-conjugating enzyme E2 G1 OS=Homo sapiens OX=9606 GN=UBE2G1 PE=1 SV=3	1	8	8	8	5	3	4	3	1	3	4	4	6	5	5	3	4	3	1	3	4	4	6	5	5	3	4	3	1	3
Q96LR5;Q969T4	Ubiquitin-conjugating enzyme E2 E2;Ubiquitin-conjugating enzyme E2 E3	UBE2E2;UBE2E3	0.99528	0.97655	0.93014	1.0288	0.98328	0.99683	0.78045	0.81125	1.2421	1.1123	Q96LR5;Q969T4	7;5	7;5	4;2	Ubiquitin-conjugating enzyme E2 E2;Ubiquitin-conjugating enzyme E2 E3	UBE2E2;UBE2E3	sp|Q96LR5|UB2E2_HUMAN Ubiquitin-conjugating enzyme E2 E2 OS=Homo sapiens OX=9606 GN=UBE2E2 PE=1 SV=1;sp|Q969T4|UB2E3_HUMAN Ubiquitin-conjugating enzyme E2 E3 OS=Homo sapiens OX=9606 GN=UBE2E3 PE=1 SV=1	2	7	7	4	3	4	5	5	3	2	4	4	4	6	3	4	5	5	3	2	4	4	4	6	1	2	3	3	2	2
P51965	Ubiquitin-conjugating enzyme E2 E1	UBE2E1	1.1108	1.1381	1.2629	1.0243	1.0985	1.0455	0.87345	0.80824	1.6295	1.775	P51965	5	2	2	Ubiquitin-conjugating enzyme E2 E1	UBE2E1	sp|P51965|UB2E1_HUMAN Ubiquitin-conjugating enzyme E2 E1 OS=Homo sapiens OX=9606 GN=UBE2E1 PE=1 SV=1	1	5	2	2	3	3	3	3	3	2	3	3	3	4	1	1	1	1	2	2	1	1	1	1	1	1	1	1	2	2
Q9Y2X8;P51668	Ubiquitin-conjugating enzyme E2 D4;Ubiquitin-conjugating enzyme E2 D1	UBE2D4;UBE2D1	0.97772	0.87953	0.96544	0.94669	0.92962	0.95491	1.0565	0.98271	1.3403	NaN	Q9Y2X8;P51668	2;2	1;1	1;1	Ubiquitin-conjugating enzyme E2 D4;Ubiquitin-conjugating enzyme E2 D1	UBE2D4;UBE2D1	sp|Q9Y2X8|UB2D4_HUMAN Ubiquitin-conjugating enzyme E2 D4 OS=Homo sapiens OX=9606 GN=UBE2D4 PE=1 SV=1;sp|P51668|UB2D1_HUMAN Ubiquitin-conjugating enzyme E2 D1 OS=Homo sapiens OX=9606 GN=UBE2D1 PE=1 SV=1	2	2	1	1	2	2	2	2	2	1	2	2	2	2	1	1	1	1	1	0	1	1	1	1	1	1	1	1	1	0
P61077	Ubiquitin-conjugating enzyme E2 D3	UBE2D3	1.0267	1.0302	1.0012	1.0174	1.0586	1.013	1.065	1.0168	1.0887	1.0626	P61077	5	5	1	Ubiquitin-conjugating enzyme E2 D3	UBE2D3	sp|P61077|UB2D3_HUMAN Ubiquitin-conjugating enzyme E2 D3 OS=Homo sapiens OX=9606 GN=UBE2D3 PE=1 SV=1	1	5	5	1	3	2	3	2	4	3	2	3	2	2	3	2	3	2	4	3	2	3	2	2	0	0	0	0	1	1
O00762	Ubiquitin-conjugating enzyme E2 C	UBE2C	0.86209	1.0247	0.98672	0.95093	0.89803	0.94827	2.0162	2.1559	2.5249	2.4628	O00762	10	10	10	Ubiquitin-conjugating enzyme E2 C	UBE2C	sp|O00762|UBE2C_HUMAN Ubiquitin-conjugating enzyme E2 C OS=Homo sapiens OX=9606 GN=UBE2C PE=1 SV=1	1	10	10	10	7	7	6	5	4	3	6	5	6	4	7	7	6	5	4	3	6	5	6	4	7	7	6	5	4	3
P63146	Ubiquitin-conjugating enzyme E2 B	UBE2B	1.111	NaN	1.2406	0.67844	NaN	0.65664	1.4049	1.2457	NaN	NaN	P63146	2	1	1	Ubiquitin-conjugating enzyme E2 B	UBE2B	sp|P63146|UBE2B_HUMAN Ubiquitin-conjugating enzyme E2 B OS=Homo sapiens OX=9606 GN=UBE2B PE=1 SV=1	1	2	1	1	2	1	2	2	0	0	2	2	2	1	1	1	1	1	0	0	1	1	1	0	1	1	1	1	0	0
P49459	Ubiquitin-conjugating enzyme E2 A	UBE2A	0.84746	0.76511	0.90005	0.81889	0.79795	0.7275	0.88411	0.78017	NaN	NaN	P49459	2	2	1	Ubiquitin-conjugating enzyme E2 A	UBE2A	sp|P49459|UBE2A_HUMAN Ubiquitin-conjugating enzyme E2 A OS=Homo sapiens OX=9606 GN=UBE2A PE=1 SV=2	1	2	2	1	2	1	2	2	0	0	2	2	2	2	2	1	2	2	0	0	2	2	2	2	1	1	1	1	0	0
Q14157	Ubiquitin-associated protein 2-like	UBAP2L	1.0103	0.977	1.0494	0.92261	0.88211	0.95718	0.94842	0.96387	0.93069	0.90935	Q14157	29	29	29	Ubiquitin-associated protein 2-like	UBAP2L	sp|Q14157|UBP2L_HUMAN Ubiquitin-associated protein 2-like OS=Homo sapiens OX=9606 GN=UBAP2L PE=1 SV=2	1	29	29	29	21	20	19	20	19	22	19	20	22	22	21	20	19	20	19	22	19	20	22	22	21	20	19	20	19	22
Q5T6F2	Ubiquitin-associated protein 2	UBAP2	0.97023	0.9408	1.086	1.0116	1.005	1.1416	0.95324	0.96256	1.1429	1.1657	Q5T6F2	17	17	17	Ubiquitin-associated protein 2	UBAP2	sp|Q5T6F2|UBAP2_HUMAN Ubiquitin-associated protein 2 OS=Homo sapiens OX=9606 GN=UBAP2 PE=1 SV=1	1	17	17	17	12	13	13	12	6	9	10	10	13	9	12	13	13	12	6	9	10	10	13	9	12	13	13	12	6	9
Q9NZ09	Ubiquitin-associated protein 1	UBAP1	1.0709	1.0318	0.94091	1.1	1.049	1.241	0.77496	0.69299	0.72474	NaN	Q9NZ09	5	5	5	Ubiquitin-associated protein 1	UBAP1	sp|Q9NZ09|UBAP1_HUMAN Ubiquitin-associated protein 1 OS=Homo sapiens OX=9606 GN=UBAP1 PE=1 SV=1	1	5	5	5	3	3	3	3	1	1	2	2	4	3	3	3	3	3	1	1	2	2	4	3	3	3	3	3	1	1
Q8NBM4	Ubiquitin-associated domain-containing protein 2	UBAC2	1.1312	1.1626	1.6613	1.3985	1.0759	1.1393	1.4585	1.447	0.96546	1.0359	Q8NBM4	4	4	4	Ubiquitin-associated domain-containing protein 2	UBAC2	sp|Q8NBM4|UBAC2_HUMAN Ubiquitin-associated domain-containing protein 2 OS=Homo sapiens OX=9606 GN=UBAC2 PE=1 SV=1	1	4	4	4	3	2	2	2	2	2	2	1	2	2	3	2	2	2	2	2	2	1	2	2	3	2	2	2	2	2
A0AVT1	Ubiquitin-like modifier-activating enzyme 6	UBA6	1.0234	1.0024	0.98663	0.97602	1.0024	1.009	0.91757	0.90018	0.76871	0.72865	A0AVT1	43	43	43	Ubiquitin-like modifier-activating enzyme 6	UBA6	sp|A0AVT1|UBA6_HUMAN Ubiquitin-like modifier-activating enzyme 6 OS=Homo sapiens OX=9606 GN=UBA6 PE=1 SV=1	1	43	43	43	29	28	28	31	19	16	27	25	30	30	29	28	28	31	19	16	27	25	30	30	29	28	28	31	19	16
P62987	Ubiquitin-60S ribosomal protein L40;Ubiquitin;60S ribosomal protein L40	UBA52	1.1494	1.3354	0.80412	NaN	NaN	NaN	0.92071	NaN	NaN	NaN	P62987	12	1	1	Ubiquitin-60S ribosomal protein L40;Ubiquitin;60S ribosomal protein L40	UBA52	sp|P62987|RL40_HUMAN Ubiquitin-60S ribosomal protein L40 OS=Homo sapiens OX=9606 GN=UBA52 PE=1 SV=2	1	12	1	1	7	6	7	7	10	10	6	6	7	7	1	0	1	0	0	0	0	0	1	1	1	0	1	0	0	0
Q9GZZ9	Ubiquitin-like modifier-activating enzyme 5	UBA5	0.99334	1.1806	1.1126	1.1291	1.1025	1.0614	1.0177	0.78741	0.8558	0.81995	Q9GZZ9	6	6	6	Ubiquitin-like modifier-activating enzyme 5	UBA5	sp|Q9GZZ9|UBA5_HUMAN Ubiquitin-like modifier-activating enzyme 5 OS=Homo sapiens OX=9606 GN=UBA5 PE=1 SV=1	1	6	6	6	4	5	5	4	3	2	6	5	5	5	4	5	5	4	3	2	6	5	5	5	4	5	5	4	3	2
Q8TBC4	NEDD8-activating enzyme E1 catalytic subunit	UBA3	0.97894	1.0121	1.1125	1.035	1.0786	1.2081	1.0181	1.0209	0.81802	0.873	Q8TBC4	18	18	18	NEDD8-activating enzyme E1 catalytic subunit	UBA3	sp|Q8TBC4|UBA3_HUMAN NEDD8-activating enzyme E1 catalytic subunit OS=Homo sapiens OX=9606 GN=UBA3 PE=1 SV=2	1	18	18	18	11	14	13	12	8	8	13	13	15	15	11	14	13	12	8	8	13	13	15	15	11	14	13	12	8	8
Q9UBT2	SUMO-activating enzyme subunit 2	UBA2	1.0711	1.0188	1.024	1.0906	1.045	1.0331	1.1832	1.165	1.2014	1.2068	Q9UBT2	34	34	34	SUMO-activating enzyme subunit 2	UBA2	sp|Q9UBT2|SAE2_HUMAN SUMO-activating enzyme subunit 2 OS=Homo sapiens OX=9606 GN=UBA2 PE=1 SV=2	1	34	34	34	15	20	18	19	19	19	19	23	21	18	15	20	18	19	19	19	19	23	21	18	15	20	18	19	19	19
P22314	Ubiquitin-like modifier-activating enzyme 1	UBA1	1.0073	1.0083	0.99134	0.99893	1.0212	0.99535	1.022	1.0137	1.0711	1.0694	P22314	62	62	62	Ubiquitin-like modifier-activating enzyme 1	UBA1	sp|P22314|UBA1_HUMAN Ubiquitin-like modifier-activating enzyme 1 OS=Homo sapiens OX=9606 GN=UBA1 PE=1 SV=3	1	62	62	62	35	39	37	35	45	46	37	35	38	38	35	39	37	35	45	46	37	35	38	38	35	39	37	35	45	46
Q16222	UDP-N-acetylhexosamine pyrophosphorylase;UDP-N-acetylgalactosamine pyrophosphorylase;UDP-N-acetylglucosamine pyrophosphorylase	UAP1	0.92913	0.94845	0.83137	0.98117	0.98544	1.0125	1.1556	1.1406	0.3963	1.5791	Q16222	16	16	15	UDP-N-acetylhexosamine pyrophosphorylase;UDP-N-acetylgalactosamine pyrophosphorylase;UDP-N-acetylglucosamine pyrophosphorylase	UAP1	sp|Q16222|UAP1_HUMAN UDP-N-acetylhexosamine pyrophosphorylase OS=Homo sapiens OX=9606 GN=UAP1 PE=1 SV=3	1	16	16	15	10	10	7	9	2	2	10	8	6	7	10	10	7	9	2	2	10	8	6	7	9	9	6	8	2	2
Q9BZF9	Uveal autoantigen with coiled-coil domains and ankyrin repeats	UACA	1.0395	0.93717	1.1659	0.93031	0.98538	1.177	1.0526	1.1338	1.1614	NaN	Q9BZF9	11	11	11	Uveal autoantigen with coiled-coil domains and ankyrin repeats	UACA	sp|Q9BZF9|UACA_HUMAN Uveal autoantigen with coiled-coil domains and ankyrin repeats OS=Homo sapiens OX=9606 GN=UACA PE=1 SV=2	1	11	11	11	4	4	4	4	2	3	1	2	3	5	4	4	4	4	2	3	1	2	3	5	4	4	4	4	2	3
O15042	U2 snRNP-associated SURP motif-containing protein	U2SURP	0.98945	0.93016	0.92659	1.0005	0.97506	0.97485	0.91478	0.91891	1.0344	1.0464	O15042	41	41	41	U2 snRNP-associated SURP motif-containing protein	U2SURP	sp|O15042|SR140_HUMAN U2 snRNP-associated SURP motif-containing protein OS=Homo sapiens OX=9606 GN=U2SURP PE=1 SV=2	1	41	41	41	24	25	27	27	18	18	26	25	29	29	24	25	27	27	18	18	26	25	29	29	24	25	27	27	18	18
P26368	Splicing factor U2AF 65 kDa subunit	U2AF2	0.9806	1.0211	0.97392	0.95923	1.0088	0.9553	0.87135	0.85456	0.98287	0.97531	P26368	19	19	19	Splicing factor U2AF 65 kDa subunit	U2AF2	sp|P26368|U2AF2_HUMAN Splicing factor U2AF 65 kDa subunit OS=Homo sapiens OX=9606 GN=U2AF2 PE=1 SV=4	1	19	19	19	13	12	13	12	12	13	12	12	12	12	13	12	13	12	12	13	12	12	12	12	13	12	13	12	12	13
Q01081;P0DN76;M0R2N4	Splicing factor U2AF 35 kDa subunit	U2AF1	1.0193	1.0295	0.98524	1.0778	0.99813	0.96598	0.90729	0.91474	0.97203	1.0119	Q01081;P0DN76	14;14;5	14;14;5	8;8;0	Splicing factor U2AF 35 kDa subunit	U2AF1	sp|Q01081|U2AF1_HUMAN Splicing factor U2AF 35 kDa subunit OS=Homo sapiens OX=9606 GN=U2AF1 PE=1 SV=3;sp|P0DN76|U2AF5_HUMAN Splicing factor U2AF 35 kDa subunit-like protein OS=Homo sapiens OX=9606 GN=U2AF1L5 PE=1 SV=1	3	14	14	8	9	8	10	8	9	7	8	10	10	9	9	8	10	8	9	7	8	10	10	9	5	4	6	4	3	4
Q6IPR3	tRNA wybutosine-synthesizing protein 3 homolog	TYW3	1.482	0.84607	NaN	0.80609	NaN	NaN	0.83215	0.89544	NaN	NaN	Q6IPR3	1	1	1	tRNA wybutosine-synthesizing protein 3 homolog	TYW3	sp|Q6IPR3|TYW3_HUMAN tRNA wybutosine-synthesizing protein 3 homolog OS=Homo sapiens OX=9606 GN=TYW3 PE=2 SV=2	1	1	1	1	0	1	1	1	0	0	0	0	1	1	0	1	1	1	0	0	0	0	1	1	0	1	1	1	0	0
P04818	Thymidylate synthase	TYMS	0.9869	0.89944	0.99842	0.94292	0.95509	0.91432	0.74141	0.77785	1.7609	1.8232	P04818	17	17	17	Thymidylate synthase	TYMS	sp|P04818|TYSY_HUMAN Thymidylate synthase OS=Homo sapiens OX=9606 GN=TYMS PE=1 SV=3	1	17	17	17	10	10	12	11	7	9	12	11	11	12	10	10	12	11	7	9	12	11	11	12	10	10	12	11	7	9
P19971;A0A1W2PP80	Thymidine phosphorylase	TYMP	NaN	NaN	0.71587	NaN	NaN	NaN	1.4405	1.847	0.35201	0.33351	P19971	5;1	5;1	5;1	Thymidine phosphorylase	TYMP	sp|P19971|TYPH_HUMAN Thymidine phosphorylase OS=Homo sapiens OX=9606 GN=TYMP PE=1 SV=2	2	5	5	5	1	0	1	1	5	4	0	0	0	0	1	0	1	1	5	4	0	0	0	0	1	0	1	1	5	4
Q9NNW7	Thioredoxin reductase 2, mitochondrial	TXNRD2	1.3975	1.0724	1.0025	0.9714	1.0318	1.1445	1.3089	1.4136	0.74627	NaN	Q9NNW7	7	6	6	Thioredoxin reductase 2, mitochondrial	TXNRD2	sp|Q9NNW7|TRXR2_HUMAN Thioredoxin reductase 2, mitochondrial OS=Homo sapiens OX=9606 GN=TXNRD2 PE=1 SV=3	1	7	6	6	4	4	3	4	2	1	2	3	3	3	3	3	2	3	1	0	1	2	2	2	3	3	2	3	1	0
Q16881	Thioredoxin reductase 1, cytoplasmic	TXNRD1	1.0388	1.0628	0.96538	1.0073	1.0159	1.0276	0.78181	0.75662	0.66494	0.68584	Q16881	31	31	30	Thioredoxin reductase 1, cytoplasmic	TXNRD1	sp|Q16881|TRXR1_HUMAN Thioredoxin reductase 1, cytoplasmic OS=Homo sapiens OX=9606 GN=TXNRD1 PE=1 SV=3	1	31	31	30	20	19	21	20	18	20	20	20	21	21	20	19	21	20	18	20	20	20	21	21	19	18	20	19	17	19
Q9NX01	Thioredoxin-like protein 4B	TXNL4B	NaN	NaN	NaN	NaN	NaN	NaN	NaN	NaN	NaN	NaN	Q9NX01	1	1	1	Thioredoxin-like protein 4B	TXNL4B	sp|Q9NX01|TXN4B_HUMAN Thioredoxin-like protein 4B OS=Homo sapiens OX=9606 GN=TXNL4B PE=1 SV=1	1	1	1	1	0	0	0	0	0	0	0	1	0	0	0	0	0	0	0	0	0	1	0	0	0	0	0	0	0	0
P83876	Thioredoxin-like protein 4A	TXNL4A	1.0821	1.1823	1.0348	1.0784	0.96853	1.1453	1.214	0.91166	0.88504	0.63674	P83876	7	7	7	Thioredoxin-like protein 4A	TXNL4A	sp|P83876|TXN4A_HUMAN Thioredoxin-like protein 4A OS=Homo sapiens OX=9606 GN=TXNL4A PE=1 SV=1	1	7	7	7	4	5	3	3	1	1	5	4	4	4	4	5	3	3	1	1	5	4	4	4	4	5	3	3	1	1
O43396	Thioredoxin-like protein 1	TXNL1	0.96723	0.97222	0.9484	0.98722	0.92309	0.95488	0.9868	1.017	0.98336	0.96172	O43396	18	18	18	Thioredoxin-like protein 1	TXNL1	sp|O43396|TXNL1_HUMAN Thioredoxin-like protein 1 OS=Homo sapiens OX=9606 GN=TXNL1 PE=1 SV=3	1	18	18	18	11	13	13	14	13	12	14	13	12	12	11	13	13	14	13	12	14	13	12	12	11	13	13	14	13	12
O14530	Thioredoxin domain-containing protein 9	TXNDC9	0.98224	0.95756	0.9547	1.1135	1.07	1.043	1.0731	1.1353	1.2095	1.3562	O14530	4	4	4	Thioredoxin domain-containing protein 9	TXNDC9	sp|O14530|TXND9_HUMAN Thioredoxin domain-containing protein 9 OS=Homo sapiens OX=9606 GN=TXNDC9 PE=1 SV=2	1	4	4	4	4	3	3	2	1	1	1	1	3	1	4	3	3	2	1	1	1	1	3	1	4	3	3	2	1	1
Q8NBS9	Thioredoxin domain-containing protein 5	TXNDC5	1.0214	1.0101	1.0631	0.99358	1.0121	1.0265	1.211	1.2664	1.0892	1.0743	Q8NBS9	22	22	22	Thioredoxin domain-containing protein 5	TXNDC5	sp|Q8NBS9|TXND5_HUMAN Thioredoxin domain-containing protein 5 OS=Homo sapiens OX=9606 GN=TXNDC5 PE=1 SV=2	1	22	22	22	17	15	12	15	13	14	15	13	16	14	17	15	12	15	13	14	15	13	16	14	17	15	12	15	13	14
Q9BRA2	Thioredoxin domain-containing protein 17	TXNDC17	0.99109	1.0092	1.0504	1.0391	0.97128	0.97795	0.89621	0.93469	0.91953	0.97864	Q9BRA2	11	11	11	Thioredoxin domain-containing protein 17	TXNDC17	sp|Q9BRA2|TXD17_HUMAN Thioredoxin domain-containing protein 17 OS=Homo sapiens OX=9606 GN=TXNDC17 PE=1 SV=1	1	11	11	11	5	6	7	6	5	7	4	6	8	6	5	6	7	6	5	7	4	6	8	6	5	6	7	6	5	7
O95881	Thioredoxin domain-containing protein 12	TXNDC12	1.008	1.0096	1.0485	0.96214	0.97026	1.0116	1.0957	1.0909	0.88075	0.86093	O95881	10	10	10	Thioredoxin domain-containing protein 12	TXNDC12	sp|O95881|TXD12_HUMAN Thioredoxin domain-containing protein 12 OS=Homo sapiens OX=9606 GN=TXNDC12 PE=1 SV=1	1	10	10	10	9	8	9	9	6	7	8	9	8	8	9	8	9	9	6	7	8	9	8	8	9	8	9	9	6	7
Q99757	Thioredoxin, mitochondrial	TXN2	1.038	0.99853	1.0907	0.98305	0.95912	1.0281	0.56505	0.55641	1.0488	0.90232	Q99757	7	7	7	Thioredoxin, mitochondrial	TXN2	sp|Q99757|THIOM_HUMAN Thioredoxin, mitochondrial OS=Homo sapiens OX=9606 GN=TXN2 PE=1 SV=2	1	7	7	7	3	3	4	3	3	2	3	4	5	5	3	3	4	3	3	2	3	4	5	5	3	3	4	3	3	2
P10599	Thioredoxin	TXN	0.99034	0.99958	1.0786	0.97923	1.0428	1.0406	1.1245	1.1236	0.97486	1.0039	P10599	13	13	13	Thioredoxin	TXN	sp|P10599|THIO_HUMAN Thioredoxin OS=Homo sapiens OX=9606 GN=TXN PE=1 SV=3	1	13	13	13	9	9	9	9	9	10	9	9	9	9	9	9	9	9	9	10	9	9	9	9	9	9	9	9	9	10
Q9NUQ3;Q9BZA5	Gamma-taxilin	TXLNG	0.986	0.94144	0.94282	0.93641	0.9057	0.94333	0.85005	0.78303	1.0076	1.0377	Q9NUQ3	15;1	14;1	14;1	Gamma-taxilin	TXLNG	sp|Q9NUQ3|TXLNG_HUMAN Gamma-taxilin OS=Homo sapiens OX=9606 GN=TXLNG PE=1 SV=2	2	15	14	14	7	6	9	6	5	4	6	8	9	7	6	5	8	5	5	4	6	7	8	6	6	5	8	5	5	4
Q8N3L3	Beta-taxilin	TXLNB	NaN	NaN	NaN	NaN	NaN	NaN	NaN	NaN	NaN	NaN	Q8N3L3	2	1	1	Beta-taxilin	TXLNB	sp|Q8N3L3|TXLNB_HUMAN Beta-taxilin OS=Homo sapiens OX=9606 GN=TXLNB PE=1 SV=3	1	2	1	1	1	1	2	1	0	0	0	1	1	1	0	0	1	0	0	0	0	0	0	0	0	0	1	0	0	0
P40222	Alpha-taxilin	TXLNA	0.89232	1.0186	0.96983	0.76688	0.68897	0.9158	0.97906	0.90045	0.95325	0.93214	P40222	19	19	18	Alpha-taxilin	TXLNA	sp|P40222|TXLNA_HUMAN Alpha-taxilin OS=Homo sapiens OX=9606 GN=TXLNA PE=1 SV=3	1	19	19	18	7	8	10	9	8	7	8	9	11	8	7	8	10	9	8	7	8	9	11	8	6	7	9	8	8	7
Q3B726	DNA-directed RNA polymerase I subunit RPA43	TWISTNB	1.0024	1.093	1.0013	1.0636	0.81005	0.90024	0.84539	1.3545	NaN	1.1811	Q3B726	5	5	5	DNA-directed RNA polymerase I subunit RPA43	TWISTNB	sp|Q3B726|RPA43_HUMAN DNA-directed RNA polymerase I subunit RPA43 OS=Homo sapiens OX=9606 GN=TWISTNB PE=1 SV=1	1	5	5	5	4	2	2	3	0	1	2	1	4	1	4	2	2	3	0	1	2	1	4	1	4	2	2	3	0	1
Q6IBS0	Twinfilin-2	TWF2	1.0801	1.1248	1.1418	1.0908	1.0387	1.1441	1.132	1.1178	0.8946	0.86706	Q6IBS0	22	22	11	Twinfilin-2	TWF2	sp|Q6IBS0|TWF2_HUMAN Twinfilin-2 OS=Homo sapiens OX=9606 GN=TWF2 PE=1 SV=2	1	22	22	11	14	14	11	14	14	15	13	13	13	13	14	14	11	14	14	15	13	13	13	13	7	6	4	7	7	7
Q12792	Twinfilin-1	TWF1	1.04	1.0023	0.97329	0.99231	1.0078	0.99813	1.0892	1.0922	0.96847	0.85882	Q12792	16	13	13	Twinfilin-1	TWF1	sp|Q12792|TWF1_HUMAN Twinfilin-1 OS=Homo sapiens OX=9606 GN=TWF1 PE=1 SV=3	1	16	13	13	13	14	12	14	9	10	14	12	13	14	11	11	10	12	8	8	12	10	11	12	11	11	10	12	8	8
Q9NYZ1;Q96ET8	Golgi apparatus membrane protein TVP23 homolog B;Golgi apparatus membrane protein TVP23 homolog C	TVP23B;TVP23C	1.0109	1.4176	1.0432	1.1204	1.3216	NaN	1.2118	1.1638	NaN	NaN	Q9NYZ1;Q96ET8	2;1	2;1	2;1	Golgi apparatus membrane protein TVP23 homolog B;Golgi apparatus membrane protein TVP23 homolog C	TVP23B;TVP23C	sp|Q9NYZ1|TV23B_HUMAN Golgi apparatus membrane protein TVP23 homolog B OS=Homo sapiens OX=9606 GN=TVP23B PE=1 SV=2;sp|Q96ET8|TV23C_HUMAN Golgi apparatus membrane protein TVP23 homolog C OS=Homo sapiens OX=9606 GN=TVP23C PE=1 SV=3	2	2	2	2	2	1	1	1	1	1	2	0	2	2	2	1	1	1	1	1	2	0	2	2	2	1	1	1	1	1
Q9H6E5;H3BRB1	Speckle targeted PIP5K1A-regulated poly(A) polymerase	TUT1	0.34228	0.55811	0.68757	0.3554	0.53399	0.50758	0.76544	0.75068	NaN	NaN	Q9H6E5	3;1	3;1	3;1	Speckle targeted PIP5K1A-regulated poly(A) polymerase	TUT1	sp|Q9H6E5|STPAP_HUMAN Speckle targeted PIP5K1A-regulated poly(A) polymerase OS=Homo sapiens OX=9606 GN=TUT1 PE=1 SV=2	2	3	3	3	1	1	2	1	0	0	2	2	1	2	1	1	2	1	0	0	2	2	1	2	1	1	2	1	0	0
P49411	Elongation factor Tu, mitochondrial	TUFM	1.0189	1.0921	1.0104	1.0412	1.0511	1.0479	0.96717	0.95099	0.95581	0.97369	P49411	40	40	40	Elongation factor Tu, mitochondrial	TUFM	sp|P49411|EFTU_HUMAN Elongation factor Tu, mitochondrial OS=Homo sapiens OX=9606 GN=TUFM PE=1 SV=2	1	40	40	40	28	27	28	29	30	30	28	28	30	29	28	27	28	29	30	30	28	28	30	29	28	27	28	29	30	30
Q9UGJ1	Gamma-tubulin complex component 4	TUBGCP4	0.87283	1.0186	NaN	NaN	NaN	0.8878	1.6259	NaN	1.3958	1.211	Q9UGJ1	4	4	4	Gamma-tubulin complex component 4	TUBGCP4	sp|Q9UGJ1|GCP4_HUMAN Gamma-tubulin complex component 4 OS=Homo sapiens OX=9606 GN=TUBGCP4 PE=1 SV=1	1	4	4	4	0	0	1	0	1	1	0	1	1	1	0	0	1	0	1	1	0	1	1	1	0	0	1	0	1	1
Q96CW5	Gamma-tubulin complex component 3	TUBGCP3	1.1534	1.0808	0.88032	1.0578	0.90428	0.92035	0.8981	0.89286	NaN	1.1193	Q96CW5	11	11	11	Gamma-tubulin complex component 3	TUBGCP3	sp|Q96CW5|GCP3_HUMAN Gamma-tubulin complex component 3 OS=Homo sapiens OX=9606 GN=TUBGCP3 PE=1 SV=2	1	11	11	11	3	2	2	2	1	2	2	1	5	4	3	2	2	2	1	2	2	1	5	4	3	2	2	2	1	2
Q9BSJ2	Gamma-tubulin complex component 2	TUBGCP2	1.0157	1.2495	0.94	1.4118	NaN	1.188	1.2553	0.85307	0.77631	0.88767	Q9BSJ2	9	9	9	Gamma-tubulin complex component 2	TUBGCP2	sp|Q9BSJ2|GCP2_HUMAN Gamma-tubulin complex component 2 OS=Homo sapiens OX=9606 GN=TUBGCP2 PE=1 SV=2	1	9	9	9	3	2	3	4	1	4	0	2	3	2	3	2	3	4	1	4	0	2	3	2	3	2	3	4	1	4
P23258;Q9NRH3	Tubulin gamma-1 chain;Tubulin gamma-2 chain	TUBG1;TUBG2	0.96506	0.93275	1.0054	1.0324	0.91527	0.92148	0.96456	0.94213	1.0072	1.0454	P23258;Q9NRH3	19;15	19;15	19;15	Tubulin gamma-1 chain;Tubulin gamma-2 chain	TUBG1;TUBG2	sp|P23258|TBG1_HUMAN Tubulin gamma-1 chain OS=Homo sapiens OX=9606 GN=TUBG1 PE=1 SV=2;sp|Q9NRH3|TBG2_HUMAN Tubulin gamma-2 chain OS=Homo sapiens OX=9606 GN=TUBG2 PE=2 SV=1	2	19	19	19	14	13	15	15	8	10	14	15	16	14	14	13	15	15	8	10	14	15	16	14	14	13	15	15	8	10
Q3ZCM7	Tubulin beta-8 chain	TUBB8	0.98964	0.99755	0.98853	1.0045	1.0029	1.0569	0.91656	0.90916	0.95056	0.90129	Q3ZCM7	12	2	2	Tubulin beta-8 chain	TUBB8	sp|Q3ZCM7|TBB8_HUMAN Tubulin beta-8 chain OS=Homo sapiens OX=9606 GN=TUBB8 PE=1 SV=2	1	12	2	2	10	10	10	11	11	11	10	10	10	10	2	2	2	2	2	2	2	2	2	2	2	2	2	2	2	2
Q9BUF5	Tubulin beta-6 chain	TUBB6	0.97953	1.0409	0.98969	1.0294	1.017	1.0019	1.1325	1.1679	0.72678	0.71293	Q9BUF5	29	14	14	Tubulin beta-6 chain	TUBB6	sp|Q9BUF5|TBB6_HUMAN Tubulin beta-6 chain OS=Homo sapiens OX=9606 GN=TUBB6 PE=1 SV=1	1	29	14	14	23	21	24	21	22	22	21	20	24	22	12	10	11	10	8	9	9	10	12	10	12	10	11	10	8	9
P68371	Tubulin beta-4B chain	TUBB4B	0.98486	0.97844	0.96418	0.99613	0.98536	0.98647	0.89178	0.91147	0.87595	0.89196	P68371	35	35	2	Tubulin beta-4B chain	TUBB4B	sp|P68371|TBB4B_HUMAN Tubulin beta-4B chain OS=Homo sapiens OX=9606 GN=TUBB4B PE=1 SV=1	1	35	35	2	25	25	25	26	31	33	25	25	25	25	25	25	25	26	31	33	25	25	25	25	1	1	1	1	1	2
P04350	Tubulin beta-4A chain	TUBB4A	1.0113	0.96574	0.96453	1.0206	1.2381	1.0219	0.84236	0.88634	1.03	0.98172	P04350	31	8	5	Tubulin beta-4A chain	TUBB4A	sp|P04350|TBB4A_HUMAN Tubulin beta-4A chain OS=Homo sapiens OX=9606 GN=TUBB4A PE=1 SV=2	1	31	8	5	20	21	22	21	27	27	22	21	22	22	2	3	4	3	6	5	4	3	4	4	2	3	2	3	4	3
Q13509	Tubulin beta-3 chain	TUBB3	0.99611	1.0067	1.0413	1.0345	1.0801	1.0078	1.4211	1.3365	1.2216	1.2248	Q13509	31	15	1	Tubulin beta-3 chain	TUBB3	sp|Q13509|TBB3_HUMAN Tubulin beta-3 chain OS=Homo sapiens OX=9606 GN=TUBB3 PE=1 SV=2	1	31	15	1	22	23	20	22	27	27	22	21	21	21	11	12	9	10	12	12	11	10	10	10	1	1	1	1	1	1
A0A0B4J269;Q01726		TUBB3	NaN	NaN	NaN	NaN	0.96615	NaN	NaN	NaN	NaN	NaN	A0A0B4J269	31;1	1;1	1;1		TUBB3	tr|A0A0B4J269|A0A0B4J269_HUMAN Uncharacterized protein OS=Homo sapiens OX=9606 PE=1 SV=1	2	31	1	1	21	22	19	21	26	26	22	20	20	20	0	0	0	0	0	0	1	0	0	0	0	0	0	0	0	0
Q13885	Tubulin beta-2A chain	TUBB2A	0.97748	1.0391	0.9978	1.0334	1.1473	0.96429	0.9784	0.96664	0.85128	0.83652	Q13885	33	9	2	Tubulin beta-2A chain	TUBB2A	sp|Q13885|TBB2A_HUMAN Tubulin beta-2A chain OS=Homo sapiens OX=9606 GN=TUBB2A PE=1 SV=1	1	33	9	2	23	24	24	24	27	28	24	24	25	24	5	6	6	5	6	6	6	6	7	6	1	1	1	1	1	2
P07437;A6NNZ2	Tubulin beta chain	TUBB	0.93739	0.91597	0.95478	0.9752	0.97085	0.97776	0.8916	0.83772	0.95567	0.95567	P07437	34;9	8;0	7;0	Tubulin beta chain	TUBB	sp|P07437|TBB5_HUMAN Tubulin beta chain OS=Homo sapiens OX=9606 GN=TUBB PE=1 SV=2	2	34	8	7	24	24	24	25	31	32	24	24	24	24	6	6	6	6	8	8	6	6	6	6	5	5	5	5	7	7
A6NHL2	Tubulin alpha chain-like 3	TUBAL3	1.2504	1.141	0.86197	1.0576	1.0798	1.0778	NaN	1.0781	NaN	NaN	A6NHL2	7	1	1	Tubulin alpha chain-like 3	TUBAL3	sp|A6NHL2|TBAL3_HUMAN Tubulin alpha chain-like 3 OS=Homo sapiens OX=9606 GN=TUBAL3 PE=1 SV=2	1	7	1	1	6	6	4	4	5	6	5	5	5	6	1	1	0	1	0	0	1	1	1	1	1	1	0	1	0	0
Q9NY65	Tubulin alpha-8 chain	TUBA8	0.74965	NaN	NaN	NaN	0.95001	NaN	NaN	NaN	NaN	NaN	Q9NY65	21	1	1	Tubulin alpha-8 chain	TUBA8	sp|Q9NY65|TBA8_HUMAN Tubulin alpha-8 chain OS=Homo sapiens OX=9606 GN=TUBA8 PE=1 SV=1	1	21	1	1	13	13	13	11	19	19	13	12	14	13	0	0	0	0	0	0	1	0	1	0	0	0	0	0	0	0
P68366	Tubulin alpha-4A chain	TUBA4A	0.90321	0.98361	0.98795	1.043	1.0044	1.084	1.95	1.9437	0.56224	0.53101	P68366	35	6	6	Tubulin alpha-4A chain	TUBA4A	sp|P68366|TBA4A_HUMAN Tubulin alpha-4A chain OS=Homo sapiens OX=9606 GN=TUBA4A PE=1 SV=1	1	35	6	6	25	25	25	23	30	31	22	22	23	23	5	4	5	5	4	4	3	3	3	4	5	4	5	5	4	4
Q9BQE3	Tubulin alpha-1C chain	TUBA1C	1.0466	1.0069	1.0247	0.98836	1.1409	1.2068	0.89017	0.87455	0.84377	0.86229	Q9BQE3	44	6	4	Tubulin alpha-1C chain	TUBA1C	sp|Q9BQE3|TBA1C_HUMAN Tubulin alpha-1C chain OS=Homo sapiens OX=9606 GN=TUBA1C PE=1 SV=1	1	44	6	4	27	27	27	24	38	39	24	24	28	26	5	5	5	4	4	4	3	3	5	5	4	4	4	3	2	2
P68363;Q9H853	Tubulin alpha-1B chain	TUBA1B	1.0045	1.0192	0.98689	1.0194	1.0137	1.0603	0.89869	0.88717	0.94584	0.93094	P68363	44;2	44;2	0;0	Tubulin alpha-1B chain	TUBA1B	sp|P68363|TBA1B_HUMAN Tubulin alpha-1B chain OS=Homo sapiens OX=9606 GN=TUBA1B PE=1 SV=1	2	44	44	0	27	27	26	24	40	41	25	25	27	26	27	27	26	24	40	41	25	25	27	26	0	0	0	0	0	0
Q71U36;P0DPH8;P0DPH7;Q6PEY2	Tubulin alpha-1A chain	TUBA1A	1.0906	1.0042	0.91826	NaN	0.94422	1.0669	1.2832	0.82104	NaN	NaN	Q71U36;P0DPH8;P0DPH7	43;29;29;20	1;1;1;1	1;1;1;1	Tubulin alpha-1A chain	TUBA1A	sp|Q71U36|TBA1A_HUMAN Tubulin alpha-1A chain OS=Homo sapiens OX=9606 GN=TUBA1A PE=1 SV=1;sp|P0DPH8|TBA3D_HUMAN Tubulin alpha-3D chain OS=Homo sapiens OX=9606 GN=TUBA3D PE=1 SV=1;sp|P0DPH7|TBA3C_HUMAN Tubulin alpha-3C chain OS=Homo sapiens OX=9606 GN=TUBA3C	4	43	1	1	27	25	26	24	38	39	25	25	27	26	1	0	1	1	0	0	1	1	1	1	1	0	1	1	0	0
Q8WZ42	Titin	TTN	1.0491	1.0883	1.0901	1.1508	1.0707	1.126	1.0288	0.93093	1.8634	1.0023	Q8WZ42	17	17	17	Titin	TTN	sp|Q8WZ42|TITIN_HUMAN Titin OS=Homo sapiens OX=9606 GN=TTN PE=1 SV=4	1	17	17	17	5	3	5	4	3	5	4	3	4	5	5	3	5	4	3	5	4	3	4	5	5	3	5	4	3	5
Q14166	Tubulin--tyrosine ligase-like protein 12	TTLL12	0.9834	1.0941	0.99157	0.98383	1.0496	1.1077	1.0984	1.0055	0.98569	0.91992	Q14166	30	30	30	Tubulin--tyrosine ligase-like protein 12	TTLL12	sp|Q14166|TTL12_HUMAN Tubulin--tyrosine ligase-like protein 12 OS=Homo sapiens OX=9606 GN=TTLL12 PE=1 SV=2	1	30	30	30	21	22	23	20	19	15	19	21	21	22	21	22	23	20	19	15	19	21	21	22	21	22	23	20	19	15
Q8NG68	Tubulin--tyrosine ligase	TTL	NaN	0.61211	0.77807	0.67012	0.62587	0.60254	0.63515	0.59969	NaN	NaN	Q8NG68	1	1	1	Tubulin--tyrosine ligase	TTL	sp|Q8NG68|TTL_HUMAN Tubulin--tyrosine ligase OS=Homo sapiens OX=9606 GN=TTL PE=1 SV=2	1	1	1	1	1	1	1	1	0	0	1	1	0	1	1	1	1	1	0	0	1	1	0	1	1	1	1	1	0	0
Q6NXR4	TELO2-interacting protein 2	TTI2	1.1655	1.1564	0.77335	0.8471	0.71303	1.6928	1.1655	1.0006	0.98995	0.90971	Q6NXR4	10	10	10	TELO2-interacting protein 2	TTI2	sp|Q6NXR4|TTI2_HUMAN TELO2-interacting protein 2 OS=Homo sapiens OX=9606 GN=TTI2 PE=1 SV=1	1	10	10	10	2	3	2	2	5	2	4	4	1	2	2	3	2	2	5	2	4	4	1	2	2	3	2	2	5	2
O43156	TELO2-interacting protein 1 homolog	TTI1	0.78817	0.66241	0.84961	0.76345	0.85651	0.80547	0.69135	0.72711	1.234	1.2039	O43156	12	12	12	TELO2-interacting protein 1 homolog	TTI1	sp|O43156|TTI1_HUMAN TELO2-interacting protein 1 homolog OS=Homo sapiens OX=9606 GN=TTI1 PE=1 SV=3	1	12	12	12	1	3	2	4	5	4	4	3	5	3	1	3	2	4	5	4	4	3	5	3	1	3	2	4	5	4
Q9UNY4	Transcription termination factor 2	TTF2	0.99411	0.97202	0.91453	0.96147	0.77766	1.0528	1.041	0.93836	NaN	NaN	Q9UNY4	7	7	7	Transcription termination factor 2	TTF2	sp|Q9UNY4|TTF2_HUMAN Transcription termination factor 2 OS=Homo sapiens OX=9606 GN=TTF2 PE=1 SV=2	1	7	7	7	3	3	3	4	0	0	3	5	3	3	3	3	3	4	0	0	3	5	3	3	3	3	3	4	0	0
Q15361	Transcription termination factor 1	TTF1	NaN	1.0317	0.97597	NaN	NaN	NaN	NaN	NaN	NaN	NaN	Q15361	3	3	3	Transcription termination factor 1	TTF1	sp|Q15361|TTF1_HUMAN Transcription termination factor 1 OS=Homo sapiens OX=9606 GN=TTF1 PE=1 SV=3	1	3	3	3	1	0	0	0	0	1	2	0	0	1	1	0	0	0	0	1	2	0	0	1	1	0	0	0	0	1
Q8N5M4	Tetratricopeptide repeat protein 9C	TTC9C	NaN	NaN	1.0566	1.2173	NaN	NaN	NaN	0.68957	NaN	1.8926	Q8N5M4	3	3	3	Tetratricopeptide repeat protein 9C	TTC9C	sp|Q8N5M4|TTC9C_HUMAN Tetratricopeptide repeat protein 9C OS=Homo sapiens OX=9606 GN=TTC9C PE=1 SV=1	1	3	3	3	1	1	0	1	1	2	0	0	0	0	1	1	0	1	1	2	0	0	0	0	1	1	0	1	1	2
Q8N0Z6	Tetratricopeptide repeat protein 5	TTC5	1.1701	NaN	NaN	0.85581	0.86736	0.97074	0.68423	0.5093	NaN	NaN	Q8N0Z6	5	5	5	Tetratricopeptide repeat protein 5	TTC5	sp|Q8N0Z6|TTC5_HUMAN Tetratricopeptide repeat protein 5 OS=Homo sapiens OX=9606 GN=TTC5 PE=1 SV=2	1	5	5	5	1	1	2	2	0	2	1	1	2	0	1	1	2	2	0	2	1	1	2	0	1	1	2	2	0	2
O95801	Tetratricopeptide repeat protein 4	TTC4	0.97888	1.0394	0.98449	1.0347	1.0604	0.9434	0.90763	0.87143	1.0585	1.0861	O95801	17	17	17	Tetratricopeptide repeat protein 4	TTC4	sp|O95801|TTC4_HUMAN Tetratricopeptide repeat protein 4 OS=Homo sapiens OX=9606 GN=TTC4 PE=1 SV=3	1	17	17	17	11	13	12	11	5	6	10	10	14	12	11	13	12	11	5	6	10	10	14	12	11	13	12	11	5	6
Q5R3I4	Tetratricopeptide repeat protein 38	TTC38	0.63416	0.49564	0.95476	NaN	0.86297	0.91995	0.82458	0.98554	1.0071	1.0394	Q5R3I4	3	3	3	Tetratricopeptide repeat protein 38	TTC38	sp|Q5R3I4|TTC38_HUMAN Tetratricopeptide repeat protein 38 OS=Homo sapiens OX=9606 GN=TTC38 PE=1 SV=1	1	3	3	3	2	0	1	2	1	1	1	1	1	1	2	0	1	2	1	1	1	1	1	1	2	0	1	2	1	1
Q6PGP7	Tetratricopeptide repeat protein 37	TTC37	NaN	0.97182	0.83185	0.98053	0.94788	0.98779	1.8833	1.5981	NaN	1.6437	Q6PGP7	5	5	5	Tetratricopeptide repeat protein 37	TTC37	sp|Q6PGP7|TTC37_HUMAN Tetratricopeptide repeat protein 37 OS=Homo sapiens OX=9606 GN=TTC37 PE=1 SV=1	1	5	5	5	2	1	1	2	0	2	2	3	0	1	2	1	1	2	0	2	2	3	0	1	2	1	1	2	0	2
A8MYJ7	Tetratricopeptide repeat protein 34	TTC34	NaN	0.99314	NaN	NaN	NaN	NaN	NaN	NaN	NaN	NaN	A8MYJ7	1	1	1	Tetratricopeptide repeat protein 34	TTC34	sp|A8MYJ7|TTC34_HUMAN Tetratricopeptide repeat protein 34 OS=Homo sapiens OX=9606 GN=TTC34 PE=2 SV=2	1	1	1	1	0	0	0	0	0	0	0	0	0	1	0	0	0	0	0	0	0	0	0	1	0	0	0	0	0	0
Q6P3X3	Tetratricopeptide repeat protein 27	TTC27	1.014	1.1395	1.0356	1.0442	1.3219	1.014	1.0735	0.76669	1.0988	1.0903	Q6P3X3	12	12	12	Tetratricopeptide repeat protein 27	TTC27	sp|Q6P3X3|TTC27_HUMAN Tetratricopeptide repeat protein 27 OS=Homo sapiens OX=9606 GN=TTC27 PE=1 SV=1	1	12	12	12	6	6	7	8	3	3	6	7	11	8	6	6	7	8	3	3	6	7	11	8	6	6	7	8	3	3
Q6DKK2	Tetratricopeptide repeat protein 19, mitochondrial	TTC19	NaN	NaN	0.97718	NaN	1.2127	1.1642	0.90198	NaN	1.2146	1.5351	Q6DKK2	7	7	7	Tetratricopeptide repeat protein 19, mitochondrial	TTC19	sp|Q6DKK2|TTC19_HUMAN Tetratricopeptide repeat protein 19, mitochondrial OS=Homo sapiens OX=9606 GN=TTC19 PE=1 SV=4	1	7	7	7	1	0	1	0	2	3	3	2	0	0	1	0	1	0	2	3	3	2	0	0	1	0	1	0	2	3
Q99614	Tetratricopeptide repeat protein 1	TTC1	0.94552	0.96945	0.99498	1.0062	0.92467	0.91131	0.94929	1.0132	0.99192	0.98514	Q99614	15	15	15	Tetratricopeptide repeat protein 1	TTC1	sp|Q99614|TTC1_HUMAN Tetratricopeptide repeat protein 1 OS=Homo sapiens OX=9606 GN=TTC1 PE=1 SV=1	1	15	15	15	11	10	12	10	4	3	9	11	10	12	11	10	12	10	4	3	9	11	10	12	11	10	12	10	4	3
Q8NFU3	Thiosulfate sulfurtransferase/rhodanese-like domain-containing protein 1	TSTD1	1.0482	1.0437	1.0826	1.0009	1.0531	1.0265	1.1885	1.2619	0.95131	0.81668	Q8NFU3	5	5	5	Thiosulfate sulfurtransferase/rhodanese-like domain-containing protein 1	TSTD1	sp|Q8NFU3|TSTD1_HUMAN Thiosulfate:glutathione sulfurtransferase OS=Homo sapiens OX=9606 GN=TSTD1 PE=1 SV=3	1	5	5	5	5	5	5	5	2	2	5	5	5	5	5	5	5	5	2	2	5	5	5	5	5	5	5	5	2	2
Q13630	GDP-L-fucose synthase	TSTA3	1.0205	1.0585	0.99904	1.1148	1.1396	1.0633	0.98212	0.97326	0.94836	1.0477	Q13630	13	13	13	GDP-L-fucose synthase	TSTA3	sp|Q13630|FCL_HUMAN GDP-L-fucose synthase OS=Homo sapiens OX=9606 GN=TSTA3 PE=1 SV=1	1	13	13	13	8	8	8	8	7	10	7	9	8	7	8	8	8	8	7	10	7	9	8	7	8	8	8	8	7	10
Q16762	Thiosulfate sulfurtransferase	TST	2.5012	1.0373	1.3851	1.0179	1.173	1.1386	1.9804	2.1864	1.2594	1.0636	Q16762	9	9	9	Thiosulfate sulfurtransferase	TST	sp|Q16762|THTR_HUMAN Thiosulfate sulfurtransferase OS=Homo sapiens OX=9606 GN=TST PE=1 SV=4	1	9	9	9	5	7	6	5	5	6	5	7	2	3	5	7	6	5	5	6	5	7	2	3	5	7	6	5	5	6
Q9Y5U2	Protein TSSC4	TSSC4	1.0183	0.88282	1.0224	0.9295	1.03	0.83775	0.95316	1.3946	1.1346	1.0831	Q9Y5U2	7	7	7	Protein TSSC4	TSSC4	sp|Q9Y5U2|TSSC4_HUMAN Protein TSSC4 OS=Homo sapiens OX=9606 GN=TSSC4 PE=1 SV=3	1	7	7	7	4	4	3	2	2	4	4	4	4	3	4	4	3	2	2	4	4	4	4	3	4	4	3	2	2	4
Q53HC9	Protein TSSC1	TSSC1	0.92375	NaN	0.90992	0.93151	0.82929	1.0163	0.92829	0.99886	1.3705	0.70693	Q53HC9	5	5	5	Protein TSSC1	TSSC1	sp|Q53HC9|EIPR1_HUMAN EARP and GARP complex-interacting protein 1 OS=Homo sapiens OX=9606 GN=EIPR1 PE=1 SV=2	1	5	5	5	1	1	3	1	1	3	1	1	1	0	1	1	3	1	1	3	1	1	1	0	1	1	3	1	1	3
Q9UJK0	Ribosome biogenesis protein TSR3 homolog	TSR3	0.80218	0.85772	0.75334	0.76477	0.71148	0.70558	0.79706	0.81567	NaN	NaN	Q9UJK0	4	4	4	Ribosome biogenesis protein TSR3 homolog	TSR3	sp|Q9UJK0|TSR3_HUMAN Ribosome biogenesis protein TSR3 homolog OS=Homo sapiens OX=9606 GN=TSR3 PE=1 SV=1	1	4	4	4	4	3	3	2	0	0	2	1	4	3	4	3	3	2	0	0	2	1	4	3	4	3	3	2	0	0
Q2NL82	Pre-rRNA-processing protein TSR1 homolog	TSR1	1.0097	0.99964	0.96122	1.0041	1.1159	1.0104	0.83959	0.75937	1.0378	1.1095	Q2NL82	32	32	32	Pre-rRNA-processing protein TSR1 homolog	TSR1	sp|Q2NL82|TSR1_HUMAN Pre-rRNA-processing protein TSR1 homolog OS=Homo sapiens OX=9606 GN=TSR1 PE=1 SV=1	1	32	32	32	20	16	20	18	11	11	18	20	22	22	20	16	20	18	11	11	18	20	22	22	20	16	20	18	11	11
Q9H0U9	Testis-specific Y-encoded-like protein 1	TSPYL1	0.48163	1.5584	1.0536	1.6188	0.41793	NaN	NaN	0.75703	1.2659	1.088	Q9H0U9	4	4	4	Testis-specific Y-encoded-like protein 1	TSPYL1	sp|Q9H0U9|TSYL1_HUMAN Testis-specific Y-encoded-like protein 1 OS=Homo sapiens OX=9606 GN=TSPYL1 PE=1 SV=3	1	4	4	4	1	1	1	1	2	3	1	0	1	1	1	1	1	1	2	3	1	0	1	1	1	1	1	1	2	3
P30536	Translocator protein	TSPO	1.4707	0.99725	1.5054	NaN	1.3637	1.5554	3.2942	NaN	NaN	NaN	P30536	3	3	3	Translocator protein	TSPO	sp|P30536|TSPO_HUMAN Translocator protein OS=Homo sapiens OX=9606 GN=TSPO PE=1 SV=3	1	3	3	3	2	0	1	0	0	0	3	2	3	1	2	0	1	0	0	0	3	2	3	1	2	0	1	0	0	0
O43657	Tetraspanin-6	TSPAN6	1.3015	0.97576	1.2718	0.91022	1.0627	1.0724	1.1802	1.1192	NaN	NaN	O43657	4	4	4	Tetraspanin-6	TSPAN6	sp|O43657|TSN6_HUMAN Tetraspanin-6 OS=Homo sapiens OX=9606 GN=TSPAN6 PE=1 SV=1	1	4	4	4	2	2	2	3	1	0	2	3	2	2	2	2	2	3	1	0	2	3	2	2	2	2	2	3	1	0
Q8NG11	Tetraspanin-14	TSPAN14	1.3806	1.2201	1.1529	1.4181	1.0264	1.3109	1.1187	1.038	0.93775	0.83678	Q8NG11	6	6	6	Tetraspanin-14	TSPAN14	sp|Q8NG11|TSN14_HUMAN Tetraspanin-14 OS=Homo sapiens OX=9606 GN=TSPAN14 PE=1 SV=1	1	6	6	6	4	3	1	1	2	3	1	1	1	1	4	3	1	1	2	3	1	1	1	1	4	3	1	1	2	3
O95857	Tetraspanin-13	TSPAN13	NaN	1.4838	1.5488	1.4838	3.4856	1.1288	NaN	1.6264	1.9419	NaN	O95857	3	3	3	Tetraspanin-13	TSPAN13	sp|O95857|TSN13_HUMAN Tetraspanin-13 OS=Homo sapiens OX=9606 GN=TSPAN13 PE=2 SV=1	1	3	3	3	1	1	0	1	1	1	2	1	0	1	1	1	0	1	1	1	2	1	0	1	1	1	0	1	1	1
Q99598;C4P0D8	Translin-associated protein X	TSNAX;DISC1	0.9703	1.0104	0.98607	1.0441	1.0038	0.96971	1.0493	1.0582	1.0136	1.028	Q99598;C4P0D8	16;9	16;9	16;9	Translin-associated protein X	TSNAX;DISC1	sp|Q99598|TSNAX_HUMAN Translin-associated protein X OS=Homo sapiens OX=9606 GN=TSNAX PE=1 SV=1;tr|C4P0D8|C4P0D8_HUMAN Disrupted in schizophrenia 1 isoform 51 OS=Homo sapiens OX=9606 GN=TSNAX-DISC1 PE=2 SV=1	2	16	16	16	6	9	9	8	10	8	7	10	7	9	6	9	9	8	10	8	7	10	7	9	6	9	9	8	10	8
Q15631	Translin	TSN	1.0244	0.97624	1.0225	1.0364	1.0334	1.0779	1.0173	0.94043	0.93358	0.9582	Q15631	17	17	17	Translin	TSN	sp|Q15631|TSN_HUMAN Translin OS=Homo sapiens OX=9606 GN=TSN PE=1 SV=1	1	17	17	17	13	12	11	12	8	9	11	11	12	13	13	12	11	12	8	9	11	11	12	13	13	12	11	12	8	9
Q99816	Tumor susceptibility gene 101 protein	TSG101	1.0051	1.0557	1.0365	1.1217	1.106	1.1736	0.97182	1.1458	0.77054	0.79153	Q99816	17	17	17	Tumor susceptibility gene 101 protein	TSG101	sp|Q99816|TS101_HUMAN Tumor susceptibility gene 101 protein OS=Homo sapiens OX=9606 GN=TSG101 PE=1 SV=2	1	17	17	17	9	8	10	8	6	7	8	10	10	9	9	8	10	8	6	7	8	10	10	9	9	8	10	8	6	7
P43897	Elongation factor Ts, mitochondrial	TSFM	1.0352	1.0155	0.96929	0.99358	1.0344	1.0553	1.2075	1.1526	0.89567	0.81878	P43897	13	13	13	Elongation factor Ts, mitochondrial	TSFM	sp|P43897|EFTS_HUMAN Elongation factor Ts, mitochondrial OS=Homo sapiens OX=9606 GN=TSFM PE=1 SV=2	1	13	13	13	9	10	9	9	4	6	9	10	8	6	9	10	9	9	4	6	9	10	8	6	9	10	9	9	4	6
Q7Z6J9	tRNA-splicing endonuclease subunit Sen54	TSEN54	1.259	0.8834	NaN	NaN	0.98214	NaN	0.73642	NaN	0.79769	0.65536	Q7Z6J9	7	7	7	tRNA-splicing endonuclease subunit Sen54	TSEN54	sp|Q7Z6J9|SEN54_HUMAN tRNA-splicing endonuclease subunit Sen54 OS=Homo sapiens OX=9606 GN=TSEN54 PE=1 SV=3	1	7	7	7	0	0	1	1	3	3	3	0	5	3	0	0	1	1	3	3	3	0	5	3	0	0	1	1	3	3
Q9BSV6	tRNA-splicing endonuclease subunit Sen34	TSEN34	1.0127	1.1328	NaN	0.8714	0.79643	1.0028	1.0411	0.96311	1.2814	NaN	Q9BSV6	10	10	10	tRNA-splicing endonuclease subunit Sen34	TSEN34	sp|Q9BSV6|SEN34_HUMAN tRNA-splicing endonuclease subunit Sen34 OS=Homo sapiens OX=9606 GN=TSEN34 PE=1 SV=1	1	10	10	10	0	2	4	4	3	0	5	4	5	2	0	2	4	4	3	0	5	4	5	2	0	2	4	4	3	0
Q8NCE0	tRNA-splicing endonuclease subunit Sen2	TSEN2	0.98054	0.74453	NaN	0.83535	NaN	NaN	0.55703	0.59288	NaN	NaN	Q8NCE0	3	3	3	tRNA-splicing endonuclease subunit Sen2	TSEN2	sp|Q8NCE0|SEN2_HUMAN tRNA-splicing endonuclease subunit Sen2 OS=Homo sapiens OX=9606 GN=TSEN2 PE=1 SV=2	1	3	3	3	0	1	2	1	0	0	0	0	2	3	0	1	2	1	0	0	0	0	2	3	0	1	2	1	0	0
Q8WW01	tRNA-splicing endonuclease subunit Sen15	TSEN15	0.90741	0.95122	0.83736	0.94238	0.96235	1.0194	0.8715	0.7407	1.5151	NaN	Q8WW01	4	4	4	tRNA-splicing endonuclease subunit Sen15	TSEN15	sp|Q8WW01|SEN15_HUMAN tRNA-splicing endonuclease subunit Sen15 OS=Homo sapiens OX=9606 GN=TSEN15 PE=1 SV=1	1	4	4	4	1	1	1	1	1	0	2	2	2	1	1	1	1	1	1	0	2	2	2	1	1	1	1	1	1	0
O75157	TSC22 domain family protein 2	TSC22D2	0.96527	1.0592	0.98657	0.93026	0.9944	1.0325	0.84658	0.81774	NaN	NaN	O75157	6	6	3	TSC22 domain family protein 2	TSC22D2	sp|O75157|T22D2_HUMAN TSC22 domain family protein 2 OS=Homo sapiens OX=9606 GN=TSC22D2 PE=1 SV=3	1	6	6	3	4	2	2	3	1	0	2	3	4	3	4	2	2	3	1	0	2	3	4	3	1	0	0	0	1	0
Q15714	TSC22 domain family protein 1	TSC22D1	1.0258	1.0212	1.0587	0.89698	0.94735	1.0982	0.77584	0.85341	NaN	NaN	Q15714	5	2	2	TSC22 domain family protein 1	TSC22D1	sp|Q15714|T22D1_HUMAN TSC22 domain family protein 1 OS=Homo sapiens OX=9606 GN=TSC22D1 PE=1 SV=3	1	5	2	2	5	3	3	5	0	0	3	4	5	4	2	1	1	2	0	0	1	1	2	1	2	1	1	2	0	0
Q8WWH5	Probable tRNA pseudouridine synthase 1	TRUB1	1.14	0.96828	1.0586	1.0484	1.0233	1.0155	1.138	0.96054	1.1495	1.106	Q8WWH5	10	10	10	Probable tRNA pseudouridine synthase 1	TRUB1	sp|Q8WWH5|TRUB1_HUMAN Probable tRNA pseudouridine synthase 1 OS=Homo sapiens OX=9606 GN=TRUB1 PE=1 SV=1	1	10	10	10	6	6	4	7	5	5	6	6	6	5	6	6	4	7	5	5	6	6	6	5	6	6	4	7	5	5
Q9Y4A5	Transformation/transcription domain-associated protein	TRRAP	0.94886	1.0483	0.97775	1.4576	1.0427	0.88286	0.92538	1.0568	NaN	1.1496	Q9Y4A5	24	23	23	Transformation/transcription domain-associated protein	TRRAP	sp|Q9Y4A5|TRRAP_HUMAN Transformation/transcription domain-associated protein OS=Homo sapiens OX=9606 GN=TRRAP PE=1 SV=3	1	24	23	23	6	7	7	5	5	5	6	7	12	7	5	6	7	4	5	5	6	6	11	6	5	6	7	4	5	5
A0A0B4J2A0;Q9UHJ6	Sedoheptulokinase	TRPV1;SHPK	0.88488	0.84157	0.967	0.94697	0.96484	1.0179	1.1659	1.2829	0.89753	0.88353	A0A0B4J2A0;Q9UHJ6	13;12	13;12	13;12	Sedoheptulokinase	TRPV1;SHPK	tr|A0A0B4J2A0|A0A0B4J2A0_HUMAN Uncharacterized protein OS=Homo sapiens OX=9606 PE=1 SV=1;sp|Q9UHJ6|SHPK_HUMAN Sedoheptulokinase OS=Homo sapiens OX=9606 GN=SHPK PE=1 SV=3	2	13	13	13	6	6	6	7	5	8	5	6	5	8	6	6	6	7	5	8	5	6	5	8	6	6	6	7	5	8
P10155	60 kDa SS-A/Ro ribonucleoprotein	TROVE2	1.0339	1.0715	1.0218	1.0208	1.0363	1.0434	0.91045	0.87615	0.88573	0.908	P10155	22	22	22	60 kDa SS-A/Ro ribonucleoprotein	TROVE2	sp|P10155|RO60_HUMAN 60 kDa SS-A/Ro ribonucleoprotein OS=Homo sapiens OX=9606 GN=TROVE2 PE=1 SV=2	1	22	22	22	13	10	11	11	13	15	13	12	13	12	13	10	11	11	13	15	13	12	13	12	13	10	11	11	13	15
Q96Q11	CCA tRNA nucleotidyltransferase 1, mitochondrial	TRNT1	0.69929	1.0603	0.72124	0.92025	1.0544	1.0321	1.3031	0.86471	0.90498	1.1739	Q96Q11	10	10	10	CCA tRNA nucleotidyltransferase 1, mitochondrial	TRNT1	sp|Q96Q11|TRNT1_HUMAN CCA tRNA nucleotidyltransferase 1, mitochondrial OS=Homo sapiens OX=9606 GN=TRNT1 PE=1 SV=2	1	10	10	10	5	3	3	2	2	1	7	6	1	2	5	3	3	2	2	1	7	6	1	2	5	3	3	2	2	1
Q96FX7	tRNA (adenine(58)-N(1))-methyltransferase catalytic subunit TRMT61A	TRMT61A	1.0096	NaN	0.79557	NaN	1.0311	1.107	0.86281	0.78204	NaN	NaN	Q96FX7	4	4	4	tRNA (adenine(58)-N(1))-methyltransferase catalytic subunit TRMT61A	TRMT61A	sp|Q96FX7|TRM61_HUMAN tRNA (adenine(58)-N(1))-methyltransferase catalytic subunit TRMT61A OS=Homo sapiens OX=9606 GN=TRMT61A PE=1 SV=1	1	4	4	4	1	1	2	2	1	1	3	4	2	1	1	1	2	2	1	1	3	4	2	1	1	1	2	2	1	1
Q9UJA5	tRNA (adenine(58)-N(1))-methyltransferase non-catalytic subunit TRM6	TRMT6	0.97348	0.77436	1.0301	0.81327	1.0524	1.1185	0.95938	0.94929	1.0664	0.94768	Q9UJA5	9	9	9	tRNA (adenine(58)-N(1))-methyltransferase non-catalytic subunit TRM6	TRMT6	sp|Q9UJA5|TRM6_HUMAN tRNA (adenine(58)-N(1))-methyltransferase non-catalytic subunit TRM6 OS=Homo sapiens OX=9606 GN=TRMT6 PE=1 SV=1	1	9	9	9	3	1	2	3	3	2	1	4	6	2	3	1	2	3	3	2	1	4	6	2	3	1	2	3	3	2
Q32P41	tRNA (guanine(37)-N1)-methyltransferase	TRMT5	1.0146	0.94047	1.2853	1.1017	1.1424	1.0418	0.8556	1.0279	0.86703	0.85222	Q32P41	12	12	12	tRNA (guanine(37)-N1)-methyltransferase	TRMT5	sp|Q32P41|TRM5_HUMAN tRNA (guanine(37)-N1)-methyltransferase OS=Homo sapiens OX=9606 GN=TRMT5 PE=1 SV=2	1	12	12	12	4	5	6	7	4	4	4	4	6	7	4	5	6	7	4	4	4	4	6	7	4	5	6	7	4	4
Q8IZ69	tRNA (uracil-5-)-methyltransferase homolog A	TRMT2A	1.0448	0.91846	NaN	0.77318	1.3636	1.3039	1.0859	0.76533	NaN	NaN	Q8IZ69	7	7	7	tRNA (uracil-5-)-methyltransferase homolog A	TRMT2A	sp|Q8IZ69|TRM2A_HUMAN tRNA (uracil-5-)-methyltransferase homolog A OS=Homo sapiens OX=9606 GN=TRMT2A PE=1 SV=2	1	7	7	7	0	1	4	1	0	0	4	4	2	2	0	1	4	1	0	0	4	4	2	2	0	1	4	1	0	0
Q7Z2T5	TRMT1-like protein	TRMT1L	0.96364	0.95288	0.90314	1.1022	1.0137	1.0711	0.85702	1.193	1.7931	1.3106	Q7Z2T5	12	12	12	TRMT1-like protein	TRMT1L	sp|Q7Z2T5|TRM1L_HUMAN TRMT1-like protein OS=Homo sapiens OX=9606 GN=TRMT1L PE=1 SV=2	1	12	12	12	8	8	7	4	2	2	5	7	4	5	8	8	7	4	2	2	5	7	4	5	8	8	7	4	2	2
Q9UI30	Multifunctional methyltransferase subunit TRM112-like protein	TRMT112	1.05	1.0046	0.98788	1.0177	1.0163	1.0443	0.96267	0.96445	1.0576	0.98062	Q9UI30	7	7	7	Multifunctional methyltransferase subunit TRM112-like protein	TRMT112	sp|Q9UI30|TR112_HUMAN Multifunctional methyltransferase subunit TRM112-like protein OS=Homo sapiens OX=9606 GN=TRMT112 PE=1 SV=1	1	7	7	7	5	4	5	5	4	3	5	6	7	5	5	4	5	5	4	3	5	6	7	5	5	4	5	5	4	3
Q7Z4G4	tRNA (guanine(10)-N2)-methyltransferase homolog	TRMT11	NaN	0.30073	NaN	NaN	0.24964	0.45419	0.28088	0.44531	NaN	NaN	Q7Z4G4	1	1	1	tRNA (guanine(10)-N2)-methyltransferase homolog	TRMT11	sp|Q7Z4G4|TRM11_HUMAN tRNA (guanine(10)-N2)-methyltransferase homolog OS=Homo sapiens OX=9606 GN=TRMT11 PE=1 SV=1	1	1	1	1	0	0	1	1	0	0	1	1	0	1	0	0	1	1	0	0	1	1	0	1	0	0	1	1	0	0
Q7L0Y3	Mitochondrial ribonuclease P protein 1	TRMT10C	0.99242	0.98246	0.9619	0.94765	1.0311	0.96559	1.0167	0.9997	0.96849	0.9756	Q7L0Y3	25	25	25	Mitochondrial ribonuclease P protein 1	TRMT10C	sp|Q7L0Y3|TM10C_HUMAN tRNA methyltransferase 10 homolog C OS=Homo sapiens OX=9606 GN=TRMT10C PE=1 SV=2	1	25	25	25	18	19	19	20	11	12	20	18	19	19	18	19	19	20	11	12	20	18	19	19	18	19	19	20	11	12
Q8TBZ6	tRNA methyltransferase 10 homolog A	TRMT10A	0.87924	0.61532	0.41292	0.31943	0.91298	0.80901	0.70551	0.70274	0.3447	NaN	Q8TBZ6	6	6	6	tRNA methyltransferase 10 homolog A	TRMT10A	sp|Q8TBZ6|TM10A_HUMAN tRNA methyltransferase 10 homolog A OS=Homo sapiens OX=9606 GN=TRMT10A PE=1 SV=1	1	6	6	6	1	2	4	2	1	1	4	3	5	2	1	2	4	2	1	1	4	3	5	2	1	2	4	2	1	1
Q9NXH9	tRNA (guanine(26)-N(2))-dimethyltransferase	TRMT1	1.023	0.93781	0.9221	0.92472	0.97719	0.90316	0.7134	0.72192	0.8868	0.75223	Q9NXH9	16	16	16	tRNA (guanine(26)-N(2))-dimethyltransferase	TRMT1	sp|Q9NXH9|TRM1_HUMAN tRNA (guanine(26)-N(2))-dimethyltransferase OS=Homo sapiens OX=9606 GN=TRMT1 PE=1 SV=1	1	16	16	16	10	11	12	10	8	7	11	10	11	12	10	11	12	10	8	7	11	10	11	12	10	11	12	10	8	7
Q15654	Thyroid receptor-interacting protein 6	TRIP6	0.93264	1.0266	0.92455	0.88273	0.91482	0.90371	0.7934	0.82236	0.757	0.87364	Q15654	19	19	19	Thyroid receptor-interacting protein 6	TRIP6	sp|Q15654|TRIP6_HUMAN Thyroid receptor-interacting protein 6 OS=Homo sapiens OX=9606 GN=TRIP6 PE=1 SV=3	1	19	19	19	11	9	11	12	9	10	8	9	14	12	11	9	11	12	9	10	8	9	14	12	11	9	11	12	9	10
Q15650	Activating signal cointegrator 1	TRIP4	1.2787	0.85685	1.1201	0.89456	1.0811	1.2111	1.1653	0.99781	NaN	NaN	Q15650	6	5	5	Activating signal cointegrator 1	TRIP4	sp|Q15650|TRIP4_HUMAN Activating signal cointegrator 1 OS=Homo sapiens OX=9606 GN=TRIP4 PE=1 SV=4	1	6	5	5	2	3	3	4	1	1	3	1	3	1	2	3	3	4	1	1	2	1	3	1	2	3	3	4	1	1
Q15645	Pachytene checkpoint protein 2 homolog	TRIP13	1.0645	1.1692	1.0077	1.0376	1.1131	1.1573	0.92222	0.87032	1.3265	1.3067	Q15645	15	15	15	Pachytene checkpoint protein 2 homolog	TRIP13	sp|Q15645|PCH2_HUMAN Pachytene checkpoint protein 2 homolog OS=Homo sapiens OX=9606 GN=TRIP13 PE=1 SV=2	1	15	15	15	12	11	11	8	8	6	11	11	12	11	12	11	11	8	8	6	11	11	12	11	12	11	11	8	8	6
Q14669	E3 ubiquitin-protein ligase TRIP12	TRIP12	1.0309	0.97325	0.98106	0.97101	1.0277	1.0061	0.97722	0.89988	0.90315	0.89578	Q14669	45	45	45	E3 ubiquitin-protein ligase TRIP12	TRIP12	sp|Q14669|TRIPC_HUMAN E3 ubiquitin-protein ligase TRIP12 OS=Homo sapiens OX=9606 GN=TRIP12 PE=1 SV=1	1	45	45	45	22	22	22	20	24	21	20	21	24	24	22	22	22	20	24	21	20	21	24	24	22	22	22	20	24	21
Q15643	Thyroid receptor-interacting protein 11	TRIP11	0.95364	0.80829	2.0879	0.97624	1.1364	1.0349	1.5002	0.71131	1.2928	0.43873	Q15643	8	8	7	Thyroid receptor-interacting protein 11	TRIP11	sp|Q15643|TRIPB_HUMAN Thyroid receptor-interacting protein 11 OS=Homo sapiens OX=9606 GN=TRIP11 PE=1 SV=3	1	8	8	7	3	4	2	2	2	2	4	1	2	4	3	4	2	2	2	2	4	1	2	4	2	3	2	2	2	2
Q15642	Cdc42-interacting protein 4	TRIP10	1.009	0.92473	0.971	1.0118	0.9218	0.90721	1.0706	1.0937	0.94909	1.0451	Q15642	22	22	22	Cdc42-interacting protein 4	TRIP10	sp|Q15642|CIP4_HUMAN Cdc42-interacting protein 4 OS=Homo sapiens OX=9606 GN=TRIP10 PE=1 SV=3	1	22	22	22	15	12	11	11	8	9	10	12	11	13	15	12	11	11	8	9	10	12	11	13	15	12	11	11	8	9
Q9H2D6	TRIO and F-actin-binding protein	TRIOBP	1.1889	1.8814	1.1163	1.089	0.99883	1.6929	1.6994	1.9129	1.4641	0.3851	Q9H2D6	10	9	9	TRIO and F-actin-binding protein	TRIOBP	sp|Q9H2D6|TARA_HUMAN TRIO and F-actin-binding protein OS=Homo sapiens OX=9606 GN=TRIOBP PE=1 SV=3	1	10	9	9	4	3	3	4	2	3	1	4	1	2	4	3	3	4	2	3	1	3	1	2	4	3	3	4	2	3
O75962	Triple functional domain protein	TRIO	0.98012	NaN	0.98161	NaN	NaN	NaN	1.2094	NaN	NaN	0.13185	O75962	4	4	3	Triple functional domain protein	TRIO	sp|O75962|TRIO_HUMAN Triple functional domain protein OS=Homo sapiens OX=9606 GN=TRIO PE=1 SV=2	1	4	4	3	1	0	1	0	0	1	0	0	2	0	1	0	1	0	0	1	0	0	2	0	1	0	1	0	0	1
Q6ZMU5	Tripartite motif-containing protein 72	TRIM72	0.97179	0.97073	0.98906	1.0025	1.0392	1.0806	1.23	1.281	0.48185	0.49606	Q6ZMU5	21	21	21	Tripartite motif-containing protein 72	TRIM72	sp|Q6ZMU5|TRI72_HUMAN Tripartite motif-containing protein 72 OS=Homo sapiens OX=9606 GN=TRIM72 PE=1 SV=2	1	21	21	21	15	14	14	13	12	14	12	12	15	16	15	14	14	13	12	14	12	12	15	16	15	14	14	13	12	14
Q6PJ69	Tripartite motif-containing protein 65	TRIM65	1.118	1.0418	0.96228	1.1763	1.5049	1.0975	1.0982	0.94909	0.85169	0.84397	Q6PJ69	7	7	7	Tripartite motif-containing protein 65	TRIM65	sp|Q6PJ69|TRI65_HUMAN Tripartite motif-containing protein 65 OS=Homo sapiens OX=9606 GN=TRIM65 PE=1 SV=3	1	7	7	7	2	1	1	2	3	1	1	4	2	2	2	1	1	2	3	1	1	4	2	2	2	1	1	2	3	1
Q9BRZ2	E3 ubiquitin-protein ligase TRIM56	TRIM56	NaN	0.44784	0.16496	NaN	1.0883	NaN	NaN	NaN	0.42732	0.63975	Q9BRZ2	5	5	5	E3 ubiquitin-protein ligase TRIM56	TRIM56	sp|Q9BRZ2|TRI56_HUMAN E3 ubiquitin-protein ligase TRIM56 OS=Homo sapiens OX=9606 GN=TRIM56 PE=1 SV=3	1	5	5	5	1	0	0	0	2	1	2	0	0	1	1	0	0	0	2	1	2	0	0	1	1	0	0	0	2	1
Q96LD4	Tripartite motif-containing protein 47	TRIM47	0.81854	0.50722	0.49808	0.75095	0.66039	0.86441	1.0422	1.1327	0.9023	0.94935	Q96LD4	10	10	10	Tripartite motif-containing protein 47	TRIM47	sp|Q96LD4|TRI47_HUMAN E3 ubiquitin-protein ligase TRIM47 OS=Homo sapiens OX=9606 GN=TRIM47 PE=1 SV=2	1	10	10	10	3	4	3	2	5	3	4	5	4	3	3	4	3	2	5	3	4	5	4	3	3	4	3	2	5	3
Q9C037	E3 ubiquitin-protein ligase TRIM4	TRIM4	0.93643	0.98395	1.3883	0.95789	1.0062	1.1274	0.87594	0.83402	NaN	NaN	Q9C037	2	2	2	E3 ubiquitin-protein ligase TRIM4	TRIM4	sp|Q9C037|TRIM4_HUMAN E3 ubiquitin-protein ligase TRIM4 OS=Homo sapiens OX=9606 GN=TRIM4 PE=1 SV=2	1	2	2	2	2	1	1	1	0	0	1	1	1	1	2	1	1	1	0	0	1	1	1	1	2	1	1	1	0	0
Q9UPN9	E3 ubiquitin-protein ligase TRIM33	TRIM33	0.98285	0.86142	0.99685	0.89901	1.0068	1.0869	1.1642	0.93382	1.3143	1.4105	Q9UPN9	22	22	21	E3 ubiquitin-protein ligase TRIM33	TRIM33	sp|Q9UPN9|TRI33_HUMAN E3 ubiquitin-protein ligase TRIM33 OS=Homo sapiens OX=9606 GN=TRIM33 PE=1 SV=3	1	22	22	21	10	10	9	11	6	5	12	13	8	10	10	10	9	11	6	5	12	13	8	10	10	10	9	10	6	5
Q13049	E3 ubiquitin-protein ligase TRIM32	TRIM32	0.94747	1.065	1.1364	0.98703	1.1497	0.94078	1.0299	1.2249	0.95151	0.99831	Q13049	10	10	10	E3 ubiquitin-protein ligase TRIM32	TRIM32	sp|Q13049|TRI32_HUMAN E3 ubiquitin-protein ligase TRIM32 OS=Homo sapiens OX=9606 GN=TRIM32 PE=1 SV=2	1	10	10	10	5	2	5	5	3	3	3	1	3	5	5	2	5	5	3	3	3	1	3	5	5	2	5	5	3	3
Q13263	Transcription intermediary factor 1-beta	TRIM28	0.94286	0.978	0.94549	0.94441	0.90756	0.93924	0.80645	0.81944	1.1303	1.1241	Q13263	47	47	47	Transcription intermediary factor 1-beta	TRIM28	sp|Q13263|TIF1B_HUMAN Transcription intermediary factor 1-beta OS=Homo sapiens OX=9606 GN=TRIM28 PE=1 SV=5	1	47	47	47	29	29	28	27	36	38	27	29	27	29	29	29	28	27	36	38	27	29	27	29	29	29	28	27	36	38
P14373	Zinc finger protein RFP	TRIM27	0.99009	1.021	1.149	1.6891	1.2405	1.2855	1.0325	1.2353	1.0763	0.93986	P14373	6	6	6	Zinc finger protein RFP	TRIM27	sp|P14373|TRI27_HUMAN Zinc finger protein RFP OS=Homo sapiens OX=9606 GN=TRIM27 PE=1 SV=1	1	6	6	6	3	2	3	3	4	2	3	3	3	2	3	2	3	3	4	2	3	3	3	2	3	2	3	3	4	2
Q12899	Tripartite motif-containing protein 26	TRIM26	0.81479	0.97061	0.79489	1.0431	1.3513	0.91037	0.9251	1.0197	NaN	NaN	Q12899	4	4	4	Tripartite motif-containing protein 26	TRIM26	sp|Q12899|TRI26_HUMAN Tripartite motif-containing protein 26 OS=Homo sapiens OX=9606 GN=TRIM26 PE=1 SV=1	1	4	4	4	1	1	4	1	0	0	2	1	2	2	1	1	4	1	0	0	2	1	2	2	1	1	4	1	0	0
Q14258	E3 ubiquitin/ISG15 ligase TRIM25	TRIM25	0.97497	1.0167	0.9699	1.0058	1.0092	1.0545	0.89869	0.91649	0.92248	0.90595	Q14258	38	38	38	E3 ubiquitin/ISG15 ligase TRIM25	TRIM25	sp|Q14258|TRI25_HUMAN E3 ubiquitin/ISG15 ligase TRIM25 OS=Homo sapiens OX=9606 GN=TRIM25 PE=1 SV=2	1	38	38	38	27	27	28	28	27	25	27	26	29	28	27	27	28	28	27	25	27	26	29	28	27	27	28	28	27	25
O15164	Transcription intermediary factor 1-alpha	TRIM24	NaN	0.72877	NaN	0.92997	1.1426	1.5162	1.0947	NaN	NaN	NaN	O15164	9	8	8	Transcription intermediary factor 1-alpha	TRIM24	sp|O15164|TIF1A_HUMAN Transcription intermediary factor 1-alpha OS=Homo sapiens OX=9606 GN=TRIM24 PE=1 SV=3	1	9	8	8	0	1	1	1	1	3	3	3	0	1	0	1	1	0	1	3	3	2	0	1	0	1	1	0	1	3
P36406;P56559;P40617	E3 ubiquitin-protein ligase TRIM23;ADP-ribosylation factor-like protein 4C;ADP-ribosylation factor-like protein 4A	TRIM23;ARL4C;ARL4A	0.91237	0.98679	0.85988	0.92897	0.9242	0.91311	0.99993	1.0898	NaN	NaN	P36406;P56559;P40617	2;1;1	2;1;1	2;1;1	E3 ubiquitin-protein ligase TRIM23;ADP-ribosylation factor-like protein 4C;ADP-ribosylation factor-like protein 4A	TRIM23;ARL4C;ARL4A	sp|P36406|TRI23_HUMAN E3 ubiquitin-protein ligase TRIM23 OS=Homo sapiens OX=9606 GN=TRIM23 PE=1 SV=1;sp|P56559|ARL4C_HUMAN ADP-ribosylation factor-like protein 4C OS=Homo sapiens OX=9606 GN=ARL4C PE=1 SV=1;sp|P40617|ARL4A_HUMAN ADP-ribosylation factor-like	3	2	2	2	2	2	2	1	0	0	2	1	2	1	2	2	2	1	0	0	2	1	2	1	2	2	2	1	0	0
P19474	E3 ubiquitin-protein ligase TRIM21	TRIM21	NaN	0.59967	NaN	NaN	1.1016	NaN	NaN	NaN	NaN	NaN	P19474	2	2	2	E3 ubiquitin-protein ligase TRIM21	TRIM21	sp|P19474|RO52_HUMAN E3 ubiquitin-protein ligase TRIM21 OS=Homo sapiens OX=9606 GN=TRIM21 PE=1 SV=1	1	2	2	2	0	1	0	0	0	0	1	0	0	1	0	1	0	0	0	0	1	0	0	1	0	1	0	0	0	0
O95361;H0Y626;Q309B1	Tripartite motif-containing protein 16;Tripartite motif-containing protein 16-like protein	TRIM16;TRIM16L	0.85101	1.0445	0.90628	1.066	0.97643	0.6808	0.92956	0.93624	1.0789	NaN	O95361;H0Y626;Q309B1	10;9;5	10;9;5	10;9;5	Tripartite motif-containing protein 16;Tripartite motif-containing protein 16-like protein	TRIM16;TRIM16L	sp|O95361|TRI16_HUMAN Tripartite motif-containing protein 16 OS=Homo sapiens OX=9606 GN=TRIM16 PE=1 SV=3;tr|H0Y626|H0Y626_HUMAN Uncharacterized protein OS=Homo sapiens OX=9606 PE=4 SV=2;sp|Q309B1|TR16L_HUMAN Tripartite motif-containing protein 16-like prot	3	10	10	10	2	2	3	1	2	0	7	6	2	5	2	2	3	1	2	0	7	6	2	5	2	2	3	1	2	0
Q96F44	E3 ubiquitin-protein ligase TRIM11	TRIM11	NaN	NaN	0.91145	0.82181	0.8273	1.0432	0.95409	0.84408	NaN	NaN	Q96F44	3	3	3	E3 ubiquitin-protein ligase TRIM11	TRIM11	sp|Q96F44|TRI11_HUMAN E3 ubiquitin-protein ligase TRIM11 OS=Homo sapiens OX=9606 GN=TRIM11 PE=1 SV=2	1	3	3	3	1	1	2	1	0	0	1	2	0	0	1	1	2	1	0	0	1	2	0	0	1	1	2	1	0	0
Q96RU8	Tribbles homolog 1	TRIB1	1.2067	NaN	NaN	NaN	NaN	0.80445	0.51904	0.89949	NaN	NaN	Q96RU8	3	3	3	Tribbles homolog 1	TRIB1	sp|Q96RU8|TRIB1_HUMAN Tribbles homolog 1 OS=Homo sapiens OX=9606 GN=TRIB1 PE=1 SV=2	1	3	3	3	0	0	1	1	0	0	0	1	1	0	0	0	1	1	0	0	0	1	1	0	0	0	1	1	0	0
O43715	TP53-regulated inhibitor of apoptosis 1	TRIAP1	NaN	0.88394	1.112	0.94282	1.2131	1.0868	1.0863	1.1507	NaN	NaN	O43715	2	2	2	TP53-regulated inhibitor of apoptosis 1	TRIAP1	sp|O43715|TRIA1_HUMAN TP53-regulated inhibitor of apoptosis 1 OS=Homo sapiens OX=9606 GN=TRIAP1 PE=1 SV=1	1	2	2	2	1	1	1	2	0	0	1	1	0	1	1	1	1	2	0	0	1	1	0	1	1	1	1	2	0	0
Q9Y2L5	Trafficking protein particle complex subunit 8	TRAPPC8	NaN	0.84673	1.0957	0.9639	1.0953	1.07	1.0594	1.1095	NaN	NaN	Q9Y2L5	3	3	3	Trafficking protein particle complex subunit 8	TRAPPC8	sp|Q9Y2L5|TPPC8_HUMAN Trafficking protein particle complex subunit 8 OS=Homo sapiens OX=9606 GN=TRAPPC8 PE=1 SV=2	1	3	3	3	2	1	2	1	0	0	1	1	0	1	2	1	2	1	0	0	1	1	0	1	2	1	2	1	0	0
Q9Y296	Trafficking protein particle complex subunit 4	TRAPPC4	1.4588	1.3353	NaN	1.0644	NaN	NaN	NaN	NaN	1.5007	1.4283	Q9Y296	3	3	3	Trafficking protein particle complex subunit 4	TRAPPC4	sp|Q9Y296|TPPC4_HUMAN Trafficking protein particle complex subunit 4 OS=Homo sapiens OX=9606 GN=TRAPPC4 PE=1 SV=1	1	3	3	3	0	1	0	0	1	1	0	0	1	1	0	1	0	0	1	1	0	0	1	1	0	1	0	0	1	1
O43617	Trafficking protein particle complex subunit 3	TRAPPC3	1.0198	0.79688	0.86451	0.89576	0.87008	0.90025	0.90317	0.93505	1.4227	1.3086	O43617	8	8	8	Trafficking protein particle complex subunit 3	TRAPPC3	sp|O43617|TPPC3_HUMAN Trafficking protein particle complex subunit 3 OS=Homo sapiens OX=9606 GN=TRAPPC3 PE=1 SV=1	1	8	8	8	6	6	6	6	3	4	6	5	6	6	6	6	6	6	3	4	6	5	6	6	6	6	6	6	3	4
H3BP13;Q9UL33	Trafficking protein particle complex subunit 2-like protein	TRAPPC2L	NaN	0.89707	0.75436	0.90242	NaN	NaN	0.89279	NaN	NaN	NaN	H3BP13;Q9UL33	3;3	3;3	3;3	Trafficking protein particle complex subunit 2-like protein	TRAPPC2L	tr|H3BP13|H3BP13_HUMAN Trafficking protein particle complex subunit 2-like protein OS=Homo sapiens OX=9606 GN=TRAPPC2L PE=1 SV=1;sp|Q9UL33|TPC2L_HUMAN Trafficking protein particle complex subunit 2-like protein OS=Homo sapiens OX=9606 GN=TRAPPC2L PE=1 SV=1	2	3	3	3	2	1	3	0	0	0	0	0	0	3	2	1	3	0	0	0	0	0	0	3	2	1	3	0	0	0
A5PLN9	Trafficking protein particle complex subunit 13	TRAPPC13	NaN	1.1255	0.83694	0.86025	1.0246	0.92697	1.0367	1.2874	NaN	NaN	A5PLN9	3	3	3	Trafficking protein particle complex subunit 13	TRAPPC13	sp|A5PLN9|TPC13_HUMAN Trafficking protein particle complex subunit 13 OS=Homo sapiens OX=9606 GN=TRAPPC13 PE=1 SV=2	1	3	3	3	1	1	2	1	1	0	1	1	0	1	1	1	2	1	1	0	1	1	0	1	1	1	2	1	1	0
Q7Z392	Trafficking protein particle complex subunit 11	TRAPPC11	NaN	NaN	NaN	NaN	1.1656	1.4664	NaN	NaN	NaN	NaN	Q7Z392	1	1	1	Trafficking protein particle complex subunit 11	TRAPPC11	sp|Q7Z392|TPC11_HUMAN Trafficking protein particle complex subunit 11 OS=Homo sapiens OX=9606 GN=TRAPPC11 PE=1 SV=2	1	1	1	1	0	0	0	0	0	0	1	1	0	0	0	0	0	0	0	0	1	1	0	0	0	0	0	0	0	0
P48553;A0A096LPH7	Trafficking protein particle complex subunit 10	TRAPPC10;LOC102724200	NaN	NaN	NaN	29.34	NaN	NaN	0.43885	NaN	1.0549	NaN	P48553;A0A096LPH7	3;2	3;2	3;2	Trafficking protein particle complex subunit 10	TRAPPC10;LOC102724200	sp|P48553|TPC10_HUMAN Trafficking protein particle complex subunit 10 OS=Homo sapiens OX=9606 GN=TRAPPC10 PE=1 SV=2;tr|A0A096LPH7|A0A096LPH7_HUMAN Uncharacterized protein (Fragment) OS=Homo sapiens OX=9606 GN=LOC102724200 PE=4 SV=1	2	3	3	3	0	1	1	0	1	0	0	0	0	0	0	1	1	0	1	0	0	0	0	0	0	1	1	0	1	0
Q12931;Q9NXD2	Heat shock protein 75 kDa, mitochondrial	TRAP1	1.0351	1.061	1.009	1.03	1.0424	1.0733	0.98902	0.97491	0.98026	1.0065	Q12931	43;1	43;1	43;1	Heat shock protein 75 kDa, mitochondrial	TRAP1	sp|Q12931|TRAP1_HUMAN Heat shock protein 75 kDa, mitochondrial OS=Homo sapiens OX=9606 GN=TRAP1 PE=1 SV=3	2	43	43	43	28	28	30	29	29	31	32	32	32	31	28	28	30	29	29	31	32	32	32	31	28	28	30	29	29	31
Q15629	Translocating chain-associated membrane protein 1	TRAM1	0.89452	0.90623	0.80088	0.99273	NaN	1.1323	0.97123	0.87124	0.86038	0.87734	Q15629	4	4	4	Translocating chain-associated membrane protein 1	TRAM1	sp|Q15629|TRAM1_HUMAN Translocating chain-associated membrane protein 1 OS=Homo sapiens OX=9606 GN=TRAM1 PE=1 SV=3	1	4	4	4	1	1	1	1	2	3	0	1	1	2	1	1	1	1	2	3	0	1	1	2	1	1	1	1	2	3
O14545	TRAF-type zinc finger domain-containing protein 1	TRAFD1	1.1708	0.92745	NaN	0.88134	NaN	0.99787	0.56919	0.68289	1.0937	0.68448	O14545	7	7	7	TRAF-type zinc finger domain-containing protein 1	TRAFD1	sp|O14545|TRAD1_HUMAN TRAF-type zinc finger domain-containing protein 1 OS=Homo sapiens OX=9606 GN=TRAFD1 PE=1 SV=1	1	7	7	7	2	1	1	2	3	2	1	1	3	4	2	1	1	2	3	2	1	1	3	4	2	1	1	2	3	2
Q12933	TNF receptor-associated factor 2	TRAF2	0.87289	0.9077	0.87879	1.0851	1.0534	1.1342	0.85435	0.87532	NaN	0.92775	Q12933	6	6	6	TNF receptor-associated factor 2	TRAF2	sp|Q12933|TRAF2_HUMAN TNF receptor-associated factor 2 OS=Homo sapiens OX=9606 GN=TRAF2 PE=1 SV=2	1	6	6	6	3	4	3	3	0	2	3	3	3	4	3	4	3	3	0	2	3	3	3	4	3	4	3	3	0	2
Q15628	Tumor necrosis factor receptor type 1-associated DEATH domain protein	TRADD	0.88967	0.90558	0.99024	0.85779	0.89618	0.81403	0.82021	0.96488	NaN	NaN	Q15628	2	2	2	Tumor necrosis factor receptor type 1-associated DEATH domain protein	TRADD	sp|Q15628|TRADD_HUMAN Tumor necrosis factor receptor type 1-associated DEATH domain protein OS=Homo sapiens OX=9606 GN=TRADD PE=1 SV=2	1	2	2	2	2	1	1	2	0	0	1	1	1	1	2	1	1	2	0	0	1	1	1	1	2	1	1	2	0	0
Q9H4I3	TraB domain-containing protein	TRABD	NaN	NaN	NaN	NaN	NaN	NaN	NaN	NaN	NaN	0.9122	Q9H4I3	1	1	1	TraB domain-containing protein	TRABD	sp|Q9H4I3|TRABD_HUMAN TraB domain-containing protein OS=Homo sapiens OX=9606 GN=TRABD PE=1 SV=1	1	1	1	1	0	0	0	0	1	1	0	0	0	0	0	0	0	0	1	1	0	0	0	0	0	0	0	0	1	1
P62995	Transformer-2 protein homolog beta	TRA2B	1.0125	1.0595	1.0339	1.0922	1.0212	1.0712	0.97627	0.91915	0.96615	0.95959	P62995	11	11	10	Transformer-2 protein homolog beta	TRA2B	sp|P62995|TRA2B_HUMAN Transformer-2 protein homolog beta OS=Homo sapiens OX=9606 GN=TRA2B PE=1 SV=1	1	11	11	10	7	7	7	6	9	8	7	7	7	7	7	7	7	6	9	8	7	7	7	7	6	6	6	5	8	7
Q13595	Transformer-2 protein homolog alpha	TRA2A	1.1322	0.9961	1.2434	1.1046	0.99327	1.0317	0.90732	0.99531	1.2274	1.1944	Q13595	10	9	9	Transformer-2 protein homolog alpha	TRA2A	sp|Q13595|TRA2A_HUMAN Transformer-2 protein homolog alpha OS=Homo sapiens OX=9606 GN=TRA2A PE=1 SV=1	1	10	9	9	5	6	5	7	4	5	7	8	6	8	4	5	4	6	3	4	6	7	5	7	4	5	4	6	3	4
Q9ULW0	Targeting protein for Xklp2	TPX2	1.0334	0.93583	1.0677	1.0525	1.0718	0.9339	1.0194	1.0957	1.3725	1.5116	Q9ULW0	31	31	31	Targeting protein for Xklp2	TPX2	sp|Q9ULW0|TPX2_HUMAN Targeting protein for Xklp2 OS=Homo sapiens OX=9606 GN=TPX2 PE=1 SV=2	1	31	31	31	12	10	8	9	8	10	12	14	12	10	12	10	8	9	8	10	12	14	12	10	12	10	8	9	8	10
P13693;Q56UQ5;Q9HAU6	Translationally-controlled tumor protein	TPT1	1.0057	0.96188	1.0051	0.93527	0.92903	0.9349	0.97928	0.97465	0.84135	0.87283	P13693	16;3;1	16;3;1	16;3;1	Translationally-controlled tumor protein	TPT1	sp|P13693|TCTP_HUMAN Translationally-controlled tumor protein OS=Homo sapiens OX=9606 GN=TPT1 PE=1 SV=1	3	16	16	16	7	6	6	6	13	15	6	6	7	7	7	6	6	6	13	15	6	6	7	7	7	6	6	6	13	15
Q4KMQ1	Taperin	TPRN	0.67537	0.80189	0.83393	0.79281	0.83052	0.66139	1.2807	1.0552	NaN	NaN	Q4KMQ1	3	3	3	Taperin	TPRN	sp|Q4KMQ1|TPRN_HUMAN Taperin OS=Homo sapiens OX=9606 GN=TPRN PE=1 SV=2	1	3	3	3	3	3	3	3	0	0	1	2	2	2	3	3	3	3	0	0	1	2	2	2	3	3	3	3	0	0
Q9Y3C4	EKC/KEOPS complex subunit TPRKB	TPRKB	NaN	NaN	1.4757	1.055	1.2314	0.69886	NaN	2.8162	NaN	NaN	Q9Y3C4	5	5	5	EKC/KEOPS complex subunit TPRKB	TPRKB	sp|Q9Y3C4|TPRKB_HUMAN EKC/KEOPS complex subunit TPRKB OS=Homo sapiens OX=9606 GN=TPRKB PE=1 SV=1	1	5	5	5	1	1	0	1	0	0	2	3	0	1	1	1	0	1	0	0	2	3	0	1	1	1	0	1	0	0
Q5T0D9	Tumor protein p63-regulated gene 1-like protein	TPRG1L	NaN	NaN	1.1531	1.0424	0.98174	NaN	NaN	1.0993	NaN	1.0674	Q5T0D9	2	2	2	Tumor protein p63-regulated gene 1-like protein	TPRG1L	sp|Q5T0D9|TPRGL_HUMAN Tumor protein p63-regulated gene 1-like protein OS=Homo sapiens OX=9606 GN=TPRG1L PE=1 SV=1	1	2	2	2	1	1	0	1	0	1	1	0	0	0	1	1	0	1	0	1	1	0	0	0	1	1	0	1	0	1
P12270	Nucleoprotein TPR	TPR	0.99869	0.96387	1.051	0.97536	0.96499	0.98312	0.88063	0.90132	0.98174	0.97761	P12270	119	119	118	Nucleoprotein TPR	TPR	sp|P12270|TPR_HUMAN Nucleoprotein TPR OS=Homo sapiens OX=9606 GN=TPR PE=1 SV=3	1	119	119	118	66	66	65	60	65	66	65	67	77	71	66	66	65	60	65	66	65	67	77	71	65	65	64	59	65	66
P29144	Tripeptidyl-peptidase 2	TPP2	1.02	1.0697	0.93744	0.99776	1.0154	1.0312	0.88638	0.97243	1.0307	1.1302	P29144	34	34	34	Tripeptidyl-peptidase 2	TPP2	sp|P29144|TPP2_HUMAN Tripeptidyl-peptidase 2 OS=Homo sapiens OX=9606 GN=TPP2 PE=1 SV=4	1	34	34	34	14	19	16	17	8	10	22	22	15	18	14	19	16	17	8	10	22	22	15	18	14	19	16	17	8	10
O14773	Tripeptidyl-peptidase 1	TPP1	1.0453	0.97207	1.0437	1.0045	0.99111	0.93071	1.3603	1.3742	0.69538	0.60343	O14773	6	6	6	Tripeptidyl-peptidase 1	TPP1	sp|O14773|TPP1_HUMAN Tripeptidyl-peptidase 1 OS=Homo sapiens OX=9606 GN=TPP1 PE=1 SV=2	1	6	6	6	3	3	4	4	3	4	4	3	4	3	3	3	4	4	3	4	4	3	4	3	3	3	4	4	3	4
P51580	Thiopurine S-methyltransferase	TPMT	0.9509	1.0034	1.0852	1.0443	1.015	0.88253	1.2707	1.0499	NaN	NaN	P51580	6	6	6	Thiopurine S-methyltransferase	TPMT	sp|P51580|TPMT_HUMAN Thiopurine S-methyltransferase OS=Homo sapiens OX=9606 GN=TPMT PE=1 SV=1	1	6	6	6	3	5	3	4	1	0	4	2	4	5	3	5	3	4	1	0	4	2	4	5	3	5	3	4	1	0
P67936	Tropomyosin alpha-4 chain	TPM4	1.0349	0.97629	1.0456	0.9385	0.92321	1.016	1.1274	1.1415	0.91887	0.89448	P67936	36	36	15	Tropomyosin alpha-4 chain	TPM4	sp|P67936|TPM4_HUMAN Tropomyosin alpha-4 chain OS=Homo sapiens OX=9606 GN=TPM4 PE=1 SV=3	1	36	36	15	17	15	16	17	24	21	16	15	18	17	17	15	16	17	24	21	16	15	18	17	8	7	8	8	11	8
P06753	Tropomyosin alpha-3 chain	TPM3	0.98086	0.97321	1.0268	0.97309	0.92748	0.95939	1.3074	1.3306	0.98455	0.99327	P06753	33	15	12	Tropomyosin alpha-3 chain	TPM3	sp|P06753|TPM3_HUMAN Tropomyosin alpha-3 chain OS=Homo sapiens OX=9606 GN=TPM3 PE=1 SV=2	1	33	15	12	14	13	12	11	20	21	11	11	13	13	7	7	6	4	8	10	5	5	6	6	5	5	3	3	7	9
P09493	Tropomyosin alpha-1 chain	TPM1	1.0044	0.97309	1.0745	1.0706	0.94608	0.9276	1.1895	1.2014	0.98455	0.7608	P09493	22	3	3	Tropomyosin alpha-1 chain	TPM1	sp|P09493|TPM1_HUMAN Tropomyosin alpha-1 chain OS=Homo sapiens OX=9606 GN=TPM1 PE=1 SV=2	1	22	3	3	9	8	9	8	15	13	8	8	8	8	1	1	1	1	1	1	1	1	1	1	1	1	1	1	1	1
P60174	Triosephosphate isomerase	TPI1	0.98571	0.96932	0.96206	0.98197	1.0263	1.0315	1.0695	1.0779	1.0139	0.99666	P60174	30	30	30	Triosephosphate isomerase	TPI1	sp|P60174|TPIS_HUMAN Triosephosphate isomerase OS=Homo sapiens OX=9606 GN=TPI1 PE=1 SV=3	1	30	30	30	17	17	17	16	28	30	16	17	17	17	17	17	17	16	28	30	16	17	17	17	17	17	17	16	28	30
O43399	Tumor protein D54	TPD52L2	1.0281	1.0064	1.0377	0.96025	0.9537	1.0169	1.1518	1.155	0.93066	0.90719	O43399	19	19	19	Tumor protein D54	TPD52L2	sp|O43399|TPD54_HUMAN Tumor protein D54 OS=Homo sapiens OX=9606 GN=TPD52L2 PE=1 SV=2	1	19	19	19	13	13	13	13	12	12	13	12	14	13	13	13	13	13	12	12	13	12	14	13	13	13	13	13	12	12
Q16890	Tumor protein D53	TPD52L1	0.89344	1.1367	0.9172	1.0525	1.1734	0.97884	1.5163	1.4506	0.84133	0.98657	Q16890	8	8	8	Tumor protein D53	TPD52L1	sp|Q16890|TPD53_HUMAN Tumor protein D53 OS=Homo sapiens OX=9606 GN=TPD52L1 PE=1 SV=1	1	8	8	8	6	5	6	4	1	1	5	6	2	5	6	5	6	4	1	1	5	6	2	5	6	5	6	4	1	1
P55327	Tumor protein D52	TPD52	0.96513	1.1211	1.3422	1.3284	0.9249	1.0411	1.1098	1.0272	NaN	NaN	P55327	16	3	3	Tumor protein D52	TPD52	sp|P55327|TPD52_HUMAN Tumor protein D52 OS=Homo sapiens OX=9606 GN=TPD52 PE=1 SV=2	1	16	3	3	10	9	9	9	8	10	10	9	9	9	3	2	3	3	0	0	3	3	2	2	3	2	3	3	0	0
Q96S44	TP53-regulating kinase	TP53RK	0.90302	1.0267	0.98135	0.73507	0.96974	0.95301	1.0435	0.74344	0.99892	NaN	Q96S44	6	6	6	TP53-regulating kinase	TP53RK	sp|Q96S44|PRPK_HUMAN EKC/KEOPS complex subunit TP53RK OS=Homo sapiens OX=9606 GN=TP53RK PE=1 SV=2	1	6	6	6	2	1	4	3	1	1	3	3	3	3	2	1	4	3	1	1	3	3	3	3	2	1	4	3	1	1
Q53FA7	Quinone oxidoreductase PIG3	TP53I3	0.87983	0.74566	0.92088	1.0413	0.84192	0.90565	1.7008	2.0211	NaN	NaN	Q53FA7	5	5	5	Quinone oxidoreductase PIG3	TP53I3	sp|Q53FA7|QORX_HUMAN Quinone oxidoreductase PIG3 OS=Homo sapiens OX=9606 GN=TP53I3 PE=1 SV=2	1	5	5	5	3	2	1	1	0	0	2	1	2	1	3	2	1	1	0	0	2	1	2	1	3	2	1	1	0	0
Q13625	Apoptosis-stimulating of p53 protein 2	TP53BP2	1.2733	1.3025	1.129	1.1277	0.92139	0.99532	1.3488	1.2589	1.1709	NaN	Q13625	4	4	4	Apoptosis-stimulating of p53 protein 2	TP53BP2	sp|Q13625|ASPP2_HUMAN Apoptosis-stimulating of p53 protein 2 OS=Homo sapiens OX=9606 GN=TP53BP2 PE=1 SV=2	1	4	4	4	2	2	1	1	2	1	1	1	1	1	2	2	1	1	2	1	1	1	1	1	2	2	1	1	2	1
Q12888	Tumor suppressor p53-binding protein 1	TP53BP1	0.95116	0.86529	1.0026	0.93056	0.89439	0.87248	1.2784	1.3818	0.68209	1.069	Q12888	33	33	33	Tumor suppressor p53-binding protein 1	TP53BP1	sp|Q12888|TP53B_HUMAN TP53-binding protein 1 OS=Homo sapiens OX=9606 GN=TP53BP1 PE=1 SV=2	1	33	33	33	21	21	21	18	7	9	19	18	13	12	21	21	21	18	7	9	19	18	13	12	21	21	21	18	7	9
O94842;O15405;Q96NM4;O94900	TOX high mobility group box family member 4	TOX4	1.1543	0.96184	1.0286	1.0065	0.92009	0.69097	1.0882	1.1182	0.95243	1.1192	O94842	7;2;1;1	7;2;1;1	7;2;1;1	TOX high mobility group box family member 4	TOX4	sp|O94842|TOX4_HUMAN TOX high mobility group box family member 4 OS=Homo sapiens OX=9606 GN=TOX4 PE=1 SV=1	4	7	7	7	3	3	4	3	2	4	3	2	2	3	3	3	4	3	2	4	3	2	2	3	3	3	4	3	2	4
Q9NXH8	Torsin-4A	TOR4A	1.209	1.2935	1.0386	1.1979	1.3476	0.85182	1.1779	1.7311	NaN	NaN	Q9NXH8	6	6	6	Torsin-4A	TOR4A	sp|Q9NXH8|TOR4A_HUMAN Torsin-4A OS=Homo sapiens OX=9606 GN=TOR4A PE=1 SV=2	1	6	6	6	2	5	1	4	2	0	2	4	2	4	2	5	1	4	2	0	2	4	2	4	2	5	1	4	2	0
Q8NFQ8	Torsin-1A-interacting protein 2	TOR1AIP2	0.9747	0.99305	0.98436	0.99691	0.98231	1.0417	1.3107	1.3	1.204	1.1976	Q8NFQ8	14	13	13	Torsin-1A-interacting protein 2	TOR1AIP2	sp|Q8NFQ8|TOIP2_HUMAN Torsin-1A-interacting protein 2 OS=Homo sapiens OX=9606 GN=TOR1AIP2 PE=1 SV=1	1	14	13	13	11	9	8	8	2	3	7	7	9	8	10	8	8	8	2	3	7	7	9	8	10	8	8	8	2	3
Q5JTV8	Torsin-1A-interacting protein 1	TOR1AIP1	1.0182	0.9931	1.0742	0.98209	0.94461	0.94975	1.1562	1.1169	0.75779	0.74921	Q5JTV8	19	19	18	Torsin-1A-interacting protein 1	TOR1AIP1	sp|Q5JTV8|TOIP1_HUMAN Torsin-1A-interacting protein 1 OS=Homo sapiens OX=9606 GN=TOR1AIP1 PE=1 SV=2	1	19	19	18	16	12	12	12	11	10	11	10	13	13	16	12	12	12	11	10	11	10	13	13	15	11	12	12	11	10
O14656	Torsin-1A	TOR1A	NaN	NaN	NaN	NaN	NaN	0.89045	NaN	NaN	0.7619	0.59641	O14656	4	4	4	Torsin-1A	TOR1A	sp|O14656|TOR1A_HUMAN Torsin-1A OS=Homo sapiens OX=9606 GN=TOR1A PE=1 SV=1	1	4	4	4	0	0	0	0	3	2	0	2	0	0	0	0	0	0	3	2	0	2	0	0	0	0	0	0	3	2
Q92547	DNA topoisomerase 2-binding protein 1	TOPBP1	0.93277	0.92269	1.0077	0.77871	1.1105	0.84674	0.3783	1.0128	2.1406	NaN	Q92547	11	11	11	DNA topoisomerase 2-binding protein 1	TOPBP1	sp|Q92547|TOPB1_HUMAN DNA topoisomerase 2-binding protein 1 OS=Homo sapiens OX=9606 GN=TOPBP1 PE=1 SV=3	1	11	11	11	4	2	3	4	1	0	5	3	4	3	4	2	3	4	1	0	5	3	4	3	4	2	3	4	1	0
Q13472	DNA topoisomerase 3-alpha	TOP3A	0.80004	0.94284	0.98288	0.70311	0.88709	0.80626	0.939	0.79126	0.53413	1.108	Q13472	9	9	8	DNA topoisomerase 3-alpha	TOP3A	sp|Q13472|TOP3A_HUMAN DNA topoisomerase 3-alpha OS=Homo sapiens OX=9606 GN=TOP3A PE=1 SV=1	1	9	9	8	2	1	5	3	2	1	6	4	2	1	2	1	5	3	2	1	6	4	2	1	1	0	4	2	1	0
Q02880	DNA topoisomerase 2-beta	TOP2B	1.0384	0.90742	0.82064	0.99092	0.90377	0.88728	0.92688	0.83322	0.75424	1.0631	Q02880	33	17	17	DNA topoisomerase 2-beta	TOP2B	sp|Q02880|TOP2B_HUMAN DNA topoisomerase 2-beta OS=Homo sapiens OX=9606 GN=TOP2B PE=1 SV=3	1	33	17	17	15	18	20	24	3	6	24	24	18	18	3	7	8	10	1	1	10	11	5	7	3	7	8	10	1	1
P11388	DNA topoisomerase 2-alpha	TOP2A	0.93941	0.94481	0.97387	0.97326	1.0104	0.95911	0.90586	0.95981	1.3462	1.5195	P11388	64	64	48	DNA topoisomerase 2-alpha	TOP2A	sp|P11388|TOP2A_HUMAN DNA topoisomerase 2-alpha OS=Homo sapiens OX=9606 GN=TOP2A PE=1 SV=3	1	64	64	48	41	34	39	41	8	12	49	43	42	43	41	34	39	41	8	12	49	43	42	43	29	23	27	27	6	7
Q969P6	DNA topoisomerase I, mitochondrial	TOP1MT	NaN	NaN	1.205	NaN	1.1989	NaN	NaN	NaN	NaN	NaN	Q969P6	8	1	1	DNA topoisomerase I, mitochondrial	TOP1MT	sp|Q969P6|TOP1M_HUMAN DNA topoisomerase I, mitochondrial OS=Homo sapiens OX=9606 GN=TOP1MT PE=1 SV=1	1	8	1	1	6	5	5	5	6	5	6	5	5	5	1	0	0	0	0	0	1	0	0	0	1	0	0	0	0	0
P11387	DNA topoisomerase 1	TOP1	1.0215	1.0236	0.99305	1.0149	0.99141	1.0295	1.0559	1.0663	1.1383	1.1594	P11387	66	66	59	DNA topoisomerase 1	TOP1	sp|P11387|TOP1_HUMAN DNA topoisomerase 1 OS=Homo sapiens OX=9606 GN=TOP1 PE=1 SV=2	1	66	66	59	39	37	36	36	44	40	37	38	40	37	39	37	36	36	44	40	37	38	40	37	34	32	31	31	38	35
Q96HA7	Tonsoku-like protein	TONSL	1.004	0.66821	0.9261	0.87626	0.99333	1.0108	0.79144	0.71614	1.1445	1.0812	Q96HA7	9	9	9	Tonsoku-like protein	TONSL	sp|Q96HA7|TONSL_HUMAN Tonsoku-like protein OS=Homo sapiens OX=9606 GN=TONSL PE=1 SV=2	1	9	9	9	5	2	4	3	4	3	2	4	5	3	5	2	4	3	4	3	2	4	5	3	5	2	4	3	4	3
O94826	Mitochondrial import receptor subunit TOM70	TOMM70A	0.9802	0.96899	1.0379	0.98932	0.98636	0.96854	1.2465	1.2339	0.95557	0.97017	O94826	37	37	37	Mitochondrial import receptor subunit TOM70	TOMM70A	sp|O94826|TOM70_HUMAN Mitochondrial import receptor subunit TOM70 OS=Homo sapiens OX=9606 GN=TOMM70 PE=1 SV=1	1	37	37	37	25	25	21	22	20	24	22	23	21	22	25	25	21	22	20	24	22	23	21	22	25	25	21	22	20	24
Q9P0U1	Mitochondrial import receptor subunit TOM7 homolog	TOMM7	0.99842	1.0051	0.9919	1.036	0.98068	1.0168	1.0972	0.96952	0.88843	0.89004	Q9P0U1	3	3	3	Mitochondrial import receptor subunit TOM7 homolog	TOMM7	sp|Q9P0U1|TOM7_HUMAN Mitochondrial import receptor subunit TOM7 homolog OS=Homo sapiens OX=9606 GN=TOMM7 PE=1 SV=1	1	3	3	3	2	2	2	2	2	2	3	2	2	2	2	2	2	2	2	2	3	2	2	2	2	2	2	2	2	2
Q96B49	Mitochondrial import receptor subunit TOM6 homolog	TOMM6	1.0237	1.103	1.0589	0.95598	0.90396	1.0516	1.2738	1.0219	0.76954	0.78872	Q96B49	3	3	3	Mitochondrial import receptor subunit TOM6 homolog	TOMM6	sp|Q96B49|TOM6_HUMAN Mitochondrial import receptor subunit TOM6 homolog OS=Homo sapiens OX=9606 GN=TOMM6 PE=1 SV=1	1	3	3	3	2	2	1	2	3	3	2	1	2	2	2	2	1	2	3	3	2	1	2	2	2	2	1	2	3	3
Q8N4H5;H3BUX3	Mitochondrial import receptor subunit TOM5 homolog	TOMM5	1.0546	0.89972	0.9648	0.86213	1.0905	0.91377	0.81225	0.91043	0.83798	0.84246	Q8N4H5	5;1	5;1	5;1	Mitochondrial import receptor subunit TOM5 homolog	TOMM5	sp|Q8N4H5|TOM5_HUMAN Mitochondrial import receptor subunit TOM5 homolog OS=Homo sapiens OX=9606 GN=TOMM5 PE=1 SV=1	2	5	5	5	2	2	2	2	3	3	3	3	3	2	2	2	2	2	3	3	3	3	3	2	2	2	2	2	3	3
O96008	Mitochondrial import receptor subunit TOM40 homolog	TOMM40	1.0399	1.0774	1.099	1.2173	1.1032	1.1288	0.9617	1.0163	0.8824	0.87132	O96008	16	16	16	Mitochondrial import receptor subunit TOM40 homolog	TOMM40	sp|O96008|TOM40_HUMAN Mitochondrial import receptor subunit TOM40 homolog OS=Homo sapiens OX=9606 GN=TOMM40 PE=1 SV=1	1	16	16	16	9	9	9	9	9	12	9	9	9	10	9	9	9	9	9	12	9	9	9	10	9	9	9	9	9	12
Q15785	Mitochondrial import receptor subunit TOM34	TOMM34	0.9657	0.99855	0.90585	0.95765	0.9197	0.94529	0.8004	0.81309	1.07	1.0875	Q15785	20	20	20	Mitochondrial import receptor subunit TOM34	TOMM34	sp|Q15785|TOM34_HUMAN Mitochondrial import receptor subunit TOM34 OS=Homo sapiens OX=9606 GN=TOMM34 PE=1 SV=2	1	20	20	20	11	11	9	11	13	9	10	10	11	12	11	11	9	11	13	9	10	10	11	12	11	11	9	11	13	9
Q9NS69	Mitochondrial import receptor subunit TOM22 homolog	TOMM22	0.98964	0.9455	0.98369	0.96301	0.93155	0.97851	0.95632	0.95054	0.76768	0.86249	Q9NS69	6	6	6	Mitochondrial import receptor subunit TOM22 homolog	TOMM22	sp|Q9NS69|TOM22_HUMAN Mitochondrial import receptor subunit TOM22 homolog OS=Homo sapiens OX=9606 GN=TOMM22 PE=1 SV=3	1	6	6	6	6	6	6	6	4	4	6	6	6	6	6	6	6	6	4	4	6	6	6	6	6	6	6	6	4	4
Q15388	Mitochondrial import receptor subunit TOM20 homolog	TOMM20	0.8112	1.0437	NaN	0.95415	0.94101	0.95773	0.98717	0.9832	NaN	NaN	Q15388	3	3	3	Mitochondrial import receptor subunit TOM20 homolog	TOMM20	sp|Q15388|TOM20_HUMAN Mitochondrial import receptor subunit TOM20 homolog OS=Homo sapiens OX=9606 GN=TOMM20 PE=1 SV=1	1	3	3	3	0	1	1	1	1	1	1	1	2	1	0	1	1	1	1	1	1	1	2	1	0	1	1	1	1	1
Q6ZVM7	TOM1-like protein 2	TOM1L2	0.61809	NaN	NaN	NaN	NaN	NaN	NaN	NaN	NaN	NaN	Q6ZVM7	3	3	3	TOM1-like protein 2	TOM1L2	sp|Q6ZVM7|TM1L2_HUMAN TOM1-like protein 2 OS=Homo sapiens OX=9606 GN=TOM1L2 PE=1 SV=1	1	3	3	3	1	0	0	0	0	0	1	0	1	1	1	0	0	0	0	0	1	0	1	1	1	0	0	0	0	0
O75674	TOM1-like protein 1	TOM1L1	0.88283	1.46	1.1138	1.7731	0.88299	1.1468	1.0103	1.0323	1.0417	1.0995	O75674	8	8	8	TOM1-like protein 1	TOM1L1	sp|O75674|TM1L1_HUMAN TOM1-like protein 1 OS=Homo sapiens OX=9606 GN=TOM1L1 PE=1 SV=2	1	8	8	8	3	4	3	2	3	3	4	3	4	3	3	4	3	2	3	3	4	3	4	3	3	4	3	2	3	3
O60784	Target of Myb protein 1	TOM1	0.93641	0.99452	0.98051	1.1461	0.86012	0.6474	1.0444	1.2149	0.96378	0.89274	O60784	7	7	7	Target of Myb protein 1	TOM1	sp|O60784|TOM1_HUMAN Target of Myb protein 1 OS=Homo sapiens OX=9606 GN=TOM1 PE=1 SV=2	1	7	7	7	2	4	3	3	2	2	1	1	3	2	2	4	3	3	2	2	1	1	3	2	2	4	3	3	2	2
Q9H0E2	Toll-interacting protein	TOLLIP	2.1982	0.97003	1.0322	1.2178	2.9602	1.0098	1.1333	1.6932	0.74895	1.6861	Q9H0E2	5	5	5	Toll-interacting protein	TOLLIP	sp|Q9H0E2|TOLIP_HUMAN Toll-interacting protein OS=Homo sapiens OX=9606 GN=TOLLIP PE=1 SV=1	1	5	5	5	4	3	3	3	1	1	2	4	4	3	4	3	3	3	1	1	2	4	4	3	4	3	3	3	1	1
Q96GM8	Target of EGR1 protein 1	TOE1	0.95517	0.96425	2.4327	1.0923	1.0546	0.89034	0.91353	0.97364	0.97044	NaN	Q96GM8	7	7	7	Target of EGR1 protein 1	TOE1	sp|Q96GM8|TOE1_HUMAN Target of EGR1 protein 1 OS=Homo sapiens OX=9606 GN=TOE1 PE=1 SV=1	1	7	7	7	2	3	2	3	3	2	2	4	2	3	2	3	2	3	3	2	2	4	2	3	2	3	2	3	3	2
Q8IZW8	Tensin-4	TNS4	0.95425	0.89577	0.85169	0.83532	0.72468	0.68846	1.5798	1.424	2.4373	NaN	Q8IZW8	4	4	4	Tensin-4	TNS4	sp|Q8IZW8|TENS4_HUMAN Tensin-4 OS=Homo sapiens OX=9606 GN=TNS4 PE=1 SV=3	1	4	4	4	2	1	1	1	1	0	3	1	1	1	2	1	1	1	1	0	3	1	1	1	2	1	1	1	1	0
Q9UPQ9	Trinucleotide repeat-containing gene 6B protein	TNRC6B	0.81713	0.95471	0.90958	1.0252	0.95441	0.94737	1.0495	0.97527	0.76966	NaN	Q9UPQ9	10	10	10	Trinucleotide repeat-containing gene 6B protein	TNRC6B	sp|Q9UPQ9|TNR6B_HUMAN Trinucleotide repeat-containing gene 6B protein OS=Homo sapiens OX=9606 GN=TNRC6B PE=1 SV=4	1	10	10	10	3	4	4	4	4	4	2	2	3	5	3	4	4	4	4	4	2	2	3	5	3	4	4	4	4	4
Q8NDV7	Trinucleotide repeat-containing gene 6A protein	TNRC6A	0.93008	0.71508	0.39655	0.3185	0.49231	0.69468	0.59952	0.86723	1.0739	1.1721	Q8NDV7	9	9	8	Trinucleotide repeat-containing gene 6A protein	TNRC6A	sp|Q8NDV7|TNR6A_HUMAN Trinucleotide repeat-containing gene 6A protein OS=Homo sapiens OX=9606 GN=TNRC6A PE=1 SV=2	1	9	9	8	1	2	2	1	2	2	2	2	2	3	1	2	2	1	2	2	2	2	2	3	1	2	2	0	2	2
Q9Y5L0	Transportin-3	TNPO3	0.99126	0.98994	0.96783	0.88585	0.95201	0.93088	0.45274	0.44056	0.94071	0.92465	Q9Y5L0	26	26	26	Transportin-3	TNPO3	sp|Q9Y5L0|TNPO3_HUMAN Transportin-3 OS=Homo sapiens OX=9606 GN=TNPO3 PE=1 SV=3	1	26	26	26	7	9	11	12	12	16	12	11	14	14	7	9	11	12	12	16	12	11	14	14	7	9	11	12	12	16
O14787	Transportin-2	TNPO2	0.86289	0.94211	0.80667	0.72048	0.97059	0.7827	0.93715	1.0473	0.8086	0.82776	O14787	17	12	12	Transportin-2	TNPO2	sp|O14787|TNPO2_HUMAN Transportin-2 OS=Homo sapiens OX=9606 GN=TNPO2 PE=1 SV=3	1	17	12	12	6	7	7	9	7	7	8	8	6	7	3	5	4	6	4	3	5	5	3	4	3	5	4	6	4	3
Q92973	Transportin-1	TNPO1	1.0022	0.97104	0.97159	0.99822	0.98992	0.94364	0.89611	0.92717	0.97428	0.97092	Q92973	33	33	28	Transportin-1	TNPO1	sp|Q92973|TNPO1_HUMAN Transportin-1 OS=Homo sapiens OX=9606 GN=TNPO1 PE=1 SV=2	1	33	33	28	21	19	22	22	19	23	22	21	22	19	21	19	22	22	19	23	22	21	22	19	18	17	19	19	16	19
Q9C0C2	182 kDa tankyrase-1-binding protein	TNKS1BP1	0.97256	0.82569	0.89458	0.88017	0.97326	0.9546	1.1622	1.1624	1.096	0.9724	Q9C0C2	29	29	29	182 kDa tankyrase-1-binding protein	TNKS1BP1	sp|Q9C0C2|TB182_HUMAN 182 kDa tankyrase-1-binding protein OS=Homo sapiens OX=9606 GN=TNKS1BP1 PE=1 SV=4	1	29	29	29	10	14	5	10	14	11	7	6	6	6	10	14	5	10	14	11	7	6	6	6	10	14	5	10	14	11
Q13470	Non-receptor tyrosine-protein kinase TNK1	TNK1	0.96142	0.93225	0.96979	0.99283	0.90189	0.84094	0.92478	0.97958	NaN	0.91769	Q13470	2	2	2	Non-receptor tyrosine-protein kinase TNK1	TNK1	sp|Q13470|TNK1_HUMAN Non-receptor tyrosine-protein kinase TNK1 OS=Homo sapiens OX=9606 GN=TNK1 PE=1 SV=3	1	2	2	2	1	2	1	1	1	1	1	1	1	2	1	2	1	1	1	1	1	1	1	2	1	2	1	1	1	1
Q9UKE5	TRAF2 and NCK-interacting protein kinase	TNIK	NaN	NaN	NaN	NaN	NaN	NaN	NaN	NaN	NaN	NaN	Q9UKE5	5	1	1	TRAF2 and NCK-interacting protein kinase	TNIK	sp|Q9UKE5|TNIK_HUMAN TRAF2 and NCK-interacting protein kinase OS=Homo sapiens OX=9606 GN=TNIK PE=1 SV=1	1	5	1	1	1	2	1	1	0	1	2	3	3	1	0	0	0	0	0	1	0	0	0	0	0	0	0	0	0	1
P41273	Tumor necrosis factor ligand superfamily member 9	TNFSF9	1.6837	NaN	1.6635	NaN	1.1528	NaN	NaN	NaN	NaN	NaN	P41273	1	1	1	Tumor necrosis factor ligand superfamily member 9	TNFSF9	sp|P41273|TNFL9_HUMAN Tumor necrosis factor ligand superfamily member 9 OS=Homo sapiens OX=9606 GN=TNFSF9 PE=1 SV=1	1	1	1	1	1	0	0	0	0	0	1	0	1	0	1	0	0	0	0	0	1	0	1	0	1	0	0	0	0	0
Q9Y5U5	Tumor necrosis factor receptor superfamily member 18	TNFRSF18	1.2915	1.282	1.1145	1.0773	1.1154	1.1273	1.6768	1.3682	NaN	1.1908	Q9Y5U5	2	2	2	Tumor necrosis factor receptor superfamily member 18	TNFRSF18	sp|Q9Y5U5|TNR18_HUMAN Tumor necrosis factor receptor superfamily member 18 OS=Homo sapiens OX=9606 GN=TNFRSF18 PE=1 SV=1	1	2	2	2	1	1	1	1	0	1	2	1	1	1	1	1	1	1	0	1	2	1	1	1	1	1	1	1	0	1
Q9NP84	Tumor necrosis factor receptor superfamily member 12A	TNFRSF12A	NaN	NaN	NaN	NaN	NaN	NaN	NaN	NaN	NaN	NaN	Q9NP84	2	2	2	Tumor necrosis factor receptor superfamily member 12A	TNFRSF12A	sp|Q9NP84|TNR12_HUMAN Tumor necrosis factor receptor superfamily member 12A OS=Homo sapiens OX=9606 GN=TNFRSF12A PE=1 SV=1	1	2	2	2	0	1	0	1	0	1	0	0	0	0	0	1	0	1	0	1	0	0	0	0	0	1	0	1	0	1
O14763	Tumor necrosis factor receptor superfamily member 10B	TNFRSF10B	NaN	0.71187	NaN	0.5508	NaN	NaN	NaN	1.3174	0.47203	0.56162	O14763	3	3	3	Tumor necrosis factor receptor superfamily member 10B	TNFRSF10B	sp|O14763|TR10B_HUMAN Tumor necrosis factor receptor superfamily member 10B OS=Homo sapiens OX=9606 GN=TNFRSF10B PE=1 SV=2	1	3	3	3	1	1	0	1	1	1	0	0	0	1	1	1	0	1	1	1	0	0	0	1	1	1	0	1	1	1
O00220	Tumor necrosis factor receptor superfamily member 10A	TNFRSF10A	1.0708	1.0421	1.1119	0.99169	1.0192	0.89778	0.99222	1.0307	0.71343	0.7836	O00220	6	6	6	Tumor necrosis factor receptor superfamily member 10A	TNFRSF10A	sp|O00220|TR10A_HUMAN Tumor necrosis factor receptor superfamily member 10A OS=Homo sapiens OX=9606 GN=TNFRSF10A PE=1 SV=3	1	6	6	6	5	5	6	3	2	2	2	4	3	6	5	5	6	3	2	2	2	4	3	6	5	5	6	3	2	2
O95379	Tumor necrosis factor alpha-induced protein 8	TNFAIP8	NaN	NaN	NaN	NaN	1.1977	NaN	NaN	NaN	0.97368	1.0128	O95379	2	2	2	Tumor necrosis factor alpha-induced protein 8	TNFAIP8	sp|O95379|TFIP8_HUMAN Tumor necrosis factor alpha-induced protein 8 OS=Homo sapiens OX=9606 GN=TNFAIP8 PE=1 SV=1	1	2	2	2	0	0	0	0	1	1	1	0	0	0	0	0	0	0	1	1	1	0	0	0	0	0	0	0	1	1
Q03169	Tumor necrosis factor alpha-induced protein 2	TNFAIP2	0.82095	0.88571	0.99003	0.91335	1.0671	0.96578	1.2389	1.1967	NaN	1.657	Q03169	3	3	3	Tumor necrosis factor alpha-induced protein 2	TNFAIP2	sp|Q03169|TNAP2_HUMAN Tumor necrosis factor alpha-induced protein 2 OS=Homo sapiens OX=9606 GN=TNFAIP2 PE=2 SV=2	1	3	3	3	1	1	1	2	0	1	2	1	1	1	1	1	1	2	0	1	2	1	1	1	1	1	1	2	0	1
Q9H1E5	Thioredoxin-related transmembrane protein 4	TMX4	NaN	NaN	NaN	NaN	NaN	NaN	NaN	NaN	1.9435	NaN	Q9H1E5	1	1	1	Thioredoxin-related transmembrane protein 4	TMX4	sp|Q9H1E5|TMX4_HUMAN Thioredoxin-related transmembrane protein 4 OS=Homo sapiens OX=9606 GN=TMX4 PE=1 SV=1	1	1	1	1	0	0	0	0	1	0	0	0	0	0	0	0	0	0	1	0	0	0	0	0	0	0	0	0	1	0
Q96JJ7	Protein disulfide-isomerase TMX3	TMX3	NaN	NaN	NaN	NaN	NaN	NaN	NaN	NaN	0.66622	0.55293	Q96JJ7	3	3	3	Protein disulfide-isomerase TMX3	TMX3	sp|Q96JJ7|TMX3_HUMAN Protein disulfide-isomerase TMX3 OS=Homo sapiens OX=9606 GN=TMX3 PE=1 SV=2	1	3	3	3	0	0	0	0	2	2	0	0	0	0	0	0	0	0	2	2	0	0	0	0	0	0	0	0	2	2
Q9Y320;H3BSU7	Thioredoxin-related transmembrane protein 2	TMX2	0.9636	0.99093	0.93943	0.9499	0.98646	1.0043	0.89189	0.86111	0.83672	1.0314	Q9Y320	10;3	10;3	10;3	Thioredoxin-related transmembrane protein 2	TMX2	sp|Q9Y320|TMX2_HUMAN Thioredoxin-related transmembrane protein 2 OS=Homo sapiens OX=9606 GN=TMX2 PE=1 SV=1	2	10	10	10	6	6	8	5	4	3	5	6	7	6	6	6	8	5	4	3	5	6	7	6	6	6	8	5	4	3
Q9H3N1	Thioredoxin-related transmembrane protein 1	TMX1	1.0051	0.96041	0.95254	1.0112	0.96135	1.0372	1.0279	1.0142	0.72463	0.71702	Q9H3N1	12	12	12	Thioredoxin-related transmembrane protein 1	TMX1	sp|Q9H3N1|TMX1_HUMAN Thioredoxin-related transmembrane protein 1 OS=Homo sapiens OX=9606 GN=TMX1 PE=1 SV=1	1	12	12	12	10	11	10	10	7	8	9	11	11	12	10	11	10	10	7	8	9	11	11	12	10	11	10	10	7	8
Q9BVT8	Transmembrane and ubiquitin-like domain-containing protein 1	TMUB1	NaN	NaN	NaN	NaN	NaN	NaN	7.7785	NaN	1.0106	0.9592	Q9BVT8	3	3	3	Transmembrane and ubiquitin-like domain-containing protein 1	TMUB1	sp|Q9BVT8|TMUB1_HUMAN Transmembrane and ubiquitin-like domain-containing protein 1 OS=Homo sapiens OX=9606 GN=TMUB1 PE=1 SV=1	1	3	3	3	0	0	1	0	3	2	0	0	0	0	0	0	1	0	3	2	0	0	0	0	0	0	1	0	3	2
Q6ZXV5	Transmembrane and TPR repeat-containing protein 3	TMTC3	0.93624	0.89658	0.91471	0.95984	0.87022	1.2602	1.0527	1.0373	0.8993	0.91362	Q6ZXV5	7	7	7	Transmembrane and TPR repeat-containing protein 3	TMTC3	sp|Q6ZXV5|TMTC3_HUMAN Transmembrane and TPR repeat-containing protein 3 OS=Homo sapiens OX=9606 GN=TMTC3 PE=1 SV=2	1	7	7	7	4	5	4	3	1	4	4	3	3	4	4	5	4	3	1	4	4	3	3	4	4	5	4	3	1	4
P62328	Thymosin beta-4;Hematopoietic system regulatory peptide	TMSB4X	1.0003	1.0079	1.0977	0.97504	1.0852	1.1199	1.0872	1.0967	1.2199	1.55	P62328	6	6	5	Thymosin beta-4;Hematopoietic system regulatory peptide	TMSB4X	sp|P62328|TYB4_HUMAN Thymosin beta-4 OS=Homo sapiens OX=9606 GN=TMSB4X PE=1 SV=2	1	6	6	5	3	3	3	3	1	1	3	4	5	4	3	3	3	3	1	1	3	4	5	4	2	2	2	2	1	1
A0A087X1C1;P0CG35;P0CG34	Thymosin beta-15B;Thymosin beta-15A	TMSB15B;TMSB15A	NaN	NaN	NaN	2.5829	NaN	0.91151	NaN	NaN	NaN	NaN	A0A087X1C1;P0CG35;P0CG34	2;2;2	2;2;2	2;2;2	Thymosin beta-15B;Thymosin beta-15A	TMSB15B;TMSB15A	tr|A0A087X1C1|A0A087X1C1_HUMAN Thymosin beta-15B OS=Homo sapiens OX=9606 GN=TMSB15B PE=4 SV=1;sp|P0CG35|TB15B_HUMAN Thymosin beta-15B OS=Homo sapiens OX=9606 GN=TMSB15B PE=1 SV=1;sp|P0CG34|TB15A_HUMAN Thymosin beta-15A OS=Homo sapiens OX=9606 GN=TMSB15A PE	3	2	2	2	0	1	0	0	0	0	0	1	1	0	0	1	0	0	0	0	0	1	1	0	0	1	0	0	0	0
P63313	Thymosin beta-10	TMSB10	0.94421	0.9652	1.0655	0.91827	1.0739	1.0478	0.87153	0.98493	0.9481	0.96548	P63313	5	4	4	Thymosin beta-10	TMSB10	sp|P63313|TYB10_HUMAN Thymosin beta-10 OS=Homo sapiens OX=9606 GN=TMSB10 PE=1 SV=2	1	5	4	4	3	3	3	3	3	3	3	3	3	3	2	2	2	2	3	3	2	2	2	2	2	2	2	2	3	3
P42166	Lamina-associated polypeptide 2, isoform alpha;Thymopoietin;Thymopentin	TMPO	0.94522	1.0024	0.9724	0.96257	0.9327	0.94306	0.88159	0.8696	0.97537	0.93024	P42166	44	44	44	Lamina-associated polypeptide 2, isoform alpha;Thymopoietin;Thymopentin	TMPO	sp|P42166|LAP2A_HUMAN Lamina-associated polypeptide 2, isoform alpha OS=Homo sapiens OX=9606 GN=TMPO PE=1 SV=2	1	44	44	44	26	23	25	27	29	33	27	24	27	29	26	23	25	27	29	33	27	24	27	29	26	23	25	27	29	33
Q9NYL9;P28289	Tropomodulin-3	TMOD3	1.0328	0.97215	1.0337	0.99024	1.019	1.0295	1.1984	1.2152	0.95991	0.9714	Q9NYL9	20;1	20;1	20;1	Tropomodulin-3	TMOD3	sp|Q9NYL9|TMOD3_HUMAN Tropomodulin-3 OS=Homo sapiens OX=9606 GN=TMOD3 PE=1 SV=1	2	20	20	20	16	16	15	15	11	9	13	14	17	15	16	16	15	15	11	9	13	14	17	15	16	16	15	15	11	9
Q9NQ34	Transmembrane protein 9B	TMEM9B	NaN	NaN	0.89503	1.1367	NaN	NaN	NaN	1.0159	NaN	NaN	Q9NQ34	2	2	1	Transmembrane protein 9B	TMEM9B	sp|Q9NQ34|TMM9B_HUMAN Transmembrane protein 9B OS=Homo sapiens OX=9606 GN=TMEM9B PE=1 SV=1	1	2	2	1	1	1	0	1	0	0	0	0	0	0	1	1	0	1	0	0	0	0	0	0	1	1	0	0	0	0
Q8NBN3	Transmembrane protein 87A	TMEM87A	1.0012	1.0528	0.91462	1.0474	1.013	0.92114	1.1974	1.2206	NaN	0.83054	Q8NBN3	5	5	5	Transmembrane protein 87A	TMEM87A	sp|Q8NBN3|TM87A_HUMAN Transmembrane protein 87A OS=Homo sapiens OX=9606 GN=TMEM87A PE=1 SV=3	1	5	5	5	2	4	3	2	0	1	3	3	3	3	2	4	3	2	0	1	3	3	3	3	2	4	3	2	0	1
Q9BUB7	Transmembrane protein 70, mitochondrial	TMEM70	1.1687	1.2252	1.1296	0.90319	1.1484	1.1508	1.1133	1.7815	1.1401	1.1541	Q9BUB7	5	5	5	Transmembrane protein 70, mitochondrial	TMEM70	sp|Q9BUB7|TMM70_HUMAN Transmembrane protein 70, mitochondrial OS=Homo sapiens OX=9606 GN=TMEM70 PE=1 SV=2	1	5	5	5	3	4	3	1	4	4	3	3	4	4	3	4	3	1	4	4	3	3	4	4	3	4	3	1	4	4
Q86T03	Type 1 phosphatidylinositol 4,5-bisphosphate 4-phosphatase	TMEM55B	1.2247	1.4169	0.69387	1.9966	NaN	1.7815	0.60484	NaN	NaN	NaN	Q86T03	2	2	2	Type 1 phosphatidylinositol 4,5-bisphosphate 4-phosphatase	TMEM55B	sp|Q86T03|PP4P1_HUMAN Type 1 phosphatidylinositol 4,5-bisphosphate 4-phosphatase OS=Homo sapiens OX=9606 GN=PIP4P1 PE=1 SV=1	1	2	2	2	1	1	2	0	0	0	0	1	2	2	1	1	2	0	0	0	0	1	2	2	1	1	2	0	0	0
Q8N4L2	Type 2 phosphatidylinositol 4,5-bisphosphate 4-phosphatase	TMEM55A	0.89318	NaN	NaN	NaN	NaN	NaN	NaN	NaN	NaN	NaN	Q8N4L2	1	1	1	Type 2 phosphatidylinositol 4,5-bisphosphate 4-phosphatase	TMEM55A	sp|Q8N4L2|PP4P2_HUMAN Type 2 phosphatidylinositol 4,5-bisphosphate 4-phosphatase OS=Homo sapiens OX=9606 GN=PIP4P2 PE=1 SV=1	1	1	1	1	0	0	0	0	1	1	0	0	1	0	0	0	0	0	1	1	0	0	1	0	0	0	0	0	1	1
P56557	Transmembrane protein 50B	TMEM50B	NaN	0.89342	0.78634	NaN	NaN	NaN	NaN	NaN	NaN	NaN	P56557	1	1	1	Transmembrane protein 50B	TMEM50B	sp|P56557|TM50B_HUMAN Transmembrane protein 50B OS=Homo sapiens OX=9606 GN=TMEM50B PE=1 SV=2	1	1	1	1	1	0	0	0	0	0	0	0	0	1	1	0	0	0	0	0	0	0	0	1	1	0	0	0	0	0
O95807	Transmembrane protein 50A	TMEM50A	0.97684	0.96249	0.95581	0.84362	0.89181	1.0402	0.95293	1.0102	NaN	NaN	O95807	1	1	1	Transmembrane protein 50A	TMEM50A	sp|O95807|TM50A_HUMAN Transmembrane protein 50A OS=Homo sapiens OX=9606 GN=TMEM50A PE=1 SV=1	1	1	1	1	1	1	1	1	1	1	1	1	1	1	1	1	1	1	1	1	1	1	1	1	1	1	1	1	1	1
Q9BTV4;V9GY05	Transmembrane protein 43	TMEM43	0.94055	1.0681	1.041	1.0432	1.0947	0.98759	1.3188	1.3112	0.98259	0.94283	Q9BTV4	16;2	16;2	16;2	Transmembrane protein 43	TMEM43	sp|Q9BTV4|TMM43_HUMAN Transmembrane protein 43 OS=Homo sapiens OX=9606 GN=TMEM43 PE=1 SV=1	2	16	16	16	11	10	8	11	8	6	12	10	8	9	11	10	8	11	8	6	12	10	8	9	11	10	8	11	8	6
Q5BJD5	Transmembrane protein 41B	TMEM41B	0.97556	1.0173	1.0616	1.0662	0.15098	1.1157	1.3317	1.0617	NaN	NaN	Q5BJD5	1	1	1	Transmembrane protein 41B	TMEM41B	sp|Q5BJD5|TM41B_HUMAN Transmembrane protein 41B OS=Homo sapiens OX=9606 GN=TMEM41B PE=1 SV=1	1	1	1	1	1	1	1	1	1	1	1	1	1	1	1	1	1	1	1	1	1	1	1	1	1	1	1	1	1	1
Q96HV5	Transmembrane protein 41A	TMEM41A	1.5618	2.2089	1.8408	1.8546	2.0309	0.9493	1.9957	1.8437	1.195	NaN	Q96HV5	2	2	2	Transmembrane protein 41A	TMEM41A	sp|Q96HV5|TM41A_HUMAN Transmembrane protein 41A OS=Homo sapiens OX=9606 GN=TMEM41A PE=1 SV=1	1	2	2	2	2	2	2	2	1	0	2	1	2	2	2	2	2	2	1	0	2	1	2	2	2	2	2	2	1	0
Q9NVV0	Trimeric intracellular cation channel type B	TMEM38B	0.88246	NaN	0.78637	0.78207	0.80089	0.73211	0.83958	0.92214	NaN	1.3562	Q9NVV0	3	3	3	Trimeric intracellular cation channel type B	TMEM38B	sp|Q9NVV0|TM38B_HUMAN Trimeric intracellular cation channel type B OS=Homo sapiens OX=9606 GN=TMEM38B PE=1 SV=1	1	3	3	3	1	1	1	2	1	2	1	1	1	0	1	1	1	2	1	2	1	1	1	0	1	1	1	2	1	2
P57088	Transmembrane protein 33	TMEM33	1.0931	1.0193	1.0357	1.0997	1.0172	1.0468	1.032	1.0048	1.1124	1.0706	P57088	12	12	12	Transmembrane protein 33	TMEM33	sp|P57088|TMM33_HUMAN Transmembrane protein 33 OS=Homo sapiens OX=9606 GN=TMEM33 PE=1 SV=2	1	12	12	12	9	8	10	8	6	5	8	10	8	8	9	8	10	8	6	5	8	10	8	8	9	8	10	8	6	5
Q9NV96;Q3MIR4	Cell cycle control protein 50A	TMEM30A	1.0619	1.645	0.66712	1.4041	0.60156	NaN	NaN	1.6016	0.90016	0.97036	Q9NV96	6;1	6;1	6;1	Cell cycle control protein 50A	TMEM30A	sp|Q9NV96|CC50A_HUMAN Cell cycle control protein 50A OS=Homo sapiens OX=9606 GN=TMEM30A PE=1 SV=1	2	6	6	6	1	2	1	1	3	2	2	0	1	1	1	2	1	1	3	2	2	0	1	1	1	2	1	1	3	2
Q8WUH6	Transmembrane protein 263	TMEM263	1.018	1.3956	1.2122	1.0368	1.2054	1.4622	1.7224	1.6136	0.819	1.0243	Q8WUH6	4	4	4	Transmembrane protein 263	TMEM263	sp|Q8WUH6|TM263_HUMAN Transmembrane protein 263 OS=Homo sapiens OX=9606 GN=TMEM263 PE=1 SV=1	1	4	4	4	3	3	3	2	2	2	3	2	3	2	3	3	3	2	2	2	3	2	3	2	3	3	3	2	2	2
Q96GE9	Transmembrane protein 261	TMEM261	0.90943	0.94369	0.79128	1.2542	0.81371	0.88551	1.0526	0.97977	2.6846	2.609	Q96GE9	1	1	1	Transmembrane protein 261	TMEM261	sp|Q96GE9|DMAC1_HUMAN Distal membrane-arm assembly complex protein 1 OS=Homo sapiens OX=9606 GN=DMAC1 PE=1 SV=1	1	1	1	1	1	1	1	1	1	1	1	1	1	1	1	1	1	1	1	1	1	1	1	1	1	1	1	1	1	1
Q4ZIN3	Membralin	TMEM259	NaN	NaN	NaN	1.0769	NaN	NaN	1.1398	1.531	NaN	NaN	Q4ZIN3	3	3	3	Membralin	TMEM259	sp|Q4ZIN3|MBRL_HUMAN Membralin OS=Homo sapiens OX=9606 GN=TMEM259 PE=1 SV=1	1	3	3	3	0	1	1	2	1	0	0	0	0	0	0	1	1	2	1	0	0	0	0	0	0	1	1	2	1	0
P61165	Transmembrane protein 258	TMEM258	1.0149	0.96233	0.97818	1.0073	1.0014	0.96764	1.0243	1.0864	0.94463	0.93798	P61165	2	2	2	Transmembrane protein 258	TMEM258	sp|P61165|TM258_HUMAN Transmembrane protein 258 OS=Homo sapiens OX=9606 GN=TMEM258 PE=1 SV=1	1	2	2	2	1	1	1	1	2	1	1	1	1	1	1	1	1	1	2	1	1	1	1	1	1	1	1	1	2	1
K7ERE1;Q8N2U0	Transmembrane protein 256	TMEM256	0.89402	1.0374	1.0231	1.0057	0.90902	1.1458	1.0185	1.2625	0.75441	0.60336	K7ERE1;Q8N2U0	3;3	3;3	3;3	Transmembrane protein 256	TMEM256	tr|K7ERE1|K7ERE1_HUMAN TMEM256-PLSCR3 readthrough (NMD candidate) OS=Homo sapiens OX=9606 GN=TMEM256-PLSCR3 PE=4 SV=1;sp|Q8N2U0|TM256_HUMAN Transmembrane protein 256 OS=Homo sapiens OX=9606 GN=TMEM256 PE=3 SV=1	2	3	3	3	2	2	1	2	2	1	1	1	2	2	2	2	1	2	2	1	1	1	2	2	2	2	1	2	2	1
Q9H330	Transmembrane protein 245	TMEM245	0.93352	NaN	0.85989	1.1084	NaN	NaN	0.96498	0.85552	NaN	NaN	Q9H330	3	3	3	Transmembrane protein 245	TMEM245	sp|Q9H330|TM245_HUMAN Transmembrane protein 245 OS=Homo sapiens OX=9606 GN=TMEM245 PE=1 SV=3	1	3	3	3	2	1	1	1	0	0	0	0	2	0	2	1	1	1	0	0	0	0	2	0	2	1	1	1	0	0
Q96A57	Transmembrane protein 230	TMEM230	1.1407	1.1582	1.0226	1.0908	1.1549	1.1382	1.1507	1.1243	1.0504	1.1472	Q96A57	3	3	3	Transmembrane protein 230	TMEM230	sp|Q96A57|TM230_HUMAN Transmembrane protein 230 OS=Homo sapiens OX=9606 GN=TMEM230 PE=1 SV=1	1	3	3	3	2	2	2	1	2	1	1	2	2	2	2	2	2	1	2	1	1	2	2	2	2	2	2	1	2	1
Q6NUQ4	Transmembrane protein 214	TMEM214	1.1418	0.97396	0.97677	1.024	1.0685	1.1074	0.92763	1.0759	1.0338	1.0646	Q6NUQ4	19	19	19	Transmembrane protein 214	TMEM214	sp|Q6NUQ4|TM214_HUMAN Transmembrane protein 214 OS=Homo sapiens OX=9606 GN=TMEM214 PE=1 SV=2	1	19	19	19	11	9	8	7	5	5	8	7	9	8	11	9	8	7	5	5	8	7	9	8	11	9	8	7	5	5
Q96SK2	Transmembrane protein 209	TMEM209	1.6819	0.89759	0.9395	0.87302	0.9194	0.9645	0.89912	0.95589	1.0783	0.99296	Q96SK2	9	9	9	Transmembrane protein 209	TMEM209	sp|Q96SK2|TM209_HUMAN Transmembrane protein 209 OS=Homo sapiens OX=9606 GN=TMEM209 PE=1 SV=2	1	9	9	9	3	5	4	3	4	4	3	3	3	4	3	5	4	3	4	4	3	3	3	4	3	5	4	3	4	4
Q6UW68	Transmembrane protein 205	TMEM205	1.5181	0.88832	0.64349	1.1885	2.0704	1.4389	1.1541	1.8644	0.49708	0.52753	Q6UW68	4	4	4	Transmembrane protein 205	TMEM205	sp|Q6UW68|TM205_HUMAN Transmembrane protein 205 OS=Homo sapiens OX=9606 GN=TMEM205 PE=1 SV=1	1	4	4	4	2	2	1	2	3	1	2	2	2	2	2	2	1	2	3	1	2	2	2	2	2	2	1	2	3	1
Q5SNT2	Transmembrane protein 201	TMEM201	0.95551	1.0071	1.0208	0.96975	1.0681	0.99964	0.86134	0.90505	1.0253	1.0159	Q5SNT2	7	7	7	Transmembrane protein 201	TMEM201	sp|Q5SNT2|TM201_HUMAN Transmembrane protein 201 OS=Homo sapiens OX=9606 GN=TMEM201 PE=1 SV=1	1	7	7	7	3	3	3	2	3	2	3	2	3	3	3	3	3	2	3	2	3	2	3	3	3	3	3	2	3	2
Q9UHN6	Transmembrane protein 2	TMEM2	0.96188	1.0981	0.91693	0.80407	0.90585	1.2169	0.74719	0.79173	NaN	NaN	Q9UHN6	3	3	3	Transmembrane protein 2	TMEM2	sp|Q9UHN6|CEIP2_HUMAN Cell surface hyaluronidase OS=Homo sapiens OX=9606 GN=CEMIP2 PE=1 SV=1	1	3	3	3	1	1	1	2	0	1	1	1	1	2	1	1	1	2	0	1	1	1	1	2	1	1	1	2	0	1
Q8N511	Transmembrane protein 199	TMEM199	NaN	0.90329	NaN	0.8632	NaN	NaN	NaN	0.89303	0.74864	0.9508	Q8N511	2	2	2	Transmembrane protein 199	TMEM199	sp|Q8N511|TM199_HUMAN Transmembrane protein 199 OS=Homo sapiens OX=9606 GN=TMEM199 PE=1 SV=1	1	2	2	2	0	1	0	2	1	1	0	0	0	1	0	1	0	2	1	1	0	0	0	1	0	1	0	2	1	1
Q8IY95	Transmembrane protein 192	TMEM192	NaN	NaN	NaN	0.98616	0.85801	2.9042	NaN	NaN	0.7189	0.66115	Q8IY95	4	4	4	Transmembrane protein 192	TMEM192	sp|Q8IY95|TM192_HUMAN Transmembrane protein 192 OS=Homo sapiens OX=9606 GN=TMEM192 PE=1 SV=1	1	4	4	4	0	1	0	0	2	2	1	1	0	0	0	1	0	0	2	2	1	1	0	0	0	1	0	0	2	2
Q9NVA4	Transmembrane protein 184C	TMEM184C	0.79988	NaN	NaN	NaN	NaN	NaN	NaN	0.71518	NaN	NaN	Q9NVA4	1	1	1	Transmembrane protein 184C	TMEM184C	sp|Q9NVA4|T184C_HUMAN Transmembrane protein 184C OS=Homo sapiens OX=9606 GN=TMEM184C PE=1 SV=2	1	1	1	1	0	0	0	1	0	0	0	0	1	0	0	0	0	1	0	0	0	0	1	0	0	0	0	1	0	0
Q9Y519	Transmembrane protein 184B	TMEM184B	1.7609	0.71065	1.0994	NaN	NaN	NaN	0.8988	NaN	NaN	NaN	Q9Y519	1	1	1	Transmembrane protein 184B	TMEM184B	sp|Q9Y519|T184B_HUMAN Transmembrane protein 184B OS=Homo sapiens OX=9606 GN=TMEM184B PE=1 SV=2	1	1	1	1	1	0	1	0	0	0	0	0	1	1	1	0	1	0	0	0	0	0	1	1	1	0	1	0	0	0
Q7Z7N9	Transmembrane protein 179B	TMEM179B	NaN	NaN	NaN	0.64677	NaN	NaN	0.91038	1.1426	NaN	NaN	Q7Z7N9	1	1	1	Transmembrane protein 179B	TMEM179B	sp|Q7Z7N9|T179B_HUMAN Transmembrane protein 179B OS=Homo sapiens OX=9606 GN=TMEM179B PE=1 SV=1	1	1	1	1	1	1	1	1	0	0	0	0	0	0	1	1	1	1	0	0	0	0	0	0	1	1	1	1	0	0
Q86WV6	Stimulator of interferon genes protein	TMEM173	NaN	NaN	0.82889	0.90774	NaN	1.1025	1.1545	1.2309	NaN	NaN	Q86WV6	2	2	2	Stimulator of interferon genes protein	TMEM173	sp|Q86WV6|STING_HUMAN Stimulator of interferon genes protein OS=Homo sapiens OX=9606 GN=TMEM173 PE=1 SV=1	1	2	2	2	1	2	1	1	0	1	0	1	0	0	1	2	1	1	0	1	0	1	0	0	1	2	1	1	0	1
Q8TBQ9	Protein kish-A	TMEM167A	0.98051	NaN	2.4765	NaN	NaN	NaN	NaN	1.4492	NaN	NaN	Q8TBQ9	2	2	2	Protein kish-A	TMEM167A	sp|Q8TBQ9|KISHA_HUMAN Protein kish-A OS=Homo sapiens OX=9606 GN=TMEM167A PE=1 SV=1	1	2	2	2	2	0	0	2	0	0	1	0	1	0	2	0	0	2	0	0	1	0	1	0	2	0	0	2	0	0
Q9HC07	Transmembrane protein 165	TMEM165	0.99786	0.93237	0.88644	0.88737	1.0335	1.064	1.4191	1.3227	1.2268	1.1856	Q9HC07	6	6	6	Transmembrane protein 165	TMEM165	sp|Q9HC07|TM165_HUMAN Transmembrane protein 165 OS=Homo sapiens OX=9606 GN=TMEM165 PE=1 SV=1	1	6	6	6	4	4	4	3	4	5	3	4	4	4	4	4	4	3	4	5	3	4	4	4	4	4	4	3	4	5
Q9NX61	Transmembrane protein 161A	TMEM161A	0.79041	0.94798	NaN	NaN	NaN	1.1304	0.70029	NaN	NaN	NaN	Q9NX61	2	2	2	Transmembrane protein 161A	TMEM161A	sp|Q9NX61|T161A_HUMAN Transmembrane protein 161A OS=Homo sapiens OX=9606 GN=TMEM161A PE=1 SV=1	1	2	2	2	0	0	1	0	0	0	0	1	1	1	0	0	1	0	0	0	0	1	1	1	0	0	1	0	0	0
Q24JP5	Transmembrane protein 132A	TMEM132A	NaN	0.89093	1.0976	0.84361	0.93854	1.1916	2.6393	1.2219	NaN	NaN	Q24JP5	1	1	1	Transmembrane protein 132A	TMEM132A	sp|Q24JP5|T132A_HUMAN Transmembrane protein 132A OS=Homo sapiens OX=9606 GN=TMEM132A PE=1 SV=1	1	1	1	1	1	1	1	1	0	0	1	1	0	1	1	1	1	1	0	0	1	1	0	1	1	1	1	1	0	0
Q92545	Transmembrane protein 131	TMEM131	NaN	NaN	0.94925	NaN	0.53918	NaN	1.1583	1.2673	1.1945	NaN	Q92545	4	4	4	Transmembrane protein 131	TMEM131	sp|Q92545|TM131_HUMAN Transmembrane protein 131 OS=Homo sapiens OX=9606 GN=TMEM131 PE=1 SV=3	1	4	4	4	1	0	1	2	1	0	2	0	0	0	1	0	1	2	1	0	2	0	0	0	1	0	1	2	1	0
Q8IUX1	Complex I assembly factor TMEM126B, mitochondrial	TMEM126B	1.4589	1.5269	NaN	1.2526	1.8685	NaN	1.6312	NaN	NaN	0.24186	Q8IUX1	2	2	2	Complex I assembly factor TMEM126B, mitochondrial	TMEM126B	sp|Q8IUX1|T126B_HUMAN Complex I assembly factor TMEM126B, mitochondrial OS=Homo sapiens OX=9606 GN=TMEM126B PE=1 SV=2	1	2	2	2	0	1	1	0	0	1	1	0	2	1	0	1	1	0	0	1	1	0	2	1	0	1	1	0	0	1
Q9H061	Transmembrane protein 126A	TMEM126A	1.0092	0.71417	0.62208	0.86293	0.83043	1.0031	0.47628	0.82464	NaN	NaN	Q9H061	4	4	4	Transmembrane protein 126A	TMEM126A	sp|Q9H061|T126A_HUMAN Transmembrane protein 126A OS=Homo sapiens OX=9606 GN=TMEM126A PE=1 SV=1	1	4	4	4	2	3	2	3	0	1	2	2	2	2	2	3	2	3	0	1	2	2	2	2	2	3	2	3	0	1
Q8N131	Porimin	TMEM123	NaN	NaN	NaN	NaN	NaN	NaN	NaN	NaN	NaN	NaN	Q8N131	1	1	1	Porimin	TMEM123	sp|Q8N131|PORIM_HUMAN Porimin OS=Homo sapiens OX=9606 GN=TMEM123 PE=1 SV=1	1	1	1	1	1	1	1	1	0	0	1	1	1	1	1	1	1	1	0	0	1	1	1	1	1	1	1	1	0	0
P17152	Transmembrane protein 11, mitochondrial	TMEM11	0.80914	0.78956	1.0593	0.84444	0.82194	0.83101	0.33636	0.44325	0.70513	0.86271	P17152	2	2	2	Transmembrane protein 11, mitochondrial	TMEM11	sp|P17152|TMM11_HUMAN Transmembrane protein 11, mitochondrial OS=Homo sapiens OX=9606 GN=TMEM11 PE=1 SV=1	1	2	2	2	1	1	1	1	1	1	1	1	1	1	1	1	1	1	1	1	1	1	1	1	1	1	1	1	1	1
Q9BVC6	Transmembrane protein 109	TMEM109	NaN	NaN	1.4585	1.2635	1.0894	NaN	1.013	1.0008	1.0541	1.0553	Q9BVC6	4	4	4	Transmembrane protein 109	TMEM109	sp|Q9BVC6|TM109_HUMAN Transmembrane protein 109 OS=Homo sapiens OX=9606 GN=TMEM109 PE=1 SV=1	1	4	4	4	1	1	3	1	2	2	1	0	0	0	1	1	3	1	2	2	1	0	0	0	1	1	3	1	2	2
Q9NUM4	Transmembrane protein 106B	TMEM106B	1.0042	1.2265	1.4448	1.2054	NaN	1.199	1.7047	1.5738	NaN	NaN	Q9NUM4	1	1	1	Transmembrane protein 106B	TMEM106B	sp|Q9NUM4|T106B_HUMAN Transmembrane protein 106B OS=Homo sapiens OX=9606 GN=TMEM106B PE=1 SV=2	1	1	1	1	1	1	1	1	0	0	0	1	1	1	1	1	1	1	0	0	0	1	1	1	1	1	1	1	0	0
Q9BVK6	Transmembrane emp24 domain-containing protein 9	TMED9	1.0374	0.9936	0.95951	0.95234	1.0778	0.98188	1.1217	1.0875	0.84771	0.86821	Q9BVK6	15	15	14	Transmembrane emp24 domain-containing protein 9	TMED9	sp|Q9BVK6|TMED9_HUMAN Transmembrane emp24 domain-containing protein 9 OS=Homo sapiens OX=9606 GN=TMED9 PE=1 SV=2	1	15	15	14	7	6	7	7	8	10	7	7	7	7	7	6	7	7	8	10	7	7	7	7	6	5	6	6	7	9
Q6PL24	Protein TMED8	TMED8	0.51891	0.62	0.76886	NaN	0.70107	NaN	0.63044	0.44297	NaN	NaN	Q6PL24	3	3	3	Protein TMED8	TMED8	sp|Q6PL24|TMED8_HUMAN Protein TMED8 OS=Homo sapiens OX=9606 GN=TMED8 PE=1 SV=1	1	3	3	3	2	0	1	1	0	0	1	0	2	3	2	0	1	1	0	0	1	0	2	3	2	0	1	1	0	0
Q9Y3B3;A0A0A6YYA0	Transmembrane emp24 domain-containing protein 7	TMED7;TMED7-TICAM2	1.4412	1.1464	0.91446	1.2556	1.0471	1.0455	1.0098	1.2388	0.87328	0.85614	Q9Y3B3;A0A0A6YYA0	6;5	6;5	6;5	Transmembrane emp24 domain-containing protein 7	TMED7;TMED7-TICAM2	sp|Q9Y3B3|TMED7_HUMAN Transmembrane emp24 domain-containing protein 7 OS=Homo sapiens OX=9606 GN=TMED7 PE=1 SV=2;tr|A0A0A6YYA0|A0A0A6YYA0_HUMAN Protein TMED7-TICAM2 OS=Homo sapiens OX=9606 GN=TMED7-TICAM2 PE=3 SV=1	2	6	6	6	3	3	3	3	3	3	3	4	5	4	3	3	3	3	3	3	3	4	5	4	3	3	3	3	3	3
Q9Y3A6	Transmembrane emp24 domain-containing protein 5	TMED5	0.93465	1.0318	0.94417	0.98587	0.97499	0.9508	1.497	1.4393	1.3075	1.2396	Q9Y3A6	3	3	3	Transmembrane emp24 domain-containing protein 5	TMED5	sp|Q9Y3A6|TMED5_HUMAN Transmembrane emp24 domain-containing protein 5 OS=Homo sapiens OX=9606 GN=TMED5 PE=1 SV=1	1	3	3	3	2	2	2	2	1	1	2	2	2	1	2	2	2	2	1	1	2	2	2	1	2	2	2	2	1	1
Q7Z7H5	Transmembrane emp24 domain-containing protein 4	TMED4	0.77773	1.2226	0.91981	1.102	1.1624	1.1486	0.93494	1.1763	0.99234	1.1464	Q7Z7H5	9	8	8	Transmembrane emp24 domain-containing protein 4	TMED4	sp|Q7Z7H5|TMED4_HUMAN Transmembrane emp24 domain-containing protein 4 OS=Homo sapiens OX=9606 GN=TMED4 PE=1 SV=1	1	9	8	8	6	5	4	5	4	5	6	4	3	4	5	4	3	4	3	4	5	3	2	3	5	4	3	4	3	4
Q15363	Transmembrane emp24 domain-containing protein 2	TMED2	1.0266	1.1175	1.0491	1.0963	1.0963	1.0994	1.1178	1.1487	1.1322	0.93569	Q15363	6	6	6	Transmembrane emp24 domain-containing protein 2	TMED2	sp|Q15363|TMED2_HUMAN Transmembrane emp24 domain-containing protein 2 OS=Homo sapiens OX=9606 GN=TMED2 PE=1 SV=1	1	6	6	6	4	4	4	3	3	3	4	4	4	4	4	4	4	3	3	3	4	4	4	4	4	4	4	3	3	3
P49755	Transmembrane emp24 domain-containing protein 10	TMED10	0.99178	1.0687	1.0231	1.0104	1.0153	1.0481	1.1683	1.1971	0.93841	0.94071	P49755	11	11	11	Transmembrane emp24 domain-containing protein 10	TMED10	sp|P49755|TMEDA_HUMAN Transmembrane emp24 domain-containing protein 10 OS=Homo sapiens OX=9606 GN=TMED10 PE=1 SV=2	1	11	11	11	6	5	6	3	8	6	5	7	6	5	6	5	6	3	8	6	5	7	6	5	6	5	6	3	8	6
Q13445	Transmembrane emp24 domain-containing protein 1	TMED1	1.7689	NaN	0.50075	1.4416	NaN	NaN	NaN	NaN	0.69097	0.89802	Q13445	5	5	5	Transmembrane emp24 domain-containing protein 1	TMED1	sp|Q13445|TMED1_HUMAN Transmembrane emp24 domain-containing protein 1 OS=Homo sapiens OX=9606 GN=TMED1 PE=1 SV=1	1	5	5	5	1	2	1	1	2	1	1	0	2	0	1	2	1	1	2	1	1	0	2	0	1	2	1	1	2	1
Q9UM00	Transmembrane and coiled-coil domain-containing protein 1	TMCO1	0.96883	0.74025	1.1666	0.78185	1.1097	1.6452	1.0209	0.78144	0.9818	0.95245	Q9UM00	4	4	4	Transmembrane and coiled-coil domain-containing protein 1	TMCO1	sp|Q9UM00|TMCO1_HUMAN Calcium load-activated calcium channel OS=Homo sapiens OX=9606 GN=TMCO1 PE=1 SV=1	1	4	4	4	3	3	3	3	2	2	4	4	3	2	3	3	3	3	2	2	4	4	3	2	3	3	3	3	2	2
P55061	Bax inhibitor 1	TMBIM6	0.61855	0.63983	0.60344	0.62704	0.66657	0.28488	1.5581	1.5597	1.029	0.86121	P55061	3	3	3	Bax inhibitor 1	TMBIM6	sp|P55061|BI1_HUMAN Bax inhibitor 1 OS=Homo sapiens OX=9606 GN=TMBIM6 PE=1 SV=2	1	3	3	3	1	2	2	2	3	3	1	1	1	1	1	2	2	2	3	3	1	1	1	1	1	2	2	2	3	3
Q969X1	Protein lifeguard 3	TMBIM1	1.2663	1.0573	1.0998	0.96577	1.0414	1.2465	1.4034	1.5484	1.0892	NaN	Q969X1	2	2	2	Protein lifeguard 3	TMBIM1	sp|Q969X1|LFG3_HUMAN Protein lifeguard 3 OS=Homo sapiens OX=9606 GN=TMBIM1 PE=1 SV=2	1	2	2	2	1	1	1	1	1	1	1	1	1	1	1	1	1	1	1	1	1	1	1	1	1	1	1	1	1	1
Q9Y2S6;A0A024R1R8	Translation machinery-associated protein 7	TMA7	0.94473	0.9351	0.99445	0.93305	0.88536	0.92075	0.92026	1.0094	1.4639	1.5124	Q9Y2S6	5;2	5;2	4;2	Translation machinery-associated protein 7	TMA7	sp|Q9Y2S6|TMA7_HUMAN Translation machinery-associated protein 7 OS=Homo sapiens OX=9606 GN=TMA7 PE=1 SV=1	2	5	5	4	2	2	2	2	4	3	1	1	2	2	2	2	2	2	4	3	1	1	2	2	2	2	2	2	3	3
Q96EY4	Translation machinery-associated protein 16	TMA16	0.97358	0.96196	0.99002	0.98614	0.99346	1.0212	0.98172	0.9821	1.19	1.2531	Q96EY4	7	7	7	Translation machinery-associated protein 16	TMA16	sp|Q96EY4|TMA16_HUMAN Translation machinery-associated protein 16 OS=Homo sapiens OX=9606 GN=TMA16 PE=1 SV=2	1	7	7	7	6	6	6	6	4	3	5	6	6	6	6	6	6	6	4	3	5	6	6	6	6	6	6	6	4	3
Q92544	Transmembrane 9 superfamily member 4	TM9SF4	0.99638	1.0992	0.99629	1.1022	1.1622	1.2104	0.84097	0.93946	NaN	1.2758	Q92544	8	8	8	Transmembrane 9 superfamily member 4	TM9SF4	sp|Q92544|TM9S4_HUMAN Transmembrane 9 superfamily member 4 OS=Homo sapiens OX=9606 GN=TM9SF4 PE=1 SV=2	1	8	8	8	6	4	7	6	0	3	4	3	7	5	6	4	7	6	0	3	4	3	7	5	6	4	7	6	0	3
Q9HD45	Transmembrane 9 superfamily member 3	TM9SF3	1.0217	0.95308	1.0953	0.93563	0.9275	1.149	1.0785	1.0662	0.68767	0.70491	Q9HD45	9	9	9	Transmembrane 9 superfamily member 3	TM9SF3	sp|Q9HD45|TM9S3_HUMAN Transmembrane 9 superfamily member 3 OS=Homo sapiens OX=9606 GN=TM9SF3 PE=1 SV=2	1	9	9	9	5	4	4	4	5	5	4	4	5	5	5	4	4	4	5	5	4	4	5	5	5	4	4	4	5	5
Q99805	Transmembrane 9 superfamily member 2	TM9SF2	1.0039	1.0612	1.0212	1.0287	1.0552	1.0028	1.0103	1.1026	0.97635	1.1892	Q99805	13	13	13	Transmembrane 9 superfamily member 2	TM9SF2	sp|Q99805|TM9S2_HUMAN Transmembrane 9 superfamily member 2 OS=Homo sapiens OX=9606 GN=TM9SF2 PE=1 SV=1	1	13	13	13	12	11	11	10	5	3	10	11	10	11	12	11	11	10	5	3	10	11	10	11	12	11	11	10	5	3
Q9Y490;Q9Y4G6	Talin-1	TLN1	0.98584	0.99088	0.97673	0.97987	0.9659	0.99118	1.1917	1.2146	1.2509	1.2444	Q9Y490	120;12	120;12	120;12	Talin-1	TLN1	sp|Q9Y490|TLN1_HUMAN Talin-1 OS=Homo sapiens OX=9606 GN=TLN1 PE=1 SV=3	2	120	120	120	77	78	75	76	66	67	76	71	70	73	77	78	75	76	66	67	76	71	70	73	77	78	75	76	66	67
Q86UE8	Serine/threonine-protein kinase tousled-like 2	TLK2	0.78723	0.7577	0.85361	0.97572	1.0347	0.84396	1.1154	1.0647	1.0857	1.1004	Q86UE8	7	7	5	Serine/threonine-protein kinase tousled-like 2	TLK2	sp|Q86UE8|TLK2_HUMAN Serine/threonine-protein kinase tousled-like 2 OS=Homo sapiens OX=9606 GN=TLK2 PE=1 SV=2	1	7	7	5	2	1	3	1	4	1	2	3	1	2	2	1	3	1	4	1	2	3	1	2	2	1	2	1	3	1
Q9UKI8	Serine/threonine-protein kinase tousled-like 1	TLK1	0.80358	0.85869	0.68943	0.80179	0.73461	1.4049	0.88809	1.1266	NaN	NaN	Q9UKI8	5	3	3	Serine/threonine-protein kinase tousled-like 1	TLK1	sp|Q9UKI8|TLK1_HUMAN Serine/threonine-protein kinase tousled-like 1 OS=Homo sapiens OX=9606 GN=TLK1 PE=1 SV=2	1	5	3	3	1	1	2	1	2	0	1	2	2	1	1	1	1	1	1	0	1	1	2	1	1	1	1	1	1	0
Q04726	Transducin-like enhancer protein 3	TLE3	NaN	NaN	NaN	NaN	1.3437	0.76709	NaN	0.90546	1.0894	NaN	Q04726	2	2	2	Transducin-like enhancer protein 3	TLE3	sp|Q04726|TLE3_HUMAN Transducin-like enhancer protein 3 OS=Homo sapiens OX=9606 GN=TLE3 PE=1 SV=2	1	2	2	2	0	1	1	1	1	1	1	1	1	1	0	1	1	1	1	1	1	1	1	1	0	1	1	1	1	1
P29401	Transketolase	TKT	1.037	1.0498	1.0142	1.0192	1.0491	1.0007	1.2355	1.2152	0.98184	1.0044	P29401	44	44	44	Transketolase	TKT	sp|P29401|TKT_HUMAN Transketolase OS=Homo sapiens OX=9606 GN=TKT PE=1 SV=3	1	44	44	44	31	31	31	31	37	38	30	31	31	31	31	31	31	31	37	38	30	31	31	31	31	31	31	31	37	38
O00142	Thymidine kinase 2, mitochondrial	TK2	0.97935	1.0903	1.0141	1.0691	1.0635	1.1824	0.95516	1.1452	NaN	NaN	O00142	3	3	3	Thymidine kinase 2, mitochondrial	TK2	sp|O00142|KITM_HUMAN Thymidine kinase 2, mitochondrial OS=Homo sapiens OX=9606 GN=TK2 PE=1 SV=4	1	3	3	3	2	2	2	2	1	0	2	2	2	2	2	2	2	2	1	0	2	2	2	2	2	2	2	2	1	0
P04183	Thymidine kinase, cytosolic	TK1	0.99039	1.0311	1.0148	1.0278	0.9931	1.0398	0.94987	0.93617	1.4927	1.7301	P04183	13	13	13	Thymidine kinase, cytosolic	TK1	sp|P04183|KITH_HUMAN Thymidine kinase, cytosolic OS=Homo sapiens OX=9606 GN=TK1 PE=1 SV=2	1	13	13	13	8	8	7	7	6	2	8	10	9	8	8	8	7	7	6	2	8	10	9	8	8	8	7	7	6	2
O95049	Tight junction protein ZO-3	TJP3	NaN	NaN	1.1099	1.1852	NaN	NaN	2.8905	2.3133	0.80212	NaN	O95049	4	4	4	Tight junction protein ZO-3	TJP3	sp|O95049|ZO3_HUMAN Tight junction protein ZO-3 OS=Homo sapiens OX=9606 GN=TJP3 PE=1 SV=3	1	4	4	4	2	4	1	1	1	1	0	0	0	0	2	4	1	1	1	1	0	0	0	0	2	4	1	1	1	1
A0A2R8YDH4;Q9UDY2	Tight junction protein ZO-2	TJP2	0.98191	1.0642	1.0137	0.98102	1.0562	0.97227	1.3282	1.2733	1.4027	1.1653	A0A2R8YDH4;Q9UDY2	24;24	24;24	24;24	Tight junction protein ZO-2	TJP2	tr|A0A2R8YDH4|A0A2R8YDH4_HUMAN Tight junction protein ZO-2 OS=Homo sapiens OX=9606 GN=TJP2 PE=3 SV=1;sp|Q9UDY2|ZO2_HUMAN Tight junction protein ZO-2 OS=Homo sapiens OX=9606 GN=TJP2 PE=1 SV=2	2	24	24	24	14	14	10	8	4	6	11	10	8	8	14	14	10	8	4	6	11	10	8	8	14	14	10	8	4	6
Q07157	Tight junction protein ZO-1	TJP1	0.95223	0.93703	0.97012	0.93597	0.94844	0.95628	1.1315	1.1154	0.90106	0.90574	Q07157	59	59	59	Tight junction protein ZO-1	TJP1	sp|Q07157|ZO1_HUMAN Tight junction protein ZO-1 OS=Homo sapiens OX=9606 GN=TJP1 PE=1 SV=3	1	59	59	59	47	39	40	43	16	12	43	40	40	41	47	39	40	43	16	12	43	40	40	41	47	39	40	43	16	12
O75663	TIP41-like protein	TIPRL	0.98323	0.97971	1.0018	0.92651	0.97488	0.97392	1.2162	1.2676	0.99627	0.92504	O75663	12	12	12	TIP41-like protein	TIPRL	sp|O75663|TIPRL_HUMAN TIP41-like protein OS=Homo sapiens OX=9606 GN=TIPRL PE=1 SV=2	1	12	12	12	10	9	10	10	3	4	8	7	11	9	10	9	10	10	3	4	8	7	11	9	10	9	10	10	3	4
Q9BVW5	TIMELESS-interacting protein	TIPIN	1.3568	NaN	NaN	1.5282	NaN	NaN	1.4414	1.622	NaN	NaN	Q9BVW5	1	1	1	TIMELESS-interacting protein	TIPIN	sp|Q9BVW5|TIPIN_HUMAN TIMELESS-interacting protein OS=Homo sapiens OX=9606 GN=TIPIN PE=1 SV=2	1	1	1	1	0	1	1	1	0	0	0	0	1	0	0	1	1	1	0	0	0	0	1	0	0	1	1	1	0	0
Q9NPL8	Complex I assembly factor TIMMDC1, mitochondrial	TIMMDC1	0.81108	1.0176	0.96219	1.017	0.77075	0.90558	1.0402	0.90459	0.83694	1.1194	Q9NPL8	6	6	6	Complex I assembly factor TIMMDC1, mitochondrial	TIMMDC1	sp|Q9NPL8|TIDC1_HUMAN Complex I assembly factor TIMMDC1, mitochondrial OS=Homo sapiens OX=9606 GN=TIMMDC1 PE=1 SV=2	1	6	6	6	3	3	2	2	1	2	2	2	4	3	3	3	2	2	1	2	2	2	4	3	3	3	2	2	1	2
Q9Y5J7	Mitochondrial import inner membrane translocase subunit Tim9	TIMM9	1.0664	0.95353	1.0914	1.0011	0.91203	1.0737	2.3995	0.95918	0.7913	0.87809	Q9Y5J7	5	5	5	Mitochondrial import inner membrane translocase subunit Tim9	TIMM9	sp|Q9Y5J7|TIM9_HUMAN Mitochondrial import inner membrane translocase subunit Tim9 OS=Homo sapiens OX=9606 GN=TIMM9 PE=1 SV=1	1	5	5	5	4	3	3	1	2	2	4	2	3	3	4	3	3	1	2	2	4	2	3	3	4	3	3	1	2	2
Q9Y5J9	Mitochondrial import inner membrane translocase subunit Tim8 B	TIMM8B	1.1216	0.9957	1.0615	0.93529	1.2762	1.0176	0.98127	1.0205	NaN	0.58252	Q9Y5J9	4	4	4	Mitochondrial import inner membrane translocase subunit Tim8 B	TIMM8B	sp|Q9Y5J9|TIM8B_HUMAN Mitochondrial import inner membrane translocase subunit Tim8 B OS=Homo sapiens OX=9606 GN=TIMM8B PE=1 SV=1	1	4	4	4	4	3	4	3	0	1	3	3	2	4	4	3	4	3	0	1	3	3	2	4	4	3	4	3	0	1
O60220	Mitochondrial import inner membrane translocase subunit Tim8 A	TIMM8A	1.1028	1.0862	1.1653	0.95242	1.0771	1.0692	0.93405	0.84694	NaN	NaN	O60220	5	5	5	Mitochondrial import inner membrane translocase subunit Tim8 A	TIMM8A	sp|O60220|TIM8A_HUMAN Mitochondrial import inner membrane translocase subunit Tim8 A OS=Homo sapiens OX=9606 GN=TIMM8A PE=1 SV=1	1	5	5	5	3	4	3	4	0	0	3	4	4	4	3	4	3	4	0	0	3	4	4	4	3	4	3	4	0	0
Q3ZCQ8	Mitochondrial import inner membrane translocase subunit TIM50	TIMM50	0.87228	0.88802	0.87024	0.72153	0.74604	0.75623	0.7807	0.79373	0.91634	0.8723	Q3ZCQ8	12	12	12	Mitochondrial import inner membrane translocase subunit TIM50	TIMM50	sp|Q3ZCQ8|TIM50_HUMAN Mitochondrial import inner membrane translocase subunit TIM50 OS=Homo sapiens OX=9606 GN=TIMM50 PE=1 SV=2	1	12	12	12	5	6	6	5	6	8	5	6	5	5	5	6	6	5	6	8	5	6	5	5	5	6	6	5	6	8
O43615	Mitochondrial import inner membrane translocase subunit TIM44	TIMM44	0.9813	0.98431	0.96082	0.92316	0.98731	0.9619	0.90722	0.96705	0.83477	0.84537	O43615	24	24	24	Mitochondrial import inner membrane translocase subunit TIM44	TIMM44	sp|O43615|TIM44_HUMAN Mitochondrial import inner membrane translocase subunit TIM44 OS=Homo sapiens OX=9606 GN=TIMM44 PE=1 SV=2	1	24	24	24	13	13	13	14	14	15	14	13	13	12	13	13	13	14	14	15	14	13	13	12	13	13	13	14	14	15
O14925;Q5SRD1	Mitochondrial import inner membrane translocase subunit Tim23;Putative mitochondrial import inner membrane translocase subunit Tim23B	TIMM23;TIMM23B	1.3591	1.203	1.0948	1.222	1.3118	1.2449	0.8082	0.90935	1.4457	1.407	O14925;Q5SRD1	4;3	4;3	4;3	Mitochondrial import inner membrane translocase subunit Tim23;Putative mitochondrial import inner membrane translocase subunit Tim23B	TIMM23;TIMM23B	sp|O14925|TIM23_HUMAN Mitochondrial import inner membrane translocase subunit Tim23 OS=Homo sapiens OX=9606 GN=TIMM23 PE=1 SV=1;sp|Q5SRD1|TI23B_HUMAN Putative mitochondrial import inner membrane translocase subunit Tim23B OS=Homo sapiens OX=9606 GN=TIMM23B	2	4	4	4	4	3	2	3	2	2	3	2	3	3	4	3	2	3	2	2	3	2	3	3	4	3	2	3	2	2
Q9Y584	Mitochondrial import inner membrane translocase subunit Tim22	TIMM22	0.96447	0.88486	1.0232	0.95272	0.84155	1.041	1.2714	1.0528	NaN	NaN	Q9Y584	3	3	3	Mitochondrial import inner membrane translocase subunit Tim22	TIMM22	sp|Q9Y584|TIM22_HUMAN Mitochondrial import inner membrane translocase subunit Tim22 OS=Homo sapiens OX=9606 GN=TIMM22 PE=1 SV=2	1	3	3	3	1	1	1	2	0	1	1	1	1	1	1	1	1	2	0	1	1	1	1	1	1	1	1	2	0	1
Q9BVV7	Mitochondrial import inner membrane translocase subunit Tim21	TIMM21	NaN	NaN	NaN	NaN	NaN	0.69699	1.1789	NaN	0.9204	1.0189	Q9BVV7	4	4	4	Mitochondrial import inner membrane translocase subunit Tim21	TIMM21	sp|Q9BVV7|TIM21_HUMAN Mitochondrial import inner membrane translocase subunit Tim21 OS=Homo sapiens OX=9606 GN=TIMM21 PE=1 SV=1	1	4	4	4	0	0	1	0	2	1	0	1	0	0	0	0	1	0	2	1	0	1	0	0	0	0	1	0	2	1
O60830	Mitochondrial import inner membrane translocase subunit Tim17-B	TIMM17B	1.0495	1.1981	NaN	NaN	NaN	NaN	0.30579	NaN	NaN	NaN	O60830	4	2	2	Mitochondrial import inner membrane translocase subunit Tim17-B	TIMM17B	sp|O60830|TI17B_HUMAN Mitochondrial import inner membrane translocase subunit Tim17-B OS=Homo sapiens OX=9606 GN=TIMM17B PE=1 SV=1	1	4	2	2	1	0	1	2	0	0	2	1	3	4	0	0	1	0	0	0	1	1	2	2	0	0	1	0	0	0
Q99595	Mitochondrial import inner membrane translocase subunit Tim17-A	TIMM17A	1.0145	1.0096	0.9451	0.93949	1.0554	0.87378	1.049	0.90038	NaN	NaN	Q99595	5	5	3	Mitochondrial import inner membrane translocase subunit Tim17-A	TIMM17A	sp|Q99595|TI17A_HUMAN Mitochondrial import inner membrane translocase subunit Tim17-A OS=Homo sapiens OX=9606 GN=TIMM17A PE=1 SV=1	1	5	5	3	4	3	3	4	0	0	4	3	4	5	4	3	3	4	0	0	4	3	4	5	3	3	3	2	0	0
Q9Y5L4	Mitochondrial import inner membrane translocase subunit Tim13	TIMM13	0.99807	1.0375	1.0863	0.96813	0.94551	1.0176	0.96315	0.97981	1.0183	0.97331	Q9Y5L4	6	6	6	Mitochondrial import inner membrane translocase subunit Tim13	TIMM13	sp|Q9Y5L4|TIM13_HUMAN Mitochondrial import inner membrane translocase subunit Tim13 OS=Homo sapiens OX=9606 GN=TIMM13 PE=1 SV=1	1	6	6	6	4	5	5	5	4	4	5	4	5	5	4	5	5	5	4	4	5	4	5	5	4	5	5	5	4	4
P62072	Mitochondrial import inner membrane translocase subunit Tim10	TIMM10	NaN	NaN	1.0975	1.2353	1.0216	1.0366	1.2953	1.0574	0.47175	0.67833	P62072	3	3	3	Mitochondrial import inner membrane translocase subunit Tim10	TIMM10	sp|P62072|TIM10_HUMAN Mitochondrial import inner membrane translocase subunit Tim10 OS=Homo sapiens OX=9606 GN=TIMM10 PE=1 SV=1	1	3	3	3	1	1	1	1	1	2	1	2	1	1	1	1	1	1	1	2	1	2	1	1	1	1	1	1	1	2
Q9UNS1	Protein timeless homolog	TIMELESS	0.87616	1.0331	0.95984	0.85163	0.76298	1.0056	0.74158	0.90678	1.1773	1.0948	Q9UNS1	11	11	11	Protein timeless homolog	TIMELESS	sp|Q9UNS1|TIM_HUMAN Protein timeless homolog OS=Homo sapiens OX=9606 GN=TIMELESS PE=1 SV=2	1	11	11	11	6	6	7	7	1	2	4	5	5	7	6	6	7	7	1	2	4	5	5	7	6	6	7	7	1	2
Q9NQ88	Fructose-2,6-bisphosphatase TIGAR	TIGAR	0.96028	0.96745	0.8416	0.91997	0.64336	0.59903	0.87312	0.78987	NaN	0.46998	Q9NQ88	10	10	10	Fructose-2,6-bisphosphatase TIGAR	TIGAR	sp|Q9NQ88|TIGAR_HUMAN Fructose-2,6-bisphosphatase TIGAR OS=Homo sapiens OX=9606 GN=TIGAR PE=1 SV=1	1	10	10	10	5	5	3	3	2	3	2	2	7	4	5	5	3	3	2	3	2	2	7	4	5	5	3	3	2	3
Q01085	Nucleolysin TIAR	TIAL1	1.0903	0.944	0.95452	0.95045	0.92758	0.96184	0.90119	0.82295	1.0162	1.0434	Q01085	16	16	12	Nucleolysin TIAR	TIAL1	sp|Q01085|TIAR_HUMAN Nucleolysin TIAR OS=Homo sapiens OX=9606 GN=TIAL1 PE=1 SV=1	1	16	16	12	10	10	11	10	12	12	9	11	10	10	10	10	11	10	12	12	9	11	10	10	7	7	8	7	9	9
P31483	Nucleolysin TIA-1 isoform p40	TIA1	1.1315	1.1131	0.94119	1.0538	1.1463	1.0247	1.0006	0.82385	1.3616	1.4056	P31483	13	9	9	Nucleolysin TIA-1 isoform p40	TIA1	sp|P31483|TIA1_HUMAN Nucleolysin TIA-1 isoform p40 OS=Homo sapiens OX=9606 GN=TIA1 PE=1 SV=3	1	13	9	9	6	7	5	6	8	7	7	7	6	7	3	4	2	3	5	4	5	4	3	4	3	4	2	3	5	4
Q9P016	Thymocyte nuclear protein 1	THYN1	1.0925	0.96245	1.1452	1.0213	1.1806	1.1649	1.1416	1.1864	1.2335	1.1241	Q9P016	8	8	8	Thymocyte nuclear protein 1	THYN1	sp|Q9P016|THYN1_HUMAN Thymocyte nuclear protein 1 OS=Homo sapiens OX=9606 GN=THYN1 PE=1 SV=1	1	8	8	8	4	4	2	3	2	2	5	6	6	4	4	4	2	3	2	2	5	6	6	4	4	4	2	3	2	2
Q9BV44	THUMP domain-containing protein 3	THUMPD3	1.0254	1.0772	1.0185	0.94368	0.98362	0.85979	0.83627	0.8713	0.87486	0.84285	Q9BV44	14	14	14	THUMP domain-containing protein 3	THUMPD3	sp|Q9BV44|THUM3_HUMAN THUMP domain-containing protein 3 OS=Homo sapiens OX=9606 GN=THUMPD3 PE=1 SV=1	1	14	14	14	7	7	5	8	4	4	6	8	8	10	7	7	5	8	4	4	6	8	8	10	7	7	5	8	4	4
Q9NXG2	THUMP domain-containing protein 1	THUMPD1	0.99769	0.99677	0.95609	1.0375	0.99638	1.0643	0.96387	1.0407	0.99096	0.93196	Q9NXG2	17	17	17	THUMP domain-containing protein 1	THUMPD1	sp|Q9NXG2|THUM1_HUMAN THUMP domain-containing protein 1 OS=Homo sapiens OX=9606 GN=THUMPD1 PE=1 SV=2	1	17	17	17	9	11	9	9	7	6	8	10	10	10	9	11	9	9	7	6	8	10	10	10	9	11	9	9	7	6
Q9Y2W1	Thyroid hormone receptor-associated protein 3	THRAP3	0.98421	0.97206	1.0013	0.96624	0.95411	0.96688	0.99771	0.96363	1.0138	1.0383	Q9Y2W1	38	38	37	Thyroid hormone receptor-associated protein 3	THRAP3	sp|Q9Y2W1|TR150_HUMAN Thyroid hormone receptor-associated protein 3 OS=Homo sapiens OX=9606 GN=THRAP3 PE=1 SV=2	1	38	38	37	23	23	22	22	22	19	22	23	23	23	23	23	22	22	22	19	22	23	23	23	22	22	21	21	21	19
P52888	Thimet oligopeptidase	THOP1	0.96789	1.0498	1.0948	1.0564	1.0814	1.0602	1.2092	1.2756	1.0573	1.0396	P52888	29	29	29	Thimet oligopeptidase	THOP1	sp|P52888|THOP1_HUMAN Thimet oligopeptidase OS=Homo sapiens OX=9606 GN=THOP1 PE=1 SV=2	1	29	29	29	19	16	14	16	16	14	14	18	15	16	19	16	14	16	16	14	14	18	15	16	19	16	14	16	16	14
Q6I9Y2	THO complex subunit 7 homolog	THOC7	1.0955	0.95004	0.94095	0.81358	1.254	0.98481	0.86754	1.3701	1.045	0.97879	Q6I9Y2	3	3	3	THO complex subunit 7 homolog	THOC7	sp|Q6I9Y2|THOC7_HUMAN THO complex subunit 7 homolog OS=Homo sapiens OX=9606 GN=THOC7 PE=1 SV=3	1	3	3	3	2	1	2	2	1	2	2	1	2	1	2	1	2	2	1	2	2	1	2	1	2	1	2	2	1	2
Q86W42	THO complex subunit 6 homolog	THOC6	1.1059	1.0499	0.95839	0.95304	1.0442	0.94311	0.83647	0.75529	NaN	NaN	Q86W42	9	9	9	THO complex subunit 6 homolog	THOC6	sp|Q86W42|THOC6_HUMAN THO complex subunit 6 homolog OS=Homo sapiens OX=9606 GN=THOC6 PE=1 SV=1	1	9	9	9	3	5	5	5	2	0	5	3	5	3	3	5	5	5	2	0	5	3	5	3	3	5	5	5	2	0
Q13769	THO complex subunit 5 homolog	THOC5	0.93433	0.90817	0.85999	0.92495	1.3464	0.9021	0.85484	0.79607	1.0502	1.1095	Q13769	7	7	7	THO complex subunit 5 homolog	THOC5	sp|Q13769|THOC5_HUMAN THO complex subunit 5 homolog OS=Homo sapiens OX=9606 GN=THOC5 PE=1 SV=2	1	7	7	7	3	1	4	2	2	2	4	3	4	4	3	1	4	2	2	2	4	3	4	4	3	1	4	2	2	2
Q96J01	THO complex subunit 3	THOC3	1.0257	1.0695	1.019	1.0165	0.9616	1.0246	0.97473	0.93338	1.1202	1.1007	Q96J01	13	13	13	THO complex subunit 3	THOC3	sp|Q96J01|THOC3_HUMAN THO complex subunit 3 OS=Homo sapiens OX=9606 GN=THOC3 PE=1 SV=1	1	13	13	13	10	9	10	9	7	5	9	7	11	10	10	9	10	9	7	5	9	7	11	10	10	9	10	9	7	5
Q8NI27	THO complex subunit 2	THOC2	0.98713	0.99918	1.0135	1.0282	0.99939	1.0096	0.97734	0.92081	1.1634	1.0978	Q8NI27	26	26	26	THO complex subunit 2	THOC2	sp|Q8NI27|THOC2_HUMAN THO complex subunit 2 OS=Homo sapiens OX=9606 GN=THOC2 PE=1 SV=2	1	26	26	26	12	13	16	15	10	9	17	17	15	15	12	13	16	15	10	9	17	17	15	15	12	13	16	15	10	9
Q96FV9	THO complex subunit 1	THOC1	0.92886	0.97876	1.0858	0.85078	0.95542	0.88265	1.0237	0.75979	0.69526	0.76331	Q96FV9	17	17	17	THO complex subunit 1	THOC1	sp|Q96FV9|THOC1_HUMAN THO complex subunit 1 OS=Homo sapiens OX=9606 GN=THOC1 PE=1 SV=1	1	17	17	17	3	4	5	3	5	3	3	7	8	3	3	4	5	3	5	3	3	7	8	3	3	4	5	3	5	3
Q8IYQ7	Threonine synthase-like 1	THNSL1	0.74829	NaN	NaN	NaN	1.3923	1.53	1.0829	0.85183	0.64386	NaN	Q8IYQ7	7	7	7	Threonine synthase-like 1	THNSL1	sp|Q8IYQ7|THNS1_HUMAN Threonine synthase-like 1 OS=Homo sapiens OX=9606 GN=THNSL1 PE=1 SV=2	1	7	7	7	1	0	2	2	2	0	4	2	2	0	1	0	2	2	2	0	4	2	2	0	1	0	2	2	2	0
Q9NWX6	Probable tRNA(His) guanylyltransferase	THG1L	0.99926	1.0908	1.0472	1.0881	1.0127	1.0865	0.89227	1.0829	0.88725	1.4052	Q9NWX6	8	8	8	Probable tRNA(His) guanylyltransferase	THG1L	sp|Q9NWX6|THG1_HUMAN Probable tRNA(His) guanylyltransferase OS=Homo sapiens OX=9606 GN=THG1L PE=1 SV=2	1	8	8	8	4	4	5	5	3	3	5	7	5	4	4	4	5	5	3	3	5	7	5	4	4	4	5	5	3	3
Q8WUY1	Protein THEM6	THEM6	0.97833	1.0451	0.96303	1.1248	0.92134	1.2478	1.1709	0.89337	1.2248	1.144	Q8WUY1	5	5	5	Protein THEM6	THEM6	sp|Q8WUY1|THEM6_HUMAN Protein THEM6 OS=Homo sapiens OX=9606 GN=THEM6 PE=1 SV=2	1	5	5	5	1	2	2	2	2	2	3	3	2	2	1	2	2	2	2	2	3	3	2	2	1	2	2	2	2	2
Q6YHU6	Thyroid adenoma-associated protein	THADA	0.99036	0.87525	0.90551	2.5684	0.82238	0.70751	0.63945	0.64061	1.1821	0.92723	Q6YHU6	14	14	14	Thyroid adenoma-associated protein	THADA	sp|Q6YHU6|THADA_HUMAN Thyroid adenoma-associated protein OS=Homo sapiens OX=9606 GN=THADA PE=1 SV=1	1	14	14	14	3	4	6	8	3	4	2	3	4	7	3	4	6	8	3	4	2	3	4	7	3	4	6	8	3	4
Q96RS0	Trimethylguanosine synthase	TGS1	1.2514	1.1249	1.0252	1.2653	1.0156	1.0526	0.82226	0.91273	NaN	NaN	Q96RS0	3	3	3	Trimethylguanosine synthase	TGS1	sp|Q96RS0|TGS1_HUMAN Trimethylguanosine synthase OS=Homo sapiens OX=9606 GN=TGS1 PE=1 SV=3	1	3	3	3	2	2	3	2	0	0	3	2	2	2	2	2	3	2	0	0	3	2	2	2	2	2	3	2	0	0
O43493	Trans-Golgi network integral membrane protein 2	TGOLN2	0.75774	NaN	0.86256	0.94534	0.78088	0.5437	1.7606	2.3925	NaN	NaN	O43493	4	4	4	Trans-Golgi network integral membrane protein 2	TGOLN2	sp|O43493|TGON2_HUMAN Trans-Golgi network integral membrane protein 2 OS=Homo sapiens OX=9606 GN=TGOLN2 PE=1 SV=3	1	4	4	4	4	2	2	1	0	0	1	1	2	0	4	2	2	1	0	0	1	1	2	0	4	2	2	1	0	0
P21980	Protein-glutamine gamma-glutamyltransferase 2	TGM2	NaN	NaN	0.85713	1.0013	NaN	1.4519	NaN	2.9895	NaN	NaN	P21980	5	5	5	Protein-glutamine gamma-glutamyltransferase 2	TGM2	sp|P21980|TGM2_HUMAN Protein-glutamine gamma-glutamyltransferase 2 OS=Homo sapiens OX=9606 GN=TGM2 PE=1 SV=2	1	5	5	5	2	2	0	1	1	1	0	1	0	0	2	2	0	1	1	1	0	1	0	0	2	2	0	1	1	1
Q15583;Q9GZN2	Homeobox protein TGIF1	TGIF1	0.67043	1.0896	NaN	NaN	0.62199	NaN	0.78967	NaN	NaN	NaN	Q15583	4;1	4;1	4;1	Homeobox protein TGIF1	TGIF1	sp|Q15583|TGIF1_HUMAN Homeobox protein TGIF1 OS=Homo sapiens OX=9606 GN=TGIF1 PE=1 SV=3	2	4	4	4	0	1	2	2	1	0	1	0	1	2	0	1	2	2	1	0	1	0	1	2	0	1	2	2	1	0
P02786;Q9UP52	Transferrin receptor protein 1;Transferrin receptor protein 1, serum form	TFRC	1.0121	1.0742	1.0146	1.0227	0.9681	0.97757	0.89672	0.87423	0.81432	0.79932	P02786	41;1	41;1	41;1	Transferrin receptor protein 1;Transferrin receptor protein 1, serum form	TFRC	sp|P02786|TFR1_HUMAN Transferrin receptor protein 1 OS=Homo sapiens OX=9606 GN=TFRC PE=1 SV=2	2	41	41	41	29	27	27	28	27	25	26	28	30	29	29	27	27	28	27	25	26	28	30	29	29	27	27	28	27	25
Q9UBB9	Tuftelin-interacting protein 11	TFIP11	1.0291	0.91754	0.99186	0.91565	0.94874	1.0159	0.88059	0.84322	1.7205	1.2639	Q9UBB9	18	18	18	Tuftelin-interacting protein 11	TFIP11	sp|Q9UBB9|TFP11_HUMAN Tuftelin-interacting protein 11 OS=Homo sapiens OX=9606 GN=TFIP11 PE=1 SV=1	1	18	18	18	7	6	8	8	2	5	10	10	13	8	7	6	8	8	2	5	10	10	13	8	7	6	8	8	2	5
Q92734	Protein TFG	TFG	1.0149	0.97178	0.98149	0.9484	0.97274	0.99571	1.1357	1.1014	0.8879	0.86367	Q92734	14	14	14	Protein TFG	TFG	sp|Q92734|TFG_HUMAN Protein TFG OS=Homo sapiens OX=9606 GN=TFG PE=1 SV=2	1	14	14	14	9	9	8	7	9	10	7	9	9	8	9	9	8	7	9	10	7	9	9	8	9	9	8	7	9	10
Q14186	Transcription factor Dp-1	TFDP1	1.0646	0.80752	NaN	1.0358	NaN	0.44313	NaN	0.87431	NaN	1.0897	Q14186	4	4	4	Transcription factor Dp-1	TFDP1	sp|Q14186|TFDP1_HUMAN Transcription factor Dp-1 OS=Homo sapiens OX=9606 GN=TFDP1 PE=1 SV=1	1	4	4	4	0	1	0	1	1	1	0	1	4	2	0	1	0	1	1	1	0	1	4	2	0	1	0	1	1	1
Q12800;Q9NZI6	Alpha-globin transcription factor CP2	TFCP2	1.1842	1.8703	1.1359	1.1753	1.396	1.5018	1.2511	1.4299	0.88781	0.90283	Q12800	6;1	6;1	5;1	Alpha-globin transcription factor CP2	TFCP2	sp|Q12800|TFCP2_HUMAN Alpha-globin transcription factor CP2 OS=Homo sapiens OX=9606 GN=TFCP2 PE=1 SV=2	2	6	6	5	3	4	5	4	3	3	3	4	3	5	3	4	5	4	3	3	3	4	3	5	2	3	4	3	2	2
Q9H5Q4	Dimethyladenosine transferase 2, mitochondrial	TFB2M	0.99413	0.95789	0.9085	0.92372	1.0248	0.9081	1.1624	1.1202	1.0152	1.0965	Q9H5Q4	18	18	18	Dimethyladenosine transferase 2, mitochondrial	TFB2M	sp|Q9H5Q4|TFB2M_HUMAN Dimethyladenosine transferase 2, mitochondrial OS=Homo sapiens OX=9606 GN=TFB2M PE=1 SV=1	1	18	18	18	12	13	12	11	4	4	13	13	12	10	12	13	12	11	4	4	13	13	12	10	12	13	12	11	4	4
Q8WVM0	Dimethyladenosine transferase 1, mitochondrial	TFB1M	0.99355	0.88628	0.95934	0.9153	0.85069	1.0797	0.67807	0.76942	0.93374	1.33	Q8WVM0	11	11	11	Dimethyladenosine transferase 1, mitochondrial	TFB1M	sp|Q8WVM0|TFB1M_HUMAN Dimethyladenosine transferase 1, mitochondrial OS=Homo sapiens OX=9606 GN=TFB1M PE=1 SV=1	1	11	11	11	6	6	4	3	2	1	7	6	5	7	6	6	4	3	2	1	7	6	5	7	6	6	4	3	2	1
Q01664	Transcription factor AP-4	TFAP4	1.0654	1.2457	0.95658	0.97017	0.94786	1.4993	1.2834	0.85857	1.499	1.9335	Q01664	3	3	3	Transcription factor AP-4	TFAP4	sp|Q01664|TFAP4_HUMAN Transcription factor AP-4 OS=Homo sapiens OX=9606 GN=TFAP4 PE=1 SV=2	1	3	3	3	3	3	2	3	2	1	3	2	2	2	3	3	2	3	2	1	3	2	2	2	3	3	2	3	2	1
Q00059	Transcription factor A, mitochondrial	TFAM	0.98464	0.95958	0.93457	0.92693	0.90179	0.96813	0.91631	0.9776	0.80175	0.82703	Q00059	16	16	16	Transcription factor A, mitochondrial	TFAM	sp|Q00059|TFAM_HUMAN Transcription factor A, mitochondrial OS=Homo sapiens OX=9606 GN=TFAM PE=1 SV=1	1	16	16	16	7	7	6	7	5	5	8	8	8	9	7	7	6	7	5	5	8	8	8	9	7	7	6	7	5	5
Q9Y6I9	Testis-expressed sequence 264 protein	TEX264	1.097	0.92053	0.89153	1.0612	1.2867	1.1199	1.0796	1.0857	NaN	NaN	Q9Y6I9	8	8	7	Testis-expressed sequence 264 protein	TEX264	sp|Q9Y6I9|TX264_HUMAN Testis-expressed protein 264 OS=Homo sapiens OX=9606 GN=TEX264 PE=1 SV=1	1	8	8	7	3	5	3	4	0	0	4	3	4	4	3	5	3	4	0	0	4	3	4	4	2	4	2	3	0	0
Q9NXF1	Testis-expressed sequence 10 protein	TEX10	0.99185	1.0318	0.96675	1.001	1.0441	0.97623	0.82081	0.8677	0.83073	0.73916	Q9NXF1	19	19	19	Testis-expressed sequence 10 protein	TEX10	sp|Q9NXF1|TEX10_HUMAN Testis-expressed protein 10 OS=Homo sapiens OX=9606 GN=TEX10 PE=1 SV=2	1	19	19	19	6	6	9	9	7	5	7	6	9	11	6	6	9	9	7	5	7	6	9	11	6	6	9	9	7	5
Q9UGI8	Testin	TES	1.0102	1.0216	0.98565	1.0098	1.0229	1.0141	0.75728	0.72566	0.86723	0.83436	Q9UGI8	28	28	28	Testin	TES	sp|Q9UGI8|TES_HUMAN Testin OS=Homo sapiens OX=9606 GN=TES PE=1 SV=1	1	28	28	28	18	19	18	19	17	17	19	17	20	20	18	19	18	19	17	17	19	17	20	20	18	19	18	19	17	17
Q9NYB0	Telomeric repeat-binding factor 2-interacting protein 1	TERF2IP	0.9447	0.94379	1.0101	0.96132	0.89551	1.0219	0.93645	0.95721	1.0005	1.0301	Q9NYB0	15	15	15	Telomeric repeat-binding factor 2-interacting protein 1	TERF2IP	sp|Q9NYB0|TE2IP_HUMAN Telomeric repeat-binding factor 2-interacting protein 1 OS=Homo sapiens OX=9606 GN=TERF2IP PE=1 SV=1	1	15	15	15	8	10	8	10	8	8	10	9	9	11	8	10	8	10	8	8	10	9	9	11	8	10	8	10	8	8
Q15554	Telomeric repeat-binding factor 2	TERF2	1.0993	1.2045	1.119	1.0755	0.6888	0.99675	1.2085	1.2096	1.0481	1.269	Q15554	12	12	12	Telomeric repeat-binding factor 2	TERF2	sp|Q15554|TERF2_HUMAN Telomeric repeat-binding factor 2 OS=Homo sapiens OX=9606 GN=TERF2 PE=1 SV=3	1	12	12	12	3	7	3	5	7	9	4	5	4	6	3	7	3	5	7	9	4	5	4	6	3	7	3	5	7	9
Q9UKZ4	Teneurin-1;Ten-1 intracellular domain;Teneurin C-terminal-associated peptide	TENM1	NaN	NaN	0.84968	1.1337	NaN	NaN	NaN	NaN	NaN	NaN	Q9UKZ4	2	2	2	Teneurin-1;Ten-1 intracellular domain;Teneurin C-terminal-associated peptide	TENM1	sp|Q9UKZ4|TEN1_HUMAN Teneurin-1 OS=Homo sapiens OX=9606 GN=TENM1 PE=1 SV=2	1	2	2	2	1	1	0	0	0	0	1	0	0	0	1	1	0	0	0	0	1	0	0	0	1	1	0	0	0	0
Q9Y4R8	Telomere length regulation protein TEL2 homolog	TELO2	1.0049	0.84993	1.3359	1.048	1.0674	1.1234	0.91589	0.85913	1.3722	2.1641	Q9Y4R8	19	19	19	Telomere length regulation protein TEL2 homolog	TELO2	sp|Q9Y4R8|TELO2_HUMAN Telomere length regulation protein TEL2 homolog OS=Homo sapiens OX=9606 GN=TELO2 PE=1 SV=2	1	19	19	19	5	3	5	2	7	5	8	7	6	6	5	3	5	2	7	5	8	7	6	6	5	3	5	2	7	5
Q9NZ01;Q9UPA5	Very-long-chain enoyl-CoA reductase	TECR	0.99128	1.0904	1.0451	1.087	1.0698	1.158	1.1232	1.186	1.0011	1.0134	Q9NZ01	14;1	14;1	14;1	Very-long-chain enoyl-CoA reductase	TECR	sp|Q9NZ01|TECR_HUMAN Very-long-chain enoyl-CoA reductase OS=Homo sapiens OX=9606 GN=TECR PE=1 SV=1	2	14	14	14	8	8	9	6	8	9	9	9	8	9	8	8	9	6	8	9	9	9	8	9	8	8	9	6	8	9
O15040	Tectonin beta-propeller repeat-containing protein 2	TECPR2	NaN	NaN	NaN	NaN	NaN	NaN	NaN	NaN	NaN	NaN	O15040	1	1	1	Tectonin beta-propeller repeat-containing protein 2	TECPR2	sp|O15040|TCPR2_HUMAN Tectonin beta-propeller repeat-containing protein 2 OS=Homo sapiens OX=9606 GN=TECPR2 PE=1 SV=4	1	1	1	1	0	0	0	0	1	1	0	0	0	0	0	0	0	0	1	1	0	0	0	0	0	0	0	0	1	1
P28347;Q99594;Q15561;Q15562	Transcriptional enhancer factor TEF-1;Transcriptional enhancer factor TEF-5;Transcriptional enhancer factor TEF-3;Transcriptional enhancer factor TEF-4	TEAD1;TEAD3;TEAD4;TEAD2	NaN	NaN	NaN	NaN	NaN	1.3958	NaN	NaN	1.0687	0.93957	P28347;Q99594;Q15561;Q15562	5;4;3;3	5;4;3;3	5;4;3;3	Transcriptional enhancer factor TEF-1;Transcriptional enhancer factor TEF-5;Transcriptional enhancer factor TEF-3;Transcriptional enhancer factor TEF-4	TEAD1;TEAD3;TEAD4;TEAD2	sp|P28347|TEAD1_HUMAN Transcriptional enhancer factor TEF-1 OS=Homo sapiens OX=9606 GN=TEAD1 PE=1 SV=2;sp|Q99594|TEAD3_HUMAN Transcriptional enhancer factor TEF-5 OS=Homo sapiens OX=9606 GN=TEAD3 PE=1 SV=2;sp|Q15561|TEAD4_HUMAN Transcriptional enhancer fac	4	5	5	5	0	0	1	0	2	3	0	1	0	0	0	0	1	0	2	3	0	1	0	0	0	0	1	0	2	3
Q9H7E2	Tudor domain-containing protein 3	TDRD3	1.0505	1.18	0.9425	1.2254	1.121	0.99402	1.3823	1.0344	NaN	1.1185	Q9H7E2	3	3	3	Tudor domain-containing protein 3	TDRD3	sp|Q9H7E2|TDRD3_HUMAN Tudor domain-containing protein 3 OS=Homo sapiens OX=9606 GN=TDRD3 PE=1 SV=1	1	3	3	3	2	2	2	1	0	1	1	1	2	3	2	2	2	1	0	1	1	1	2	3	2	2	2	1	0	1
O95551	Tyrosyl-DNA phosphodiesterase 2	TDP2	0.9505	0.90315	0.84263	0.73145	1.0422	1.0616	0.63924	0.78868	0.9053	1.3099	O95551	7	7	7	Tyrosyl-DNA phosphodiesterase 2	TDP2	sp|O95551|TYDP2_HUMAN Tyrosyl-DNA phosphodiesterase 2 OS=Homo sapiens OX=9606 GN=TDP2 PE=1 SV=1	1	7	7	7	1	1	3	3	2	2	3	3	2	3	1	1	3	3	2	2	3	3	2	3	1	1	3	3	2	2
REV__P21675;Q8N4U5	T-complex protein 11-like protein 2	TCP11L2	0.31153	0.41637	0.37896	0.48779	0.38926	0.36808	0.56079	0.39866	1.1037	1.1687	REV__P21675;Q8N4U5	1;1	1;1	1;1	T-complex protein 11-like protein 2	TCP11L2	sp|P21675|TAF1_HUMAN Transcription initiation factor TFIID subunit 1 OS=Homo sapiens OX=9606 GN=TAF1 PE=1 SV=2;sp|Q8N4U5|T11L2_HUMAN T-complex protein 11-like protein 2 OS=Homo sapiens OX=9606 GN=TCP11L2 PE=2 SV=1	2	1	1	1	1	1	1	1	1	1	1	1	1	1	1	1	1	1	1	1	1	1	1	1	1	1	1	1	1	1
P17987	T-complex protein 1 subunit alpha	TCP1	1.0309	1.0646	1.0269	1.059	0.98644	1.0283	0.96093	0.9393	0.72463	0.72735	P17987	46	46	46	T-complex protein 1 subunit alpha	TCP1	sp|P17987|TCPA_HUMAN T-complex protein 1 subunit alpha OS=Homo sapiens OX=9606 GN=TCP1 PE=1 SV=1	1	46	46	46	30	31	30	29	38	37	28	29	30	32	30	31	30	29	38	37	28	29	30	32	30	31	30	29	38	37
Q13428	Treacle protein	TCOF1	1.0308	0.95863	1.0577	0.99316	0.9458	1.0638	0.9853	0.98731	0.53651	0.51624	Q13428	34	34	34	Treacle protein	TCOF1	sp|Q13428|TCOF_HUMAN Treacle protein OS=Homo sapiens OX=9606 GN=TCOF1 PE=1 SV=3	1	34	34	34	28	27	27	25	14	13	19	20	27	26	28	27	27	25	14	13	19	20	27	26	28	27	27	25	14	13
Q07283;REV__Q8N4Y2	Trichohyalin	TCHH	0.96238	1.0207	0.98834	1.0055	0.96671	1.0037	1.2312	1.1728	0.66035	NaN	Q07283	4;1	4;1	3;0	Trichohyalin	TCHH	sp|Q07283|TRHY_HUMAN Trichohyalin OS=Homo sapiens OX=9606 GN=TCHH PE=1 SV=2	2	4	4	3	1	2	2	1	1	0	1	2	2	1	1	2	2	1	1	0	1	2	2	1	0	1	1	0	0	0
Q9NQB0;P36402;Q9UJU2;Q9HCS4	Transcription factor 7-like 2	TCF7L2	1.0906	1.067	1.1277	1.1804	0.89062	1.0759	0.72547	2.8952	NaN	NaN	Q9NQB0	4;1;1;1	4;1;1;1	4;1;1;1	Transcription factor 7-like 2	TCF7L2	sp|Q9NQB0|TF7L2_HUMAN Transcription factor 7-like 2 OS=Homo sapiens OX=9606 GN=TCF7L2 PE=1 SV=2	4	4	4	4	1	1	1	2	0	2	1	1	2	3	1	1	1	2	0	2	1	1	2	3	1	1	1	2	0	2
Q9BQ70	Transcription factor 25	TCF25	0.90496	0.97285	0.98099	0.94231	0.94089	0.91715	0.97608	1.0141	1.1869	1.1368	Q9BQ70	31	31	31	Transcription factor 25	TCF25	sp|Q9BQ70|TCF25_HUMAN Transcription factor 25 OS=Homo sapiens OX=9606 GN=TCF25 PE=1 SV=1	1	31	31	31	22	22	19	20	8	12	20	21	18	20	22	22	19	20	8	12	20	21	18	20	22	22	19	20	8	12
Q9UGU0	Transcription factor 20	TCF20	0.99163	0.7689	1.1044	0.82318	NaN	0.82524	2.4263	1.5906	0.69398	0.67504	Q9UGU0	5	5	5	Transcription factor 20	TCF20	sp|Q9UGU0|TCF20_HUMAN Transcription factor 20 OS=Homo sapiens OX=9606 GN=TCF20 PE=1 SV=3	1	5	5	5	1	3	1	2	2	1	0	1	2	2	1	3	1	2	2	1	0	1	2	2	1	3	1	2	2	1
Q99081	Transcription factor 12	TCF12	0.91863	NaN	NaN	1.4739	0.95462	NaN	NaN	NaN	1.9455	2.4139	Q99081	5	5	5	Transcription factor 12	TCF12	sp|Q99081|HTF4_HUMAN Transcription factor 12 OS=Homo sapiens OX=9606 GN=TCF12 PE=1 SV=1	1	5	5	5	0	1	0	0	2	2	2	0	1	0	0	1	0	0	2	2	2	0	1	0	0	1	0	0	2	2
O14776	Transcription elongation regulator 1	TCERG1	1.0017	0.982	1.0526	1.0361	0.93602	0.96467	1.0092	0.96393	1.1207	1.066	O14776	39	39	37	Transcription elongation regulator 1	TCERG1	sp|O14776|TCRG1_HUMAN Transcription elongation regulator 1 OS=Homo sapiens OX=9606 GN=TCERG1 PE=1 SV=2	1	39	39	37	23	22	21	20	12	12	22	24	26	21	23	22	21	20	12	12	22	24	26	21	22	22	20	19	11	12
Q14241	Transcription elongation factor B polypeptide 3	TCEB3	0.91769	1.0279	0.97996	0.85179	0.89051	0.94699	0.39352	0.37244	1.1127	1.2386	Q14241	11	11	11	Transcription elongation factor B polypeptide 3	TCEB3	sp|Q14241|ELOA1_HUMAN Elongin-A OS=Homo sapiens OX=9606 GN=ELOA PE=1 SV=2	1	11	11	11	3	2	5	3	2	3	7	6	7	5	3	2	5	3	2	3	7	6	7	5	3	2	5	3	2	3
Q15370	Transcription elongation factor B polypeptide 2	TCEB2	0.95586	0.96997	1.0257	0.98808	0.9458	0.95531	0.94025	0.97086	1.2058	1.2428	Q15370	15	15	15	Transcription elongation factor B polypeptide 2	TCEB2	sp|Q15370|ELOB_HUMAN Elongin-B OS=Homo sapiens OX=9606 GN=ELOB PE=1 SV=1	1	15	15	15	10	9	10	9	9	8	10	10	10	10	10	9	10	9	9	8	10	10	10	10	10	9	10	9	9	8
Q15369	Transcription elongation factor B polypeptide 1	TCEB1	0.96431	0.935	1.0013	0.97762	1.1177	1.0088	0.92555	0.92041	1.2634	1.3122	Q15369	10	10	10	Transcription elongation factor B polypeptide 1	TCEB1	sp|Q15369|ELOC_HUMAN Elongin-C OS=Homo sapiens OX=9606 GN=ELOC PE=1 SV=1	1	10	10	10	6	7	6	6	8	8	7	7	6	7	6	7	6	6	8	8	7	7	6	7	6	7	6	6	8	8
Q96EI5	Transcription elongation factor A protein-like 4	TCEAL4	0.99288	0.82142	0.785	NaN	NaN	0.97801	0.70503	NaN	NaN	NaN	Q96EI5	2	2	2	Transcription elongation factor A protein-like 4	TCEAL4	sp|Q96EI5|TCAL4_HUMAN Transcription elongation factor A protein-like 4 OS=Homo sapiens OX=9606 GN=TCEAL4 PE=1 SV=2	1	2	2	2	1	0	1	1	0	0	0	1	2	2	1	0	1	1	0	0	0	1	2	2	1	0	1	1	0	0
O75764	Transcription elongation factor A protein 3	TCEA3	NaN	NaN	NaN	NaN	NaN	NaN	NaN	NaN	NaN	NaN	O75764	1	1	1	Transcription elongation factor A protein 3	TCEA3	sp|O75764|TCEA3_HUMAN Transcription elongation factor A protein 3 OS=Homo sapiens OX=9606 GN=TCEA3 PE=1 SV=2	1	1	1	1	0	0	0	0	0	1	0	0	0	0	0	0	0	0	0	1	0	0	0	0	0	0	0	0	0	1
P23193	Transcription elongation factor A protein 1	TCEA1	1.0032	1.0273	1.0826	1.0306	0.9973	1.0361	0.97074	0.97321	0.97447	0.94932	P23193	20	20	18	Transcription elongation factor A protein 1	TCEA1	sp|P23193|TCEA1_HUMAN Transcription elongation factor A protein 1 OS=Homo sapiens OX=9606 GN=TCEA1 PE=1 SV=2	1	20	20	18	9	12	10	10	11	13	10	11	15	14	9	12	10	10	11	13	10	11	15	14	7	10	8	8	11	12
Q9Y4C2;A0A1B0GVM2;A6NFQ2	TRPM8 channel-associated factor 1	TCAF1	NaN	NaN	NaN	0.57941	1.656	1.196	0.38302	NaN	NaN	1.582	Q9Y4C2	7;1;1	7;1;1	7;1;1	TRPM8 channel-associated factor 1	TCAF1	sp|Q9Y4C2|TCAF1_HUMAN TRPM8 channel-associated factor 1 OS=Homo sapiens OX=9606 GN=TCAF1 PE=1 SV=3	3	7	7	7	1	2	2	0	0	1	3	5	0	0	1	2	2	0	0	1	3	5	0	0	1	2	2	0	0	1
Q969Z0	Protein TBRG4	TBRG4	1.0021	1.0088	1.0384	1.0742	1.0188	1.1044	0.90009	0.8047	1.0736	1.0826	Q969Z0	22	22	22	Protein TBRG4	TBRG4	sp|Q969Z0|FAKD4_HUMAN FAST kinase domain-containing protein 4 OS=Homo sapiens OX=9606 GN=TBRG4 PE=1 SV=1	1	22	22	22	12	12	12	12	12	11	15	18	12	10	12	12	12	12	12	11	15	18	12	10	12	12	12	12	12	11
Q6SJ96;P20226	TATA box-binding protein-like protein 2;TATA-box-binding protein	TBPL2;TBP	0.4449	NaN	1.1398	1.3424	NaN	1.1371	1.0685	NaN	NaN	0.94555	Q6SJ96;P20226	3;2	3;2	3;2	TATA box-binding protein-like protein 2;TATA-box-binding protein	TBPL2;TBP	sp|Q6SJ96|TBPL2_HUMAN TATA box-binding protein-like protein 2 OS=Homo sapiens OX=9606 GN=TBPL2 PE=2 SV=1;sp|P20226|TBP_HUMAN TATA-box-binding protein OS=Homo sapiens OX=9606 GN=TBP PE=1 SV=2	2	3	3	3	1	1	2	0	0	1	0	3	2	1	1	1	2	0	0	1	0	3	2	1	1	1	2	0	0	1
P62380	TATA box-binding protein-like protein 1	TBPL1	1.0962	NaN	0.92817	NaN	0.83811	NaN	NaN	0.86727	NaN	NaN	P62380	3	3	3	TATA box-binding protein-like protein 1	TBPL1	sp|P62380|TBPL1_HUMAN TATA box-binding protein-like protein 1 OS=Homo sapiens OX=9606 GN=TBPL1 PE=1 SV=1	1	3	3	3	1	0	0	1	0	0	1	0	1	1	1	0	0	1	0	0	1	0	1	1	1	0	0	1	0	0
Q12788	Transducin beta-like protein 3	TBL3	1.0052	0.98951	0.96592	1.0039	1.0294	1.0021	0.76658	0.70615	0.77914	0.76742	Q12788	37	37	37	Transducin beta-like protein 3	TBL3	sp|Q12788|TBL3_HUMAN Transducin beta-like protein 3 OS=Homo sapiens OX=9606 GN=TBL3 PE=1 SV=2	1	37	37	37	19	20	19	21	17	16	19	22	22	22	19	20	19	21	17	16	19	22	22	22	19	20	19	21	17	16
Q9Y4P3	Transducin beta-like protein 2	TBL2	1.0567	1.1163	1.0132	1.1282	1.0108	1.1613	0.9727	0.92364	0.86733	0.92359	Q9Y4P3	14	14	14	Transducin beta-like protein 2	TBL2	sp|Q9Y4P3|TBL2_HUMAN Transducin beta-like protein 2 OS=Homo sapiens OX=9606 GN=TBL2 PE=1 SV=1	1	14	14	14	9	8	8	8	8	7	5	6	11	9	9	8	8	8	8	7	5	6	11	9	9	8	8	8	8	7
Q9BZK7	F-box-like/WD repeat-containing protein TBL1XR1	TBL1XR1	1.0448	0.94748	1.0466	0.91137	0.94881	0.95482	0.78134	0.81877	1.189	1.2719	Q9BZK7	18	18	12	F-box-like/WD repeat-containing protein TBL1XR1	TBL1XR1	sp|Q9BZK7|TBL1R_HUMAN F-box-like/WD repeat-containing protein TBL1XR1 OS=Homo sapiens OX=9606 GN=TBL1XR1 PE=1 SV=1	1	18	18	12	8	9	10	10	6	8	11	11	11	11	8	9	10	10	6	8	11	11	11	11	6	6	7	7	6	7
Q9UHD2	Serine/threonine-protein kinase TBK1	TBK1	1.2435	0.82475	0.89185	1.0384	0.90494	0.90939	1.0922	0.97685	0.83923	0.99771	Q9UHD2	17	17	17	Serine/threonine-protein kinase TBK1	TBK1	sp|Q9UHD2|TBK1_HUMAN Serine/threonine-protein kinase TBK1 OS=Homo sapiens OX=9606 GN=TBK1 PE=1 SV=1	1	17	17	17	7	7	6	7	6	5	5	9	5	8	7	7	6	7	6	5	5	9	5	8	7	7	6	7	6	5
Q15813	Tubulin-specific chaperone E	TBCE	1.0394	0.98133	0.99381	0.96157	1.0054	0.90612	0.98635	1.0434	0.87682	0.89472	Q15813	15	14	14	Tubulin-specific chaperone E	TBCE	sp|Q15813|TBCE_HUMAN Tubulin-specific chaperone E OS=Homo sapiens OX=9606 GN=TBCE PE=1 SV=1	1	15	14	14	8	7	9	7	5	3	4	6	7	7	7	6	8	6	5	3	4	6	6	6	7	6	8	6	5	3
Q9BTW9	Tubulin-specific chaperone D	TBCD	0.98876	0.98288	1.0013	1.0084	1.0111	1.0688	1.068	1.1162	0.69479	0.72632	Q9BTW9	35	35	35	Tubulin-specific chaperone D	TBCD	sp|Q9BTW9|TBCD_HUMAN Tubulin-specific chaperone D OS=Homo sapiens OX=9606 GN=TBCD PE=1 SV=2	1	35	35	35	19	17	16	20	16	18	14	16	18	20	19	17	16	20	16	18	14	16	18	20	19	17	16	20	16	18
Q15814	Tubulin-specific chaperone C	TBCC	0.69426	0.76416	1.0674	0.94239	0.88703	0.37814	0.65009	0.63268	0.24176	1.2119	Q15814	9	9	9	Tubulin-specific chaperone C	TBCC	sp|Q15814|TBCC_HUMAN Tubulin-specific chaperone C OS=Homo sapiens OX=9606 GN=TBCC PE=1 SV=2	1	9	9	9	2	4	7	6	1	1	3	2	6	6	2	4	7	6	1	1	3	2	6	6	2	4	7	6	1	1
Q99426	Tubulin-folding cofactor B	TBCB	0.96881	1.0347	1.0163	1.0494	1.0635	0.9659	1.1102	1.0765	1.1575	1.1424	Q99426	16	16	16	Tubulin-folding cofactor B	TBCB	sp|Q99426|TBCB_HUMAN Tubulin-folding cofactor B OS=Homo sapiens OX=9606 GN=TBCB PE=1 SV=2	1	16	16	16	8	9	9	8	10	10	10	8	8	10	8	9	9	8	10	10	10	8	8	10	8	9	9	8	10	10
O75347	Tubulin-specific chaperone A	TBCA	0.95908	0.9779	1.037	0.93737	0.89113	0.94522	1.0674	1.0796	1.1338	1.1115	O75347	16	16	16	Tubulin-specific chaperone A	TBCA	sp|O75347|TBCA_HUMAN Tubulin-specific chaperone A OS=Homo sapiens OX=9606 GN=TBCA PE=1 SV=3	1	16	16	16	8	10	10	10	11	10	9	10	11	9	8	10	10	10	11	10	9	10	11	9	8	10	10	10	11	10
Q66K14	TBC1 domain family member 9B	TBC1D9B	0.95166	0.73909	0.84246	0.95657	0.90554	0.92022	1.7971	1.2862	0.97427	NaN	Q66K14	5	5	5	TBC1 domain family member 9B	TBC1D9B	sp|Q66K14|TBC9B_HUMAN TBC1 domain family member 9B OS=Homo sapiens OX=9606 GN=TBC1D9B PE=1 SV=3	1	5	5	5	2	1	1	1	2	2	1	1	1	1	2	1	1	1	2	2	1	1	1	1	2	1	1	1	2	2
Q92609	TBC1 domain family member 5	TBC1D5	1.0236	1.0098	1.013	1.3869	0.98108	1.147	1.9711	1.645	NaN	0.97437	Q92609	6	6	6	TBC1 domain family member 5	TBC1D5	sp|Q92609|TBCD5_HUMAN TBC1 domain family member 5 OS=Homo sapiens OX=9606 GN=TBC1D5 PE=1 SV=1	1	6	6	6	3	1	2	2	0	1	3	2	2	3	3	1	2	2	0	1	3	2	2	3	3	1	2	2	0	1
O60343	TBC1 domain family member 4	TBC1D4	1.1265	1.0531	1.1373	1.0413	1.0372	1.1749	1.3746	1.1065	1.0721	0.84055	O60343	19	19	17	TBC1 domain family member 4	TBC1D4	sp|O60343|TBCD4_HUMAN TBC1 domain family member 4 OS=Homo sapiens OX=9606 GN=TBC1D4 PE=1 SV=2	1	19	19	17	9	8	7	12	8	6	8	10	4	8	9	8	7	12	8	6	8	10	4	8	8	7	5	10	8	6
Q9ULP9;H3BQ06	TBC1 domain family member 24	TBC1D24	1.1363	1.2679	1.2097	0.87094	1.434	1.075	1.3517	0.9412	NaN	NaN	Q9ULP9;H3BQ06	4;3	4;3	4;3	TBC1 domain family member 24	TBC1D24	sp|Q9ULP9|TBC24_HUMAN TBC1 domain family member 24 OS=Homo sapiens OX=9606 GN=TBC1D24 PE=1 SV=2;tr|H3BQ06|H3BQ06_HUMAN Uncharacterized protein OS=Homo sapiens OX=9606 PE=4 SV=1	2	4	4	4	3	2	1	2	0	0	2	3	1	2	3	2	1	2	0	0	2	3	1	2	3	2	1	2	0	0
Q9NUY8	TBC1 domain family member 23	TBC1D23	0.77857	0.82098	0.64532	0.91015	0.90706	0.93491	0.83388	1.1016	NaN	NaN	Q9NUY8	5	5	5	TBC1 domain family member 23	TBC1D23	sp|Q9NUY8|TBC23_HUMAN TBC1 domain family member 23 OS=Homo sapiens OX=9606 GN=TBC1D23 PE=1 SV=3	1	5	5	5	3	3	4	2	0	0	2	2	3	1	3	3	4	2	0	0	2	2	3	1	3	3	4	2	0	0
Q9BYX2	TBC1 domain family member 2A	TBC1D2	NaN	0.91054	NaN	0.9822	0.96711	NaN	NaN	NaN	NaN	NaN	Q9BYX2	2	2	2	TBC1 domain family member 2A	TBC1D2	sp|Q9BYX2|TBD2A_HUMAN TBC1 domain family member 2A OS=Homo sapiens OX=9606 GN=TBC1D2 PE=1 SV=3	1	2	2	2	1	2	0	0	0	0	1	0	0	1	1	2	0	0	0	0	1	0	0	1	1	2	0	0	0	0
Q8TC07	TBC1 domain family member 15	TBC1D15	0.90267	1.0867	1.0119	0.87688	1.135	0.93019	0.88961	0.97132	1.0921	0.99521	Q8TC07	13	13	13	TBC1 domain family member 15	TBC1D15	sp|Q8TC07|TBC15_HUMAN TBC1 domain family member 15 OS=Homo sapiens OX=9606 GN=TBC1D15 PE=1 SV=2	1	13	13	13	7	10	8	9	3	3	8	7	5	6	7	10	8	9	3	3	8	7	5	6	7	10	8	9	3	3
Q4KMP7	TBC1 domain family member 10B	TBC1D10B	1.1177	0.97504	1.2697	0.92273	0.93379	0.94524	0.9172	1.0387	0.82024	NaN	Q4KMP7	15	15	15	TBC1 domain family member 10B	TBC1D10B	sp|Q4KMP7|TB10B_HUMAN TBC1 domain family member 10B OS=Homo sapiens OX=9606 GN=TBC1D10B PE=1 SV=3	1	15	15	15	8	9	7	7	5	2	8	8	12	8	8	9	7	7	5	2	8	8	12	8	8	9	7	7	5	2
O14907	Tax1-binding protein 3	TAX1BP3	1.096	1.0567	0.99339	1.0501	1.0985	1.1997	1.0551	1.0411	NaN	NaN	O14907	3	3	3	Tax1-binding protein 3	TAX1BP3	sp|O14907|TX1B3_HUMAN Tax1-binding protein 3 OS=Homo sapiens OX=9606 GN=TAX1BP3 PE=1 SV=2	1	3	3	3	3	2	3	3	0	0	2	3	2	1	3	2	3	3	0	0	2	3	2	1	3	2	3	3	0	0
Q6P1N9	Putative deoxyribonuclease TATDN1	TATDN1	0.96926	0.93357	1.005	1.072	0.97802	1.1435	0.91994	0.87684	1.2094	1.048	Q6P1N9	12	12	12	Putative deoxyribonuclease TATDN1	TATDN1	sp|Q6P1N9|TATD1_HUMAN Putative deoxyribonuclease TATDN1 OS=Homo sapiens OX=9606 GN=TATDN1 PE=1 SV=2	1	12	12	12	6	5	5	6	3	1	6	7	9	5	6	5	5	6	3	1	6	7	9	5	6	5	5	6	3	1
A2RTX5	Probable threonine--tRNA ligase 2, cytoplasmic	TARSL2	NaN	0.3878	0.65574	0.63184	0.65707	NaN	1.2402	NaN	NaN	NaN	A2RTX5	5	2	2	Probable threonine--tRNA ligase 2, cytoplasmic	TARSL2	sp|A2RTX5|SYTC2_HUMAN Probable threonine--tRNA ligase 2, cytoplasmic OS=Homo sapiens OX=9606 GN=TARSL2 PE=1 SV=1	1	5	2	2	1	2	3	2	4	0	2	2	1	2	1	1	2	0	1	0	1	1	0	1	1	1	2	0	1	0
P26639	Threonine--tRNA ligase, cytoplasmic	TARS	1.0073	1.0881	0.98011	1.0103	1.0307	1.0304	1.1074	1.1218	0.92361	0.95241	P26639	45	45	42	Threonine--tRNA ligase, cytoplasmic	TARS	sp|P26639|SYTC_HUMAN Threonine--tRNA ligase, cytoplasmic OS=Homo sapiens OX=9606 GN=TARS PE=1 SV=3	1	45	45	42	29	29	30	29	29	22	30	27	28	29	29	29	30	29	29	22	30	27	28	29	29	28	29	27	26	22
Q13148	TAR DNA-binding protein 43	TARDBP	1.0353	1.0619	0.95555	1.0546	1.0704	1.0701	1.0054	0.99152	1.1434	1.088	Q13148	14	14	14	TAR DNA-binding protein 43	TARDBP	sp|Q13148|TADBP_HUMAN TAR DNA-binding protein 43 OS=Homo sapiens OX=9606 GN=TARDBP PE=1 SV=1	1	14	14	14	9	9	9	9	11	12	9	8	11	9	9	9	9	9	11	12	9	8	11	9	9	9	9	9	11	12
Q6NXT6	Transmembrane anterior posterior transformation protein 1 homolog	TAPT1	NaN	NaN	1.0832	1.0355	NaN	NaN	NaN	NaN	NaN	NaN	Q6NXT6	1	1	1	Transmembrane anterior posterior transformation protein 1 homolog	TAPT1	sp|Q6NXT6|TAPT1_HUMAN Transmembrane anterior posterior transformation protein 1 homolog OS=Homo sapiens OX=9606 GN=TAPT1 PE=1 SV=1	1	1	1	1	1	1	0	1	0	0	0	0	0	0	1	1	0	1	0	0	0	0	0	0	1	1	0	1	0	0
O15533	Tapasin	TAPBP	1.1753	1.0162	1.0453	1.0646	1.2654	1.1807	2.1599	2.0932	NaN	NaN	O15533	6	6	6	Tapasin	TAPBP	sp|O15533|TPSN_HUMAN Tapasin OS=Homo sapiens OX=9606 GN=TAPBP PE=1 SV=1	1	6	6	6	4	3	4	3	0	0	3	3	2	2	4	3	4	3	0	0	3	3	2	2	4	3	4	3	0	0
Q03519;E7ENX8	Antigen peptide transporter 2	TAP2	NaN	NaN	0.81895	0.90047	NaN	NaN	2.0607	2.2699	0.50062	NaN	Q03519;E7ENX8	3;2	2;2	2;2	Antigen peptide transporter 2	TAP2	sp|Q03519|TAP2_HUMAN Antigen peptide transporter 2 OS=Homo sapiens OX=9606 GN=TAP2 PE=1 SV=1;tr|E7ENX8|E7ENX8_HUMAN Uncharacterized protein (Fragment) OS=Homo sapiens OX=9606 PE=3 SV=1	2	3	2	2	2	1	1	1	1	0	0	0	0	0	1	1	1	1	1	0	0	0	0	0	1	1	1	1	1	0
Q03518	Antigen peptide transporter 1	TAP1	NaN	0.79132	0.98124	0.6936	1.0317	1.156	1.0106	1.4117	0.96284	0.98338	Q03518	3	3	3	Antigen peptide transporter 1	TAP1	sp|Q03518|TAP1_HUMAN Antigen peptide transporter 1 OS=Homo sapiens OX=9606 GN=TAP1 PE=1 SV=2	1	3	3	3	1	2	2	1	2	1	2	1	0	1	1	2	2	1	2	1	2	1	0	1	1	2	2	1	2	1
Q9UL54	Serine/threonine-protein kinase TAO2	TAOK2	NaN	NaN	NaN	1.2541	NaN	1.0221	NaN	0.92053	0.90273	1.3074	Q9UL54	3	3	3	Serine/threonine-protein kinase TAO2	TAOK2	sp|Q9UL54|TAOK2_HUMAN Serine/threonine-protein kinase TAO2 OS=Homo sapiens OX=9606 GN=TAOK2 PE=1 SV=2	1	3	3	3	0	1	0	1	1	3	0	2	0	0	0	1	0	1	1	3	0	2	0	0	0	1	0	1	1	3
Q7L7X3	Serine/threonine-protein kinase TAO1	TAOK1	0.79627	0.79388	0.94842	0.96783	1.0895	1.0926	1.0196	1.1296	0.77699	1.3267	Q7L7X3	4	4	4	Serine/threonine-protein kinase TAO1	TAOK1	sp|Q7L7X3|TAOK1_HUMAN Serine/threonine-protein kinase TAO1 OS=Homo sapiens OX=9606 GN=TAOK1 PE=1 SV=1	1	4	4	4	3	2	3	2	1	2	2	3	2	3	3	2	3	2	1	2	2	3	2	3	3	2	3	2	1	2
Q92844	TRAF family member-associated NF-kappa-B activator	TANK	0.95424	1.0456	1.0111	1.0051	1.1209	1.0886	1.6898	1.6643	NaN	NaN	Q92844	4	4	4	TRAF family member-associated NF-kappa-B activator	TANK	sp|Q92844|TANK_HUMAN TRAF family member-associated NF-kappa-B activator OS=Homo sapiens OX=9606 GN=TANK PE=1 SV=2	1	4	4	4	3	2	3	1	0	0	2	2	1	1	3	2	3	1	0	0	2	2	1	1	3	2	3	1	0	0
Q9C0B7	Transport and Golgi organization protein 6 homolog	TANGO6	NaN	NaN	NaN	0.99951	1.059	NaN	NaN	NaN	1.3762	NaN	Q9C0B7	3	3	3	Transport and Golgi organization protein 6 homolog	TANGO6	sp|Q9C0B7|TNG6_HUMAN Transport and Golgi organization protein 6 homolog OS=Homo sapiens OX=9606 GN=TANGO6 PE=1 SV=2	1	3	3	3	0	1	1	1	1	1	1	0	0	0	0	1	1	1	1	1	1	0	0	0	0	1	1	1	1	1
Q9HCD6	Protein TANC2	TANC2	0.46395	1.0242	1.1342	1.1477	1.1213	0.79013	0.68716	1.1147	NaN	1.0331	Q9HCD6	6	6	6	Protein TANC2	TANC2	sp|Q9HCD6|TANC2_HUMAN Protein TANC2 OS=Homo sapiens OX=9606 GN=TANC2 PE=1 SV=3	1	6	6	6	3	2	2	4	1	1	3	2	2	1	3	2	2	4	1	1	3	2	2	1	3	2	2	4	1	1
Q9C0D5	Protein TANC1	TANC1	1.0105	0.99269	0.99478	0.95182	1.0365	0.9127	0.84338	0.84106	NaN	NaN	Q9C0D5	2	2	2	Protein TANC1	TANC1	sp|Q9C0D5|TANC1_HUMAN Protein TANC1 OS=Homo sapiens OX=9606 GN=TANC1 PE=1 SV=3	1	2	2	2	2	2	2	2	0	0	2	1	2	2	2	2	2	2	0	0	2	1	2	2	2	2	2	2	0	0
Q96BW9	Phosphatidate cytidylyltransferase, mitochondrial	TAMM41	1.163	0.95021	1.6549	1.1729	1.3246	1.2785	1.1857	1.1717	1.081	1.0841	Q96BW9	3	3	3	Phosphatidate cytidylyltransferase, mitochondrial	TAMM41	sp|Q96BW9|TAM41_HUMAN Phosphatidate cytidylyltransferase, mitochondrial OS=Homo sapiens OX=9606 GN=TAMM41 PE=1 SV=2	1	3	3	3	3	1	2	1	1	1	2	2	2	1	3	1	2	1	1	1	2	2	2	1	3	1	2	1	1	1
P37837	Transaldolase	TALDO1	1.0076	1.0051	1.0319	1.0381	1.047	1.0482	0.85532	0.86991	1.0022	1.0629	P37837	30	30	30	Transaldolase	TALDO1	sp|P37837|TALDO_HUMAN Transaldolase OS=Homo sapiens OX=9606 GN=TALDO1 PE=1 SV=2	1	30	30	30	15	16	15	16	19	24	18	18	16	16	15	16	15	16	19	24	18	18	16	16	15	16	15	16	19	24
Q9UI15	Transgelin-3	TAGLN3	NaN	NaN	1.2151	NaN	0.99526	1.4888	NaN	NaN	NaN	NaN	Q9UI15	2	1	1	Transgelin-3	TAGLN3	sp|Q9UI15|TAGL3_HUMAN Transgelin-3 OS=Homo sapiens OX=9606 GN=TAGLN3 PE=1 SV=2	1	2	1	1	2	1	1	1	1	1	2	2	1	1	1	0	0	0	0	0	1	1	0	0	1	0	0	0	0	0
P37802	Transgelin-2	TAGLN2	1.0122	0.98349	1.1074	1.0316	1.1221	1.1788	1.7737	1.7767	1.3518	1.3677	P37802	16	16	15	Transgelin-2	TAGLN2	sp|P37802|TAGL2_HUMAN Transgelin-2 OS=Homo sapiens OX=9606 GN=TAGLN2 PE=1 SV=3	1	16	16	15	11	12	9	11	13	15	11	11	11	10	11	12	9	11	13	15	11	11	11	10	10	11	8	10	12	14
Q01995	Transgelin	TAGLN	NaN	NaN	NaN	NaN	1.5703	1.5506	NaN	NaN	0.34336	0.48226	Q01995	10	10	10	Transgelin	TAGLN	sp|Q01995|TAGL_HUMAN Transgelin OS=Homo sapiens OX=9606 GN=TAGLN PE=1 SV=4	1	10	10	10	0	0	0	0	4	2	5	7	0	0	0	0	0	0	4	2	5	7	0	0	0	0	0	0	4	2
Q16594	Transcription initiation factor TFIID subunit 9	TAF9	0.99372	1.0381	1.1069	0.8395	0.80096	0.98919	0.88782	0.87243	NaN	NaN	Q16594	5	5	3	Transcription initiation factor TFIID subunit 9	TAF9	sp|Q16594|TAF9_HUMAN Transcription initiation factor TFIID subunit 9 OS=Homo sapiens OX=9606 GN=TAF9 PE=1 SV=1	1	5	5	3	2	3	2	2	0	1	2	2	2	2	2	3	2	2	0	1	2	2	2	2	1	1	1	1	0	1
Q7Z7C8	Transcription initiation factor TFIID subunit 8	TAF8	NaN	NaN	NaN	NaN	NaN	NaN	NaN	NaN	0.9998	1.0798	Q7Z7C8	2	2	2	Transcription initiation factor TFIID subunit 8	TAF8	sp|Q7Z7C8|TAF8_HUMAN Transcription initiation factor TFIID subunit 8 OS=Homo sapiens OX=9606 GN=TAF8 PE=1 SV=1	1	2	2	2	1	0	0	1	1	2	1	1	0	0	1	0	0	1	1	2	1	1	0	0	1	0	0	1	1	2
P49848	Transcription initiation factor TFIID subunit 6	TAF6	1.0599	1.0974	0.72011	0.93477	1.147	1.1771	0.86619	1.1842	1.0934	0.84005	P49848	8	8	8	Transcription initiation factor TFIID subunit 6	TAF6	sp|P49848|TAF6_HUMAN Transcription initiation factor TFIID subunit 6 OS=Homo sapiens OX=9606 GN=TAF6 PE=1 SV=1	1	8	8	8	3	1	2	2	6	4	3	4	3	3	3	1	2	2	6	4	3	4	3	3	3	1	2	2	6	4
Q15542	Transcription initiation factor TFIID subunit 5	TAF5	0.71797	1.1712	0.91401	0.79179	1.0581	0.88465	0.9958	0.77096	NaN	NaN	Q15542	6	6	6	Transcription initiation factor TFIID subunit 5	TAF5	sp|Q15542|TAF5_HUMAN Transcription initiation factor TFIID subunit 5 OS=Homo sapiens OX=9606 GN=TAF5 PE=1 SV=3	1	6	6	6	3	1	2	1	0	0	3	3	3	2	3	1	2	1	0	0	3	3	3	2	3	1	2	1	0	0
O00268	Transcription initiation factor TFIID subunit 4	TAF4	0.95208	1.0992	1.1917	1.084	1.0728	1.112	1.0879	1.0236	1.2032	1.1492	O00268	7	7	7	Transcription initiation factor TFIID subunit 4	TAF4	sp|O00268|TAF4_HUMAN Transcription initiation factor TFIID subunit 4 OS=Homo sapiens OX=9606 GN=TAF4 PE=1 SV=2	1	7	7	7	4	3	4	3	4	4	2	3	2	3	4	3	4	3	4	4	2	3	2	3	4	3	4	3	4	4
Q6P1X5	Transcription initiation factor TFIID subunit 2	TAF2	1.1365	1.1364	0.91513	1.0743	0.96647	0.81527	0.92105	0.95149	NaN	0.87767	Q6P1X5	10	10	10	Transcription initiation factor TFIID subunit 2	TAF2	sp|Q6P1X5|TAF2_HUMAN Transcription initiation factor TFIID subunit 2 OS=Homo sapiens OX=9606 GN=TAF2 PE=1 SV=3	1	10	10	10	3	3	6	3	1	2	5	4	6	4	3	3	6	3	1	2	5	4	6	4	3	3	6	3	1	2
Q92804	TATA-binding protein-associated factor 2N	TAF15	1.0579	0.98955	0.95537	0.86535	0.88967	0.97945	1.0207	1.0325	0.81377	0.88512	Q92804	17	14	14	TATA-binding protein-associated factor 2N	TAF15	sp|Q92804|RBP56_HUMAN TATA-binding protein-associated factor 2N OS=Homo sapiens OX=9606 GN=TAF15 PE=1 SV=1	1	17	14	14	11	10	12	10	6	6	12	11	13	12	9	8	9	8	4	4	9	8	10	9	9	8	9	8	4	4
Q16514	Transcription initiation factor TFIID subunit 12	TAF12	0.77694	NaN	NaN	NaN	NaN	NaN	NaN	NaN	NaN	NaN	Q16514	1	1	1	Transcription initiation factor TFIID subunit 12	TAF12	sp|Q16514|TAF12_HUMAN Transcription initiation factor TFIID subunit 12 OS=Homo sapiens OX=9606 GN=TAF12 PE=1 SV=1	1	1	1	1	0	0	0	0	0	0	0	0	1	0	0	0	0	0	0	0	0	0	1	0	0	0	0	0	0	0
Q12962	Transcription initiation factor TFIID subunit 10	TAF10	0.92981	0.92168	0.91584	0.96618	0.86755	0.85249	0.85219	0.93295	1.1092	0.98399	Q12962	4	4	4	Transcription initiation factor TFIID subunit 10	TAF10	sp|Q12962|TAF10_HUMAN Transcription initiation factor TFIID subunit 10 OS=Homo sapiens OX=9606 GN=TAF10 PE=1 SV=1	1	4	4	4	4	2	3	3	2	3	3	3	3	3	4	2	3	3	2	3	3	3	3	3	4	2	3	3	2	3
P21675;Q8IZX4	Transcription initiation factor TFIID subunit 1;Transcription initiation factor TFIID subunit 1-like	TAF1;TAF1L	1.0715	0.8543	0.87865	0.97112	0.85675	0.80826	0.86866	NaN	NaN	NaN	P21675;Q8IZX4	5;3	5;3	5;3	Transcription initiation factor TFIID subunit 1;Transcription initiation factor TFIID subunit 1-like	TAF1;TAF1L	sp|P21675|TAF1_HUMAN Transcription initiation factor TFIID subunit 1 OS=Homo sapiens OX=9606 GN=TAF1 PE=1 SV=2;sp|Q8IZX4|TAF1L_HUMAN Transcription initiation factor TFIID subunit 1-like OS=Homo sapiens OX=9606 GN=TAF1L PE=1 SV=1	2	5	5	5	4	2	2	2	0	1	1	2	2	2	4	2	2	2	0	1	1	2	2	2	4	2	2	2	0	1
O75528	Transcriptional adapter 3	TADA3	1.1063	1.3785	NaN	0.61272	0.671	0.63218	0.71282	NaN	NaN	1.1503	O75528	2	2	2	Transcriptional adapter 3	TADA3	sp|O75528|TADA3_HUMAN Transcriptional adapter 3 OS=Homo sapiens OX=9606 GN=TADA3 PE=1 SV=1	1	2	2	2	1	1	1	0	0	1	1	1	1	1	1	1	1	0	0	1	1	1	1	1	1	1	1	0	0	1
Q96BN2	Transcriptional adapter 1	TADA1	0.99926	1.0206	0.91948	0.90959	0.94951	0.99917	0.9066	0.85632	NaN	NaN	Q96BN2	1	1	1	Transcriptional adapter 1	TADA1	sp|Q96BN2|TADA1_HUMAN Transcriptional adapter 1 OS=Homo sapiens OX=9606 GN=TADA1 PE=1 SV=1	1	1	1	1	1	1	1	1	0	0	1	1	1	1	1	1	1	1	0	0	1	1	1	1	1	1	1	1	0	0
P09758	Tumor-associated calcium signal transducer 2	TACSTD2	NaN	NaN	0.98809	0.87871	NaN	NaN	5.6722	5.6743	NaN	NaN	P09758	4	4	4	Tumor-associated calcium signal transducer 2	TACSTD2	sp|P09758|TACD2_HUMAN Tumor-associated calcium signal transducer 2 OS=Homo sapiens OX=9606 GN=TACSTD2 PE=1 SV=3	1	4	4	4	4	4	3	2	0	0	0	0	0	0	4	4	3	2	0	0	0	0	0	0	4	4	3	2	0	0
Q9BSH4	Translational activator of cytochrome c oxidase 1	TACO1	0.74537	1.0423	0.46351	0.64351	0.4371	0.60519	0.81574	0.64362	0.92535	0.89702	Q9BSH4	6	6	6	Translational activator of cytochrome c oxidase 1	TACO1	sp|Q9BSH4|TACO1_HUMAN Translational activator of cytochrome c oxidase 1 OS=Homo sapiens OX=9606 GN=TACO1 PE=1 SV=1	1	6	6	6	4	3	4	4	3	4	3	4	3	4	4	3	4	4	3	4	3	4	3	4	4	3	4	4	3	4
Q9Y6A5	Transforming acidic coiled-coil-containing protein 3	TACC3	0.87839	0.9278	0.88189	0.96365	0.88134	0.91937	1.4018	1.4376	NaN	1.2073	Q9Y6A5	17	17	17	Transforming acidic coiled-coil-containing protein 3	TACC3	sp|Q9Y6A5|TACC3_HUMAN Transforming acidic coiled-coil-containing protein 3 OS=Homo sapiens OX=9606 GN=TACC3 PE=1 SV=1	1	17	17	17	10	13	9	7	1	2	12	13	7	7	10	13	9	7	1	2	12	13	7	7	10	13	9	7	1	2
O95359	Transforming acidic coiled-coil-containing protein 2	TACC2	0.89272	0.95425	NaN	NaN	0.93733	0.87533	0.74937	0.97648	NaN	NaN	O95359	5	3	3	Transforming acidic coiled-coil-containing protein 2	TACC2	sp|O95359|TACC2_HUMAN Transforming acidic coiled-coil-containing protein 2 OS=Homo sapiens OX=9606 GN=TACC2 PE=1 SV=3	1	5	3	3	0	1	1	2	0	0	3	2	4	2	0	0	1	1	0	0	2	1	2	1	0	0	1	1	0	0
O75410	Transforming acidic coiled-coil-containing protein 1	TACC1	1.1307	0.99635	0.96051	1.044	0.69988	0.83021	0.97158	1.1995	0.41014	NaN	O75410	12	12	10	Transforming acidic coiled-coil-containing protein 1	TACC1	sp|O75410|TACC1_HUMAN Transforming acidic coiled-coil-containing protein 1 OS=Homo sapiens OX=9606 GN=TACC1 PE=1 SV=2	1	12	12	10	3	5	3	3	3	2	2	2	5	3	3	5	3	3	3	2	2	2	5	3	3	4	3	2	3	2
Q9NYJ8	TGF-beta-activated kinase 1 and MAP3K7-binding protein 2	TAB2	1.1629	1.0935	1.2587	NaN	NaN	1.3105	1.3441	1.2232	NaN	0.77045	Q9NYJ8	4	4	4	TGF-beta-activated kinase 1 and MAP3K7-binding protein 2	TAB2	sp|Q9NYJ8|TAB2_HUMAN TGF-beta-activated kinase 1 and MAP3K7-binding protein 2 OS=Homo sapiens OX=9606 GN=TAB2 PE=1 SV=1	1	4	4	4	1	0	1	1	2	2	0	1	2	1	1	0	1	1	2	2	0	1	2	1	1	0	1	1	2	2
Q15750	TGF-beta-activated kinase 1 and MAP3K7-binding protein 1	TAB1	0.8797	0.69429	0.8478	0.97989	0.98073	0.85948	0.93624	0.84583	0.95566	0.97923	Q15750	7	7	7	TGF-beta-activated kinase 1 and MAP3K7-binding protein 1	TAB1	sp|Q15750|TAB1_HUMAN TGF-beta-activated kinase 1 and MAP3K7-binding protein 1 OS=Homo sapiens OX=9606 GN=TAB1 PE=1 SV=1	1	7	7	7	3	4	4	3	1	2	4	6	2	4	3	4	4	3	1	2	4	6	2	4	3	4	4	3	1	2
Q7Z422	SUZ domain-containing protein 1	SZRD1	0.93013	0.85624	1.0104	0.81704	0.72483	0.79848	0.75076	0.82193	NaN	NaN	Q7Z422	5	5	5	SUZ domain-containing protein 1	SZRD1	sp|Q7Z422|SZRD1_HUMAN SUZ domain-containing protein 1 OS=Homo sapiens OX=9606 GN=SZRD1 PE=1 SV=1	1	5	5	5	4	3	5	3	0	1	2	3	4	4	4	3	5	3	0	1	2	3	4	4	4	3	5	3	0	1
Q86TM6	E3 ubiquitin-protein ligase synoviolin	SYVN1	NaN	0.66684	0.4431	0.85085	NaN	NaN	0.6699	0.61446	NaN	1.2314	Q86TM6	2	2	2	E3 ubiquitin-protein ligase synoviolin	SYVN1	sp|Q86TM6|SYVN1_HUMAN E3 ubiquitin-protein ligase synoviolin OS=Homo sapiens OX=9606 GN=SYVN1 PE=1 SV=2	1	2	2	2	1	1	1	1	1	1	0	0	0	1	1	1	1	1	1	1	0	0	0	1	1	1	1	1	1	1
P21579	Synaptotagmin-1	SYT1	1.0143	NaN	NaN	1.1156	1.2502	1.0576	NaN	NaN	NaN	0.51656	P21579	2	2	2	Synaptotagmin-1	SYT1	sp|P21579|SYT1_HUMAN Synaptotagmin-1 OS=Homo sapiens OX=9606 GN=SYT1 PE=1 SV=1	1	2	2	2	0	1	0	0	1	1	1	1	1	0	0	1	0	0	1	1	1	1	1	0	0	1	0	0	1	1
Q16563	Synaptophysin-like protein 1	SYPL1	0.04035	5.6969	NaN	NaN	4.5577	NaN	1.8798	NaN	0.96082	0.94756	Q16563	3	3	3	Synaptophysin-like protein 1	SYPL1	sp|Q16563|SYPL1_HUMAN Synaptophysin-like protein 1 OS=Homo sapiens OX=9606 GN=SYPL1 PE=1 SV=1	1	3	3	3	1	1	3	1	2	3	2	1	2	2	1	1	3	1	2	3	2	1	2	2	1	1	3	1	2	3
A0A087WUM0;P57105	Synaptojanin-2-binding protein	SYNJ2BP-COX16;SYNJ2BP	1.049	1.0292	1.0062	0.99927	1.0728	1.1121	1.4052	1.2249	0.87517	0.86787	A0A087WUM0;P57105	7;6	7;6	6;6	Synaptojanin-2-binding protein	SYNJ2BP-COX16;SYNJ2BP	tr|A0A087WUM0|A0A087WUM0_HUMAN SYNJ2BP-COX16 readthrough (Fragment) OS=Homo sapiens OX=9606 GN=SYNJ2BP-COX16 PE=4 SV=1;sp|P57105|SYJ2B_HUMAN Synaptojanin-2-binding protein OS=Homo sapiens OX=9606 GN=SYNJ2BP PE=1 SV=2	2	7	7	6	5	5	6	4	3	3	6	5	4	5	5	5	6	4	3	3	6	5	4	5	5	5	5	3	3	3
O43760	Synaptogyrin-2	SYNGR2	1.0275	0.99958	1.0006	0.92431	0.96102	1.5285	0.98562	0.96633	0.84574	0.79555	O43760	5	5	5	Synaptogyrin-2	SYNGR2	sp|O43760|SNG2_HUMAN Synaptogyrin-2 OS=Homo sapiens OX=9606 GN=SYNGR2 PE=1 SV=1	1	5	5	5	3	3	3	3	4	4	3	3	3	3	3	3	3	3	4	4	3	3	3	3	3	3	3	3	4	4
Q8WXH0	Nesprin-2	SYNE2	NaN	NaN	1.1616	1.2069	1.2395	1.5272	2.5869	3.7144	1.058	0.13359	Q8WXH0	10	10	10	Nesprin-2	SYNE2	sp|Q8WXH0|SYNE2_HUMAN Nesprin-2 OS=Homo sapiens OX=9606 GN=SYNE2 PE=1 SV=3	1	10	10	10	3	1	2	1	5	3	3	3	0	0	3	1	2	1	5	3	3	3	0	0	3	1	2	1	5	3
O60506	Heterogeneous nuclear ribonucleoprotein Q	SYNCRIP	1.0076	1.0157	1.008	0.98737	1.0477	1.0372	1.7104	1.6692	1.0927	1.0622	O60506	46	46	40	Heterogeneous nuclear ribonucleoprotein Q	SYNCRIP	sp|O60506|HNRPQ_HUMAN Heterogeneous nuclear ribonucleoprotein Q OS=Homo sapiens OX=9606 GN=SYNCRIP PE=1 SV=2	1	46	46	40	26	28	26	25	43	40	27	27	25	26	26	28	26	25	43	40	27	27	25	26	21	23	21	20	37	34
Q92797	Symplekin	SYMPK	0.98366	0.9784	0.95407	1.032	0.94165	1.0057	0.88073	0.84238	0.99635	1.0794	Q92797	38	38	38	Symplekin	SYMPK	sp|Q92797|SYMPK_HUMAN Symplekin OS=Homo sapiens OX=9606 GN=SYMPK PE=1 SV=2	1	38	38	38	21	20	28	23	10	13	20	22	25	23	21	20	28	23	10	13	20	22	25	23	21	20	28	23	10	13
P43405	Tyrosine-protein kinase SYK	SYK	0.86878	0.93056	0.96717	0.9191	0.82963	0.75196	0.97824	0.99026	1.0451	1.0508	P43405	3	3	3	Tyrosine-protein kinase SYK	SYK	sp|P43405|KSYK_HUMAN Tyrosine-protein kinase SYK OS=Homo sapiens OX=9606 GN=SYK PE=1 SV=1	1	3	3	3	2	1	1	2	2	1	2	1	2	2	2	1	1	2	2	1	2	1	2	2	2	1	1	2	2	1
O95926	Pre-mRNA-splicing factor SYF2	SYF2	1.0304	0.94907	1.017	0.89916	0.83734	0.9412	0.99856	1.0262	0.89692	0.90078	O95926	6	6	6	Pre-mRNA-splicing factor SYF2	SYF2	sp|O95926|SYF2_HUMAN Pre-mRNA-splicing factor SYF2 OS=Homo sapiens OX=9606 GN=SYF2 PE=1 SV=1	1	6	6	6	4	3	3	3	1	1	3	2	5	3	4	3	3	3	1	1	3	2	5	3	4	3	3	3	1	1
Q96A49	Synapse-associated protein 1	SYAP1	0.90747	0.9572	0.95056	0.85511	0.92862	0.93461	0.94995	0.89895	1.0397	1.0498	Q96A49	16	16	16	Synapse-associated protein 1	SYAP1	sp|Q96A49|SYAP1_HUMAN Synapse-associated protein 1 OS=Homo sapiens OX=9606 GN=SYAP1 PE=1 SV=1	1	16	16	16	9	9	10	9	4	4	9	11	11	9	9	9	10	9	4	4	9	11	11	9	9	9	10	9	4	4
Q9UH65	Switch-associated protein 70	SWAP70	1.2701	1.0524	0.97577	1.0269	NaN	NaN	1.1443	1.0346	NaN	1.7196	Q9UH65	6	6	6	Switch-associated protein 70	SWAP70	sp|Q9UH65|SWP70_HUMAN Switch-associated protein 70 OS=Homo sapiens OX=9606 GN=SWAP70 PE=1 SV=1	1	6	6	6	4	3	3	1	0	2	0	0	3	2	4	3	3	1	0	2	0	0	3	2	4	3	3	1	0	2
O95425	Supervillin	SVIL	0.57915	1.0107	0.94149	1.0061	1.2141	1.0506	1.1319	NaN	NaN	NaN	O95425	7	7	7	Supervillin	SVIL	sp|O95425|SVIL_HUMAN Supervillin OS=Homo sapiens OX=9606 GN=SVIL PE=1 SV=2	1	7	7	7	2	1	4	0	1	1	2	2	3	2	2	1	4	0	1	1	2	2	3	2	2	1	4	0	1	1
Q15022	Polycomb protein SUZ12	SUZ12	1.0069	0.97749	0.92619	0.99704	0.98584	0.93255	0.80272	0.83086	1.0291	1.361	Q15022	13	13	13	Polycomb protein SUZ12	SUZ12	sp|Q15022|SUZ12_HUMAN Polycomb protein SUZ12 OS=Homo sapiens OX=9606 GN=SUZ12 PE=1 SV=3	1	13	13	13	5	6	8	9	7	5	7	9	8	7	5	6	8	9	7	5	7	9	8	7	5	6	8	9	7	5
O75683	Surfeit locus protein 6	SURF6	0.85831	1.0227	0.79106	1.1736	0.37185	1.9411	0.87843	0.90548	1.001	5.3684	O75683	7	7	7	Surfeit locus protein 6	SURF6	sp|O75683|SURF6_HUMAN Surfeit locus protein 6 OS=Homo sapiens OX=9606 GN=SURF6 PE=1 SV=3	1	7	7	7	2	3	4	3	2	1	3	4	2	2	2	3	4	3	2	1	3	4	2	2	2	3	4	3	2	1
O15260	Surfeit locus protein 4	SURF4	0.91833	0.95329	0.91339	0.95186	0.94069	1.0278	1.1024	0.92108	0.83486	0.82599	O15260	5	5	5	Surfeit locus protein 4	SURF4	sp|O15260|SURF4_HUMAN Surfeit locus protein 4 OS=Homo sapiens OX=9606 GN=SURF4 PE=1 SV=3	1	5	5	5	4	4	4	4	4	3	3	4	4	4	4	4	4	4	4	3	3	4	4	4	4	4	4	4	4	3
Q15527	Surfeit locus protein 2	SURF2	0.7904	2.5342	NaN	NaN	NaN	0.71979	0.65287	0.62035	NaN	NaN	Q15527	3	3	3	Surfeit locus protein 2	SURF2	sp|Q15527|SURF2_HUMAN Surfeit locus protein 2 OS=Homo sapiens OX=9606 GN=SURF2 PE=1 SV=3	1	3	3	3	0	0	2	1	0	0	0	1	2	2	0	0	2	1	0	0	0	1	2	2	0	0	2	1	0	0
Q15526	Surfeit locus protein 1	SURF1	1.0734	1.0566	1.0931	1.0228	1.115	1.0411	1.0285	0.83979	0.97407	0.98635	Q15526	4	4	4	Surfeit locus protein 1	SURF1	sp|Q15526|SURF1_HUMAN Surfeit locus protein 1 OS=Homo sapiens OX=9606 GN=SURF1 PE=1 SV=1	1	4	4	4	1	2	1	3	2	1	3	3	1	1	1	2	1	3	2	1	3	3	1	1	1	2	1	3	2	1
Q8IYB8	ATP-dependent RNA helicase SUPV3L1, mitochondrial	SUPV3L1	0.92907	1.0012	0.95627	1.1278	1.0497	0.95714	1.0031	0.90466	1.0071	0.97831	Q8IYB8	14	14	14	ATP-dependent RNA helicase SUPV3L1, mitochondrial	SUPV3L1	sp|Q8IYB8|SUV3_HUMAN ATP-dependent RNA helicase SUPV3L1, mitochondrial OS=Homo sapiens OX=9606 GN=SUPV3L1 PE=1 SV=1	1	14	14	14	7	8	5	5	8	5	6	8	6	5	7	8	5	5	8	5	6	8	6	5	7	8	5	5	8	5
Q7KZ85	Transcription elongation factor SPT6	SUPT6H	1.033	0.97885	1.0384	1.0925	0.97975	1.0015	0.72854	0.75096	1.0477	1.1051	Q7KZ85	51	51	51	Transcription elongation factor SPT6	SUPT6H	sp|Q7KZ85|SPT6H_HUMAN Transcription elongation factor SPT6 OS=Homo sapiens OX=9606 GN=SUPT6H PE=1 SV=2	1	51	51	51	23	17	25	25	20	20	24	25	31	30	23	17	25	25	20	20	24	25	31	30	23	17	25	25	20	20
O00267	Transcription elongation factor SPT5	SUPT5H	1.0148	1.023	1.0235	1.0078	0.99415	0.97037	0.81645	0.78895	0.90008	0.95248	O00267	38	38	38	Transcription elongation factor SPT5	SUPT5H	sp|O00267|SPT5H_HUMAN Transcription elongation factor SPT5 OS=Homo sapiens OX=9606 GN=SUPT5H PE=1 SV=1	1	38	38	38	25	24	24	24	15	17	26	23	28	30	25	24	24	24	15	17	26	23	28	30	25	24	24	24	15	17
P63272	Transcription elongation factor SPT4	SUPT4H1	1.1076	0.88721	1.0623	NaN	NaN	0.88823	NaN	0.82594	NaN	NaN	P63272	2	2	2	Transcription elongation factor SPT4	SUPT4H1	sp|P63272|SPT4H_HUMAN Transcription elongation factor SPT4 OS=Homo sapiens OX=9606 GN=SUPT4H1 PE=1 SV=1	1	2	2	2	1	0	0	1	0	0	0	1	1	1	1	0	0	1	0	0	0	1	1	1	1	0	0	1	0	0
Q9Y5B9	FACT complex subunit SPT16	SUPT16H	1.0145	1.005	0.97127	1.0082	1.0032	1.028	0.92186	0.95542	1.0538	1.0553	Q9Y5B9	68	68	68	FACT complex subunit SPT16	SUPT16H	sp|Q9Y5B9|SP16H_HUMAN FACT complex subunit SPT16 OS=Homo sapiens OX=9606 GN=SUPT16H PE=1 SV=1	1	68	68	68	35	34	37	36	43	39	35	34	37	39	35	34	37	36	43	39	35	34	37	39	35	34	37	36	43	39
P51687	Sulfite oxidase, mitochondrial	SUOX	0.86436	0.86529	1.0377	0.81119	NaN	1.0238	1.0291	1.1421	NaN	NaN	P51687	1	1	1	Sulfite oxidase, mitochondrial	SUOX	sp|P51687|SUOX_HUMAN Sulfite oxidase, mitochondrial OS=Homo sapiens OX=9606 GN=SUOX PE=1 SV=2	1	1	1	1	1	1	1	1	0	0	0	1	1	1	1	1	1	1	0	0	0	1	1	1	1	1	1	1	0	0
Q9UH99	SUN domain-containing protein 2	SUN2	1.0032	0.90352	1.1205	0.98887	1.141	1.0634	1.7548	4.0133	NaN	0.82752	Q9UH99	6	6	6	SUN domain-containing protein 2	SUN2	sp|Q9UH99|SUN2_HUMAN SUN domain-containing protein 2 OS=Homo sapiens OX=9606 GN=SUN2 PE=1 SV=3	1	6	6	6	5	2	2	2	2	2	1	1	2	1	5	2	2	2	2	2	1	1	2	1	5	2	2	2	2	2
O94901	SUN domain-containing protein 1	SUN1	1.0582	1.0501	0.93132	0.99133	1.0932	1.0295	1.2936	1.2127	1.0342	0.934	O94901	24	24	24	SUN domain-containing protein 1	SUN1	sp|O94901|SUN1_HUMAN SUN domain-containing protein 1 OS=Homo sapiens OX=9606 GN=SUN1 PE=1 SV=3	1	24	24	24	14	15	9	11	8	8	14	12	11	10	14	15	9	11	8	8	14	12	11	10	14	15	9	11	8	8
P61956;Q6EEV6;P55854	Small ubiquitin-related modifier 2	SUMO2	0.99737	0.99935	1.0609	0.94628	0.95406	1.0062	0.92495	0.98132	1.2387	1.2255	P61956	5;1;1	5;1;1	5;1;1	Small ubiquitin-related modifier 2	SUMO2	sp|P61956|SUMO2_HUMAN Small ubiquitin-related modifier 2 OS=Homo sapiens OX=9606 GN=SUMO2 PE=1 SV=3	3	5	5	5	2	2	2	2	4	5	2	2	2	2	2	2	2	2	4	5	2	2	2	2	2	2	2	2	4	5
P63165;G2XKQ0	Small ubiquitin-related modifier 1	SUMO1	0.95086	0.88542	1.0198	0.92681	0.98113	0.90852	1.0026	0.99689	1.2247	1.0537	P63165	5;2	5;2	5;2	Small ubiquitin-related modifier 1	SUMO1	sp|P63165|SUMO1_HUMAN Small ubiquitin-related modifier 1 OS=Homo sapiens OX=9606 GN=SUMO1 PE=1 SV=1	2	5	5	5	4	4	3	3	4	5	3	4	4	4	4	4	3	3	4	5	3	4	4	4	4	4	3	3	4	5
Q8NBJ7	Sulfatase-modifying factor 2	SUMF2	0.9495	0.89248	0.90167	0.97796	0.87807	0.96422	1.0119	0.92362	0.7885	0.75216	Q8NBJ7	12	12	12	Sulfatase-modifying factor 2	SUMF2	sp|Q8NBJ7|SUMF2_HUMAN Inactive C-alpha-formylglycine-generating enzyme 2 OS=Homo sapiens OX=9606 GN=SUMF2 PE=1 SV=2	1	12	12	12	7	8	7	8	7	7	6	8	7	7	7	8	7	8	7	7	6	8	7	7	7	8	7	8	7	7
P0DMN0;P0DMM9	Sulfotransferase 1A4;Sulfotransferase 1A3	SULT1A4;SULT1A3	1.1924	0.88329	1.0654	0.97023	1.1113	1.1723	1.7113	1.6704	1.1826	1.2974	P0DMN0;P0DMM9	11;11	11;11	5;5	Sulfotransferase 1A4;Sulfotransferase 1A3	SULT1A4;SULT1A3	sp|P0DMN0|ST1A4_HUMAN Sulfotransferase 1A4 OS=Homo sapiens OX=9606 GN=SULT1A4 PE=1 SV=1;sp|P0DMM9|ST1A3_HUMAN Sulfotransferase 1A3 OS=Homo sapiens OX=9606 GN=SULT1A3 PE=1 SV=1	2	11	11	5	7	8	7	6	4	3	5	5	5	3	7	8	7	6	4	3	5	5	5	3	4	3	4	3	1	1
P50225;P50226	Sulfotransferase 1A1;Sulfotransferase 1A2	SULT1A1;SULT1A2	0.96724	0.95774	0.94523	1.0495	0.94305	0.93757	2.8227	2.7526	0.68092	NaN	P50225;P50226	10;7	4;3	4;3	Sulfotransferase 1A1;Sulfotransferase 1A2	SULT1A1;SULT1A2	sp|P50225|ST1A1_HUMAN Sulfotransferase 1A1 OS=Homo sapiens OX=9606 GN=SULT1A1 PE=1 SV=3;sp|P50226|ST1A2_HUMAN Sulfotransferase 1A2 OS=Homo sapiens OX=9606 GN=SULT1A2 PE=1 SV=2	2	10	4	4	7	9	7	7	4	3	4	4	4	4	4	4	4	4	1	1	3	3	2	3	4	4	4	4	1	1
Q9Y2Z0	Suppressor of G2 allele of SKP1 homolog	SUGT1	1.0235	1.129	1.0442	1.0225	0.99304	0.92313	1.0253	1.0224	1.097	1.0872	Q9Y2Z0	23	23	23	Suppressor of G2 allele of SKP1 homolog	SUGT1	sp|Q9Y2Z0|SGT1_HUMAN Protein SGT1 homolog OS=Homo sapiens OX=9606 GN=SUGT1 PE=1 SV=3	1	23	23	23	19	18	19	16	9	9	17	17	17	19	19	18	19	16	9	9	17	17	17	19	19	18	19	16	9	9
Q8IX01	SURP and G-patch domain-containing protein 2	SUGP2	0.97275	0.94696	1.0199	0.8775	1.0081	0.84644	0.93229	0.82768	6.2389	1.3035	Q8IX01	16	16	16	SURP and G-patch domain-containing protein 2	SUGP2	sp|Q8IX01|SUGP2_HUMAN SURP and G-patch domain-containing protein 2 OS=Homo sapiens OX=9606 GN=SUGP2 PE=1 SV=2	1	16	16	16	7	6	9	7	3	4	9	8	11	8	7	6	9	7	3	4	9	8	11	8	7	6	9	7	3	4
Q8IWZ8	SURP and G-patch domain-containing protein 1	SUGP1	1.1015	1.1015	0.97821	0.72764	0.7657	0.60867	0.98081	1.2032	0.93602	1.1668	Q8IWZ8	14	14	14	SURP and G-patch domain-containing protein 1	SUGP1	sp|Q8IWZ8|SUGP1_HUMAN SURP and G-patch domain-containing protein 1 OS=Homo sapiens OX=9606 GN=SUGP1 PE=1 SV=2	1	14	14	14	5	8	7	5	4	3	4	3	6	6	5	8	7	5	4	3	4	3	6	6	5	8	7	5	4	3
Q9UMX1	Suppressor of fused homolog	SUFU	NaN	NaN	NaN	NaN	NaN	NaN	NaN	NaN	NaN	NaN	Q9UMX1	1	1	1	Suppressor of fused homolog	SUFU	sp|Q9UMX1|SUFU_HUMAN Suppressor of fused homolog OS=Homo sapiens OX=9606 GN=SUFU PE=1 SV=2	1	1	1	1	1	1	0	1	0	0	1	1	1	1	1	1	0	1	0	0	1	1	1	1	1	1	0	1	0	0
Q9H7L9	Sin3 histone deacetylase corepressor complex component SDS3	SUDS3	0.85333	0.73473	1.5087	3.6853	2.7528	0.85373	NaN	1.9991	0.87314	NaN	Q9H7L9	5	5	5	Sin3 histone deacetylase corepressor complex component SDS3	SUDS3	sp|Q9H7L9|SDS3_HUMAN Sin3 histone deacetylase corepressor complex component SDS3 OS=Homo sapiens OX=9606 GN=SUDS3 PE=1 SV=2	1	5	5	5	2	1	0	2	1	0	1	2	1	3	2	1	0	2	1	0	1	2	1	3	2	1	0	2	1	0
Q96I99	Succinyl-CoA ligase [GDP-forming] subunit beta, mitochondrial	SUCLG2	1.0287	0.99305	1.0387	1.0456	1.1491	1.0384	1.359	1.2283	1.0424	1.1376	Q96I99	23	23	23	Succinyl-CoA ligase [GDP-forming] subunit beta, mitochondrial	SUCLG2	sp|Q96I99|SUCB2_HUMAN Succinate--CoA ligase [GDP-forming] subunit beta, mitochondrial OS=Homo sapiens OX=9606 GN=SUCLG2 PE=1 SV=2	1	23	23	23	18	17	15	16	10	10	16	16	14	16	18	17	15	16	10	10	16	16	14	16	18	17	15	16	10	10
P53597	Succinyl-CoA ligase [ADP/GDP-forming] subunit alpha, mitochondrial	SUCLG1	1.1087	1.0599	1.0396	1.0066	1.0944	1.043	1.2778	1.2525	1.0857	1.0632	P53597	13	13	13	Succinyl-CoA ligase [ADP/GDP-forming] subunit alpha, mitochondrial	SUCLG1	sp|P53597|SUCA_HUMAN Succinate--CoA ligase [ADP/GDP-forming] subunit alpha, mitochondrial OS=Homo sapiens OX=9606 GN=SUCLG1 PE=1 SV=4	1	13	13	13	9	10	9	10	10	9	11	11	8	8	9	10	9	10	10	9	11	11	8	8	9	10	9	10	10	9
Q9P2R7	Succinyl-CoA ligase [ADP-forming] subunit beta, mitochondrial	SUCLA2	0.95275	1.0197	0.95797	1.0523	1.0366	1.1465	1.1589	1.0625	1.1495	1.0875	Q9P2R7	18	18	18	Succinyl-CoA ligase [ADP-forming] subunit beta, mitochondrial	SUCLA2	sp|Q9P2R7|SUCB1_HUMAN Succinate--CoA ligase [ADP-forming] subunit beta, mitochondrial OS=Homo sapiens OX=9606 GN=SUCLA2 PE=1 SV=3	1	18	18	18	13	12	11	11	8	6	12	12	11	10	13	12	11	11	8	6	12	12	11	10	13	12	11	11	8	6
P53999	Activated RNA polymerase II transcriptional coactivator p15	SUB1	0.95205	0.98583	0.9985	1.036	0.97704	0.99906	1.0386	1.0517	0.9545	1.0314	P53999	10	10	10	Activated RNA polymerase II transcriptional coactivator p15	SUB1	sp|P53999|TCP4_HUMAN Activated RNA polymerase II transcriptional coactivator p15 OS=Homo sapiens OX=9606 GN=SUB1 PE=1 SV=3	1	10	10	10	5	4	4	4	5	7	4	5	5	4	5	4	4	4	5	7	4	5	5	4	5	4	4	4	5	7
Q5T5C0	Syntaxin-binding protein 5	STXBP5	NaN	0.94039	0.90742	0.94208	0.81577	0.98101	0.92214	1.473	NaN	NaN	Q5T5C0	2	2	2	Syntaxin-binding protein 5	STXBP5	sp|Q5T5C0|STXB5_HUMAN Syntaxin-binding protein 5 OS=Homo sapiens OX=9606 GN=STXBP5 PE=1 SV=1	1	2	2	2	1	1	1	1	0	0	1	1	0	1	1	1	1	1	0	0	1	1	0	1	1	1	1	1	0	0
Q6ZWJ1	Syntaxin-binding protein 4	STXBP4	1.6199	1.3546	NaN	NaN	1.2753	NaN	NaN	0.44697	2.3505	NaN	Q6ZWJ1	5	5	5	Syntaxin-binding protein 4	STXBP4	sp|Q6ZWJ1|STXB4_HUMAN Syntaxin-binding protein 4 OS=Homo sapiens OX=9606 GN=STXBP4 PE=1 SV=2	1	5	5	5	0	0	0	1	1	0	1	0	3	3	0	0	0	1	1	0	1	0	3	3	0	0	0	1	1	0
O00186	Syntaxin-binding protein 3	STXBP3	0.93024	0.86351	1.044	1.0737	0.94705	NaN	1.1708	1.01	0.8027	0.76573	O00186	4	4	4	Syntaxin-binding protein 3	STXBP3	sp|O00186|STXB3_HUMAN Syntaxin-binding protein 3 OS=Homo sapiens OX=9606 GN=STXBP3 PE=1 SV=2	1	4	4	4	2	1	1	1	3	3	1	0	1	1	2	1	1	1	3	3	1	0	1	1	2	1	1	1	3	3
Q15833	Syntaxin-binding protein 2	STXBP2	1.0617	1.0359	1.0657	1.0547	1.0692	0.98957	1.2029	1.0904	0.79825	0.82951	Q15833	29	29	29	Syntaxin-binding protein 2	STXBP2	sp|Q15833|STXB2_HUMAN Syntaxin-binding protein 2 OS=Homo sapiens OX=9606 GN=STXBP2 PE=1 SV=2	1	29	29	29	13	15	16	15	11	10	13	14	15	17	13	15	16	15	11	10	13	14	15	17	13	15	16	15	11	10
P61764	Syntaxin-binding protein 1	STXBP1	1.0382	1.2839	1.1955	1.0132	0.9151	1.6938	1.2886	0.79821	1.0893	NaN	P61764	7	7	7	Syntaxin-binding protein 1	STXBP1	sp|P61764|STXB1_HUMAN Syntaxin-binding protein 1 OS=Homo sapiens OX=9606 GN=STXBP1 PE=1 SV=1	1	7	7	7	2	3	3	5	1	0	4	1	2	2	2	3	3	5	1	0	4	1	2	2	2	3	3	5	1	0
Q9UNK0	Syntaxin-8	STX8	0.52498	0.72417	1.2167	0.88813	1.8027	0.84779	1.1548	1.0723	1.9928	NaN	Q9UNK0	5	5	5	Syntaxin-8	STX8	sp|Q9UNK0|STX8_HUMAN Syntaxin-8 OS=Homo sapiens OX=9606 GN=STX8 PE=1 SV=2	1	5	5	5	2	2	1	3	2	0	2	1	1	2	2	2	1	3	2	0	2	1	1	2	2	2	1	3	2	0
O15400	Syntaxin-7	STX7	0.84899	1.1276	1.138	0.96863	0.99943	1.0986	1.5463	1.6969	1.2042	1.2902	O15400	8	8	8	Syntaxin-7	STX7	sp|O15400|STX7_HUMAN Syntaxin-7 OS=Homo sapiens OX=9606 GN=STX7 PE=1 SV=4	1	8	8	8	2	3	3	4	5	5	4	4	4	4	2	3	3	4	5	5	4	4	4	4	2	3	3	4	5	5
O43752	Syntaxin-6	STX6	0.95691	0.94047	1.0952	0.9369	1.1545	1.0737	1.0747	1.2085	0.64204	0.69309	O43752	8	8	8	Syntaxin-6	STX6	sp|O43752|STX6_HUMAN Syntaxin-6 OS=Homo sapiens OX=9606 GN=STX6 PE=1 SV=1	1	8	8	8	2	3	4	1	3	1	1	1	1	3	2	3	4	1	3	1	1	1	1	3	2	3	4	1	3	1
Q13190	Syntaxin-5	STX5	0.99026	1.0467	0.9086	1.0522	1.0702	1.06	0.96736	1.1428	0.66329	0.72484	Q13190	9	9	9	Syntaxin-5	STX5	sp|Q13190|STX5_HUMAN Syntaxin-5 OS=Homo sapiens OX=9606 GN=STX5 PE=1 SV=2	1	9	9	9	7	5	4	3	3	2	3	3	5	4	7	5	4	3	3	2	3	3	5	4	7	5	4	3	3	2
Q12846	Syntaxin-4	STX4	NaN	NaN	NaN	NaN	NaN	NaN	NaN	NaN	1.7493	NaN	Q12846	1	1	1	Syntaxin-4	STX4	sp|Q12846|STX4_HUMAN Syntaxin-4 OS=Homo sapiens OX=9606 GN=STX4 PE=1 SV=2	1	1	1	1	0	0	0	0	1	0	0	0	0	0	0	0	0	0	1	0	0	0	0	0	0	0	0	0	1	0
Q13277	Syntaxin-3	STX3	0.89656	0.75235	0.53444	0.63513	0.57079	1.0365	0.98916	1.5093	1.4708	NaN	Q13277	5	5	5	Syntaxin-3	STX3	sp|Q13277|STX3_HUMAN Syntaxin-3 OS=Homo sapiens OX=9606 GN=STX3 PE=1 SV=3	1	5	5	5	3	2	2	1	1	0	1	1	2	2	3	2	2	1	1	0	1	1	2	2	3	2	2	1	1	0
Q9P2W9	Syntaxin-18	STX18	0.99697	0.91657	0.90544	1.0204	0.92909	0.95039	0.78752	0.91865	0.54434	0.84702	Q9P2W9	8	8	8	Syntaxin-18	STX18	sp|Q9P2W9|STX18_HUMAN Syntaxin-18 OS=Homo sapiens OX=9606 GN=STX18 PE=1 SV=1	1	8	8	8	3	3	3	3	2	2	3	3	4	4	3	3	3	3	2	2	3	3	4	4	3	3	3	3	2	2
H3BU86;O14662	Syntaxin-16	STX16-NPEPL1;STX16	NaN	NaN	NaN	NaN	NaN	NaN	NaN	NaN	1.1841	1.1594	H3BU86;O14662	1;1	1;1	1;1	Syntaxin-16	STX16-NPEPL1;STX16	tr|H3BU86|H3BU86_HUMAN STX16-NPEPL1 readthrough (NMD candidate) OS=Homo sapiens OX=9606 GN=STX16-NPEPL1 PE=3 SV=1;sp|O14662|STX16_HUMAN Syntaxin-16 OS=Homo sapiens OX=9606 GN=STX16 PE=1 SV=3	2	1	1	1	0	0	0	0	1	1	0	0	0	0	0	0	0	0	1	1	0	0	0	0	0	0	0	0	1	1
Q86Y82	Syntaxin-12	STX12	0.65542	0.85849	0.91274	0.79341	0.97663	1.0287	0.97144	0.99907	0.44586	0.80977	Q86Y82	7	7	7	Syntaxin-12	STX12	sp|Q86Y82|STX12_HUMAN Syntaxin-12 OS=Homo sapiens OX=9606 GN=STX12 PE=1 SV=1	1	7	7	7	5	5	6	6	3	4	5	5	5	5	5	5	6	6	3	4	5	5	5	5	5	5	6	6	3	4
O60499	Syntaxin-10	STX10	0.94406	0.83998	0.93008	0.86254	0.89347	0.97883	0.84773	0.84514	1.0216	0.97476	O60499	6	6	6	Syntaxin-10	STX10	sp|O60499|STX10_HUMAN Syntaxin-10 OS=Homo sapiens OX=9606 GN=STX10 PE=1 SV=1	1	6	6	6	1	1	3	2	2	2	1	1	4	3	1	1	3	2	2	2	1	1	4	3	1	1	3	2	2	2
Q9UNE7	E3 ubiquitin-protein ligase CHIP	STUB1	1.0042	0.94865	0.92485	0.91234	0.94658	1.0425	0.88141	1.164	0.75297	0.85573	Q9UNE7	8	8	8	E3 ubiquitin-protein ligase CHIP	STUB1	sp|Q9UNE7|CHIP_HUMAN E3 ubiquitin-protein ligase CHIP OS=Homo sapiens OX=9606 GN=STUB1 PE=1 SV=2	1	8	8	8	4	5	4	4	2	3	2	3	6	6	4	5	4	4	2	3	2	3	6	6	4	5	4	4	2	3
Q8TCJ2	Dolichyl-diphosphooligosaccharide--protein glycosyltransferase subunit STT3B	STT3B	1.0784	0.94641	0.96356	1.0494	1.027	0.96206	1.2103	1.1976	0.97725	0.92003	Q8TCJ2	15	13	13	Dolichyl-diphosphooligosaccharide--protein glycosyltransferase subunit STT3B	STT3B	sp|Q8TCJ2|STT3B_HUMAN Dolichyl-diphosphooligosaccharide--protein glycosyltransferase subunit STT3B OS=Homo sapiens OX=9606 GN=STT3B PE=1 SV=1	1	15	13	13	11	11	10	9	7	7	9	11	11	9	9	9	9	9	7	7	9	10	10	8	9	9	9	9	7	7
P46977	Dolichyl-diphosphooligosaccharide--protein glycosyltransferase subunit STT3A	STT3A	1.0497	1.0488	1.0527	0.99249	1.0523	0.97635	0.98563	1.0068	1.0091	1.0508	P46977	20	20	18	Dolichyl-diphosphooligosaccharide--protein glycosyltransferase subunit STT3A	STT3A	sp|P46977|STT3A_HUMAN Dolichyl-diphosphooligosaccharide--protein glycosyltransferase subunit STT3A OS=Homo sapiens OX=9606 GN=STT3A PE=1 SV=2	1	20	20	18	13	14	13	12	10	9	11	13	13	12	13	14	13	12	10	9	11	13	13	12	11	12	12	12	10	9
Q9NRL3	Striatin-4	STRN4	0.90864	0.90152	0.90899	0.91766	0.95402	0.92185	0.97508	1.0334	0.96849	1.0555	Q9NRL3	18	18	16	Striatin-4	STRN4	sp|Q9NRL3|STRN4_HUMAN Striatin-4 OS=Homo sapiens OX=9606 GN=STRN4 PE=1 SV=2	1	18	18	16	5	8	4	5	4	4	6	7	10	7	5	8	4	5	4	4	6	7	10	7	5	8	4	5	3	2
Q13033	Striatin-3	STRN3	1.0464	1.2801	1.0334	1.1137	1.0451	1.2837	0.95038	1.0041	0.99093	0.90092	Q13033	13	11	11	Striatin-3	STRN3	sp|Q13033|STRN3_HUMAN Striatin-3 OS=Homo sapiens OX=9606 GN=STRN3 PE=1 SV=3	1	13	11	11	3	5	3	5	5	6	4	3	6	6	3	5	3	5	4	4	4	3	6	6	3	5	3	5	4	4
O43815	Striatin	STRN	0.96612	1.0201	0.9556	1.1286	1.0702	1.2331	1.7184	1.5509	0.70802	1.1669	O43815	10	9	9	Striatin	STRN	sp|O43815|STRN_HUMAN Striatin OS=Homo sapiens OX=9606 GN=STRN PE=1 SV=4	1	10	9	9	5	5	3	3	2	4	2	4	3	2	5	5	3	3	2	3	2	4	3	2	5	5	3	3	2	3
Q9ULQ0	Striatin-interacting protein 2	STRIP2	NaN	NaN	NaN	NaN	NaN	NaN	0.53849	NaN	NaN	NaN	Q9ULQ0	3	1	1	Striatin-interacting protein 2	STRIP2	sp|Q9ULQ0|STRP2_HUMAN Striatin-interacting protein 2 OS=Homo sapiens OX=9606 GN=STRIP2 PE=1 SV=2	1	3	1	1	1	1	2	1	0	0	1	0	2	1	0	0	1	0	0	0	0	0	0	0	0	0	1	0	0	0
Q5VSL9	Striatin-interacting protein 1	STRIP1	0.85964	0.98071	0.96334	1.0572	1.0389	0.91897	0.95938	1.0113	NaN	NaN	Q5VSL9	7	7	5	Striatin-interacting protein 1	STRIP1	sp|Q5VSL9|STRP1_HUMAN Striatin-interacting protein 1 OS=Homo sapiens OX=9606 GN=STRIP1 PE=1 SV=1	1	7	7	5	6	4	4	3	0	0	4	3	6	6	6	4	4	3	0	0	4	3	6	6	5	3	3	2	0	0
Q96SI9	Spermatid perinuclear RNA-binding protein	STRBP	0.9955	0.91916	0.83263	1.0459	0.85857	0.98077	0.98383	0.98237	0.93633	1.0544	Q96SI9	17	12	12	Spermatid perinuclear RNA-binding protein	STRBP	sp|Q96SI9|STRBP_HUMAN Spermatid perinuclear RNA-binding protein OS=Homo sapiens OX=9606 GN=STRBP PE=1 SV=1	1	17	12	12	8	10	7	9	6	5	12	10	11	8	4	6	3	5	2	1	8	6	7	4	4	6	3	5	2	1
Q9Y3F4	Serine-threonine kinase receptor-associated protein	STRAP	0.95964	0.98637	0.9515	0.97631	0.93329	0.93201	0.95785	0.93134	0.60454	0.60345	Q9Y3F4	28	28	28	Serine-threonine kinase receptor-associated protein	STRAP	sp|Q9Y3F4|STRAP_HUMAN Serine-threonine kinase receptor-associated protein OS=Homo sapiens OX=9606 GN=STRAP PE=1 SV=1	1	28	28	28	19	20	19	17	19	21	19	18	21	21	19	20	19	17	19	21	19	18	21	21	19	20	19	17	19	21
Q9UJZ1	Stomatin-like protein 2, mitochondrial	STOML2	1.0202	0.98152	0.9607	1.0133	1.0003	1.0574	0.98955	0.95712	0.94687	0.9422	Q9UJZ1	21	21	21	Stomatin-like protein 2, mitochondrial	STOML2	sp|Q9UJZ1|STML2_HUMAN Stomatin-like protein 2, mitochondrial OS=Homo sapiens OX=9606 GN=STOML2 PE=1 SV=1	1	21	21	21	12	13	12	12	16	14	12	13	12	13	12	13	12	12	16	14	12	13	12	13	12	13	12	12	16	14
P27105	Erythrocyte band 7 integral membrane protein	STOM	NaN	NaN	NaN	NaN	NaN	NaN	1.0633	NaN	NaN	NaN	P27105	2	2	2	Erythrocyte band 7 integral membrane protein	STOM	sp|P27105|STOM_HUMAN Erythrocyte band 7 integral membrane protein OS=Homo sapiens OX=9606 GN=STOM PE=1 SV=3	1	2	2	2	0	0	1	0	1	0	0	0	0	0	0	0	1	0	1	0	0	0	0	0	0	0	1	0	1	0
Q93045	Stathmin-2	STMN2	1.099	1.1204	0.9918	1.0888	0.9656	1.0511	1.1045	1.0089	1.5892	1.7359	Q93045	5	1	1	Stathmin-2	STMN2	sp|Q93045|STMN2_HUMAN Stathmin-2 OS=Homo sapiens OX=9606 GN=STMN2 PE=1 SV=3	1	5	1	1	2	4	3	3	4	4	3	4	3	4	1	1	1	1	1	1	1	1	1	1	1	1	1	1	1	1
P16949	Stathmin	STMN1	1.0071	0.94981	1.0655	0.91178	0.89904	1.0011	0.95285	0.95453	1.5805	1.6106	P16949	18	18	14	Stathmin	STMN1	sp|P16949|STMN1_HUMAN Stathmin OS=Homo sapiens OX=9606 GN=STMN1 PE=1 SV=3	1	18	18	14	8	10	9	9	12	15	9	10	7	11	8	10	9	9	12	15	9	10	7	11	7	7	7	7	9	12
Q13043	Serine/threonine-protein kinase 4;Serine/threonine-protein kinase 4 37kDa subunit;Serine/threonine-protein kinase 4 18kDa subunit	STK4	0.88236	0.91364	0.85822	0.79133	0.71737	0.77379	0.92649	0.86014	NaN	1.2617	Q13043	9	3	3	Serine/threonine-protein kinase 4;Serine/threonine-protein kinase 4 37kDa subunit;Serine/threonine-protein kinase 4 18kDa subunit	STK4	sp|Q13043|STK4_HUMAN Serine/threonine-protein kinase 4 OS=Homo sapiens OX=9606 GN=STK4 PE=1 SV=2	1	9	3	3	5	4	2	2	2	2	4	2	3	3	1	1	1	1	0	1	2	1	1	1	1	1	1	1	0	1
Q9UEW8	STE20/SPS1-related proline-alanine-rich protein kinase	STK39	0.99866	0.99026	1.0256	1.0537	1.0508	1.0067	1.2251	1.1613	1.1265	1.2237	Q9UEW8	19	19	15	STE20/SPS1-related proline-alanine-rich protein kinase	STK39	sp|Q9UEW8|STK39_HUMAN STE20/SPS1-related proline-alanine-rich protein kinase OS=Homo sapiens OX=9606 GN=STK39 PE=1 SV=3	1	19	19	15	15	12	13	13	5	3	15	12	13	13	15	12	13	13	5	3	15	12	13	13	12	9	10	10	4	1
Q9Y2H1	Serine/threonine-protein kinase 38-like	STK38L	1.1164	1.1299	1.1141	1.1795	1.1095	1.0448	1.0158	1.1509	1.38	1.45	Q9Y2H1	4	4	4	Serine/threonine-protein kinase 38-like	STK38L	sp|Q9Y2H1|ST38L_HUMAN Serine/threonine-protein kinase 38-like OS=Homo sapiens OX=9606 GN=STK38L PE=1 SV=3	1	4	4	4	1	1	1	1	2	2	1	1	1	1	1	1	1	1	2	2	1	1	1	1	1	1	1	1	2	2
Q15208	Serine/threonine-protein kinase 38	STK38	NaN	NaN	NaN	NaN	NaN	NaN	NaN	NaN	NaN	0.9888	Q15208	1	1	1	Serine/threonine-protein kinase 38	STK38	sp|Q15208|STK38_HUMAN Serine/threonine-protein kinase 38 OS=Homo sapiens OX=9606 GN=STK38 PE=1 SV=1	1	1	1	1	0	0	0	0	0	1	0	0	0	0	0	0	0	0	0	1	0	0	0	0	0	0	0	0	0	1
Q86UX6	Serine/threonine-protein kinase 32C	STK32C	1.1199	NaN	1.3427	NaN	1.5932	NaN	NaN	NaN	NaN	NaN	Q86UX6	2	2	2	Serine/threonine-protein kinase 32C	STK32C	sp|Q86UX6|ST32C_HUMAN Serine/threonine-protein kinase 32C OS=Homo sapiens OX=9606 GN=STK32C PE=1 SV=1	1	2	2	2	1	0	0	0	0	1	1	0	1	0	1	0	0	0	0	1	1	0	1	0	1	0	0	0	0	1
Q13188	Serine/threonine-protein kinase 3;Serine/threonine-protein kinase 3 36kDa subunit;Serine/threonine-protein kinase 3 20kDa subunit	STK3	1.2561	1.1514	1.0335	1.1856	1.1114	1.0845	1.6493	1.7645	1.4758	1.5584	Q13188	13	13	7	Serine/threonine-protein kinase 3;Serine/threonine-protein kinase 3 36kDa subunit;Serine/threonine-protein kinase 3 20kDa subunit	STK3	sp|Q13188|STK3_HUMAN Serine/threonine-protein kinase 3 OS=Homo sapiens OX=9606 GN=STK3 PE=1 SV=2	1	13	13	7	9	7	6	5	5	4	6	5	4	4	9	7	6	5	5	4	6	5	4	4	5	4	5	4	3	3
Q9P289	Serine/threonine-protein kinase 26	STK26	NaN	NaN	1.5056	0.99724	1.4471	0.66636	2.4717	1.1776	NaN	NaN	Q9P289	12	5	5	Serine/threonine-protein kinase 26	STK26	sp|Q9P289|STK26_HUMAN Serine/threonine-protein kinase 26 OS=Homo sapiens OX=9606 GN=STK26 PE=1 SV=2	1	12	5	5	9	9	8	6	4	3	7	7	3	4	4	4	3	2	0	0	3	2	0	0	4	4	3	2	0	0
O00506	Serine/threonine-protein kinase 25	STK25	0.95474	0.97484	0.89925	0.8985	0.84268	0.84223	1.0604	1.2806	NaN	NaN	O00506	6	2	2	Serine/threonine-protein kinase 25	STK25	sp|O00506|STK25_HUMAN Serine/threonine-protein kinase 25 OS=Homo sapiens OX=9606 GN=STK25 PE=1 SV=1	1	6	2	2	3	5	4	5	2	2	4	4	4	4	1	2	1	2	0	0	1	1	1	1	1	2	1	2	0	0
Q9Y6E0	Serine/threonine-protein kinase 24;Serine/threonine-protein kinase 24 36 kDa subunit;Serine/threonine-protein kinase 24 12 kDa subunit	STK24	0.93744	0.995	0.96542	0.99254	0.97099	0.9539	1.071	1.2016	0.6514	0.85024	Q9Y6E0	21	21	13	Serine/threonine-protein kinase 24;Serine/threonine-protein kinase 24 36 kDa subunit;Serine/threonine-protein kinase 24 12 kDa subunit	STK24	sp|Q9Y6E0|STK24_HUMAN Serine/threonine-protein kinase 24 OS=Homo sapiens OX=9606 GN=STK24 PE=1 SV=1	1	21	21	13	10	12	11	10	10	9	9	11	12	11	10	12	11	10	10	9	9	11	12	11	5	6	5	5	6	6
Q8N1F8	Serine/threonine-protein kinase 11-interacting protein	STK11IP	1.0312	NaN	0.95495	NaN	1.1048	0.989	0.8256	NaN	NaN	NaN	Q8N1F8	2	2	2	Serine/threonine-protein kinase 11-interacting protein	STK11IP	sp|Q8N1F8|S11IP_HUMAN Serine/threonine-protein kinase 11-interacting protein OS=Homo sapiens OX=9606 GN=STK11IP PE=1 SV=4	1	2	2	2	2	0	1	0	0	0	1	1	1	0	2	0	1	0	0	0	1	1	1	0	2	0	1	0	0	0
O94804	Serine/threonine-protein kinase 10	STK10	0.89081	1.07	2.048	1.0637	0.75901	1.1422	0.8091	1.2605	0.68746	0.81359	O94804	11	9	9	Serine/threonine-protein kinase 10	STK10	sp|O94804|STK10_HUMAN Serine/threonine-protein kinase 10 OS=Homo sapiens OX=9606 GN=STK10 PE=1 SV=1	1	11	9	9	2	2	2	3	5	4	1	2	4	5	2	1	1	2	4	3	1	2	2	4	2	1	1	2	4	3
P31948	Stress-induced-phosphoprotein 1	STIP1	1.0208	0.98937	1.0622	0.99106	0.97321	1.0017	1.0926	1.1169	1.1169	1.1143	P31948	77	77	77	Stress-induced-phosphoprotein 1	STIP1	sp|P31948|STIP1_HUMAN Stress-induced-phosphoprotein 1 OS=Homo sapiens OX=9606 GN=STIP1 PE=1 SV=1	1	77	77	77	38	38	40	39	51	56	39	38	39	40	38	38	40	39	51	56	39	38	39	40	38	38	40	39	51	56
Q9P246	Stromal interaction molecule 2	STIM2	1.1154	1.1297	1.2298	0.99553	0.89473	1.0883	0.87185	0.95695	NaN	NaN	Q9P246	4	4	4	Stromal interaction molecule 2	STIM2	sp|Q9P246|STIM2_HUMAN Stromal interaction molecule 2 OS=Homo sapiens OX=9606 GN=STIM2 PE=1 SV=2	1	4	4	4	2	2	2	2	0	0	2	3	3	4	2	2	2	2	0	0	2	3	3	4	2	2	2	2	0	0
Q13586	Stromal interaction molecule 1	STIM1	1.0035	NaN	0.84988	NaN	NaN	NaN	NaN	NaN	1.2578	0.6673	Q13586	4	4	4	Stromal interaction molecule 1	STIM1	sp|Q13586|STIM1_HUMAN Stromal interaction molecule 1 OS=Homo sapiens OX=9606 GN=STIM1 PE=1 SV=3	1	4	4	4	1	0	0	0	1	2	0	0	1	0	1	0	0	0	1	2	0	0	1	0	1	0	0	0	1	2
Q9NUL3	Double-stranded RNA-binding protein Staufen homolog 2	STAU2	0.85495	0.97022	0.94503	0.86611	1.1074	0.99714	1.3365	1.2538	NaN	1.5966	Q9NUL3	10	8	8	Double-stranded RNA-binding protein Staufen homolog 2	STAU2	sp|Q9NUL3|STAU2_HUMAN Double-stranded RNA-binding protein Staufen homolog 2 OS=Homo sapiens OX=9606 GN=STAU2 PE=1 SV=2	1	10	8	8	9	8	7	7	3	3	7	9	5	6	7	6	5	5	2	2	5	7	3	4	7	6	5	5	2	2
O95793	Double-stranded RNA-binding protein Staufen homolog 1	STAU1	0.97797	0.93839	0.92313	0.92733	0.85127	0.88191	1.0706	1.0191	1.3044	1.2679	O95793	32	32	30	Double-stranded RNA-binding protein Staufen homolog 1	STAU1	sp|O95793|STAU1_HUMAN Double-stranded RNA-binding protein Staufen homolog 1 OS=Homo sapiens OX=9606 GN=STAU1 PE=1 SV=2	1	32	32	30	20	20	18	16	14	13	19	21	20	21	20	20	18	16	14	13	19	21	20	21	18	18	16	14	13	12
P42226	Signal transducer and activator of transcription 6	STAT6	NaN	NaN	NaN	NaN	0.89845	0.66007	NaN	NaN	NaN	NaN	P42226	2	2	2	Signal transducer and activator of transcription 6	STAT6	sp|P42226|STAT6_HUMAN Signal transducer and activator of transcription 6 OS=Homo sapiens OX=9606 GN=STAT6 PE=1 SV=1	1	2	2	2	0	0	0	0	0	0	1	1	0	0	0	0	0	0	0	0	1	1	0	0	0	0	0	0	0	0
P40763	Signal transducer and activator of transcription 3	STAT3	1.0813	1.0902	0.96219	1.001	0.99804	1.1818	1.3139	1.3733	1.3797	1.621	P40763	19	19	19	Signal transducer and activator of transcription 3	STAT3	sp|P40763|STAT3_HUMAN Signal transducer and activator of transcription 3 OS=Homo sapiens OX=9606 GN=STAT3 PE=1 SV=2	1	19	19	19	11	9	9	11	7	7	10	11	13	9	11	9	9	11	7	7	10	11	13	9	11	9	9	11	7	7
P52630	Signal transducer and activator of transcription 2	STAT2	NaN	NaN	NaN	0.9726	NaN	NaN	1.7388	1.9104	NaN	0.90651	P52630	3	3	3	Signal transducer and activator of transcription 2	STAT2	sp|P52630|STAT2_HUMAN Signal transducer and activator of transcription 2 OS=Homo sapiens OX=9606 GN=STAT2 PE=1 SV=1	1	3	3	3	0	1	1	1	0	1	0	0	1	0	0	1	1	1	0	1	0	0	1	0	0	1	1	1	0	1
P42224	Signal transducer and activator of transcription 1-alpha/beta	STAT1	1.0034	0.94224	0.97426	1.0025	1.0029	0.99836	1.2463	1.1365	1.1017	1.1384	P42224	24	24	24	Signal transducer and activator of transcription 1-alpha/beta	STAT1	sp|P42224|STAT1_HUMAN Signal transducer and activator of transcription 1-alpha/beta OS=Homo sapiens OX=9606 GN=STAT1 PE=1 SV=2	1	24	24	24	20	17	16	14	11	11	16	17	17	15	20	17	16	14	11	11	16	17	17	15	20	17	16	14	11	11
Q9NQZ5	StAR-related lipid transfer protein 7, mitochondrial	STARD7	1.2599	0.96569	2.2093	1.5887	2.6546	NaN	0.80753	0.67375	NaN	1.2097	Q9NQZ5	5	5	5	StAR-related lipid transfer protein 7, mitochondrial	STARD7	sp|Q9NQZ5|STAR7_HUMAN StAR-related lipid transfer protein 7, mitochondrial OS=Homo sapiens OX=9606 GN=STARD7 PE=1 SV=2	1	5	5	5	3	3	2	2	0	1	2	1	1	3	3	3	2	2	0	1	2	1	1	3	3	3	2	2	0	1
Q14849	StAR-related lipid transfer protein 3	STARD3	1.1014	1.0029	0.79251	0.82021	0.85342	1.0093	0.90438	0.95638	NaN	NaN	Q14849	1	1	1	StAR-related lipid transfer protein 3	STARD3	sp|Q14849|STAR3_HUMAN StAR-related lipid transfer protein 3 OS=Homo sapiens OX=9606 GN=STARD3 PE=1 SV=2	1	1	1	1	1	1	1	1	0	0	1	1	1	1	1	1	1	1	0	0	1	1	1	1	1	1	1	1	0	0
Q9Y365	PCTP-like protein	STARD10	NaN	NaN	NaN	NaN	NaN	NaN	NaN	NaN	0.69924	1.0143	Q9Y365	3	3	3	PCTP-like protein	STARD10	sp|Q9Y365|STA10_HUMAN START domain-containing protein 10 OS=Homo sapiens OX=9606 GN=STARD10 PE=1 SV=2	1	3	3	3	0	1	0	0	2	2	0	0	0	0	0	1	0	0	2	2	0	0	0	0	0	1	0	0	2	2
O95630	STAM-binding protein	STAMBP	0.88428	1.0066	1.0614	1.2751	1.0415	1.1871	0.96692	1.4991	NaN	1.1304	O95630	7	7	7	STAM-binding protein	STAMBP	sp|O95630|STABP_HUMAN STAM-binding protein OS=Homo sapiens OX=9606 GN=STAMBP PE=1 SV=1	1	7	7	7	5	6	4	5	1	2	4	6	4	3	5	6	4	5	1	2	4	6	4	3	5	6	4	5	1	2
O75886	Signal transducing adapter molecule 2	STAM2	0.94942	1.3532	1.375	1.4121	1.0909	0.68537	1.0616	1.2849	NaN	0.90209	O75886	7	5	5	Signal transducing adapter molecule 2	STAM2	sp|O75886|STAM2_HUMAN Signal transducing adapter molecule 2 OS=Homo sapiens OX=9606 GN=STAM2 PE=1 SV=1	1	7	5	5	3	3	3	3	3	3	2	2	4	3	1	1	2	2	1	1	1	1	2	1	1	1	2	2	1	1
Q92783	Signal transducing adapter molecule 1	STAM	1.1061	0.97494	1.0469	1.0225	1.0008	1.221	1.2865	1.2348	0.93326	0.90141	Q92783	12	12	10	Signal transducing adapter molecule 1	STAM	sp|Q92783|STAM1_HUMAN Signal transducing adapter molecule 1 OS=Homo sapiens OX=9606 GN=STAM PE=1 SV=3	1	12	12	10	10	9	8	8	3	4	9	9	10	10	10	9	8	8	3	4	9	9	10	10	8	7	7	7	1	2
Q8N3U4	Cohesin subunit SA-2	STAG2	1.0307	0.97201	0.94555	0.98472	0.97704	0.87953	0.84937	0.9048	1.2032	0.93672	Q8N3U4	24	24	19	Cohesin subunit SA-2	STAG2	sp|Q8N3U4|STAG2_HUMAN Cohesin subunit SA-2 OS=Homo sapiens OX=9606 GN=STAG2 PE=1 SV=3	1	24	24	19	12	8	9	10	4	5	9	13	10	9	12	8	9	10	4	5	9	13	10	9	8	5	6	6	3	4
Q8WVM7	Cohesin subunit SA-1	STAG1	1.0659	1.1159	0.9241	1.2416	0.98882	0.98713	0.9991	0.95205	1.3699	1.196	Q8WVM7	11	6	6	Cohesin subunit SA-1	STAG1	sp|Q8WVM7|STAG1_HUMAN Cohesin subunit SA-1 OS=Homo sapiens OX=9606 GN=STAG1 PE=1 SV=3	1	11	6	6	6	5	5	6	3	3	7	7	7	3	2	2	2	2	2	2	3	3	3	1	2	2	2	2	2	2
Q9Y5Y6	Suppressor of tumorigenicity 14 protein	ST14	0.99249	1.0353	1.0055	1.0631	1.1204	1.1723	1.353	1.3246	1.0285	0.99321	Q9Y5Y6	19	19	19	Suppressor of tumorigenicity 14 protein	ST14	sp|Q9Y5Y6|ST14_HUMAN Suppressor of tumorigenicity 14 protein OS=Homo sapiens OX=9606 GN=ST14 PE=1 SV=2	1	19	19	19	14	15	13	11	3	3	10	11	12	12	14	15	13	11	3	3	10	11	12	12	14	15	13	11	3	3
P50502;Q8NFI4;Q8IZP2	Hsc70-interacting protein;Putative protein FAM10A5	ST13;ST13P5	0.99176	0.99643	1.0508	0.96115	0.96218	1.014	1.1721	1.1542	1.1174	1.1943	P50502;Q8NFI4	22;15;8	22;15;8	22;15;8	Hsc70-interacting protein;Putative protein FAM10A5	ST13;ST13P5	sp|P50502|F10A1_HUMAN Hsc70-interacting protein OS=Homo sapiens OX=9606 GN=ST13 PE=1 SV=2;sp|Q8NFI4|F10A5_HUMAN Putative protein FAM10A5 OS=Homo sapiens OX=9606 GN=ST13P5 PE=5 SV=1	3	22	22	22	9	8	9	10	18	15	9	9	8	8	9	8	9	10	18	15	9	9	8	8	9	8	9	10	18	15
Q9NP77	RNA polymerase II subunit A C-terminal domain phosphatase SSU72	SSU72	0.92864	0.93654	0.87535	0.90707	0.9801	0.8834	0.88183	0.87103	0.97292	0.93089	Q9NP77	9	9	9	RNA polymerase II subunit A C-terminal domain phosphatase SSU72	SSU72	sp|Q9NP77|SSU72_HUMAN RNA polymerase II subunit A C-terminal domain phosphatase SSU72 OS=Homo sapiens OX=9606 GN=SSU72 PE=1 SV=1	1	9	9	9	2	5	5	4	1	3	4	3	4	7	2	5	5	4	1	3	4	3	4	7	2	5	5	4	1	3
O60232	Sjoegren syndrome/scleroderma autoantigen 1	SSSCA1	0.93964	0.95495	0.97896	0.92004	0.98896	0.98484	0.79702	0.79294	1.0151	1.1114	O60232	13	13	13	Sjoegren syndrome/scleroderma autoantigen 1	SSSCA1	sp|O60232|SSA27_HUMAN Sjoegren syndrome/scleroderma autoantigen 1 OS=Homo sapiens OX=9606 GN=SSSCA1 PE=1 SV=1	1	13	13	13	8	7	9	9	5	5	8	9	9	8	8	7	9	9	5	5	8	9	9	8	8	7	9	9	5	5
Q08945	FACT complex subunit SSRP1	SSRP1	1.003	1.0051	1.007	1.0144	1.0042	0.99215	0.93376	0.92747	1.0494	1.0382	Q08945	35	35	35	FACT complex subunit SSRP1	SSRP1	sp|Q08945|SSRP1_HUMAN FACT complex subunit SSRP1 OS=Homo sapiens OX=9606 GN=SSRP1 PE=1 SV=1	1	35	35	35	23	21	19	20	26	28	20	20	21	20	23	21	19	20	26	28	20	20	21	20	23	21	19	20	26	28
P51571	Translocon-associated protein subunit delta	SSR4	1.0734	1.0886	1.009	1.0501	1.0469	1.055	0.91328	0.88193	1.0194	1.0799	P51571	6	6	6	Translocon-associated protein subunit delta	SSR4	sp|P51571|SSRD_HUMAN Translocon-associated protein subunit delta OS=Homo sapiens OX=9606 GN=SSR4 PE=1 SV=1	1	6	6	6	4	3	4	4	3	5	3	4	4	4	4	3	4	4	3	5	3	4	4	4	4	3	4	4	3	5
Q9UNL2	Translocon-associated protein subunit gamma	SSR3	1.0521	1.136	1.0317	1.0513	1.1222	1.0818	1.016	0.94417	1.0302	1.0213	Q9UNL2	1	1	1	Translocon-associated protein subunit gamma	SSR3	sp|Q9UNL2|SSRG_HUMAN Translocon-associated protein subunit gamma OS=Homo sapiens OX=9606 GN=SSR3 PE=1 SV=1	1	1	1	1	1	1	1	1	1	1	1	1	1	1	1	1	1	1	1	1	1	1	1	1	1	1	1	1	1	1
P43307	Translocon-associated protein subunit alpha	SSR1	1.0133	1.0003	1.0789	0.97471	0.94218	1.0247	1.063	1.0556	0.84541	0.90914	P43307	5	5	5	Translocon-associated protein subunit alpha	SSR1	sp|P43307|SSRA_HUMAN Translocon-associated protein subunit alpha OS=Homo sapiens OX=9606 GN=SSR1 PE=1 SV=3	1	5	5	5	4	4	4	4	3	3	5	4	3	4	4	4	4	4	3	3	5	4	3	4	4	4	4	4	3	3
O43805	Sjoegren syndrome nuclear autoantigen 1	SSNA1	0.64394	0.51246	0.71879	NaN	0.76461	0.59775	0.54896	0.49405	NaN	NaN	O43805	2	2	2	Sjoegren syndrome nuclear autoantigen 1	SSNA1	sp|O43805|SSNA1_HUMAN Sjoegren syndrome nuclear autoantigen 1 OS=Homo sapiens OX=9606 GN=SSNA1 PE=1 SV=2	1	2	2	2	1	0	1	1	0	1	1	1	1	1	1	0	1	1	0	1	1	1	1	1	1	0	1	1	0	1
Q8TE77	Protein phosphatase Slingshot homolog 3	SSH3	0.82798	0.92563	1.1275	0.86472	1.0529	NaN	1.2693	NaN	NaN	NaN	Q8TE77	3	3	3	Protein phosphatase Slingshot homolog 3	SSH3	sp|Q8TE77|SSH3_HUMAN Protein phosphatase Slingshot homolog 3 OS=Homo sapiens OX=9606 GN=SSH3 PE=1 SV=2	1	3	3	3	3	3	1	0	0	0	1	0	1	2	3	3	1	0	0	0	1	0	1	2	3	3	1	0	0	0
Q8WYL5	Protein phosphatase Slingshot homolog 1	SSH1	NaN	NaN	1.7287	1.2292	NaN	1.3426	NaN	NaN	NaN	NaN	Q8WYL5	2	2	2	Protein phosphatase Slingshot homolog 1	SSH1	sp|Q8WYL5|SSH1_HUMAN Protein phosphatase Slingshot homolog 1 OS=Homo sapiens OX=9606 GN=SSH1 PE=1 SV=2	1	2	2	2	1	1	0	0	0	1	0	1	0	0	1	1	0	0	0	1	0	1	0	0	1	1	0	0	0	1
P28290	Sperm-specific antigen 2	SSFA2	0.97464	0.99478	1.0017	1.006	0.96033	0.96811	1.0156	0.98711	0.94329	0.8592	P28290	57	57	57	Sperm-specific antigen 2	SSFA2	sp|P28290|ITPI2_HUMAN Protein ITPRID2 OS=Homo sapiens OX=9606 GN=ITPRID2 PE=1 SV=3	1	57	57	57	40	43	40	44	27	30	37	39	44	42	40	43	40	44	27	30	37	39	44	42	40	43	40	44	27	30
Q9BWG4	Single-stranded DNA-binding protein 4	SSBP4	NaN	1.7491	NaN	NaN	NaN	2.3895	NaN	NaN	NaN	NaN	Q9BWG4	1	1	1	Single-stranded DNA-binding protein 4	SSBP4	sp|Q9BWG4|SSBP4_HUMAN Single-stranded DNA-binding protein 4 OS=Homo sapiens OX=9606 GN=SSBP4 PE=1 SV=1	1	1	1	1	0	0	0	0	0	0	0	1	0	1	0	0	0	0	0	0	0	1	0	1	0	0	0	0	0	0
Q04837	Single-stranded DNA-binding protein, mitochondrial	SSBP1	1.0378	1.0017	1.0135	1.0199	1.0896	1.034	1.0244	1.0262	0.89508	0.90087	Q04837	13	13	13	Single-stranded DNA-binding protein, mitochondrial	SSBP1	sp|Q04837|SSBP_HUMAN Single-stranded DNA-binding protein, mitochondrial OS=Homo sapiens OX=9606 GN=SSBP1 PE=1 SV=1	1	13	13	13	5	5	5	5	9	11	5	5	5	5	5	5	5	5	9	11	5	5	5	5	5	5	5	5	9	11
P05455	Lupus La protein	SSB	0.98893	0.95982	0.95019	0.96361	0.90929	0.90882	0.82349	0.81831	0.86395	0.84896	P05455	43	43	43	Lupus La protein	SSB	sp|P05455|LA_HUMAN Lupus La protein OS=Homo sapiens OX=9606 GN=SSB PE=1 SV=2	1	43	43	43	19	20	20	21	26	27	20	24	20	20	19	20	20	21	26	27	20	24	20	20	19	20	20	21	26	27
Q15532	Protein SSXT	SS18	0.92661	1.0986	1.0197	1.1818	1.2558	1.1022	0.99073	1.2028	1.2716	1.0745	Q15532	3	3	3	Protein SSXT	SS18	sp|Q15532|SSXT_HUMAN Protein SSXT OS=Homo sapiens OX=9606 GN=SS18 PE=1 SV=3	1	3	3	3	1	1	1	1	1	2	1	1	1	1	1	1	1	1	1	2	1	1	1	1	1	1	1	1	1	2
Q9BYN0	Sulfiredoxin-1	SRXN1	1.001	0.91905	0.83642	0.80122	0.89736	0.75151	0.87325	0.90306	NaN	0.90439	Q9BYN0	10	10	10	Sulfiredoxin-1	SRXN1	sp|Q9BYN0|SRXN1_HUMAN Sulfiredoxin-1 OS=Homo sapiens OX=9606 GN=SRXN1 PE=1 SV=2	1	10	10	10	8	8	9	8	0	3	7	6	9	8	8	8	9	8	0	3	7	6	9	8	8	8	9	8	0	3
Q13242	Serine/arginine-rich splicing factor 9	SRSF9	0.98987	0.98154	1.0244	0.97935	0.98363	0.96365	0.96397	0.94261	0.99034	0.99813	Q13242	19	18	18	Serine/arginine-rich splicing factor 9	SRSF9	sp|Q13242|SRSF9_HUMAN Serine/arginine-rich splicing factor 9 OS=Homo sapiens OX=9606 GN=SRSF9 PE=1 SV=1	1	19	18	18	10	11	11	10	15	15	10	10	11	11	9	10	10	9	14	14	9	9	10	10	9	10	10	9	14	14
Q9BRL6	Serine/arginine-rich splicing factor 8	SRSF8	0.84786	0.90795	0.87447	1.087	0.94761	1.0932	0.8244	0.88234	0.91931	1.0015	Q9BRL6	5	3	3	Serine/arginine-rich splicing factor 8	SRSF8	sp|Q9BRL6|SRSF8_HUMAN Serine/arginine-rich splicing factor 8 OS=Homo sapiens OX=9606 GN=SRSF8 PE=1 SV=1	1	5	3	3	4	3	4	4	5	4	3	3	4	4	2	1	2	2	3	2	1	1	2	2	2	1	2	2	3	2
Q16629	Serine/arginine-rich splicing factor 7	SRSF7	0.90806	0.9355	0.93509	0.91104	0.87324	0.9067	0.93433	0.89833	1.0145	1.0496	Q16629	11	10	10	Serine/arginine-rich splicing factor 7	SRSF7	sp|Q16629|SRSF7_HUMAN Serine/arginine-rich splicing factor 7 OS=Homo sapiens OX=9606 GN=SRSF7 PE=1 SV=1	1	11	10	10	6	7	8	8	7	6	6	5	6	7	5	6	7	7	6	5	5	4	5	6	5	6	7	7	6	5
Q13247	Serine/arginine-rich splicing factor 6	SRSF6	0.97722	1.0261	0.96287	1.0021	0.95986	0.94493	0.94307	0.95951	1.0972	1.0874	Q13247	18	18	14	Serine/arginine-rich splicing factor 6	SRSF6	sp|Q13247|SRSF6_HUMAN Serine/arginine-rich splicing factor 6 OS=Homo sapiens OX=9606 GN=SRSF6 PE=1 SV=2	1	18	18	14	10	9	11	9	13	12	10	10	11	11	10	9	11	9	13	12	10	10	11	11	6	5	7	5	10	9
Q13243	Serine/arginine-rich splicing factor 5	SRSF5	0.90624	0.90451	1.042	0.87209	0.97452	0.98102	0.90453	0.91743	1.1686	1.0901	Q13243	10	9	9	Serine/arginine-rich splicing factor 5	SRSF5	sp|Q13243|SRSF5_HUMAN Serine/arginine-rich splicing factor 5 OS=Homo sapiens OX=9606 GN=SRSF5 PE=1 SV=1	1	10	9	9	6	6	6	6	8	8	6	6	6	6	5	5	5	5	7	7	5	5	5	5	5	5	5	5	7	7
Q08170	Serine/arginine-rich splicing factor 4	SRSF4	1.282	1.2807	1.0192	1.5095	1.2201	1.2143	0.9195	1.3845	1.0194	1.2015	Q08170	13	9	9	Serine/arginine-rich splicing factor 4	SRSF4	sp|Q08170|SRSF4_HUMAN Serine/arginine-rich splicing factor 4 OS=Homo sapiens OX=9606 GN=SRSF4 PE=1 SV=2	1	13	9	9	5	7	6	6	8	7	7	6	6	6	1	3	2	2	5	4	3	2	2	2	1	3	2	2	5	4
P84103	Serine/arginine-rich splicing factor 3	SRSF3	0.95062	0.96454	1.0066	0.93508	0.94122	0.9671	0.95676	0.98891	1.0624	1.0669	P84103	13	13	12	Serine/arginine-rich splicing factor 3	SRSF3	sp|P84103|SRSF3_HUMAN Serine/arginine-rich splicing factor 3 OS=Homo sapiens OX=9606 GN=SRSF3 PE=1 SV=1	1	13	13	12	6	6	6	6	10	11	6	6	6	7	6	6	6	6	10	11	6	6	6	7	5	5	5	5	9	10
Q01130	Serine/arginine-rich splicing factor 2	SRSF2	0.95829	0.94678	1.0061	0.91958	0.85494	0.96996	0.90811	0.96529	1.0043	1.0084	Q01130	10	10	8	Serine/arginine-rich splicing factor 2	SRSF2	sp|Q01130|SRSF2_HUMAN Serine/arginine-rich splicing factor 2 OS=Homo sapiens OX=9606 GN=SRSF2 PE=1 SV=4	1	10	10	8	6	5	5	5	8	7	5	5	5	6	6	5	5	5	8	7	5	5	5	6	4	3	3	3	6	5
Q05519	Serine/arginine-rich splicing factor 11	SRSF11	0.99272	0.98717	1.0044	0.96339	0.90193	0.93528	0.9209	0.96554	1.0488	0.97576	Q05519	9	9	9	Serine/arginine-rich splicing factor 11	SRSF11	sp|Q05519|SRS11_HUMAN Serine/arginine-rich splicing factor 11 OS=Homo sapiens OX=9606 GN=SRSF11 PE=1 SV=1	1	9	9	9	7	6	8	7	6	5	6	7	6	6	7	6	8	7	6	5	6	7	6	6	7	6	8	7	6	5
O75494;Q8WXF0	Serine/arginine-rich splicing factor 10	SRSF10	0.98497	1.0161	0.95244	0.90224	0.84587	0.75689	0.88869	0.62831	0.84916	0.84162	O75494	9;3	9;3	9;3	Serine/arginine-rich splicing factor 10	SRSF10	sp|O75494|SRS10_HUMAN Serine/arginine-rich splicing factor 10 OS=Homo sapiens OX=9606 GN=SRSF10 PE=1 SV=1	2	9	9	9	5	4	4	3	6	5	3	4	5	5	5	4	4	3	6	5	3	4	5	5	5	4	4	3	6	5
Q07955	Serine/arginine-rich splicing factor 1	SRSF1	0.93938	0.96273	1.0114	0.928	0.91571	0.97286	1.0634	1.0622	1.0399	0.99857	Q07955	25	25	24	Serine/arginine-rich splicing factor 1	SRSF1	sp|Q07955|SRSF1_HUMAN Serine/arginine-rich splicing factor 1 OS=Homo sapiens OX=9606 GN=SRSF1 PE=1 SV=2	1	25	25	24	11	12	12	14	17	18	12	13	13	13	11	12	12	14	17	18	12	13	13	13	10	11	11	13	16	17
Q9BXP5;REV__Q8IWL3	Serrate RNA effector molecule homolog	SRRT	0.99874	1.0033	0.99472	0.97235	0.94956	0.96735	0.95369	0.94648	1.1275	1.1367	Q9BXP5	49;1	49;1	48;0	Serrate RNA effector molecule homolog	SRRT	sp|Q9BXP5|SRRT_HUMAN Serrate RNA effector molecule homolog OS=Homo sapiens OX=9606 GN=SRRT PE=1 SV=1	2	49	49	48	28	31	30	30	19	25	31	32	29	31	28	31	30	30	19	25	31	32	29	31	27	30	29	29	19	24
Q9UQ35	Serine/arginine repetitive matrix protein 2	SRRM2	0.92508	0.95147	1.0013	0.93785	0.86355	0.89264	0.80005	0.81881	0.9401	0.92972	Q9UQ35	52	52	52	Serine/arginine repetitive matrix protein 2	SRRM2	sp|Q9UQ35|SRRM2_HUMAN Serine/arginine repetitive matrix protein 2 OS=Homo sapiens OX=9606 GN=SRRM2 PE=1 SV=2	1	52	52	52	39	37	37	34	23	25	37	36	39	39	39	37	37	34	23	25	37	36	39	39	39	37	37	34	23	25
Q8IYB3	Serine/arginine repetitive matrix protein 1	SRRM1	0.95616	0.95288	1.0045	0.94507	0.93507	0.91586	1.0071	1.0162	1.0019	1.0702	Q8IYB3	12	12	12	Serine/arginine repetitive matrix protein 1	SRRM1	sp|Q8IYB3|SRRM1_HUMAN Serine/arginine repetitive matrix protein 1 OS=Homo sapiens OX=9606 GN=SRRM1 PE=1 SV=2	1	12	12	12	8	9	10	9	4	5	10	8	7	7	8	9	10	9	4	5	10	8	7	7	8	9	10	9	4	5
Q9GZT4	Serine racemase	SRR	NaN	NaN	NaN	NaN	NaN	NaN	NaN	NaN	1.8906	NaN	Q9GZT4	2	2	2	Serine racemase	SRR	sp|Q9GZT4|SRR_HUMAN Serine racemase OS=Homo sapiens OX=9606 GN=SRR PE=1 SV=1	1	2	2	2	0	0	0	0	2	0	0	0	0	0	0	0	0	0	2	0	0	0	0	0	0	0	0	0	2	0
Q9Y5M8	Signal recognition particle receptor subunit beta	SRPRB	0.96244	0.97786	0.91732	0.97967	1.0359	0.98223	0.96045	0.99664	1.0586	1.0075	Q9Y5M8	20	20	20	Signal recognition particle receptor subunit beta	SRPRB	sp|Q9Y5M8|SRPRB_HUMAN Signal recognition particle receptor subunit beta OS=Homo sapiens OX=9606 GN=SRPRB PE=1 SV=3	1	20	20	20	10	10	10	8	13	12	8	10	11	13	10	10	10	8	13	12	8	10	11	13	10	10	10	8	13	12
P08240	Signal recognition particle receptor subunit alpha	SRPR	1.0057	1.1657	1.0463	0.97317	1.0324	1.0332	1.2058	1.1036	1.1264	1.2046	P08240	24	24	24	Signal recognition particle receptor subunit alpha	SRPR	sp|P08240|SRPRA_HUMAN Signal recognition particle receptor subunit alpha OS=Homo sapiens OX=9606 GN=SRPRA PE=1 SV=2	1	24	24	24	14	14	14	16	4	5	13	12	17	13	14	14	14	16	4	5	13	12	17	13	14	14	14	16	4	5
P78362;Q9UPE1	SRSF protein kinase 2;SRSF protein kinase 2 N-terminal;SRSF protein kinase 2 C-terminal	SRPK2	0.74012	1.0685	0.97052	0.91128	1.0034	0.90536	1.0336	1.0622	1.1599	0.90544	P78362	15;2	11;0	11;0	SRSF protein kinase 2;SRSF protein kinase 2 N-terminal;SRSF protein kinase 2 C-terminal	SRPK2	sp|P78362|SRPK2_HUMAN SRSF protein kinase 2 OS=Homo sapiens OX=9606 GN=SRPK2 PE=1 SV=3	2	15	11	11	6	5	7	5	5	2	5	4	6	10	4	3	4	3	5	2	3	2	3	7	4	3	4	3	5	2
Q96SB4	SRSF protein kinase 1	SRPK1	1.041	1.0335	1.0194	1.0217	1.0355	1.0347	0.88269	0.90655	0.94204	0.96707	Q96SB4	24	24	20	SRSF protein kinase 1	SRPK1	sp|Q96SB4|SRPK1_HUMAN SRSF protein kinase 1 OS=Homo sapiens OX=9606 GN=SRPK1 PE=1 SV=2	1	24	24	20	14	15	15	14	7	7	10	11	16	16	14	15	15	14	7	7	10	11	16	16	12	13	12	12	7	7
P49458	Signal recognition particle 9 kDa protein	SRP9	1.0478	1.0519	1.0333	1.0725	1.0491	1.1228	0.94044	0.95846	1.1263	1.1334	P49458	6	6	6	Signal recognition particle 9 kDa protein	SRP9	sp|P49458|SRP09_HUMAN Signal recognition particle 9 kDa protein OS=Homo sapiens OX=9606 GN=SRP9 PE=1 SV=2	1	6	6	6	4	4	4	4	5	4	4	4	4	4	4	4	4	4	5	4	4	4	4	4	4	4	4	4	5	4
O76094	Signal recognition particle subunit SRP72	SRP72	1.0627	1.0506	1.0341	1.0317	1.1373	1.1289	0.89821	0.87742	0.99264	0.94729	O76094	31	31	31	Signal recognition particle subunit SRP72	SRP72	sp|O76094|SRP72_HUMAN Signal recognition particle subunit SRP72 OS=Homo sapiens OX=9606 GN=SRP72 PE=1 SV=3	1	31	31	31	22	20	21	21	12	15	18	21	19	24	22	20	21	21	12	15	18	21	19	24	22	20	21	21	12	15
Q9UHB9	Signal recognition particle subunit SRP68	SRP68	0.97414	1.0287	1.0315	1.0532	1.0533	1.0226	0.9174	0.95347	0.90777	0.89309	Q9UHB9	31	31	31	Signal recognition particle subunit SRP68	SRP68	sp|Q9UHB9|SRP68_HUMAN Signal recognition particle subunit SRP68 OS=Homo sapiens OX=9606 GN=SRP68 PE=1 SV=2	1	31	31	31	17	14	16	19	15	18	16	20	20	19	17	14	16	19	15	18	16	20	20	19	17	14	16	19	15	18
P61011	Signal recognition particle 54 kDa protein	SRP54	0.93499	0.99696	0.93222	0.97646	0.99375	0.9928	0.89964	0.89359	0.98168	0.97124	P61011	30	30	30	Signal recognition particle 54 kDa protein	SRP54	sp|P61011|SRP54_HUMAN Signal recognition particle 54 kDa protein OS=Homo sapiens OX=9606 GN=SRP54 PE=1 SV=1	1	30	30	30	16	18	19	15	16	17	17	16	20	19	16	18	19	15	16	17	17	16	20	19	16	18	19	15	16	17
P09132	Signal recognition particle 19 kDa protein	SRP19	0.98582	0.97855	0.92385	0.93045	0.9918	0.98474	0.71979	0.83846	1.054	1.1185	P09132	5	5	5	Signal recognition particle 19 kDa protein	SRP19	sp|P09132|SRP19_HUMAN Signal recognition particle 19 kDa protein OS=Homo sapiens OX=9606 GN=SRP19 PE=1 SV=3	1	5	5	5	3	3	4	2	3	4	4	3	3	4	3	3	4	2	3	4	4	3	3	4	3	3	4	2	3	4
P37108	Signal recognition particle 14 kDa protein	SRP14	1.0605	1.0735	0.98108	1.0243	1.0106	1.1135	0.97781	0.98653	1.1411	1.1764	P37108	8	8	8	Signal recognition particle 14 kDa protein	SRP14	sp|P37108|SRP14_HUMAN Signal recognition particle 14 kDa protein OS=Homo sapiens OX=9606 GN=SRP14 PE=1 SV=2	1	8	8	8	6	6	6	6	6	6	5	6	6	6	6	6	6	6	6	6	5	6	6	6	6	6	6	6	6	6
P19623	Spermidine synthase	SRM	1.0138	1.0546	1.0042	1.0152	1.0385	1.0646	0.77254	0.78988	0.81836	0.86252	P19623	17	17	17	Spermidine synthase	SRM	sp|P19623|SPEE_HUMAN Spermidine synthase OS=Homo sapiens OX=9606 GN=SRM PE=1 SV=1	1	17	17	17	12	11	12	12	8	10	13	12	11	12	12	11	12	12	8	10	13	12	11	12	12	11	12	12	8	10
P30626	Sorcin	SRI	1.0016	0.96076	1.0383	0.96309	0.96787	0.96837	0.98024	1.0423	1.0663	1.0581	P30626	10	10	10	Sorcin	SRI	sp|P30626|SORCN_HUMAN Sorcin OS=Homo sapiens OX=9606 GN=SRI PE=1 SV=1	1	10	10	10	10	9	9	9	5	5	9	9	10	9	10	9	9	9	5	5	9	9	10	9	10	9	9	9	5	5
O75044;P0DMP2;P0DJJ0	SLIT-ROBO Rho GTPase-activating protein 2	SRGAP2	0.77869	1.1716	0.92424	1.24	NaN	NaN	1.293	1.1823	0.73593	0.94049	O75044	4;1;1	3;1;1	3;1;1	SLIT-ROBO Rho GTPase-activating protein 2	SRGAP2	sp|O75044|SRGP2_HUMAN SLIT-ROBO Rho GTPase-activating protein 2 OS=Homo sapiens OX=9606 GN=SRGAP2 PE=1 SV=3	3	4	3	3	3	2	2	1	2	2	0	0	1	2	3	2	2	1	1	1	0	0	1	2	3	2	2	1	1	1
Q7Z6B7	SLIT-ROBO Rho GTPase-activating protein 1	SRGAP1	0.84097	0.90519	0.80149	0.92225	1.0468	0.96662	1.1982	1.3499	0.73719	0.85093	Q7Z6B7	8	8	7	SLIT-ROBO Rho GTPase-activating protein 1	SRGAP1	sp|Q7Z6B7|SRGP1_HUMAN SLIT-ROBO Rho GTPase-activating protein 1 OS=Homo sapiens OX=9606 GN=SRGAP1 PE=1 SV=1	1	8	8	7	4	4	4	3	2	1	2	1	3	3	4	4	4	3	2	1	2	1	3	3	4	4	4	3	1	0
Q8NEF9	Serum response factor-binding protein 1	SRFBP1	0.85117	1.167	1.0306	0.90286	1.0047	1.0582	1.1187	0.96958	NaN	1.6967	Q8NEF9	7	7	7	Serum response factor-binding protein 1	SRFBP1	sp|Q8NEF9|SRFB1_HUMAN Serum response factor-binding protein 1 OS=Homo sapiens OX=9606 GN=SRFBP1 PE=1 SV=1	1	7	7	7	1	1	1	1	5	3	2	1	1	1	1	1	1	1	5	3	2	1	1	1	1	1	1	1	5	3
Q8WXA9	Splicing regulatory glutamine/lysine-rich protein 1	SREK1	1.0256	0.93651	0.99767	1.0138	0.87819	1.0846	1.0328	1.0171	0.87016	0.94689	Q8WXA9	8	8	8	Splicing regulatory glutamine/lysine-rich protein 1	SREK1	sp|Q8WXA9|SREK1_HUMAN Splicing regulatory glutamine/lysine-rich protein 1 OS=Homo sapiens OX=9606 GN=SREK1 PE=1 SV=1	1	8	8	8	5	6	5	5	4	4	5	5	5	6	5	6	5	5	4	4	5	5	5	6	5	6	5	5	4	4
A0A0C4DFX4;Q6ZRS2	Helicase SRCAP	SRCAP	0.80353	NaN	1.004	1.0832	1.4328	1.0614	1.1487	1.2454	1.0656	0.79951	A0A0C4DFX4;Q6ZRS2	5;5	5;5	5;5	Helicase SRCAP	SRCAP	tr|A0A0C4DFX4|A0A0C4DFX4_HUMAN Uncharacterized protein (Fragment) OS=Homo sapiens OX=9606 PE=4 SV=1;sp|Q6ZRS2|SRCAP_HUMAN Helicase SRCAP OS=Homo sapiens OX=9606 GN=SRCAP PE=1 SV=3	2	5	5	5	2	2	2	1	2	1	1	2	1	0	2	2	2	1	2	1	1	2	1	0	2	2	2	1	2	1
P12931;P42685	Proto-oncogene tyrosine-protein kinase Src	SRC	1.2075	1.0615	1.0177	1.0197	0.96762	0.90453	0.99674	1.0743	1.228	1.2499	P12931	15;1	9;1	8;0	Proto-oncogene tyrosine-protein kinase Src	SRC	sp|P12931|SRC_HUMAN Proto-oncogene tyrosine-protein kinase Src OS=Homo sapiens OX=9606 GN=SRC PE=1 SV=3	2	15	9	8	6	6	5	6	5	4	4	6	6	6	2	3	2	3	3	3	2	3	3	3	2	2	2	2	3	3
Q8N5C6	S1 RNA-binding domain-containing protein 1	SRBD1	1.164	0.9325	1.1504	0.9979	1.0553	0.81436	0.96529	0.81918	0.8179	0.88666	Q8N5C6	16	16	16	S1 RNA-binding domain-containing protein 1	SRBD1	sp|Q8N5C6|SRBD1_HUMAN S1 RNA-binding domain-containing protein 1 OS=Homo sapiens OX=9606 GN=SRBD1 PE=1 SV=2	1	16	16	16	5	6	6	5	5	4	6	7	9	8	5	6	6	5	5	4	6	7	9	8	5	6	6	5	5	4
Q9HD15	Steroid receptor RNA activator 1	SRA1	0.94285	0.90015	0.89187	0.83431	0.83816	0.84979	0.89447	0.99064	1.0411	1.0203	Q9HD15	8	8	8	Steroid receptor RNA activator 1	SRA1	sp|Q9HD15|SRA1_HUMAN Steroid receptor RNA activator 1 OS=Homo sapiens OX=9606 GN=SRA1 PE=1 SV=1	1	8	8	8	4	4	5	4	3	2	5	6	5	6	4	4	5	4	3	2	5	6	5	6	4	4	5	4	3	2
Q13501	Sequestosome-1	SQSTM1	0.93691	0.9494	0.83736	0.85784	0.7485	0.69828	0.60779	0.63357	0.99348	0.99371	Q13501	19	19	19	Sequestosome-1	SQSTM1	sp|Q13501|SQSTM_HUMAN Sequestosome-1 OS=Homo sapiens OX=9606 GN=SQSTM1 PE=1 SV=1	1	19	19	19	14	12	14	14	8	9	8	11	14	12	14	12	14	14	8	9	8	11	14	12	14	12	14	14	8	9
Q9Y6N5;H3BNX3	Sulfide:quinone oxidoreductase, mitochondrial	SQRDL	0.92335	0.91949	0.97704	1.0793	1.1198	1.1354	1.6489	1.6801	0.54573	0.56933	Q9Y6N5	16;7	16;7	16;7	Sulfide:quinone oxidoreductase, mitochondrial	SQRDL	sp|Q9Y6N5|SQOR_HUMAN Sulfide:quinone oxidoreductase, mitochondrial OS=Homo sapiens OX=9606 GN=SQOR PE=1 SV=1	2	16	16	16	10	11	10	9	2	5	10	11	6	9	10	11	10	9	2	5	10	11	6	9	10	11	10	9	2	5
Q14534	Squalene monooxygenase	SQLE	0.69049	0.97729	0.75012	0.98372	NaN	NaN	2.3587	2.5944	NaN	NaN	Q14534	6	6	6	Squalene monooxygenase	SQLE	sp|Q14534|ERG1_HUMAN Squalene monooxygenase OS=Homo sapiens OX=9606 GN=SQLE PE=1 SV=3	1	6	6	6	3	5	2	1	0	0	0	0	1	1	3	5	2	1	0	0	0	0	1	1	3	5	2	1	0	0
Q68D10	Protein SPT2 homolog	SPTY2D1	0.90235	0.87402	0.85982	0.8935	0.93102	0.84089	0.93926	0.79535	0.79394	0.99505	Q68D10	14	14	14	Protein SPT2 homolog	SPTY2D1	sp|Q68D10|SPT2_HUMAN Protein SPT2 homolog OS=Homo sapiens OX=9606 GN=SPTY2D1 PE=1 SV=3	1	14	14	14	9	6	8	5	4	3	8	6	11	11	9	6	8	5	4	3	8	6	11	11	9	6	8	5	4	3
O15270	Serine palmitoyltransferase 2	SPTLC2	1.0994	1.0116	1.0257	0.90724	0.98496	1.0527	1.2248	1.1518	1.1574	1.1602	O15270	16	16	16	Serine palmitoyltransferase 2	SPTLC2	sp|O15270|SPTC2_HUMAN Serine palmitoyltransferase 2 OS=Homo sapiens OX=9606 GN=SPTLC2 PE=1 SV=1	1	16	16	16	7	6	5	7	6	6	5	8	7	5	7	6	5	7	6	6	5	8	7	5	7	6	5	7	6	6
O15269	Serine palmitoyltransferase 1	SPTLC1	1.1316	1.0577	1.0961	1.1878	1.048	1.082	1.1757	1.2839	1.0467	1.0884	O15269	19	19	19	Serine palmitoyltransferase 1	SPTLC1	sp|O15269|SPTC1_HUMAN Serine palmitoyltransferase 1 OS=Homo sapiens OX=9606 GN=SPTLC1 PE=1 SV=1	1	19	19	19	9	11	9	7	7	6	7	9	11	9	9	11	9	7	7	6	7	9	11	9	9	11	9	7	7	6
O15020	Spectrin beta chain, non-erythrocytic 2	SPTBN2	1.0718	0.94303	1.0655	0.91438	0.99219	0.90257	0.93428	0.90348	NaN	1.0446	O15020	13	5	5	Spectrin beta chain, non-erythrocytic 2	SPTBN2	sp|O15020|SPTN2_HUMAN Spectrin beta chain, non-erythrocytic 2 OS=Homo sapiens OX=9606 GN=SPTBN2 PE=1 SV=3	1	13	5	5	9	7	6	9	2	2	8	9	6	7	4	2	2	2	0	1	3	3	2	2	4	2	2	2	0	1
Q01082;P11277;Q86UT5	Spectrin beta chain, non-erythrocytic 1	SPTBN1	0.98745	0.96707	1.0155	0.98032	0.95567	0.98729	1.0168	1.0731	1.1076	1.1301	Q01082	131;8;1	131;8;1	122;3;1	Spectrin beta chain, non-erythrocytic 1	SPTBN1	sp|Q01082|SPTB2_HUMAN Spectrin beta chain, non-erythrocytic 1 OS=Homo sapiens OX=9606 GN=SPTBN1 PE=1 SV=2	3	131	131	122	87	82	86	84	62	54	85	89	84	83	87	82	86	84	62	54	85	89	84	83	82	77	81	77	60	53
Q13813	Spectrin alpha chain, non-erythrocytic 1	SPTAN1	1.0027	0.98386	1.0543	0.95673	0.92886	1.0105	1.0843	1.1087	1.0562	1.0431	Q13813	151	151	151	Spectrin alpha chain, non-erythrocytic 1	SPTAN1	sp|Q13813|SPTN1_HUMAN Spectrin alpha chain, non-erythrocytic 1 OS=Homo sapiens OX=9606 GN=SPTAN1 PE=1 SV=3	1	151	151	151	104	98	101	94	49	46	94	96	97	96	104	98	101	94	49	46	94	96	97	96	104	98	101	94	49	46
Q5W111	SPRY domain-containing protein 7	SPRYD7	1.1314	1.0805	1.1221	1.0974	1.0829	1.0491	1.2168	1.3341	1.6887	0.77073	Q5W111	6	6	6	SPRY domain-containing protein 7	SPRYD7	sp|Q5W111|SPRY7_HUMAN SPRY domain-containing protein 7 OS=Homo sapiens OX=9606 GN=SPRYD7 PE=1 SV=2	1	6	6	6	4	5	4	5	3	3	5	5	4	5	4	5	4	5	3	3	5	5	4	5	4	5	4	5	3	3
Q9C004	Protein sprouty homolog 4	SPRY4	0.98988	1.4019	0.99335	1.0241	1.1192	1.0592	1.8545	2.3367	1.1288	0.72456	Q9C004	7	7	7	Protein sprouty homolog 4	SPRY4	sp|Q9C004|SPY4_HUMAN Protein sprouty homolog 4 OS=Homo sapiens OX=9606 GN=SPRY4 PE=1 SV=2	1	7	7	7	5	5	3	6	2	2	4	6	4	2	5	5	3	6	2	2	4	6	4	2	5	5	3	6	2	2
P35325;P22532;P35326;P22531;Q9BYE4	Small proline-rich protein 2B;Small proline-rich protein 2D;Small proline-rich protein 2A;Small proline-rich protein 2E;Small proline-rich protein 2G	SPRR2B;SPRR2D;SPRR2A;SPRR2E;SPRR2G	1.3498	NaN	NaN	NaN	1.5779	1.3137	NaN	NaN	NaN	NaN	P35325;P22532;P35326;P22531;Q9BYE4	2;2;1;1;1	2;2;1;1;1	2;2;1;1;1	Small proline-rich protein 2B;Small proline-rich protein 2D;Small proline-rich protein 2A;Small proline-rich protein 2E;Small proline-rich protein 2G	SPRR2B;SPRR2D;SPRR2A;SPRR2E;SPRR2G	sp|P35325|SPR2B_HUMAN Small proline-rich protein 2B OS=Homo sapiens OX=9606 GN=SPRR2B PE=2 SV=1;sp|P22532|SPR2D_HUMAN Small proline-rich protein 2D OS=Homo sapiens OX=9606 GN=SPRR2D PE=2 SV=2;sp|P35326|SPR2A_HUMAN Small proline-rich protein 2A OS=Homo sapi	5	2	2	2	0	0	0	0	0	0	2	2	1	0	0	0	0	0	0	0	2	2	1	0	0	0	0	0	0	0
P35270;REV__Q16649	Sepiapterin reductase	SPR	1.0029	0.94078	1.0229	0.95051	0.96669	1.0248	1.2568	1.3744	0.99521	1.0208	P35270	13;1	13;1	13;1	Sepiapterin reductase	SPR	sp|P35270|SPRE_HUMAN Sepiapterin reductase OS=Homo sapiens OX=9606 GN=SPR PE=1 SV=1	2	13	13	13	6	8	7	6	8	10	7	9	7	7	6	8	7	6	8	10	7	9	7	7	6	8	7	6	8	10
O43291;K7EQZ3	Kunitz-type protease inhibitor 2	SPINT2	0.83384	0.8837	0.94712	0.87968	0.88216	0.84625	1.2128	1.113	0.94037	0.89341	O43291;K7EQZ3	7;4	7;4	7;4	Kunitz-type protease inhibitor 2	SPINT2	sp|O43291|SPIT2_HUMAN Kunitz-type protease inhibitor 2 OS=Homo sapiens OX=9606 GN=SPINT2 PE=1 SV=2;tr|K7EQZ3|K7EQZ3_HUMAN Uncharacterized protein (Fragment) OS=Homo sapiens OX=9606 PE=4 SV=1	2	7	7	7	7	6	6	6	3	4	4	5	6	7	7	6	6	6	3	4	4	5	6	7	7	6	6	6	3	4
O43278	Kunitz-type protease inhibitor 1	SPINT1	1.0872	1.0759	1.0474	0.96878	1.0379	1.0303	1.2672	1.2991	0.85346	0.80255	O43278	16	16	16	Kunitz-type protease inhibitor 1	SPINT1	sp|O43278|SPIT1_HUMAN Kunitz-type protease inhibitor 1 OS=Homo sapiens OX=9606 GN=SPINT1 PE=1 SV=2	1	16	16	16	10	9	11	10	6	4	10	11	10	10	10	9	11	10	6	4	10	11	10	10	10	9	11	10	6	4
Q9Y657	Spindlin-1	SPIN1	0.96388	0.95463	0.90968	0.95439	0.89611	0.92044	1.3309	1.2217	0.81316	1.0096	Q9Y657	7	7	6	Spindlin-1	SPIN1	sp|Q9Y657|SPIN1_HUMAN Spindlin-1 OS=Homo sapiens OX=9606 GN=SPIN1 PE=1 SV=3	1	7	7	6	2	2	2	2	1	4	4	3	2	2	2	2	2	2	1	4	4	3	2	2	2	2	2	2	1	4
Q9NZD8	Maspardin	SPG21	0.9588	0.9192	1.0706	0.95727	1.0409	0.99332	0.53835	1.3661	0.97612	NaN	Q9NZD8	4	4	4	Maspardin	SPG21	sp|Q9NZD8|SPG21_HUMAN Maspardin OS=Homo sapiens OX=9606 GN=SPG21 PE=1 SV=1	1	4	4	4	3	2	2	1	1	1	1	1	2	3	3	2	2	1	1	1	1	1	2	3	3	2	2	1	1	1
Q96T58	Msx2-interacting protein	SPEN	0.9201	0.90032	0.88351	NaN	1.0015	1.0587	1.1631	1.1441	1.2829	NaN	Q96T58	8	8	8	Msx2-interacting protein	SPEN	sp|Q96T58|MINT_HUMAN Msx2-interacting protein OS=Homo sapiens OX=9606 GN=SPEN PE=1 SV=1	1	8	8	8	2	0	3	4	2	1	4	1	3	3	2	0	3	4	2	1	4	1	3	3	2	0	3	4	2	1
Q69YQ0;F8WAN1	Cytospin-A	SPECC1L;SPECC1L-ADORA2A	1.0959	0.87324	1.3329	1.0459	0.98254	1.1363	1.5298	1.3778	1.8355	NaN	Q69YQ0;F8WAN1	8;7	8;7	8;7	Cytospin-A	SPECC1L;SPECC1L-ADORA2A	sp|Q69YQ0|CYTSA_HUMAN Cytospin-A OS=Homo sapiens OX=9606 GN=SPECC1L PE=1 SV=2;tr|F8WAN1|F8WAN1_HUMAN SPECC1L-ADORA2A readthrough (NMD candidate) OS=Homo sapiens OX=9606 GN=SPECC1L-ADORA2A PE=4 SV=2	2	8	8	8	4	3	3	2	1	0	5	2	3	3	4	3	3	2	1	0	5	2	3	3	4	3	3	2	1	0
Q5M775	Cytospin-B	SPECC1	1.0412	1.7305	1.2238	NaN	NaN	3.0941	1.0684	1.1138	NaN	0.6782	Q5M775	4	4	4	Cytospin-B	SPECC1	sp|Q5M775|CYTSB_HUMAN Cytospin-B OS=Homo sapiens OX=9606 GN=SPECC1 PE=1 SV=1	1	4	4	4	2	1	2	3	0	1	1	1	2	2	2	1	2	3	0	1	1	1	2	2	2	1	2	3	0	1
Q96EA4	Protein Spindly	SPDL1	0.91249	0.83732	NaN	1.2342	NaN	1.2413	0.66894	NaN	NaN	NaN	Q96EA4	1	1	1	Protein Spindly	SPDL1	sp|Q96EA4|SPDLY_HUMAN Protein Spindly OS=Homo sapiens OX=9606 GN=SPDL1 PE=1 SV=2	1	1	1	1	0	1	1	0	0	0	0	1	1	1	0	1	1	0	0	0	0	1	1	1	0	1	1	0	0	0
P61009	Signal peptidase complex subunit 3	SPCS3	1.0568	1.0475	0.99472	0.96184	0.98977	1.0278	0.95452	0.94957	1.1608	1.0731	P61009	4	4	4	Signal peptidase complex subunit 3	SPCS3	sp|P61009|SPCS3_HUMAN Signal peptidase complex subunit 3 OS=Homo sapiens OX=9606 GN=SPCS3 PE=1 SV=1	1	4	4	4	3	4	3	4	2	2	3	4	4	4	3	4	3	4	2	2	3	4	4	4	3	4	3	4	2	2
Q15005	Signal peptidase complex subunit 2	SPCS2	1.0215	1.1005	0.99964	1.0507	0.98524	0.98277	1.281	1.1373	0.98591	0.96943	Q15005	12	12	12	Signal peptidase complex subunit 2	SPCS2	sp|Q15005|SPCS2_HUMAN Signal peptidase complex subunit 2 OS=Homo sapiens OX=9606 GN=SPCS2 PE=1 SV=3	1	12	12	12	9	8	9	9	6	4	8	7	8	6	9	8	9	9	6	4	8	7	8	6	9	8	9	9	6	4
Q9Y6A9	Signal peptidase complex subunit 1	SPCS1	0.91407	0.91224	0.94183	1.0181	1.0491	0.97969	1.096	1.0875	0.57455	0.78058	Q9Y6A9	4	4	4	Signal peptidase complex subunit 1	SPCS1	sp|Q9Y6A9|SPCS1_HUMAN Signal peptidase complex subunit 1 OS=Homo sapiens OX=9606 GN=SPCS1 PE=1 SV=4	1	4	4	4	3	3	3	3	3	3	3	3	3	3	3	3	3	3	3	3	3	3	3	3	3	3	3	3	3	3
Q9HBM1	Kinetochore protein Spc25	SPC25	1.1526	1.1305	NaN	NaN	NaN	NaN	NaN	NaN	1.4771	1.1575	Q9HBM1	4	4	4	Kinetochore protein Spc25	SPC25	sp|Q9HBM1|SPC25_HUMAN Kinetochore protein Spc25 OS=Homo sapiens OX=9606 GN=SPC25 PE=1 SV=1	1	4	4	4	0	0	0	0	2	1	0	0	2	1	0	0	0	0	2	1	0	0	2	1	0	0	0	0	2	1
Q8NBT2	Kinetochore protein Spc24	SPC24	1.0673	0.88169	1.0874	1.1782	0.82968	0.926	1.191	1.1229	0.99271	1.0581	Q8NBT2	6	5	5	Kinetochore protein Spc24	SPC24	sp|Q8NBT2|SPC24_HUMAN Kinetochore protein Spc24 OS=Homo sapiens OX=9606 GN=SPC24 PE=1 SV=2	1	6	5	5	3	2	2	3	3	4	2	3	2	1	2	2	2	2	3	4	2	2	2	1	2	2	2	2	3	4
Q9NUQ6	SPATS2-like protein	SPATS2L	1.0328	0.99482	0.90852	1.0112	0.99564	0.94947	1.1746	1.2532	0.99239	0.78565	Q9NUQ6	20	20	20	SPATS2-like protein	SPATS2L	sp|Q9NUQ6|SPS2L_HUMAN SPATS2-like protein OS=Homo sapiens OX=9606 GN=SPATS2L PE=1 SV=2	1	20	20	20	16	17	17	16	5	5	11	13	12	11	16	17	17	16	5	5	11	13	12	11	16	17	17	16	5	5
Q86XZ4	Spermatogenesis-associated serine-rich protein 2	SPATS2	1.0793	0.98844	1.078	1.0382	0.86729	0.93244	0.8787	0.8324	1.0386	1.065	Q86XZ4	20	20	20	Spermatogenesis-associated serine-rich protein 2	SPATS2	sp|Q86XZ4|SPAS2_HUMAN Spermatogenesis-associated serine-rich protein 2 OS=Homo sapiens OX=9606 GN=SPATS2 PE=1 SV=1	1	20	20	20	12	13	11	11	7	8	11	11	14	11	12	13	11	11	7	8	11	11	14	11	12	13	11	11	7	8
Q9BVQ7	Spermatogenesis-associated protein 5-like protein 1	SPATA5L1	0.9693	0.89712	0.96281	0.93654	1.0449	0.9946	1.0684	0.84675	0.91022	1.0288	Q9BVQ7	15	15	15	Spermatogenesis-associated protein 5-like protein 1	SPATA5L1	sp|Q9BVQ7|SPA5L_HUMAN Spermatogenesis-associated protein 5-like protein 1 OS=Homo sapiens OX=9606 GN=SPATA5L1 PE=1 SV=2	1	15	15	15	7	7	6	9	4	2	5	6	8	7	7	7	6	9	4	2	5	6	8	7	7	7	6	9	4	2
Q8NB90	Spermatogenesis-associated protein 5	SPATA5	0.97787	1.0344	1.0292	1.0797	1.0229	0.94567	0.92965	1.0183	0.87475	1.1509	Q8NB90	28	27	27	Spermatogenesis-associated protein 5	SPATA5	sp|Q8NB90|AFG2H_HUMAN ATPase family protein 2 homolog OS=Homo sapiens OX=9606 GN=SPATA5 PE=1 SV=3	1	28	27	27	15	12	14	12	10	12	17	16	15	13	14	11	13	11	9	11	16	15	14	12	14	11	13	11	9	11
Q9UBP0	Spastin	SPAST	1.1103	1.0219	0.84313	0.65559	1.0511	0.7109	0.71823	0.92089	NaN	NaN	Q9UBP0	3	3	3	Spastin	SPAST	sp|Q9UBP0|SPAST_HUMAN Spastin OS=Homo sapiens OX=9606 GN=SPAST PE=1 SV=1	1	3	3	3	1	2	2	1	0	0	2	2	3	3	1	2	2	1	0	0	2	2	3	3	1	2	2	1	0	0
O60271	C-Jun-amino-terminal kinase-interacting protein 4	SPAG9	0.9293	1.0138	0.99429	1.0036	0.97346	1.0217	0.9638	0.96509	0.70253	0.79261	O60271	33	33	29	C-Jun-amino-terminal kinase-interacting protein 4	SPAG9	sp|O60271|JIP4_HUMAN C-Jun-amino-terminal kinase-interacting protein 4 OS=Homo sapiens OX=9606 GN=SPAG9 PE=1 SV=4	1	33	33	29	13	16	16	15	13	10	16	19	20	20	13	16	16	15	13	10	16	19	20	20	12	14	14	14	12	9
O75391	Sperm-associated antigen 7	SPAG7	1.1213	0.96262	1.048	0.99767	0.97565	1.0408	0.92333	0.888	1.1887	1.3834	O75391	9	9	9	Sperm-associated antigen 7	SPAG7	sp|O75391|SPAG7_HUMAN Sperm-associated antigen 7 OS=Homo sapiens OX=9606 GN=SPAG7 PE=1 SV=2	1	9	9	9	6	6	5	5	3	3	6	6	5	6	6	6	5	5	3	3	6	6	5	6	6	6	5	5	3	3
Q96R06	Sperm-associated antigen 5	SPAG5	1.0044	NaN	NaN	NaN	NaN	NaN	0.5104	NaN	NaN	NaN	Q96R06	4	4	4	Sperm-associated antigen 5	SPAG5	sp|Q96R06|SPAG5_HUMAN Sperm-associated antigen 5 OS=Homo sapiens OX=9606 GN=SPAG5 PE=1 SV=2	1	4	4	4	1	0	2	0	1	1	0	0	1	0	1	0	2	0	1	1	0	0	1	0	1	0	2	0	1	1
Q07617	Sperm-associated antigen 1	SPAG1	NaN	NaN	1.1014	0.99859	NaN	NaN	1.3585	1.3641	NaN	NaN	Q07617	2	2	2	Sperm-associated antigen 1	SPAG1	sp|Q07617|SPAG1_HUMAN Sperm-associated antigen 1 OS=Homo sapiens OX=9606 GN=SPAG1 PE=1 SV=3	1	2	2	2	2	2	2	1	0	0	0	0	0	0	2	2	2	1	0	0	0	0	0	0	2	2	2	1	0	0
Q02447	Transcription factor Sp3	SP3	0.9108	0.95269	0.82951	2.6989	0.84786	0.62602	1.0537	0.64951	0.91676	0.88053	Q02447	3	3	3	Transcription factor Sp3	SP3	sp|Q02447|SP3_HUMAN Transcription factor Sp3 OS=Homo sapiens OX=9606 GN=SP3 PE=1 SV=3	1	3	3	3	2	1	2	2	2	2	1	1	2	2	2	1	2	2	2	2	1	1	2	2	2	1	2	2	2	2
P23497	Nuclear autoantigen Sp-100	SP100	0.97962	1.1047	1.1624	1.1064	0.92332	1.0373	0.83816	0.85	0.69761	NaN	P23497	10	6	3	Nuclear autoantigen Sp-100	SP100	sp|P23497|SP100_HUMAN Nuclear autoantigen Sp-100 OS=Homo sapiens OX=9606 GN=SP100 PE=1 SV=3	1	10	6	3	4	5	5	5	4	2	6	5	5	6	2	3	3	3	1	0	4	3	4	4	1	1	1	1	1	0
P08047	Transcription factor Sp1	SP1	1.1592	1.0986	1.2053	1.2191	0.99965	1.3221	1.1349	1.1385	1.1727	1.1427	P08047	6	6	6	Transcription factor Sp1	SP1	sp|P08047|SP1_HUMAN Transcription factor Sp1 OS=Homo sapiens OX=9606 GN=SP1 PE=1 SV=3	1	6	6	6	3	3	2	3	4	5	2	3	2	4	3	3	2	3	4	5	2	3	2	4	3	3	2	3	4	5
P48436;P57073;P56693	Transcription factor SOX-9	SOX9	0.89378	0.88606	1.0262	0.53005	0.82354	0.89116	1.4928	NaN	1.79	1.1304	P48436	5;1;1	5;1;1	5;1;1	Transcription factor SOX-9	SOX9	sp|P48436|SOX9_HUMAN Transcription factor SOX-9 OS=Homo sapiens OX=9606 GN=SOX9 PE=1 SV=1	3	5	5	5	1	2	2	1	2	1	2	1	1	1	1	2	2	1	2	1	2	1	1	1	1	2	2	1	2	1
Q06945	Transcription factor SOX-4	SOX4	NaN	0.85751	NaN	NaN	NaN	1.097	NaN	NaN	2.1349	2.9534	Q06945	1	1	1	Transcription factor SOX-4	SOX4	sp|Q06945|SOX4_HUMAN Transcription factor SOX-4 OS=Homo sapiens OX=9606 GN=SOX4 PE=1 SV=1	1	1	1	1	0	0	0	0	1	1	0	1	0	1	0	0	0	0	1	1	0	1	0	1	0	0	0	0	1	1
Q53LP3	Ankyrin repeat domain-containing protein SOWAHC	SOWAHC	0.98911	0.8147	NaN	0.86193	NaN	0.52561	NaN	0.93108	NaN	NaN	Q53LP3	6	6	6	Ankyrin repeat domain-containing protein SOWAHC	SOWAHC	sp|Q53LP3|SWAHC_HUMAN Ankyrin repeat domain-containing protein SOWAHC OS=Homo sapiens OX=9606 GN=SOWAHC PE=1 SV=1	1	6	6	6	0	1	1	2	1	1	0	2	1	1	0	1	1	2	1	1	0	2	1	1	0	1	1	2	1	1
Q00796	Sorbitol dehydrogenase	SORD	0.97559	1.0286	1.0099	1.0462	1.0277	1.0147	1.1595	1.1004	1.1619	1.1564	Q00796	22	22	22	Sorbitol dehydrogenase	SORD	sp|Q00796|DHSO_HUMAN Sorbitol dehydrogenase OS=Homo sapiens OX=9606 GN=SORD PE=1 SV=4	1	22	22	22	16	16	16	16	16	16	16	16	17	16	16	16	16	16	16	16	16	16	17	16	16	16	16	16	16	16
O60504	Vinexin	SORBS3	1.0281	0.92984	1.048	1.0673	1.005	0.99213	1.1867	1.2468	1.1137	1.2931	O60504	8	8	8	Vinexin	SORBS3	sp|O60504|VINEX_HUMAN Vinexin OS=Homo sapiens OX=9606 GN=SORBS3 PE=1 SV=2	1	8	8	8	4	5	3	3	4	5	5	4	4	3	4	5	3	3	4	5	5	4	4	3	4	5	3	3	4	5
P18583	Protein SON	SON	0.99262	0.90444	1.0118	1.0172	0.8814	0.88094	0.87415	0.85354	0.9595	0.97774	P18583	49	49	49	Protein SON	SON	sp|P18583|SON_HUMAN Protein SON OS=Homo sapiens OX=9606 GN=SON PE=1 SV=4	1	49	49	49	27	26	32	24	11	13	34	30	34	32	27	26	32	24	11	13	34	30	34	32	27	26	32	24	11	13
P04179	Superoxide dismutase [Mn], mitochondrial	SOD2	0.88261	0.92892	0.9822	1.0173	0.86487	0.69955	1.3221	1.1265	0.84536	0.88685	P04179	11	11	11	Superoxide dismutase [Mn], mitochondrial	SOD2	sp|P04179|SODM_HUMAN Superoxide dismutase [Mn], mitochondrial OS=Homo sapiens OX=9606 GN=SOD2 PE=1 SV=3	1	11	11	11	8	9	8	9	7	8	8	8	7	9	8	9	8	9	7	8	8	8	7	9	8	9	8	9	7	8
P00441	Superoxide dismutase [Cu-Zn]	SOD1	0.98132	0.93067	0.98496	0.90974	0.9095	0.93847	1.0459	0.99938	0.9342	0.91364	P00441	15	15	15	Superoxide dismutase [Cu-Zn]	SOD1	sp|P00441|SODC_HUMAN Superoxide dismutase [Cu-Zn] OS=Homo sapiens OX=9606 GN=SOD1 PE=1 SV=2	1	15	15	15	6	8	7	7	11	11	8	8	6	7	6	8	7	7	11	11	8	8	6	7	6	8	7	7	11	11
P35610	Sterol O-acyltransferase 1	SOAT1	0.86409	0.99386	0.86339	0.86823	0.98521	1.0238	1.0013	0.90948	0.91216	0.75021	P35610	7	7	7	Sterol O-acyltransferase 1	SOAT1	sp|P35610|SOAT1_HUMAN Sterol O-acyltransferase 1 OS=Homo sapiens OX=9606 GN=SOAT1 PE=1 SV=3	1	7	7	7	5	3	3	6	2	3	2	5	5	5	5	3	3	6	2	3	2	5	5	5	5	3	3	6	2	3
Q9Y5X1	Sorting nexin-9	SNX9	1.0229	0.98335	0.96115	1.0161	1.0208	1.0399	1.1026	1.0712	0.87783	0.91869	Q9Y5X1	16	16	16	Sorting nexin-9	SNX9	sp|Q9Y5X1|SNX9_HUMAN Sorting nexin-9 OS=Homo sapiens OX=9606 GN=SNX9 PE=1 SV=1	1	16	16	16	14	14	13	13	3	2	12	12	13	12	14	14	13	13	3	2	12	12	13	12	14	14	13	13	3	2
Q9Y5X2	Sorting nexin-8	SNX8	0.85356	0.84033	0.75889	1.0678	0.21066	1.0176	0.9826	0.85954	NaN	NaN	Q9Y5X2	8	8	8	Sorting nexin-8	SNX8	sp|Q9Y5X2|SNX8_HUMAN Sorting nexin-8 OS=Homo sapiens OX=9606 GN=SNX8 PE=1 SV=1	1	8	8	8	1	3	2	2	1	1	1	2	4	4	1	3	2	2	1	1	1	2	4	4	1	3	2	2	1	1
Q9UNH7	Sorting nexin-6;Sorting nexin-6, N-terminally processed	SNX6	1.01	1.1075	0.99581	1.0568	1.0462	1.0244	1.1473	1.1201	1.0177	1.0257	Q9UNH7	24	24	23	Sorting nexin-6;Sorting nexin-6, N-terminally processed	SNX6	sp|Q9UNH7|SNX6_HUMAN Sorting nexin-6 OS=Homo sapiens OX=9606 GN=SNX6 PE=1 SV=1	1	24	24	23	12	12	13	12	9	14	13	11	11	11	12	12	13	12	9	14	13	11	11	11	11	11	12	11	9	14
Q9Y5X3	Sorting nexin-5	SNX5	1.2437	1.3679	1.1802	1.0128	1.238	1.1531	1.2885	1.2474	1.2033	1.1462	Q9Y5X3	22	20	20	Sorting nexin-5	SNX5	sp|Q9Y5X3|SNX5_HUMAN Sorting nexin-5 OS=Homo sapiens OX=9606 GN=SNX5 PE=1 SV=1	1	22	20	20	14	16	11	15	8	7	11	12	11	11	12	14	9	13	8	7	9	11	9	10	12	14	9	13	8	7
O95219	Sorting nexin-4	SNX4	0.62725	0.96476	1.0464	1.0907	1.0367	1.1248	1.3338	1.159	0.93474	NaN	O95219	7	7	7	Sorting nexin-4	SNX4	sp|O95219|SNX4_HUMAN Sorting nexin-4 OS=Homo sapiens OX=9606 GN=SNX4 PE=1 SV=1	1	7	7	7	2	3	1	3	1	0	2	3	2	1	2	3	1	3	1	0	2	3	2	1	2	3	1	3	1	0
Q5VWJ9	Sorting nexin-30	SNX30	NaN	NaN	NaN	NaN	0.91595	NaN	NaN	NaN	NaN	NaN	Q5VWJ9	2	2	2	Sorting nexin-30	SNX30	sp|Q5VWJ9|SNX30_HUMAN Sorting nexin-30 OS=Homo sapiens OX=9606 GN=SNX30 PE=1 SV=1	1	2	2	2	0	0	0	0	1	0	1	0	0	0	0	0	0	0	1	0	1	0	0	0	0	0	0	0	1	0
O60493	Sorting nexin-3	SNX3	0.98667	1.0279	0.98833	0.96765	0.92868	0.95468	1.0517	1.1337	0.82418	0.81758	O60493	13	13	11	Sorting nexin-3	SNX3	sp|O60493|SNX3_HUMAN Sorting nexin-3 OS=Homo sapiens OX=9606 GN=SNX3 PE=1 SV=3	1	13	13	11	11	11	9	10	9	8	10	9	11	11	11	11	9	10	9	8	10	9	11	11	9	9	7	8	9	7
Q96L92	Sorting nexin-27	SNX27	1.2308	1.2549	1.1388	1.5119	1.6707	NaN	1.2174	1.0579	1.0293	0.99645	Q96L92	11	11	11	Sorting nexin-27	SNX27	sp|Q96L92|SNX27_HUMAN Sorting nexin-27 OS=Homo sapiens OX=9606 GN=SNX27 PE=1 SV=2	1	11	11	11	4	4	1	2	6	9	3	2	4	4	4	4	1	2	6	9	3	2	4	4	4	4	1	2	6	9
O60749	Sorting nexin-2	SNX2	1.0327	1.0932	1.0873	1.0508	1.1081	1.0194	1.1378	1.0459	0.94044	0.98133	O60749	22	20	20	Sorting nexin-2	SNX2	sp|O60749|SNX2_HUMAN Sorting nexin-2 OS=Homo sapiens OX=9606 GN=SNX2 PE=1 SV=2	1	22	20	20	14	15	13	15	16	14	12	14	16	14	12	13	11	13	14	13	10	12	14	12	12	13	11	13	14	13
Q96RF0	Sorting nexin-18	SNX18	NaN	0.88149	1.0764	0.99689	NaN	0.69709	NaN	NaN	NaN	NaN	Q96RF0	3	3	3	Sorting nexin-18	SNX18	sp|Q96RF0|SNX18_HUMAN Sorting nexin-18 OS=Homo sapiens OX=9606 GN=SNX18 PE=1 SV=2	1	3	3	3	1	2	0	0	1	1	0	1	0	1	1	2	0	0	1	1	0	1	0	1	1	2	0	0	1	1
Q15036	Sorting nexin-17	SNX17	0.86371	0.99314	0.90519	0.95269	0.88799	0.9663	0.89043	0.8612	NaN	NaN	Q15036	3	3	3	Sorting nexin-17	SNX17	sp|Q15036|SNX17_HUMAN Sorting nexin-17 OS=Homo sapiens OX=9606 GN=SNX17 PE=1 SV=1	1	3	3	3	2	2	3	2	0	0	2	3	2	2	2	2	3	2	0	0	2	3	2	2	2	2	3	2	0	0
P57768	Sorting nexin-16	SNX16	NaN	NaN	1.2506	1.0011	NaN	NaN	1.8479	1.8425	NaN	NaN	P57768	1	1	1	Sorting nexin-16	SNX16	sp|P57768|SNX16_HUMAN Sorting nexin-16 OS=Homo sapiens OX=9606 GN=SNX16 PE=1 SV=2	1	1	1	1	1	1	1	1	0	0	0	0	0	0	1	1	1	1	0	0	0	0	0	0	1	1	1	1	0	0
Q9UMY4	Sorting nexin-12	SNX12	1.1169	1.0158	1.055	1.0418	1.01	0.96575	1.022	1.0632	0.71251	0.8474	Q9UMY4	9	7	7	Sorting nexin-12	SNX12	sp|Q9UMY4|SNX12_HUMAN Sorting nexin-12 OS=Homo sapiens OX=9606 GN=SNX12 PE=1 SV=3	1	9	7	7	5	6	6	4	4	4	5	4	5	5	3	4	4	2	4	3	3	2	3	3	3	4	4	2	4	3
Q13596	Sorting nexin-1	SNX1	1.0398	0.98126	0.97257	0.96441	1.0283	1.1046	1.3908	1.3097	1.211	1.2253	Q13596	25	25	23	Sorting nexin-1	SNX1	sp|Q13596|SNX1_HUMAN Sorting nexin-1 OS=Homo sapiens OX=9606 GN=SNX1 PE=1 SV=3	1	25	25	23	15	15	13	17	12	9	14	18	13	15	15	15	13	17	12	9	14	18	13	15	13	13	11	15	10	8
Q13573	SNW domain-containing protein 1	SNW1	0.98489	0.91272	0.92236	0.98647	0.8885	0.92399	0.94951	0.98313	1.13	0.98698	Q13573	26	26	26	SNW domain-containing protein 1	SNW1	sp|Q13573|SNW1_HUMAN SNW domain-containing protein 1 OS=Homo sapiens OX=9606 GN=SNW1 PE=1 SV=1	1	26	26	26	14	15	15	16	12	13	14	15	17	15	14	15	15	16	12	13	14	15	17	15	14	15	15	16	12	13
Q13425	Beta-2-syntrophin	SNTB2	0.73224	0.97417	0.78135	1.1453	0.69708	0.74955	0.75616	0.86796	0.48136	0.86362	Q13425	9	9	9	Beta-2-syntrophin	SNTB2	sp|Q13425|SNTB2_HUMAN Beta-2-syntrophin OS=Homo sapiens OX=9606 GN=SNTB2 PE=1 SV=1	1	9	9	9	2	3	4	3	4	4	3	3	3	6	2	3	4	3	4	4	3	3	3	6	2	3	4	3	4	4
P63162;P14678	Small nuclear ribonucleoprotein-associated protein N;Small nuclear ribonucleoprotein-associated proteins B and B	SNRPN;SNRPB	1.0168	1.1569	1.0002	1.0942	1.1259	1.0608	0.94264	0.94522	1.0776	1.0638	P63162;P14678	11;11	11;11	11;11	Small nuclear ribonucleoprotein-associated protein N;Small nuclear ribonucleoprotein-associated proteins B and B	SNRPN;SNRPB	sp|P63162|RSMN_HUMAN Small nuclear ribonucleoprotein-associated protein N OS=Homo sapiens OX=9606 GN=SNRPN PE=1 SV=1;sp|P14678|RSMB_HUMAN Small nuclear ribonucleoprotein-associated proteins B and B OS=Homo sapiens OX=9606 GN=SNRPB PE=1 SV=2	2	11	11	11	6	8	7	6	9	9	6	7	7	7	6	8	7	6	9	9	6	7	7	7	6	8	7	6	9	9
P62308;A8MWD9	Small nuclear ribonucleoprotein G;Putative small nuclear ribonucleoprotein G-like protein 15	SNRPG;SNRPGP15	1.0447	1.0695	1.0328	1.0949	0.99403	1.0135	0.88786	0.90425	1.0651	1.1366	P62308;A8MWD9	4;4	4;4	4;4	Small nuclear ribonucleoprotein G;Putative small nuclear ribonucleoprotein G-like protein 15	SNRPG;SNRPGP15	sp|P62308|RUXG_HUMAN Small nuclear ribonucleoprotein G OS=Homo sapiens OX=9606 GN=SNRPG PE=1 SV=1;sp|A8MWD9|RUXGL_HUMAN Putative small nuclear ribonucleoprotein G-like protein 15 OS=Homo sapiens OX=9606 GN=SNRPGP15 PE=5 SV=2	2	4	4	4	3	4	4	4	2	2	4	4	3	4	3	4	4	4	2	2	4	4	3	4	3	4	4	4	2	2
P62306	Small nuclear ribonucleoprotein F	SNRPF	1.0583	1.1495	1.0864	1.0775	0.97306	1.0922	0.85758	0.84544	1.1104	1.0852	P62306	8	8	8	Small nuclear ribonucleoprotein F	SNRPF	sp|P62306|RUXF_HUMAN Small nuclear ribonucleoprotein F OS=Homo sapiens OX=9606 GN=SNRPF PE=1 SV=1	1	8	8	8	6	5	4	5	5	5	5	6	7	6	6	5	4	5	5	5	5	6	7	6	6	5	4	5	5	5
P62304	Small nuclear ribonucleoprotein E	SNRPE	1.0261	1.018	1.0222	1.0141	0.95025	1.0077	0.95962	0.93351	1.1295	1.0823	P62304	4	4	4	Small nuclear ribonucleoprotein E	SNRPE	sp|P62304|RUXE_HUMAN Small nuclear ribonucleoprotein E OS=Homo sapiens OX=9606 GN=SNRPE PE=1 SV=1	1	4	4	4	2	2	2	2	4	4	2	2	2	2	2	2	2	2	4	4	2	2	2	2	2	2	2	2	4	4
P62318	Small nuclear ribonucleoprotein Sm D3	SNRPD3	1.0211	1.025	0.94703	1.0252	1.0501	1.0983	0.85128	0.86876	1.1041	1.0878	P62318	7	7	7	Small nuclear ribonucleoprotein Sm D3	SNRPD3	sp|P62318|SMD3_HUMAN Small nuclear ribonucleoprotein Sm D3 OS=Homo sapiens OX=9606 GN=SNRPD3 PE=1 SV=1	1	7	7	7	5	5	4	4	5	6	4	5	5	5	5	5	4	4	5	6	4	5	5	5	5	5	4	4	5	6
P62316	Small nuclear ribonucleoprotein Sm D2	SNRPD2	0.9422	1.0784	1.0107	1.0399	1.019	1.0772	0.8984	0.90246	1.1297	1.1627	P62316	15	15	15	Small nuclear ribonucleoprotein Sm D2	SNRPD2	sp|P62316|SMD2_HUMAN Small nuclear ribonucleoprotein Sm D2 OS=Homo sapiens OX=9606 GN=SNRPD2 PE=1 SV=1	1	15	15	15	7	8	8	7	12	12	7	6	7	7	7	8	8	7	12	12	7	6	7	7	7	8	8	7	12	12
P62314	Small nuclear ribonucleoprotein Sm D1	SNRPD1	1.0404	1.144	1.0687	1.1324	1.0994	1.0925	0.83822	0.84532	1.1217	1.2713	P62314	5	5	5	Small nuclear ribonucleoprotein Sm D1	SNRPD1	sp|P62314|SMD1_HUMAN Small nuclear ribonucleoprotein Sm D1 OS=Homo sapiens OX=9606 GN=SNRPD1 PE=1 SV=1	1	5	5	5	5	5	4	5	5	4	5	5	5	5	5	5	4	5	5	4	5	5	5	5	5	5	4	5	5	4
P09234	U1 small nuclear ribonucleoprotein C	SNRPC	0.98972	0.95271	0.98415	0.94438	1.0116	0.93533	1.0207	1.0119	NaN	NaN	P09234	2	2	2	U1 small nuclear ribonucleoprotein C	SNRPC	sp|P09234|RU1C_HUMAN U1 small nuclear ribonucleoprotein C OS=Homo sapiens OX=9606 GN=SNRPC PE=1 SV=1	1	2	2	2	2	2	2	2	0	0	2	2	2	2	2	2	2	2	0	0	2	2	2	2	2	2	2	2	0	0
P08579	U2 small nuclear ribonucleoprotein B	SNRPB2	0.96479	1.0833	0.96035	1.0569	1.1439	1.0476	1.5847	1.2889	1.0644	1.0754	P08579	13	13	11	U2 small nuclear ribonucleoprotein B	SNRPB2	sp|P08579|RU2B_HUMAN U2 small nuclear ribonucleoprotein B OS=Homo sapiens OX=9606 GN=SNRPB2 PE=1 SV=1	1	13	13	11	7	7	6	6	7	8	8	7	7	7	7	7	6	6	7	8	8	7	7	7	5	5	4	4	6	6
P09661	U2 small nuclear ribonucleoprotein A	SNRPA1	1.0139	0.98593	0.96526	0.98114	0.99154	0.97516	1.098	1.0704	1.091	1.1119	P09661	20	20	20	U2 small nuclear ribonucleoprotein A	SNRPA1	sp|P09661|RU2A_HUMAN U2 small nuclear ribonucleoprotein A OS=Homo sapiens OX=9606 GN=SNRPA1 PE=1 SV=2	1	20	20	20	9	8	9	8	11	14	11	11	11	12	9	8	9	8	11	14	11	11	11	12	9	8	9	8	11	14
P09012	U1 small nuclear ribonucleoprotein A	SNRPA	0.95089	0.94996	0.95417	0.96346	0.92839	0.91309	0.93152	0.91109	1.0309	1.0198	P09012	12	10	10	U1 small nuclear ribonucleoprotein A	SNRPA	sp|P09012|SNRPA_HUMAN U1 small nuclear ribonucleoprotein A OS=Homo sapiens OX=9606 GN=SNRPA PE=1 SV=3	1	12	10	10	10	11	9	8	7	9	10	10	10	9	8	9	7	6	6	7	8	9	9	8	8	9	7	6	6	7
P08621	U1 small nuclear ribonucleoprotein 70 kDa	SNRNP70	1.0086	0.97191	0.96395	0.97869	0.95745	0.95098	0.90451	0.94829	0.99348	0.97733	P08621	29	29	29	U1 small nuclear ribonucleoprotein 70 kDa	SNRNP70	sp|P08621|RU17_HUMAN U1 small nuclear ribonucleoprotein 70 kDa OS=Homo sapiens OX=9606 GN=SNRNP70 PE=1 SV=2	1	29	29	29	16	16	16	14	20	18	16	16	16	18	16	16	16	14	20	18	16	16	16	18	16	16	16	14	20	18
Q96DI7	U5 small nuclear ribonucleoprotein 40 kDa protein	SNRNP40	1.0077	1.0008	0.99686	1.0113	0.96449	0.98386	0.95728	0.92584	1.0809	1.0588	Q96DI7	22	22	22	U5 small nuclear ribonucleoprotein 40 kDa protein	SNRNP40	sp|Q96DI7|SNR40_HUMAN U5 small nuclear ribonucleoprotein 40 kDa protein OS=Homo sapiens OX=9606 GN=SNRNP40 PE=1 SV=1	1	22	22	22	15	13	15	14	14	15	13	13	15	14	15	13	15	14	14	15	13	13	15	14	15	13	15	14	14	15
Q8WVK2	U4/U6.U5 small nuclear ribonucleoprotein 27 kDa protein	SNRNP27	1.1764	0.99415	1.1443	0.8031	0.89758	0.81588	0.90753	0.99791	NaN	0.79041	Q8WVK2	3	3	3	U4/U6.U5 small nuclear ribonucleoprotein 27 kDa protein	SNRNP27	sp|Q8WVK2|SNR27_HUMAN U4/U6.U5 small nuclear ribonucleoprotein 27 kDa protein OS=Homo sapiens OX=9606 GN=SNRNP27 PE=1 SV=1	1	3	3	3	1	2	2	2	1	1	1	2	1	2	1	2	2	2	1	1	1	2	1	2	1	2	2	2	1	1
O75643	U5 small nuclear ribonucleoprotein 200 kDa helicase	SNRNP200	0.99778	1.0197	1.0058	1.0091	1.0008	1.0055	0.93476	0.91475	1.1325	1.1344	O75643	126	126	125	U5 small nuclear ribonucleoprotein 200 kDa helicase	SNRNP200	sp|O75643|U520_HUMAN U5 small nuclear ribonucleoprotein 200 kDa helicase OS=Homo sapiens OX=9606 GN=SNRNP200 PE=1 SV=2	1	126	126	125	86	86	82	78	69	68	87	87	83	87	86	86	82	78	69	68	87	87	83	87	86	86	82	78	69	68
Q8TAD8	Smad nuclear-interacting protein 1	SNIP1	0.97051	1.297	1.0874	3.7417	1.2043	1.3455	1.0082	1.1022	NaN	NaN	Q8TAD8	3	3	3	Smad nuclear-interacting protein 1	SNIP1	sp|Q8TAD8|SNIP1_HUMAN Smad nuclear-interacting protein 1 OS=Homo sapiens OX=9606 GN=SNIP1 PE=1 SV=1	1	3	3	3	3	1	3	3	0	0	1	1	2	3	3	1	3	3	0	0	1	1	2	3	3	1	3	3	0	0
Q96H20	Vacuolar-sorting protein SNF8	SNF8	1.1377	1.1449	0.86603	1.0328	0.91746	0.90108	1.1463	1.2726	0.98711	0.99651	Q96H20	4	4	4	Vacuolar-sorting protein SNF8	SNF8	sp|Q96H20|SNF8_HUMAN Vacuolar-sorting protein SNF8 OS=Homo sapiens OX=9606 GN=SNF8 PE=1 SV=1	1	4	4	4	3	2	2	2	2	2	2	2	3	2	3	2	2	2	2	2	2	2	3	2	3	2	2	2	2	2
Q7KZF4	Staphylococcal nuclease domain-containing protein 1	SND1	1.0382	1.0249	1.005	0.99907	1.019	1.0269	1.0379	1.0609	1.0549	1.0408	Q7KZF4	62	62	62	Staphylococcal nuclease domain-containing protein 1	SND1	sp|Q7KZF4|SND1_HUMAN Staphylococcal nuclease domain-containing protein 1 OS=Homo sapiens OX=9606 GN=SND1 PE=1 SV=1	1	62	62	62	38	33	37	36	35	41	36	38	35	36	38	33	37	36	35	41	36	38	35	36	38	33	37	36	35	41
O76070	Gamma-synuclein	SNCG	1.0813	NaN	0.96687	1.3668	0.79893	0.73508	3.212	3.0792	1.1194	1.6556	O76070	6	6	6	Gamma-synuclein	SNCG	sp|O76070|SYUG_HUMAN Gamma-synuclein OS=Homo sapiens OX=9606 GN=SNCG PE=1 SV=2	1	6	6	6	3	3	3	2	3	3	2	2	1	1	3	3	3	2	3	3	2	2	1	1	3	3	3	2	3	3
O95295	SNARE-associated protein Snapin	SNAPIN	1.116	1.0353	0.8545	1.1757	1.0434	1.0886	1.2569	1.0984	1.2169	1.1657	O95295	7	7	7	SNARE-associated protein Snapin	SNAPIN	sp|O95295|SNAPN_HUMAN SNARE-associated protein Snapin OS=Homo sapiens OX=9606 GN=SNAPIN PE=1 SV=1	1	7	7	7	3	2	4	2	4	4	2	3	4	4	3	2	4	2	4	4	2	3	4	4	3	2	4	2	4	4
Q5SQN1	Synaptosomal-associated protein 47	SNAP47	0.92084	0.95683	0.8624	0.68488	NaN	0.13197	NaN	NaN	NaN	NaN	Q5SQN1	3	3	3	Synaptosomal-associated protein 47	SNAP47	sp|Q5SQN1|SNP47_HUMAN Synaptosomal-associated protein 47 OS=Homo sapiens OX=9606 GN=SNAP47 PE=1 SV=3	1	3	3	3	2	1	0	0	0	0	0	1	1	1	2	1	0	0	0	0	0	1	1	1	2	1	0	0	0	0
O95721	Synaptosomal-associated protein 29	SNAP29	0.95835	0.89892	1.259	1.1158	0.92389	1.0322	1.6393	1.6283	1.3177	1.0647	O95721	7	7	7	Synaptosomal-associated protein 29	SNAP29	sp|O95721|SNP29_HUMAN Synaptosomal-associated protein 29 OS=Homo sapiens OX=9606 GN=SNAP29 PE=1 SV=1	1	7	7	7	4	5	4	3	3	2	2	4	4	3	4	5	4	3	3	2	2	4	4	3	4	5	4	3	3	2
O00161	Synaptosomal-associated protein 23	SNAP23	0.97915	0.97909	1.1222	0.95018	0.92555	0.69242	1.106	1.0324	0.84594	0.83211	O00161	9	9	9	Synaptosomal-associated protein 23	SNAP23	sp|O00161|SNP23_HUMAN Synaptosomal-associated protein 23 OS=Homo sapiens OX=9606 GN=SNAP23 PE=1 SV=1	1	9	9	9	4	5	4	5	4	3	4	3	7	6	4	5	4	5	4	3	4	3	7	6	4	5	4	5	4	3
Q6GMV2	SET and MYND domain-containing protein 5	SMYD5	0.9289	0.99441	0.99637	0.94259	1.0144	0.96402	0.98467	0.96531	1.5029	1.1452	Q6GMV2	9	9	9	SET and MYND domain-containing protein 5	SMYD5	sp|Q6GMV2|SMYD5_HUMAN SET and MYND domain-containing protein 5 OS=Homo sapiens OX=9606 GN=SMYD5 PE=1 SV=2	1	9	9	9	6	8	6	7	3	3	7	6	3	6	6	8	6	7	3	3	7	6	3	6	6	8	6	7	3	3
Q9H7B4	Histone-lysine N-methyltransferase SMYD3	SMYD3	NaN	NaN	0.74104	1.0055	1.079	0.44956	1.058	0.75579	0.8355	NaN	Q9H7B4	5	5	5	Histone-lysine N-methyltransferase SMYD3	SMYD3	sp|Q9H7B4|SMYD3_HUMAN Histone-lysine N-methyltransferase SMYD3 OS=Homo sapiens OX=9606 GN=SMYD3 PE=1 SV=4	1	5	5	5	1	1	1	1	3	1	1	1	0	0	1	1	1	1	3	1	1	1	0	0	1	1	1	1	3	1
Q9NRG4	N-lysine methyltransferase SMYD2	SMYD2	NaN	0.90906	0.85593	1.2178	0.92365	1.0367	NaN	0.76465	NaN	NaN	Q9NRG4	3	3	3	N-lysine methyltransferase SMYD2	SMYD2	sp|Q9NRG4|SMYD2_HUMAN N-lysine methyltransferase SMYD2 OS=Homo sapiens OX=9606 GN=SMYD2 PE=1 SV=2	1	3	3	3	1	1	1	2	0	0	2	1	0	1	1	1	1	2	0	0	2	1	0	1	1	1	1	2	0	0
Q9HAU4;Q9HCE7	E3 ubiquitin-protein ligase SMURF2	SMURF2	1.2603	0.87987	1.0586	1.2064	1.0765	1.0422	1.8491	1.7789	2.1148	1.4888	Q9HAU4	15;1	15;1	15;1	E3 ubiquitin-protein ligase SMURF2	SMURF2	sp|Q9HAU4|SMUF2_HUMAN E3 ubiquitin-protein ligase SMURF2 OS=Homo sapiens OX=9606 GN=SMURF2 PE=1 SV=1	2	15	15	15	10	10	8	9	6	2	10	10	6	7	10	10	8	9	6	2	10	10	6	7	10	10	8	9	6	2
Q2TAY7	WD40 repeat-containing protein SMU1;WD40 repeat-containing protein SMU1, N-terminally processed	SMU1	1.0423	1.0282	1.0213	1.0424	1.0468	0.94699	0.94041	0.88964	1.2633	1.2178	Q2TAY7	21	21	21	WD40 repeat-containing protein SMU1;WD40 repeat-containing protein SMU1, N-terminally processed	SMU1	sp|Q2TAY7|SMU1_HUMAN WD40 repeat-containing protein SMU1 OS=Homo sapiens OX=9606 GN=SMU1 PE=1 SV=2	1	21	21	21	16	16	15	14	12	13	15	15	16	15	16	16	15	14	12	13	15	15	16	15	16	16	15	14	12	13
P53814	Smoothelin	SMTN	1.0457	1.0735	0.79781	1.0511	0.99605	0.82707	2.4595	2.7007	NaN	NaN	P53814	10	10	10	Smoothelin	SMTN	sp|P53814|SMTN_HUMAN Smoothelin OS=Homo sapiens OX=9606 GN=SMTN PE=1 SV=7	1	10	10	10	6	9	6	5	3	1	7	8	3	3	6	9	6	5	3	1	7	8	3	3	6	9	6	5	3	1
P52788	Spermine synthase	SMS	1.0367	1.0282	1.0161	1.0284	1.0216	1.0852	1.2209	1.2727	1.2472	1.2029	P52788	21	21	21	Spermine synthase	SMS	sp|P52788|SPSY_HUMAN Spermine synthase OS=Homo sapiens OX=9606 GN=SMS PE=1 SV=2	1	21	21	21	15	14	14	14	9	11	15	14	14	14	15	14	14	14	9	11	15	14	14	14	15	14	14	14	9	11
Q92485	Acid sphingomyelinase-like phosphodiesterase 3b	SMPDL3B	0.96043	0.9067	1.11	0.97143	1.0233	1.0381	1.4245	1.4372	0.41487	0.5712	Q92485	7	7	7	Acid sphingomyelinase-like phosphodiesterase 3b	SMPDL3B	sp|Q92485|ASM3B_HUMAN Acid sphingomyelinase-like phosphodiesterase 3b OS=Homo sapiens OX=9606 GN=SMPDL3B PE=1 SV=2	1	7	7	7	4	4	4	4	5	4	3	2	5	4	4	4	4	4	5	4	3	2	5	4	4	4	4	4	5	4
Q9NXE4	Sphingomyelin phosphodiesterase 4	SMPD4	1.0029	0.95744	0.99483	1.0156	0.92707	0.88441	0.82765	0.83391	1.2081	1.0983	Q9NXE4	15	15	15	Sphingomyelin phosphodiesterase 4	SMPD4	sp|Q9NXE4|NSMA3_HUMAN Sphingomyelin phosphodiesterase 4 OS=Homo sapiens OX=9606 GN=SMPD4 PE=1 SV=3	1	15	15	15	11	7	9	11	4	5	7	7	9	7	11	7	9	11	4	5	7	7	9	7	11	7	9	11	4	5
O60906	Sphingomyelin phosphodiesterase 2	SMPD2	0.90019	0.96138	1.1522	1.3968	0.98599	1.187	0.76997	0.84283	NaN	NaN	O60906	1	1	1	Sphingomyelin phosphodiesterase 2	SMPD2	sp|O60906|NSMA_HUMAN Sphingomyelin phosphodiesterase 2 OS=Homo sapiens OX=9606 GN=SMPD2 PE=1 SV=2	1	1	1	1	1	1	1	1	0	0	1	1	1	1	1	1	1	1	0	0	1	1	1	1	1	1	1	1	0	0
O75940	Survival of motor neuron-related-splicing factor 30	SMNDC1	0.96098	0.97279	1.0182	0.95817	0.92781	0.99861	0.90587	0.90987	1.1575	1.2427	O75940	9	9	9	Survival of motor neuron-related-splicing factor 30	SMNDC1	sp|O75940|SPF30_HUMAN Survival of motor neuron-related-splicing factor 30 OS=Homo sapiens OX=9606 GN=SMNDC1 PE=1 SV=1	1	9	9	9	6	7	6	5	5	4	6	6	7	7	6	7	6	5	5	4	6	6	7	7	6	7	6	5	5	4
Q16637	Survival motor neuron protein	SMN1	0.96867	1.0054	0.97625	0.96356	0.96205	0.86003	0.91804	0.89603	0.98697	1.0598	Q16637	10	10	10	Survival motor neuron protein	SMN1	sp|Q16637|SMN_HUMAN Survival motor neuron protein OS=Homo sapiens OX=9606 GN=SMN1 PE=1 SV=1	1	10	10	10	6	5	5	5	9	7	6	6	6	5	6	5	5	5	9	7	6	6	6	5	6	5	5	5	9	7
Q8N5G0	Small integral membrane protein 20	SMIM20	0.97094	1.0833	0.93496	1.0551	0.92036	0.87669	1.771	1.4919	1.1749	1.1504	Q8N5G0	2	2	2	Small integral membrane protein 20	SMIM20	sp|Q8N5G0|SIM20_HUMAN Small integral membrane protein 20 OS=Homo sapiens OX=9606 GN=SMIM20 PE=1 SV=3	1	2	2	2	2	2	2	2	1	1	2	2	2	2	2	2	2	2	1	1	2	2	2	2	2	2	2	2	1	1
Q96EX1	Small integral membrane protein 12	SMIM12	NaN	NaN	NaN	NaN	NaN	1.03	NaN	NaN	NaN	NaN	Q96EX1	1	1	1	Small integral membrane protein 12	SMIM12	sp|Q96EX1|SIM12_HUMAN Small integral membrane protein 12 OS=Homo sapiens OX=9606 GN=SMIM12 PE=1 SV=3	1	1	1	1	0	0	0	1	0	0	0	1	0	0	0	0	0	1	0	0	0	1	0	0	0	0	0	1	0	0
Q9H0W8	Protein SMG9	SMG9	0.95318	0.92508	0.90734	0.91084	0.91138	0.98275	0.8158	0.83114	1.2994	1.07	Q9H0W8	11	11	11	Protein SMG9	SMG9	sp|Q9H0W8|SMG9_HUMAN Protein SMG9 OS=Homo sapiens OX=9606 GN=SMG9 PE=1 SV=1	1	11	11	11	7	7	8	8	4	3	7	7	8	7	7	7	8	8	4	3	7	7	8	7	7	7	8	8	4	3
Q8ND04	Protein SMG8	SMG8	0.82856	1.0327	0.71807	0.91257	0.99871	1.007	0.76508	0.82529	NaN	NaN	Q8ND04	9	9	9	Protein SMG8	SMG8	sp|Q8ND04|SMG8_HUMAN Protein SMG8 OS=Homo sapiens OX=9606 GN=SMG8 PE=1 SV=1	1	9	9	9	3	4	3	5	2	1	4	5	5	6	3	4	3	5	2	1	4	5	5	6	3	4	3	5	2	1
Q96Q15	Serine/threonine-protein kinase SMG1	SMG1	1.1983	1.1143	1.2458	NaN	0.88742	NaN	0.81437	NaN	NaN	NaN	Q96Q15	7	6	6	Serine/threonine-protein kinase SMG1	SMG1	sp|Q96Q15|SMG1_HUMAN Serine/threonine-protein kinase SMG1 OS=Homo sapiens OX=9606 GN=SMG1 PE=1 SV=3	1	7	6	6	1	0	2	2	2	2	2	1	2	3	1	0	1	1	2	2	1	0	2	2	1	0	1	1	2	2
Q5MIZ7	Serine/threonine-protein phosphatase 4 regulatory subunit 3B	SMEK2	1.0052	0.47095	0.88218	0.43144	0.6939	0.94479	0.81694	NaN	NaN	NaN	Q5MIZ7	10	6	6	Serine/threonine-protein phosphatase 4 regulatory subunit 3B	SMEK2	sp|Q5MIZ7|P4R3B_HUMAN Serine/threonine-protein phosphatase 4 regulatory subunit 3B OS=Homo sapiens OX=9606 GN=PPP4R3B PE=1 SV=2	1	10	6	6	2	3	3	2	2	0	4	2	4	5	1	1	2	1	2	0	2	1	2	3	1	1	2	1	2	0
Q6IN85	Serine/threonine-protein phosphatase 4 regulatory subunit 3A	SMEK1	0.91261	1.1659	0.92647	1.003	0.87966	0.85627	0.98295	0.89227	1.2035	1.1766	Q6IN85	16	16	12	Serine/threonine-protein phosphatase 4 regulatory subunit 3A	SMEK1	sp|Q6IN85|P4R3A_HUMAN Serine/threonine-protein phosphatase 4 regulatory subunit 3A OS=Homo sapiens OX=9606 GN=PPP4R3A PE=1 SV=1	1	16	16	12	7	8	5	6	6	4	7	6	8	7	7	8	5	6	6	4	7	6	8	7	6	6	4	5	6	4
Q9H4I9	Essential MCU regulator, mitochondrial	SMDT1	NaN	NaN	NaN	NaN	NaN	NaN	NaN	NaN	NaN	NaN	Q9H4I9	1	1	1	Essential MCU regulator, mitochondrial	SMDT1	sp|Q9H4I9|EMRE_HUMAN Essential MCU regulator, mitochondrial OS=Homo sapiens OX=9606 GN=SMDT1 PE=1 SV=1	1	1	1	1	1	1	1	1	0	0	1	1	1	1	1	1	1	1	0	0	1	1	1	1	1	1	1	1	0	0
A6NHR9	Structural maintenance of chromosomes flexible hinge domain-containing protein 1	SMCHD1	1.0175	1.079	0.99292	1.046	0.97887	1.0032	0.98736	0.96034	0.85154	0.82837	A6NHR9	55	55	55	Structural maintenance of chromosomes flexible hinge domain-containing protein 1	SMCHD1	sp|A6NHR9|SMHD1_HUMAN Structural maintenance of chromosomes flexible hinge domain-containing protein 1 OS=Homo sapiens OX=9606 GN=SMCHD1 PE=1 SV=2	1	55	55	55	25	26	27	26	17	16	23	27	26	29	25	26	27	26	17	16	23	27	26	29	25	26	27	26	17	16
Q96SB8	Structural maintenance of chromosomes protein 6	SMC6	0.89841	0.92583	1.1521	0.99076	1.0738	1.1927	1.2229	NaN	NaN	1.4059	Q96SB8	8	8	8	Structural maintenance of chromosomes protein 6	SMC6	sp|Q96SB8|SMC6_HUMAN Structural maintenance of chromosomes protein 6 OS=Homo sapiens OX=9606 GN=SMC6 PE=1 SV=2	1	8	8	8	1	2	1	1	0	2	1	3	4	2	1	2	1	1	0	2	1	3	4	2	1	2	1	1	0	2
Q8IY18	Structural maintenance of chromosomes protein 5	SMC5	NaN	0.99463	NaN	NaN	0.9705	0.88758	0.88253	1.0291	NaN	2.2097	Q8IY18	4	4	4	Structural maintenance of chromosomes protein 5	SMC5	sp|Q8IY18|SMC5_HUMAN Structural maintenance of chromosomes protein 5 OS=Homo sapiens OX=9606 GN=SMC5 PE=1 SV=2	1	4	4	4	0	0	2	1	0	1	2	1	0	1	0	0	2	1	0	1	2	1	0	1	0	0	2	1	0	1
Q9NTJ3	Structural maintenance of chromosomes protein 4	SMC4	0.94414	0.92476	0.91684	0.95821	0.95412	0.82523	0.98998	1.0188	1.2562	1.2766	Q9NTJ3	34	34	34	Structural maintenance of chromosomes protein 4	SMC4	sp|Q9NTJ3|SMC4_HUMAN Structural maintenance of chromosomes protein 4 OS=Homo sapiens OX=9606 GN=SMC4 PE=1 SV=2	1	34	34	34	12	12	15	15	13	12	13	17	19	16	12	12	15	15	13	12	13	17	19	16	12	12	15	15	13	12
Q9UQE7;REV__P16144	Structural maintenance of chromosomes protein 3	SMC3	1.0275	1.0281	1.0096	1.0814	1.0369	0.97059	0.63623	0.64201	1.6189	1.6093	Q9UQE7	73;1	73;1	72;1	Structural maintenance of chromosomes protein 3	SMC3	sp|Q9UQE7|SMC3_HUMAN Structural maintenance of chromosomes protein 3 OS=Homo sapiens OX=9606 GN=SMC3 PE=1 SV=2	2	73	73	72	30	31	35	33	34	39	42	42	42	40	30	31	35	33	34	39	42	42	42	40	30	31	35	33	33	38
O95347	Structural maintenance of chromosomes protein 2	SMC2	1.0341	1.0652	1.021	1.0664	1.0164	1.056	1.0948	1.0367	1.1309	1.1656	O95347	34	34	34	Structural maintenance of chromosomes protein 2	SMC2	sp|O95347|SMC2_HUMAN Structural maintenance of chromosomes protein 2 OS=Homo sapiens OX=9606 GN=SMC2 PE=1 SV=2	1	34	34	34	17	15	21	18	12	9	19	17	19	16	17	15	21	18	12	9	19	17	19	16	17	15	21	18	12	9
Q8NDV3	Structural maintenance of chromosomes protein 1B	SMC1B	0.73172	0.92565	0.85045	1.0627	0.76105	0.87988	0.87176	0.75666	NaN	NaN	Q8NDV3	2	2	2	Structural maintenance of chromosomes protein 1B	SMC1B	sp|Q8NDV3|SMC1B_HUMAN Structural maintenance of chromosomes protein 1B OS=Homo sapiens OX=9606 GN=SMC1B PE=2 SV=2	1	2	2	2	1	1	1	2	0	1	2	2	1	2	1	1	1	2	0	1	2	2	1	2	1	1	1	2	0	1
Q14683	Structural maintenance of chromosomes protein 1A	SMC1A	0.98735	1.0124	1.0056	0.99618	1.0185	0.98927	0.81719	0.82924	1.4895	1.5138	Q14683	72	72	71	Structural maintenance of chromosomes protein 1A	SMC1A	sp|Q14683|SMC1A_HUMAN Structural maintenance of chromosomes protein 1A OS=Homo sapiens OX=9606 GN=SMC1A PE=1 SV=2	1	72	72	71	22	24	34	30	33	33	36	35	39	37	22	24	34	30	33	33	36	35	39	37	22	24	33	30	33	33
Q969G3	SWI/SNF-related matrix-associated actin-dependent regulator of chromatin subfamily E member 1	SMARCE1	0.9484	0.91894	0.95999	0.96499	0.87917	0.87307	0.81562	0.89651	1.3767	1.2913	Q969G3	20	19	19	SWI/SNF-related matrix-associated actin-dependent regulator of chromatin subfamily E member 1	SMARCE1	sp|Q969G3|SMCE1_HUMAN SWI/SNF-related matrix-associated actin-dependent regulator of chromatin subfamily E member 1 OS=Homo sapiens OX=9606 GN=SMARCE1 PE=1 SV=2	1	20	19	19	8	7	6	5	11	13	11	9	7	6	7	6	6	5	11	13	10	8	7	6	7	6	6	5	11	13
Q92925	SWI/SNF-related matrix-associated actin-dependent regulator of chromatin subfamily D member 2	SMARCD2	0.99421	1.0084	1.046	1.0497	1.0785	1.0414	0.97626	0.99669	1.5413	1.5257	Q92925	20	20	17	SWI/SNF-related matrix-associated actin-dependent regulator of chromatin subfamily D member 2	SMARCD2	sp|Q92925|SMRD2_HUMAN SWI/SNF-related matrix-associated actin-dependent regulator of chromatin subfamily D member 2 OS=Homo sapiens OX=9606 GN=SMARCD2 PE=1 SV=3	1	20	20	17	12	12	12	14	11	9	16	15	14	14	12	12	12	14	11	9	16	15	14	14	9	9	9	11	8	6
Q96GM5	SWI/SNF-related matrix-associated actin-dependent regulator of chromatin subfamily D member 1	SMARCD1	0.89824	0.98506	1.0141	0.95057	0.90324	0.87788	0.83547	1.0604	1.3992	1.676	Q96GM5	8	6	5	SWI/SNF-related matrix-associated actin-dependent regulator of chromatin subfamily D member 1	SMARCD1	sp|Q96GM5|SMRD1_HUMAN SWI/SNF-related matrix-associated actin-dependent regulator of chromatin subfamily D member 1 OS=Homo sapiens OX=9606 GN=SMARCD1 PE=1 SV=2	1	8	6	5	5	4	4	4	4	4	5	4	5	5	3	2	2	2	2	2	3	2	3	3	3	2	2	2	2	2
Q8TAQ2	SWI/SNF complex subunit SMARCC2	SMARCC2	0.87577	0.9982	1.0382	1.0596	0.92861	0.94814	1.0577	1.1185	1.2597	1.2674	Q8TAQ2	40	31	31	SWI/SNF complex subunit SMARCC2	SMARCC2	sp|Q8TAQ2|SMRC2_HUMAN SWI/SNF complex subunit SMARCC2 OS=Homo sapiens OX=9606 GN=SMARCC2 PE=1 SV=1	1	40	31	31	16	20	19	18	17	15	20	19	15	16	11	13	13	12	10	9	15	14	10	11	11	13	13	12	10	9
Q92922	SWI/SNF complex subunit SMARCC1	SMARCC1	0.98604	1.014	0.97359	1.05	0.97093	1.0019	0.93218	0.93355	1.4786	1.5947	Q92922	48	48	39	SWI/SNF complex subunit SMARCC1	SMARCC1	sp|Q92922|SMRC1_HUMAN SWI/SNF complex subunit SMARCC1 OS=Homo sapiens OX=9606 GN=SMARCC1 PE=1 SV=3	1	48	48	39	26	25	29	24	25	23	27	29	28	23	26	25	29	24	25	23	27	29	28	23	21	18	23	18	18	17
Q12824	SWI/SNF-related matrix-associated actin-dependent regulator of chromatin subfamily B member 1	SMARCB1	0.92902	0.98716	0.9906	0.91791	0.96925	0.96258	1.0018	1.0976	1.5713	1.4806	Q12824	15	15	15	SWI/SNF-related matrix-associated actin-dependent regulator of chromatin subfamily B member 1	SMARCB1	sp|Q12824|SNF5_HUMAN SWI/SNF-related matrix-associated actin-dependent regulator of chromatin subfamily B member 1 OS=Homo sapiens OX=9606 GN=SMARCB1 PE=1 SV=2	1	15	15	15	5	5	9	5	6	6	9	7	7	4	5	5	9	5	6	6	9	7	7	4	5	5	9	5	6	6
Q9NZC9	SWI/SNF-related matrix-associated actin-dependent regulator of chromatin subfamily A-like protein 1	SMARCAL1	NaN	1.1627	1.3172	1.2132	1.6567	1.0786	NaN	1.4348	NaN	1.0042	Q9NZC9	4	4	4	SWI/SNF-related matrix-associated actin-dependent regulator of chromatin subfamily A-like protein 1	SMARCAL1	sp|Q9NZC9|SMAL1_HUMAN SWI/SNF-related matrix-associated actin-dependent regulator of chromatin subfamily A-like protein 1 OS=Homo sapiens OX=9606 GN=SMARCAL1 PE=1 SV=1	1	4	4	4	1	1	0	2	1	2	1	1	0	1	1	1	0	2	1	2	1	1	0	1	1	1	0	2	1	2
Q9H4L7;REV__Q4AC99	SWI/SNF-related matrix-associated actin-dependent regulator of chromatin subfamily A containing DEAD/H box 1	SMARCAD1	1.0339	1.068	1.1801	1.0148	0.95426	0.90635	1.0493	0.92664	0.80841	1.1268	Q9H4L7	19;1	19;1	19;1	SWI/SNF-related matrix-associated actin-dependent regulator of chromatin subfamily A containing DEAD/H box 1	SMARCAD1	sp|Q9H4L7|SMRCD_HUMAN SWI/SNF-related matrix-associated actin-dependent regulator of chromatin subfamily A containing DEAD/H box 1 OS=Homo sapiens OX=9606 GN=SMARCAD1 PE=1 SV=2	2	19	19	19	10	8	7	7	7	3	11	8	6	7	10	8	7	7	7	3	11	8	6	7	10	8	7	7	7	3
O60264	SWI/SNF-related matrix-associated actin-dependent regulator of chromatin subfamily A member 5	SMARCA5	0.98357	1.0096	0.98334	0.99127	0.95981	0.99431	0.93688	0.90007	1.2393	1.258	O60264	69	69	50	SWI/SNF-related matrix-associated actin-dependent regulator of chromatin subfamily A member 5	SMARCA5	sp|O60264|SMCA5_HUMAN SWI/SNF-related matrix-associated actin-dependent regulator of chromatin subfamily A member 5 OS=Homo sapiens OX=9606 GN=SMARCA5 PE=1 SV=1	1	69	69	50	37	39	39	38	37	38	40	45	40	40	37	39	39	38	37	38	40	45	40	40	25	27	27	27	26	27
P51532;REV__Q8N5H7	Transcription activator BRG1	SMARCA4	0.93547	0.96747	0.94708	0.95057	1.0013	0.90771	0.94425	0.96109	1.2652	1.2757	P51532	44;1	44;1	29;0	Transcription activator BRG1	SMARCA4	sp|P51532|SMCA4_HUMAN Transcription activator BRG1 OS=Homo sapiens OX=9606 GN=SMARCA4 PE=1 SV=2	2	44	44	29	23	22	19	20	22	22	26	26	22	21	23	22	19	20	22	22	26	26	22	21	14	14	11	11	15	15
P51531	Probable global transcription activator SNF2L2	SMARCA2	0.78479	NaN	0.66857	NaN	1.0522	0.61615	NaN	NaN	NaN	NaN	P51531	16	1	1	Probable global transcription activator SNF2L2	SMARCA2	sp|P51531|SMCA2_HUMAN Probable global transcription activator SNF2L2 OS=Homo sapiens OX=9606 GN=SMARCA2 PE=1 SV=2	1	16	1	1	10	8	8	9	7	7	11	11	10	8	1	0	0	0	0	0	1	1	1	0	1	0	0	0	0	0
P28370	Probable global transcription activator SNF2L1	SMARCA1	1.1315	1.1137	0.97804	1.1091	1.0887	0.96504	1.5486	1.4105	0.77761	NaN	P28370	22	3	3	Probable global transcription activator SNF2L1	SMARCA1	sp|P28370|SMCA1_HUMAN Probable global transcription activator SNF2L1 OS=Homo sapiens OX=9606 GN=SMARCA1 PE=1 SV=2	1	22	3	3	13	14	13	12	12	11	12	16	12	12	1	2	1	1	1	0	2	2	1	1	1	2	1	1	1	0
O00193	Small acidic protein	SMAP	0.97685	1.0433	1.0034	1.0024	1.0606	0.99394	1.1062	1.0882	1.0548	1.0739	O00193	6	6	6	Small acidic protein	SMAP	sp|O00193|SMAP_HUMAN Small acidic protein OS=Homo sapiens OX=9606 GN=SMAP PE=1 SV=1	1	6	6	6	2	2	2	2	4	5	3	2	2	2	2	2	2	2	4	5	3	2	2	2	2	2	2	2	4	5
Q0VAQ4	Small cell adhesion glycoprotein	SMAGP	1.2005	1.3406	1.2754	1.1334	1.2284	0.97142	1.2819	1.7286	NaN	NaN	Q0VAQ4	2	2	2	Small cell adhesion glycoprotein	SMAGP	sp|Q0VAQ4|SMAGP_HUMAN Small cell adhesion glycoprotein OS=Homo sapiens OX=9606 GN=SMAGP PE=1 SV=1	1	2	2	2	2	2	1	2	0	0	2	1	2	1	2	2	1	2	0	0	2	1	2	1	2	2	1	2	0	0
Q99717	Mothers against decapentaplegic homolog 5	SMAD5	1.0953	0.71184	1.0466	1.0189	1.1157	1.1317	0.84422	0.75988	1.4069	NaN	Q99717	4	3	2	Mothers against decapentaplegic homolog 5	SMAD5	sp|Q99717|SMAD5_HUMAN Mothers against decapentaplegic homolog 5 OS=Homo sapiens OX=9606 GN=SMAD5 PE=1 SV=1	1	4	3	2	3	2	2	2	4	1	3	3	4	3	2	1	1	1	3	0	2	2	3	2	2	1	1	1	2	0
Q13485	Mothers against decapentaplegic homolog 4	SMAD4	1.1653	1.1649	1.3629	1.0444	1.1858	1.054	1.3254	2.6981	1.1374	1.2217	Q13485	8	8	7	Mothers against decapentaplegic homolog 4	SMAD4	sp|Q13485|SMAD4_HUMAN Mothers against decapentaplegic homolog 4 OS=Homo sapiens OX=9606 GN=SMAD4 PE=1 SV=1	1	8	8	7	3	3	3	3	3	3	2	4	3	3	3	3	3	3	3	3	2	4	3	3	2	2	2	2	3	3
P84022;O15198	Mothers against decapentaplegic homolog 3	SMAD3	NaN	NaN	1.281	NaN	0.87824	NaN	0.60485	0.92321	NaN	NaN	P84022	5;2	1;0	1;0	Mothers against decapentaplegic homolog 3	SMAD3	sp|P84022|SMAD3_HUMAN Mothers against decapentaplegic homolog 3 OS=Homo sapiens OX=9606 GN=SMAD3 PE=1 SV=1	2	5	1	1	4	3	4	5	3	3	4	4	3	4	1	0	1	1	0	0	1	1	0	1	1	0	1	1	0	0
Q15796	Mothers against decapentaplegic homolog 2	SMAD2	0.99541	0.95356	0.97477	1.0624	1.0824	0.87452	0.87376	0.86096	0.81606	0.92893	Q15796	6	6	2	Mothers against decapentaplegic homolog 2	SMAD2	sp|Q15796|SMAD2_HUMAN Mothers against decapentaplegic homolog 2 OS=Homo sapiens OX=9606 GN=SMAD2 PE=1 SV=1	1	6	6	2	5	5	5	6	3	3	5	4	5	5	5	5	5	6	3	3	5	4	5	5	2	2	2	2	0	0
O95391	Pre-mRNA-splicing factor SLU7	SLU7	1.0183	1.1058	0.91079	1.0055	1.0338	1.0704	1.1772	1.047	0.9841	0.72737	O95391	5	5	5	Pre-mRNA-splicing factor SLU7	SLU7	sp|O95391|SLU7_HUMAN Pre-mRNA-splicing factor SLU7 OS=Homo sapiens OX=9606 GN=SLU7 PE=1 SV=2	1	5	5	5	1	1	1	2	1	2	2	4	1	1	1	1	1	2	1	2	2	4	1	1	1	1	1	2	1	2
[truncated: 4,602 more rows]
[truncated: 137 more columns]
