# Supplementary material for: The small CRL4CSA ubiquitin ligase component DDA1 regulates transcription-coupled repair dynamics
Source: Nat Commun. 2024 Jul 29;15:6374. doi: 10.1038/s41467-024-50584-7 (PMC11286758; doi:10.1038/s41467-024-50584-7)
Supplement: Supplementary file 10 — Supplementary Data 7 [file 41467_2024_50584_MOESM10_ESM.xlsx]

## Sheet: CSA DDA1KO vs CSA
Gene names	Protein IDs	-Log t-test p value	t-test Difference	CSAmClover Intensity (Log2) experiment 1	CSAmClover Intensity (Log2) experiment 2	CSAmClover Intensity (Log2) experiment 3	CSAmClover DDA1KO Intensity (Log2) experiment 1	CSAmClover DDA1KO Intensity (Log2) experiment 2	CSAmClover DDA1KO Intensity (Log2) experiment 3
A2ML1	A8K2U0	0.752725	4.99803	10.6187	0.972261	9.05147	11.4093	11.1333	13.0939
KRTAP13-4	Q3LI77	0.560616	4.46113	8.82564	11.3536	9.53253	15.9578	7.75535	19.3821
RTRAF	Q9Y224	0.45006	3.70469	8.1467	11.7565	-0.184263	10.7249	10.1435	9.96458
KRTAP3-1	Q9BYR8	0.531266	3.55568	12.8087	11.0088	10.2126	14.2094	10.3499	20.1378
KRTAP13-1	Q8IUC0	1.13643	3.5284	9.71774	9.41925	9.29715	12.777	10.6093	15.6331
LAMB3	Q13751	2.73967	3.04405	9.11468	9.17171	9.91367	12.9753	12.5005	11.8565
KRT84	Q9NSB2	0.458724	3.00391	12.406	10.7439	9.26159	17.65	8.65913	15.114
ANP32B	Q92688;Q92688-2	0.46253	2.39631	11.9609	8.80067	9.67302	8.48564	14.3799	14.758
KRTAP13-2	Q52LG2	0.179646	2.13509	20.3615	8.70612	8.44561	14.7371	10.7247	18.4567
PPP1R12A	F8VW28;F8VZN8;H0YHL8;O14974;O14974-2;O14974-3;O14974-4;O14974-5	1.40915	2.06852	12.1494	10.8545	10.4237	13.5231	12.3317	13.7783
TSEN54	A0A7P0TA59;A0A7P0Z413;E7EN92;J9JIH8;Q7Z6J9	1.43395	2.04843	10.461	9.91418	12.0867	13.0489	12.6275	12.9307
ERAL1	K7EQJ8;O75616	1.19091	2.01885	9.8387	9.03843	9.52921	12.3331	9.96666	12.1631
GM2A	P17900	0.85189	2.00544	9.60655	10.3294	13.1621	12.8584	12.9461	13.3098
COPS6	E7EM64;Q7L5N1	2.89094	1.98348	14.2752	14.2097	14.8515	16.6957	16.3543	16.2367
GPX4	A0A087WT12;A0A087X247;A0A087X2I2;K7EJ20;K7EKX7;K7ENB4;K7ERP4;P36969;P36969-2;R4GNE4	0.672463	1.95846	7.59284	11.6043	8.19422	11.6193	11.4161	10.2313
APOBEC3C	Q9NRW3	3.93328	1.93823	14.159	13.9526	14.0258	15.9382	16.2016	15.8122
PSMD11	J3QRY4;O00231;O00231-2	0.629841	1.91244	9.44185	13.4245	13.6001	13.8647	13.9496	14.3894
ANP32A	H0YN26;P39687	1.3394	1.81425	14.2248	14.396	13.3685	14.894	15.7484	16.7897
KRT36	O76013	0.297291	1.71378	17.6732	13.1293	11.5288	16.2766	13.1292	18.067
LYAR	Q9NX58	0.799927	1.70212	9.31648	9.99273	11.8755	10.8818	12.892	12.5173
DPYSL3	Q14195;Q14195-2	0.407835	1.70096	9.34648	9.0715	9.34095	8.2999	10.2582	14.3038
COPS7B	Q9H9Q2	0.849663	1.69173	14.9684	11.9351	14.2741	15.3774	15.6359	15.2394
DUSP4	Q13115	1.06662	1.68142	11.7941	9.61502	9.84776	11.5651	12.3761	12.3599
hCG_2039566;;H2AC17;H2AC7;H2AC12;H2AC14;H2AJ	A0A0U1RR32;A0A0U1RRH7;P0C0S8;P20671;Q96KK5;Q99878;Q9BTM1	1.70261	1.66404	12.9678	12.916	14.1909	15.3096	14.8007	14.9565
UVSSA	A0A7I2V3L2;A0A7I2V4K1;A0A7I2V554;Q2YD98	1.86736	1.6503	9.08211	9.39544	9.57916	11.1146	10.3235	11.5695
SERPINB5	C9JLM5;P36952;P36952-2	1.08147	1.64873	10.0199	11.3707	11.3928	12.6934	11.5629	13.4732
NOL11	J3QLQ6;Q9H8H0;Q9H8H0-2	0.603078	1.60538	8.75928	11.9474	12.342	12.2981	13.3555	12.2113
CTH	P32929	2.45087	1.58421	14.4117	13.6492	13.8958	15.467	15.8201	15.4222
PES1	B3KXD6;B5MCF9;O00541;O00541-2	0.445507	1.54708	8.57361	13.6495	11.4779	13.2693	12.4016	12.6715
TAGLN2	P37802;P37802-2;X6RJP6	0.393841	1.51588	9.61719	14.68	13.1578	14.2109	12.8262	14.9657
PROSER2	D3DRR9;Q86WR7;Q86WR7-2	3.48255	1.50077	11.687	11.7038	11.9531	13.369	13.0855	13.3917
ARAP1	Q96P48;Q96P48-3	1.59959	1.49625	8.62127	9.5336	9.90726	11.1781	10.5034	10.8693
TARS1	P26639;P26639-2	0.360462	1.45033	12.997	12.6853	7.91948	12.0047	13.1495	12.7985
HLTF	A0A0C4DGA6;H7C5K0;Q14527;Q14527-2	1.47355	1.4469	9.16091	9.23629	8.474	9.65033	10.6409	10.9206
ATOX1	O00244	2.64144	1.43807	14.6199	13.9103	14.358	15.7624	15.7252	15.7148
SCRIB	A0A0G2JNZ2;A0A0G2JPP5;A0A669KB89;Q14160;Q14160-3	2.15275	1.42773	10.5115	11.1423	10.4509	11.835	12.4331	12.1198
UBE2B	H0YA80;P63146	0.458469	1.42258	11.4747	13.9048	9.34671	13.0464	12.5541	13.3934
PSMD8	K7EJR3;K7ENY6;P48556;R4GMR5	0.511682	1.40669	9.1018	12.49	12.8858	12.7522	12.8609	13.0847
KRT81	A0A087X106;Q14533	0.135277	1.3627	17.2217	12.6689	9.30812	15.7181	8.84593	18.7228
TANC1	Q9C0D5;Q9C0D5-2	1.03088	1.36078	9.38681	11.4325	10.5147	11.5438	12.1631	11.7095
BTF3	A0A7I2V3T6;A0A7I2V5Y3;A0A7I2YQL2;D6RDG3;H0Y9Y1;P20290;P20290-2	0.412809	1.35536	9.73201	13.0409	14.1138	13.07	13.3286	14.5542
CCND1	P24385	1.32483	1.35237	11.9991	11.0027	10.3684	12.3797	12.5717	12.4759
DDX23	Q9BUQ8	0.578594	1.34299	10.3036	7.38184	10.2878	10.6054	11.3111	10.0857
LDLR	H0YMD1;J3KMZ9;P01130;P01130-3;P01130-4;P01130-5;P01130-6	1.57368	1.30909	12.2734	11.7855	13.0922	13.6392	13.6984	13.7408
CDA	P32320	4.41231	1.30847	14.6027	14.4399	14.4722	15.7439	15.894	15.8022
PDHA1	Q5JPU3	0.778936	1.29154	13.7572	11.8806	14.4203	14.7846	14.6272	14.5209
KRTAP3-2	Q9BYR7	0.257964	1.28562	13.1474	9.97916	12.8888	11.0957	12.1325	16.6441
RPS28	P62857	0.288446	1.26618	16.5764	11.3122	16.2956	15.055	16.4095	16.5183
SUPT6H	Q7KZ85	0.554658	1.22721	11.8104	13.1204	9.90832	13.1224	12.2357	13.1626
KRT34	O76011	0.160629	1.21612	13.9738	13.8898	12.3536	16.2239	9.1854	18.4564
RBX1	P62877	1.23426	1.1936	15.2121	14.0701	13.7585	15.5589	15.7128	15.3499
RANBP9	Q96S59;Q96S59-2;Q96S59-3	0.875159	1.15221	10.5995	8.92847	9.13542	10.1863	10.6599	11.2737
POLR2G	P62487	0.528316	1.12727	9.39603	6.25958	8.52259	9.10522	9.08218	9.3726
COPS8	E9PGT6;Q99627	0.772928	1.12096	16.656	14.3986	15.9118	16.6695	16.9148	16.745
MTREX	P42285	0.65707	1.09505	9.80917	11.9258	10.3952	12.583	11.6594	11.1729
KIAA0100	K7EQ86;Q08E86;Q14667;Q14667-2;Q14667-3	0.341818	1.0932	20.6385	16.4659	20.0214	19.6967	20.5479	20.1607
LAP3	P28838;P28838-2	0.193231	1.08547	15.9178	11.686	9.36975	12.3305	12.5263	15.3732
SCAF8;SCAF4;SCAF4;SCAF4;SCAF8;SCAF8	A0A0A0MT33;O95104;O95104-2;O95104-3;Q9UPN6;Q9UPN6-2	0.901893	1.0816	11.5253	12.159	10.297	12.25	12.6425	12.3336
COPS5	Q92905	1.84192	1.07933	14.2148	13.6905	13.346	14.9588	14.7527	14.7778
;FIP1L1;FIP1L1;FIP1L1;FIP1L1	A0A0B4J203;Q6UN15;Q6UN15-3;Q6UN15-4;Q6UN15-5	0.496494	1.05453	11.3254	14.1364	11.3886	13.3678	13.2907	13.3554
GOLGA4	Q13439;Q13439-3;Q13439-4;Q13439-5	2.07432	1.0527	12.0556	11.8173	11.9626	12.7687	13.4097	12.8152
MYH3	P11055	0.332902	1.03319	14.3219	10.4118	14.1219	13.9423	14.2511	13.7618
CTSC	A0A7I2V2Q8;A0A7I2V466;A0A7I2V5C5;A0A7I2V6E3;A0A7I2YQT5;H0YCY8;P53634	0.343378	1.01789	11.1194	9.36495	13.5614	12.6341	12.3866	12.0787
AQR	O60306	0.500525	1.01293	8.69025	11.0822	8.53578	10.2335	10.035	11.0785
OGA	O60502;O60502-4	0.637477	1.00059	9.43585	9.4497	11.5045	10.9251	11.4675	10.9992
DFFA	O00273;O00273-2	0.458431	0.98614	12.1419	11.0259	9.09254	11.9962	11.2167	12.0059
POLR2L	P62875	0.444729	0.980025	9.88917	12.4851	12.4683	11.853	13.1791	12.7506
DSN1	Q5JW54;Q9H410;Q9H410-2;Q9H410-3;Q9H410-4	0.615634	0.974716	10.0163	7.82835	8.6252	10.3864	9.67937	9.32829
ARF4	C9JAK5;C9JPM4;P18085;U3KQF2	0.31776	0.968461	11.0379	14.7699	11.0337	13.0821	13.4004	13.2642
LRRC42	A6NL66;E7EP35;Q9Y546	2.50823	0.956038	11.7954	11.8366	12.0832	12.756	13.1006	12.7267
MAGEB2	O15479	0.341282	0.955017	11.0125	14.9748	13.1196	14.0466	13.6666	14.2587
TUBB8	Q3ZCM7	0.966178	0.954708	11.7425	11.2043	12.7644	12.7824	12.7951	12.9977
IL18	Q14116;Q14116-2	0.961766	0.951796	13.0525	11.4646	12.2121	13.0768	13.3061	13.2017
BCLAF1	A0A1W2PQ43;E9PJA7;E9PK09;E9PK91;E9PKI6;E9PQN2;H0YF00;Q9NYF8;Q9NYF8-2;Q9NYF8-3;Q9NYF8-4	0.40392	0.951105	12.0047	13.8279	10.3981	13.0293	12.8201	13.2346
COPS4	Q9BT78	2.76388	0.950288	15.4601	15.6036	15.2289	16.3833	16.4936	16.2666
MYOF	Q9NZM1-3	0.290407	0.943519	20.2081	21.2725	16.9624	20.1579	20.2673	20.8485
NECAP1	A0A1W2PPF5;A0A1W2PR09;A0A1W2PR27;A0A1W2PRL5;A0A1W2PRM0;A0A1W2PRQ7;F5GYH1;Q8NC96;Q8NC96-2	0.349601	0.93984	10.8438	12.2739	8.75768	11.7963	12.2037	10.6949
POLR2I	K7EKS1;P36954	0.330129	0.939779	9.75653	13.5497	12.2134	13.453	12.7252	12.1607
MAPKAPK3;PRKY;MAPKAPK2;MAPKAPK2;PRKX;MAPKAPK3;TSSK3	C9J8E1;O43930;P49137;P49137-2;P51817;Q16644;Q96PN8	0.553976	0.939748	13.3322	10.8567	11.6239	12.5519	13.1345	12.9457
RSL1D1	I3L3U9;J3QSV6;O76021	1.60641	0.938655	12.7719	12.2713	12.941	13.3054	13.9165	13.5783
CUL4A	Q13619	1.35858	0.938149	14.04	14.3221	13.4149	14.8413	15.1856	14.5645
LEO1	Q8WVC0	0.274776	0.930994	12.0653	8.46273	12.6588	11.2809	12.2499	12.449
CHUK	O15111	0.344542	0.929886	7.94216	11.7499	10.4454	10.9181	10.9509	11.0582
PTPN12	C9J1X8;F8WB51;Q05209;Q05209-2;Q05209-3	0.671352	0.925022	9.92018	9.07817	9.21581	11.3153	10.3274	9.34661
TRIB1	Q96RU8	2.0562	0.921942	17.5661	17.0777	17.094	18.2292	18.3159	17.9585
NCL	A0A7I2V428;C9JLB1;H7BY16;P19338	0.606143	0.921403	15.5498	17.1925	15.3467	16.2909	17.078	17.4844
RCN2	A8MXP8;Q14257;Q14257-2	0.624656	0.884828	11.9885	11.1705	12.887	13.6756	12.6866	12.3382
HMOX2	P30519	0.406735	0.879221	9.69627	12.7512	11.8666	12.3931	12.0609	12.4978
EMC8	O43402;O43402-2	0.787413	0.876239	12.3138	11.0657	12.7688	12.8002	12.9462	13.0306
FBXO30	Q8TB52	0.752855	0.863532	10.6101	9.24998	10.7076	11.5276	10.8024	10.8283
KIAA0930	B0QY18;B0QY20;H7C1U5;Q6ICG6;Q6ICG6-2;Q6ICG6-3;V9GYW7;V9GZ62	1.42225	0.861962	11.7904	11.0396	11.5389	12.6697	12.1345	12.1506
GNAI2;GNAI2;GNAI2;GNAI2;GNAI2;GNAI3;GNAI1;GNAI1	P04899;P04899-2;P04899-3;P04899-5;P04899-6;P08754;P63096;P63096-2	0.581005	0.860205	9.55181	11.1234	9.08502	10.9326	11.09	10.3182
PSMD9	J3KN29;O00233	3.00706	0.838017	14.5416	14.6811	14.7989	15.4572	15.6359	15.4425
DDX41	Q9UJV9	0.354308	0.837767	10.6965	13.1429	10.0451	12.4508	12.3709	11.5762
ERCC6	Q03468	2.16104	0.836289	14.6661	14.6866	14.3131	15.2834	15.6108	15.2804
TRAF2	Q12933;Q12933-2;Q12933-3;Q12933-4	0.577658	0.828593	12.6076	10.5566	12.1114	12.4408	12.9127	12.4079
DSG1	Q02413-2	0.210628	0.827369	11.3103	10.7261	15.4657	13.3953	12.773	13.8159
RBBP7	E9PC52;Q16576	0.206764	0.819419	14.5208	9.74841	14.0703	13.4634	13.9659	13.3685
SRR	Q9GZT4	0.725241	0.817107	10.576	10.4057	9.27002	11.2956	11.1244	10.283
RPS10-NUDT3;RPS10-NUDT3;RPS10;RPS10;RPS10;RPS10	A0A1W2PQS6;A0A2R8Y6L3;A0A2R8Y7H1;A0A2R8YFH6;F6U211;P46783	0.760246	0.816397	14.1496	15.4274	14.2574	15.7709	14.8804	15.6323
BRIX1	Q8TDN6	1.70595	0.809321	12.5571	12.078	11.8394	12.8874	12.9952	13.0198
YWHAE	P62258;P62258-2	1.03734	0.791417	11.1758	11.3946	10.2946	11.9563	11.5272	11.7557
AP2A1	O95782;O95782-2	0.353202	0.78898	10.8677	9.50395	7.66606	10.1891	10.167	10.0485
WDR6	A0A087X295;Q9NNW5	0.48464	0.784828	9.95786	12.3056	11.3271	12.1786	12.1452	11.6213
COPS3	Q9UNS2	1.77425	0.775838	16.6942	16.3425	16.0581	17.0204	17.2587	17.1432
COPS7A	Q9UBW8	1.70114	0.760036	14.2565	13.6389	13.7803	14.5953	14.8066	14.5539
RPS15	A0A0B4J2B4;K7EJ78;K7ELC2;K7EM56;K7EQJ5;P62841;S4R417;S4R456	1.66886	0.752849	13.1717	12.9179	13.5932	13.8675	14.0151	14.0588
PSMD12	O00232	0.22144	0.744912	8.59297	12.0662	12.4686	11.9182	10.9406	12.5037
NUP88	I3L245;J3KMX1;Q99567	0.551188	0.74474	8.47475	10.1208	9.99932	10.0185	10.832	9.97852
PCID2	Q5JVF3;Q5JVF3-2;Q5JVF3-3;Q5JVF3-4	0.312459	0.730046	9.65768	12.6002	12.3653	12.3399	12.473	12.0004
RPP40	A0A087X1N3;F8WC38;O75818;O75818-2	1.67764	0.724189	12.8293	12.7885	12.7791	13.5556	13.8446	13.1693
AGTPBP1	J3KNS1;Q9UPW5	2.16532	0.722411	13.9986	14.3682	13.9935	14.899	14.9186	14.7099
HDAC6	Q9UBN7	2.37579	0.7199	19.5876	19.3188	19.6191	20.0754	20.3232	20.2866
ASB3	Q9Y575;Q9Y575-2;Q9Y575-3	0.731452	0.711282	14.4792	13.094	13.2486	14.1763	14.3266	14.4527
KRT6B	P04259	0.212847	0.709485	18.5605	19.1357	21.9461	21.1714	19.0809	21.5185
OSBPL10	Q9BXB5;Q9BXB5-2	0.308401	0.707269	11.497	9.16637	12.2178	11.5903	11.9813	11.4314
OGFR	Q9NZT2;Q9NZT2-2	1.21638	0.706145	13.7691	14.4602	14.4539	14.9664	15.1718	14.6634
KRT15	P19012	0.753068	0.7061	10.2181	9.27805	8.77662	10.0918	10.2918	10.0074
TNS4	Q8IZW8	1.22083	0.703449	12.9254	13.5388	12.6466	13.6653	13.8631	13.6928
CUL4B	A0A669KAX4;Q13620-1	1.44115	0.699401	15.3544	15.6731	15.0084	15.8459	16.2559	16.0322
HPF1	Q9NWY4	0.271874	0.691516	11.2487	8.37729	10.6038	9.83803	11.6785	10.7878
RPL29	A0A3B3ITT5;P47914	0.477468	0.690352	16.6095	14.4693	15.4479	16.0484	16.4032	16.1463
COPS2	P61201;P61201-2	2.10912	0.690006	15.2523	15.3957	14.9551	15.9012	15.9741	15.7977
ERH	G3V279;P84090	0.368516	0.688385	13.3591	15.3043	13.1864	14.7962	13.9041	15.2147
LGALS7B	P47929	0.474146	0.683522	14.7893	15.5728	16.2065	16.3983	15.31	16.9109
UMPS	E9PFD2;F2Z303;F2Z3P2;F8WDG4;P11172	0.805423	0.683003	9.79899	10.8149	10.6692	10.7935	11.5593	10.9794
EPS8L2	A0A3B3ISQ4;Q9H6S3	1.2344	0.6828	15.2771	14.3787	14.8356	15.5039	15.5423	15.4936
CRNKL1	Q5JY65;Q9BZJ0;Q9BZJ0-2;Q9BZJ0-3	0.520195	0.677707	9.03763	10.7247	10.4604	10.8635	10.3093	11.0831
PFKFB3;PFKFB3;PFKFB3;PFKFB1;PFKFB2;PFKFB2;PFKFB1;PFKFB1;PFKFB3;PFKFB3;PFKFB3;PFKFB3;PFKFB4;PFKFB4;PFKFB4;PFKFB1;PFKFB3;PFKFB3;PFKFB4	A0A1W2PR17;F2Z2I2;H0Y483;I1Z9G3;O60825;O60825-2;P16118;P16118-2;Q16875;Q16875-2;Q16875-3;Q16875-4;Q16877;Q16877-2;Q16877-3;Q4VBA9;Q5VX20;Q5W015;Q66S35	0.228376	0.677629	11.255	14.4167	10.8045	13.1978	12.3777	12.9336
CKAP5	Q14008;Q14008-2;Q14008-3	0.739657	0.665698	11.1833	11.0543	12.3238	12.3612	12.1048	12.0924
ZFYVE16	Q7Z3T8;Q7Z3T8-3	0.756499	0.664695	12.4259	11.5655	11.0901	12.2424	12.5612	12.2721
RBFOX1;RBFOX2;RBFOX2;RBFOX1;RBFOX3;RBFOX1;RBFOX1;RBFOX1;RBFOX1;RBFOX1;RBFOX1;RBFOX3;RBFOX3;RBFOX2;RBFOX2;RBFOX2;RBFOX2;RBFOX1;RBFOX1;RBFOX1;RBFOX1;RBFOX1;RBFOX1;RBFOX1;RBFOX3;RBFOX3;RBFOX2;RBFOX2;RBFOX2;RBFOX2;RBFOX2;RBFOX2;RBFOX2;RBFOX2;RBFOX2;RBFOX1;RBFOX1;RBFOX1;RBFOX1;RBFOX1;RBFOX2	A0A087X2B1;A0A0G2JRA5;A0A0G2JSB3;A0A286YEU2;A0A3B3ITL7;A0A6Q8PFM4;A0A6Q8PGE0;A0A6Q8PH77;A0A6Q8PHA3;A0A804HJM2;A0A804HKG7;A6NFN3;A6NFN3-2;B0QYV1;B0QYY4;B0QYY6;B0QYY7;B7Z1U7;F5H0M1;F8VR27;F8VZG9;F8VZY7;I3L1D4;J3KNW3;J3QQZ2;J3QRF4;O43251;O43251-10;O43251-2;O43251-4;O43251-5;O43251-6;O43251-7;O43251-8;O43251-9;Q9NWB1;Q9NWB1-2;Q9NWB1-3;Q9NWB1-4;Q9NWB1-5;S4R469	0.702723	0.663392	12.4071	12.5061	13.1651	13.9524	13.4042	12.7118
PSMD13	A0A087WUL9;Q9UNM6;Q9UNM6-2	0.797017	0.662635	10.3172	11.109	11.6149	11.554	11.678	11.797
GTPBP4	Q9BZE4;Q9BZE4-2	0.150807	0.660574	15.9065	13.7853	10.5074	13.1613	14.4806	14.539
MYO1B	E9PDF6;O43795;O43795-2	1.6941	0.66043	13.1461	12.7958	13.3824	13.8408	13.6794	13.7854
RPL5	A0A2R8Y6J3;P46777	1.8859	0.660023	16.2519	16.3703	16.1761	17.0502	17.0894	16.6389
RPL21	P46778	0.895853	0.658115	15.0553	13.9787	14.1727	15.0164	14.9363	15.2284
DOCK7	Q96N67;Q96N67-2;Q96N67-3;Q96N67-4;Q96N67-5;Q96N67-6	1.84646	0.657244	12.7083	12.4413	12.2485	12.9594	13.2471	13.1633
KRT33B	Q14525	0.0876996	0.656286	17.7566	14.4647	12.7401	16.3375	11.5094	19.0833
MMS19	Q96T76;Q96T76-8;Q96T76-9	1.04196	0.65306	12.1169	13.0843	12.8774	13.3376	13.3718	13.3284
PPAT	Q06203	0.667332	0.639411	10.9574	10.4486	11.3328	11.2161	11.187	12.254
DHX34	Q14147	0.360055	0.638733	9.0312	10.5317	11.0613	10.7795	11.6073	10.1535
NAA35	Q5VZE5	0.274211	0.635572	12.6755	10.9047	9.49745	11.3839	11.8243	11.7761
TIMP4	Q99727	0.0647789	0.629124	21.4907	13.438	11.7854	15.3853	13.9948	19.2213
STOML2	Q9UJZ1;Q9UJZ1-2	0.641273	0.609763	11.9827	12.9083	13.2598	13.6983	13.0236	13.2582
GPS1	C9JFE4;Q13098;Q13098-5;Q13098-7	0.815436	0.604437	16.3323	16.1737	15.2425	16.427	16.562	16.5728
PNN	Q9H307	0.479156	0.601414	12.3439	14.1889	13.0378	13.9652	13.6899	13.7198
GNL3	Q9BVP2;Q9BVP2-2	1.19704	0.597154	12.7132	13.1526	12.352	13.2619	13.3698	13.3774
ELOC	E5RHG8;Q15369	1.41082	0.591138	13.7385	14.4058	14.1497	14.6917	14.6566	14.719
SH3RF1	Q7Z6J0;Q7Z6J0-3	0.499047	0.590378	9.93935	9.59903	10.1718	10.3977	11.385	9.69866
OTULIN	Q96BN8	0.897251	0.590053	10.8983	10.0152	10.607	11.1999	11.3132	10.7776
TDP1	E7EPD8;G3V2F4;H0YJ44;Q9NUW8;Q9NUW8-2	0.173179	0.58015	12.3254	12.1147	8.66578	10.7306	11.9243	12.1914
LRRC15	Q8TF66;Q8TF66-2	0.0561805	0.577126	17.7128	11.4825	11.8586	14.6092	9.04213	19.1338
NUFIP2	Q7Z417	0.457044	0.574979	12.9506	11.4786	11.2079	12.4988	12.4808	12.3824
LARP1	A0A0B4J210;Q6PKG0	0.411467	0.571887	12.8536	11.1191	11.7945	11.8901	12.8877	12.7051
EXOSC7	Q15024	0.778285	0.5698	13.1202	11.9872	12.6977	13.1961	13.0435	13.2748
VPS37B	F5H1F6;F5H4M0;Q9H9H4	0.530694	0.564655	12.9841	14.0671	14.1692	14.8544	14.0603	13.9996
NARF	E7EP87;Q9UHQ1;Q9UHQ1-3;Q9UHQ1-4	0.649533	0.564052	13.901	12.5887	13.4538	13.7895	14.029	13.8172
MRPL36	Q9P0J6	0.629265	0.546666	14.9253	13.896	13.6875	14.5906	14.869	14.6892
RPS3A	P61247	2.45097	0.544326	17.7175	17.5249	17.5481	18.0141	18.2224	18.187
RBIS	A0A087WWE7;Q8N0T1	1.49754	0.54075	13.3401	13.5505	13.5688	13.7359	14.2361	14.1096
RPLP1	P05386	1.58581	0.537978	19.0536	18.5592	18.7613	19.3669	19.4103	19.2109
;NDUFA9;NDUFA9	A0A3B3ISG8;F5GY40;Q16795	0.299172	0.536296	9.06497	9.63272	10.3917	9.03348	11.0927	10.5721
THRAP3	A0A3B3ITZ9;Q9Y2W1	1.03748	0.529756	13.0952	12.7335	12.267	13.2299	13.2398	13.2153
SERPINB1	P30740	2.0323	0.528709	14.4905	14.6845	14.3878	15.0459	15.1747	14.9283
RDH10	E5RK48;Q8IZV5	0.471775	0.527985	10.7297	10.8438	9.38267	10.849	11.0579	10.6333
RPS24	A0A2R8Y849;A0A2R8YD14;E7ETK0;P62847;P62847-2;P62847-3;P62847-4	1.43584	0.526736	15.5995	15.0874	15.2876	15.6974	15.9821	15.8752
TBC1D24	A0A2R8Y518;H3BV07;Q9ULP9;Q9ULP9-2	0.504729	0.526284	11.6367	12.457	13.1073	12.9608	13.1926	12.6265
IGF2BP3	O00425;O00425-2	0.404424	0.523001	11.9743	11.857	13.0526	13.1704	12.0298	13.2527
TSG101	F5H442;Q99816;Q99816-2	1.00776	0.522547	13.6393	14.1896	13.9978	14.2973	14.8288	14.2684
GEMIN4	I3L2C7;P57678	0.431839	0.520569	10.3128	11.9437	11.5154	12.0357	11.4661	11.832
ERCC3	A0A2R8Y6W8;P19447	0.480295	0.513236	10.1421	8.73095	8.83876	9.87854	9.81774	9.55523
ACACA	Q13085;Q13085-2;Q13085-3;Q13085-4	1.39521	0.509058	13.7688	13.4761	13.9503	14.072	14.4159	14.2344
GPI	A0A2U3TZU2;P06744;P06744-2	0.697481	0.499596	10.9622	11.7872	11.1877	11.732	11.4871	12.2169
ACSF3	A0A3B3ISK9;Q4G176	1.85017	0.4942	12.6668	12.3259	12.5408	12.8795	13.0945	13.0422
UBA6	A0AVT1	2.64407	0.493434	15.6385	15.4611	15.4619	15.9571	16.0905	15.9942
TSPYL1	Q9H0U9	0.773877	0.493428	9.50022	9.54486	9.79135	9.63807	10.074	10.6046
MINPP1	Q9UNW1;Q9UNW1-2;Q9UNW1-3	0.809199	0.492692	11.8102	10.9633	11.7011	11.9682	12.1521	11.8324
TMLHE	Q9NVH6;Q9NVH6-5;Q9NVH6-6;Q9NVH6-7;Q9NVH6-8	0.4391	0.488571	14.6907	16.264	15.0735	15.8818	15.8965	15.7156
UNG	F5GYA2;P13051;P13051-2	0.735247	0.48654	11.7503	12.6037	12.2701	12.6004	12.4511	13.0322
MAPKAP1	B1AMB1;B1AMB2;Q9BPZ7;Q9BPZ7-2;Q9BPZ7-3;Q9BPZ7-5;Q9BPZ7-6	0.282624	0.482712	10.1021	9.78031	10.0544	9.12382	11.3495	10.9116
TUBG1;TUBG2	P23258;Q9NRH3	0.472319	0.482703	13.0768	12.337	12.2552	13.3623	13.4299	12.3249
RPS27	P42677	1.63056	0.482026	14.4344	14.0888	14.3223	14.6472	14.7062	14.9382
RPL28	H0YKD8;H0YMF4;P46779;P46779-2;P46779-3;P46779-4;P46779-5	0.950047	0.478926	17.2964	16.5838	17.0252	17.2247	17.5387	17.5787
PIAS2;PIAS2;PIAS3;PIAS3;PIAS2;PIAS2;PIAS2;PIAS2;PIAS2;PIAS2;PIAS2;PIAS3;PIAS3	A0A087WUY7;A0A0A0MS92;E7ESB4;E9PHH8;K7EJT4;K7EMP6;K7EQX5;K7ER97;O75928;O75928-2;O75928-3;Q9Y6X2;U3KQV1	0.552172	0.478045	11.3427	10.2758	11.1601	11.1679	11.7934	11.2515
RAB40C	H3BME4;H3BNV8;H3BPA5;H3BTC6;Q96S21;Q96S21-2	0.438816	0.477674	12.2619	12.7873	12.1741	12.1574	13.632	12.8669
EXOSC9	D6RIY6;Q06265;Q06265-2;Q06265-3;Q06265-4	2.48947	0.475996	13.2615	13.3847	13.446	13.7354	13.8847	13.9002
RPSA	A0A0C4DG17;C9J9K3;P08865	1.69724	0.474466	17.1961	17.4826	17.5406	17.8259	18.0176	17.7993
RTN3	B7Z4M1;O95197-3;O95197-5;O95197-6	0.249751	0.471009	9.63984	11.9866	11.4448	11.6469	11.803	11.0344
NOC4L	F5H303;Q9BVI4	0.902744	0.468314	10.6394	11.0347	11.2075	11.7347	11.1318	11.42
PCNA	P12004	0.338425	0.466595	10.8211	10.6576	11.9894	11.6454	12.2788	10.9437
CPSF7	Q8N684;Q8N684-3	0.0775951	0.466499	15.7003	17.1998	10.5013	15.5145	15.5564	13.73
RPS23	P62266	1.07748	0.466375	16.5945	16.1564	16.0191	16.5106	16.8228	16.8357
MASTL	A0A087WUU7;Q96GX5;Q96GX5-2;Q96GX5-3	0.976355	0.461533	12.3956	11.9694	12.6305	12.9379	12.5825	12.8596
TEX10	Q9NXF1;Q9NXF1-2	0.653228	0.461273	9.98306	10.8424	10.2142	10.4478	10.8827	11.0931
RO60	P10155;P10155-3;P10155-4;P10155-5	0.249421	0.459364	9.91282	12.2877	11.5803	11.8178	11.3503	11.9909
MPP7	Q5T2T1	0.208118	0.456212	13.8165	13.394	11.1612	13.2353	12.9015	13.6035
ALDH1A3	H0Y2X5;P47895	0.463317	0.456131	13.9659	12.7904	12.7421	13.4782	13.9118	13.4768
RRP12	Q5JTH9;Q5JTH9-2;Q5JTH9-3	1.50201	0.456067	13.4189	13.8568	13.682	14.0841	14.2217	14.0201
RPL4	P36578	1.63819	0.454305	16.3255	16.2243	16.0646	16.4681	16.8132	16.6959
DHX40	F5H625;Q8IX18;Q8IX18-2;Q8IX18-3;Q8IX18-4	0.323356	0.453723	10.243	12.1276	10.9143	11.6167	11.7968	11.2326
RPS14	A0A2R8Y811;P62263	0.628819	0.45124	16.8256	15.7535	16.3832	16.5971	16.8616	16.8573
TRIM5	A0A804HHS7;Q9C035;Q9C035-2;Q9C035-3;Q9C035-4	0.374899	0.450557	9.94468	11.3133	11.2662	11.3741	10.8596	11.6422
NAF1	Q96HR8;Q96HR8-2	0.233842	0.448733	9.90611	12.4508	11.2641	11.945	11.6535	11.3687
MFAP1	P55081	0.420474	0.446375	13.8578	14.3331	12.8136	14.008	14.1273	14.2083
GON7	Q9BXV9	0.238253	0.445909	10.1732	11.3189	9.33286	11.6362	10.3466	10.1799
EIF3L	B0QY89;Q9Y262	0.308395	0.445861	12.2272	14.1622	13.0295	13.9168	13.2961	13.5435
R3HDM1	A0A804HIA8;H7C1X4;H7C207;Q15032;Q15032-2;Q15032-3;Q15032-4	0.261813	0.443501	9.63526	11.3408	9.3362	10.4718	11.0267	10.1443
H2AC8;H2AW;H2AC6	P04908;Q7L7L0;Q93077	2.04165	0.443411	18.418	18.7229	18.4747	18.98	18.9785	18.9874
RPL27A	E9PLL6;P46776	0.615933	0.441123	18.0471	17.0331	17.4874	17.7644	18.2137	17.9129
ADAT2	Q7Z6V5;Q7Z6V5-2	0.309782	0.437955	10.5462	12.326	11.6555	12.3304	11.4723	12.0388
MYBBP1A	I3L1L3;Q9BQG0;Q9BQG0-2	0.365477	0.435502	10.5457	10.858	9.91028	10.1295	11.5538	10.9371
IGHV3-72	A0A4W8ZXM2	0.685653	0.432187	23.7055	24.5598	23.9521	24.6167	24.2391	24.6582
NOP56	A0A494C128;H0Y653;H0YDU4;O00567	1.49885	0.431877	10.8172	10.6446	10.9585	11.4337	11.1514	11.1309
PTER	Q96BW5;Q96BW5-2	1.19671	0.431823	15.3008	14.7426	15.0625	15.5491	15.4792	15.3731
ITPK1	Q13572	1.77616	0.430378	15.2951	14.9895	15.242	15.5007	15.635	15.682
RPL10A	P62906	1.7755	0.426327	15.5933	15.5035	15.3715	15.7439	15.9842	16.0191
CLNS1A	E9PJF4;E9PMI6;J3KN38;P54105	2.71859	0.422156	14.3072	14.4081	14.3297	14.7071	14.8679	14.7365
ITGB4	P16144;P16144-2;P16144-3;P16144-4	1.07725	0.421657	12.9405	12.5302	12.87	13.0489	13.4678	13.0891
RPS13	P62277	1.77047	0.421481	17.19	16.9748	17.0039	17.3333	17.621	17.4788
FBLL1;FBL;FBL;FBL;FBL;FBL	A6NHQ2;M0QXL5;M0R0P1;M0R299;M0R2Q4;P22087	1.67489	0.417887	13.6928	13.6147	13.4459	14.1538	14.0007	13.8526
RNGTT	O60942;O60942-2	0.144293	0.414383	10.1849	13.5381	10.9415	12.6188	11.6549	11.634
SP100;SP100;SP140L;SP100;SP100;SP100;SP100;SP100;SP100;SP100;SP140L;SP140L;SP140L;SP140L	C9JBL0;E9PHV6;H7BYP4;P23497;P23497-2;P23497-3;P23497-4;P23497-5;P23497-6;P23497-7;Q9H930;Q9H930-1;Q9H930-2;U5Y3L1	0.132813	0.407849	9.6615	12.8875	10.9136	11.3883	10.5689	12.729
AGL	P35573;P35573-2;P35573-3	1.2817	0.404645	13.9748	13.8426	13.9834	14.606	14.2803	14.1284
ABCE1	D6R9I9;P61221	0.224576	0.404212	11.185	13.1815	13.2387	12.5461	13.1418	13.13
UEVLD	Q8IX04;Q8IX04-2;Q8IX04-3;Q8IX04-4;Q8IX04-6	0.779917	0.404051	11.9301	11.1441	11.3527	11.9032	11.9383	11.7975
RPS6	P62753	0.836074	0.403616	17.0386	16.4489	16.4218	16.8605	17.1989	17.0607
VASP	P50552	0.263834	0.401904	9.24732	10.7465	11.0572	11.0473	10.9319	10.2776
SYF2	O95926;O95926-2	0.624295	0.401474	12.6835	11.9507	11.9857	12.9343	12.4656	12.4244
;RPL26;RPL26;RPL26;RPL26	J3QQQ9;J3QQV1;J3QRC4;J3QRI7;P61254	1.60763	0.399718	16.3657	16.0395	16.2939	16.5219	16.7063	16.6699
UBE3C	Q15386;Q15386-2	1.18701	0.399593	12.9487	12.5205	12.9917	13.3181	13.1667	13.1748
HAS1	G3V1S7;M0QXH4;M0R2V0;Q92839	1.25245	0.398507	18.415	18.9114	18.6167	18.9697	19.07	19.0989
RIF1	H7C2B5;Q5UIP0;Q5UIP0-2	0.398621	0.398459	11.9581	13.0288	12.7727	13.3866	13.1049	12.4635
RPL34	P49207	0.479287	0.395401	15.7075	14.6933	14.7491	15.3443	15.7247	15.2672
SON	P18583-5	0.788078	0.393635	13.9417	13.7385	13.2707	13.9306	13.9235	14.2778
H2BC11;H2BC17;H2BC3;H2BC21	P06899;P23527;P33778;Q16778	1.04195	0.393153	15.698	15.2813	15.5246	15.6397	16.0639	15.9797
CARMIL2	Q6F5E8;Q6F5E8-2	0.369255	0.392445	14.3313	12.9563	13.1781	13.6704	14.1086	13.864
SIAH1	Q8IUQ4;Q8IUQ4-2	1.12928	0.390621	15.6916	15.8187	15.761	15.8582	16.4041	16.1809
RPL27	P61353	1.17003	0.389688	17.2897	16.8617	17.0358	17.262	17.5361	17.5582
GDI2	P50395	0.184398	0.389389	11.7613	14.0623	14.1219	14.1243	13.541	13.4483
CDC5L	Q99459	0.264451	0.389374	11.2652	12.933	11.322	12.6283	11.8863	12.1737
RPL23A	A8MUS3;H7BY10;K7EMA7;K7ERT8;P62750	1.39375	0.389319	14.3405	14.2351	13.9267	14.6354	14.5217	14.5131
RPL8	P62917	1.42391	0.386026	16.2202	15.958	15.9063	16.2548	16.4749	16.5129
DDB1	Q16531	1.01399	0.384607	21.7216	21.3999	21.1825	21.6732	21.9665	21.8181
RPS19	P39019	0.69928	0.384439	15.0394	15.5165	14.7828	15.421	15.3223	15.7487
MAPK1	P28482	1.13554	0.381666	14.7157	14.8645	15.0719	15.3432	15.423	15.0308
ALDH1B1	P30837	0.205884	0.377028	10.4932	12.7054	10.8367	11.5903	12.0574	11.5188
RPL15	P61313	1.07668	0.376732	17.0891	16.6343	16.805	17.0536	17.3904	17.2145
SF1	H7C0N4	0.247691	0.373564	14.6997	12.7075	13.2676	13.8114	13.9432	14.0409
RPS26	P62854	0.393514	0.36801	17.474	16.1741	17.02	17.1078	17.4577	17.2066
NOP58	H7BZ72;Q9Y2X3	0.91407	0.367179	11.7957	11.4203	11.7317	12.2362	11.7363	12.0767
RPL7	P18124	0.611012	0.365845	17.4258	16.5667	17.0514	17.1781	17.499	17.4643
DDX21	Q9NR30;Q9NR30-2	1.14146	0.363616	14.3103	14.6767	14.5619	14.7404	15.0823	14.817
EIF3E	A0A7I2V2H9;A0A7I2V2W0;A0A7I2V3I0;A0A7I2V3I2;A0A7I2V3S3;A0A7I2V4B4;B3KW56;P60228	0.459814	0.363327	12.3508	13.5019	12.8702	13.4205	13.2035	13.1889
RPL7A	P62424	1.4871	0.362924	16.5578	16.6904	16.4106	16.8074	16.8705	17.0697
HSPA8	P11142	1.71972	0.36271	19.6384	19.8081	19.4847	20.0303	20.0208	19.9682
SAE1	A0A590UK93;A0A590UKC5;B3KNJ4;M0QX65;M0QYM8;M0R054;Q9UBE0;Q9UBE0-2;Q9UBE0-3	0.539534	0.36167	12.2974	12.0732	11.5399	12.3061	12.6776	12.0119
SLC4A5	A0A1B0GVY3	0.500908	0.359072	19.3398	18.4775	19.2454	19.1568	19.6741	19.309
TIGAR	Q9NQ88	0.825654	0.355918	13.9483	13.4205	14.0006	14.0535	14.2936	14.09
KRT85	P78386	0.0373012	0.355584	18.7571	14.9647	12.6743	16.5878	10.805	20.0701
TNPO1	A0A7P0Z4D3;Q92973;Q92973-2;Q92973-3	0.217756	0.354407	14.0558	12.102	13.1177	13.6082	13.8441	12.8865
TRA2A	Q13595;Q13595-2;Q13595-3;Q13595-4	0.470604	0.353911	14.6491	14.8227	13.7706	14.7781	14.7728	14.7532
SEC22A	C9J463;C9JDJ8;C9JNZ0;C9JR77;C9JRY4;C9JZ27;F8WAU7;Q96IW7	0.42161	0.353357	14.3169	13.6076	13.1921	13.7795	14.2328	14.1642
EXOSC2	Q13868	1.70908	0.352254	13.0572	12.8747	12.7371	13.2553	13.2498	13.2207
PGAM1	P18669	0.244321	0.351007	12.3128	11.8782	12.8335	11.7049	13.1092	13.2635
LRRC1	Q9BTT6;Q9BTT6-2	0.615119	0.347033	13.605	12.7486	13.3035	13.5561	13.6324	13.5098
DAP3	P51398;P51398-2;P51398-3;V9GYA7;V9GYF7;V9GYW1;V9GZ61	0.392646	0.342605	13.192	12.5063	13.7395	13.5196	13.6292	13.3168
SMN1;SMN1;SMN2;SMN1;SMN1;SMN2;SMN2;SMN2;SMN2;SMN2	A0A0G2JRX5;A0A0G2JRY6;A0A1W2PRV5;B4DP61;E7EQZ4;H0YBZ9;Q16637;Q16637-2;Q16637-3;Q16637-4	0.428413	0.339233	14.9891	13.9291	14.7569	15.0256	14.9781	14.689
KLK11	M0QYW4;M0R151;Q9UBX7;Q9UBX7-1;Q9UBX7-3;Q9UBX7-4	0.367201	0.339104	17.7578	16.743	17.4138	17.2475	18.093	17.5914
PSMF1	Q5QPM7;Q5QPM9;Q92530	0.249496	0.335596	11.6214	12.668	12.0589	13.0899	11.613	12.6522
ELP2	Q6IA86;Q6IA86-2;Q6IA86-3;Q6IA86-4;Q6IA86-5;Q6IA86-6;Q6IA86-7	0.103054	0.332369	10.4233	12.7524	9.59045	12.4187	11.2524	10.0923
HDAC1	Q13547	0.386173	0.331671	11.9494	13.1288	12.2774	12.7438	12.947	12.6598
RPS4X	P62701	2.4726	0.330497	17.043	17.213	17.1207	17.4836	17.467	17.4176
RPL3	P39023	0.614996	0.326434	16.7588	16.0358	16.5104	16.5451	16.8886	16.8508
BUD31	P41223	0.114973	0.326042	10.9301	11.6655	8.45362	10.3085	10.3599	11.359
USP19	E7ESU0;O94966;O94966-3;O94966-4;O94966-5;O94966-6;O94966-7	0.213233	0.323682	12.9575	11.4722	11.9635	12.2753	11.8775	13.2116
FBXO22	Q8NEZ5	0.684228	0.322949	16.1849	15.5715	15.8174	15.9875	16.3996	16.1556
ANKRD39	Q53RE8	0.91542	0.321861	12.8103	12.5767	13.0168	13.3305	13.0298	13.0091
RPL35A	P18077	1.60611	0.319544	16.4491	16.262	16.4579	16.6759	16.8347	16.6171
CYFIP2	E7EVJ5;Q96F07;Q96F07-2	0.170425	0.31612	10.9484	13.3532	12.1212	12.6421	12.3113	12.4178
LIMD1	C9JRJ5;Q9UGP4	0.322116	0.315275	12.8038	12.6829	11.8617	12.9431	13.1196	12.2315
RPLP0	P05388	0.870701	0.314335	16.9024	17.4702	17.1188	17.4248	17.5255	17.4841
PLAA	Q9Y263	0.209595	0.312968	10.568	10.5649	8.87159	10.5606	10.2179	10.1649
ATP5PO	P48047	0.200646	0.311741	15.8677	17.3276	15.9089	16.3387	17.3951	16.3056
KEAP1	Q14145	0.39927	0.310945	14.6814	13.7963	13.9185	14.1425	14.7603	14.4263
FHL2	Q14192	0.470295	0.309192	14.7253	13.9664	13.9472	14.2982	14.7271	14.5411
VDAC1	P21796	0.386924	0.308016	12.5218	13.2458	13.5853	13.2141	13.4383	13.6245
HADHB	B5MD38;C9JE81;C9JEY0;F5GZQ3;P55084;P55084-2	0.189212	0.307465	10.6473	10.81	9.00787	10.0613	10.8753	10.451
NUB1	H3BM14;H3BM74;Q9Y5A7;Q9Y5A7-2	0.166208	0.30724	10.9891	12.721	10.9391	12.4138	12.0192	11.1379
RBM22	E5RHA8;E5RJW4;Q9NW64	0.303359	0.30178	14.451	13.2791	13.7017	14.3231	14.3325	13.6817
RBMX	P38159	0.264329	0.301341	15.3095	16.586	15.1767	16.1346	15.8965	15.945
VPS28	Q9UK41	0.298631	0.300372	12.4039	13.4705	12.1354	12.9509	12.9458	13.0143
CDK5RAP1	Q96SZ6;Q96SZ6-2;Q96SZ6-3	0.47779	0.297854	12.2655	11.6572	11.3739	12.1697	11.9494	12.0711
SIAH2	O43255	0.207701	0.297572	12.0712	10.6362	11.5572	11.8139	12.2934	11.05
RPL24	C9JNW5;C9JXB8;P83731	0.638008	0.297479	16.4231	15.8818	16.093	16.1513	16.5703	16.5688
SFN	P31947;P31947-2	0.387826	0.295617	13.006	13.1556	12.8122	13.3122	12.7457	13.8027
RPL10	P27635;X1WI28	1.73002	0.294714	17.2774	17.1331	17.3686	17.51	17.6233	17.5299
NGDN	Q8NEJ9;Q8NEJ9-2	1.53455	0.291924	12.3474	12.5571	12.4749	12.6606	12.7218	12.8729
DCP1A	Q9NPI6;Q9NPI6-2	0.329336	0.291897	13.6152	12.3599	12.9772	13.2016	13.2802	13.3463
PLCD3	H0YGF8;Q8N3E9	0.283414	0.290279	13.98	13.6563	12.676	13.9049	13.476	13.8022
RPL36	Q9Y3U8	0.700023	0.289463	15.0468	14.6829	14.5485	15.1519	14.8179	15.1768
DOHH	Q9BU89	0.361947	0.287628	12.7646	13.6505	13.2705	13.9247	13.3955	13.2282
RPL39;RPL39P5	P62891;Q59GN2	0.182031	0.284762	16.9602	15.0111	16.3509	16.2007	16.6953	16.2804
SF3B2	E9PPJ0;Q13435	0.411865	0.28237	15.1516	15.6671	14.6705	15.5365	15.3907	15.4092
RPL17;RPL17-C18orf32;RPL17-C18orf32;RPL17;RPL17;RPL17;RPL17;RPL17;RPL17	A0A087WXM6;A0A0A0MRF8;A0A0A6YYL6;J3KRX5;J3QLC8;J3QQT2;P18621;P18621-2;P18621-3	0.756555	0.277286	14.2116	13.9152	13.8768	14.0316	14.3255	14.4785
OSBPL8	F8VQX7;F8VUA7;Q9BZF1;Q9BZF1-2;Q9BZF1-3	0.239859	0.276985	14.0221	12.9592	12.6713	13.4442	13.856	13.1833
SEPTIN2	C9IZU3;C9J938;C9JB25;C9JQJ4;Q15019;Q15019-2;Q15019-3	0.0772409	0.275579	11.6916	9.14777	13.3949	11.546	11.3717	12.1433
HDLBP	A0A024R4E5;Q00341;Q00341-2	0.762763	0.275084	12.6557	12.236	12.1263	12.563	12.5897	12.6905
RPL32	D3YTB1;F8W727;P62910	0.889464	0.274776	15.6832	15.5259	15.3952	15.5827	15.9759	15.8702
PFDN2	Q9UHV9	0.178437	0.272142	13.9194	15.6053	14.3595	15.464	14.684	14.5525
FAU	E9PR30;P62861	0.399626	0.271494	16.4007	15.4563	15.6937	16.0296	16.1823	16.1532
PPIL4	Q8WUA2	0.424997	0.26984	15.0949	15.5163	14.7405	15.5661	15.511	15.0842
CHORDC1	E9PIZ4;E9PPQ5;E9PSD5;Q9UHD1	0.597868	0.269396	12.1991	12.883	12.5585	12.76	12.8946	12.7942
DDX20	A0A7P0T9T8;Q9UHI6	0.283808	0.267846	13.5401	12.2808	12.616	12.9971	13.0613	13.1821
PCYT2	I3L102;I3L1L9;I3L1R7;I3L2Q1;Q99447;Q99447-3	0.14483	0.267198	8.59264	9.80453	10.1881	9.34707	10.7708	9.26897
ATXN2	A0A2R8Y5A6;A0A2R8Y7E6;A0A2R8Y7P6;A0A2R8YDM9;A0A5F9ZHH4;A0A5F9ZHW5;A0A5F9ZHX3;A0A5F9ZI57;F8VQP2;F8VRK6;F8W0B5;F8WB06;H0YH87;Q99700;Q99700-2;Q99700-4;Q99700-5;V9GY86	0.15233	0.266816	10.5971	11.2588	11.8896	11.512	10.5868	12.4472
ACTR1A	P61163;R4GMT0	0.416279	0.266457	11.2054	11.2457	11.5382	11.6454	12.0051	11.1382
RACK1	P63244	0.630319	0.265289	15.3006	15.8143	15.6186	15.8079	16.0598	15.6616
MRTO4	Q9UKD2	0.0740501	0.262016	9.47188	12.0641	9.62542	11.9436	8.88094	11.1229
GLRX5	Q86SX6	0.219553	0.261779	13.7859	14.499	13.1249	14.5108	14.0036	13.6807
PARK7	Q99497	0.753741	0.261516	19.5594	19.6101	19.1615	19.806	19.7458	19.5638
KRT16	P08779	0.10969	0.260447	20.6661	21.0584	22.5529	22.3308	20.4102	22.3178
DALRD3	C9JA38;Q5D0E6;Q5D0E6-2;Q5D0E6-3	0.354257	0.259105	11.0184	11.4129	10.5749	11.2837	10.9313	11.5685
PDIA6	Q15084;Q15084-2;Q15084-3;Q15084-4;Q15084-5	0.641726	0.256786	18.14	17.5776	17.8388	18.1106	18.2446	17.9715
SRRM2	Q9UQ35	0.68734	0.256512	16.2518	15.8983	15.672	16.2325	16.193	16.1661
H4-16	P62805	0.533799	0.255521	19.0399	19.2519	18.5618	19.1906	19.1231	19.3064
PEPD	A0A494C165;A0A494C194;K7ES25;P12955;P12955-2;P12955-3;V9GYE4	0.28226	0.255424	14.1615	13.0421	13.9249	13.7105	14.1361	14.0482
EHMT2	A0A0G2JIS2;Q96KQ7;Q96KQ7-2;Q96KQ7-3	0.156375	0.255315	14.0454	11.9749	13.0924	13.2544	13.098	13.5263
EDC4	Q6P2E9	1.72183	0.253279	13.7541	13.6689	13.8887	14.052	13.9899	14.0296
KRTAP2-3;KRTAP2-4	P0C7H8;Q9BYR9	0.0155369	0.251663	22.6875	12.1206	10.3072	15.9729	8.51389	21.3835
CCT7	Q99832	0.692302	0.251577	18.2113	17.9025	17.7338	18.0854	18.3748	18.1422
ELP1	A0A6Q8PEX6;A0A6Q8PF66;A0A6Q8PFB7;A0A6Q8PFH9;A0A6Q8PG86;A0A6Q8PGW3;A0A6Q8PHC9;A0A6Q8PHF4;F5H2T0;O95163	0.144784	0.251093	11.7586	13.4623	12.1283	13.3784	12.6731	12.0509
SRRM1	A9Z1X7;Q8IYB3;Q8IYB3-2	0.551516	0.250056	14.8133	14.9163	14.2853	15.0115	14.8609	14.8927
MRPS7	J3KSI8;J3QKW2;J3QLS3;J3QQS1;Q9Y2R9	0.221374	0.245001	11.0857	12.1228	12.4191	12.4227	11.9904	11.9496
ILKAP	Q9H0C8	0.418687	0.242855	13.6453	13.2891	12.8139	13.5857	13.3942	13.497
FLII	Q13045;Q13045-2	0.512234	0.241947	12.3301	12.2825	12.759	12.5323	12.5854	12.9797
PIP	P12273	0.164749	0.240939	14.222	14.6339	13.5839	14.8707	13.4716	14.8203
PLS3	P13797;P13797-3	0.467844	0.240844	15.1096	15.691	15.651	15.4842	15.8545	15.8353
RPL19	A0A7I2YQG2;J3KTE4;J3QR09;P84098	0.586099	0.240421	16.6968	16.5993	16.3615	16.4866	16.9655	16.9268
RPLP2	P05387	0.30628	0.238461	16.4613	16.887	16.1848	17.109	16.8522	16.2873
TRMT10C	C9JVB6;Q7L0Y3	0.339691	0.238215	11.337	11.4145	11.0315	11.8027	10.9706	11.7244
C11orf54;;C11orf54;C11orf54;C11orf54;C11orf54	A0A087WT99;A0A1W2PRB8;E9PQS1;Q9H0W9;Q9H0W9-2;Q9H0W9-3	0.110889	0.237222	12.9247	10.9178	12.5213	13.2988	11.7914	11.9853
LANCL3	Q6ZV70	0.566325	0.236275	13.7998	13.7826	13.2415	13.79	13.8799	13.8629
RAB14	P61106	0.912418	0.236151	14.2932	14.6252	14.2943	14.7193	14.6509	14.5509
RPS18	P62269	0.515948	0.236008	17.6886	17.0425	17.355	17.4513	17.6538	17.689
NCBP2	P52298	0.181715	0.235316	11.5216	13.1209	12.242	12.324	12.3967	12.8697
RAD54B	Q9Y620	0.39545	0.232088	12.1331	11.6293	11.6414	12.3806	11.9668	11.7527
SF3B5	Q9BWJ5	0.507041	0.229543	13.3222	13.0656	12.7408	13.1218	13.4738	13.2216
HNRNPM	A0A087X0X3;P52272;P52272-2	0.616422	0.228427	18.0748	17.6711	17.6776	17.8425	18.1716	18.0947
RPL13	P26373	0.308334	0.225627	16.6968	16.7694	15.8601	16.5427	16.7221	16.7384
MKI67	P46013;P46013-2	0.696635	0.224254	13.814	14.0242	13.7163	13.9467	14.3056	13.975
EBNA1BP2	H7C2Q8;Q99848	0.0912407	0.224075	9.712	11.4007	9.03979	10.6306	10.947	9.24713
TXNL1	O43396	0.909494	0.222862	18.7723	18.4904	18.413	18.7361	18.8483	18.7599
CCT5	P48643	0.61695	0.222755	17.7373	17.3293	17.2706	17.5928	17.8064	17.6064
IK	Q13123	0.0366949	0.221761	8.58674	14.2644	9.66071	11.3712	9.05638	12.7496
RBM8A	Q9Y5S9	0.492203	0.220661	13.6774	13.7218	13.5786	14.2573	13.7399	13.6425
CCT6A	P40227	0.310535	0.220267	17.8463	17.0108	17.116	17.3254	17.7456	17.5628
TNFAIP8L1	Q8WVP5	0.173014	0.218165	12.075	11.3549	10.4306	11.4836	11.4527	11.5787
EXOSC4	Q9NPD3	0.223112	0.218123	13.2134	14.0383	13.2986	13.6165	14.2639	13.3243
PRPF4	O43172;O43172-2	0.18373	0.216641	10.1671	11.2208	10.1092	10.7916	11.1363	10.2191
KRT86	O43790	0.0199218	0.215688	26.7733	20.7867	18.8931	23.123	17.3362	26.641
CCT3	P49368	0.389039	0.215641	18.5809	17.9529	17.9173	18.2048	18.5169	18.3763
DDX17	A0A1X7SBZ2;A0A5H1ZRQ2;Q92841	0.604774	0.214053	14.5307	14.978	14.5424	14.9651	14.7801	14.9481
PXN	A0A1B0GTU4;F5GZ78;P49023;P49023-2;P49023-3;P49023-4	0.450687	0.213477	12.3536	13.0198	12.719	12.7773	12.9828	12.9728
ERP44	Q9BS26	1.90267	0.211782	15.3022	15.3131	15.183	15.4272	15.513	15.4934
TCP1	P17987	0.557258	0.211027	18.5919	18.3202	18.1076	18.4316	18.7329	18.4882
LRRC40	Q9H9A6	0.429683	0.210897	14.6429	14.2936	14.7877	14.5666	15.073	14.7172
SHCBP1	Q8NEM2	0.152557	0.210793	9.60595	9.99615	10.5806	10.718	10.6877	9.40931
ACIN1	S4R3H4	0.298133	0.210119	13.8535	14.6307	13.7613	14.3632	14.1396	14.373
CIAPIN1	Q6FI81;Q6FI81-3	0.517831	0.209945	13.8667	14.2712	14.0892	14.3613	14.4707	14.0249
PSME3IP1	H3BMX9;H3BP64;H3BQQ6;H3BSY6;H3BTI2;H3BTP8;H3BU93;H3BUL4;Q9GZU8	0.083895	0.207202	10.4766	10.7333	8.31324	10.8792	9.5374	9.7282
KLHL18	O94889;O94889-2	0.232753	0.207049	11.6867	10.778	10.6175	11.1697	11.4406	11.0931
;RPS17	H3BNC9;P08708	0.43859	0.206356	15.3533	14.7748	14.9253	15.0975	15.146	15.429
SUPT16H	Q9Y5B9	1.09213	0.205625	13.1321	13.3108	13.1969	13.3617	13.334	13.5609
USP9X	Q93008;Q93008-3	0.31621	0.204562	13.863	13.2492	13.9749	13.971	14.097	13.6328
HSPA2	P54652	0.06109	0.204309	10.2813	9.90441	12.1031	12.1549	9.10919	11.6376
RPS2	P15880	1.2868	0.204149	16.8924	16.9515	16.7615	17.0003	17.1655	17.0519
U2SURP	E7ET15;O15042;O15042-2	0.191727	0.204124	13.4199	13.8739	12.4994	13.5707	13.3854	13.4494
SEC24A	O95486	0.282281	0.204016	12.4871	12.9898	12.2302	13.0316	12.8779	12.4096
PRKAA2;PRKAA2;PRKAA1;PRKAA1;PRKAA1	A0A087WXX9;P54646;Q13131;Q13131-2;Q96E92	0.112925	0.203468	9.95281	9.62984	10.8786	10.9271	10.8578	9.28683
RIOX2	D6RCB6;Q8IUF8;Q8IUF8-2;Q8IUF8-4	0.0824093	0.19943	11.4016	13.5653	12.4457	13.5231	11.5507	12.9371
PDCD6IP	Q8WUM4	0.420099	0.198707	13.451	14.0572	13.5617	13.9761	13.7355	13.9545
TBC1D15	C9JA93;Q8TC07-2;Q8TC07-3	0.303652	0.198655	12.7002	12.49	12.4806	12.3455	13.2272	12.694
PPA2	D6R967;H0Y9D8;Q9H2U2;Q9H2U2-2;Q9H2U2-3;Q9H2U2-6	0.0835522	0.19792	7.73597	9.50033	6.96086	8.35068	7.58011	8.86013
DHX38	Q92620	0.106746	0.197056	9.76025	10.9475	9.06683	9.8976	9.61045	10.8577
HSPA1B;HSPA1A;HSPA1B	A0A0G2JIW1;P0DMV8;P0DMV9	1.86622	0.1968	18.027	18.0941	17.9402	18.2363	18.1894	18.226
;MAP2K2;MAP2K1;MAP2K2;MAP2K1;MAP2K1	A0A1B0GUL7;G5E9C7;H3BRW9;P36507;Q02750;Q02750-2	0.285433	0.195847	11.3438	10.6692	11.5093	11.5118	11.4284	11.1697
TBC1D4	O60343;O60343-2;O60343-3	0.701924	0.19538	13.4057	12.976	13.2506	13.4127	13.4341	13.3716
METTL2B	Q6P1Q9	0.50202	0.19487	14.0824	14.057	13.8663	13.9038	14.4329	14.2536
DIS3	F2Z2C0;Q9Y2L1	0.243933	0.194484	13.0832	12.5735	13.0628	12.7363	13.6216	12.9451
HUWE1	Q7Z6Z7;Q7Z6Z7-2;Q7Z6Z7-3	0.215233	0.193591	12.5878	11.4735	11.859	11.9484	12.174	12.3786
RPS9	P46781	1.04953	0.193128	17.6076	17.4305	17.3304	17.6079	17.7079	17.6319
IPO11	F8WDV0;Q9UI26;Q9UI26-2	0.101116	0.192246	10.5345	12.5001	12.3754	12.1604	12.3224	11.504
RPL18	J3QQ67;Q07020	0.58085	0.191719	17.2657	16.9673	16.8073	17.0892	17.2903	17.2359
CCT2	P78371	0.723691	0.190139	18.3767	18.276	18.0204	18.3443	18.5266	18.3726
RPL13A	P40429	0.735433	0.189817	17.5454	17.3168	17.3111	17.402	17.6818	17.6589
SF3B3	Q15393	0.419993	0.189766	15.9289	16.236	15.5754	16.077	16.0783	16.1543
RTN4	F8W914;Q9NQC3-2	0.082516	0.187686	10.436	12.1126	12.0855	12.0203	10.6103	12.5666
ADGRA3	Q8IWK6;Q8IWK6-2	0.329968	0.186869	19.0523	18.2673	18.6394	18.7975	18.948	18.7741
ABI1	A0A0A0MRT6;B6VEX4;Q8IZP0;Q8IZP0-10;Q8IZP0-11;Q8IZP0-12;Q8IZP0-2;Q8IZP0-3;Q8IZP0-4;Q8IZP0-5;Q8IZP0-6;Q8IZP0-7;Q8IZP0-8;Q8IZP0-9	0.198836	0.186579	14.6162	13.4257	13.9773	14.1238	14.4084	14.0467
NEDD1	Q8NHV4;Q8NHV4-3	0.133708	0.184882	13.0249	11.7509	11.3341	12.1746	12.2741	12.2159
RPL12	P30050	0.365056	0.184871	17.6781	17.5853	17.0523	17.5307	17.7869	17.5527
QRICH1	Q2TAL8	0.199613	0.184731	12.0302	11.2178	10.8787	11.6703	11.6527	11.358
TRMT6	Q9UJA5;Q9UJA5-2;Q9UJA5-3	0.979172	0.184671	12.6643	12.6492	12.4374	12.6864	12.7611	12.8573
RPS8	P62241	0.51047	0.184297	16.8317	17.3007	16.8387	17.1429	17.236	17.1451
NSUN2	Q08J23;Q08J23-2	0.185959	0.183159	14.0236	13.0672	13.506	14.0335	13.9015	13.2112
ADAR	A0A7P0Z4F9;P55265;P55265-4;P55265-5	1.69149	0.182872	15.9713	15.8756	15.8307	16.0352	16.1248	16.0663
HDAC2	Q92769;Q92769-3	0.834682	0.180621	15.8922	15.8271	15.6183	15.8645	16.0616	15.9533
USP15	Q9Y4E8;Q9Y4E8-2;Q9Y4E8-3	0.360401	0.179957	14.0392	13.3843	13.5105	13.8774	13.7135	13.883
CCT8	P50990	0.488545	0.1789	19.0456	18.681	18.5806	18.8655	19.0955	18.883
MACROH2A1	O75367;O75367-2;O75367-3	0.409925	0.17711	14.4984	14.2219	13.8977	14.3345	14.3134	14.5015
H3-3B;H3C12;H3-3B;H3-4;H3C13	K7EK07;P68431;P84243;Q16695;Q71DI3	0.173979	0.176623	18.6532	17.5208	17.9477	17.8271	18.4634	18.361
ATE1	F5GXE4;O95260-2	0.200986	0.176596	12.5736	13.5313	13.243	13.6104	13.2972	12.97
WRNIP1	Q96S55;Q96S55-2	0.122157	0.175627	10.1732	10.9526	9.28947	9.89023	10.5292	10.5227
CHKA	P35790;P35790-2	0.150238	0.175099	13.9661	12.8317	13.2562	14.0782	13.3481	13.153
CIBAR1;CIBAR1;FAM92A;FAM92A;FAM92A;FAM92A;FAM92A;CIBAR1;CIBAR1;CIBAR1;CIBAR1	A0A087WTS3;A0A0B4J212;A1XBS5;A1XBS5-2;A1XBS5-3;A1XBS5-4;A1XBS5-5;E5RGD0;E5RHK0;F8W7P5;H0YC32	0.670435	0.172934	13.1861	13.2795	13.135	13.1556	13.4969	13.4669
PAPSS1	O43252	0.610199	0.172382	13.9384	13.6987	13.765	14.1814	13.8862	13.8516
HNRNPH1	G8JLB6;P31943	0.872994	0.172357	17.745	17.9895	17.8568	17.955	18.1503	18.0031
GDA	Q9Y2T3;Q9Y2T3-3	0.697998	0.172318	15.2382	14.8536	15.0592	15.2535	15.2228	15.1918
SEC61B	P60468	1.10453	0.171768	13.7392	13.5607	13.7574	13.9324	13.8152	13.825
RABL6	F2Z2T0;G3V154;Q3YEC7;Q3YEC7-2;Q3YEC7-3	0.124554	0.170872	10.2356	11.7401	11.4609	11.4812	11.5422	10.9258
PALS2	B8ZZG1;Q9NZW5	0.63553	0.169637	14.0764	13.9685	14.3297	14.1939	14.3064	14.3833
UBAP2	Q5T6F2	0.269571	0.167734	13.4626	13.9826	13.2145	13.9086	13.5493	13.7049
IDH3B	A0A087WZN1;O43837	0.712706	0.16699	15.9445	15.7276	15.6719	16.0765	15.9203	15.8482
USP5	P45974;P45974-2	0.336378	0.165874	15.1556	15.7492	15.1421	15.5104	15.4528	15.5813
ATP6V1H	G3V126;Q9UI12;Q9UI12-2	0.14703	0.16584	8.93217	9.78868	9.71886	9.02241	10.0594	9.85542
TTLL12	Q14166	2.21342	0.165661	15.784	15.8391	15.843	16.0366	15.9559	15.9705
DARS1	P14868;P14868-2	0.550172	0.165405	14.6778	14.7177	14.7054	14.6535	15.1094	14.8343
AURKA	O14965	0.904027	0.165048	14.0022	13.7928	13.9175	13.9588	14.1635	14.0853
RPS16	P62249	0.322593	0.164633	17.546	17.0141	16.9228	17.1756	17.3625	17.4386
EZR	E7EQR4;P15311	0.642728	0.164025	14.9211	15.0127	15.1025	15.0556	15.0925	15.3803
CLUH	A0A494C0R8;K7EIG1;O75153	0.374691	0.163676	14.4561	14.0437	13.8413	14.3059	14.306	14.2203
KIF5B	P33176	0.387567	0.160242	11.5107	11.5195	12.0098	11.9301	11.7372	11.8534
SMC1A	A0A6Q8PHC3;G8JLG1;Q14683	0.280461	0.160181	12.2582	12.2454	11.9515	12.431	12.5955	11.9092
SNRPE	P62304	0.560105	0.160027	17.2706	17.0854	16.9875	17.1823	17.4661	17.1752
RPL37A	C9J4Z3;P61513	0.165538	0.159977	15.1784	14.8155	14.2924	14.6044	14.7294	15.4324
CHERP	J3QK89;Q8IWX8	0.115369	0.159812	11.977	12.8745	11.3962	12.7573	11.9058	12.0639
DNMT1	A0A7I2V490;A0A7I2V5D0;A0A7I2V5F1;A0A7I2YQA8;A0A7I2YQQ0;P26358;P26358-2	0.244177	0.158847	13.4037	14.1649	13.9377	14.2221	13.7999	13.9609
MGMT	B4DEE8;P16455	0.0441179	0.157631	9.89777	12.555	10.1264	12.099	9.28628	11.6667
PGAM5	Q96HS1;Q96HS1-2	0.321721	0.157548	14.9416	14.5325	14.5679	14.5352	15.0184	14.9611
ABHD10	Q9NUJ1;Q9NUJ1-2;Q9NUJ1-3	0.0557661	0.157186	10.052	11.7589	8.60591	10.5697	10.7008	9.61794
ZNF598	H3BPG6;H3BQQ2;Q86UK7;Q86UK7-2;Q86UK7-3	0.0526215	0.15701	9.28031	10.8491	10.6505	8.66724	11.6633	10.9204
PRPF38B	Q5VTL8	0.280232	0.155449	14.5167	13.9375	14.0085	14.0569	14.4783	14.3938
GIGYF2	C9J0V6;C9JHT0;C9JHW1;C9JPV7;C9JRZ2;C9JW88;C9JXQ0;E7ESB6;F8WCD5;I1E4Y6;Q6Y7W6;Q6Y7W6-3;Q6Y7W6-4;Q6Y7W6-5	0.0976261	0.154841	10.1921	11.3368	12.0325	10.9686	11.5332	11.5242
DNAJA1	P31689	0.336008	0.154625	14.7184	14.1018	14.5157	14.4911	14.6299	14.6787
PFDN5	H3BPF6;Q99471	0.0295106	0.153923	9.17049	13.64	9.17614	12.2837	9.09813	11.0666
ALKBH4	Q9NXW9	0.222533	0.1507	16.5439	15.6731	16.0375	16.2118	16.3812	16.1136
GATD3B;;GATD3B;GATD3B;GATD3;GATD3	A0A096LNH5;A0A096LPI6;A0A0B4J2D5;A0A0B4J2D5-2;P0DPI2;P0DPI2-2	0.172119	0.150587	12.5499	12.565	11.6582	12.5323	12.5645	12.1281
ARAF	P10398	0.274876	0.146767	12.1628	11.9725	11.5884	11.7954	12.2259	12.1427
EFTUD2	Q15029;Q15029-2	0.749277	0.146589	18.272	18.23	17.985	18.3118	18.294	18.321
VDAC2	A0A0A0MR02;P45880;P45880-1;P45880-2	0.327253	0.146014	13.8483	13.5237	14.0359	13.8393	14.1611	13.8455
USP48	Q86UV5;Q86UV5-2;Q86UV5-3;Q86UV5-4;Q86UV5-7;Q86UV5-8	0.10807	0.145298	10.4929	10.7219	10.0128	10.7068	11.2262	9.73052
RPL23	P62829	0.29685	0.142496	16.9941	16.4102	16.534	16.6561	16.7778	16.9318
PPP2R2A	P63151	1.12658	0.141383	15.6981	15.6628	15.5092	15.7863	15.7494	15.7586
RAB5C	P51148;P51148-2	0.176932	0.140552	12.7072	13.6393	13.1732	13.5209	13.3632	13.0573
USP7	A0A669KBL1;H3BND8;Q93009;Q93009-3	0.134701	0.140243	12.0922	12.0901	11.3015	11.4166	12.3212	12.1668
MRPS5	P82675	0.0833277	0.1391	12.0527	10.685	12.5655	11.5547	12.1782	11.9876
CORO1C	B4E3S0;Q9ULV4;Q9ULV4-2;Q9ULV4-3	0.337768	0.138164	13.451	13.2357	13.7028	13.5666	13.7921	13.4452
BDH1	Q02338	0.0701854	0.137405	12.0774	11.4104	13.382	12.1063	13.1572	12.0186
RPL31	B7Z4C8;B7Z4E3;C9JU56;H7C2W9;P62899;P62899-2;P62899-3	0.638332	0.133598	17.0852	17.2151	16.9516	17.1078	17.291	17.2539
NCKAP1	Q9Y2A7;Q9Y2A7-2	0.27134	0.132275	15.3267	14.6856	14.8646	15.0935	15.1607	15.0195
UQCRC2	H3BRG4;P22695	0.142211	0.129909	10.67	10.5784	11.0634	11.1351	10.2971	11.2693
YWHAZ	P63104	0.226815	0.127941	15.2868	15.6535	15.0572	15.3433	15.3061	15.732
FABP5	Q01469	0.0485767	0.127774	15.2524	15.8886	17.3629	16.9099	14.9963	16.9809
PUF60	A0A0J9YVP6;A0A0J9YXJ8;A0A0J9YXX5;A0A0J9YYL3;Q9UHX1;Q9UHX1-2;Q9UHX1-3;Q9UHX1-4;Q9UHX1-5;Q9UHX1-6	0.165242	0.127548	15.5286	15.6841	14.7515	15.4489	15.3864	15.5115
CYFIP1	Q7L576	0.373132	0.126216	16.7442	16.4608	16.3819	16.5081	16.8167	16.6407
MRPS28	E5RFH3;E5RGC7;H0YAT2;Q9Y2Q9	0.0483339	0.125852	9.25761	11.8922	11.0442	11.7178	10.2674	10.5865
IQGAP1	P46940	0.314843	0.125267	13.9153	14.3136	14.1407	14.2607	14.0438	14.4409
BRAT1	Q6PJG6	0.309463	0.125245	13.4274	13.7858	13.5787	13.942	13.7282	13.4975
U2AF1	Q01081	0.221224	0.124068	16.5047	16.8841	16.1437	16.6636	16.6969	16.5443
PPP2R1A	P30153	0.68228	0.123842	16.0787	15.8025	15.9861	16.1088	16.0588	16.0712
EIF3A	Q14152	0.339053	0.122963	14.6708	15.1278	14.9926	15.1745	14.9573	15.0283
RBM39	Q14498;Q14498-2;Q14498-3	0.183779	0.12269	16.2756	16.5754	15.7167	16.3332	16.3651	16.2375
SERPINB9	P50453	0.314584	0.122	14.39	14.5439	14.0886	14.3172	14.6124	14.4589
KRT6A	P02538	0.0453597	0.121819	20.0023	19.9696	21.6371	21.3799	19.1892	21.4053
NUDT16L1	Q9BRJ7	0.896387	0.121616	17.482	17.4117	17.3348	17.4862	17.6248	17.4823
CCT4	P50991	0.208369	0.121384	18.7918	18.4086	18.1623	18.4021	18.8337	18.4911
CNN2	B4DDF4;B4DUT8;Q99439	0.345364	0.120022	17.2912	16.9208	16.8975	17.0718	17.2886	17.1092
PSME3	P61289;P61289-2;P61289-3	0.310081	0.119728	14.6299	14.1887	14.6094	14.4724	14.6904	14.6244
HDAC10	C9J8B8;Q969S8;Q969S8-2	0.233644	0.11746	18.2152	17.6349	17.7043	17.8425	18.0995	17.9648
SEC24C	G5EA31;P53992	0.460924	0.11684	13.6387	13.3378	13.3611	13.4617	13.5961	13.6303
SNRPGP15;SNRPG;SNRPG;SNRPG	A8MWD9;F5H013;P62308;Q49AN9	0.306776	0.115904	18.3588	17.9319	17.9118	18.1394	18.2825	18.1283
HSD17B4	A0A2R8YD50;A0A804HK65;A0A804HKU2;E7EPL9;P51659;P51659-2;P51659-3	0.0657802	0.115123	12.1628	13.8045	13.3103	13.6459	12.4766	13.5005
FTO	A0A1B0GTC3;A0A1B0GTC5;A0A1B0GU26;A0A1B0GUC3;A0A1B0GV98;A0A1B0GVH5;Q9C0B1	0.181424	0.115105	12.3698	13.1539	12.9105	13.032	12.7989	12.9486
DHX15	O43143	0.506189	0.114911	16.5539	16.6509	16.3532	16.6005	16.7266	16.5755
LANCL1	O43813	0.304703	0.112813	17.3043	17.4396	16.9356	17.3449	17.3463	17.3268
CAPZA1	P52907	0.155148	0.112765	17.7061	16.8644	17.3476	17.2451	17.6496	17.3616
STAT1	A0A669KB52;A0A669KB53;A0A669KB56;A0A669KB68;A0A669KB75;A0A669KBA4;A0A669KBI6;J3KPM9;P42224;P42224-2	0.472855	0.111604	13.8119	13.886	13.8622	14.0148	14.1078	13.7725
RPL14	E7EPB3;P50914	0.249507	0.110664	17.9037	17.4865	17.5969	17.5546	17.9828	17.7817
RPL6	Q02878	0.210421	0.109932	18.0649	17.7436	17.6139	17.6401	18.1629	17.9492
HLA-C	A0A140T921;A0A140T9H5;A0A140T9U8;A2AEA2;O19617;P10321;P10321-2	0.112506	0.109218	13.6733	14.0501	13.407	13.6634	14.3961	13.3984
LMNB2	Q03252	0.171012	0.10888	13.4129	12.825	13.2874	12.9644	13.4066	13.4809
RPS7	P62081	0.184097	0.107963	16.4295	16.8709	16.2432	16.375	16.7345	16.7581
EIF3M	E9PRY0;H0YCQ8;J3KNJ2;Q7L2H7;Q7L2H7-2	0.0558613	0.106606	9.46996	10.5234	10.7385	11.4097	9.82059	9.82137
SNRNP40	Q96DI7;Q96DI7-2	0.0839615	0.103679	13.6089	13.0465	12.2345	12.7348	13.3486	13.1174
SLPI	P03973	0.0824808	0.102486	10.9455	11.5357	12.0314	11.5411	11.11	12.1691
DHX36	Q9H2U1;Q9H2U1-2;Q9H2U1-3	0.101319	0.101421	11.9661	13.1514	12.3933	12.7856	12.4581	12.5714
HNRNPL	A0A3B3ITJ4	0.0766227	0.101039	14.0793	15.1408	14.6421	15.3279	14.1217	14.7157
PTGES3	A0A087WYT3;Q15185;Q15185-4	0.302845	0.100679	17.5588	17.2658	17.2411	17.3243	17.6248	17.4186
CSTB	P04080	0.0309497	0.100286	14.8489	16.1704	13.9013	14.2748	14.1328	16.8138
TOE1	Q96GM8;Q96GM8-2	0.122782	0.0993617	13.0328	13.2244	13.4646	13.2359	13.8474	12.9366
CDKN2AIPNL	Q96HQ2;Q96HQ2-2	0.23589	0.0991379	14.034	13.7055	13.4666	13.8615	13.8363	13.8057
RABGGTB	P53611	0.0355095	0.0988022	12.6245	14.9263	12.2387	14.1174	13.3314	12.6371
JMJD6	B2WTI3;B2WTI4;K7EJU9;Q6NYC1;Q6NYC1-2;Q6NYC1-3	0.0284624	0.0979153	10.3737	13.3375	11.1054	13.1655	11.1195	10.8253
RPP14	O95059	0.169592	0.0978982	12.4367	11.9901	12.7149	12.5809	12.3947	12.4598
PELO	Q9BRX2	0.154744	0.0978613	13.4244	14.1208	13.7328	13.6241	14.0463	13.9012
NEDD4L	A0A1B0GVY1;A0A6Q8PFI7;A0A6Q8PGP5;A0A6Q8PHJ5;A0A7P0Z498;Q96PU5;Q96PU5-2;Q96PU5-4;Q96PU5-5;Q96PU5-6;Q96PU5-7;Q96PU5-9	0.0746169	0.0970612	12.604	13.9705	12.7206	13.388	13.2555	12.9427
DKC1	O60832;O60832-2	0.0428706	0.0959816	10.4655	12.5239	12.2625	11.2975	11.6054	12.6369
QTRT2	Q9H974;Q9H974-2;Q9H974-3;Q9H974-4	0.108561	0.0949663	13.7416	12.9025	12.8793	13.2201	13.5319	13.0563
WASF2	Q9Y6W5	0.241929	0.0948229	14.1323	14.1413	13.8978	14.2276	14.3341	13.8941
H1-2	P16403	1.05334	0.0943578	14.7362	14.7534	14.8193	14.8201	14.9301	14.8418
RPS27A	P62979	0.113581	0.0942866	16.3543	15.6453	16.3128	15.8147	16.448	16.3325
SPTLC2	O15270	0.169361	0.0941827	13.4226	12.868	13.0224	12.9551	13.2429	13.3976
RIN1	E9PNR2;Q13671;Q13671-2	0.239771	0.0938168	13.8467	13.7727	13.8094	13.6466	14.175	13.8886
XPO5	Q9HAV4	0.255062	0.0934029	11.9339	11.8978	11.6384	12.0821	11.7037	11.9645
RPS11	P62280	0.243349	0.0932223	16.5667	16.289	16.1589	16.252	16.5544	16.4878
USP24	Q9UPU5	0.0655728	0.0916147	12.8836	11.3866	12.4077	12.2997	12.6807	11.9724
GNB1L	Q9BYB4	0.271444	0.0895624	16.0078	15.6486	15.626	15.8091	15.9436	15.7984
MT2A;MT1E;MT1G;MT1G;MT1X;MT1M	P02795;P04732;P13640;P13640-2;P80297;Q8N339	0.0567225	0.0894747	15.0061	13.6104	14.9818	14.3269	15.2029	14.337
CMBL	Q96DG6	0.232184	0.0885744	15.2377	15.1045	15.0214	15.4038	15.2774	14.9482
ARL6IP4	A0A0C4DG62;F8WCT1;Q66PJ3;Q66PJ3-2;Q66PJ3-3;Q66PJ3-7	0.0798674	0.0885728	14.4499	15.4804	14.3221	15.0716	14.5987	14.8478
DNAJC19	F2Z3A7;G5E9V2;Q96DA6	0.0502412	0.0874583	12.3307	13.2874	12.0422	13.519	11.9395	12.4642
TXNDC5	Q8NBS9	0.353	0.0866089	18.8195	18.5882	18.6542	18.7403	18.9178	18.6636
ACYP2	P14621	0.125637	0.0862811	15.1489	14.3304	14.7428	14.7314	14.9986	14.751
TTK	P33981;P33981-2	0.100549	0.0840664	14.4205	13.6769	13.98	14.08	14.4851	13.7645
CCNH	A0A2R8YEM2;D6RG18;D6RHI7;P51946	0.0328568	0.0833985	12.1209	11.0781	9.44749	11.6811	10.6574	10.5582
HNRNPR	O43390;O43390-2	0.217442	0.0820875	14.2641	14.7549	14.4649	14.5752	14.6396	14.5152
PDCD2L	Q9BRP1	0.24132	0.081583	16.6649	16.257	16.3856	16.4175	16.6159	16.5189
GSTP1	A8MX94;P09211	0.101908	0.0810118	13.5344	13.5298	14.3251	13.6765	13.9071	14.0488
ADRM1	Q16186	0.100836	0.0798353	15.548	14.5857	15.0885	15.0347	15.1978	15.2292
PBDC1	Q9BVG4	0.0393034	0.0791782	13.3446	15.0071	13.4858	13.7532	13.4537	14.8682
GSPT1	P15170-2;P15170-3	0.135468	0.0779819	15.0398	14.4049	14.7312	14.6218	14.7954	14.9928
DPH2	E9PLL2;E9PMH7;Q9BQC3;Q9BQC3-2	0.120878	0.0775267	10.7226	11.299	10.8504	11.3208	10.7854	10.9984
KIF2C	Q99661;Q99661-2	0.204887	0.0765667	15.3269	14.9946	15.0159	15.0518	15.3751	15.1401
STAT3	A0A7I2V2G1;A0A7I2V2T1;A0A7I2V395;A0A7I2V3V0;A0A7I2V444;A0A7I2V4C8;A0A7I2V4F6;A0A7I2V4R2;A0A7I2V4R3;A0A7I2V552;A0A7I2V5N9;A0A7I2YQD2;A0A7I2YQI1;A0A7I2YQR5;P40763;P40763-2;P40763-3	0.0900442	0.0765289	12.1707	12.8805	12.1308	12.775	12.4828	12.1538
PFAS	O15067	0.131183	0.0761312	15.3575	14.775	14.9293	14.8933	15.3188	15.0781
EEF1A2	A0A2U3TZH3;Q05639	0.125056	0.0755456	18.0077	17.3253	17.3794	17.5942	17.6448	17.7001
SNRNP200	O75643	0.286008	0.0744282	15.0634	14.9738	14.8099	14.9396	15.1716	14.9591
ISYNA1	Q9NPH2	0.150238	0.0724351	16.5617	15.9921	16.297	16.2423	16.4903	16.3355
MRPS35	P82673	0.0710405	0.0718098	12.1712	11.4421	11.8676	11.3412	12.0862	12.269
GAR1	Q9NY12;Q9NY12-2	0.0179971	0.0693852	11.5317	14.284	11.1087	13.7772	10.9832	12.3721
C8orf33	A0A3B3IT54;Q9H7E9;Q9H7E9-2	0.0859518	0.0682615	14.0368	14.4296	13.5341	14.2005	13.8493	14.1556
TRA2B	P62995	0.0459626	0.0679461	16.0963	17.4366	15.8525	16.7582	16.4209	16.4102
RPS12	P25398	0.198946	0.0674257	15.8169	16.1093	16.1677	16.2417	16.047	16.0076
TXNDC12	O95881	0.0878653	0.066206	16.4029	17.0233	16.3549	16.9331	16.6646	16.382
RPL35	F2Z388;P42766	0.0809253	0.0657845	15.7981	15.3119	14.886	15.1708	15.5286	15.4939
PFDN1	E5RGS4;O60925	0.284843	0.0646076	14.7262	14.6221	14.4598	14.5779	14.745	14.6791
TBCC	Q15814	0.0140234	0.0638844	10.1856	14.5989	10.0217	11.8213	11.8244	11.3521
RAB1A;RAB1A;RAB1B	E7END7;P62820;Q9H0U4	0.0728732	0.0622279	12.4048	12.6922	13.2939	12.7956	12.6459	13.1361
SRPK1	H3BLV9;Q96SB4;Q96SB4-3;Q96SB4-4	0.0399725	0.0621417	11.8806	13.1391	11.9499	12.256	13.02	11.8799
NPEPPS	A0A7I2V389;A0A7I2V3W8;E9PLK3;P55786;P55786-2	0.0530671	0.0618763	12.9445	13.8556	13.7908	13.9189	13.0479	13.8097
SMC3	Q9UQE7	0.0261279	0.0605243	11.7094	11.4836	9.28454	10.8741	11.0112	10.7738
RPL18A	M0R117;M0R1A7;M0R3D6;Q02543	0.0887584	0.0603333	16.5479	16.8368	16.2414	16.2934	16.8792	16.6345
DUSP5	Q16690	0.0388341	0.0599187	10.7396	10.2273	10.1979	10.4711	9.58213	11.2914
PHB	P35232	0.0840842	0.059749	15.7941	15.9245	16.5706	16.0137	16.1845	16.2702
OCIAD2	Q56VL3	0.0307865	0.0591122	11.0875	12.3866	12.4449	11.135	12.73	12.2313
H2BC12;H2BS1;H2BC5;H2BC10;H2BC18;H2BC18;H2BC9;H2BC15;H2BC14;H2BC13;H2BC15	O60814;P57053;P58876;P62807;Q5QNW6;Q5QNW6-2;Q93079;Q99877;Q99879;Q99880;U3KQK0	0.148566	0.0568066	18.8049	18.4522	18.331	18.5992	18.5702	18.589
PSMD14	O00487	0.0196743	0.055776	11.4415	10.6784	12.3623	11.9565	9.99106	12.702
TRIM25	Q14258	0.0947224	0.0554918	16.341	16.8578	16.1773	16.5972	16.461	16.4845
EEF1D	A0A087X1X7;E9PI39;E9PIZ1;E9PK01;E9PL12;E9PL71;E9PMW7;E9PN91;E9PPR1;E9PQ49;E9PRY8;H0YCK7;P29692;P29692-2;P29692-3	0.0239613	0.0552753	13.5308	11.4104	13.5302	12.2803	13.0428	13.3141
HNRNPC	B2R5W2;B4DY08;G3V2Q1;G3V4C1;G3V4W0;P07910;P07910-2	0.198362	0.0550887	18.0711	18.1944	18.084	17.9732	18.2588	18.2828
PTBP1	A0A0U1RRM4;P26599;P26599-2;P26599-3	0.1613	0.0536995	18.149	17.7752	17.8287	17.9055	18.0572	17.9512
DDX18	Q9NVP1	0.0214021	0.0529474	8.98589	10.7757	10.454	9.31948	9.72393	11.331
PKP3	Q9Y446;Q9Y446-2	0.0243026	0.0518414	11.7666	12.9898	10.845	11.2185	12.317	12.2215
SNRPF	P62306	0.0894321	0.0512918	16.1085	15.5931	15.7037	15.6732	16.1073	15.7786
RRM2B	Q7LG56	0.0814639	0.0506732	14.129	13.9678	13.519	13.9586	14.1145	13.6948
IPO9	Q96P70	0.0414072	0.0497872	10.648	11.0686	9.78179	10.6688	10.7374	10.2416
GAPVD1	F8W9S7;Q14C86;Q14C86-2;Q14C86-3;Q14C86-4;Q14C86-5;Q14C86-6	0.0780819	0.0497001	12.2727	12.285	12.4188	12.0828	12.2383	12.8045
KRT17	Q04695	0.017421	0.0462373	20.2584	21.1516	21.9255	22.1148	19.7059	21.6536
SMARCB1	A0A0G2JRV3;G5E975;Q12824;Q12824-2	0.191257	0.0461985	13.0017	12.957	12.7256	12.8862	13.0068	12.9299
SNRNP70	P08621;P08621-2	0.0666134	0.044425	16.4552	16.0566	15.7808	15.9184	16.3526	16.1549
CTTN	Q14247	0.0621227	0.043807	13.9749	14.7284	14.2181	14.5551	14.2762	14.2215
MVP	H3BQK6;Q14764	0.0759177	0.0437091	12.0003	11.4527	12.0507	11.9151	11.7506	11.9691
NTMT1	Q9BV86	0.128576	0.0426938	14.6088	14.2552	14.3085	14.4492	14.5153	14.3362
EXOSC5	M0R050;Q9NQT4	0.0208815	0.0422926	12.6381	10.6393	10.8058	10.9961	11.7209	11.4931
PRPF19	Q9UMS4	0.130049	0.0421991	15.2813	15.5355	15.243	15.2765	15.3729	15.5371
SEC23B	A0A2R8YFH5;Q15437	0.229225	0.0415611	14.7061	14.586	14.5004	14.7099	14.5774	14.6299
LARP4	A0A087WTL9;F8VY40;F8W1I4;Q71RC2;Q71RC2-3;Q71RC2-4;Q71RC2-5;Q71RC2-6;Q71RC2-7;Q8TBL5;Q96J85	0.0436052	0.0414734	12.9233	13.7172	13.1242	13.6372	13.3677	12.8843
CAPNS1	A0A0C4DGQ5;K7ELJ7;P04632	0.0755954	0.0408487	14.184	14.7171	14.1949	14.4439	14.507	14.2675
PSMD1	A0A087WW66;A0A7I2V262;A0A7I2V2K8;A0A7I2V4X0;A0A7I2V523;A0A7I2V5C8;A0A7I2V641;A0A7I2YQI9;A0A7I2YQY1;A0A7P0MW50;Q99460;Q99460-2	0.0970546	0.0405248	12.627	12.5008	12.9967	12.7292	12.7767	12.7401
SEC61G	P60059	0.0519701	0.0393998	12.6602	12.2125	12.4176	12.6532	12.0192	12.7361
PRPF8	Q6P2Q9	0.0450617	0.0390247	14.8767	15.5718	14.5831	15.1277	14.9937	15.0272
DYNC1H1	A0A2R8Y5T0;A0A7P0T9C4;A0A7P0TA13;Q14204	0.0885597	0.0388037	14.5441	14.0948	14.4161	14.235	14.4358	14.5007
TRIM33	H0Y612;Q9UPN9;Q9UPN9-2	0.0337761	0.037872	11.1733	10.4068	11.4941	11.3983	10.7106	11.0788
UBE2S	K7EPJ1;Q16763	0.113151	0.03722	16.7474	16.7022	16.7516	16.7294	16.9933	16.5901
XRN2	Q9H0D6;Q9H0D6-2	0.0884288	0.0368646	14.9136	14.6649	14.5721	14.9525	14.5832	14.7254
MCMBP	Q9BTE3-2	0.139298	0.0363547	16.6251	16.3429	16.5097	16.481	16.631	16.4748
N4BP1	O75113	0.0187054	0.0359631	8.35333	10.0634	10.396	9.55366	9.54353	9.82345
GLOD4	F6TLX2;Q9HC38-2	0.188872	0.034565	16.4776	16.5588	16.4145	16.4206	16.6153	16.5187
RPL11	P62913	0.0439257	0.034037	16.3971	16.2361	15.6121	15.9539	16.3318	16.0616
UBE2H	C9JZY6;H7C4M9;P62256;P62256-2	0.0314069	0.0330184	15.4375	16.5653	16.1288	16.2876	15.8304	16.1126
ZNF618	Q5T7W0;Q5T7W0-2;Q5T7W0-4	0.0311032	0.0319344	12.8344	12.8406	11.9988	12.871	12.1938	12.7047
PSMC1	P62191;P62191-2	0.0611673	0.0315657	13.4804	13.0186	13.3775	13.4366	13.4343	13.1004
CNN3	Q15417;Q15417-3	0.0488006	0.030599	15.7824	16.2229	15.5402	15.7363	15.8902	16.0108
POLD1	A0A087WYJ2;A0A2R8Y705;A0A2R8Y7K6;M0QZR8;M0R2B7;P28340	0.0176046	0.030571	10.8888	11.5409	12.5903	12.174	11.1597	11.778
PTBP3	O95758;O95758-5	0.0703871	0.0302639	14.5415	14.1127	14.5139	14.3798	14.3441	14.535
MARCKSL1	P49006	0.0615328	0.0298859	13.5248	13.1562	13.0187	13.1453	13.4016	13.2425
ETHE1	O95571	0.068822	0.0289275	15.789	15.4206	15.324	15.568	15.4638	15.5886
ABRACL	Q5SZC9;Q9P1F3	0.0357653	0.0280501	15.975	15.2736	15.5512	15.4823	15.9669	15.4348
RPS25	P62851	0.0347119	0.0268313	18.2788	17.604	17.7634	17.5814	18.0602	18.085
RPS5	M0R0F0;P46782	0.0838636	0.0266053	16.1347	15.8576	16.0089	15.8788	16.1471	16.0551
C5orf51	A0A0C4DGW6;A6NDU8	0.0125333	0.0263402	9.6078	11.3371	10.2945	11.3657	9.7658	10.187
GEMIN5	Q8TEQ6	0.0888483	0.0259333	16.0839	16.0665	15.7916	15.9573	16.0913	15.9712
RARS1	P54136	0.175027	0.0239201	16.0842	15.9161	15.966	15.9864	16.0164	16.0352
TSN	E9PGT1;Q15631	0.0291469	0.0231285	14.7697	14.1103	13.9943	14.094	14.4716	14.378
PDIA3	P30101	0.0626413	0.0230805	16.3015	15.9781	15.9614	16.1364	16.1946	15.9792
DDX46	A0A0C4DG89	0.0245779	0.0228573	15.0315	14.8776	14.2808	14.9291	14.333	14.9963
SRSF11	Q05519;Q05519-2;Q5T760	0.0300246	0.0224212	15.0267	15.1784	14.4056	14.7302	15.0188	14.9289
GCN1	Q92616	0.127393	0.0217279	14.1723	14.3024	14.3839	14.3206	14.3166	14.2866
RBM25	P49756	0.0292644	0.0213296	14.9298	14.3802	14.2242	14.2968	14.684	14.6173
C11orf98;;C11orf98	A0A494BXY3;E9PLD3;E9PRG8	0.0326615	0.0208569	12.8636	12.6449	12.2488	12.6085	12.8111	12.4003
DDX3X	A0A0D9SF53;A0A0D9SFB3;A0A0D9SG12;A0A2R8Y4A4;A0A2R8Y5G6;A0A2R8Y645;A0A2R8Y7T2;A0A2R8YCW1;A0A2R8YDT5;A0A2R8YF78;A0A2R8YFR4;A0A2R8YFS5;A0A2U3TZJ9;O00571;O00571-2	0.030116	0.0201209	15.6508	15.8713	15.2788	15.347	15.8344	15.6799
CTU2	H3BSW6;Q2VPK5	0.0231154	0.0189838	14.6713	15.5024	14.8153	15.1786	14.8406	15.0268
CAPZB	P47756-2	0.0289301	0.0188249	16.7463	17.4041	16.8799	17.2	16.9166	16.9702
DHX9	Q08211	0.122488	0.0188122	15.0495	15.1051	15.1056	15.0225	15.2039	15.0902
HADHA	H0YFD6;P40939	0.030931	0.0187356	12.5878	12.0829	12.3884	12.1907	12.2734	12.6512
MDN1	Q5T795;Q9NU22	0.019356	0.0184228	11.6166	10.7895	11.7393	11.2983	11.2889	11.6135
RAB21	Q9UL25	0.0583494	0.0181526	14.5777	14.3464	14.3726	14.3063	14.5785	14.4664
RPS15A	P62244	0.0398383	0.0177269	17.1916	17.6157	17.2208	17.3726	17.4657	17.243
UBXN1	A0A087WTZ5;E9PJ81;E9PRQ7;Q04323;Q04323-2	0.0379945	0.0161715	15.1802	14.7531	15.0064	15.1129	15.0163	14.8589
CHMP1A	A0A6Q8PF35;F5H875;F8VUA2;Q9HD42	0.0155662	0.0158526	16.1098	14.9755	15.4612	15.45	15.686	15.458
EIF3CL;EIF3C;EIF3C	B5ME19;Q99613;Q99613-2	0.0087904	0.015556	13.1503	15.0772	13.6619	13.9353	13.8621	14.1386
EIF4EBP1	Q13541	0.0124715	0.0153974	15.5211	14.1931	14.8358	14.5882	15.0205	14.9876
MATR3	A0A0R4J2E8;A8MXP9;P43243	0.0469534	0.0149085	14.7911	14.6359	14.5417	14.5118	14.7279	14.7738
S100A8	P05109	0.00636544	0.0142555	14.813	15.4082	13.5082	14.9939	13.6454	15.133
RAB10	P61026	0.00806597	0.0132233	12.0492	13.5163	13.7812	13.1235	13.1019	13.1609
ILF2	B4DY09;Q12905	0.0595714	0.0125275	16.7107	16.7346	16.5738	16.731	16.7456	16.5801
FLNB	A0A804HK76;O75369;O75369-2;O75369-3;O75369-6;O75369-8;O75369-9	0.0500083	0.0122086	14.4419	14.3402	14.1633	14.2902	14.3584	14.3334
ACOT11	Q8WXI4;Q8WXI4-2	0.00348944	0.0118154	13.36	9.99856	12.8912	11.4054	12.5255	12.3543
PSMD2	Q13200	0.0267684	0.0113538	13.3575	13.8257	13.7202	13.6454	13.6261	13.6659
PRKDC	P78527;P78527-2	0.0515305	0.0108576	14.388	14.4899	14.5989	14.4269	14.5251	14.5574
SRP68	Q9UHB9;Q9UHB9-4	0.00827821	0.0105524	12.7517	12.6586	12.1054	11.7841	12.9396	12.8237
KRT31	Q15323	0.00114909	0.010273	21.1616	14.691	12.5413	15.729	14.0577	18.638
NUP188	Q5SRE5;Q5SRE5-2	0.00480917	0.00969791	10.5296	9.22378	11.3615	10.001	10.3741	10.7688
BUB1B	O60566;O60566-2;O60566-3	0.0111851	0.00962035	13.6247	13.0516	12.6572	13.0421	13.147	13.1732
NCBP1	Q09161	0.00810173	0.00872008	14.156	13.0026	13.832	13.5257	13.6707	13.8203
XPO1	A0A7I2V2Y6;A0A7I2V3P3;A0A7I2YQV4;O14980	0.0447453	0.00794856	13.7716	13.8239	13.9627	13.8782	13.8846	13.8193
PPP2R5D	E9PFR3;H0Y8C4;H7C5Q9;Q14738;Q14738-2;Q14738-3	0.00739543	0.00729243	13.8727	13.157	13.1691	12.9655	13.6018	13.6533
ESRP2	Q9H6T0;Q9H6T0-2	0.0368725	0.00710615	14.0443	13.9074	13.8503	13.9147	14.0026	13.9059
TUBB6	Q9BUF5	0.0122748	0.00655365	14.1919	13.9579	14.3364	13.975	14.096	14.4348
MTAP	Q13126	0.0140683	0.00540924	16.4155	16.5033	16.1061	16.3064	16.429	16.3058
ATG4B	Q9Y4P1;Q9Y4P1-2;Q9Y4P1-6	0.00918861	0.00436211	14.8215	14.5661	14.3184	14.687	14.5312	14.5009
WDR77	Q9BQA1	0.00418968	0.00321547	14.0883	13.6586	14.3537	13.7396	14.1853	14.1854
PSMC2	C9JX88;P35998;P35998-2	0.00184098	0.00204055	13.9229	12.9302	13.6799	13.1694	13.4942	13.8755
MDH1	A0A5K1VW95;P40925;P40925-3	0.00127966	0.00201797	14.4998	12.8187	14.0682	13.6786	13.7124	14.0018
VRK3	Q8IV63;Q8IV63-3	0.00218913	0.0019083	12.2738	12.7896	12.5167	12.0446	12.7431	12.7982
PITPNB	A0A0A0MSW4;B3KYB6;B3KYB7;P48739;P48739-2;P48739-3	0.0032435	0.00167306	12.8259	12.9694	13.2116	12.762	13.0666	13.1833
SRSF7	A0A0B4J1Z1;C9JAB2;Q16629;Q16629-2;Q16629-3;Q16629-4	0.00198583	0.00144831	17.8181	17.6705	17.0796	17.3898	17.6529	17.5299
PDIA3	H7BZJ3	0.000741894	0.000940323	13.8315	12.4547	13.2917	13.1466	13.046	13.3881
SNU13	A0A3B3IUA2;B1AHD1;P55769	NaN	0	9.78892	8.02352	9.45946	9.40289	10.0137	9.68141
NEK9	A0A7I2V454;A0A7I2V5R1;Q8TD19	NaN	0	9.32059	10.2486	9.57598	10.1607	9.54192	9.37986
TIMELESS	Q9UNS1;Q9UNS1-2	NaN	0	9.87797	9.60111	10.2035	8.81297	9.41338	10.5244
HSPB1	A0A6Q8PFK8;P04792	0.00236654	-0.00101852	16.1964	16.1475	16.313	16.1763	16.0135	16.4641
C1QBP	I3L3B0;I3L3Q7;Q07021	0.000930241	-0.00145276	11.5677	10.7291	12.2693	11.5447	11.081	11.9362
TBCD	A0A804HHW7;A0A804HI02;A0A804HI57;A0A804HIC0;A0A804HIN6;A0A804HIU1;A0A804HJ32;A0A804HJ57;A0A804HJY5;A0A804HKB9;A0A804HKT8;A0A804HL21;A0A804HL62;A0A804HLF8;A0A804HLI2;J3KR97;Q9BTW9;Q9BTW9-4;Q9BTW9-5	0.00147425	-0.00186221	10.8296	10.3866	10.4384	10.2543	10.0765	11.3182
PDRG1	Q9NUG6	0.00140354	-0.00191593	12.2263	11.4631	11.7427	11.1225	12.4564	11.8476
IPO5	H0Y8C6;O00410;O00410-3	0.00402703	-0.00208346	18.0244	18.4208	17.8563	18.1473	18.0608	18.0871
KPNA3	O00505	0.00274717	-0.00282669	11.515	11.6203	12.2489	11.5315	12.2837	11.5605
FN3KRP	Q9HA64	0.00602476	-0.00383727	16.4726	15.8958	15.9628	15.9729	16.3075	16.0393
TARDBP	A0A087WX29;Q13148	0.00458568	-0.004131	12.8312	13.4868	13.7584	13.306	13.5579	13.2001
CSE1L	P55060;P55060-3	0.0560809	-0.00654602	15.6976	15.573	15.6728	15.6251	15.6675	15.6312
COPZ1	F8VUC5;F8VVA7;F8VXB1;F8VYZ4;F8W156;F8W651;P61923;P61923-5	0.0144171	-0.00668907	12.84	13.0916	13.0773	13.1467	12.7372	13.1049
TUBA3C;TUBA3D	P0DPH7;P0DPH8	0.0111668	-0.007068	16.5792	16.1032	16.6853	16.3095	16.6603	16.3766
SERPINH1	P50454	0.0104305	-0.00742435	14.0338	14.6516	13.9612	14.2741	14.309	14.0413
DPCD	Q5JQQ4;Q9BVM2	0.00641013	-0.00782363	11.8036	10.4865	11.4225	11.2822	11.3437	11.0631
SNRPA1	P09661	0.0110268	-0.00814756	21.3576	22.0574	21.6626	21.6387	21.9385	21.476
ABCF1	Q5STZ8;Q8NE71;Q8NE71-2	0.00701869	-0.00829887	13.2571	14.2978	13.1672	13.7592	13.2982	13.6398
RBPJ	A0A7P0T947;A0A7P0T9Y9;A0A7P0TBJ4;A0A7P0Z4N7;D6RF98;Q06330;Q06330-2;Q06330-3;Q06330-4;Q06330-5;Q06330-6;Q06330-7	0.017876	-0.00858847	14.1983	13.7385	14.203	14.099	13.958	14.057
NME2;NME1-NME2	P22392-2;Q32Q12	0.0787392	-0.00949224	18.2671	18.2246	18.1469	18.1604	18.2427	18.207
COA4	Q9NYJ1	0.00670494	-0.0107393	13.3621	14.6369	14.5396	14.8276	13.8444	13.8343
DDX52	Q9Y2R4	0.00297686	-0.0109949	9.33214	11.1785	7.95924	10.3199	7.94866	10.1683
TCF25	Q9BQ70	0.0137398	-0.0114539	13.8939	13.2347	13.8878	13.3326	13.8868	13.7628
LIN7C	Q9NUP9	0.00756057	-0.0114727	12.4563	11.5633	12.6071	11.4831	12.3431	12.7659
IPO7	O95373	0.0450455	-0.0119982	13.6023	13.2997	13.4042	13.3871	13.457	13.4262
EEF2	P13639	0.0367788	-0.0120036	19.5094	19.2038	19.2346	19.2244	19.4042	19.2832
CDC73	Q6P1J9	0.013701	-0.0122938	12.4423	13.1112	12.1273	12.4962	12.4749	12.6728
ESYT1	Q9BSJ8;Q9BSJ8-2	0.0351523	-0.0136814	11.6301	11.8212	11.5981	11.4675	11.8534	11.6874
BOLA2B	Q9H3K6	0.0288827	-0.014342	19.4052	18.989	18.8995	19.0104	19.2023	19.038
NHLRC2	Q8NBF2;Q8NBF2-2	0.024333	-0.0147104	13.4326	13.6426	13.0849	13.244	13.6124	13.2597
CAPZA2	P47755	0.0296241	-0.0150547	17.5271	17.7675	17.264	17.5413	17.6385	17.3336
SF3B1	O75533	0.0187308	-0.0159527	14.1837	15.0353	14.1942	14.5048	14.4237	14.4368
SEC24B	O95487;O95487-2;O95487-3	0.0126961	-0.0168765	14.5518	13.8198	13.3575	13.6001	14.4287	13.6497
TIA1;TIA1;TIA1;TIA1;TIA1;TIAL1;TIAL1	C9JTN7;F8W8I6;F8WE16;P31483;P31483-2;Q01085;Q01085-2	0.00722776	-0.0174926	9.62057	11.176	9.45894	10.8586	10.3981	8.94623
PYGB	P11216	0.0248144	-0.0177568	15.2273	15.7192	14.9552	15.3097	15.4165	15.1223
KARS1	Q15046	0.0285933	-0.0188195	14.2109	14.5169	14.4245	14.692	14.407	13.9968
PARP4	Q9UKK3	0.0357029	-0.0201028	12.7836	12.3559	12.7857	12.8733	12.4814	12.5101
EXOC6	E7EW84	0.0215781	-0.0212491	22.0389	21.1727	21.007	21.2359	21.4566	21.4624
LMNA	A0A6Q8PFJ0;P02545	0.108462	-0.0217425	16.3387	16.2069	16.0975	16.2179	16.1539	16.2061
TTC27	A0A3B3IS02;Q6P3X3	0.0158172	-0.0219428	9.78454	9.69676	8.77275	9.61976	9.81607	8.75239
EMC1	Q8N766;Q8N766-2;Q8N766-3;Q8N766-4	0.0602643	-0.0252666	12.2652	12.1516	12.5375	12.4713	12.2166	12.1906
RFC3	P40938;P40938-2	0.0239362	-0.0256624	11.7405	12.7783	12.5289	11.9806	12.558	12.4322
GTSF1	G3V1V4;Q8WW33	0.0262623	-0.0273348	17.0666	17.9826	17.1554	17.7211	17.3416	17.0599
PHB2	Q99623	0.0585909	-0.0279175	15.9074	15.6001	16.1061	15.7064	15.9622	15.8613
PCMT1	A0A0A0MRJ6;P22061;P22061-2	0.0764302	-0.028815	16.4531	16.0185	16.1406	16.135	16.2318	16.159
RHBDD2	Q6NTF9;Q6NTF9-2	0.0245491	-0.0301606	11.4788	12.281	12.8102	12.2573	12.3361	11.8861
DNAJA2	O60884	0.0442645	-0.0303494	13.934	13.4059	13.9593	13.4469	13.9444	13.8169
HSPA5	P11021	0.197805	-0.0303694	16.6984	16.7903	16.6517	16.7524	16.605	16.692
TRAPPC3	A0A087WWM0;A6NKE1;O43617;O43617-2	0.0488344	-0.0310198	14.8644	14.1631	14.5586	14.3721	14.6435	14.4775
;SLC25A10;SLC25A10	B4DLN1;Q9UBX3;Q9UBX3-2	0.0450348	-0.0312214	12.8822	13.3835	13.6305	13.1177	13.4206	13.2642
GART	P22102	0.112398	-0.0320053	18.5977	18.3086	18.3649	18.3039	18.4875	18.3839
PLK1	P53350	0.0753599	-0.0332836	13.0943	13.5682	13.1412	13.2312	13.3001	13.1726
SRBD1	Q8N5C6	0.111089	-0.0334711	13.4878	13.5019	13.3344	13.2732	13.5913	13.3592
TPM3	P06753-2	0.062692	-0.0338427	17.2579	16.6427	16.8681	16.8135	16.993	16.8607
PCBP2	Q15366;Q15366-2;Q15366-3;Q15366-6	0.11134	-0.0352669	18.8787	18.5234	18.6574	18.5535	18.7115	18.6886
KHSRP	M0R0C6;Q92945	0.0746606	-0.035504	19.1558	18.8011	18.6295	18.7206	18.9363	18.823
ELOB	Q15370;Q15370-2	0.0244393	-0.0355867	14.9701	15.346	14.0818	15.3821	14.5174	14.3917
CNOT1	A5YKK6;A5YKK6-2;A5YKK6-3;A5YKK6-4	0.0649504	-0.036039	12.5696	12.0827	12.4727	12.1031	12.3949	12.5187
SLC25A6	P12236	0.0599422	-0.0361856	18.104	18.7912	18.4608	18.449	18.5104	18.2881
PSMD3	O43242;O43242-2	0.0478341	-0.0362104	12.4832	12.3858	12.9311	12.178	12.8314	12.682
EIF3I	A0A7I2V2M3;A0A7I2V3K6;A0A7I2V3N2;A0A7I2V4S8;A0A7I2V607;A0A7I2V613;A0A7I2V640;A0A7I2V685;A0A7I2YQF8;A0A7I2YQI2;A0A7I2YQI6;A0A7I2YQU2;A0A7P0MRT9;Q13347;Q5TFK1	0.0261123	-0.036946	12.6843	13.8161	12.8874	13.697	12.9808	12.5992
METAP1D	Q6UB28	0.121812	-0.0373414	13.1291	13.242	13.3107	13.387	13.0986	13.0843
ALB	A0A0C4DGB6;P02768	0.0189482	-0.0375563	15.3146	16.2363	15.8565	15.9168	14.6535	16.7245
ASRGL1	A0A087WUG3;E9PJK6;Q7L266	0.0386649	-0.0393416	12.6615	11.9611	12.7875	12.7721	11.9909	12.5291
ERCC6L	B5MDQ0;Q2NKX8	0.0162442	-0.0394268	9.8217	10.3264	9.52957	11.0045	10.1649	8.38997
ATP6V1A	P38606;P38606-2	0.0514287	-0.0399758	12.4376	12.6612	12.5864	13.0366	12.2146	12.314
DHX32	Q7L7V1;Q7L7V1-2	0.00954765	-0.0414139	10.071	13.441	8.65413	10.9266	10.7232	10.3922
THOC2	F2Z2V2;Q8NI27	0.0395279	-0.0414327	13.571	13.611	12.6755	12.8932	13.3289	13.5112
TUBA4A	P68366;P68366-2	0.0716012	-0.0422891	15.3468	14.8685	14.7533	15.0384	14.7496	15.0537
NUDCD1	Q96RS6	0.0849005	-0.0424871	14.4697	14.5429	14.2144	14.3201	14.6407	14.1388
CDK2	G3V5T9;P24941	0.112876	-0.0430559	15.3937	15.4262	15.341	15.3242	15.5888	15.1187
LANCL2	Q9NS86	0.191258	-0.043101	16.7802	16.8351	16.5887	16.605	16.734	16.7358
SQSTM1	Q13501	0.0356326	-0.0435816	14.1257	13.0641	13.7686	13.0843	13.9972	13.746
RPL30	E5RI99;P62888	0.0657278	-0.0444876	19.6601	19.0692	19.1866	19.1947	19.5502	19.0376
MAPK10;MAPK10;MAPK10;MAPK10;MAPK10;MAPK10;MAPK10;MAPK10;MAPK10;MAPK10;MAPK10;MAPK10;MAPK10;MAPK10;MAPK10;MAPK10;MAPK10;MAPK10;MAPK10;MAPK10;MAPK10;MAPK10;MAPK10;MAPK10;MAPK10;MAPK10;MAPK10;MAPK10;MAPK10;MAPK10;MAPK10;MAPK10;MAPK9;MAPK9;MAPK10;MAPK9;MAPK9;MAPK9;MAPK9;MAPK9;MAPK9;MAPK10;MAPK10;MAPK10	A0A1P0B7D2;A0A1W2PRF2;A0A286YEN5;A0A286YEQ0;A0A286YEQ7;A0A286YES0;A0A286YES9;A0A286YEV3;A0A286YEW9;A0A286YEX7;A0A286YEY0;A0A286YF02;A0A286YF19;A0A286YF35;A0A286YF62;A0A286YF83;A0A286YF85;A0A286YF97;A0A286YFA6;A0A286YFB6;A0A286YFC0;A0A286YFD7;A0A286YFE2;A0A286YFI3;A0A286YFJ4;A0A286YFJ6;A0A286YFK3;A0A286YFM6;A0A286YFN2;D6R9C1;D6RCB1;D6RJF9;D7R525;E5RJ57;F8W9R5;J3KNK1;P45984;P45984-2;P45984-3;P45984…	0.0406239	-0.0464093	12.2347	13.4054	12.9276	12.8823	13.0934	12.4527
ALKBH5	Q6P6C2;Q6P6C2-1	0.0183628	-0.0464595	10.3864	13.186	11.1662	11.7486	11.4369	11.4137
ERI3	A0A3B3ISV9;F6QUN3;F6UGJ8;H0Y4B0;O43414;O43414-2;O43414-3	0.0971718	-0.0465384	12.1433	12.3871	12.6369	12.3248	12.187	12.516
BANF1	O75531	0.0184021	-0.0473366	11.5086	14.2977	12.1121	12.8225	12.4469	12.507
GTF2I	A0A494C1K3;P78347;P78347-2;P78347-3;P78347-4	0.0805537	-0.0483936	14.7662	15.4071	14.8316	14.9623	14.846	15.0514
PTPMT1	E9PQM0;Q8WUK0;Q8WUK0-2;Q8WUK0-3	0.0348691	-0.0487391	12.3368	13.4449	12.274	13.1977	12.3781	12.3337
GPHN	F5H039;Q9NQX3;Q9NQX3-2	0.123307	-0.0488812	13.232	12.7904	13.066	12.9017	13.1126	12.9275
CTPS1	P17812	0.227526	-0.0492681	18.7933	18.8361	18.6204	18.6654	18.8053	18.6312
SNRPN;SNRPB;SNRPB;SNRPB;SNRPN;SNRPN	J3QLE5;P14678;P14678-2;P14678-3;P63162;P63162-2	0.0953911	-0.0495656	16.2879	16.2253	15.7474	15.967	16.1839	15.961
CRKL	P46109	0.110815	-0.0498613	19.3122	19.0483	18.8059	18.9999	18.8841	19.1328
DCD	P81605;P81605-2	0.0426704	-0.0507237	15.4321	15.9077	15.3026	16.0631	14.8256	15.6015
DGCR8	Q8WYQ5;Q8WYQ5-3	0.0289987	-0.0510807	11.4335	12.5359	12.1777	12.9063	11.8861	11.2016
U2AF2	P26368;P26368-2	0.0426895	-0.0522525	16.1632	17.235	15.9981	16.5897	16.1061	16.5436
H2AC1	Q96QV6	0.0216366	-0.0535917	9.88307	12.5484	10.4775	11.2244	10.6227	10.9011
GPN1	Q9HCN4;Q9HCN4-2;Q9HCN4-3;Q9HCN4-4;Q9HCN4-5	0.092792	-0.0540466	12.1403	11.4527	11.9027	11.6945	11.7712	11.8679
PCBP1	Q15365	0.108265	-0.0560767	19.2252	18.6565	18.6993	18.7252	18.8521	18.8354
GFPT1	A0A6I8PTT9;Q06210;Q06210-2	0.152103	-0.0570389	13.4079	13.7579	13.4997	13.6333	13.5408	13.3203
MAP2K3	P46734;P46734-3	0.0941213	-0.0577656	14.4532	14.7587	14.1334	14.6253	14.3444	14.2022
XRCC3	O43542	0.0624322	-0.0579456	13.1821	12.2587	12.8162	12.7429	12.3638	12.9764
ZFR	Q96KR1	0.076241	-0.0595999	13.0591	12.3736	12.2538	12.7189	12.4485	12.3404
RUVBL1	Q9Y265	0.101253	-0.0619405	15.3111	14.5817	14.9389	14.7729	14.991	14.882
UBE2N	P61088	0.109084	-0.0620848	15.0575	15.1503	14.6995	14.6753	15.1963	14.8494
S100A7	P31151	0.0198949	-0.0621707	14.6411	15.9315	12.8982	14.8814	13.3199	15.083
DDX46	Q7L014	0.0883885	-0.0622476	16.3155	16.7052	15.8732	16.0985	16.2805	16.3281
MYO1C	F5H6E2;O00159;O00159-2;O00159-3	0.0864369	-0.0623592	16.391	15.9595	16.6215	16.3521	16.4949	15.938
THOC3	Q96J01;Q96J01-2	0.0997008	-0.0624777	14.7107	14.2436	14.7995	14.2421	14.6013	14.7229
LUC7L3	J3KPP4;O95232	0.0483858	-0.0625598	12.5498	13.5294	12.0586	12.8408	12.5187	12.5906
SREK1	Q8WXA9-2	0.0438832	-0.0630579	12.315	13.8219	12.4191	12.8312	12.877	12.6586
HECTD1	A0A087X2H1;Q9ULT8	0.100357	-0.0633389	12.3114	11.8099	12.2655	11.7962	12.3509	12.0496
SNRPD3	P62318;P62318-2	0.108495	-0.0636139	17.9355	18.0637	17.4108	17.5991	17.8225	17.7975
ATXN10	Q9UBB4;Q9UBB4-2	0.151146	-0.0646152	13.9056	13.6068	13.5261	13.6857	13.7599	13.399
OLA1	J3KQ32;Q9NTK5	0.166863	-0.0654345	14.8888	14.7231	14.553	14.7145	14.8138	14.4404
TRIP12	A0A6Q8PGG9;A0A6Q8PHK0;Q14669;Q14669-2;Q14669-3	0.287847	-0.0656646	14.9877	14.8727	14.6872	14.8159	14.8085	14.7262
PRMT1	Q99873-3	0.131529	-0.0665213	16.6112	17.1169	16.5322	16.7488	16.6727	16.6392
OPA1	E5KLJ9;O60313-10;O60313-2;O60313-9	0.39516	-0.0680898	16.8712	16.74	16.6398	16.6508	16.7391	16.6568
NUDC	Q9Y266	0.0898521	-0.0681105	16.2487	15.3695	15.8127	15.6019	15.9137	15.7109
DNAJC7	A0A6I8PIK4;A0A6I8PR89;A0A6I8PU73;A0A6I8PU89;Q99615	0.0266368	-0.0697072	10.9921	13.4477	13.0415	13.1291	11.6182	12.5248
RANBP3	B7Z7F3;K7EIJ4;Q9H6Z4;Q9H6Z4-2;Q9H6Z4-3	0.0802868	-0.0697994	13.3536	13.0437	13.0178	13.3405	13.371	12.4943
PARS2	Q7L3T8	0.0970346	-0.0698433	15.1223	15.7547	14.9631	15.3884	15.1297	15.1124
RCC2	Q9P258	0.182498	-0.0706221	19.4979	19.112	19.1305	19.0381	19.3046	19.1859
EPCAM	B5MCA4;P16422	0.0890331	-0.0706393	14.4909	13.7896	14.4627	13.8949	14.1717	14.4647
EIF2B2	P49770	0.0890594	-0.0714464	12.5067	11.6161	11.9774	11.9432	12.1793	11.7633
UBAP1	Q9NZ09;Q9NZ09-2;Q9NZ09-4	0.106749	-0.0715268	13.6481	12.8637	13.3759	13.2987	13.2995	13.0749
RTKN	Q9BST9	0.370815	-0.0716476	14.0511	13.8698	13.7819	13.8046	13.8237	13.8596
CSRP2	Q16527	0.425419	-0.0716521	16.7308	16.5297	16.548	16.4809	16.5208	16.5918
MCTS1	Q9ULC4;Q9ULC4-2;Q9ULC4-3	0.167661	-0.0719252	12.2538	12.6135	12.0951	12.329	12.2655	12.1522
L2HGDH	C9JVN9;Q9H9P8;Q9H9P8-2	0.0319986	-0.0721801	10.196	12.0164	9.68517	10.7229	10.9424	10.0158
NR2F1;NR2F1;NR2F1;NR2F2;NR2F2;NR2F2	F1DAL7;F1DAL9;P10589;P24468;P24468-2;P24468-3	0.102974	-0.072937	11.0481	11.6486	11.8171	11.299	11.633	11.3631
PLEC	Q15149	0.213519	-0.0730079	15.3591	15.6932	15.5449	15.3557	15.3816	15.6408
EIF4A3	P38919	0.103764	-0.0734386	15.086	15.0694	14.3175	14.7479	14.7075	14.7971
HSPA9	A0A7I2V2G2;D6RCD7;P38646	0.261821	-0.074269	16.7256	16.9781	16.6253	16.7578	16.6195	16.729
UBE2L3	P68036;P68036-3	0.044841	-0.0752799	14.7249	16.5396	15.3205	15.8697	15.2718	15.2177
GTF3C1	Q12789;Q12789-3	1.03117	-0.0773595	12.859	12.911	12.8396	12.8125	12.7372	12.8279
RRM1	P23921	0.286767	-0.079045	16.3895	16.7474	16.4456	16.4401	16.4464	16.4588
SF1	A0A7P0T9U7;Q15637;Q15637-2;Q15637-3;Q15637-4;Q15637-5;Q15637-6;Q15637-7	0.0943057	-0.0791604	14.8026	15.3937	14.41	14.7373	14.6658	14.9657
IREB2	P48200	0.0826647	-0.0792567	12.5169	13.4241	12.635	13.089	12.7974	12.4519
PRPF3	O43395;O43395-3	0.0436454	-0.0802272	13.6944	13.1057	11.9794	12.8544	12.1937	13.4908
UBR7	E9PCJ7;G3V336;Q8N806	0.633212	-0.0802692	14.5379	14.5115	14.6736	14.4446	14.499	14.5385
MOB4;MOB4;MOB4;MOB4;HSPE1-MOB4	B4DM50;Q9Y3A3;Q9Y3A3-2;Q9Y3A3-3;S4R3N1	0.0824916	-0.0815674	13.4002	14.358	14.4808	13.8583	14.1143	14.0217
SUGT1	Q9Y2Z0;Q9Y2Z0-2	0.131657	-0.0824922	13.4111	13.7476	13.3477	13.2423	13.209	13.8076
FLNA	P21333;P21333-2	0.289111	-0.0827834	16.6082	16.8699	16.5091	16.5769	16.5072	16.6546
PRSS1	A6XGL3;E7EQ64;P07477	0.12187	-0.0829773	21.6539	21.9632	21.7259	21.9051	21.238	21.951
PRPF31	E7EN72;E7ESX0;E7EU94;E7EVX8;Q8WWY3;Q8WWY3-2;Q8WWY3-3;Q8WWY3-4	0.123157	-0.0833495	12.0534	12.6668	12.6809	12.1133	12.5005	12.5372
NUP155	O75694	0.272016	-0.0835937	16.1827	16.0316	15.8313	15.8737	16.0698	15.8514
PFN2	P35080	0.0605518	-0.0840721	18.2847	19.1683	18.0177	18.2636	17.914	19.0409
MYD88	Q99836;Q99836-6	0.269708	-0.0843709	16.6933	16.4408	16.3426	16.3952	16.5333	16.2951
RPS3	P23396	0.161214	-0.0844205	17.6269	17.834	17.2743	17.2771	17.5756	17.6293
PAICS	P22234	0.382918	-0.0844796	16.8701	16.5893	16.643	16.5538	16.6737	16.6215
IGHV3OR16-8;IGHV3OR16-17	A0A075B7F1;S4R3C0	0.0247684	-0.0846437	18.1451	21.7159	19.2314	19.9657	20.1303	18.7426
DUS2	E7EUN9;Q9NX74	0.0911639	-0.0871417	11.7787	12.2147	11.6161	11.5271	12.3612	11.4598
TUFM	P49411	0.369738	-0.0871957	16.9435	17.0996	16.7716	16.8811	16.8762	16.7958
EIF3K	K7ERF1;K7ES31;Q9UBQ5;Q9UBQ5-2	0.0199474	-0.0878105	13.1177	9.31562	13.0962	10.3481	12.8715	12.0464
ANXA11	P50995;P50995-2	0.0943081	-0.0880432	13.1763	14.188	13.8207	13.8756	13.6953	13.35
GHDC	K7ESN3;Q8N2G8;Q8N2G8-2;Q8N2G8-3	0.0624254	-0.0885515	12.7876	13.9964	12.4255	12.8855	13.2409	12.8174
VANGL1	Q8TAA9;Q8TAA9-2	0.0967269	-0.0891622	13.3777	14.4935	13.7406	13.7376	13.7689	13.8378
UBE2C	O00762	0.115746	-0.089331	13.8281	13.0126	13.3314	13.2164	13.5922	13.0955
HNRNPF	P52597	0.426477	-0.0900561	17.762	17.8672	17.6234	17.7012	17.7313	17.5499
CPSF3	G5E9W3;Q9UKF6	0.127883	-0.0901705	14.7439	14.2935	14.31	14.4248	14.6896	13.9624
MAT2B	Q9NZL9	0.185803	-0.091383	15.939	15.5841	15.3789	15.5332	15.7066	15.3879
ANXA1	P04083	0.317088	-0.0917028	16.6309	16.5875	16.3132	16.292	16.4646	16.4999
TXN	P10599	0.0350554	-0.092404	16.3004	19.1563	16.9435	17.8022	17.0992	17.2215
TOMM22	Q9NS69	0.0820482	-0.0928278	11.7691	12.7404	12.99	12.1719	12.3752	12.674
SURF4	O15260;O15260-2;O15260-3;Q5T8U5	0.14834	-0.0932344	13.2089	13.4582	13.8728	13.681	13.3165	13.2626
CCS	J3KNF4;O14618	0.0666689	-0.0941836	13.9135	15.3878	14.3669	14.8862	14.4007	14.0988
LYPLA2	O95372	0.237655	-0.095013	16.1495	16.1702	16.0323	16.1746	16.1728	15.7195
NFKB2	Q00653;Q00653-4	0.421839	-0.0952765	13.5673	13.3445	13.3126	13.3747	13.3575	13.2064
TRIM47	Q96LD4;Q96LD4-2	0.867775	-0.095513	13.7448	13.7912	13.7561	13.6499	13.7616	13.594
CBX3	Q13185	0.047076	-0.0957677	13.1237	15.2901	14.124	14.5769	14.1481	13.5255
TUBA1B	P68363	1.36725	-0.0970879	19.9364	19.8969	19.8717	19.7754	19.7793	19.8591
CENPM	B1AHQ6;B1AHQ7;Q9NSP4;Q9NSP4-2;Q9NSP4-4	0.0521889	-0.097379	11.9636	13.8457	11.9049	12.4609	12.6122	12.349
DCTD	P32321;P32321-2	0.151741	-0.0974938	13.9661	13.4212	13.3754	13.4589	13.7582	13.2532
NFU1	Q9UMS0;Q9UMS0-3	0.0921777	-0.0977268	15.0217	16.0946	14.9197	15.3201	15.2448	15.1779
MTHFD1L	A0A087WVM4;B7ZM99	0.611325	-0.0985629	17.2486	17.1315	17.0467	17.0042	17.1287	16.9982
CIAO3	Q9H6Q4	0.0783144	-0.0986223	15.4829	15.3396	14.2889	14.4817	15.2625	15.0713
NUMA1	Q14980;Q14980-2;Q14980-3;Q14980-4	0.575657	-0.0993614	12.9391	13.0773	13.0308	12.9184	12.8024	13.0284
IAH1	Q2TAA2	0.207205	-0.100129	16.4665	15.8912	16.0266	16.1204	16.0708	15.8928
PRMT3	O60678;O60678-2	0.365603	-0.102013	12.208	12.4595	12.3841	12.3537	12.0702	12.3216
BOLA1	Q9Y3E2	0.733828	-0.102374	14.9531	15.1674	15.0122	14.9396	14.9462	14.9399
NUBP2	Q9Y5Y2	0.220145	-0.10309	15.9281	15.3919	15.9441	15.674	15.6127	15.6681
FASTKD2	Q9NYY8;Q9NYY8-2	0.0437503	-0.103232	10.8554	8.48397	9.61515	10.2864	9.53879	8.8196
PFDN4	E9PQY2;Q9NQP4	0.220301	-0.104683	14.2652	13.8863	13.7278	14.0289	13.8316	13.7048
SF3B6	Q9Y3B4	0.142093	-0.106165	15.2182	16.0187	15.2227	15.5227	15.359	15.2595
TXNDC17	Q9BRA2	0.321886	-0.107202	16.4552	16.0429	16.0659	16.106	16.1112	16.0251
HDHD3	Q9BSH5	0.188203	-0.107534	15.6371	14.908	15.3127	15.1042	15.2903	15.1407
ARPC4-TTLL3;ARPC4-TTLL3;ARPC4;ARPC4-TTLL3;ARPC4;ARPC4;ARPC4	A0A0A6YYG9;F8WCF6;F8WDD7;H7C0A3;P59998;P59998-2;P59998-3	0.204838	-0.107576	14.1464	13.666	13.7471	13.7267	13.5162	13.9938
CFL1	P23528	0.158568	-0.107716	18.8353	18.2582	18.5027	18.0404	18.603	18.6295
HEATR3	Q7Z4Q2;Q7Z4Q2-2	0.0359651	-0.107958	9.1808	11.3774	8.73811	10.8569	9.2077	8.90785
ADSS2	P30520	0.231612	-0.108696	14.9268	14.561	14.7303	14.3995	14.9138	14.5788
RRBP1	A0A087WVV2;F8W7S5;Q9P2E9;Q9P2E9-3	0.139285	-0.110237	13.8801	13.4461	13.017	13.3777	13.0534	13.5814
PCYT1A	C9J050;C9J2E1;C9JEJ2;C9JPY0;C9JVS0;F8WAZ5;P49585	0.0482003	-0.110268	10.9502	13.0944	11.2169	11.8471	12.2107	10.8729
ANAPC7	Q9UJX3;Q9UJX3-2	0.0368998	-0.111068	8.26767	11.1345	10.5046	10.8626	9.66377	9.04724
NEK6;NEK6;NEK6;NEK6;NEK6;NEK7;NEK6;NEK6;NEK6;NEK6	Q5TBG1;Q5TBG7;Q5TBH0;Q5TBH1;Q5TBH2;Q8TDX7;Q9HC98;Q9HC98-2;Q9HC98-3;Q9HC98-4	0.09891	-0.111789	12.9401	11.7953	12.7868	12.0361	12.4781	12.6727
DDX47	Q9H0S4;Q9H0S4-2	0.0661802	-0.1129	12.3396	14.3594	13.3929	13.0215	13.34	13.3917
RAD51C	J3QKK3;O43502	0.145394	-0.11395	12.1907	13.1069	12.585	12.5311	12.2978	12.712
WDR12	Q9GZL7	0.146963	-0.113974	11.8667	11.9578	11.462	11.2615	12.1019	11.5812
UBR4	A0A0A0MSW0;Q5T4S7;Q5T4S7-2;Q5T4S7-3;Q5T4S7-4;Q5T4S7-5	0.119736	-0.114252	11.7182	10.7656	11.3926	11.3191	10.7703	11.4442
PYGL	E9PK47;P06737;P06737-2	0.10957	-0.114979	12.0616	13.2489	12.6853	12.7874	12.6246	12.2389
PELP1	C9JFV4;I3L1P4;I3L445;I3L4M7;Q8IZL8	0.0953361	-0.116022	12.3788	11.6419	11.3169	11.1132	12.1502	11.7262
HSPH1	Q92598;Q92598-2;Q92598-3	0.269371	-0.116441	15.1589	14.7671	14.7496	14.5816	14.9622	14.7824
UBA1	P22314;P22314-2	0.269965	-0.11681	14.9109	14.3926	14.4124	14.4045	14.4374	14.5236
AP1G1	B4DGE1;H3BN71;H3BNR4;H3BR36;H3BRM7;H3BUN9;O43747;O43747-2	0.0700529	-0.117163	10.822	12.5482	11.422	12.0299	11.0262	11.3847
DSTN	P60981	0.263347	-0.117472	17.0564	17.1423	16.6393	16.8674	16.6624	16.9558
KHDRBS1	Q07666;Q07666-2;Q07666-3	0.159211	-0.117676	14.6136	14.8474	14.1792	14.1271	14.7975	14.3626
EEF1A1	P68104	0.312214	-0.118343	23.0105	22.7989	22.5566	22.5289	22.8141	22.668
MCM3	P25205	0.331876	-0.118785	17.4517	17.5627	17.1566	17.1522	17.4338	17.2287
SLBP	F8W8D3;Q14493	0.270927	-0.118971	15.4083	14.8808	15.1524	14.9288	15.2036	14.9521
HNRNPK	P61978;P61978-2;P61978-3	0.373713	-0.120749	16.2706	16.0286	15.9247	15.9107	16.1242	15.8267
PPIA	P62937	0.336909	-0.121168	19.2739	18.7982	18.8901	18.8538	18.8236	18.9212
GCLM	P48507	0.253546	-0.121441	15.8405	16.0197	15.5774	15.9689	15.5851	15.5193
MCM6	Q14566	0.27585	-0.122119	12.9772	13.2081	13.3285	12.916	13.3385	12.8929
GGA2	H3BMM6;H3BMN6;I3L2C4;Q9UJY4	0.216715	-0.122392	13.6012	12.8585	13.1228	13.05	13.1343	13.031
MTPN	P58546	0.221805	-0.123288	13.9409	14.2778	13.6774	14.1008	13.6966	13.7287
ACTG1	I3L4N8;P63261	1.40893	-0.123416	19.3738	19.2904	19.3256	19.141	19.2439	19.2346
GARS1	P41250-2	0.188682	-0.124022	14.9305	14.1538	14.6434	14.4965	14.6135	14.2456
SLC2A1	P11166	0.388983	-0.124353	14.708	15.1128	14.9929	14.7303	14.7774	14.9329
IGKC	P01834	0.0652932	-0.124735	12.4313	13.1428	13.349	13.3869	11.6431	13.5189
YRDC	Q86U90	0.350842	-0.125922	16.0381	16.3229	15.8269	16.0061	15.9351	15.8688
UBE2O	Q9C0C9	0.419049	-0.126426	11.8912	11.6771	12.0845	11.8264	11.7908	11.6563
RARS2	Q5T160	0.207089	-0.126499	10.1805	10.5521	10.4048	10.4732	10.4521	9.83256
TUBB4B	P68371	0.403623	-0.126631	20.3106	20.0006	19.9033	19.8495	20.0234	19.9618
KHNYN	O15037	0.190795	-0.127035	10.6799	11.1299	10.6884	11.0839	10.6634	10.3699
NAA15	A0A0B4J1W3;Q9BXJ9	0.563255	-0.127364	12.0366	12.1223	11.919	12.0119	11.9428	11.741
PRRC2C	E7EPN9;Q9Y520;Q9Y520-2;Q9Y520-4;Q9Y520-5;Q9Y520-6;Q9Y520-7	0.383699	-0.128317	14.764	14.3791	14.4167	14.5183	14.2803	14.3764
KRT4	P19013	0.0199623	-0.128331	10.7454	15.8048	16.9679	16.2749	13.7536	13.1046
NT5DC1	Q5QPD0;Q5TFE4	0.0898677	-0.128698	13.8353	12.156	12.6469	12.5624	12.7606	12.9291
LUC7L	Q9NQ29;Q9NQ29-2	0.149683	-0.128715	15.7281	16.1719	15.0729	15.5049	15.497	15.5849
;;CTSD;CTSD;CTSD;CTSD;CTSD;CTSD;;CTSD	A0A1B0GU03;A0A1B0GU92;A0A1B0GV23;A0A1B0GVD5;A0A1B0GW44;A0A1B0GWE8;C9JH19;F8W787;H7C469;P07339	0.241142	-0.128954	13.6794	14.1138	14.2525	14.1283	13.7544	13.7762
DIMT1	A0A494C0G7;A0A7P0T9J1;A0A7P0T9Y7;A0A7P0Z4I0;Q9UNQ2	0.171318	-0.130737	11.8872	12.6096	12.2993	12.2066	11.76	12.4373
PSME1	Q06323	0.139795	-0.131301	14.8457	16.0311	15.5316	15.4074	15.3714	15.2357
STARD7	Q9NQZ5	0.238069	-0.131543	14.833	14.4033	14.1045	14.2913	14.4137	14.2413
SDSL	H0YID3;Q96GA7	0.144054	-0.132273	9.46302	9.28949	8.73173	8.56182	9.45945	9.06615
SF3B4	Q15427	0.0709579	-0.132839	13.4313	15.1379	13.0615	13.7226	13.5071	14.0023
NSUN5	Q96P11;Q96P11-2;Q96P11-4	0.287987	-0.134492	13.9148	14.3233	13.7311	13.9898	13.8238	13.7522
QSOX2	Q6ZRP7	0.0853626	-0.134962	14.6535	12.8645	13.4539	13.2485	13.8939	13.4245
HNRNPL	P14866	0.496024	-0.135277	16.4716	16.2267	16.1714	16.0101	16.2627	16.1911
KPNB1	Q14974	0.707781	-0.135782	15.6372	15.4937	15.3708	15.2962	15.3579	15.4403
DCAF13	A0A087WT20;A0A087X1F8;Q9NV06	0.13101	-0.135953	11.2211	12.0176	12.2094	12.1388	11.3857	11.5158
EIF6	P56537	0.282892	-0.137136	14.6497	14.448	14.8525	14.6831	14.6556	14.2002
FLYWCH2	I3L1Y9;Q96CP2	0.245992	-0.138671	14.2576	13.5302	13.8268	13.7634	13.8383	13.597
DUSP23	Q9BVJ7	0.3398	-0.138692	13.9505	14.4564	14.1682	14.1027	13.8897	14.1666
SKP1	E5RJR5;P63208	0.0808507	-0.139573	14.6023	16.0839	14.4016	15.3659	14.9687	14.3344
ATP2A2	P16615;P16615-2;P16615-3;P16615-5	0.127066	-0.140554	12.1402	13.4749	13.1313	12.8506	12.6437	12.8304
INTS11	A0A087WYI0;C9IYS7;C9J979;Q5TA45;Q5TA45-2;Q5TA45-3;Q5TA45-4;Q5TA45-5	0.161329	-0.140803	14.3145	14.5017	14.39	13.6147	14.5936	14.5755
PTPN11	Q06124;Q06124-1	0.138579	-0.142138	15.4869	16.1288	15.0287	15.1494	15.2574	15.8111
ISOC2	Q96AB3	0.501237	-0.142519	17.7267	17.4131	17.3639	17.26	17.4242	17.392
SYNCRIP	A0A7I2V4Z0;A0A7I2YQN2;O60506;O60506-3	0.192154	-0.143305	14.8244	15.6839	14.8656	15.0369	14.8651	15.042
WDR18	Q9BV38;U3KQC1	0.381635	-0.143464	14.8223	14.4709	14.5721	14.2814	14.6913	14.4622
POLR2B	C9J2Y9;P30876	0.294419	-0.145241	13.3054	12.6961	13.1927	12.9514	12.7853	13.0218
ABCD3	A0A3B3ITW3;P28288;P28288-2	0.322095	-0.145267	13.0369	12.6862	12.8556	12.5552	13.024	12.5636
RPAP1	H3BRE8;Q9BWH6;Q9BWH6-2	0.177055	-0.146806	12.8193	11.9328	12.3481	11.8981	12.5318	12.2299
HSPD1	P10809	0.471319	-0.146838	17.7976	17.4708	17.4447	17.3045	17.4117	17.5564
EIF4E	D6RBW1;P06730;P06730-2;P06730-3	0.328573	-0.1472	14.3656	14.9962	14.7213	14.5985	14.52	14.5229
CTU1	Q7Z7A3	0.242367	-0.147935	14.1289	13.6027	13.7521	13.3144	13.8453	13.8802
WDR45B	Q5MNZ6	0.202651	-0.148355	13.0969	13.7152	12.7591	13.0326	13.1104	12.9831
RPP30	P78346;P78346-2;Q5VU11	0.294404	-0.149745	14.6793	14.63	14.1057	14.2937	14.4964	14.1755
PPM1G	O15355	0.237249	-0.150823	14.0088	13.2506	13.8382	13.691	13.3576	13.5966
HNRNPU	A0A1W2PPS1;Q00839;Q00839-2	0.942766	-0.151059	17.8957	17.674	17.7012	17.6596	17.5709	17.5873
MAP2K4	P45985;P45985-2	0.200301	-0.152087	13.4225	13.421	12.7922	13.07	13.4075	12.702
CDC37	K7EQA9;Q16543	0.310432	-0.1531	13.5033	12.8977	13.2788	13.2655	12.9641	12.9908
TPR	P12270;P12270-2	0.0687068	-0.15432	10.3308	12.5901	11.7914	12.0363	10.6102	11.6028
;PSMA1;PSMA1	B4DEV8;P25786;P25786-2	0.19614	-0.154584	13.1696	13.0245	13.9419	13.1394	13.1035	13.4294
KIF4A	O95239	0.104026	-0.154743	11.938	10.3645	10.806	10.3662	11.1913	11.0868
PKM	P14618	0.245291	-0.154941	16.0661	16.4756	16.817	16.2514	16.1115	16.531
ZC3HAV1	A0A7P0T8C6;Q7Z2W4	0.294755	-0.155209	12.5407	12.5175	12.0278	12.3013	11.9451	12.374
RPS29	P62273	0.211367	-0.155463	14.5378	14.5777	14.0028	13.8145	14.5575	14.2799
GGH	Q92820	0.148669	-0.155498	11.6582	12.1386	12.8831	12.2414	11.7569	12.2152
RPL38	J3KT73;J3QL01;P63173	0.122376	-0.155856	14.885	15.8327	14.3393	14.8969	14.5681	15.1245
HNRNPLL	C9IYN3;Q8WVV9;Q8WVV9-4;V9GYK2	0.223076	-0.155866	13.9306	14.6603	13.962	14.2943	13.8894	13.9016
ASPSCR1	C9JAL9;J3KRG1;J3QR50;J3QRW3;Q9BZE9;Q9BZE9-2	0.174953	-0.156392	11.2593	10.5614	10.9093	11.0512	10.2095	11.0002
CHEK1	O14757	0.385765	-0.157997	15.9779	15.5054	15.4941	15.3773	15.6013	15.5247
;;PCLAF;PCLAF;PCLAF	A0A0U1RQC1;A0A0U1RQM0;H0YMA4;Q15004;Q15004-2	0.257211	-0.158081	13.6517	12.8448	13.4397	13.2271	13.1009	13.1338
PPP4C	H3BTA2;H3BV22;P60510	0.110468	-0.158425	14.5092	12.9439	12.9859	13.4503	13.2378	13.2756
AASDHPPT	Q9NRN7	0.265626	-0.158666	11.9302	11.3881	11.6743	11.609	11.155	11.7525
NAP1L1	B7Z9C2;F5H4R6;F8VUX1;F8VV59;F8VXI6;F8VY35;F8W020;F8W0J6;F8W118;F8W543;H0YH88;H0YHC3;H0YIV4;P55209;P55209-2;P55209-3	0.0709851	-0.159153	10.0891	12.2145	9.72498	10.5328	10.3093	10.7091
UBASH3B	Q8TF42	0.102443	-0.159741	12.383	10.5455	11.0479	10.9961	11.1099	11.3911
MYL12A;MYL12B;MYL12A	J3QRS3;O14950;P19105	2.07285	-0.159754	14.8328	14.7719	14.7601	14.601	14.6768	14.6077
CTNND1	A0A669KB05;A0A669KB62;C9JZR2;H0YC95;O60716;O60716-10;O60716-11;O60716-12;O60716-13;O60716-14;O60716-15;O60716-16;O60716-17;O60716-18;O60716-19;O60716-2;O60716-20;O60716-21;O60716-22;O60716-23;O60716-24;O60716-3;O60716-4;O60716-5;O60716-6;O60716-7;O60716-8;O60716-9	0.556432	-0.160254	14.4335	14.4837	14.0886	14.2197	14.1189	14.1864
ARGLU1	Q9NWB6	0.122828	-0.160624	16.2027	17.7044	16.4858	16.7469	16.7801	16.384
CCNB1	P14635;P14635-2	0.233242	-0.163358	13.7395	12.8721	13.1389	12.9734	13.2844	13.0027
CEP170	E5RFU8;E5RIH6;E5RJT5;Q5SW79;Q5SW79-2;Q5SW79-3	0.0867432	-0.164119	8.9856	10.934	10.8552	9.67184	10.2521	10.3585
SRXN1	Q9BYN0	0.25117	-0.164794	15.7316	16.0378	15.1808	15.6237	15.4219	15.4102
RPL9;RPL9P9	D6RAN4;P32969	0.13364	-0.165563	13.1143	13.2617	11.9322	12.4184	12.9572	12.4359
HSPA14	Q0VDF9	0.103578	-0.165704	12.8675	12.9827	12.227	12.0188	11.9835	13.5778
CASK	A0A2R8YE77;A0A2R8YEK3;A0A2R8YFN5;A0A2U3TZM1;A0A2U3TZM4;A0A2U3TZN6;A0A7I2RJN6;O14936;O14936-2;O14936-3;O14936-4;O14936-6;Q5JS79	0.22312	-0.165936	10.6541	10.3916	10.5341	10.7947	9.83644	10.4509
AHCY	P23526	0.49407	-0.167295	15.8668	16.2903	15.8766	15.9029	15.8806	15.7482
PITHD1	Q9GZP4;Q9GZP4-2	0.287347	-0.167428	15.7109	15.0205	15.1122	14.9297	15.2131	15.1985
PPP4R2	C9IZ04;Q9NY27	0.262208	-0.169293	13.8215	13.4752	14.3272	13.5927	13.6857	13.8377
RAB18	Q9NP72	0.623532	-0.169721	15.8463	15.895	15.5206	15.5356	15.6503	15.5668
SLC25A3	Q00325-2	1.18437	-0.170691	18.2306	18.3555	18.3201	18.1001	18.2413	18.0527
MCM7	P33993;P33993-3	0.587241	-0.170899	15.4095	15.1342	15.0879	14.8899	15.1744	15.0546
MTCH2	Q9Y6C9	0.668949	-0.171497	14.8429	14.7521	14.8095	14.4654	14.5776	14.847
MTHFD1	F5H2F4;P11586;V9GYY3	0.934204	-0.17336	15.1188	14.9794	14.8218	14.8172	14.808	14.7747
ERCC8	Q13216	0.304924	-0.175833	19.6934	19.7973	19.2329	19.1898	19.7091	19.2973
ATP5F1C	P36542;P36542-2	0.170296	-0.176476	12.6642	12.745	13.6892	13.0027	13.1286	12.4378
USP4	Q13107;Q13107-2	0.352403	-0.177219	12.2907	11.854	11.8983	11.5833	12.1219	11.8062
ANLN	Q9NQW6;Q9NQW6-2	0.235588	-0.177697	13.4205	13.4161	12.7359	13.1097	13.2836	12.6461
ATXN2L	H3BUF6;Q8WWM7;Q8WWM7-2;Q8WWM7-3;Q8WWM7-4;Q8WWM7-5;Q8WWM7-6;Q8WWM7-8;Q8WWM7-9	0.415817	-0.179852	14.6737	14.3426	14.2432	13.9909	14.4302	14.2989
GCLC	P48506	0.237458	-0.180158	14.218	13.3069	13.739	13.2922	13.7113	13.7199
PPIG	A0A7I2V4W3;A0A7I2V5Q5;A0A7I2V629;C9JN15;Q13427;Q13427-2	0.227745	-0.180205	13.9517	14.0941	13.1607	13.499	13.403	13.764
NDUFB9	A0A3B3IT57;A0A7I2V620;A0A7I2YQN0;E7EWZ0;E9PF49;E9PH64;Q9Y6M9	0.190248	-0.180217	12.6291	11.9284	13.1303	12.2196	12.5646	12.3628
PSME2	A0A087X1Z3;Q9UL46	0.571465	-0.182863	14.3398	14.0305	14.323	13.9643	14.2491	13.9312
NSUN3	Q9H649	0.462734	-0.182953	13.0192	13.2726	13.2546	13.1777	13.1189	12.7009
NIP7	J3QLW7;J3QRD6;J3QRR4;Q9Y221;Q9Y221-2	0.0726628	-0.184812	10.743	9.73395	9.40412	10.2403	8.22524	10.8611
ZG16B	A0A0C4DGN4;Q96DA0	0.0338706	-0.185523	9.67611	15.0155	9.54716	11.2329	10.4917	11.9576
PLPBP	O94903	0.772559	-0.186046	17.415	17.0536	17.1584	17.0769	17.0088	16.9832
WDR26	A0A499FIZ0;A0A7I2YQL3;A0A7I2YQQ9;A0A7P0SXD0;H0Y9R3;Q9H7D7;Q9H7D7-2	0.256055	-0.188461	11.2424	11.1296	10.4131	10.6556	11.0039	10.5603
KRT14	P02533	0.0963912	-0.188854	18.5647	19.662	20.4095	19.8938	18.458	19.7179
BUB3	J3QT28;O43684;O43684-2	0.822743	-0.189505	15.6191	15.4145	15.3283	15.3448	15.308	15.1405
HNRNPH2	P55795	0.603912	-0.189974	13.9748	13.9111	13.815	13.9473	13.487	13.6965
ZC3HAV1L	Q96H79	0.369244	-0.190454	15.996	15.3957	15.3579	15.3343	15.5167	15.3272
FASN	P49327	0.777197	-0.190654	19.6565	19.4435	19.3781	19.1887	19.4455	19.272
PLCG1	P19174;P19174-2	0.182741	-0.192135	13.8342	13.5292	13.158	13.5491	12.6273	13.7685
MRPL44	Q9H9J2	0.095996	-0.192248	9.99467	11.3407	10.6944	11.5179	9.4336	10.5016
CPNE7	Q9UBL6;Q9UBL6-2	0.411118	-0.19234	16.9445	16.503	16.3029	16.4095	16.4845	16.2794
OTUB1	F5GYJ8;F5GYN4;J3KR44;Q96FW1	0.489718	-0.1927	12.8373	13.3313	12.968	13.0056	12.7048	12.8481
ARL1	P40616;P40616-2	0.3276	-0.195205	12.8024	13.6169	13.0111	12.973	12.9089	12.9629
FARSA	Q9Y285	0.653794	-0.195603	17.388	17.1339	17.1431	16.829	17.0533	17.1958
NXN	Q6DKJ4	0.38086	-0.196297	13.6637	13.1592	13.0257	13.0654	13.262	12.9323
HCFC1	A6NEM2;P51610;P51610-2;P51610-4	0.655894	-0.197563	15.234	14.7983	14.9329	14.7016	14.8395	14.8314
FTSJ1	Q9UET6;Q9UET6-2	0.16216	-0.198204	14.8386	13.5668	14.0277	13.5442	14.4593	13.8349
UBE2M	P61081	0.429085	-0.198354	14.8529	14.9514	14.8155	14.7858	14.9404	14.2985
MYL6	F8W1R7;G3V1V0;P60660;P60660-2	0.584127	-0.198911	15.7465	15.6049	15.2415	15.2946	15.3327	15.3689
CACUL1	Q86Y37	0.509138	-0.198989	11.3204	11.0893	11.1721	11.1504	11.154	10.6805
TFB2M	Q9H5Q4	0.252873	-0.199747	13.1416	14.1544	13.3153	13.2947	13.351	13.3664
TUBB	P07437;Q5JP53	0.554876	-0.199948	19.6439	19.4351	19.1699	19.0554	19.3217	19.272
IMPDH2	A0A7I2V2T3;A0A7I2YQK5;E7ETK5;H0Y4R1;P12268	0.50765	-0.200038	15.0056	15.0673	15.3047	14.8317	15.2131	14.7327
DUT	H0YKC5;H0YNW5;P33316;P33316-2	0.676615	-0.200495	16.1231	16.366	15.9259	16.0232	15.9126	15.8777
HIGD1A	Q9Y241	0.15798	-0.200937	12.53	13.9535	13.5966	13.2952	12.7455	13.4366
WDR5	P61964	0.263629	-0.202653	13.1797	13.6994	12.916	13.3345	13.1868	12.6658
SPTLC1	O15269	0.429032	-0.203019	13.2908	13.3394	12.9656	12.9382	13.3054	12.7433
ST7	B7Z4L1;B7Z4U3;C9JRW1;C9JU30;E7ENZ9;E7EPD9;E7EPW5;E9PCV1;G3XAH9;H7BXS2;Q9NRC1;Q9NRC1-2;Q9NRC1-3;Q9NRC1-4;Q9NRC1-5;Q9NRC1-6;Q9NRC1-7	0.392014	-0.203412	17.1439	16.5497	16.9224	16.4043	16.8364	16.7651
KRTAP1-1;KRTAP1-3	Q07627;Q8IUG1	0.0140566	-0.203662	20.732	7.90821	10.007	11.6777	8.60871	17.7498
GEMIN2	A0A3B3IU42;G5EA29;H0YCF4;H0YDP6;H0YEL0	0.15605	-0.20478	12.3648	11.3807	12.4991	11.4899	11.5815	12.5588
RUVBL2	Q9Y230	0.916625	-0.205104	15.329	15.1929	15.4097	14.9806	15.263	15.0726
HNRNPDL	A0A087WUK2;O14979;O14979-2;O14979-3	0.0791082	-0.205447	12.6306	15.668	14.0612	14.4335	13.7226	13.5875
RUFY1	H0YA47;H0YAC8;Q96T51;Q96T51-2	0.179072	-0.206316	9.48563	10.7446	9.55711	9.6673	9.48039	10.0207
PPIL2	A0A7P0T843;A0A7P0T8E8;A0A7P0TA15;A0A7P0TAH4;A0A7P0TB19;A0A7P0Z4K4;Q13356;Q13356-2	0.13539	-0.207018	12.6949	13.5841	11.9084	12.1232	12.3583	13.0849
THOP1	P52888	0.776127	-0.208458	13.2197	13.4046	13.451	13.1892	13.3031	12.9577
ITGA6	P23229;P23229-2;P23229-3;P23229-4;P23229-5;P23229-6;P23229-7;P23229-9	0.0649148	-0.208869	10.0907	11.8816	8.40812	10.6048	10.2018	8.94712
RMND5A	Q9H871	0.203785	-0.209178	9.7739	9.90846	9.82979	9.76782	10.2306	8.88624
MTPAP	Q9NVV4-2	0.170337	-0.210227	11.6634	12.0744	11.6332	10.7222	12.2089	11.8092
RANBP2	P49792	1.56106	-0.21035	13.6571	13.7305	13.6129	13.4264	13.3859	13.5572
CAD	F8VPD4;P27708	0.790848	-0.210785	17.3383	17.0279	17.0495	16.8408	17.0698	16.8728
ILF3	Q12906;Q12906-7	0.48557	-0.210805	15.5778	15.7496	15.1177	15.262	15.26	15.2907
UNC45A	A0A1W2PNX8;Q9H3U1;Q9H3U1-2	0.661061	-0.21092	14.371	14.261	14.6559	14.2245	14.3606	14.0701
RRM2	P31350	0.321434	-0.211408	14.4745	15.2451	14.5761	14.4999	14.7829	14.3786
DCAF7	P61962	0.373498	-0.211931	14.2089	13.4811	13.6618	13.3963	13.7135	13.6063
UBE2I	B0QYN7;H3BPC4;H3BQQ9;P63279	0.299382	-0.212609	13.6299	14.2073	13.9467	13.2452	13.9401	13.9608
THNSL1	Q8IYQ7	0.0935668	-0.212783	10.3282	12.0304	12.7328	11.2627	12.2367	10.9537
CCDC160	A6NGH7	0.742069	-0.213179	16.1401	16.075	15.9892	15.7313	16.1036	15.7298
PRKAR1A	P10644	0.310303	-0.213442	12.5163	11.7089	11.9463	11.674	12.1351	11.722
EIF3B	P55884;P55884-2	0.581945	-0.214075	15.4661	15.9092	15.4984	15.5136	15.2507	15.4672
SNUPN	H3BQR0;H3BRI5;H3BSK1;H3BTA6;O95149	0.222268	-0.214589	11.4812	10.8408	11.448	11.4454	10.4235	11.2574
YBX1	H0Y449;P67809	0.203314	-0.215199	13.766	14.2941	13.0058	13.4824	13.1842	13.7536
NAXE	A0A7P0TAG8;Q8NCW5;Q8NCW5-2	0.300553	-0.215576	14.5989	13.769	14.2788	13.7106	14.015	14.2744
RPL22L1	C9JYQ9;H0Y8C2;Q6P5R6	0.226407	-0.216235	14.4411	15.2964	14.0496	14.4425	14.2525	14.4433
NOSIP	A0A075B6F9;Q9Y314	0.783685	-0.216382	15.2412	14.8445	15.0013	14.7205	14.8099	14.9075
TPX2	Q9ULW0;Q9ULW0-2	0.370462	-0.217748	14.8728	14.0656	14.2818	14.1347	14.2854	14.1468
VIRMA	Q69YN4;Q69YN4-2;Q69YN4-3;Q69YN4-4	0.140924	-0.218143	10.5368	11.0386	10.7417	9.99531	10.0043	11.6631
CPSF1	Q10570	0.279126	-0.218615	12.3251	12.0597	11.5575	11.5459	11.5377	12.2029
ECPAS	A0A804HJA4;J3KN16;Q5VYK3	0.204779	-0.219067	21.1209	19.8789	19.9691	20.2803	19.9191	20.1123
PFN2	G5E9Q6;P35080-2	0.415086	-0.219702	19.5137	19.5021	18.8899	18.9379	19.0584	19.2503
KIF23	A0A2U3TZL8;A0A7I2V5Y5;H7BYN4;Q02241;Q02241-2	0.338211	-0.220047	14.8551	15.3315	14.6143	14.473	15.0342	14.6335
CYB5B	D6RFH4;H3BUX2;O43169	0.0671236	-0.220507	9.19827	10.8813	12.9836	10.6406	10.3112	11.4498
COMT	P21964;P21964-2	0.215156	-0.222393	12.5758	12.209	11.3914	11.4731	11.886	12.15
ERO1A	Q96HE7	0.385456	-0.222415	14.3237	15.0517	14.3741	14.2795	14.3189	14.4838
RPL22;;RPL22;RPL22;RPL22;RPL22;RPL22	K7EJT5;K7EKS7;K7ELC4;K7EMH1;K7EP65;K7ERI7;P35268	0.184864	-0.222691	15.2689	16.4416	14.9688	15.2025	15.2844	15.5243
MSH2	P43246	0.576622	-0.222709	14.6894	14.2346	14.5721	14.1353	14.4811	14.2116
PSMC3	E9PKD5;E9PM69;P17980;R4GNH3	0.365573	-0.224045	13.5796	13.7348	14.116	13.8646	13.1972	13.6965
CLIC1	O00299	0.222294	-0.225563	13.6019	13.9442	13.672	12.7909	13.6614	14.0892
USP10	Q14694;Q14694-2;Q14694-3	0.686961	-0.225728	14.3571	14.0777	14.1798	13.7292	14.0896	14.1186
WRAP73	A0A0A0MRV3;Q9P2S5	0.359558	-0.226719	13.8513	12.9671	13.3037	13.1681	13.2248	13.049
PDP1	Q9P0J1;Q9P0J1-2	2.27164	-0.227094	14.2	14.0803	14.0969	13.8637	13.9181	13.9141
TKT	A0A0B4J1R6;P29401;P29401-2	1.4767	-0.227106	15.0452	14.8401	15.0059	14.7038	14.7021	14.804
CSK	P41240	0.609763	-0.227354	16.4364	15.9592	16.0541	15.7642	16.0378	15.9656
CARM1	Q86X55;Q86X55-1	0.511982	-0.227849	15.9773	15.9774	15.9323	15.8561	15.9936	15.3537
SEC23IP	Q9Y6Y8;Q9Y6Y8-2	0.248721	-0.227986	12.9102	11.7107	12.6107	12.136	12.1438	12.2678
MCM5	P33992	1.07185	-0.229801	16.2976	16.5612	16.2927	16.2055	16.1983	16.0584
COASY	Q13057;Q13057-2	1.57413	-0.230174	14.4416	14.4141	14.4215	14.2009	14.0775	14.3084
PIK3R2	E9PFP1;O00459	0.272029	-0.230397	13.8917	13.5313	12.9141	12.919	13.5515	13.1754
STK39	Q9UEW8;Q9UEW8-2	0.384154	-0.230527	14.9469	15.2081	14.6326	15.0321	14.3743	14.6895
TK1	P04183	1.19443	-0.23097	17.3014	17.2997	17.2562	17.0099	17.2276	16.9269
DCUN1D5	E9PM04;Q9BTE7	1.10618	-0.232137	13.8782	14.0589	13.9328	13.6405	13.8903	13.6427
ELAVL1	Q15717;Q15717-2	0.267929	-0.233374	15.4947	16.5889	15.6644	15.7657	15.531	15.7511
PSMA5	P28066	0.0791871	-0.233653	9.71355	12.8137	11.65	11.6072	11.7373	10.1318
TMEM33	P57088	0.229505	-0.23385	13.7989	14.9187	13.8599	14.1982	13.6421	14.0356
BAIAP2L1	Q9UHR4	0.270941	-0.234048	13.2058	12.064	12.9075	12.3983	12.5823	12.4947
DNPEP	E5RIA4;E7ETB3;Q9ULA0;Q9ULA0-2	0.365623	-0.235792	17.1618	17.9653	17.2415	17.1997	17.3773	17.0842
PRDX1	Q06830	0.641457	-0.237214	20.2512	19.7113	19.8712	19.615	19.7369	19.7702
RIPK1	Q13546	0.64041	-0.239802	13.5405	13.785	13.3759	13.4546	13.0873	13.4401
PEF1	Q9UBV8	0.229616	-0.241451	17.0336	18.1902	16.9303	17.2589	17.1856	16.9851
APIP	Q96GX9	1.83424	-0.244059	14.4928	14.6234	14.517	14.2135	14.3358	14.3517
FLAD1	Q5T196;Q8NFF5;Q8NFF5-2;Q8NFF5-3	0.896202	-0.244599	12.8784	12.7553	12.5426	12.6232	12.4771	12.3423
POLR1C	A0A2R8Y5D3;A0A2R8YEY5;A0A2R8YEZ4;O15160;O15160-2	0.181646	-0.245987	12.5209	11.3938	11.7178	11.6504	12.3007	10.9434
DDX1	A0A087WZ71;A0A087X2G1;A0A7I2V2M5;A0A7I2V430;A0A7I2V4F0;Q92499;Q92499-2;Q92499-3	1.06469	-0.246435	14.029	14.1514	13.9316	13.8178	13.9285	13.6263
PGK1	P00558;P00558-2	0.0767695	-0.247581	10.7271	11.6622	13.113	12.3725	9.79545	12.5916
MARS2	Q96GW9	0.355818	-0.247705	14.32	13.4315	13.9717	13.3991	13.7726	13.8085
PSMG1	F8WBH7;O95456;O95456-2	0.0939928	-0.2479	13.527	10.84	13.5361	11.9505	12.2823	12.9266
GNA13	Q14344;Q14344-2	0.130135	-0.248	11.1406	12.9092	12.5269	12.5081	12.2676	11.057
NCDN	Q9UBB6;Q9UBB6-2;Q9UBB6-3	0.180707	-0.248199	11.9761	11.4622	11.5812	11.4199	12.2918	10.5632
KIF22	H3BRB3;Q14807;Q14807-2	0.688615	-0.248485	14.9677	14.9877	14.7001	14.7661	14.7783	14.3657
FOCAD	Q5VW36;S4R400	0.303592	-0.248566	10.5695	10.4953	9.75196	10.05	10.3683	9.65264
SRSF10	O75494;O75494-2;O75494-3;O75494-4;O75494-5;O75494-6;Q5JRI1	0.388032	-0.248599	15.1617	15.3086	14.5071	14.7349	14.9394	14.5574
MOCS2	O96007	0.678304	-0.24869	13.7511	13.3371	13.2593	13.1801	13.3249	13.0964
GCAT	O75600;O75600-2	0.389654	-0.250083	14.7993	13.9084	14.2725	13.9832	14.2353	14.0115
H1-4	P10412	0.239231	-0.250482	15.5262	16.7632	15.6189	15.8389	15.5011	15.8169
IRS1	P35568	1.03543	-0.250507	14.941	14.8111	14.6074	14.6122	14.5761	14.4198
PPME1	Q9Y570;Q9Y570-4	0.191054	-0.250533	12.6035	11.752	12.6105	11.2743	12.2793	12.6609
RNPEP	A6NKB8;Q9H4A4	1.01839	-0.250604	15.457	15.1853	15.1402	15.1287	14.9405	14.9614
PPIH	O43447	1.36799	-0.250739	14.0572	13.8191	13.9387	13.6136	13.6636	13.7854
UNC13B	A0A1B0GUS7	0.230431	-0.251638	13.3238	12.1689	13.3811	12.436	12.6761	13.0068
TMOD3	H0YKU1;H0YNJ8;Q9NYL9	0.138728	-0.253635	11.1672	9.97412	9.46766	9.9941	10.7068	9.14724
BAG2	O95816	0.506873	-0.253693	14.173	13.998	13.5898	13.4148	13.8752	13.7097
AIP	A0A804HKH9;O00170	0.991591	-0.254478	15.6254	15.7831	15.8708	15.6962	15.4352	15.3845
NAE1	J3KRK3;J3QRA5;Q13564;Q13564-2;Q13564-3;Q13564-4	0.214746	-0.254929	11.9416	12.7969	11.8262	12.62	11.6474	11.5325
MIF	P14174	0.410731	-0.254959	23.6486	23.0037	22.8587	22.7675	23.1135	22.8652
ANXA2	P07355	1.56575	-0.255776	19.9945	19.8534	19.8238	19.5756	19.7418	19.587
MVB12A	Q96EY5;Q96EY5-2	1.12834	-0.257735	14.8763	14.5327	14.6317	14.4606	14.3559	14.451
CSNK2A1;CSNK2A1;CSNK2A1;CSNK2A1;CSNK2A3	A0A2R8YD58;A0A2R8YF43;E7EU96;P68400;Q8NEV1	0.780418	-0.257964	15.3661	15.0639	15.1365	14.874	14.7535	15.1652
;TUBB3	A0A0B4J269;Q13509	0.294699	-0.258473	14.5471	13.5359	13.5553	13.3885	13.7999	13.6745
AP3S1	Q92572	0.638738	-0.258984	14.9583	14.4308	14.6558	14.2974	14.3491	14.6215
CLTC	A0A087WVQ6;Q00610;Q00610-2	1.02862	-0.261597	17.1835	16.8954	17.0176	16.6001	16.8649	16.8467
RNF114	A0A096LNV3;A0A096LP02;Q9Y508;Q9Y508-2	0.430639	-0.261998	12.5195	12.5679	11.7901	12.1224	12.0678	11.9014
HSPBP1	Q9NZL4;Q9NZL4-3	1.1392	-0.262431	14.2723	14.4559	14.2242	14.0879	14.178	13.8992
SLC25A5	P05141	0.261098	-0.262518	17.0933	18.4064	17.3852	17.3608	17.289	17.4476
TRIP6	Q15654	0.430651	-0.26252	13.1888	12.8576	12.448	12.8635	12.4559	12.3874
ISOC1	Q96CN7	0.82014	-0.263364	16.4058	16.5001	16.108	15.9	16.2021	16.1218
PKN1	K7EKY9;K7EM57;Q16512;Q16512-2;Q16512-3	0.241033	-0.263575	12.0553	12.3618	12.6361	11.4979	11.921	12.8435
GSR	P00390-2	0.908313	-0.263851	17.2953	16.8872	17.0094	16.678	16.8507	16.8716
UCK2	A0A2R8Y653;Q9BZX2	0.761046	-0.264909	14.627	14.2966	14.1308	14.2015	14.0856	13.9727
PSMD5	F2Z3J2;Q16401;Q16401-2	0.178313	-0.264922	10.3379	12.2482	11.3924	10.8548	11.0734	11.2555
CIAO2B	Q9Y3D0	1.36558	-0.266072	13.6697	13.4113	13.4419	13.183	13.2223	13.3193
CAPN1	P07384	0.433022	-0.266721	14.3825	14.5422	13.8055	14.056	13.7054	14.1687
VRK2	Q86Y07;Q86Y07-2;Q86Y07-3;Q86Y07-4;Q86Y07-5	1.04866	-0.267276	15.9986	15.7031	15.7943	15.4328	15.7148	15.5467
ACTR3	P61158	0.591368	-0.268016	15.2273	14.5861	15.0382	14.5489	14.7165	14.7821
FARSB	Q9NSD9	0.508315	-0.268642	17.7036	18.2477	17.5099	17.6844	17.5188	17.4522
CTBP2	P56545;P56545-2;P56545-3	0.272575	-0.270565	14.9933	13.8005	13.8783	14.0149	13.7589	14.0867
EFHD2	Q96C19	0.199474	-0.272661	13.6913	14.6723	13.1774	13.5944	14.068	13.0606
LSM14A	Q8ND56;Q8ND56-2;Q8ND56-3	0.181505	-0.272916	13.6222	13.6732	12.0021	12.8921	13.07	12.5168
PDE12	Q6L8Q7;Q6L8Q7-2	0.447877	-0.273005	15.8212	14.9956	15.2903	14.9425	15.0566	15.2889
FAM120A	Q9NZB2;Q9NZB2-6	0.376322	-0.274293	13.1524	13.3794	12.7316	13.1237	12.9751	12.3417
SMURF2	Q9HAU4	0.78682	-0.27446	13.7478	13.9964	13.9247	13.3927	13.8821	13.5707
IGHA2;IGHA1;IGHA1	A0A0G2JMB2;A0A286YEY1;P01876	0.111677	-0.274885	12.7762	15.5265	14.0561	14.5729	13.175	13.7863
RFC4	C9J8M3;C9JZI1;P35249;P35249-2	0.348977	-0.275146	13.4761	12.6103	13.1749	12.5249	13.2128	12.6982
EIF5A	I3L397;I3L504;P63241	1.21451	-0.276432	15.9463	16.2413	15.9097	15.7152	15.7804	15.7724
C2orf69	Q8N8R5	0.967762	-0.277446	14.3046	13.8586	14.0861	13.8489	13.7296	13.8385
PDS5A	Q29RF7	1.0336	-0.279082	13.7412	13.519	13.576	13.5394	13.2844	13.1752
ZC3H15	Q8WU90	0.154254	-0.280118	13.115	10.9142	12.5483	12.2102	11.8653	11.6618
LUC7L2	Q9Y383	0.181055	-0.280172	15.5562	17.0633	15.1354	15.6815	15.724	15.5089
MRPS27	G5EA06;Q92552;Q92552-2	0.223021	-0.280561	13.9145	14.0195	12.62	13.3416	12.857	13.5138
CUTA	C9IZG4;O60888;O60888-2;O60888-3	0.129576	-0.280835	10.4183	12.3675	12.9347	11.6545	11.2142	12.0092
TXLNG	Q9NUQ3	0.614767	-0.280991	13.4733	13.9529	13.5921	13.5654	13.5083	13.1016
PSMB3	A0A087WUL2;A0A087WXQ8;A0A087WY10;P49720	0.287265	-0.282723	12.0052	12.7748	13.0521	12.8165	12.1064	12.061
RSRC2	Q7L4I2;Q7L4I2-2	0.5128	-0.284781	15.5517	15.4346	14.7774	14.917	14.9575	15.0348
EARS2	Q5JPH6	0.771042	-0.287018	13.0667	13.1654	12.9247	13.0344	12.7693	12.4921
COX17	Q14061	0.361643	-0.288879	16.4299	16.4815	15.5314	16.0223	15.9428	15.611
CDC20	Q12834	0.739021	-0.289024	14.3918	14.0206	13.8284	13.8019	13.906	13.6659
SH3GL1	Q99961	0.94558	-0.289955	15.3619	15.5289	15.0622	15.0784	15.0648	14.9399
IDE	A0A3B3ISG5;A0A7I2V2P6;A0A7I2V3E3;A0A7I2V610;P14735	0.222597	-0.290175	13.0972	14.6576	14.3011	14.0357	13.768	13.3817
SSRP1	Q08945	0.981113	-0.290544	14.6453	14.6258	14.2968	14.2767	14.0758	14.3438
KDM3B	Q7LBC6	0.318198	-0.291212	13.2972	13.4905	12.4958	13.0297	12.3662	13.014
ATG9A	H7C1G6;Q7Z3C6;Q7Z3C6-2	0.243749	-0.291839	11.1461	11.4805	11.6672	10.9571	11.9896	10.4716
TOP1	P11387	0.364732	-0.291959	14.2782	15.0239	14.0373	14.1479	14.4237	13.8919
METTL2A	Q96IZ6	0.300982	-0.292797	15.0165	13.7361	14.7466	14.2546	14.291	14.0753
CARHSP1	Q9Y2V2	0.338666	-0.292866	15.5949	16.2528	15.1521	15.6274	15.4145	15.0793
RELA	A0A087X0W8;E9PKH5;Q04206;Q04206-2;Q04206-3;Q04206-4;Q2TAM5	1.00933	-0.29311	14.2045	13.7659	14.1151	13.7712	13.7495	13.6854
DSG2	Q14126	0.369447	-0.294119	12.8516	12.1667	12.6822	11.934	12.7878	12.0963
MAP1S	Q66K74;Q66K74-2	0.447487	-0.29446	12.5987	12.1458	11.9279	11.5826	12.2844	11.9219
EIF2AK2	A0A7P0TBA9;A0A7P0Z4M0;P19525	0.353479	-0.295311	12.0556	13.0905	12.2873	12.3401	12.3236	11.8838
GRSF1	F5H5I6;H0Y8R1;H0YAK1;Q12849;Q12849-5	0.556755	-0.295596	13.4085	13.3317	13.1774	12.5971	13.3728	13.0609
SRSF6;SRSF6;SRSF6;;SRSF6;SRSF6	A0A590UJK4;A0A590UJP7;A0A590UK01;A0A590UK80;Q13247;Q13247-3	0.288235	-0.296087	17.6359	17.8005	16.6648	16.6438	17.3405	17.2286
NRDC	O43847;O43847-2	1.22086	-0.299161	14.2207	14.3258	14.0505	13.7761	14.0564	13.867
POLR3K	Q9Y2Y1	1.0102	-0.300816	14.2825	14.7589	14.5816	14.2673	14.2186	14.2347
DPYSL2	A0A1C7CYX9;Q16555;Q16555-2	1.29627	-0.301511	14.2394	13.9126	14.0859	13.7324	13.7146	13.8864
TELO2	H3BRS3;Q9Y4R8	0.254356	-0.301854	11.4168	11.6991	11.5553	10.8134	12.1833	10.769
NUP107	P57740	1.37729	-0.30206	12.8854	12.7382	12.6636	12.6072	12.4371	12.3367
CACYBP	Q9HB71	1.19892	-0.3022	14.7625	14.6507	14.4724	14.447	14.365	14.1671
SPRYD7	Q5W111;Q5W111-2	0.441263	-0.302865	13.8715	13.1495	13.1907	13.4528	12.9812	12.8691
TRIM65	Q6PJ69	0.637429	-0.30302	15.1551	14.9454	14.5384	14.6622	14.3492	14.7184
SEC16A	A0A3F2YNX0;A0A3F2YNZ0;F1T0I1;O15027;O15027-2;O15027-3;O15027-4;O15027-5	0.805993	-0.30322	14.2088	14.8005	14.4207	14.2004	14.1794	14.1406
SMU1	Q2TAY7	0.296188	-0.303373	12.9944	14.0986	12.8749	13.307	12.892	12.8588
SRSF5	Q13243;Q13243-3	0.11925	-0.303643	12.1082	14.9564	12.5832	13.4338	12.4267	12.8764
THUMPD3	Q9BV44	0.796894	-0.304217	16.1336	15.7126	15.5906	15.3822	15.5878	15.5541
HSP90AB1	P08238	1.44828	-0.305517	17.4863	17.601	17.4979	17.0516	17.2554	17.3617
PDSS2	Q86YH6	0.241943	-0.30596	11.5514	10.3339	11.5413	10.7021	11.3964	10.4101
AHNAK	Q09666	0.642875	-0.307557	13.4838	13.4177	13.9418	13.1496	13.5854	13.1857
RPN2	P04844;P04844-2	0.853721	-0.308219	14.2082	14.2927	14.4172	14.067	14.2274	13.699
LETM1	O95202	0.125535	-0.309114	10.8661	13.199	10.6734	11.3754	10.544	11.8916
SHC1	P29353;P29353-2;P29353-3;P29353-6;P29353-7	0.972937	-0.309399	15.6184	15.6553	15.2912	15.1194	15.3999	15.1174
LDHA	F5GXY2;F5GYU2;P00338;P00338-2;P00338-5	0.17681	-0.310368	12.4163	13.4539	13.836	12.7673	12.1245	13.8833
ID1	P41134	0.232937	-0.311695	12.6772	12.3362	11.6582	12.7707	11.4055	11.5603
KRT8	P05787;P05787-2	0.933513	-0.31254	14.9654	15.0498	14.9825	14.7786	14.3854	14.896
RFC2	P35250	2.294	-0.313513	13.3094	13.2668	13.4498	13.008	13.036	13.0415
RRP1	P56182	0.246367	-0.315164	12.7718	14.1693	12.9361	13.421	12.5638	12.9468
MARS1	P56192	0.443103	-0.315444	14.3104	13.277	13.8121	13.4092	13.6176	13.4264
SRPRA	P08240;P08240-2	0.282214	-0.315777	11.9177	13.3118	12.5256	12.6611	11.9979	12.1488
NOM1	Q5C9Z4	0.301205	-0.316148	9.82543	11.0551	10.6528	9.76893	10.5377	10.2782
DLAT	A0A7P0T997;A0A7P0TA47;A0A7P0TAG1;A0A7P0TAX2;A0A7P0TBE2;A0A7P0TBK2;A0A7P0Z4G4;E9PEJ4;H0YDD4;P10515	0.233974	-0.316523	11.7783	13.3314	12.6777	12.5343	12.5879	11.7155
ALYREF	Q86V81	0.121926	-0.318702	14.7221	16.8857	14.4018	16.0082	14.1082	14.9371
CPNE3	O75131	0.921751	-0.319078	14.2864	14.6515	14.4976	14.1974	14.3496	13.9312
SET;SETSIP;SET;SET;SET;SET	A0A0C4DFV9;P0DME0;Q01105;Q01105-2;Q01105-3;Q01105-4	0.0987548	-0.321554	11.7755	13.7634	9.81383	11.081	11.9344	11.3728
ASCC3	Q8N3C0	0.208013	-0.322082	9.57185	10.8611	9.26569	8.99148	9.5499	10.191
CAMK2D	D6R938;E9PBG7;E9PF82;Q13557;Q13557-10;Q13557-11;Q13557-12;Q13557-3;Q13557-4;Q13557-5;Q13557-6;Q13557-8;Q13557-9	0.356402	-0.323923	10.0214	11.1806	10.2499	10.1311	10.402	9.9471
PABPC4	A0A7I2V4L7;B1ANR0;Q13310;Q13310-2;Q13310-3	0.439617	-0.324943	13.7732	14.7223	13.8111	13.8495	13.8358	13.6464
FN3K	Q9H479	0.232838	-0.324964	17.5979	16.1128	15.8607	16.0691	16.1816	16.3458
PLD3	Q8IV08	0.353556	-0.325193	13.9389	14.9776	13.9795	14.2157	13.6319	14.0729
ITGB1	A0A7I2V2F9;A0A7I2V348;C9JPK5;E7EUI6;H7C4K3;P05556;P05556-2;P05556-3;P05556-4;P05556-5	0.894128	-0.325444	12.4772	12.4662	12.9552	12.2168	12.4006	12.3049
CARMIL1	Q5VZK9;Q5VZK9-2	0.726211	-0.325545	12.2663	12.4218	11.8728	11.8743	12.0699	11.6402
LPCAT1	A0A0G2JQ62;Q8NF37	0.867758	-0.326236	12.0291	11.6965	12.2355	11.712	11.7611	11.5092
FSCN1	Q16658	0.415335	-0.326618	14.3363	13.9463	13.2102	13.4104	13.5032	13.5994
INPP4A	Q96PE3;Q96PE3-2;Q96PE3-3;Q96PE3-4	0.759921	-0.328159	13.2112	12.7945	12.7564	12.7532	12.3243	12.7001
PRPF6	O94906;O94906-2	0.554601	-0.330278	13.4257	13.2569	12.789	12.9201	12.4745	13.0861
FBXL18	H0Y6I6;Q96ME1;Q96ME1-2;Q96ME1-4	0.393288	-0.330929	11.9245	11.686	12.1866	11.1778	12.2391	11.3874
UBE2D3	A0A087WY85;D6RAH7;H9KV45;P61077;P61077-2;P61077-3	0.25444	-0.331425	10.8606	10.2835	9.20449	10.0244	9.89566	9.43429
TUBA1C	F5H5D3;Q9BQE3	0.602618	-0.331931	16.0144	15.2691	15.8632	15.2331	15.5608	15.357
PLIN3	O60664;O60664-3;O60664-4	1.04635	-0.332256	15.3055	15.2284	15.0066	14.7306	15.0864	14.7267
RTF2	Q9BY42	0.130079	-0.332754	14.3862	11.8417	11.7035	12.8179	12.4763	11.6388
POLR1G	O15446;O15446-2	0.474099	-0.332985	14.2999	13.6831	14.5356	13.8015	13.5703	14.1479
TSNAX	Q99598	0.160636	-0.333345	13.1468	10.7225	12.6874	11.5975	11.6411	12.3181
IRAK1	D3YTB5;H7C224;H7C2I6;P51617;P51617-2;P51617-3;P51617-4	0.302232	-0.334161	12.0237	11.7421	11.9356	12.0754	11.9373	10.6862
MTMR14	C9JSR1;Q8NCE2;Q8NCE2-2;Q8NCE2-3	0.266816	-0.33421	11.832	10.5704	10.5489	10.4871	11.1695	10.2919
RBBP4	Q09028;Q09028-3	1.45513	-0.336013	15.0309	14.8535	15.0816	14.7063	14.4917	14.76
ACTB	P60709	1.10859	-0.336133	17.2785	16.9979	17.1365	16.5668	16.9185	16.9192
PMPCB	G3V0E4;O75439	0.728499	-0.338531	13.7691	13.0531	13.5263	13.1668	13.0527	13.1134
VBP1	P61758;P61758-2	0.347796	-0.339474	13.9968	14.8099	13.9702	14.1428	14.2838	13.3318
HACD3	Q9P035	0.177387	-0.340316	10.3567	12.3853	11.9179	11.9501	11.0807	10.6082
IPO4	Q8TEX9;Q8TEX9-2	2.01091	-0.340344	13.2804	13.494	13.4557	13.0829	13.1183	13.0079
LAMTOR5	A0A0C4DGV4;E9PLX3;O43504;R4GMU8	0.564871	-0.342489	13.9211	13.0942	13.7349	13.0608	13.4021	13.2599
SRP19	A0A087WWU9;A0A2U3TZN1;P09132;P09132-2	0.208527	-0.343411	9.76729	10.4186	11.07	10.9647	9.18146	10.0794
GTF3C3	A0A494C1S7;H7C143;Q9Y5Q9;Q9Y5Q9-2	0.175252	-0.344707	12.2334	11.5492	9.75901	10.9659	10.6179	10.9236
HSDL2	Q6YN16	0.890995	-0.346966	14.0312	13.868	13.8325	13.683	13.7812	13.2266
CPSF6	F8WJN3;Q16630;Q16630-2;Q16630-3	0.130913	-0.346982	13.5172	16.5447	13.8883	14.7052	14.121	14.0831
SAP18	O00422;O00422-2	0.433802	-0.347226	16.0625	16.7668	15.6099	15.6843	15.9076	15.8056
ARPC3	C9JZD1;F8VR50;O15145	0.85383	-0.349044	15.4829	15.8707	15.4443	15.4942	15.2177	15.0388
PRMT5	O14744	1.58459	-0.34925	15.2215	15.1936	15.1906	14.8308	15.037	14.6902
COPA	A0A3B3IS84;A0A3B3ISC6;P53621	1.22363	-0.349563	15.4986	15.2835	15.3179	14.7971	15.0611	15.1932
ACLY	P53396	2.07958	-0.350333	15.7869	15.5681	15.7071	15.2922	15.4028	15.3161
SMARCA5	O60264	0.292616	-0.352008	12.9809	14.392	13.1543	13.1327	12.8246	13.5138
DDX5	J3KTA4;P17844	0.523398	-0.352099	17.5418	18.392	17.4873	17.5334	17.4354	17.396
HNRNPA3	A0A7I2V2R3;A0A7I2V5D8;P51991	0.916	-0.352794	15.2704	15.7157	15.1756	15.051	14.9092	15.1431
SMAD2	B7Z5N5;K7EJX0;K7EL92;K7ERC7;K7ESI8;Q15796;Q15796-2	0.285666	-0.353868	12.104	12.7694	11.9121	11.2995	11.6932	12.7312
SAFB	Q15424;Q15424-2;Q15424-3;Q15424-4	0.729055	-0.353954	13.9167	13.5738	13.3223	13.174	13.5228	13.0541
FARS2	A0A3B3ITR6;O95363	0.590892	-0.35461	13.7339	12.9632	13.3442	12.696	13.1059	13.1756
HSD17B10	Q99714	0.936243	-0.354712	16.8501	16.3232	16.4756	16.0352	16.3133	16.2363
CLP1	E9PL17;Q92989	0.785863	-0.35551	13.9633	13.7375	13.6761	13.3092	13.8098	13.1913
THUMPD1	H3BNW0;Q9NXG2	0.171544	-0.35575	12.5467	11.016	11.6711	11.5946	12.3925	10.1795
EEF1B2	P24534	0.694195	-0.355969	13.8951	14.4947	14.3396	13.6428	13.8608	14.1579
CSNK2A2	P19784	0.078729	-0.356327	9.81927	13.3701	14.5893	13.5883	11.9122	11.2092
MAP4	A0A804HKE7;E7EVA0;P27816;P27816-6	0.952478	-0.357637	15.9445	16.0898	15.5811	15.4675	15.6869	15.388
CDK6	Q00534	0.728962	-0.358327	15.8934	15.4857	15.6885	14.958	15.5961	15.4386
COPB2	H0Y938;H0YAC7;P35606;P35606-2	1.10321	-0.358825	14.6998	14.528	14.7474	14.0248	14.452	14.4219
PFDN6	A2AB88;O15212	0.236052	-0.359092	13.4155	14.2225	13.197	12.36	14.1283	13.2695
STRAP	Q9Y3F4;Q9Y3F4-2	0.605607	-0.359411	13.8954	14.4789	14.524	13.7855	13.7502	14.2844
TSR1	Q2NL82	0.787385	-0.363423	13.228	13.5863	13.2399	13.2551	12.6516	13.0572
EIF4A1	P60842	1.21409	-0.3662	16.1411	16.3767	15.9358	15.6965	15.7536	15.9048
RPS6KA4	A0A0A6YYC0;E9PJN1;O75676;O75676-2	0.599881	-0.366651	14.1137	13.7727	13.8682	13.0588	13.6906	13.9052
HERC4	Q5GLZ8;Q5GLZ8-2;Q5GLZ8-3;Q5GLZ8-6	0.385457	-0.366975	9.7847	10.7868	9.93328	9.47523	9.63316	10.2955
SFXN1	Q9H9B4	0.162489	-0.367114	14.0341	11.3901	13.6646	12.2728	12.8351	12.8797
KRT5	P13647	0.210729	-0.367959	20.1929	21.5551	22.1373	21.4908	20.2709	21.0198
XRCC6	B1AHC9;P12956	0.77632	-0.368471	15.3376	15.9185	15.2265	15.2041	15.0579	15.1152
YWHAQ	P27348	0.376888	-0.368697	14.3854	14.8586	14.6064	14.4852	13.4914	14.7678
EIF2B1	Q14232	0.465122	-0.369776	13.2756	12.4358	12.9487	12.8155	12.6971	12.0382
RPL36AL	Q969Q0	1.34684	-0.370127	14.386	14.5992	14.6619	14.2592	13.9845	14.293
FOXK1	P85037	0.634341	-0.370967	14.5247	13.8663	13.9326	13.7707	13.444	13.996
ANXA13	E5RIN3;P27216;P27216-2	0.658195	-0.371309	20.1971	19.4083	19.8126	19.2395	19.6398	19.4248
CSNK2B	P67870;Q5SRQ6	0.697677	-0.371785	12.6538	13.2161	12.5007	12.6184	12.2471	12.3899
PPP1CC	F8VR82;F8VYE8;P36873;P36873-2	0.722642	-0.37258	12.3442	13.1538	12.723	12.4114	12.3082	12.3837
IARS1	A0A0A0MSX9;A0A804HJN6;P41252	1.12478	-0.372808	15.3921	15.0027	15.4487	14.8239	14.858	15.0433
AMMECR1	Q9Y4X0	0.682297	-0.372968	13.7909	13.3497	13.7908	13.3829	13.548	12.8816
RNH1	P13489	0.622349	-0.374943	13.5813	13.1921	13.4026	12.7789	12.7623	13.5099
PSMC5	P62195;P62195-2	1.16905	-0.37671	13.6298	13.8751	13.6603	13.1098	13.3652	13.5601
ABCF3	Q9NUQ8;Q9NUQ8-2	0.545034	-0.378301	15.273	14.3594	14.6929	14.3052	14.6923	14.1929
CISD2	D6RCF4;Q8N5K1	0.450283	-0.378324	13.2828	12.9219	12.6006	12.8765	11.9505	12.8433
PPP2CB;PPP2CA	P62714;P67775	0.295802	-0.378912	13.7204	15.3146	14.1046	14.348	13.9905	13.6644
HSP90AA1	P07900;P07900-2	1.19716	-0.379043	15.0177	15.3826	15.1489	14.6516	14.7584	15.0022
PSMA4	H0YL69;H0YMZ1;H0YN18;P25789	2.27875	-0.379272	13.5674	13.7192	13.5445	13.3123	13.1757	13.2053
NPM1	A0A7I2YQC0;P06748;P06748-2	0.245875	-0.379484	15.496	17.2377	15.4037	15.8426	15.4162	15.7402
EEF1G	P26641	0.805152	-0.380278	15.2754	15.7373	15.2717	14.91	14.8777	15.3559
GRB2	P62993	0.46248	-0.382068	15.154	16.0273	14.9761	15.2795	14.959	14.7727
PMPCA	Q10713;Q10713-2;Q5SXN9	0.549648	-0.382135	12.9829	13.5544	12.7039	12.7591	12.9733	12.3625
UBE2D2	P62837	1.28346	-0.382258	16.5667	16.4013	16.8096	16.3408	16.2047	16.0853
AAAS	F8VZ44;H3BU82;Q9NRG9	1.04612	-0.383517	13.9893	14.4738	14.5259	13.9063	13.9816	13.9506
DBNL	H0Y5J4;Q9UJU6;Q9UJU6-5	0.602113	-0.386443	12.44	12.1549	12.1941	11.4949	12.4061	11.7287
OGT	O15294	0.891921	-0.386548	15.3645	14.7427	14.938	14.6228	14.7774	14.4854
USP39	A0A087X1B2;B9A018;Q53GS9;Q53GS9-2	0.305324	-0.387819	11.9428	13.3687	11.7418	12.0043	12.0638	11.8217
ATP5F1B	P06576	0.877851	-0.387949	14.7917	14.7228	15.0689	14.1657	14.4767	14.7772
SNAP23	H3BM38;H3BNE1;H3BPJ0;H3BR18;O00161;O00161-2	0.263003	-0.389578	12.4359	12.0293	10.6392	10.9035	11.3292	11.7029
PAXX	Q9BUH6	1.55358	-0.389585	15.0377	15.2506	15.0012	14.7766	14.5371	14.807
HLA-A;HLA-A;HLA-A;HLA-C;HLA-C;HLA-C;HLA-A;HLA-C;HLA-A;HLA-A;HLA-C;HLA-A;HLA-A;HLA-A;HLA-A;HLA-A	A0A0G2JI36;A0A0G2JIF2;A0A0G2JL56;A0A140T912;A0A140T930;A0A140T937;A0A1W2PQD0;A0A1W2PRZ0;A0A1W2PS24;A0A1W2PSE7;O78179;P04439;P04439-2;Q5SRN5;Q5SRN7;Q5SUL5	0.74496	-0.389907	14.9547	15.6576	15.0605	14.9387	14.636	14.9283
SLC3A2	A0A7P0T9F7;A0A7P0TAN7;A0A7P0TBF8;A0A7P0Z4A0;A0A7P0Z4P5;F5GZI0;F5GZS6;F5H056;J3KPF3;P08195;P08195-2;P08195-3;P08195-4	0.421348	-0.390179	13.7607	15.0023	14.6041	14.3443	14.0125	13.8397
KPNA2	A0A7I2V351;A0A7I2V3Z3;A0A7I2V487;A0A7I2YQE1;P52292	1.71533	-0.390754	15.481	15.4938	15.4797	14.9249	15.2804	15.077
PHGDH	A0A286YF22;O43175	1.76559	-0.39182	16.1748	15.9101	15.9285	15.5165	15.6277	15.6938
MMTAG2	Q9BU76;Q9BU76-4	0.171881	-0.392073	10.3072	12.3808	10.3411	11.5083	9.69364	10.651
LYPLA1	A0A087X1K9;E5RGR0;E5RJ48;O75608;O75608-2	0.799735	-0.392524	13.8277	13.3788	14.0061	13.4692	13.4787	13.0872
CHD4	A0A0C4DGG9;A0A2R8Y212;A0A2R8Y425;A0A2R8Y4X2;A0A2R8Y521;A0A2R8Y5J0;A0A2R8YD40;A0A2R8YDJ9;A0A2R8YDW2;A0A2R8YFD8;A0A2R8YFK9;A0A2U3TZM0;F5GWX5;Q14839;Q14839-2	0.507826	-0.395306	12.946	13.7425	12.6141	12.7783	12.5791	12.7593
PDK2	D6R983;D6RDN9;D6RGV8;D6RHG2;D6RJH7;Q15119;Q15119-2	0.297779	-0.395315	11.2619	11.086	11.0435	11.0895	9.68439	11.4315
PBK	Q96KB5;Q96KB5-2	0.568172	-0.396102	15.8841	14.8302	15.247	14.9431	14.8368	14.9931
TXNRD1	A0A087WSW9;A0A087WSY9;A0A182DWI3;E9PIR7;F8W809;Q16881;Q16881-2;Q16881-3;Q16881-4;Q16881-5;Q16881-6	0.912961	-0.396192	14.7563	14.1669	14.2968	13.8621	13.9809	14.1884
KRT3	P12035	0.0799903	-0.397524	10.1442	12.4463	10.392	9.05295	8.95156	13.7854
BZW2	E7ETZ4;Q9Y6E2	0.213831	-0.399029	11.8803	14.3239	12.7671	12.8336	12.5053	12.4354
BRAP	J3KNN7;Q7Z569;Q7Z569-2	0.195143	-0.402429	9.19188	10.9034	11.0731	9.52011	9.42382	11.0172
DPM1	H0Y368;O60762;Q5QPK2	0.56223	-0.403177	13.4704	14.2513	13.3516	13.5679	13.0688	13.2271
RBM14	Q96PK6	0.394676	-0.404398	14.1341	14.9388	13.4719	13.9443	13.6567	13.7305
PFKP	Q01813	2.32791	-0.404753	16.2092	16.0299	16.1529	15.6378	15.8004	15.7396
PTGES3L-AARSD1;PTGES3L-AARSD1;AARSD1;AARSD1;AARSD1	B3KSP9;C9J5N1;Q9BTE6;Q9BTE6-2;Q9BTE6-3	0.312706	-0.408609	10.0325	10.7904	11.5802	10.029	10.1777	10.9706
ENY2	E5RHX8;Q9NPA8;Q9NPA8-2	0.62768	-0.409135	15.1002	15.0445	14.7443	14.8164	14.0103	14.8348
SPRR2E	P22531	0.268253	-0.409542	15.99	17.0347	17.4179	17.0666	15.5796	16.5677
SF3A2	Q15428	0.39195	-0.410096	13.0585	13.0131	13.2871	13.4977	12.6273	12.0035
AAMP	C9JEH3;C9JG97;C9JTS3;Q13685	0.41806	-0.410401	13.5328	13.3645	13.0842	13.129	13.4735	12.1479
MAPK1IP1L	Q8NDC0	0.71229	-0.411275	15.8529	15.0966	15.2549	14.7481	15.036	15.1865
QARS1	P47897;P47897-2	0.5771	-0.411705	13.7367	13.5178	13.6135	12.594	13.4466	13.5924
RFC5	P40937;P40937-2	0.676668	-0.411791	12.9339	13.7089	13.1673	12.7633	12.652	13.1596
SLC25A22;SLC25A22;SLC25A22;SLC25A22;SLC25A22;SLC25A22;SLC25A22;SLC25A22;SLC25A22;SLC25A22;SLC25A22;SLC25A22;SLC25A22;SLC25A18;SLC25A22	A0A0D9SEI9;A0A0D9SFA8;A0A0D9SFE1;A0A0D9SG84;E9PI74;E9PJH7;E9PQ36;K4DIA2;K4DIA8;K4DIB0;K4DIB3;K4DIB6;K4DIB8;Q9H1K4;Q9H936	0.905418	-0.412089	14.5149	14.2193	14.073	13.5293	14.085	13.9566
SPCS2	A0A087WUC6;E9PI68;E9PL01;E9PRB9;Q15005	0.392487	-0.414127	13.335	13.9174	14.2049	13.8383	13.6959	12.6806
YEATS4	F8W0J4;F8W1B9;O95619	1.03916	-0.414229	14.2986	14.7329	14.678	14.1895	14.3586	13.9188
LRBA	A0A494BZW2;A0A494C1L5;E9PEM5;H0YAC6;P50851;P50851-2	1.33459	-0.414639	12.294	12.3636	12.65	12.1405	11.8308	12.0923
FRG1	E9PLY7;E9PRR7;Q14331	0.660651	-0.415939	14.8902	15.0253	14.1548	14.453	14.2066	14.1628
NAT10	Q9H0A0;Q9H0A0-2	1.12484	-0.418524	11.44	11.2876	11.2959	11.1012	10.5872	11.0795
IMPACT	A0A3B3ITH3;J3QQU0;Q9P2X3;Q9P2X3-2	0.636303	-0.419352	9.60795	10.2083	10.5002	9.65641	9.46153	9.94041
HNRNPUL2-BSCL2;HNRNPUL2	H3BQZ7;Q1KMD3	1.08072	-0.420042	13.7087	13.5895	13.6833	13.1446	12.9895	13.5872
PPP4R1	Q8TF05;Q8TF05-2	0.171736	-0.421579	9.63069	12.3472	11.8689	10.1376	11.5254	10.9191
MAT2A	P31153	1.70351	-0.42221	18.4005	18.3459	18.0496	17.8906	17.7968	17.842
DDOST	A0A0C4DGS1;P39656;P39656-2;P39656-3	0.686452	-0.422928	14.3901	13.8763	14.4245	13.3763	13.9768	14.0688
POLR2C	P19387	0.487291	-0.423945	12.841	12.375	12.9907	11.7363	12.8802	12.3184
GAPDH	P04406	0.323299	-0.424065	16.484	17.7442	18.1954	17.2558	16.721	17.1746
TRMT112	Q9UI30	0.72739	-0.425266	15.1032	15.7193	14.9859	15.1199	14.7588	14.6539
CSTA	C9J0E4;P01040	0.19697	-0.426485	15.7189	14.9196	15.2087	13.2582	15.6508	15.6589
DCTPP1	Q9H773	1.84134	-0.426708	14.9315	14.9034	14.6691	14.4348	14.4976	14.2915
AARS1	A0A6Q8PF33;A0A6Q8PFY2;A0A6Q8PGB5;A0A6Q8PGE8;A0A6Q8PGN5;A0A6Q8PGR9;H3BPK7;P49588;P49588-2	0.208056	-0.427316	9.12307	9.78333	10.1913	7.81838	10.1407	9.85669
SRSF1	J3KTL2;Q07955	0.305153	-0.430822	16.9634	18.1726	16.2985	16.4363	16.6769	17.0288
TUBB4A	P04350	0.87709	-0.431842	14.7253	15.3583	14.6292	14.499	14.4434	14.4749
POLR2H	C9JLU1;P52434;P52434-4	0.26936	-0.432986	10.152	11.9485	12.07	10.793	10.7784	11.3001
CCAR2	E5RHJ4;Q8N163;Q8N163-2	0.783524	-0.434225	15.4934	14.688	15.0246	14.4953	14.5701	14.8378
CKAP4	Q07065	0.30473	-0.434493	9.28854	10.1029	10.9885	9.30432	9.46754	10.3046
PABPC1	A0A087WTT1;A0A7I2V649;A0A7I2YQ90;E7ERJ7;H0YAR2;P11940;P11940-2	0.872816	-0.434876	14.7216	15.0893	14.2921	14.2253	14.3161	14.257
ACTN4	O43707	0.318671	-0.435666	14.7361	16.0391	14.269	14.935	14.3339	14.4683
DHX30	H7BXY3;Q7L2E3;Q7L2E3-2;Q7L2E3-3	0.943905	-0.435991	12.1274	11.8289	11.4259	11.4671	11.3884	11.2187
SAAL1	Q96ER3	0.306271	-0.439358	10.104	10.9156	11.4281	10.9144	9.50598	10.7092
YTHDF2	Q9Y5A9;Q9Y5A9-2	0.487218	-0.440868	12.7543	13.6796	12.8719	13.059	12.1573	12.7668
POLR1B	Q9H9Y6;Q9H9Y6-3;Q9H9Y6-5	0.56162	-0.442215	12.1541	11.3506	11.3991	11.3304	10.7372	11.5094
HNRNPUL1	A0A0A0MRA5;B7Z4B8;M0R3F1;Q9BUJ2;Q9BUJ2-2;Q9BUJ2-4	1.72721	-0.442488	13.1705	12.8056	13.0029	12.6066	12.5895	12.4554
HMGA2	F5H2A4;F5H2U8;F5H6H0;P52926;P52926-2;P52926-3;P52926-4;P52926-5;P52926-6	0.105536	-0.445526	9.79398	13.7489	8.90518	10.2213	10.9765	9.91366
CYC1	P08574	1.6268	-0.447428	14.5274	14.7368	14.7268	14.0441	14.4084	14.1963
PFN1	P07737	0.0869122	-0.447642	9.40239	14.9453	12.4543	12.2643	10.1233	13.0715
NOP9	A0A3B3ISH6;Q86U38;Q86U38-2	1.11646	-0.4491	12.183	12.4103	11.8115	11.8318	11.6147	11.611
NUBP1	P53384;P53384-2	0.647833	-0.449636	14.5537	15.1362	14.0749	14.2447	14.1502	14.0209
LGALS1	P09382	0.776773	-0.449856	17.454	18.3186	17.6042	17.3383	17.3264	17.3625
RNPS1	H3BMM9;H3BTC0;H3BV80;Q15287;Q15287-2;Q15287-3	0.720279	-0.450284	16.2403	16.6113	15.6722	15.809	15.8093	15.5547
DSP	P15924	0.278791	-0.450381	16.9512	18.203	19.0572	17.9499	17.2053	17.7051
GMPS	P49915;P49915-2	0.687294	-0.453576	14.8161	15.2089	14.213	14.4495	14.2332	14.1946
RPN1	P04843	2.40482	-0.455411	14.7443	15.0074	14.8833	14.428	14.4119	14.4289
PSMB2	A0A087WVV1;P49721	0.673957	-0.456864	14.643	14.8553	15.1054	14.8741	14.4437	13.9153
UBL5	Q9BZL1	0.262126	-0.457177	13.4569	15.5691	13.5808	13.9696	13.7232	13.5424
POLR2A	A0A6Q8PGB0;P24928	1.58987	-0.457355	12.1873	12.0298	12.2169	11.459	11.8569	11.7461
TFCP2	F8VWL0;F8VX55;Q12800;Q12800-2;Q12800-3;Q12800-4	0.709259	-0.458798	14.5115	13.544	13.7436	13.4924	13.4883	13.4421
FPGS	Q05932;Q05932-2;Q05932-3;Q05932-4;Q5JU20;Q5JU21;Q5JU23	0.461023	-0.459365	11.8202	10.5358	11.6028	10.5841	10.8375	11.159
PKP1	Q13835;Q13835-2	0.306715	-0.459422	14.6178	15.044	16.1754	15.0244	14.0553	15.3791
PDCD6	A0A024QZ42;O75340;O75340-2	0.516643	-0.460391	14.1335	14.5225	13.4127	13.9971	13.3414	13.3491
RPS20	P60866;P60866-2	1.23267	-0.461772	16.9073	16.9653	16.4599	16.1691	16.4045	16.3737
ZNF207	J3KS31;J3QRS9;O43670;O43670-2;O43670-3;O43670-4;X6R4W8	0.43568	-0.462478	13.4198	14.3663	12.8054	13.0773	13.0168	13.11
ANAPC1	H0Y564;Q9H1A4	0.283409	-0.463111	10.4316	9.18456	10.2992	9.76442	8.49599	10.2657
SEC61A1	B4DR61;P61619;P61619-3	0.348846	-0.464245	13.3174	14.6715	13.7414	13.8501	13.8029	12.6845
NANP	Q8TBE9	0.3855	-0.464663	13.6955	12.8188	11.9609	12.1964	12.4354	12.4494
NOB1	H3BUR4;Q9ULX3	0.583238	-0.464913	12.7348	13.684	12.6537	12.2998	12.6659	12.7119
TBCB	A0A494C0X0;K7EK42;Q99426	0.310207	-0.466808	9.24495	10.2448	10.4563	9.12446	8.93701	10.4842
SNRPD2	P62316	0.375213	-0.467578	16.5969	17.878	16.1546	16.5201	16.4469	16.2598
INO80C	K7EIY8;Q6PI98;Q6PI98-4	0.78382	-0.468088	14.3142	13.8133	13.949	13.7782	13.7991	13.0949
PUM1	H0YEH2;Q14671;Q14671-2;Q14671-3;Q5T1Z4;Q5T1Z8	1.20495	-0.46859	13.1839	12.7076	12.6173	12.4251	12.4101	12.2679
ADO	Q96SZ5	0.644792	-0.469913	14.7478	13.974	13.9744	14.1224	13.4142	13.7499
HNRNPA2B1	A0A7I2V323;A0A7I2V3P1;A0A7I2V3P7;A0A7I2V4I6;A0A7I2V4N1;A0A7I2V4S4;P22626;P22626-2	0.346484	-0.470934	15.0213	16.7826	15.6132	15.7297	14.9577	15.3169
DNAJC10	A0A7P0TAQ9;Q8IXB1	0.957086	-0.471738	17.482	16.767	17.0322	16.4778	16.8102	16.578
HSD17B12	A0A1B0GV93;Q53GQ0	0.768742	-0.472785	11.5712	12.3607	12.3791	11.58	11.8172	11.4954
NCCRP1	Q6ZVX7	0.549049	-0.474784	15.0594	15.2053	16.2138	15.212	15.0469	14.7953
RAN	B5MDF5;F5H018;J3KQE5;P62826	0.793883	-0.475674	14.3786	14.4785	14.089	13.338	14.0871	14.0941
MOCOS	Q96EN8	0.381177	-0.476081	12.0741	10.8028	12.3231	11.4291	11.5449	10.7977
MTOR	P42345	0.360472	-0.476304	11.5712	10.0804	11.3907	11.1118	10.2143	10.2872
RPA1	P27694	1.09765	-0.477438	14.0579	13.7228	13.8027	13.5105	13.608	13.0325
BID	P55957;P55957-2	0.658511	-0.477566	14.9398	15.0083	14.5894	14.5718	14.7583	13.7747
LRRFIP1	Q32MZ4;Q32MZ4-2;Q32MZ4-3	0.279123	-0.47778	9.29188	10.7498	9.01557	9.70978	9.56096	8.35317
SLC25A11	I3L1P8;Q02978	2.60757	-0.477885	15.0761	15.2001	15.0049	14.661	14.6534	14.5331
XRCC5	P13010	1.75785	-0.478013	15.7517	15.6278	15.7151	14.9873	15.3217	15.3515
MALT1	Q9UDY8;Q9UDY8-2	0.677662	-0.481609	12.2297	12.6859	11.8256	11.6012	12.1751	11.5201
TMX1	Q9H3N1	0.967335	-0.483543	13.3175	13.9344	13.4922	13.3551	12.8521	13.0863
NRGN	Q92686	0.900582	-0.484248	14.625	15.1061	14.6102	14.1079	14.1031	14.6777
SMYD5	Q6GMV2	0.846949	-0.486172	14.6144	14.1733	14.9057	13.7642	14.1791	14.2916
TRMT1	Q9NXH9;Q9NXH9-2	0.653557	-0.486662	14.0037	13.5542	12.9974	13.364	12.8064	12.9249
SDHA	D6RFM5;P31040;P31040-2	1.47194	-0.487459	15.0976	14.8533	14.7399	14.2925	14.6326	14.3033
CTNNB1	A0A2R8Y543;A0A2R8Y5A3;A0A2R8Y5C3;A0A2R8Y5Z1;A0A2R8Y750;A0A2R8Y7Z0;A0A2R8Y804;A0A2R8YCH5;B4DGU4;P35222	0.975532	-0.488578	12.8215	12.9252	12.838	12.578	11.9091	12.6318
SMARCC2	F8VXC8;Q8TAQ2;Q8TAQ2-2;Q8TAQ2-3	0.943639	-0.490222	12.6983	12.5861	13.0554	12.5386	11.8994	12.4311
EIF3G	K7ENA8;O75821	2.26335	-0.490403	15.1317	15.1333	14.8957	14.6093	14.6022	14.4779
NCAPD3	E9PKK4;G3V1A9;P42695	0.431442	-0.490598	11.4838	10.584	10.759	9.68072	11.0287	10.6456
MYH9	P35579	2.30648	-0.491037	15.7064	15.6647	15.813	15.1273	15.2022	15.3816
MRGBP	Q9NV56	0.559304	-0.491037	14.2388	14.1307	14.3966	14.1024	14.1881	13.0026
SEPTIN9	Q9UHD8;Q9UHD8-2;Q9UHD8-3;Q9UHD8-5;Q9UHD8-7	0.699614	-0.492648	14.2542	14.2257	13.9202	13.7627	14.0933	13.0661
KRT1	P04264	0.333199	-0.494293	22.2049	23.4342	24.1961	23.1527	22.7036	22.4959
ABCF2	C9JHK9;C9JZV3;Q9UG63;Q9UG63-2	0.26558	-0.495263	10.0948	9.11033	11.1617	8.95017	9.44707	10.4838
S100A9	P06702	0.202354	-0.497758	13.7545	14.3271	12.2696	13.3627	11.545	13.9503
NUP93	Q8N1F7;Q8N1F7-2	0.820817	-0.498673	14.1789	14.5487	13.6104	13.6397	13.4841	13.7181
SEC23A	F5H365;Q15436	1.50431	-0.500458	12.8444	12.9797	12.582	12.2021	12.5021	12.2006
SRSF9	Q13242	0.607936	-0.502294	14.4813	14.5611	13.4317	13.5902	13.5826	13.7945
ATP5F1A	P25705;P25705-2	1.43343	-0.504336	15.511	15.4134	15.7398	14.798	15.1095	15.2437
EIF5	P55010	0.153245	-0.506959	11.0749	11.3336	7.55286	9.15677	9.84854	9.43517
AGPS	A0A1B0GWA2;A0A2R8YEL0;A0A7P0T984;A0A7P0TAL3;A0A7P0TAU9;B7Z3Q4;O00116	0.398515	-0.507375	14.1139	12.436	13.0358	12.2743	13.0321	12.7571
CTPS2	Q9NRF8	1.02816	-0.510501	13.7727	13.101	13.2058	12.822	12.6845	13.0416
ELP3	B4DKA4;Q9H9T3;Q9H9T3-2;Q9H9T3-4;Q9H9T3-5	0.235531	-0.511335	12.017	13.8392	11.5803	12.9586	11.5871	11.3568
NCBP2AS2	Q69YL0	0.325757	-0.514358	10.0832	11.8256	9.77696	10.2819	9.96004	9.90079
ASMTL	O95671;O95671-3	0.504241	-0.515916	11.652	12.8694	12.0314	12.0671	11.1633	11.7746
NIBAN2	Q96TA1;Q96TA1-2	0.256879	-0.516185	12.1741	11.4416	11.6124	9.93578	11.1512	12.5926
ACTR5	Q9H9F9	1.03558	-0.517815	13.8282	13.8659	13.2789	13.4068	13.0696	12.943
CARS1	B4DKY1;P49589;P49589-2;P49589-3	1.53053	-0.517915	13.8568	14.2994	14.2291	13.7375	13.6141	13.4799
UHRF1	A0A087WTW0;A0A087WVR3;Q96T88;Q96T88-2	3.05197	-0.523284	13.7997	13.9603	13.8321	13.3191	13.4049	13.2981
TRIM32	Q13049;Q5JVY0	1.85937	-0.523435	12.8186	12.7474	12.6743	12.1557	12.0617	12.4527
ADAT3	D6W601;Q96EY9	0.312432	-0.525947	10.4555	8.18211	9.53875	9.24755	8.71575	8.63525
HPRT1	P00492	0.885745	-0.526987	15.6189	16.0569	15.1562	15.2732	15.0159	14.962
TRIM28	Q13263	1.33174	-0.52802	15.6136	16.1754	15.6452	15.2612	15.2372	15.3517
SLC25A1	P53007	1.03609	-0.528069	15.0249	14.7633	14.8259	14.7839	14.2103	14.0357
KRT9	P35527	0.248403	-0.528444	22.3844	24.5542	24.7721	24.06	23.2157	22.8497
ACADVL	P49748;P49748-2;P49748-3	0.217787	-0.528695	11.2454	9.94205	9.74285	8.17997	10.284	10.8802
PRKACB	A0A087WVC4;A0A0A0MS54;B1APF7;B1APF8;B1APF9;B1APG0;B1APG1;B1APG2;B1APG3;P22694;P22694-2;P22694-3;P22694-4;P22694-5;P22694-6;P22694-7;P22694-8;P22694-9	0.225548	-0.528864	9.55134	11.6647	8.64656	9.67517	9.02608	9.57476
SEC31A	D6REX3;D6RHZ5;H0Y8V7;H0Y9K1;H0YAB3;H7BXG7;O94979;O94979-10;O94979-2;O94979-3;O94979-4;O94979-6;O94979-7;O94979-8;O94979-9	0.64816	-0.530431	11.8172	10.7018	11.0632	10.3459	10.7185	10.9264
NELFE	A0A0A0MSN9;A0A0A0MT02;A0A0G2JI50;A2ABK4;E9PD43;P18615;P18615-3;P18615-4	0.219993	-0.530762	9.96136	13.0179	10.9661	10.9037	10.2614	11.188
EIF3D	O15371;O15371-2;O15371-3	1.30321	-0.53087	15.3885	14.8318	14.8755	14.433	14.4352	14.635
STAU1	O95793;O95793-2;O95793-3;Q5JW30	0.452071	-0.531182	12.4225	13.5209	12.2371	11.6743	12.1684	12.7444
PPA1	Q15181	0.657627	-0.533417	14.8823	15.8236	14.6334	14.6931	14.4944	14.5516
GOPC	F5H1Y4;Q9HD26;Q9HD26-2	0.728508	-0.533847	13.1666	12.8086	12.4277	12.7847	11.9892	12.0274
CSTF1	Q05048	0.609242	-0.534136	13.4389	12.5288	13.0772	12.0784	13.046	12.3181
RFC1	P35251;P35251-2	0.424057	-0.535239	12.3537	12.3211	11.3352	11.1506	10.9487	12.305
UQCRC1	P31930	1.95982	-0.535948	12.8001	12.4197	12.7113	12.0784	12.1738	12.071
KRT71	Q3SY84	0.135026	-0.536707	17.0983	21.8957	20.2171	20.021	18.9049	18.6749
CAPRIN1	Q14444;Q14444-2	0.834389	-0.53707	14.8785	15.0523	14.0911	14.2115	14.1286	14.0707
G6PD	P11413;P11413-2;P11413-3	1.05841	-0.537643	14.5447	15.2017	14.5266	14.2017	14.3799	14.0784
SFSWAP	Q12872;Q12872-2	0.138185	-0.539009	13.5652	11.9598	10.5625	12.5521	9.18947	12.7288
PRPF40A	A0A7N4I394;O75400;O75400-2;O75400-3	0.74335	-0.539127	14.8265	14.2694	13.7819	13.5131	13.9992	13.748
RXRB	A0A0G2JKR7;P28702;P28702-3	0.497064	-0.541573	11.3982	12.2397	12.6769	11.9109	11.7964	10.9827
SUPT5H	O00267;O00267-2	0.593164	-0.542896	12.1034	11.328	10.7755	11.0706	10.9077	10.6
GALE	Q14376;Q14376-2;Q5QPP3	0.29634	-0.545248	9.02335	11.205	11.1277	10.3353	9.70376	9.68137
UBE2A	A0A0D9SEZ6;A0A0D9SG71;P49459	1.13232	-0.545259	14.7478	15.0038	14.3846	14.4419	14.0114	14.0473
MLST8	Q9BVC4;Q9BVC4-5	0.702206	-0.545813	13.6011	12.3811	13.0271	12.412	12.425	12.5348
ACTR8	Q9H981	0.56571	-0.546125	13.2188	14.3001	13.6844	13.7552	12.7763	13.0334
ENO1	A0A2R8Y6G6;P06733	1.08453	-0.547211	14.0873	14.8158	14.4983	13.9021	13.7413	14.1164
ANXA7	P20073;P20073-2	0.784077	-0.54924	14.3098	13.5423	14.446	13.2738	13.5518	13.8248
POLD2	A0A087WWF6;F8W8R3;P49005	0.997655	-0.549997	14.3721	13.7925	13.6557	13.1351	13.4331	13.6021
CD2AP	Q9Y5K6	0.961461	-0.551178	13.9373	14.6349	13.9146	13.754	13.7219	13.3575
TLN1	Q9Y490	0.298755	-0.552277	11.3264	11.3432	10.9304	10.042	9.78439	12.1168
ARCN1	B0YIW6;P48444	1.98223	-0.552924	13.6281	13.4571	13.4716	12.765	12.9959	13.1372
KRT13	K7EMD9	0.413315	-0.55303	15.1463	16.2781	16.5695	16.0252	14.7633	15.5463
SNRPC	P09234	0.762347	-0.55428	13.4842	14.3114	13.3433	13.2395	13.3574	12.8791
DYNLL1	P63167	0.367235	-0.555074	16.1101	17.9654	16.2137	16.2528	15.8548	16.5164
CDK9	P50750;P50750-2	0.999098	-0.556208	14.8232	14.3948	14.182	13.5547	14.1428	14.0339
CPNE1	A6PVH9;B0QZ18;F2Z2V0;Q99829	0.958035	-0.557505	12.7978	12.1548	12.1108	12.1124	11.6516	11.6269
ALDH16A1	Q8IZ83;Q8IZ83-2;Q8IZ83-3	0.934658	-0.558583	12.4188	12.2148	12.6238	11.4257	12.3029	11.853
RANGAP1	P46060	0.578879	-0.559447	12.1601	12.3742	11.5447	12.0217	10.8154	11.5636
MCCC2	A0A804HJ24;A0A804HJ31;A0A804HK37;A0A804HKE8;A0A804HL02;A0A804HLJ9;Q9HCC0;Q9HCC0-2	1.17956	-0.560038	13.6166	14.1695	13.6058	13.3962	13.3209	12.9947
S100A14	Q9HCY8	0.24974	-0.560456	11.7032	13.844	14.3708	13.4395	12.2791	12.5179
TRIP13	Q15645	1.53917	-0.561039	14.0882	14.4081	14.096	13.8926	13.4612	13.5554
CORO7-PAM16;PAM16;PAM16;PAM16;PAM16;CORO7;PAM16	A0A0A6YYL4;A0A0B4J298;I3L0X9;I3L1U7;I3L3T0;P57737-3;Q9Y3D7	0.200809	-0.563334	9.78526	12.2293	10.7241	11.8917	9.12938	10.0276
MSL1	J3KSZ8;J3QQY0;Q68DK7	0.406235	-0.563365	12.1284	11.8328	11.1872	11.5597	11.7752	10.1234
MED16	Q9Y2X0;Q9Y2X0-2;Q9Y2X0-3	0.798478	-0.564388	13.3484	13.2941	13.1159	13.0148	12.0506	13
RPL36A;RPL36A-HNRNPH2;RPL36A;RPL36A	H0Y5B4;H7BZ11;J3KQN4;P83881	0.569839	-0.572304	16.9567	15.9614	15.7769	15.1935	16.0734	15.7111
CPA4	B7Z5J4;Q9UI42;Q9UI42-2	0.205754	-0.57354	9.85107	10.9502	12.3125	11.5748	8.89111	10.9271
SF3A3	Q12874	0.120952	-0.574893	10.7332	14.1582	9.20542	12.3524	9.13728	10.8825
HCCS	P53701	0.956163	-0.576579	13.0625	13.6982	12.8697	12.8671	12.6175	12.416
CHAF1B	Q13112	1.71759	-0.577135	13.7883	13.5473	13.4485	12.854	13.2361	12.9626
CD320	Q9NPF0	0.814512	-0.577988	15.6491	14.5952	15.0607	14.3122	14.7352	14.5237
NCAPD2	Q15021	0.921109	-0.578729	17.2702	16.5723	16.9432	16.0568	16.7649	16.2279
KRT6C	P48668	0.101607	-0.579511	9.86678	13.9525	13.8547	14.7216	9.37252	11.8414
SMG9	Q9H0W8;Q9H0W8-2	0.920016	-0.581378	13.5501	13.368	13.7207	12.8706	13.4849	12.5392
NASP	P49321;P49321-2;P49321-3	1.68386	-0.58274	14.2385	14.0773	13.849	13.4271	13.3095	13.68
SMCHD1	A6NHR9;A6NHR9-2;J3KTL8	0.332125	-0.582982	10.1487	12.121	11.3134	11.0216	11.0848	9.72778
SH3PXD2B	A0A1B0GUF2;A1X283;G3V144	0.381642	-0.583029	10.8763	10.4376	9.94482	8.67045	10.4353	10.4039
UBE3A	A0A0D9SG77;A0A1B0GVL3;A0A6Q8PHE5;Q05086;Q05086-2;Q05086-3	1.48408	-0.583419	12.8588	13.3224	13.0408	12.4635	12.7148	12.2934
HSP90B1	A0A087WT78;A0A7P0T823;A0A7P0T917;A0A7P0TAE1;A0A7P0TAT8;H0YIV0;P14625	1.1269	-0.58355	13.9095	13.3849	13.6853	12.7587	13.0537	13.4167
PGLS	O95336	0.821334	-0.583794	15.6453	15.7087	15.6407	15.1665	14.4743	15.6026
PITRM1	A0A7I2V3B6;A0A7I2V5C6;A0A7I2V5H2;A0A7I2YQT2;A0A7I2YQX5;Q5JRX3;Q5JRX3-2	0.315941	-0.585524	13.7462	12.0824	12.1628	11.733	13.1201	11.3817
PRDX2	P32119	1.11584	-0.586359	15.7171	16.1165	16.4967	15.3266	15.5768	15.6678
ABHD14B	F8W9U3;Q96IU4;Q96IU4-2	0.264406	-0.587216	11.3854	10.494	10.7018	10.5468	11.5802	8.69253
SMNDC1	O75940	0.874655	-0.587218	15.749	14.85	14.7828	14.5723	14.5592	14.4886
IGHG1	A0A0A0MS07;A0A0A0MS08;P01857	0.205492	-0.587337	13.867	12.7941	14.9491	12.1794	12.5753	15.0935
ATP1A1	P05023;P05023-3;P05023-4	1.88345	-0.59039	13.8397	13.9636	13.8935	13.1647	13.1847	13.5762
NUP133	Q8WUM0	1.35772	-0.596285	14.9521	14.5186	15.0088	14.0582	14.4958	14.1365
NCAPG	Q9BPX3	0.646244	-0.5969	13.9862	12.6002	13.5484	12.8767	12.85	12.6174
EDC3	Q96F86	0.653939	-0.597559	13.7408	12.7393	12.5813	12.3491	12.1233	12.7963
MDH2	P40926;P40926-2	0.406737	-0.597992	9.98592	11.5543	10.3678	9.61973	9.6414	10.853
NECAP2	D6RAN6;D6RB24;F6SKB8;Q9NVZ3;Q9NVZ3-2;Q9NVZ3-3	0.431282	-0.599105	11.2349	11.0988	11.9836	11.7527	9.92781	10.8395
FXR1	P51114;P51114-2	1.20645	-0.59911	14.2787	13.9302	13.5531	13.2286	13.5268	13.2092
MRPL39	C9JG87;Q9NYK5;Q9NYK5-2	0.791957	-0.600659	14.6008	13.4725	14.4162	13.5851	13.516	13.5865
CDSN	G8JLG2;Q15517;Q2L6G8	0.270699	-0.600825	15.0572	16.8554	17.839	16.6001	15.3661	15.983
SNTB2	A0A140TA73;Q13425;Q13425-2	0.729989	-0.601274	14.5151	13.6995	14.0554	13.2178	14.0767	13.1718
AAR2	A0A7P0T8J7;A0A7P0TA70;A2A2Q9;Q9Y312	0.293462	-0.602826	11.6228	9.39116	11.8611	10.091	10.0786	10.897
UBE2L6	O14933	1.00159	-0.604967	16.244	16.5063	15.561	15.4697	15.4682	15.5584
AP3B2;AP3B2;AP3B2;AP3B2;AP3B2;AP3B2;AP3B2;AP3B2;AP3B2;AP3B1;AP3B1;AP3B2;AP3B2;AP3B2	A0A2R8Y2A8;A0A590UJ60;A0A590UJU0;A0A590UJW5;A0A590UK04;A0A590UKC4;A0A590UKD3;A0A5F9UJV3;F5GWU4;O00203;O00203-3;Q13367;Q13367-3;Q13367-4	0.281268	-0.606655	9.44135	12.1937	10.465	10.666	9.52257	10.0915
WAPL	Q7Z5K2;Q7Z5K2-2;Q7Z5K2-3	0.956393	-0.607093	13.1411	13.158	13.0931	12.4344	13.076	12.0605
G3BP1	A0A7I2V5M7;A0A7I2YQN9;Q13283	0.844123	-0.607413	13.9285	14.9858	14.0571	13.6661	13.7322	13.7508
PSMA2;;PSMA2	A0A024RA52;A0A7I2V2H3;P25787	1.05294	-0.608159	12.9775	12.8649	13.6808	12.7502	12.466	12.4825
JUP	P14923	0.389989	-0.61048	16.1114	17.5419	18.2301	17.0755	16.3333	16.6432
DNAJC2	Q99543	0.626698	-0.610789	14.0657	14.4759	13.4124	13.9844	13.1683	12.9689
PARG	Q86W56;Q86W56-2;Q86W56-3;Q86W56-4;Q86W56-5	0.219338	-0.611992	13.3036	10.8218	13.0733	12.1383	10.3585	12.866
LARS1	A0A6I8PIP7;A0A6I8PIT3;A0A6I8PIV1;A0A6I8PL42;A0A6I8PLB3;A0A6I8PLB8;A0A6I8PRS0;A0A6I8PS05;B4DER1;Q9P2J5;Q9P2J5-2	0.862633	-0.612108	11.2007	11.4722	11.8712	11.4349	10.6162	10.6567
RPS21	P63220;Q8WVC2	1.92069	-0.615857	18.1343	18.1542	17.7357	17.3236	17.4474	17.4057
SNX1	H0YK42;Q13596;Q13596-2;Q13596-3	0.324554	-0.617207	12.0542	13.165	11.7227	12.9829	11.1916	10.9157
BSG	A0A087WUV8;A0A7P0T8A7;A0A7P0TA85;A0A7P0TB04;P35613;P35613-2;P35613-3;P35613-4	0.612756	-0.619717	13.7382	13.5083	13.9444	12.2468	13.438	13.647
POLRMT	O00411	1.01209	-0.621119	11.9404	12.1302	11.9534	11.1858	11.0322	11.9427
MAPK8	P45983-3;P45983-4	1.10054	-0.621786	13.8135	13.047	13.047	12.5612	12.6683	12.8126
RIPK2	O43353;O43353-2	0.609107	-0.623061	12.4628	11.1032	11.7028	10.8275	10.9746	11.5976
LYSMD2	Q8IV50	0.392263	-0.623807	13.8475	15.7812	14.2074	14.4058	14.1831	13.3757
ALDH18A1	P54886;P54886-2	2.77289	-0.6253	14.7492	14.7931	14.7162	13.974	14.2451	14.1635
RPIA	P49247	1.60153	-0.62573	14.3719	14.4622	13.8941	13.6799	13.5912	13.58
LRPPRC	A0A804HHY9;A0A804HI40;A0A804HIG4;A0A804HIN4;A0A804HIQ7;A0A804HJZ1;A0A804HK30;A0A804HKI2;A0A804HKR3;A0A804HL40;A0A804HLG8;P42704	1.57726	-0.625966	15.1441	15.2175	15.0378	14.2263	14.4675	14.8277
FERMT2	A0A0U1RRM8;H0YJ34;Q96AC1;Q96AC1-2;Q96AC1-3	0.93069	-0.632286	11.2806	10.8929	11.3694	10.2814	10.2525	11.1121
EXOSC10	Q01780;Q01780-2	1.39949	-0.632429	12.4938	12.6396	12.8351	12.1108	12.2934	11.6669
HEXIM1	O94992	0.662065	-0.633155	13.7729	13.7995	13.0368	13.3306	13.1784	12.2009
AIMP1	A0A5F9ZHC5;A0A804HJ47;Q12904;Q12904-2	0.734694	-0.634103	15.2417	14.0165	14.554	13.6491	14.2533	14.0074
NLRP2	A0A0G2JLQ8;A0A0G2JLX3;A0A0G2JMG8;A0A0G2JNC8;A0A0G2JP37;A0A0G2JPQ2;J3KN39;Q9NX02;Q9NX02-2;Q9NX02-4;Q9NX02-5	0.87803	-0.635015	16.0273	16.5359	15.5349	15.3389	15.1318	15.7223
PRPF38A	Q8NAV1	0.502725	-0.639768	13.4106	15.1208	14.1044	14.0531	13.208	13.4554
ATG3	F8WDI0;Q9NT62;Q9NT62-2	0.644088	-0.640896	12.9159	13.2845	12.2549	12.2988	11.549	12.6849
GPT2	Q8TD30;Q8TD30-2	1.1551	-0.641527	14.1898	13.8096	13.2997	13.117	13.0573	13.2002
CWF19L1	A0A286YF56;Q69YN2	0.428061	-0.642633	11.5106	12.5274	11.1817	10.88	10.3649	12.0469
PUS1	F5H1S9;G8JLB3;Q9Y606;Q9Y606-2	1.13498	-0.648982	14.4321	14.0799	13.7517	13.1421	13.7747	13.3999
PGM3	A0A087WT27;A0A494C0G1;A0A494C1E2;A0A494C1Q4;H0Y987;J3KN95;O95394;O95394-3;O95394-4	0.825208	-0.65108	15.1413	13.894	14.3703	13.7477	13.8868	13.8178
TYMP	C9JGI3;P19971;P19971-2	0.12523	-0.6526	13.8628	8.23558	9.21504	8.75821	11.342	9.25545
TIMM50	M0R003;Q3ZCQ8;Q3ZCQ8-2	0.609725	-0.653974	14.3014	14.2569	12.8501	13.232	13.0182	13.1962
DVL3;DVL2;DVL2;DVL2;DVL2;DVL3;DVL3	A0A3B3ITC6;I3L0M7;I3L2N2;I3L2W9;O14641;Q92997;Q92997-2	0.647469	-0.654997	8.92696	9.05446	9.25494	7.58738	9.11562	8.56837
SERPINB3	P29508	0.700978	-0.657475	12.5918	13.7763	13.1705	12.5817	12.0502	12.9343
PGP	A6NDG6	1.09897	-0.657955	15.3047	14.3568	14.7668	14.0517	14.1361	14.2666
NSL1	Q96IY1	0.609412	-0.661153	13.2007	12.4383	11.5192	11.7074	11.7684	11.699
ADI1	Q9BV57	0.344441	-0.661269	11.1623	13.5781	12.0963	12.3249	11.0687	11.4593
CDC42	P60953	0.52073	-0.661446	12.5117	13.4431	11.5189	11.7787	11.7766	11.934
EMD	P50402;Q5HY57	0.163039	-0.661462	19.0406	15.0124	14.9397	15.1452	14.8044	17.0587
SNRPD1	P62314	0.545589	-0.663342	14.7444	14.1138	13.6286	13.5809	12.7172	14.1986
SBSN	Q6UWP8	0.291816	-0.664986	11.7601	12.8518	13.9684	12.8628	10.8625	12.86
EIF3H	B3KS98;E5RFH0;E5RFW7;O15372	0.982787	-0.667041	11.5111	12.5088	12.029	11.451	11.0819	11.515
RTCA	O00442;O00442-2	0.420209	-0.671843	12.2969	13.454	11.6366	11.5394	11.2096	12.623
CSDE1	E9PLT0;O75534;O75534-2;O75534-3;O75534-4	3.08881	-0.673377	12.786	12.9636	12.8514	12.198	12.0997	12.2832
PPCDC	Q96CD2	0.665584	-0.673582	11.7339	12.8606	12.7077	12.2788	11.7391	11.2636
GGCT	B8ZZK2;O75223	0.483787	-0.673783	13.4439	15.1617	14.2631	14.1714	12.9767	13.6992
HMGCL	P35914	1.67439	-0.678176	14.1713	14.0108	13.7443	13.2269	13.1055	13.5595
COPB1	P53618	2.04803	-0.679563	13.6083	13.2936	13.5221	12.8004	12.9792	12.6057
BCCIP	Q9P287;Q9P287-2;Q9P287-3;Q9P287-4	0.261241	-0.680178	10.3648	12.0849	10.1469	10.0365	11.7045	8.81502
SMC4	C9IYK2;C9J9E4;C9JJ64;C9JR83;C9JWF0;E9PD53;Q9NTJ3;Q9NTJ3-2	0.25602	-0.680799	12.8758	9.99232	10.8568	9.33266	10.999	11.3508
SERBP1	Q8NC51;Q8NC51-2;Q8NC51-3;Q8NC51-4	0.466723	-0.681068	12.7403	14.3989	13.2201	13.5597	12.4235	12.3328
PHF5A	Q7RTV0	1.4981	-0.68135	16.2241	16.1822	15.6429	15.4128	15.4489	15.1434
ATAD3A	Q9NVI7-2	3.14994	-0.681751	15.2339	15.1713	15.1188	14.4251	14.6214	14.4322
ACTR2	F5H6T1;P61160;P61160-2	0.744294	-0.681801	10.9115	11.7001	10.7976	10.5283	10.9513	9.88425
OAS3	A0A7P0T9J0;A0A7P0T9W6;A0A7P0TAU8;A0A7P0Z4D0;A0A7P0Z4F1;Q9Y6K5	0.878821	-0.685108	13.0658	13.8202	12.7442	12.8703	12.3825	12.3221
TMPO	P42166	1.54578	-0.68946	15.5761	16.2024	15.7316	15.3064	15.1052	15.0301
FAM120B	A0A0D9SEJ5;F5GY05;Q96EK7	0.731286	-0.69168	13.3986	13.3966	13.2684	12.9689	13.2079	11.8116
EIF4G1	A0A7I2Y1C3;E7EUU4;E7EX73;E9PGM1;Q04637;Q04637-3;Q04637-4;Q04637-5;Q04637-6;Q04637-7;Q04637-8;Q04637-9	0.97248	-0.698369	13.3853	14.0219	13.0878	12.4843	12.765	13.1505
ELAC2	Q9BQ52;Q9BQ52-4	0.338235	-0.698983	9.90831	11.8299	9.73533	10.7636	8.94916	9.66385
ADA	P00813	1.0221	-0.700061	14.0599	13.4271	14.2631	13.3765	12.8191	13.4543
H1-10	Q92522	0.42626	-0.700286	11.5628	12.3515	11.1261	12.0324	9.94333	10.9638
DUSP9	Q99956	0.883183	-0.701361	12.3017	12.3142	11.7908	11.1462	12.0873	11.0691
FUBP1	E9PEB5;Q96AE4;Q96AE4-2	1.65561	-0.702278	15.0364	14.6255	14.6721	13.9722	13.8963	14.3587
LSM12	Q3MHD2;Q3MHD2-2	1.60815	-0.704063	15.4169	15.226	14.8038	14.2904	14.4565	14.5876
NPM3	O75607	2.04042	-0.704226	18.5262	18.1823	18.0612	17.5208	17.4811	17.6552
NT5DC2	Q9H857-2;Q9H857-3	3.12496	-0.704523	14.5003	14.6738	14.5392	13.9739	13.8321	13.7937
PTPN1	P18031	1.29312	-0.705777	13.6935	13.5038	13.1348	12.8751	12.9885	12.3511
DSG1	Q02413	0.439925	-0.708284	16.4814	17.5879	18.7261	17.3632	16.592	16.7154
TRAPPC1	Q9Y5R8	0.491649	-0.708948	12.989	15.0702	13.8725	13.4707	12.9161	13.4181
;VPS4B;FIGNL1;FIGNL1;VPS4A	I3L4J1;O75351;Q6PIW4;Q6PIW4-2;Q9UN37	1.32326	-0.709008	14.97	14.6471	14.5047	13.6584	13.9555	14.3809
GPD2	P43304	2.14556	-0.714385	15.3154	14.8937	14.9206	14.3357	14.3877	14.2632
PRDX3	P30048;P30048-2	2.794	-0.714685	18.569	18.7415	18.5515	17.9442	18.0069	17.7669
PSMC4	P43686;P43686-2	0.822224	-0.715816	11.3133	12.6716	12.0399	11.3296	11.4318	11.116
LMNB1	E9PBF6;P20700	2.90262	-0.717411	15.1369	15.0351	15.039	14.1933	14.4014	14.4641
EXOSC3	Q9NQT5;Q9NQT5-2	1.16489	-0.718842	15.2436	14.5219	14.8482	14.3591	13.7492	14.3489
ZNF326	A0A0A0MRN4;E2QRN4;Q5BKZ1;Q5BKZ1-2	0.648288	-0.722195	12.9209	13.3518	13.2401	11.6442	12.3769	13.3253
TPI1	P60174;P60174-3	0.352618	-0.723411	12.4423	13.3439	13.6685	12.9578	10.9115	13.4152
UQCR10	Q9UDW1	0.55572	-0.725692	15.5247	16.3711	14.4875	14.3967	15.0741	14.7354
VCP	A0A7I2V540;A0A7P0T8A3;A0A7P0T8Q5;A0A7P0TAQ1;A0A7P0TAW3;A0A7P0Z4C6;C9JUP7;P55072	0.697562	-0.726116	12.3188	13.4267	13.2539	12.3128	11.6894	12.8188
CSNK1D	H7BYT1;P48730;P48730-2	0.980822	-0.730035	12.0074	12.9089	12.477	11.6953	11.3531	12.1548
GTF3C5	Q5T7U1;Q9Y5Q8;Q9Y5Q8-2;Q9Y5Q8-3	0.201142	-0.730323	11.2769	13.428	9.39103	12.113	10.2907	9.5013
MTDH	Q86UE4	0.1893	-0.731132	9.75338	12.6508	7.85812	8.41421	9.58511	10.0696
PAK4;PAK4;PAK4;PAK4;PAK6;PAK6;PAK5	O96013;O96013-2;O96013-3;O96013-4;Q9NQU5;Q9NQU5-2;Q9P286	0.801446	-0.731911	12.4244	12.4692	12.2109	12.0687	12.0326	10.8075
EIF3F	H0YDT6;O00303	0.312154	-0.732045	17.0018	19.4917	16.5258	16.5674	16.7943	17.4615
ATP5MF-PTCD1;ATP5MF;ATP5MF-PTCD1;ATP5MF;ATP5MF;ATP5MF;ATP5MF	C9JJT5;C9JU26;G3V325;P56134;P56134-2;P56134-3;P56134-4	1.5488	-0.735567	15.6128	14.9472	15.3283	14.3547	14.6816	14.6452
SERPINB12	Q96P63;Q96P63-2	0.301993	-0.735881	13.5197	16.0546	16.3909	15.3853	14.1427	14.2296
FAM118A	B0QY29;Q9NWS6	0.338774	-0.736189	10.0461	11.764	10.6065	11.2622	8.70823	10.2377
SRSF3	P84103;P84103-2	0.519281	-0.736478	19.4212	20.1234	18.1319	18.4154	18.1525	18.8991
MVD	P53602	1.49982	-0.737398	15.0114	15.1948	14.6816	14.046	14.5669	14.0628
SESTD1	C9J4X8;C9JHW6;F8WFB2;Q86VW0	0.894474	-0.741817	10.9029	10.5947	10.2621	9.58702	9.42947	10.5177
VPS51	H0YDX9;H0YEE1;Q9UID3;Q9UID3-2	0.345488	-0.752205	10.872	11.459	11.7392	11.4093	11.5291	8.87525
PML	H3BT57;P29590;P29590-10;P29590-11;P29590-12;P29590-13;P29590-14;P29590-2;P29590-3;P29590-4;P29590-5;P29590-8;P29590-9	0.627168	-0.752771	13.0563	14.2855	12.9569	12.8641	13.1383	12.038
EIF2B4	A0A087WTA5;A0A087WW69;E7ERK9;F8W8L6;Q9UI10;Q9UI10-2;Q9UI10-3	0.353779	-0.75777	10.5192	12.471	9.84581	10.826	9.40462	10.332
ARG1	P05089;P05089-2	0.373592	-0.760681	14.3147	16.2316	16.9894	15.6992	14.8005	14.754
KRT33A	O76009	0.0663772	-0.764834	21.5402	15.4667	12.9972	17.4017	9.91983	20.388
;TGM3	A0A494C0J7;Q08188	0.590303	-0.769614	14.9094	15.3995	16.1976	15.3028	13.8551	15.0397
ILVBL	A1L0T0;M0R026	1.69196	-0.769938	13.008	12.5214	12.7079	12.0356	11.691	12.2008
ISCA2	Q86U28	0.603549	-0.7705	13.1428	14.5753	13.8744	13.8835	12.7121	12.6855
SPR	P35270	1.39656	-0.772596	13.5994	13.5149	13.075	13.0244	12.4183	12.4289
PRDX6	P30041	2.35749	-0.773311	17.117	17.0758	16.9261	16.129	16.1645	16.5055
AKT1S1	Q96B36	1.77424	-0.774463	14.3927	13.7864	13.895	13.3522	13.1444	13.2542
USP11	G5E9A6;P51784	1.15591	-0.774667	14.6334	15.0598	14.0375	14.0158	13.6846	13.7063
JPT2	A6NGP5;H3BU16;Q9H910;Q9H910-2;Q9H910-3	0.704731	-0.776436	13.8017	14.5415	12.8408	12.7487	13.0381	13.0679
DDX39A;DDX39B;DDX39B;DDX39B	O00148;Q13838;Q13838-2;Q5STU3	0.882936	-0.777241	14.2621	15.6303	14.6405	13.9857	14.1258	14.0897
PRDX5	P30044;P30044-2;P30044-3;P30044-4	0.150651	-0.777809	9.07244	15.2406	12.4664	12.5946	10.1205	11.731
TFRC	P02786	2.14186	-0.781899	14.06	14.4549	13.9467	13.3595	13.4015	13.3548
HEXB	P07686	0.922526	-0.781978	12.5106	13.6579	12.6777	12.2502	11.8403	12.4098
NOL3	H3BM67;H3BUN4;H3BUP2;O60936;O60936-3	2.40006	-0.783599	13.9352	13.7798	13.8699	13.1538	12.8365	13.2438
SPAG7	O75391	0.738107	-0.784539	11.618	11.7623	11.8664	11.6978	10.0557	11.1397
NUP98	P52948;P52948-2;P52948-5	0.822165	-0.784541	12.5254	12.8375	12.1418	12.3346	11.8311	10.9854
NUP153	P49790;P49790-2;P49790-3	0.476263	-0.78633	12.1638	12.8141	12.2355	12.1948	10.2514	12.4083
COPG1	Q9Y678	2.60294	-0.787069	12.9332	13.0498	12.7782	11.9827	12.1375	12.2798
UBLCP1	Q8WVY7	1.14174	-0.788836	11.2801	12.2925	11.5063	10.9953	10.6909	11.0261
MID1IP1	Q9NPA3	1.27797	-0.78934	14.8002	13.8669	14.2701	13.7255	13.3779	13.4658
PALLD	Q8WX93;Q8WX93-3;Q8WX93-4	2.25942	-0.792622	18.2112	17.8981	17.8094	17.0505	17.3241	17.1662
EPRS1	P07814	3.88922	-0.795011	15.3117	15.342	15.429	14.5464	14.5054	14.6459
DCTN2	A0A7I2V4H4;A0A7I2V4Y9;A8K8J9;F8W1I6;H0YHL1;Q13561;Q13561-2;Q13561-3	1.86585	-0.796071	11.2848	11.003	11.4382	10.4688	10.676	10.1931
VARS1	P26640	2.1832	-0.798458	14.858	14.6003	14.8976	13.7582	14.0254	14.1769
SDE2	Q6IQ49;Q6IQ49-2	0.59745	-0.798896	16.1156	17.7055	15.7917	15.8637	15.563	15.7894
HRNR	Q86YZ3	0.558945	-0.800855	17.2781	17.2352	19.0682	17.2662	16.6645	17.2483
DIAPH1	A0A0G2JH68;A0A140T8Z0;A0A2R8Y5N1;H9KV28;O60610;O60610-2;O60610-3	0.638401	-0.801708	13.0748	11.5555	11.7735	10.7228	11.5445	11.7314
H1-0	P07305	1.05063	-0.802295	12.9597	13.6448	12.722	12.325	11.9019	12.6927
GNA14;GNA11;GNAQ	O95837;P29992;P50148	2.17503	-0.805257	14.4405	14.0767	14.3913	13.7105	13.3896	13.3927
NACA	A0A7I2V2K5;A0A7I2V473;E9PAV3;E9PAV3-2;F8VZJ2;H0YHX9;Q13765	0.373118	-0.805412	12.7789	14.5927	11.713	12.8784	12.0049	11.7851
MLKL	I3L4A6;Q8NB16	0.607344	-0.807848	11.8094	11.179	10.506	9.59106	10.2905	11.1893
PSMA7	H0Y586;O14818;O14818-2	1.27659	-0.810329	14.5015	13.6391	14.0759	12.9824	13.5478	13.2553
CREG1	A0A3B3IRL2;O75629	0.396697	-0.812219	13.5801	10.8748	12.1525	10.7713	11.3413	12.0581
DSC1	Q08554-2	0.447221	-0.81807	15.1657	16.7868	17.6867	16.2747	15.4364	15.4739
LRRC59	Q96AG4	0.627568	-0.818941	14.5017	16.407	15.375	15.0104	14.3393	14.4772
KRT19	P08727	0.637216	-0.819598	17.7037	19.238	18.6878	18.3054	17.0435	17.8218
CANX	A0A7P0T840;A0A7P0T8G1;A0A7P0T937;A0A7P0T9L0;A0A7P0TAE9;A0A7P0TB65;A0A7P0Z4D6;P27824;P27824-2	1.17258	-0.824855	14.5202	13.6046	14.2744	12.9533	13.5811	13.3903
AHSA1	G3V438;H0YJ63;H0YJG7;O95433;O95433-2	0.691536	-0.826743	11.0681	12.6331	12.4616	10.8058	11.3012	11.5756
SRSF4	A0A0D9SEM4;Q08170	0.849316	-0.827626	13.2178	12.4321	11.9409	11.1926	12.0263	11.889
TRIM72	Q6ZMU5	0.509757	-0.829212	9.77794	10.925	9.69621	8.22753	10.2688	9.41525
PIK3CB	P42338	0.268052	-0.829373	12.5514	11.827	13.2348	12.5483	9.39899	13.1778
C19orf25	K7EK56;Q9UFG5;Q9UFG5-2	1.49859	-0.829384	13.5028	13.865	13.5742	13.2622	12.7052	12.4864
KRT78	Q8N1N4	0.561961	-0.832263	18.9909	20.1989	21.0493	19.7944	18.93	19.018
NUDT21	O43809	0.328006	-0.83405	11.3599	13.7712	11.61	11.9855	9.99605	12.2575
GRWD1	Q9BQ67	0.396676	-0.836445	12.5541	14.4233	12.4307	13.0424	12.7786	11.0778
TRMT1L	Q7Z2T5;Q7Z2T5-2	1.7134	-0.837277	11.9338	11.5492	11.3338	10.6346	11.0376	10.6327
NUP160	E9PR16;G3V198;Q12769	1.45872	-0.840047	12.0109	12.6854	12.192	11.5525	11.1153	11.7004
DDX6	P26196	0.893627	-0.844331	13.0916	14.4587	13.3598	13.0648	12.6976	12.6148
RANBP1	C9JDM3;C9JGV6;C9JIC6;C9JJ34;C9JXG8;F6WQW2;P43487;P43487-2	0.413474	-0.851063	13.1855	15.7199	13.1938	13.6275	13.0837	12.8349
PAF1	Q8N7H5;Q8N7H5-3	1.06753	-0.856936	12.3563	12.9209	12.3236	11.7092	11.1005	12.2203
MRPL41	Q8IXM3	0.356068	-0.85719	11.5645	12.2611	12.1233	9.22561	12.4854	11.6663
SERPINB4	P48594	0.34945	-0.857208	12.3349	15.3866	14.8439	13.9169	12.5884	13.4885
DNAAF5	Q86Y56	1.46421	-0.859174	12.4476	13.323	12.6923	11.8057	12.027	12.0527
HNRNPA1	A0A7I2V3R8;F8W6I7;P09651;P09651-2;P09651-3	0.428288	-0.864587	14.9582	17.0781	14.6111	15.2985	13.969	14.7861
HSPA4	A0A087WTS8;A0A087WYC1;P34932	2.95327	-0.866161	13.4749	13.3015	13.4093	12.7031	12.4005	12.4835
CAPN2	P17655	1.44387	-0.866762	12.7325	13.6129	12.8557	12.2271	12.1112	12.2625
AP3D1	A0A2R8Y611;O14617;O14617-2;O14617-3;O14617-4;O14617-5	1.3544	-0.873208	11.4391	10.7973	11.3924	9.89838	10.5765	10.5343
HEATR1	Q5T3Q7;Q9H583	0.585532	-0.876371	9.96858	10.8822	10.7226	10.324	8.43984	10.1804
ALDH9A1	P49189;P49189-3	0.824325	-0.881661	12.0912	13.5619	13.4134	11.8209	12.2319	12.3687
NUP85	F5H0W7;J3KT10;J3QL54;J3QL91;J3QLH0;J3QS63;Q9BW27;Q9BW27-2;Q9BW27-3	0.814311	-0.885934	14.67	13.7039	14.1568	13.7741	13.6428	12.456
CPOX	P36551	3.19089	-0.887733	16.3	16.0863	16.095	15.1685	15.2737	15.3758
SART3	A0A499FI31;Q15020;Q15020-2;Q15020-4	0.547528	-0.888669	11.3752	11.0055	11.9687	11.3946	9.25616	11.0327
TRAP1	Q12931;Q12931-2	3.7582	-0.892385	14.0339	13.99	14.1251	13.1859	13.0549	13.231
YWHAG	P61981	0.188229	-0.892604	11.1343	14.561	11.335	13.2767	12.4518	8.62404
ANKRD40	Q6AI12	0.189999	-0.89524	13.9929	9.64896	12.5863	8.64806	12.263	12.6313
SCD	O00767	0.683003	-0.896117	13.0815	11.5453	13.4297	11.837	12.0118	11.5193
SPC24	A0A0A0MSN0;K7EJH0;K7EJV2;K7EMX1;K7ERQ7;K7ESQ2;Q8NBT2;Q8NBT2-2	1.03381	-0.89676	10.3673	10.649	10.3774	8.77437	9.9516	9.97739
POF1B	Q8WVV4;Q8WVV4-1	0.383336	-0.898239	12.66	14.3041	15.7797	13.9929	12.6174	13.4388
HNRNPD	D6RAF8;D6RF44;H0Y8G5;H0YA96;Q14103;Q14103-2;Q14103-3;Q14103-4	0.393183	-0.89868	10.1084	9.71562	12.0988	10.0521	8.54386	10.6308
DRG1	Q9Y295	2.1818	-0.904712	14.3092	14.3388	13.8035	13.229	13.2304	13.278
AIMP2	A8MU58;Q13155;Q13155-2	0.415729	-0.905241	11.4709	14.391	12.8967	12.7444	11.4388	11.8596
KRT2	P35908	0.98737	-0.906628	20.9935	21.3911	22.3882	20.9143	20.5738	20.5648
PNP	P00491	0.199901	-0.910216	8.93873	14.114	13.6716	12.3213	10.327	11.3454
KPRP	Q5T749	0.943979	-0.911114	17.548	17.9378	18.9335	17.5952	17.0278	17.0631
DECR2	Q4VXZ8;Q9NUI1	2.19571	-0.91202	13.8479	13.4298	13.3789	12.716	12.4588	12.7457
MAIP1	H7C0V0;Q8WWC4	0.540366	-0.913064	9.74527	11.291	8.80133	9.37715	8.89199	8.82931
UQCRH	P07919	2.07561	-0.915316	14.6513	14.5864	14.3388	13.9365	13.4309	13.4632
SDHB	P21912	1.85686	-0.915469	15.7629	15.9497	15.3743	14.5487	14.7638	15.028
MRPL10	Q7Z7H8;Q7Z7H8-2	0.854082	-0.918965	11.0438	10.2796	11.4932	10.0337	10.6241	9.40195
PLCB3	Q01970;Q01970-2	0.850022	-0.923526	12.6887	14.0615	12.994	11.9718	12.112	12.8898
IMMT	A0A087WYS0;B9A067;D6RAW4;Q16891;Q16891-2;Q16891-3;Q16891-4	0.495377	-0.924867	9.07793	10.8467	11.4588	8.95869	9.36499	10.2851
FOXRED1	Q96CU9;Q96CU9-3	1.35561	-0.924907	12.118	11.5037	11.7019	10.6864	11.3634	10.499
GATD1	E9PLI5;E9PQD8;H0YE25;H0YF25;Q8NB37;Q8NB37-2	1.29022	-0.925104	13.0433	12.273	12.6558	11.6795	11.3244	12.1928
NMT1;NMT2;NMT1;NMT1;NMT2	A0A7I2V539;O60551;P30419;P30419-2;Q5VUC6	0.404804	-0.926943	11.4501	11.5738	9.09297	10.7653	8.90731	9.66346
ACSL3	A0A7P0T8L6;A0A7P0TA76;A0A7P0TBB1;O95573	0.993939	-0.928192	13.239	14.635	14.2057	12.8314	13.1289	13.3348
IBA57	Q5T440	2.05749	-0.928485	14.6909	14.2161	14.2369	13.4161	13.6713	13.271
ZWILCH	Q9H900;Q9H900-2	1.3272	-0.929321	13.1011	13.8412	13.0614	12.8108	12.2795	12.1254
CALCOCO1	Q9P1Z2;Q9P1Z2-2;Q9P1Z2-3;Q9P1Z2-4	0.70355	-0.934173	11.3079	10.5692	11.5356	10.6477	10.8165	9.14608
WFDC12	Q8WWY7	0.81976	-0.939822	14.2538	14.3115	14.6067	14.4114	12.6272	13.3139
NDUFV2	E7EPT4;P19404	0.371598	-0.943973	11.7456	11.9337	9.99476	11.0569	8.55106	11.2341
CTR9	Q6PD62	0.921826	-0.952126	11.9574	12.7333	11.7209	10.4831	11.3158	11.7562
FLG	P20930	0.395108	-0.953162	12.1852	14.5561	15.428	13.7358	12.7813	12.7928
TRUB1	Q8WWH5	0.433791	-0.96311	12.0103	9.85968	11.4549	11.4441	9.94237	9.04915
VPS35	Q96QK1	0.767062	-0.964607	11.4092	10.5569	10.6163	10.4666	10.3423	8.87966
TMPO	G5E972;P42167	0.216191	-0.965029	9.44626	12.9308	7.51639	8.29819	10.4176	8.28264
NTPCR	Q5TDF0;Q9BSD7	0.293817	-0.967223	13.9373	9.94449	13.5412	10.6961	11.9451	11.8801
POLR2E	A0A087WVN5;A0A087WVZ9;A0A087WWX0;A0A0A0MQR7;P19388	0.268609	-0.969721	16.8652	13.7999	13.1717	12.6824	12.8336	15.4116
SSR4	P51571	1.98586	-0.969937	13.9039	14.1746	14.4222	13.3895	13.3023	12.899
LORICRIN	P23490	0.652836	-0.972913	14.3689	15.0552	16.487	14.8401	14.0498	14.1024
KRT80	Q6KB66;Q6KB66-2	0.994228	-0.974595	15.3091	16.2361	16.5374	15.492	14.5512	15.1156
SPRYD4	Q8WW59	0.668611	-0.975283	12.9606	12.047	12.3045	12.3225	11.764	10.2996
DEK	A0A494C028;B4DFG0;H0Y993;P35659;P35659-2	1.07157	-0.977549	14.9175	15.6223	14.2773	14.1237	13.5989	14.1619
S100A6	P06703;R4GN98	0.448504	-0.98282	15.2327	17.6199	14.7487	15.5088	14.4668	14.6772
SND1	Q7KZF4	1.09017	-0.989366	14.5157	15.2172	13.869	13.6442	13.7847	13.2048
;LDHB;LDHB;LDHB;LDHB	A0A3B3IS95;A0A5F9ZHM4;A8MW50;C9J7H8;P07195	0.854831	-0.994913	12.7636	13.638	11.994	11.4455	11.6588	12.3066
PRKAG1	F8VPF5;F8VYY9;P54619;P54619-2;P54619-3	0.461944	-0.997012	11.8982	10.993	11.0218	8.61833	10.7002	11.6035
ACAD9	A0A7P0T7Z1;A0A7P0T871;A0A7P0T8U3;A0A7P0TB58;H0Y8Z9;Q9H845;Q9H9W4	0.501052	-1.01518	10.5505	9.16939	10.1404	8.50441	10.4618	7.84848
SRSF2	J3KP15;J3QL05;Q01130;Q01130-2	0.552024	-1.01637	16.7111	18.2776	15.4751	15.677	15.7735	15.9642
HNRNPA0	Q13151	0.710111	-1.01642	14.0447	16.0131	14.1241	13.6739	13.5311	13.9276
NDC1	Q9BTX1;Q9BTX1-2;Q9BTX1-4;Q9BTX1-5;Q9BTX1-6	0.431874	-1.01669	11.8156	9.62904	11.2351	9.25445	8.97476	11.4005
RNMT	K7EP06;O43148;O43148-2	1.27323	-1.01948	13.6962	14.4517	13.8746	13.4584	13.0712	12.4345
GLRX	P35754	0.786649	-1.02033	13.7427	13.6175	14.4019	13.544	13.3443	11.8128
SLC7A5	Q01650	1.33502	-1.02077	14.1004	13.6468	14.1414	12.6216	12.6212	13.5835
PPIL1	Q9Y3C6	0.889	-1.02947	14.7801	13.9868	13.2958	12.4621	13.5908	12.9213
TSEN34	A0A590UJ73;A0A590UJW4;E7EQB3;Q9BSV6	1.20595	-1.03715	14.5172	13.7414	13.7637	13.5975	12.6572	12.6561
GNAQ	B1AM21	0.201321	-1.03883	11.12	14.58	16.0755	15.5627	11.7322	11.3641
JCHAIN	C9JA05;D6RD17;D6RHJ6;P01591	0.208315	-1.04036	10.2109	14.5721	12.5355	9.53283	10.3738	14.2908
KRT10	P13645	1.31202	-1.04073	20.8364	21.6231	21.837	20.6899	19.9783	20.506
TGM1	P22735	0.948459	-1.04105	13.7816	14.7734	14.8181	14.1885	13.0664	12.9951
KRT23	Q9C075	0.746765	-1.05004	13.563	13.5698	15.3371	13.6174	12.9485	12.754
ASNS	P08243;P08243-2	3.89231	-1.05982	15.4327	15.4674	15.2687	14.3288	14.3977	14.2628
ANAPC10	Q9UM13	0.744707	-1.06107	15.9886	13.9342	14.2205	13.4129	13.8128	13.7345
HP1BP3	Q5SSJ5	1.16834	-1.06267	12.9644	13.4798	12.5185	11.9805	12.4583	11.3358
GMNN	E2QRF9;O75496	0.979552	-1.06421	10.2481	10.3655	9.0712	8.67619	9.40549	8.4105
;ATP5MG;ATP5MG	A0A3B3ITX4;E9PN17;O75964	1.3683	-1.06554	14.7503	14.381	14.5338	12.9299	13.4121	14.1264
TOLLIP	E7EN89;E9PP67;E9PQ25;F2Z2Y8;Q9H0E2;Q9H0E2-2	0.338195	-1.07448	9.0965	11.359	13.4058	10.4095	10.8166	9.41163
ALDOA	H3BMQ8;H3BPS8;H3BQN4;H3BR04;H3BUH7;J3KPS3;P04075;P04075-2	0.855499	-1.0753	16.8363	15.5077	14.8824	14.5473	14.5948	14.8585
PRDX4	Q13162	1.73417	-1.07606	13.3941	13.5461	13.61	12.7948	12.623	11.9043
RCC1	P18754;P18754-2	0.953737	-1.08889	13.2286	13.5346	12.4888	12.3487	12.5067	11.13
S100A4	P26447	0.39608	-1.0969	13.1232	10.6029	12.8991	10.9661	12.6498	9.7186
P4HB	A0A7P0T8C0;A0A7P0T8J3;A0A7P0T8X1;A0A7P0T9D6;A0A7P0T9U6;A0A7P0TA35;A0A7P0TA71;A0A7P0TA97;A0A7P0TB26;H0Y3Z3;H7BZ94;I3L0S0;I3L4M2;I3L514;P07237	0.491749	-1.10356	12.6457	15.3333	12.3582	12.0782	12.1207	12.8277
ALOX12B	O75342	0.776338	-1.10456	11.7663	13.019	13.6866	12.3261	11.1642	11.6678
PSMB5	P28074	3.21549	-1.11276	14.0712	14.0324	14.3875	13.0257	13.081	13.0461
KDM1A	O60341;O60341-2;R4GMQ1	1.11089	-1.13054	13.7222	13.3851	13.7547	11.5656	12.8883	13.0165
AKAP12	Q02952;Q02952-2;Q02952-3	1.23014	-1.13062	13.3659	14.6876	13.5335	12.9014	12.7873	12.5064
KRT13	P13646	1.28664	-1.13341	18.6566	19.4101	18.636	17.8623	17.1629	18.2773
NAA40	F5H2C9;Q86UY6;Q86UY6-3	0.457455	-1.13392	12.6723	10.3103	11.0843	10.2018	11.639	8.82432
PSMA6	G3V5Z7;P60900;P60900-2	1.86389	-1.13854	13.2446	13.2694	13.6459	12.2609	12.6536	11.8298
LCE2B;LCE2A;LCE2C;LCE2D	O14633;Q5TA79;Q5TA81;Q5TA82	0.828041	-1.1403	10.12	10.0739	9.94555	10.1051	7.93775	8.67576
SERPINB8	P50452	0.446554	-1.14217	11.3081	11.7605	13.6575	12.6863	10.7385	9.87475
SRP9	P49458	0.47864	-1.14265	13.16	16.4004	13.5825	13.6202	13.1501	12.9445
BAIAP2	B4DWA1;I3L4C2;Q9UQB8;Q9UQB8-2;Q9UQB8-3;Q9UQB8-4;Q9UQB8-5;Q9UQB8-6	1.42496	-1.14442	13.6488	13.7276	12.9638	11.9242	12.8593	12.1234
HAL	P42357;P42357-2	0.905501	-1.14639	11.8647	13.1373	13.3732	12.3641	11.2521	11.3199
MCM4	A0A3B3IT92;A0A3B3IU45;E5RG31;P33991	0.795911	-1.1514	12.5851	13.2907	11.4731	12.0919	10.7353	11.0675
PNPLA6	A0A384DVU0;Q8IY17;Q8IY17-2;Q8IY17-3;Q8IY17-5	0.910414	-1.15324	12.424	11.7002	11.6022	11.8022	10.0714	10.3931
ITCH	A0A1W2PR79;A0A590UJQ1;A0A590UJW8;A0A590UK44;A0A590UK95;Q96J02;Q96J02-2	0.442821	-1.15409	10.4354	10.681	10.495	11.6165	8.28346	8.24923
EIF2B3	Q9NR50;Q9NR50-2;Q9NR50-3	1.58051	-1.15554	13.1001	12.5595	12.3168	11.8698	11.0429	11.597
NARS1	O43776	1.42717	-1.15658	13.0884	12.7816	12.4436	11.621	12.1794	11.0435
CLPB	A0A2U3TZY2;H0YGM0;Q9H078;Q9H078-2;Q9H078-4	0.788192	-1.16356	11.4832	10.1911	11.0622	10.7069	9.78858	8.75027
ANXA10	Q9UJ72	1.07564	-1.17311	9.72722	11.0024	9.51585	8.82526	8.58104	9.31986
TXN2	Q99757	1.14448	-1.18082	14.8339	16.1973	14.9298	14.5365	14.0357	13.8463
EIF5B	A0A087WUT6;O60841	2.03627	-1.18343	9.63511	10.4348	9.97934	8.69243	8.78848	9.01807
PSMB1	P20618	0.578902	-1.1859	10.1024	11.606	11.8545	11.4574	9.16686	9.38093
SNRNP27	B8ZZ98;Q8WVK2	0.181826	-1.18621	10.2862	15.907	8.92627	12.86	8.5066	10.1943
SMC2	O95347;O95347-2;Q5T821	0.88532	-1.18897	11.5608	10.4764	11.4064	9.34057	9.53071	11.0055
GLG1	H3BM42;Q92896;Q92896-2;Q92896-3	1.9928	-1.19097	13.0492	13.2002	13.1866	12.2075	11.4436	12.2121
CRCT1	Q9UGL9	0.49499	-1.20194	8.59505	9.75322	11.8315	9.24882	9.41256	7.91256
CAT	P04040	1.18689	-1.20311	14.2527	14.9415	15.5443	14.1917	13.1698	13.7677
LYZ	A0A0B4J259;F8VV32;P61626	0.541194	-1.20321	15.406	16.465	14.9463	14.8499	12.7176	15.6401
TGM5	A0A087WVW4;A0A087WZC4;O43548;O43548-2	0.966525	-1.20366	12.4567	13.2502	14.3496	12.4833	11.7995	12.1626
PSMA3	P25788;P25788-2	1.55724	-1.21022	14.4539	13.6377	14.2472	12.416	13.3083	12.9838
FLG2	Q5D862	1.2288	-1.21148	15.6754	16.4629	17.1202	15.4633	14.8135	15.3474
G3BP2	A0A7I2V382;A0A7I2V3P9;A0A7I2V647;A0A7I2YQD9;Q9UN86;Q9UN86-2	0.750176	-1.21251	13.0689	11.2491	12.1313	11.4185	11.5039	9.88946
SRP14	P37108	1.55467	-1.21289	15.4594	16.6098	15.6281	14.7167	14.6942	14.6476
SERPINA12	Q8IW75	0.579918	-1.25942	9.11441	11.2541	12.2104	9.73499	10.0656	9.00004
EIF2S1	P05198	0.23217	-1.28142	8.8292	15.8276	11.2963	11.5837	9.31826	11.2069
EEF1E1-BLOC1S5;EEF1E1;EEF1E1;EEF1E1	C9J1V9;D6RBD7;O43324;O43324-2	0.978867	-1.28198	13.6658	13.5467	13.0041	10.9704	12.6093	12.7911
PFKL	P17858	1.47225	-1.28339	12.7251	13.5644	13.5468	11.5861	11.8331	12.567
AZGP1	P25311	0.612504	-1.28465	13.5413	15.6222	14.0091	14.1501	11.7786	13.3899
CYRIB	Q9NUQ9	0.61591	-1.28609	13.4834	15.5383	12.6434	13.305	12.4744	12.0274
APEX2	Q9UBZ4	0.836266	-1.29681	11.6382	10.1907	10.3569	8.70337	9.06989	10.5221
C8orf82	H0YF29;Q6P1X6;Q6P1X6-2	1.34192	-1.29819	14.8495	13.6279	14.114	12.3755	13.3351	12.9861
SPRR1B	P22528	1.11694	-1.30064	17.0519	17.3822	17.9163	16.5959	15.178	16.6746
PPIB	A0A7P0Z497;P23284	0.777686	-1.30217	15.442	17.3926	15.1108	15.1416	14.1218	14.7755
DEFA1B;DEFA3	P59665;P59666	0.364803	-1.33131	12.8877	13.866	13.4729	12.4048	9.3358	14.4921
ELOVL1	Q9BW60;Q9BW60-2	0.814457	-1.33331	11.9873	11.3296	12.1852	11.1178	9.08025	11.3041
ASB6	F6TX30;Q9NWX5;Q9NWX5-2	1.23491	-1.34088	11.1144	9.63259	10.7274	9.52985	9.24661	8.67524
KPNA1	P52294	1.8493	-1.35374	13.8664	13.7494	13.958	13.1436	12.1984	12.1706
GSDMD	G3V1A6;P57764	1.16268	-1.36596	14.5167	13.2665	12.9094	12.3012	11.7048	12.5887
SPRR1A	P35321	0.645966	-1.38965	11.6684	13.7018	14.0186	12.9666	10.8464	11.4069
POLDIP3	F6VRR5;Q9BY77;Q9BY77-2	0.514193	-1.39113	11.7939	13.4537	11.6905	12.6579	9.06199	11.0449
CS	A0A0C4DGI3;B4DJV2;H0YIC4;O75390	1.13695	-1.39174	12.5225	11.5802	10.7089	9.79153	10.6195	10.2253
TES	F8W7T0;Q9UGI8;Q9UGI8-2	0.837795	-1.39568	11.6109	11.8976	11.3175	10.1796	11.5364	8.92305
GSDMA	Q96QA5	0.946207	-1.41504	13.0207	12.9976	13.6251	12.9292	10.6142	11.8549
NEU2	Q9Y3R4	0.839696	-1.41582	9.95712	9.5939	11.6224	9.40474	9.48759	8.03365
SUB1	P53999	0.759361	-1.42622	15.3521	15.6713	13.0831	13.0643	12.9202	13.8432
HAGH	H3BPK3;H3BPQ4;Q16775;Q16775-2	0.730462	-1.45253	12.0614	10.1849	10.841	8.60962	10.9986	9.12153
PYCR2;;PYCR2	A0A087WTV6;J3KR12;Q96C36	0.805515	-1.45762	13.5277	10.8683	12.9411	10.6418	10.9193	11.4031
TRMT2B	Q96GJ1;Q96GJ1-2;Q96GJ1-3	0.899731	-1.46393	11.5779	11.1954	11.6382	10.5927	8.52496	10.902
;MUTYH;MUTYH;MUTYH;MUTYH;MUTYH;MUTYH;MUTYH;MUTYH;MUTYH;MUTYH	A0A5F9ZGZ0;A0A5F9ZI14;E9PM53;Q5T413;Q5T418;Q9UIF7;Q9UIF7-2;Q9UIF7-3;Q9UIF7-4;Q9UIF7-5;Q9UIF7-6	1.17574	-1.46567	12.4701	11.6018	11.1975	11.1384	10.1297	9.6044
PYCR1	E2QRB3;P32322;P32322-2	1.05962	-1.46573	14.8456	14.2901	14.6961	13.4578	14.0427	11.9341
NONO	A0A7I2V4J2;A0A7I2V535;A0A7I2V5Y7;Q15233	0.70811	-1.46741	14.0734	16.8767	14.3894	14.2401	13.0981	13.5991
DLST	P36957;P36957-2	2.35961	-1.47206	14.9772	14.2077	14.2466	13.0671	13.017	12.9313
HNRNPAB	D6R9P3;D6RBZ0;D6RD18;Q99729;Q99729-2;Q99729-3;Q99729-4	0.479707	-1.47348	10.7086	12.6582	11.6301	11.3955	7.7733	11.4077
EWSR1	B0QYK0;Q01844;Q01844-3;Q01844-5;Q01844-6	0.395796	-1.47502	12.0152	15.6747	11.8929	13.1265	9.85945	12.1717
UPP1	Q16831	0.418422	-1.47909	11.2935	13.3518	11.4328	10.0942	8.46572	13.081
NABP2	C9JMP5;C9JT95;Q9BQ15	1.53487	-1.48239	11.2912	12.1747	11.8234	9.90269	11.0087	9.93078
RNF2	Q99496;Q99496-2;X6RFN3	1.15593	-1.49974	11.6431	11.4602	10.7625	9.72728	8.87203	10.7673
DHX16	A0A140T947;O60231	1.16958	-1.50311	11.4779	12.349	11.1876	9.37524	11.0733	10.0567
ACSL5	Q9ULC5;Q9ULC5-3	2.31782	-1.50713	14.1538	13.531	14.1016	12.1809	12.3184	12.7658
ODC1	P11926	1.76957	-1.50959	15.1729	14.1283	14.0843	13.2191	12.7296	12.9081
KRTAP11-1	Q8IUC1	0.151114	-1.51476	16.8295	9.46977	9.36082	6.90281	8.28653	15.9265
UBA3	F8W8D4;Q8TBC4;Q8TBC4-2	0.506134	-1.5464	10.6535	8.61559	9.06237	9.07681	5.52675	9.08871
ITPRID2	E9PHV5;P28290;P28290-2;P28290-3	3.96092	-1.56085	14.8251	14.7828	14.6058	13.0924	13.1065	13.3323
AP2S1	M0QYZ2;M0QZ21;M0R0N4;M0R1S0;P53680;P53680-2;X6R390	0.767492	-1.57246	11.1568	12.2138	11.4401	11.5441	8.46678	10.0824
XP32	Q5T750	1.77119	-1.57912	16.0711	16.8795	16.8988	15.617	14.6678	14.8273
CYCS	C9JFR7;P99999	0.868539	-1.59015	11.1048	12.9331	10.4299	9.72063	9.29862	10.678
KRT27;KRT25	Q7Z3Y8;Q7Z3Z0	0.505012	-1.59151	12.8735	10.9218	12.6075	12.8455	8.6139	10.1688
PSMC6	A0A087X2I1;P62333	1.90455	-1.6012	13.2919	12.855	13.6391	11.6951	12.1507	11.1365
PDLIM5	Q96HC4	2.4381	-1.63148	15.6416	16.3709	15.5987	14.421	14.1144	14.1814
SARS2;SARS2;SARS2;;SARS2;SARS2	M0QWZ7;M0QX29;M0R259;M0R2C6;Q9NP81;Q9NP81-2	0.778537	-1.6382	8.92966	12.1833	9.8788	8.58035	8.86583	8.63095
ECM1	Q16610;Q16610-2;Q16610-4	1.27306	-1.64148	13.6905	13.949	15.373	13.1339	12.8416	12.1125
SYPL1	C9JYN0;Q16563;Q16563-2	1.10204	-1.69297	14.9596	16.8601	14.8369	14.0626	14.2553	13.2598
BAG3	C9JFK9;O95817	0.900404	-1.70395	11.811	13.0147	11.7232	11.9678	10.1278	9.34147
SLC1A5	Q15758	1.90431	-1.70669	12.1369	12.2713	12.8171	11.1023	10.9689	10.034
APEX1	G3V3M6;G3V5Q1;P27695	0.846914	-1.72294	11.7019	13.2431	11.5445	11.2968	8.89552	11.1285
NOMO1;NOMO1;NOMO1;NOMO1;NOMO3;NOMO3;NOMO3;NOMO3;NOMO3;NOMO3;NOMO3;NOMO1;NOMO2;NOMO2;NOMO2	A0A087WW46;A0A087X117;A0A0G2JN29;A0A0G2JP90;A0A7I2V2Z5;A0A7I2V3P4;A0A7I2V4D7;A0A7I2V4T6;A0A7I2V6B0;J3KN36;P69849;Q15155;Q5JPE7;Q5JPE7-2;Q5JPE7-3	1.76913	-1.73295	13.2423	14.3775	13.0867	11.5315	12.1126	11.8636
PARP1	A0A7I2V3E1;P09874	0.76303	-1.75825	10.2988	13.7889	12.7647	10.4573	10.9478	10.1726
MPG	A2IDA3;P29372;P29372-2;P29372-4;P29372-5	1.10262	-1.77131	12.9574	12.8351	11.2776	11.6323	9.94924	10.1746
LRSAM1	A0A6Q8PFL5;A0A6Q8PFT9;A0A6Q8PG02;A0A6Q8PGB2;A0A6Q8PGF7;A0A6Q8PGT8;A0A6Q8PGW1;Q6UWE0;Q6UWE0-2;Q6UWE0-3	1.05041	-1.77315	11.99	11.708	10.7743	10.8209	9.92036	8.41154
ALOXE3	J3KPH2;Q9BYJ1;Q9BYJ1-2	1.29413	-1.79534	14.2745	13.8182	15.0547	13.6658	11.9777	12.1179
PSMC3IP	K7EQS1;Q9P2W1;Q9P2W1-2	1.17044	-1.82565	13.5863	13.6279	14.6747	13.3913	11.2779	11.7428
CAND1	A0A0C4DGH5;Q86VP6;Q86VP6-2	1.138	-1.85852	9.7493	12.2381	10.6947	9.08119	8.57696	9.44838
RNF126	K7EIY6;Q9BV68;U3KQF4	0.891759	-1.88159	12.6774	13.6354	10.622	11.1044	9.65613	10.5295
DSC3	Q14574	0.75954	-1.88783	13.2408	13.8451	14.3235	13.3349	9.75163	12.6596
GSN	A0A0A0MS51;A0A0A0MT01;A0A0U1RQL8;P06396;P06396-2;P06396-3;P06396-4;Q5T0I0	1.08258	-1.92366	9.95429	11.6156	12.268	10.2019	8.5676	9.29743
SFPQ	P23246	0.768016	-1.94594	13.6822	14.5744	13.1354	13.1114	9.68389	12.7588
ERRFI1	Q9UJM3	2.55232	-1.94639	14.1153	14.9284	14.2792	12.2779	12.8139	12.3918
KLF16	Q9BXK1	1.58293	-1.94677	10.1731	11.3028	11.4577	8.29052	9.16917	9.63355
BLMH	Q13867	0.513559	-1.96848	12.6134	15.8229	14.299	14.0151	13.3125	9.50222
CASP14	P31944	1.94642	-1.98106	15.3984	14.7556	15.5503	13.7251	12.516	13.52
IRF2BPL	Q9H1B7	1.39778	-1.98491	13.2134	11.4947	11.2511	9.67604	10.4666	9.86177
ASF1B	K7ELW9;Q9NVP2	1.05189	-2.0616	10.5202	12.3579	11.5341	8.5623	8.75614	10.909
HMGB1	P09429;Q5T7C4	0.50642	-2.18868	13.4057	14.0739	8.11935	9.97554	9.37477	9.6826
HMGA1	P17096;P17096-3	0.675128	-2.20023	12.882	15.8806	11.5334	12.0904	9.76992	11.8351
LAMP1	P11279;P11279-2	0.636748	-2.20917	9.79584	12.1966	11.4982	10.5383	6.17816	10.1466
FUS	H3BPE7;P35637;P35637-2	1.39566	-2.21957	12.7786	14.2421	11.8177	11.1537	10.3637	10.6623
CEP85	H7BZW2;Q6P2H3;Q6P2H3-2;Q6P2H3-4	1.03321	-2.28011	13.517	11.1188	10.1962	8.9249	9.93386	9.13291
UBE2T	Q9NPD8	0.96543	-2.30548	14.2386	13.3701	13.5225	12.6465	9.24094	12.3273
DSC2	A0A3B3ISU0;Q02487	0.345285	-2.31278	8.13619	11.3968	8.89022	10.4306	2.03675	9.0175
LDB1;LDB2;LDB2;LDB2;LDB2;LDB2;LDB2;LDB1;LDB1;LDB1	A0A6E1WJ75;E9PFI4;G5E9Y7;H0YA09;O43679;O43679-2;O43679-3;Q86U70;Q86U70-2;Q86U70-3	1.16281	-2.31465	11.8155	12.1262	12.5067	8.79268	11.6575	9.05429
ERI1	Q8IV48	2.39053	-2.36067	14.0479	14.2951	14.046	12.5019	11.1722	11.6329
NOLC1	A0A0A0MRM9;Q14978;Q14978-2;Q14978-3	0.362326	-2.36316	18.4129	13.897	13.9411	13.7521	8.8163	16.5931
EFL1	Q7Z2Z2;Q7Z2Z2-2	0.331876	-2.4281	9.01389	9.51981	8.84132	0.690901	9.99268	9.40712
PSMB6	P28072	0.592396	-2.44176	15.4578	13.5518	15.0392	13.791	8.75059	14.1819
HMGA1	P17096-2	0.899485	-2.53757	13.588	16.3259	13.1859	13.0772	10.153	12.2569
KRT77	Q7Z794	1.67977	-2.61966	15.3398	14.1959	15.2954	13.1606	12.6557	11.156
SRRT	A0A0A0MSP6;H7C3A1;Q9BXP5;Q9BXP5-2;Q9BXP5-3;Q9BXP5-4;Q9BXP5-5	1.52713	-2.68048	13.0307	12.1279	11.2444	8.34217	10.5047	9.51457
EIF2S3;EIF2S3B	P41091;Q2VIR3	1.46839	-2.69589	12.4696	14.4964	11.9875	10.6973	10.6119	9.55656
RPL37	D6RG19;P61927	2.12559	-3.17173	13.3689	12.3485	13.2183	10.5505	10.1341	8.73586
DDA1	Q9BW61	1.97636	-3.23592	16.6318	15.5034	14.3689	12.677	11.7101	12.4092
ZNF300;ZNF449;ZNF300;ZNF300;ZNF300;ZNF300	A0A0A0MS50;Q6P9G9;Q96RE9;Q96RE9-2;Q96RE9-3;Q96RE9-4	2.46043	-3.42345	11.9917	13.6186	12.8105	9.24519	9.94436	8.96089
NBDY	A0A0U1RRE5	2.68746	-3.46061	13.6481	12.0313	12.713	9.35412	9.54988	9.10655
ZRANB2	O95218;O95218-2	1.8548	-3.76776	14.2116	14.8853	12.5968	10.5421	10.8898	8.95854
CMTR1	Q5T7F5;Q8N1G2	0.585893	-3.90135	10.6445	9.49072	10.3271	9.54832	0.363424	8.84656
C11orf58;C11orf58;SMAP	E9PM92;E9PQA1;O00193	0.564695	-4.15401	11.0668	12.4909	12.0471	11.7827	1.31238	10.0477
ZNF502	C9JLT3;Q8TBZ5	1.05612	-6.13409	16.4094	18.2899	9.58265	7.41639	9.73534	8.72798

## Sheet: CSA DDA1KO +UV vs CSA +UV
Gene names	Protein IDs	-Log t-test p value	t-test Difference	CSAmClover +UV Intensity (Log2) experiment 1	CSAmClover +UV Intensity (Log2) experiment 2	CSAmClover +UV Intensity (Log2) experiment 3	CSAmClover DDA1KO +UV Intensity (Log2) experiment 1	CSAmClover DDA1KO +UV Intensity (Log2) experiment 2	CSAmClover DDA1KO +UV Intensity (Log2) experiment 3
PDHA1	Q5JPU3	1.08524	4.24406	9.4075	8.87535	14.5779	15.0469	15.7214	14.8247
BLMH	Q13867	1.01317	3.38963	13.9554	11.9607	13.4633	14.1527	16.2396	19.1561
ZNF502	C9JLT3;Q8TBZ5	0.353089	3.36494	10.4715	16.4551	9.79397	18.4924	19.3953	8.92769
PPP1R12A	F8VW28;F8VZN8;H0YHL8;O14974;O14974-2;O14974-3;O14974-4;O14974-5	3.20646	3.154	9.78778	10.7604	10.3361	13.6964	13.5	13.15
MRTO4	Q9UKD2	1.29215	2.88975	9.98385	9.17075	8.5048	12.2809	13.6751	10.3727
LAMB3	Q13751	2.92407	2.73372	10.5379	9.76616	9.45646	12.4897	12.7675	12.7045
SUPT6H	Q7KZ85	1.51543	2.47923	12.9788	11.7132	10.6316	14.3755	14.7617	13.6242
LRRC15	Q8TF66;Q8TF66-2	0.554495	2.47281	12.1968	8.21401	12.2595	15.9918	10.9732	13.1237
HNRNPL	A0A3B3ITJ4	0.681552	2.35451	14.5938	9.71818	13.6332	15.9882	14.4858	14.5347
LYAR	Q9NX58	0.648272	2.2643	7.02052	10.8054	11.6107	12.0751	10.8655	13.2889
H2AC1	Q96QV6	1.04642	2.01408	11.0553	10.0531	11.0986	12.9312	14.1006	11.2175
ERH	G3V279;P84090	0.946117	1.99504	14.7134	11.8445	14.0383	15.5092	16.3545	14.7176
APOBEC3C	Q9NRW3	4.47238	1.98192	14.0397	14.2411	14.1742	15.9803	16.2085	16.212
NOLC1	A0A0A0MRM9;Q14978;Q14978-2;Q14978-3	0.788861	1.97063	10.6139	10.2278	8.83626	13.318	12.3715	9.90024
POLR2A	A0A6Q8PGB0;P24928	3.81594	1.96561	13.5337	13.6703	13.6071	15.5416	15.3502	15.816
HMGB1	P09429;Q5T7C4	1.32973	1.90526	9.08099	7.91941	10.0054	11.3796	10.3728	10.9692
EIF3L	B0QY89;Q9Y262	0.802145	1.82929	13.6269	11.2556	13.7543	15.227	15.5219	13.3757
POLR2G	P62487	3.13157	1.80432	12.3622	12.8086	12.5238	14.4191	14.1002	14.5883
KRT6C	P48668	0.303417	1.80314	12.1759	9.4156	12.213	15.3587	15.2503	8.60494
SCRIB	A0A0G2JNZ2;A0A0G2JPP5;A0A669KB89;Q14160;Q14160-3	0.660984	1.73058	9.05552	11.2417	9.45902	13.2044	9.84573	11.8979
POLR2B	C9J2Y9;P30876	3.9065	1.71122	14.2132	14.4473	14.2902	16.0251	15.8674	16.1919
BCLAF1	A0A1W2PQ43;E9PJA7;E9PK09;E9PK91;E9PKI6;E9PQN2;H0YF00;Q9NYF8;Q9NYF8-2;Q9NYF8-3;Q9NYF8-4	0.619954	1.69949	13.6429	10.0315	13.0064	14.1633	14.7004	12.9155
CTSC	A0A7I2V2Q8;A0A7I2V466;A0A7I2V5C5;A0A7I2V6E3;A0A7I2YQT5;H0YCY8;P53634	1.07676	1.68799	10.9314	9.06276	11.1122	11.9272	11.5478	12.6952
KRT16	P08779	1.26427	1.68276	20.8559	20.318	22.0057	23.4709	22.5491	22.2078
LCE2B;LCE2A;LCE2C;LCE2D	O14633;Q5TA79;Q5TA81;Q5TA82	0.485013	1.66882	9.27707	5.14264	9.37988	9.24349	10.6651	8.89742
SMC3	Q9UQE7	0.186498	1.65161	11.178	1.25036	11.3034	10.243	10.0569	8.38671
POLR2L	P62875	2.71803	1.64647	13.8558	13.4723	13.9348	15.5896	15.5642	15.0485
KRT6A	P02538	1.35514	1.64276	20.2606	19.5015	20.8752	22.5945	21.7679	21.2033
USP19	E7ESU0;O94966;O94966-3;O94966-4;O94966-5;O94966-6;O94966-7	0.61508	1.64243	9.72802	12.6113	9.82534	10.9472	12.716	13.4287
CTR9	Q6PD62	3.59712	1.62323	12.9877	13.2578	12.8148	14.5949	14.6383	14.6968
POLR2C	P19387	3.12515	1.61451	14.0274	13.6339	13.597	15.5737	15.2206	15.3075
NCL	A0A7I2V428;C9JLB1;H7BY16;P19338	1.40168	1.61142	16.0143	15.5541	16.0923	17.634	18.304	16.557
SARS2;SARS2;SARS2;;SARS2;SARS2	M0QWZ7;M0QX29;M0R259;M0R2C6;Q9NP81;Q9NP81-2	1.71031	1.60757	9.69599	9.69718	9.42172	11.674	11.5806	10.383
TARS1	P26639;P26639-2	0.871464	1.603	12.0978	9.39412	11.6089	12.3878	12.4843	13.0377
BANF1	O75531	1.09662	1.59618	12.473	12.4946	12.7696	13.8979	15.4629	13.1649
SERBP1	Q8NC51;Q8NC51-2;Q8NC51-3;Q8NC51-4	1.45421	1.59266	12.9982	12.2263	12.8588	14.1651	15.1199	13.5763
CDC73	Q6P1J9	2.63639	1.58412	13.9299	14.3994	14.0234	15.5429	15.5031	16.0592
H4-16	P62805	2.00293	1.49942	18.7244	19.2628	19.1096	20.3189	21.092	20.1842
SUPT16H	Q9Y5B9	2.37496	1.49917	12.8455	13.3469	13.5173	14.5318	15.0446	14.6308
KRT17	Q04695	0.788334	1.48715	21.5548	19.7503	21.4215	23.3499	22.6808	21.1572
H2BC11;H2BC17;H2BC3;H2BC21	P06899;P23527;P33778;Q16778	1.89947	1.48311	15.4432	15.2544	15.8604	16.7589	17.5885	16.66
VPS37B	F5H1F6;F5H4M0;Q9H9H4	0.39786	1.48143	14.0541	9.56392	14.3642	14.621	14.1259	13.6797
PAF1	Q8N7H5;Q8N7H5-3	1.95577	1.46912	13.8352	13.5288	13.6774	15.3925	15.5344	14.5219
NIP7	J3QLW7;J3QRD6;J3QRR4;Q9Y221;Q9Y221-2	0.824054	1.4678	8.70902	10.4822	10.268	10.8456	12.4884	10.5286
IGHV3OR16-8;IGHV3OR16-17	A0A075B7F1;S4R3C0	0.826424	1.42189	18.698	19.1172	17.2268	19.0095	20.8483	19.4498
GTF3C5	Q5T7U1;Q9Y5Q8;Q9Y5Q8-2;Q9Y5Q8-3	0.458677	1.42095	11.7608	8.85013	11.3232	12.0799	13.7613	10.3557
RACK1	P63244	1.71201	1.41749	15.4036	15.4703	15.7634	17.0146	17.5563	16.3188
KRT6B	P04259	0.961408	1.41557	20.4241	19.0528	20.8502	22.376	21.0851	21.1127
EIF3M	E9PRY0;H0YCQ8;J3KNJ2;Q7L2H7;Q7L2H7-2	1.12822	1.41369	10.7775	11.6162	11.5678	12.067	13.765	12.3705
CDA	P32320	2.22679	1.40055	13.9853	14.8488	14.2681	15.7224	15.6853	15.8961
H2AC8;H2AW;H2AC6	P04908;Q7L7L0;Q93077	2.14227	1.38577	18.5564	18.7306	18.9282	20.1504	20.5473	19.6747
ARF4	C9JAK5;C9JPM4;P18085;U3KQF2	0.548347	1.37431	12.9502	11.4683	12.811	14.3201	15.1904	11.8419
POLR2I	K7EKS1;P36954	0.410083	1.36387	14.0452	11.3835	13.6368	15.6971	15.3554	12.1046
COPS5	Q92905	2.8353	1.36193	14.2597	14.2668	14.2026	15.4468	15.9516	15.4164
RPS29	P62273	1.53479	1.3516	13.5939	13.4194	13.9682	14.6417	15.7573	14.6373
MYOF	Q9NZM1-3	0.541224	1.35152	17.609	20.9423	20.0721	20.4307	21.8301	20.4171
ABCF2	C9JHK9;C9JZV3;Q9UG63;Q9UG63-2	0.757092	1.35132	8.4871	10.4037	11.0504	10.9949	11.8976	11.1026
MTDH	Q86UE4	0.449941	1.33555	8.93152	9.80177	9.9508	10.4206	13.2383	9.03191
COPS6	E7EM64;Q7L5N1	1.31457	1.33429	15.9363	14.7409	15.9118	17.0768	17.1783	16.3367
JMJD6	B2WTI3;B2WTI4;K7EJU9;Q6NYC1;Q6NYC1-2;Q6NYC1-3	0.393553	1.33128	13.2116	9.33733	11.8533	13.6288	13.7023	11.065
CTH	P32929	1.88566	1.30727	13.9076	14.6636	13.9531	15.4861	15.1603	15.7997
RPL9;RPL9P9	D6RAN4;P32969	2.06015	1.30499	12.3661	12.5405	12.8935	13.8744	14.3072	13.5334
CSTB	P04080	1.52809	1.30304	14.5212	14.339	14.0504	14.8744	15.8928	16.0526
PFKFB3;PFKFB3;PFKFB3;PFKFB1;PFKFB2;PFKFB2;PFKFB1;PFKFB1;PFKFB3;PFKFB3;PFKFB3;PFKFB3;PFKFB4;PFKFB4;PFKFB4;PFKFB1;PFKFB3;PFKFB3;PFKFB4	A0A1W2PR17;F2Z2I2;H0Y483;I1Z9G3;O60825;O60825-2;P16118;P16118-2;Q16875;Q16875-2;Q16875-3;Q16875-4;Q16877;Q16877-2;Q16877-3;Q4VBA9;Q5VX20;Q5W015;Q66S35	0.39459	1.30193	12.5873	11.1502	10.192	13.3768	14.2128	10.2457
SCAF8;SCAF4;SCAF4;SCAF4;SCAF8;SCAF8	A0A0A0MT33;O95104;O95104-2;O95104-3;Q9UPN6;Q9UPN6-2	1.19371	1.30036	13.1547	11.4041	12.1251	13.5693	13.6138	13.4018
EIF3K	K7ERF1;K7ES31;Q9UBQ5;Q9UBQ5-2	1.80697	1.29944	12.4956	13.278	13.0805	14.0704	13.9941	14.6879
ERAL1	K7EQJ8;O75616	0.609413	1.28903	9.06544	10.4498	10.2612	12.2483	9.5422	11.853
MACROH2A1	O75367;O75367-2;O75367-3	1.74519	1.28401	13.9635	14.7502	14.4599	15.4396	16.1539	15.4321
KIAA0930	B0QY18;B0QY20;H7C1U5;Q6ICG6;Q6ICG6-2;Q6ICG6-3;V9GYW7;V9GZ62	2.85722	1.27303	11.4173	11.7617	11.4307	12.6834	13.0398	12.7056
KRT15	P19012	1.65654	1.27285	8.34136	8.54659	8.54404	10.3501	9.16045	9.74
EIF3F	H0YDT6;O00303	0.983586	1.27003	16.3682	16.2376	16.6625	18.042	18.4981	16.5383
FABP5	Q01469	1.47758	1.26353	15.6996	15.6348	16.3842	17.7684	17.0441	16.6967
TSPYL1	Q9H0U9	0.650336	1.25704	7.34175	9.1287	9.37299	9.99968	8.78327	10.8316
THOC2	F2Z2V2;Q8NI27	0.488382	1.23793	13.4972	13.4237	10.1857	13.5208	13.9196	13.3799
EIF3CL;EIF3C;EIF3C	B5ME19;Q99613;Q99613-2	1.38249	1.23758	13.9421	13.7893	13.7645	15.1739	15.7288	14.306
PFDN6	A2AB88;O15212	0.422379	1.23116	11.247	15.3996	13.241	14.1057	14.3006	15.1748
MRPL41	Q8IXM3	1.2279	1.22734	10.5249	11.3249	12.0006	12.6252	12.1282	12.779
PROSER2	D3DRR9;Q86WR7;Q86WR7-2	0.922958	1.20757	12.1802	12.4537	10.5397	12.8274	13.1871	12.7817
TSR1	Q2NL82	1.0317	1.20207	13.1184	11.9671	13.3133	13.6587	14.7028	13.6435
PBDC1	Q9BVG4	0.73889	1.2003	14.4545	12.0318	13.6287	14.5059	14.9856	14.2245
DUSP4	Q13115	0.703404	1.17193	11.2306	9.25944	10.5178	11.768	10.5494	12.2062
RPL5	A0A2R8Y6J3;P46777	1.7082	1.17107	16.424	16.2649	16.8523	17.5807	18.1714	17.3023
RPS7	P62081	1.89257	1.16765	16.1035	16.2542	16.3357	16.9413	17.8556	17.3994
POLR2H	C9JLU1;P52434;P52434-4	1.57017	1.16266	13.5703	12.8981	12.7999	14.4365	14.5425	13.7772
FAU	E9PR30;P62861	1.29732	1.16187	15.2446	16.1871	16.0267	16.4495	17.4965	16.998
TRIB1	Q96RU8	2.33912	1.16167	17.1039	17.2145	17.1107	18.1952	18.0274	18.6915
RPS15A	P62244	1.68852	1.15715	17.0734	16.7881	17.113	17.8722	18.736	17.8378
ALKBH5	Q6P6C2;Q6P6C2-1	0.460863	1.15646	12.3684	10.1501	8.94948	12.2118	11.8868	10.8388
ERCC6	Q03468	3.64761	1.14159	15.0245	14.9606	15.2335	16.1419	16.2622	16.2392
H2BC12;H2BS1;H2BC5;H2BC10;H2BC18;H2BC18;H2BC9;H2BC15;H2BC14;H2BC13;H2BC15	O60814;P57053;P58876;P62807;Q5QNW6;Q5QNW6-2;Q93079;Q99877;Q99879;Q99880;U3KQK0	3.18723	1.13347	18.6076	18.8253	18.6154	19.6603	19.984	19.8044
RPS10-NUDT3;RPS10-NUDT3;RPS10;RPS10;RPS10;RPS10	A0A1W2PQS6;A0A2R8Y6L3;A0A2R8Y7H1;A0A2R8YFH6;F6U211;P46783	0.879256	1.12866	15.4191	14.6892	15.3993	16.26	17.2645	15.3691
RPS27	P42677	1.46787	1.1176	14.0032	14.5506	14.9664	15.6131	16.0052	15.2548
DHX32	Q7L7V1;Q7L7V1-2	0.382437	1.11696	7.7384	9.53003	11.3249	10.8262	11.6927	9.42526
SERPINB8	P50452	0.689088	1.11315	10.1643	10.677	11.4418	12.5159	12.5019	10.6048
RPL17;RPL17-C18orf32;RPL17-C18orf32;RPL17;RPL17;RPL17;RPL17;RPL17;RPL17	A0A087WXM6;A0A0A0MRF8;A0A0A6YYL6;J3KRX5;J3QLC8;J3QQT2;P18621;P18621-2;P18621-3	1.53678	1.08595	13.3215	13.9294	13.6829	14.4012	15.2745	14.516
RBMX	P38159	1.0235	1.06272	16.0105	15.2494	15.7709	16.7557	17.4808	15.9825
UVSSA	A0A7I2V3L2;A0A7I2V4K1;A0A7I2V554;Q2YD98	3.73629	1.06217	11.7003	11.5959	11.4311	12.6415	12.6614	12.611
S100A7	P31151	0.453746	1.05872	15.2984	14.7249	12.3469	16.0285	14.5433	14.9746
RPL23A	A8MUS3;H7BY10;K7EMA7;K7ERT8;P62750	1.67401	1.05616	13.7725	14.0583	14.5093	15.0747	15.5366	14.8972
MAIP1	H7C0V0;Q8WWC4	0.363296	1.05128	8.05326	8.99625	9.42258	10.3035	11.5972	7.72516
DSC2	A0A3B3ISU0;Q02487	0.324291	1.05121	9.94057	8.52022	10.1212	12.5364	10.8932	8.30609
C11orf98;;C11orf98	A0A494BXY3;E9PLD3;E9PRG8	1.17805	1.04996	12.2007	12.7523	12.7491	13.2112	14.3701	13.2706
LEO1	Q8WVC0	0.602207	1.04939	12.9863	13.9658	13.5499	14.9582	13.1375	15.5545
RPS19	P39019	0.753959	1.04763	15.7384	14.3949	15.2632	16.3115	16.9777	15.2502
RPL11	P62913	1.70704	1.03302	15.6243	16.1374	16.1654	16.6124	17.3287	17.085
COPS4	Q9BT78	3.50058	1.02691	15.716	15.5434	15.6621	16.8071	16.5646	16.6305
RAB1A;RAB1A;RAB1B	E7END7;P62820;Q9H0U4	0.364958	1.02548	13.1936	9.29166	11.9239	12.4205	12.9412	12.1238
GPS1	C9JFE4;Q13098;Q13098-5;Q13098-7	2.46521	1.01876	15.9768	16.4001	15.9778	16.9955	17.1291	17.2864
OCIAD2	Q56VL3	0.35441	1.01771	12.5756	12.6164	9.11568	11.8914	12.8021	12.6672
RPL19	A0A7I2YQG2;J3KTE4;J3QR09;P84098	1.46091	1.01456	16.0448	16.6467	16.4682	16.9611	17.8875	17.3548
KRT71	Q3SY84	0.295677	1.01387	19.6146	17.153	19.0193	20.4733	21.0719	17.2834
GAR1	Q9NY12;Q9NY12-2	0.459069	1.01097	13.078	11.1383	10.9683	12.4136	14.0234	11.7805
ATOX1	O00244	1.70675	1.00531	15.2304	14.6075	14.4128	15.9126	15.5643	15.7896
LARP4	A0A087WTL9;F8VY40;F8W1I4;Q71RC2;Q71RC2-3;Q71RC2-4;Q71RC2-5;Q71RC2-6;Q71RC2-7;Q8TBL5;Q96J85	1.31276	1.00283	13.3369	12.9409	13.382	14.4547	14.6405	13.5732
SSRP1	Q08945	1.54647	0.994794	14.1824	13.9943	14.4888	15.104	15.7109	14.8349
RPL13	P26373	1.65448	0.985481	15.8629	16.7508	16.346	17.1624	17.4674	17.2863
CUL4A	Q13619	1.54707	0.980194	14.3115	13.8367	14.3335	15.4063	15.3602	14.6558
RPL7A	P62424	1.7458	0.97682	16.2856	16.7583	16.5976	17.2718	17.9423	17.3578
;RPL26;RPL26;RPL26;RPL26	J3QQQ9;J3QQV1;J3QRC4;J3QRI7;P61254	1.52289	0.975631	15.7702	16.2561	16.2213	16.6665	17.5262	16.9819
CAMK2D	D6R938;E9PBG7;E9PF82;Q13557;Q13557-10;Q13557-11;Q13557-12;Q13557-3;Q13557-4;Q13557-5;Q13557-6;Q13557-8;Q13557-9	0.837765	0.963275	9.8787	9.71505	8.24976	10.4309	10.3037	9.99879
EIF3E	A0A7I2V2H9;A0A7I2V2W0;A0A7I2V3I0;A0A7I2V3I2;A0A7I2V3S3;A0A7I2V4B4;B3KW56;P60228	0.609014	0.962741	13.0982	11.4629	13.061	14.074	13.8444	12.5919
SERPINB5	C9JLM5;P36952;P36952-2	0.395634	0.959439	10.5695	8.59063	11.1374	11.9674	11.4664	9.74212
RPL32	D3YTB1;F8W727;P62910	1.39401	0.956233	15.2104	15.5837	15.5505	15.996	16.9817	16.2356
RPL36	Q9Y3U8	1.37489	0.953562	14.5303	14.7997	14.7605	15.3042	16.2745	15.3725
SRSF9	Q13242	1.91276	0.950965	13.0889	13.4843	13.213	13.8426	14.4039	14.3926
RPSA	A0A0C4DG17;C9J9K3;P08865	1.55462	0.950883	17.4929	17.3408	17.8437	18.5272	18.9153	18.0876
RPL35	F2Z388;P42766	0.995612	0.947162	14.4152	15.4429	15.5729	15.7614	16.5926	15.9184
RPL4	P36578	1.54218	0.944201	16.078	16.4289	16.3947	16.9903	17.7632	16.9808
RPL36AL	Q969Q0	1.63871	0.943924	14.2177	14.0972	14.0986	14.8435	15.601	14.8007
NEU2	Q9Y3R4	0.681472	0.942131	10.7771	11.6503	10.5219	12.6739	12.1945	10.9072
RPL15	P61313	1.53066	0.938747	16.4047	17.0294	16.8197	17.4048	18.1123	17.5529
COPS7B	Q9H9Q2	1.98629	0.934262	14.626	15.2495	14.7464	15.7248	15.7442	15.9557
RPS4X	P62701	1.25101	0.927149	17.1205	16.9823	17.2918	17.8872	18.7075	17.5813
KRT14	P02533	0.959797	0.926363	18.9451	18.6113	19.3623	20.6144	19.8373	19.246
ASB3	Q9Y575;Q9Y575-2;Q9Y575-3	0.714556	0.924321	12.9376	14.86	13.7718	14.5062	14.6679	15.1682
RPL18	J3QQ67;Q07020	1.39025	0.920481	16.6548	17.2449	16.9511	17.4307	18.3228	17.8589
RPS24	A0A2R8Y849;A0A2R8YD14;E7ETK0;P62847;P62847-2;P62847-3;P62847-4	2.07635	0.919026	15.3475	15.6316	15.7367	16.2622	16.7735	16.4372
RPL8	P62917	1.50259	0.916574	15.7101	16.3994	15.9003	16.5524	17.2079	16.9993
COPS2	P61201;P61201-2	3.63035	0.909266	15.2905	15.3436	15.4877	16.36	16.2133	16.2763
RPL22;;RPL22;RPL22;RPL22;RPL22;RPL22	K7EJT5;K7EKS7;K7ELC4;K7EMH1;K7EP65;K7ERI7;P35268	0.916776	0.906187	14.8864	15.0163	15.2752	15.7855	16.8143	15.2967
PGK1	P00558;P00558-2	0.325107	0.906176	10.9586	9.06764	9.96817	11.5487	12.2338	8.93047
COPS3	Q9UNS2	1.37157	0.904512	16.1794	17.0452	16.5017	17.4258	17.2057	17.8083
DDX21	Q9NR30;Q9NR30-2	1.56654	0.901865	14.406	14.7276	14.7552	15.3195	16.0102	15.2647
TSEN54	A0A7P0TA59;A0A7P0Z413;E7EN92;J9JIH8;Q7Z6J9	0.313562	0.901463	12.8453	9.25518	12.7008	12.5647	12.5671	12.3738
GMNN	E2QRF9;O75496	1.29726	0.895638	8.87634	8.66655	7.83572	9.26078	9.33494	9.4698
COA4	Q9NYJ1	1.71568	0.894148	13.7124	13.5135	12.9594	14.4185	14.2697	14.1794
LRRC42	A6NL66;E7EP35;Q9Y546	0.531378	0.892028	12.3835	10.6382	12.7805	12.5073	12.4702	13.5008
COPS7A	Q9UBW8	2.72788	0.890749	13.9151	14.2156	14.1888	15.0657	14.8469	15.079
CREG1	A0A3B3IRL2;O75629	0.21891	0.881696	8.51481	11.6638	9.25392	11.6095	12.244	8.22411
RMND5A	Q9H871	1.19782	0.880041	10.0681	9.3878	9.20021	10.2089	10.2091	10.8781
LARP1	A0A0B4J210;Q6PKG0	0.970622	0.878757	11.9077	12.8278	12.7863	13.0331	13.1428	13.9823
SNRNP27	B8ZZ98;Q8WVK2	0.231628	0.876921	13.3941	10.0852	10.6564	12.7837	13.8025	10.1804
RPL18A	M0R117;M0R1A7;M0R3D6;Q02543	1.01837	0.876293	15.9526	16.669	16.3711	16.6211	17.82	17.1805
GSN	A0A0A0MS51;A0A0A0MT01;A0A0U1RQL8;P06396;P06396-2;P06396-3;P06396-4;Q5T0I0	0.225336	0.873153	11.0254	6.29197	9.86832	10.6073	10.2736	8.92416
MAGEB2	O15479	0.569744	0.87298	14.3687	12.9317	13.6574	14.299	15.5542	13.7235
BAG3	C9JFK9;O95817	0.383061	0.868708	12.5741	12.1241	9.51699	12.3187	12.1914	12.3112
CCND1	P24385	1.51275	0.867834	11.3421	10.9579	10.939	12.0478	11.5079	12.2868
EIF3A	Q14152	1.17326	0.864296	14.9339	14.914	15.0395	15.8717	16.3991	15.2094
KRTAP3-2	Q9BYR7	0.158157	0.860817	11.9681	5.9712	11.4526	11.9433	10.4666	9.56451
RPS8	P62241	1.05039	0.860329	17.0111	17.0494	17.0228	17.8262	18.5831	17.2549
RPL10A	P62906	1.70908	0.849976	15.4825	15.5177	15.7057	16.2062	16.8472	16.2024
CUL4B	A0A669KAX4;Q13620-1	1.95542	0.84817	15.4377	16.0567	15.6012	16.5761	16.5992	16.4648
RPS25	P62851	0.914409	0.847717	16.9818	18.3612	17.8408	18.2853	18.8379	18.6037
RRM2B	Q7LG56	1.24288	0.845029	13.7639	12.8976	12.7834	14.1481	13.9343	13.8977
RPL31	B7Z4C8;B7Z4E3;C9JU56;H7C2W9;P62899;P62899-2;P62899-3	1.16005	0.843539	16.6564	17.1913	17.0802	17.6689	18.3988	17.3907
hCG_2039566;;H2AC17;H2AC7;H2AC12;H2AC14;H2AJ	A0A0U1RR32;A0A0U1RRH7;P0C0S8;P20671;Q96KK5;Q99878;Q9BTM1	0.279938	0.841166	14.9478	12.323	15.0713	16.4734	14.6925	13.6997
PSMD14	O00487	0.232614	0.828241	12.1309	8.19913	11.5955	11.5268	10.297	12.5865
TRA2B	P62995	0.753624	0.824804	16.4313	15.3363	16.3475	17.123	17.3136	16.1529
RPS23	P62266	1.43796	0.8246	16.0141	16.6713	16.6151	16.943	17.4937	17.3376
SKP1	E5RJR5;P63208	0.327927	0.821122	15.4421	12.5613	14.9059	15.4502	15.8306	14.0919
POF1B	Q8WVV4;Q8WVV4-1	1.33794	0.820917	13.4761	13.1455	13.4194	14.1868	13.6941	14.6228
SERPINB12	Q96P63;Q96P63-2	0.693144	0.818699	14.5533	13.9533	14.3028	15.5214	15.6701	14.074
HEXIM1	O94992	0.205563	0.815988	14.0042	9.28236	13.6363	13.2756	13.4264	12.6689
RPL10	P27635;X1WI28	1.6005	0.806459	17.1457	17.5257	17.1456	17.8034	18.4511	17.9819
CPA4	B7Z5J4;Q9UI42;Q9UI42-2	0.35167	0.805087	11.1011	9.80668	9.56417	10.9457	12.3959	9.54559
FASTKD2	Q9NYY8;Q9NYY8-2	0.0938561	0.802582	10.0599	0.936759	9.14251	9.03872	7.75103	5.75712
RPLP2	P05387	0.312251	0.79303	16.8753	15.3835	16.5021	17.7118	18.229	15.1993
SF3A3	Q12874	0.173934	0.788814	13.0942	8.8734	12.0508	12.1897	14.1024	10.0927
RPL21	P46778	1.48255	0.785032	14.4818	15.073	14.9039	15.2985	15.8904	15.625
RPS6	P62753	1.35302	0.783085	16.5033	17.1809	16.9258	17.2934	17.9066	17.7593
DKC1	O60832;O60832-2	0.942642	0.782309	11.9984	11.7171	12.1567	12.9154	13.2678	12.0359
COPS8	E9PGT6;Q99627	0.9467	0.781511	15.8055	16.9273	16.2881	17.0426	16.8063	17.5166
RPL29	A0A3B3ITT5;P47914	1.16523	0.780696	15.4814	16.2362	16.0507	16.2691	16.8816	16.9597
RPL35A	P18077	1.69106	0.77763	16.0559	16.1106	16.5788	16.8694	17.2766	16.9321
PRKAA2;PRKAA2;PRKAA1;PRKAA1;PRKAA1	A0A087WXX9;P54646;Q13131;Q13131-2;Q96E92	0.39095	0.77732	9.96514	8.46268	9.58019	8.79924	10.3163	11.2244
RPS3A	P61247	1.91368	0.774433	17.6974	17.675	17.9891	18.4897	18.8439	18.3512
CSNK2A2	P19784	0.370248	0.774392	12.6998	12.3844	11.0715	14.2293	12.4023	11.8473
RPL14	E7EPB3;P50914	1.46155	0.772619	17.3177	17.8724	17.5977	18.055	18.6984	18.3522
RPL6	Q02878	1.2556	0.767792	17.2192	18.0798	17.8039	18.2006	18.6116	18.5942
RPS9	P46781	1.51337	0.767196	17.2421	17.7154	17.5714	18.0247	18.6441	18.1617
RPS3	P23396	1.80697	0.759802	17.2455	17.4226	17.4689	17.9975	18.4873	17.9316
NAT10	Q9H0A0;Q9H0A0-2	1.26187	0.75537	10.7383	11.4056	11.0593	11.5766	12.2288	11.664
TXN	P10599	0.265119	0.754927	18.7657	15.5936	17.8786	18.7623	18.8377	16.9027
ARL1	P40616;P40616-2	0.332323	0.748661	13.2944	10.3788	12.9031	12.8998	13.2447	12.6778
SNX1	H0YK42;Q13596;Q13596-2;Q13596-3	0.450196	0.747897	12.8341	12.7682	11.0173	12.7305	13.7257	12.4071
RPL12	P30050	1.42469	0.747852	17.3839	17.5637	17.4627	18.005	18.6944	17.9544
RPL27	P61353	1.86563	0.74453	16.9128	17.2077	17.15	17.583	18.109	17.8121
KRT5	P13647	0.752201	0.74438	20.9098	20.1934	21.0307	22.0499	21.5465	20.7706
SH3RF1	Q7Z6J0;Q7Z6J0-3	0.442181	0.743925	10.7985	9.98149	10.0481	9.70896	11.41	11.9409
PNP	P00491	0.296584	0.742529	11.477	9.63526	11.3581	11.9409	12.7661	9.99097
AARS1	A0A6Q8PF33;A0A6Q8PFY2;A0A6Q8PGB5;A0A6Q8PGE8;A0A6Q8PGN5;A0A6Q8PGR9;H3BPK7;P49588;P49588-2	0.348957	0.739762	9.40259	10.0509	7.88179	10.5762	8.65948	10.3189
POLR2E	A0A087WVN5;A0A087WVZ9;A0A087WWX0;A0A0A0MQR7;P19388	1.97507	0.738296	14.7771	14.5518	14.5275	15.2504	15.1818	15.6391
NMT1;NMT2;NMT1;NMT1;NMT2	A0A7I2V539;O60551;P30419;P30419-2;Q5VUC6	0.449555	0.735931	11.4372	9.96864	9.77798	11.5331	11.6662	10.1922
SPRR1B	P22528	0.845377	0.732151	16.4473	16.4496	16.7591	17.5264	17.8026	16.5236
GTPBP4	Q9BZE4;Q9BZE4-2	0.14063	0.730695	14.1656	8.90824	14.483	14.0929	13.7036	11.9525
RPL3	P39023	1.21727	0.729745	16.22	16.9832	16.5484	17.0077	17.6124	17.3206
RPS18	P62269	1.62867	0.729609	17.1479	17.7079	17.5089	17.9992	18.4166	18.1377
RPLP0	P05388	1.32331	0.727742	17.1518	17.1764	17.3066	17.8755	18.4058	17.5367
RPS15	A0A0B4J2B4;K7EJ78;K7ELC2;K7EM56;K7EQJ5;P62841;S4R417;S4R456	1.21667	0.725504	13.8805	13.7636	13.8009	14.2745	15.0965	14.2506
CALCOCO1	Q9P1Z2;Q9P1Z2-2;Q9P1Z2-3;Q9P1Z2-4	0.601693	0.722216	10.027	9.81824	9.28883	10.7466	11.0823	9.47179
RPL7	P18124	0.955417	0.718747	16.5239	17.5306	17.2038	17.4495	18.0989	17.8661
BRIX1	Q8TDN6	0.465563	0.716208	11.9032	13.4036	13.0333	13.4123	14.382	12.6945
RPL27A	E9PLL6;P46776	0.732264	0.714831	17.0742	18.0731	17.4574	17.5951	18.7345	18.4195
MRPL36	Q9P0J6	0.586531	0.709411	13.3928	14.9452	14.2605	14.7183	14.5126	15.4959
RPL24	C9JNW5;C9JXB8;P83731	1.24939	0.707664	15.7898	16.3705	16.2096	16.5237	17.2114	16.7578
YBX1	H0Y449;P67809	0.694785	0.699931	13.6871	13.362	13.4308	13.7884	15.0882	13.703
NGDN	Q8NEJ9;Q8NEJ9-2	0.830783	0.699869	11.6739	12.8225	12.1433	12.6848	13.319	12.7354
L2HGDH	C9JVN9;Q9H9P8;Q9H9P8-2	0.328627	0.698158	11.4689	9.49441	10.6975	11.4263	12.2956	10.0334
KRT80	Q6KB66;Q6KB66-2	0.702865	0.696799	15.0401	14.6853	14.9216	16.1599	15.8613	14.7161
R3HDM1	A0A804HIA8;H7C1X4;H7C207;Q15032;Q15032-2;Q15032-3;Q15032-4	0.234138	0.694966	10.4868	8.88245	9.62219	10.3622	12.2102	8.50396
PXN	A0A1B0GTU4;F5GZ78;P49023;P49023-2;P49023-3;P49023-4	2.06553	0.685172	12.7803	12.6234	12.7355	13.2206	13.6624	13.3117
RPS26	P62854	1.11711	0.682706	16.7227	17.345	17.1546	17.3292	18.0653	17.8759
DUSP5	Q16690	0.591054	0.682495	9.87976	10.4997	9.78703	10.0567	10.5308	11.6265
RAB40C	H3BME4;H3BNV8;H3BPA5;H3BTC6;Q96S21;Q96S21-2	1.59502	0.666862	12.6002	12.238	12.5782	13.2443	13.3328	12.8398
PABPC1	A0A087WTT1;A0A7I2V649;A0A7I2YQ90;E7ERJ7;H0YAR2;P11940;P11940-2	0.792873	0.656689	14.3599	13.954	14.5646	14.9714	15.5233	14.3539
KRT13	K7EMD9	0.403626	0.655901	15.9941	14.4844	15.2504	16.8108	15.9216	14.9643
TBC1D24	A0A2R8Y518;H3BV07;Q9ULP9;Q9ULP9-2	0.455464	0.653788	12.7394	10.9835	12.8167	12.6721	12.6809	13.1479
NCCRP1	Q6ZVX7	1.87027	0.650414	14.5645	14.6585	14.6501	15.3421	15.4964	14.9858
RPS14	A0A2R8Y811;P62263	1.11489	0.645376	16.1207	16.9712	16.6487	17.0223	17.2436	17.4108
RPL13A	P40429	0.855315	0.639437	16.9104	17.6072	17.4423	17.4234	18.3458	18.109
PRDX5	P30044;P30044-2;P30044-3;P30044-4	0.127449	0.634842	13.9081	10.363	11.0433	12.8752	14.6826	9.66113
S100A8	P05109	0.157175	0.634629	16.0925	13.7495	11.9807	16.1542	14.6464	12.926
EIF4G1	A0A7I2Y1C3;E7EUU4;E7EX73;E9PGM1;Q04637;Q04637-3;Q04637-4;Q04637-5;Q04637-6;Q04637-7;Q04637-8;Q04637-9	0.861952	0.631841	13.3625	12.4076	13.0561	13.1952	13.8211	13.7053
RPS11	P62280	0.99502	0.625976	15.9965	16.714	16.3388	16.6239	17.3504	16.953
PSMF1	Q5QPM7;Q5QPM9;Q92530	0.285116	0.619829	12.6876	10.6849	12.2787	13.4715	12.7155	11.3236
RPS13	P62277	1.35323	0.616671	16.8509	17.3917	17.3836	17.6522	18.0446	17.7795
ASF1B	K7ELW9;Q9NVP2	0.205084	0.616528	9.59228	9.00046	12.4111	11.3688	11.513	9.97164
RPP40	A0A087X1N3;F8WC38;O75818;O75818-2	0.527265	0.615403	13.0961	11.7507	13.3538	13.5927	13.303	13.1511
FBXO30	Q8TB52	0.518383	0.610668	9.99062	9.91265	10.8297	10.2225	10.6774	11.6651
H3-3B;H3C12;H3-3B;H3-4;H3C13	K7EK07;P68431;P84243;Q16695;Q71DI3	0.464635	0.609107	17.3667	18.8857	18.0551	18.6409	18.1292	19.3647
U2AF2	P26368;P26368-2	2.30191	0.606325	16.3422	15.998	16.2967	16.8046	16.8325	16.8188
AGTPBP1	J3KNS1;Q9UPW5	2.83622	0.604475	14.1743	14.3108	14.2154	14.7271	14.831	14.9559
HAS1	G3V1S7;M0QXH4;M0R2V0;Q92839	1.50664	0.600715	18.766	18.3134	18.8203	19.4071	19.1926	19.1021
ITGB4	P16144;P16144-2;P16144-3;P16144-4	1.47019	0.599394	12.7084	12.7543	12.9942	13.1482	13.3831	13.7237
UBE2L3	P68036;P68036-3	0.272036	0.598149	15.9076	13.8549	15.1134	16.2002	16.2087	14.2616
EIF3B	P55884;P55884-2	0.987502	0.59603	15.4086	15.202	15.4709	16.0394	16.3791	15.4511
RPL23	P62829	1.4018	0.595933	16.5463	16.8751	16.2223	17.0324	17.2435	17.1557
ERCC8	Q13216	0.681599	0.594915	18.9499	19.6941	18.9892	19.205	20.2677	19.9453
DDX18	Q9NVP1	0.35944	0.593959	10.1593	9.63743	11.2626	11.2385	11.6203	9.98243
RTRAF	Q9Y224	0.174655	0.586982	11.1094	9.56639	9.93043	11.5927	12.3193	8.45521
RPS2	P15880	1.48328	0.582372	16.8616	16.9344	17.0229	17.3253	17.8728	17.3679
SRSF4	A0A0D9SEM4;Q08170	0.520398	0.581544	11.3458	12.7488	11.2555	12.2582	12.5335	12.3031
AZGP1	P25311	0.319507	0.581155	14.7188	13.526	13.0083	14.7835	14.9696	13.2435
DYNLL1	P63167	0.420861	0.580017	16.6837	15.1664	15.6265	16.3303	17.096	15.7903
RPLP1	P05386	0.963697	0.577271	18.4765	19.4285	18.9544	19.6277	19.5309	19.4326
NPM1	A0A7I2YQC0;P06748;P06748-2	0.583093	0.574966	15.9572	14.6086	15.6555	16.2044	16.0764	15.6654
SERPINB3	P29508	0.567768	0.574334	12.17	12.3906	11.7599	12.6204	13.4195	12.0037
THRAP3	A0A3B3ITZ9;Q9Y2W1	0.863131	0.572243	12.7212	13.5348	12.8083	13.7563	13.2558	13.769
KRT9	P35527	0.657217	0.571412	23.3495	23.0459	23.3372	24.2524	24.1376	23.0568
HDAC6	Q9UBN7	1.14333	0.57066	19.6945	20.1841	19.8384	20.3053	20.2789	20.8448
RPS5	M0R0F0;P46782	1.67258	0.568063	15.7379	16.1443	15.9733	16.3574	16.7019	16.5005
SNRPA1	P09661	1.33997	0.566602	21.4019	21.4898	21.7441	21.7852	22.3508	22.1996
RPL36A;RPL36A-HNRNPH2;RPL36A;RPL36A	H0Y5B4;H7BZ11;J3KQN4;P83881	0.803094	0.565701	15.3396	15.8361	15.1435	15.6815	16.502	15.8327
HEATR1	Q5T3Q7;Q9H583	0.883479	0.564312	10.7295	10.2924	10.7265	10.7455	11.6333	11.0625
ELOC	E5RHG8;Q15369	1.05399	0.564043	14.2289	13.6343	14.3461	14.8259	14.6656	14.4099
EXOSC9	D6RIY6;Q06265;Q06265-2;Q06265-3;Q06265-4	1.68287	0.563167	13.572	13.1633	13.5339	13.8662	14.1332	13.9594
ATP5PO	P48047	0.412727	0.557934	17.0753	16.5277	16.2833	18.2271	16.787	16.546
CCS	J3KNF4;O14618	0.756542	0.557645	14.5948	13.9799	14.0863	14.709	15.295	14.3299
KRT78	Q8N1N4	0.479374	0.556835	19.4105	18.9603	19.4865	20.4399	20.1883	18.8998
SBSN	Q6UWP8	0.345429	0.555831	12.3485	11.6788	12.3868	12.7584	13.7443	11.5789
RPL28	H0YKD8;H0YMF4;P46779;P46779-2;P46779-3;P46779-4;P46779-5	2.3955	0.550998	17.1779	17.3316	17.2703	17.6593	17.9374	17.836
GLRX5	Q86SX6	0.153201	0.549214	14.4466	10.6358	14.3705	14.3878	13.8854	12.8273
RPL38	J3KT73;J3QL01;P63173	0.743041	0.547427	15.0252	14.8202	14.8084	15.179	16.0877	15.0294
PFN2	P35080	1.72607	0.546808	18.4617	18.0731	18.2125	18.6223	18.8705	18.8949
MTOR	P42345	1.03556	0.544866	10.5805	10.6219	10.5828	11.631	10.852	10.9369
ALDOA	H3BMQ8;H3BPS8;H3BQN4;H3BR04;H3BUH7;J3KPS3;P04075;P04075-2	0.349951	0.542638	14.2413	15.0307	14.3852	14.5296	16.287	14.4685
LYSMD2	Q8IV50	0.286374	0.541691	14.6342	12.2339	13.9529	14.1092	14.6346	13.7023
RPS16	P62249	0.972357	0.540605	16.6224	17.4051	17.2575	17.5302	17.5391	17.8376
AHSA1	G3V438;H0YJ63;H0YJG7;O95433;O95433-2	1.4347	0.540298	11.9207	11.5328	11.5337	11.9685	12.2909	12.3487
PFDN5	H3BPF6;Q99471	0.30904	0.539187	11.7473	11.4489	10.9691	12.3467	12.8287	10.6073
RPL39;RPL39P5	P62891;Q59GN2	0.410491	0.533448	15.1822	16.7695	16.2954	16.047	16.8123	16.9881
RPL22L1	C9JYQ9;H0Y8C2;Q6P5R6	0.786496	0.53174	14.6972	14.4371	14.3133	14.8772	15.5722	14.5934
EPS8L2	A0A3B3ISQ4;Q9H6S3	0.710837	0.531116	14.718	15.5995	14.779	15.4716	15.2918	15.9266
RBX1	P62877	1.59454	0.529665	15.117	15.6435	15.3614	15.9207	15.892	15.8981
TRMT10C	C9JVB6;Q7L0Y3	0.191838	0.528573	12.6279	9.6364	11.2857	12.415	12.2138	10.5069
NAP1L1	B7Z9C2;F5H4R6;F8VUX1;F8VV59;F8VXI6;F8VY35;F8W020;F8W0J6;F8W118;F8W543;H0YH88;H0YHC3;H0YIV4;P55209;P55209-2;P55209-3	0.206204	0.527477	11.444	10.4301	9.81544	12.075	11.8356	9.36129
AP3B2;AP3B2;AP3B2;AP3B2;AP3B2;AP3B2;AP3B2;AP3B2;AP3B2;AP3B1;AP3B1;AP3B2;AP3B2;AP3B2	A0A2R8Y2A8;A0A590UJ60;A0A590UJU0;A0A590UJW5;A0A590UK04;A0A590UKC4;A0A590UKD3;A0A5F9UJV3;F5GWU4;O00203;O00203-3;Q13367;Q13367-3;Q13367-4	0.177027	0.523801	10.7081	10.0502	8.79977	10.4559	12.0221	8.65145
HSPA2	P54652	0.20859	0.52246	12.0723	11.0602	11.6551	12.4005	13.559	10.3954
TUBB8	Q3ZCM7	0.213153	0.520693	12.7367	10.4599	12.875	13.1047	13.0536	11.4753
FBLL1;FBL;FBL;FBL;FBL;FBL	A6NHQ2;M0QXL5;M0R0P1;M0R299;M0R2Q4;P22087	0.575961	0.519361	12.9833	13.5337	13.311	13.1271	14.3979	13.8611
GGH	Q92820	0.724876	0.513928	11.5664	11.3055	11.3948	12.4843	11.9322	11.3919
;RPS17	H3BNC9;P08708	0.528603	0.513865	14.4497	15.8647	15.28	15.4705	15.83	15.8356
DHX30	H7BXY3;Q7L2E3;Q7L2E3-2;Q7L2E3-3	0.718935	0.513021	11.2981	11.3296	11.5853	11.6077	12.5441	11.6003
SERPINB1	P30740	3.19019	0.512872	14.546	14.4446	14.5558	15.1069	14.9817	14.9965
LDHA	F5GXY2;F5GYU2;P00338;P00338-2;P00338-5	0.872989	0.512323	12.5555	11.7624	12.3815	12.8486	12.8991	12.4887
DDX47	Q9H0S4;Q9H0S4-2	0.865994	0.506986	13.61	13.7087	12.8557	13.822	13.9573	13.916
CEP170	E5RFU8;E5RIH6;E5RJT5;Q5SW79;Q5SW79-2;Q5SW79-3	0.440689	0.505494	10.4712	9.66196	9.8382	10.5946	11.1805	9.71279
RFC1	P35251;P35251-2	0.431263	0.503701	11.4006	12.0423	12.4788	11.7117	12.7385	12.9826
SUPT5H	O00267;O00267-2	1.31343	0.50287	11.343	11.4604	11.2733	11.8703	11.5618	12.1533
ARAP1	Q96P48;Q96P48-3	1.40734	0.500937	9.70694	10.0873	10.0409	10.4285	10.2567	10.6528
RTCA	O00442;O00442-2	0.222471	0.500115	12.8821	10.5937	12.3745	13.5201	11.8355	11.9951
SRSF1	J3KTL2;Q07955	1.82481	0.497329	16.204	16.2106	16.289	16.6679	16.9615	16.5663
PGAM1	P18669	0.340294	0.496072	12.3606	12.7381	11.5208	12.9916	11.7586	13.3576
ADI1	Q9BV57	0.573445	0.494156	12.4041	11.3195	11.931	11.9703	12.7255	12.4414
ZNF618	Q5T7W0;Q5T7W0-2;Q5T7W0-4	0.744556	0.490056	12.4509	12.8274	11.9128	13.1491	12.8608	12.6514
DDX17	A0A1X7SBZ2;A0A5H1ZRQ2;Q92841	2.07787	0.489814	14.5979	14.5368	14.3442	14.9397	14.8961	15.1125
SNRPE	P62304	0.638318	0.488878	16.5168	17.2492	16.9784	17.0882	17.1789	17.9439
TGM5	A0A087WVW4;A0A087WZC4;O43548;O43548-2	0.418981	0.488077	11.819	13.2245	12.7259	13.1751	13.5027	12.5558
DDX3X	A0A0D9SF53;A0A0D9SFB3;A0A0D9SG12;A0A2R8Y4A4;A0A2R8Y5G6;A0A2R8Y645;A0A2R8Y7T2;A0A2R8YCW1;A0A2R8YDT5;A0A2R8YF78;A0A2R8YFR4;A0A2R8YFS5;A0A2U3TZJ9;O00571;O00571-2	1.2506	0.48481	15.3251	15.7823	15.2035	15.831	15.9623	15.9721
SRSF10	O75494;O75494-2;O75494-3;O75494-4;O75494-5;O75494-6;Q5JRI1	0.74747	0.480292	14.127	15.0511	14.3785	14.8297	15.1903	14.9776
NOP56	A0A494C128;H0Y653;H0YDU4;O00567	0.527753	0.47911	11.4578	10.2374	11.0541	11.0618	11.6563	11.4685
PKP1	Q13835;Q13835-2	0.573005	0.478611	14.2751	14.5606	14.7261	15.5027	15.1625	14.3324
ITCH	A0A1W2PR79;A0A590UJQ1;A0A590UJW8;A0A590UK44;A0A590UK95;Q96J02;Q96J02-2	0.4993	0.476063	10.5284	10.1817	11.3251	11.5564	11.1889	10.7181
IPO11	F8WDV0;Q9UI26;Q9UI26-2	0.197747	0.470633	12.6575	10.3071	11.9996	12.6059	12.8178	10.9524
MDH2	P40926;P40926-2	0.544212	0.46933	10.6677	10.6255	9.9633	10.6641	11.4922	10.5082
DDX52	Q9Y2R4	0.802986	0.467743	10.6127	9.78734	9.91836	10.6695	10.4079	10.6443
APIP	Q96GX9	0.846031	0.467626	14.2579	13.4414	14.0601	14.4819	14.4376	14.2427
GPX4	A0A087WT12;A0A087X247;A0A087X2I2;K7EJ20;K7EKX7;K7ENB4;K7ERP4;P36969;P36969-2;R4GNE4	0.117396	0.464541	12.5985	9.10561	8.9447	11.1995	11.7464	9.09655
DDB1	Q16531	1.54725	0.464457	21.1288	21.5309	21.3849	21.8389	21.6752	21.9239
TRIM25	Q14258	0.822274	0.461178	16.7269	16.0057	16.3856	16.637	17.1404	16.7244
RBM39	Q14498;Q14498-2;Q14498-3	1.47352	0.458539	16.0913	16.4687	16.0543	16.5541	16.6875	16.7484
JUP	P14923	0.422139	0.456457	16.3042	16.5066	16.5022	17.2892	17.4091	15.9841
TCP1	P17987	1.02574	0.454005	18.2992	18.8641	18.4342	18.8763	18.8588	19.2244
DDX46	A0A0C4DG89	0.939683	0.45345	14.4209	14.8362	14.7413	14.9989	14.8725	15.4874
U2AF1	Q01081	1.29896	0.450587	16.242	16.4336	16.2154	16.5138	17.0198	16.7091
KRT1	P04264	0.844832	0.444355	22.599	22.6539	22.7034	23.4667	23.1821	22.6405
SIAH1	Q8IUQ4;Q8IUQ4-2	1.67707	0.44224	15.7741	16.0017	15.7769	16.1255	16.4475	16.3064
PKM	P14618	0.577265	0.439595	15.9773	15.9316	15.9868	16.4391	16.9737	15.8017
SRRM1	A9Z1X7;Q8IYB3;Q8IYB3-2	1.81815	0.437462	14.5241	14.6958	14.7199	14.9154	15.2119	15.125
CCT2	P78371	1.03409	0.436647	18.1653	18.7286	18.3869	18.8167	18.6978	19.0762
TNS4	Q8IZW8	1.08552	0.434213	13.51	12.946	13.0907	13.6842	13.4528	13.7124
GTF3C3	A0A494C1S7;H7C143;Q9Y5Q9;Q9Y5Q9-2	0.281413	0.432976	11.3793	11.0985	11.3902	11.7749	12.7552	10.6368
S100A9	P06702	0.0819122	0.432843	14.9625	12.7348	9.65131	14.6688	12.9685	11.0099
NCBP2	P52298	0.294598	0.428808	13.1507	11.252	12.7248	12.9696	12.5474	12.8969
WDR12	Q9GZL7	0.518985	0.428726	11.3313	11.6293	11.0243	11.3907	12.3903	11.4901
PYGL	E9PK47;P06737;P06737-2	0.20028	0.421989	12.7161	10.9335	12.6928	12.8177	13.3287	11.4621
PCNA	P12004	0.0894976	0.419832	12.8045	8.0209	12.1475	12.2113	12.0833	9.93772
CWF19L1	A0A286YF56;Q69YN2	0.397058	0.419286	11.6118	10.5968	11.8979	12.075	11.3826	11.9067
KEAP1	Q14145	1.36773	0.418332	14.0679	14.0547	14.079	14.2787	14.4187	14.7592
HDAC10	C9J8B8;Q969S8;Q969S8-2	0.593782	0.415662	17.536	18.3073	17.6395	18.0962	17.9969	18.6366
ERO1A	Q96HE7	0.429043	0.414967	14.7536	13.6663	13.9925	14.7077	14.9031	14.0465
MTREX	P42285	0.131814	0.414751	12.1847	11.0712	10.2164	12.0255	13.0459	9.64515
FLNB	A0A804HK76;O75369;O75369-2;O75369-3;O75369-6;O75369-8;O75369-9	1.72103	0.413722	13.9501	13.9431	13.7402	14.1733	14.2469	14.4544
PFDN2	Q9UHV9	0.178694	0.412894	15.4878	13.264	14.6863	15.7949	15.0994	13.7826
NOM1	Q5C9Z4	0.216927	0.410986	10.4091	9.26976	11.0714	9.8555	11.6229	10.5048
RPS20	P60866;P60866-2	1.06247	0.409227	16.6117	16.5239	16.4241	16.6542	17.2476	16.8855
S100A6	P06703;R4GN98	0.108694	0.407943	15.7072	13.6783	14.1772	15.5951	16.6129	12.5786
CMBL	Q96DG6	0.772966	0.407412	15.295	14.8303	14.9136	15.3371	15.7941	15.1299
GEMIN4	I3L2C7;P57678	0.280179	0.40711	12.273	10.8906	12.2482	12.0394	12.9114	11.6824
SRSF3	P84103;P84103-2	0.613965	0.406075	17.8468	18.4168	17.7479	18.0318	18.435	18.763
IK	Q13123	0.0883913	0.405322	12.7265	10.6863	10.0669	11.8536	13.8644	8.97769
CRNKL1	Q5JY65;Q9BZJ0;Q9BZJ0-2;Q9BZJ0-3	0.251409	0.401837	9.8267	8.9184	10.6272	9.80999	10.9875	9.78032
HSPA8	P11142	2.4953	0.400805	19.9905	19.8391	19.9141	20.2944	20.2485	20.4032
GGCT	B8ZZK2;O75223	0.395567	0.398025	14.0791	13.3782	13.0345	14.1818	14.1963	13.3079
FLG2	Q5D862	0.328648	0.394122	15.5074	14.9335	14.8174	15.5734	16.2	14.6671
CCT4	P50991	0.682968	0.393906	18.3125	19.0694	18.5009	18.9394	18.8481	19.2771
SPRR1A	P35321	0.0628122	0.393449	13.6678	9.79132	12.3058	14.1204	14.2233	8.60157
IGHV3-72	A0A4W8ZXM2	0.321483	0.39064	24.6063	23.2479	24.3928	24.0899	24.9832	24.3458
;TGM3	A0A494C0J7;Q08188	0.291895	0.388778	14.919	14.9118	14.4609	15.8552	15.4591	14.1437
GAPDH	P04406	0.535907	0.388058	17.0245	16.4384	16.6764	17.1794	17.5252	16.5989
YTHDF2	Q9Y5A9;Q9Y5A9-2	0.347057	0.380495	13.3406	11.9867	12.2771	12.6208	12.8457	13.2793
HDAC2	Q92769;Q92769-3	0.364876	0.379356	15.274	15.6949	14.9515	14.9342	16.1135	16.0107
ELOB	Q15370;Q15370-2	0.375038	0.378346	15.1872	14.9105	13.9859	15.169	15.3911	14.6585
TUBB4A	P04350	0.550103	0.376655	14.4724	13.7407	14.3636	14.5874	14.9051	14.2141
LANCL3	Q6ZV70	1.38558	0.375031	13.3367	13.4778	13.5435	14.0404	13.7737	13.669
OGA	O60502;O60502-4	0.209137	0.372488	10.8622	11.0491	11.0952	10.6305	10.7485	12.745
CCT7	Q99832	0.685766	0.372348	17.9634	18.5159	18.1087	18.4812	18.3032	18.9206
NUB1	H3BM14;H3BM74;Q9Y5A7;Q9Y5A7-2	0.138897	0.369245	12.3289	9.81545	12.0117	12.2955	12.382	10.5863
ERCC3	A0A2R8Y6W8;P19447	0.131796	0.3684	12.0162	9.04791	12.0568	11.508	11.7915	10.9266
DDX46	Q7L014	0.777013	0.368064	15.9064	16.1895	15.8829	16.0099	16.3902	16.6829
SPRR2E	P22531	0.14682	0.367707	16.9078	15.4982	16.0614	17.6008	17.0934	14.8764
CDSN	G8JLG2;Q15517;Q2L6G8	0.307812	0.367305	15.8954	15.6067	16.1019	16.7398	16.6593	15.3069
RPL34	P49207	0.511701	0.363213	15.0714	16.014	15.6741	15.829	15.7833	16.237
;FIP1L1;FIP1L1;FIP1L1;FIP1L1	A0A0B4J203;Q6UN15;Q6UN15-3;Q6UN15-4;Q6UN15-5	0.185816	0.35916	13.3567	11.2128	12.9132	13.4605	12.826	12.2737
EIF6	P56537	0.801255	0.358656	14.1859	14.7956	14.6917	15.0875	14.823	14.8387
SNRPC	P09234	0.58217	0.356863	13.3378	13.7204	13.3536	13.5031	13.676	14.3033
FBXO22	Q8NEZ5	0.789848	0.351762	15.6903	15.9125	15.7796	15.9627	15.9391	16.5361
ALDH1A3	H0Y2X5;P47895	1.17241	0.351206	13.0528	13.3078	12.9068	13.4435	13.3034	13.5741
PRKACB	A0A087WVC4;A0A0A0MS54;B1APF7;B1APF8;B1APF9;B1APG0;B1APG1;B1APG2;B1APG3;P22694;P22694-2;P22694-3;P22694-4;P22694-5;P22694-6;P22694-7;P22694-8;P22694-9	0.144929	0.347719	11.0693	10.1984	9.12705	11.2985	11.0353	9.10411
LRRC1	Q9BTT6;Q9BTT6-2	0.287497	0.346877	12.5776	13.8053	13.2038	13.0232	13.4374	14.1669
LUC7L2	Q9Y383	0.467368	0.345585	15.9277	15.1868	15.3766	15.664	16.2995	15.5643
CCT8	P50990	0.602303	0.344252	18.5885	19.3357	18.8568	19.234	19.0612	19.5184
GATD3B;;GATD3B;GATD3B;GATD3;GATD3	A0A096LNH5;A0A096LPI6;A0A0B4J2D5;A0A0B4J2D5-2;P0DPI2;P0DPI2-2	0.293166	0.343843	12.9549	12.457	12.0641	12.7652	13.5594	12.183
XRCC6	B1AHC9;P12956	0.229095	0.341399	15.3188	13.8543	14.6165	15.0418	15.5772	14.1947
TTK	P33981;P33981-2	0.393076	0.340932	13.9541	14.7562	13.7293	14.4407	14.1804	14.8413
EIF3G	K7ENA8;O75821	1.06611	0.340685	14.6323	14.858	14.641	15.0977	15.2508	14.805
GNL3	Q9BVP2;Q9BVP2-2	0.5502	0.338771	12.8912	13.4595	13.0231	13.4546	13.8342	13.1013
RABL6	F2Z2T0;G3V154;Q3YEC7;Q3YEC7-2;Q3YEC7-3	0.1993	0.338006	11.1371	9.47078	11.1195	10.8467	11.547	10.3478
EXOSC4	Q9NPD3	0.384305	0.33702	13.754	13.2543	13.7769	14.001	14.4613	13.3339
CCT3	P49368	0.470447	0.336879	18.0658	18.8627	18.2307	18.6248	18.4494	19.0956
CARHSP1	Q9Y2V2	0.314651	0.335337	15.7367	14.8106	15.1736	15.8653	15.9685	14.8931
TDP1	E7EPD8;G3V2F4;H0YJ44;Q9NUW8;Q9NUW8-2	0.187674	0.333801	11.8692	11.47	12.1405	12.3051	10.9669	13.209
YWHAE	P62258;P62258-2	0.101907	0.333447	12.1224	9.53504	11.6839	11.5998	12.8592	9.8828
PUF60	A0A0J9YVP6;A0A0J9YXJ8;A0A0J9YXX5;A0A0J9YYL3;Q9UHX1;Q9UHX1-2;Q9UHX1-3;Q9UHX1-4;Q9UHX1-5;Q9UHX1-6	1.03342	0.330286	15.2295	15.2715	15.1307	15.4097	15.384	15.8288
KLHL18	O94889;O94889-2	0.639847	0.327323	11.3144	11.0452	11.3893	11.9212	11.6004	11.2093
CDC42	P60953	0.328275	0.326591	12.2304	13.0362	11.7337	12.3899	12.6696	12.9205
TBCD	A0A804HHW7;A0A804HI02;A0A804HI57;A0A804HIC0;A0A804HIN6;A0A804HIU1;A0A804HJ32;A0A804HJ57;A0A804HJY5;A0A804HKB9;A0A804HKT8;A0A804HL21;A0A804HL62;A0A804HLF8;A0A804HLI2;J3KR97;Q9BTW9;Q9BTW9-4;Q9BTW9-5	0.230341	0.32459	9.93595	10.2366	8.61345	10.1773	9.44457	10.1379
RPS21	P63220;Q8WVC2	0.473824	0.324544	17.2982	17.7875	17.4057	17.5486	18.3357	17.5807
DHX40	F5H625;Q8IX18;Q8IX18-2;Q8IX18-3;Q8IX18-4	0.436039	0.321628	12.0075	11.2233	11.6577	11.9412	12.3372	11.5749
EZR	E7EQR4;P15311	1.14092	0.32079	14.8594	14.8013	14.6508	14.8869	15.0959	15.2911
TRMT2B	Q96GJ1;Q96GJ1-2;Q96GJ1-3	0.179719	0.319396	11.4369	10.7651	9.6833	10.958	10.1764	11.7091
SERPINB4	P48594	0.0896554	0.319006	13.9874	12.6754	12.3474	14.3405	14.6237	11.0029
CCT5	P48643	0.549232	0.31822	17.3896	18.0661	17.581	17.9555	17.7453	18.2905
PSMD11	J3QRY4;O00231;O00231-2	0.229595	0.317345	14.1625	12.6004	14.1949	13.7252	14.0248	14.1598
PML	H3BT57;P29590;P29590-10;P29590-11;P29590-12;P29590-13;P29590-14;P29590-2;P29590-3;P29590-4;P29590-5;P29590-8;P29590-9	0.242093	0.315618	13.3944	13.3432	12.3458	12.7784	14.0786	13.1733
PKP3	Q9Y446;Q9Y446-2	0.258911	0.313238	12.0348	11.8897	11.2432	12.0196	12.7637	11.3241
ADGRA3	Q8IWK6;Q8IWK6-2	0.489466	0.30961	18.4836	19.2517	18.7274	19.1242	18.8623	19.405
DSG1	Q02413	0.291028	0.305663	16.51	16.6141	16.8284	17.3754	17.3663	16.1278
HRNR	Q86YZ3	0.264123	0.30562	16.397	17.6453	17.0981	17.04	17.9272	17.09
AP2A1	O95782;O95782-2	0.333105	0.304257	10.744	9.58438	10.5873	10.4112	10.7033	10.714
WDR45B	Q5MNZ6	0.555791	0.303551	13.371	12.9366	12.9782	13.5017	13.6797	13.0152
RCC1	P18754;P18754-2	0.220421	0.302435	12.884	12.0761	12.6154	12.3009	13.7844	12.3976
BZW2	E7ETZ4;Q9Y6E2	0.138162	0.30204	13.1292	11.6133	12.1525	12.6801	13.7281	11.3929
EIF4A3	P38919	0.925736	0.298491	14.5392	14.5953	14.7498	14.8126	14.768	15.1991
TRA2A	Q13595;Q13595-2;Q13595-3;Q13595-4	0.60793	0.297997	14.6338	14.4398	14.669	15.0321	15.137	14.4675
RPS12	P25398	0.662464	0.296296	16.1094	16.1331	16.0654	16.5343	16.6604	16.0022
HAL	P42357;P42357-2	0.142203	0.294635	11.7529	11.2595	10.3239	12.0919	12.0079	10.1204
KLK11	M0QYW4;M0R151;Q9UBX7;Q9UBX7-1;Q9UBX7-3;Q9UBX7-4	0.231995	0.292206	16.8461	17.8202	16.9486	17.1538	17.0708	18.2671
EIF3H	B3KS98;E5RFH0;E5RFW7;O15372	0.111933	0.290209	12.3806	9.76943	11.5437	12.3418	11.7154	10.5072
DSC1	Q08554-2	0.182494	0.289398	15.4287	15.5237	15.8604	16.5785	16.3829	14.7196
HEATR3	Q7Z4Q2;Q7Z4Q2-2	0.129144	0.288816	10.7163	10.0319	10.2029	11.106	11.6627	9.04887
PLCD3	H0YGF8;Q8N3E9	0.797148	0.288205	13.5769	13.9872	13.9828	14.2657	13.9473	14.1984
SRSF11	Q05519;Q05519-2;Q5T760	0.716861	0.287862	14.6637	14.9371	14.5106	14.9384	14.7896	15.247
SRSF2	J3KP15;J3QL05;Q01130;Q01130-2	0.336133	0.286033	15.5407	16.0361	15.6041	15.3857	16.3751	16.2783
CNN3	Q15417;Q15417-3	0.685894	0.284304	15.9615	15.3229	15.7488	15.9974	15.9434	15.9453
RSL1D1	I3L3U9;J3QSV6;O76021	0.376763	0.278439	12.495	13.3243	13.0917	12.8818	13.4991	13.3654
DGCR8	Q8WYQ5;Q8WYQ5-3	0.234734	0.274977	12.6335	11.7212	13.0709	12.8335	13.1039	12.3131
CCT6A	P40227	0.348909	0.274117	17.2061	18.0283	17.405	17.7216	17.5129	18.2271
PTPN11	Q06124;Q06124-1	0.228661	0.273682	15.8221	14.299	15.2206	15.1862	15.6889	15.2878
SF1	A0A7P0T9U7;Q15637;Q15637-2;Q15637-3;Q15637-4;Q15637-5;Q15637-6;Q15637-7	0.876416	0.27013	15.0053	14.582	14.6402	15.0362	15.0942	14.9076
TOP1	P11387	0.519004	0.26989	14.3766	14.769	13.9962	14.5535	14.7063	14.6917
DCD	P81605;P81605-2	0.118052	0.266374	15.555	15.2918	14.8761	15.8474	16.6866	13.9881
YRDC	Q86U90	0.681723	0.265862	16.016	16.1394	15.782	16.1104	16.5308	16.0937
RRP12	Q5JTH9;Q5JTH9-2;Q5JTH9-3	0.282262	0.265267	13.914	13.8802	13.8875	14.174	14.807	13.4964
TES	F8W7T0;Q9UGI8;Q9UGI8-2	0.178826	0.265196	10.2734	11.8078	11.1066	11.0028	10.9577	12.0229
FAM120B	A0A0D9SEJ5;F5GY05;Q96EK7	0.267	0.263255	12.9506	13.3185	12.494	13.7092	12.6238	13.2199
EARS2	Q5JPH6	0.669926	0.261696	12.8141	12.4184	12.8582	13.0365	13.0958	12.7435
NIBAN2	Q96TA1;Q96TA1-2	0.147568	0.258952	10.636	12.627	11.0303	11.2193	11.8891	11.9618
RRM2	P31350	0.499458	0.258673	14.582	14.5992	14.4636	14.5661	15.2507	14.604
PRPF8	Q6P2Q9	0.469174	0.258564	14.9692	14.7009	14.7597	14.8818	15.5151	14.8086
RANBP3	B7Z7F3;K7EIJ4;Q9H6Z4;Q9H6Z4-2;Q9H6Z4-3	0.34956	0.258352	12.3604	12.2594	12.7189	12.172	13.0775	12.8642
SEC61G	P60059	0.221864	0.257095	12.6687	12.5994	12.7075	12.9115	13.6988	12.1366
;LDHB;LDHB;LDHB;LDHB	A0A3B3IS95;A0A5F9ZHM4;A8MW50;C9J7H8;P07195	0.13666	0.255451	12.3446	10.1536	11.4964	12.0775	11.175	11.5085
TGM1	P22735	0.105931	0.255234	13.9308	12.7772	13.1727	14.355	14.3431	11.9484
RHBDD2	Q6NTF9;Q6NTF9-2	0.621093	0.25477	12.205	11.8318	11.8498	12.2782	12.4207	11.952
CHORDC1	E9PIZ4;E9PPQ5;E9PSD5;Q9UHD1	0.30463	0.254765	12.6701	13.2069	13.1386	13.168	12.8001	13.8119
SAE1	A0A590UK93;A0A590UKC5;B3KNJ4;M0QX65;M0QYM8;M0R054;Q9UBE0;Q9UBE0-2;Q9UBE0-3	0.578125	0.251698	12.2549	12.3674	12.0385	12.4731	12.18	12.7628
KIF23	A0A2U3TZL8;A0A7I2V5Y5;H7BYN4;Q02241;Q02241-2	0.0790238	0.251228	15.1805	12.2598	14.8802	14.6843	15.2476	13.1422
SRPK1	H3BLV9;Q96SB4;Q96SB4-3;Q96SB4-4	0.155634	0.250105	12.3377	11.9155	12.7094	12.89	13.3338	11.4891
RARS1	P54136	0.659394	0.249949	15.7623	16.1639	15.7437	15.9524	16.1585	16.3089
DHX9	Q08211	0.6623	0.248292	14.7793	14.9411	15.0236	14.8561	15.3391	15.2937
DSP	P15924	0.248155	0.248047	17.1811	17.3675	17.4889	18.0836	17.8646	16.8335
H1-4	P10412	0.303197	0.247459	16.4921	15.5405	15.7893	15.8869	16.2003	16.4771
CD2AP	Q9Y5K6	0.274068	0.246984	13.8682	13.5853	13.7725	13.5037	13.7902	14.673
KPRP	Q5T749	0.629351	0.246863	17.3564	17.5084	17.2602	17.7552	17.8094	17.301
PPP2R2A	P63151	1.53476	0.244589	15.6499	15.6664	15.6186	16.0338	15.8128	15.822
PRPF3	O43395;O43395-3	0.199769	0.244239	13.0428	12.899	12.3354	12.2266	13.122	13.6613
USP39	A0A087X1B2;B9A018;Q53GS9;Q53GS9-2	0.624583	0.243554	12.0752	12.172	12.2634	12.1992	12.7423	12.2998
PEPD	A0A494C165;A0A494C194;K7ES25;P12955;P12955-2;P12955-3;V9GYE4	0.431854	0.24313	13.4253	14.0506	13.3752	13.6994	13.826	14.055
DHX34	Q14147	0.0840736	0.241378	11.1781	8.89095	11.1718	9.31001	11.2537	11.4012
GPI	A0A2U3TZU2;P06744;P06744-2	0.100044	0.241169	10.4261	10.8298	10.86	10.0689	10.1167	12.6538
MOCS2	O96007	0.200203	0.238941	12.7925	13.7062	13.1165	13.3212	12.8666	14.1442
KRT4	P19013	0.049259	0.237369	14.9561	11.374	15.1494	16.2424	13.3197	12.6295
GCLM	P48507	0.65929	0.235676	15.8667	15.7285	15.3288	15.8861	15.8952	15.8497
PRMT1	Q99873-3	0.431458	0.234922	16.8244	16.4771	16.5859	16.8558	17.2304	16.506
H1-10	Q92522	0.108029	0.233452	12.7223	12.101	11.4274	11.5255	13.6816	11.744
LUC7L3	J3KPP4;O95232	0.355023	0.232944	12.4275	12.0894	12.4355	12.1317	12.99	12.5295
GOLGA4	Q13439;Q13439-3;Q13439-4;Q13439-5	0.432783	0.231516	12.7728	12.7855	12.9005	13.4046	12.6322	13.1166
FN3K	Q9H479	1.573	0.230823	16.0357	15.8222	15.9243	16.204	16.1094	16.1613
UNC13B	A0A1B0GUS7	0.0698914	0.228436	12.1762	12.6637	9.75532	11.8739	12.9215	10.4852
SMARCB1	A0A0G2JRV3;G5E975;Q12824;Q12824-2	0.696487	0.228022	13.3029	13.5475	13.1297	13.5538	13.4045	13.7059
ITPK1	Q13572	0.658659	0.227288	15.3578	15.5863	15.3757	15.8604	15.4	15.7413
SND1	Q7KZF4	0.293024	0.225888	13.6583	13.8294	13.9798	13.9131	14.6187	13.6134
PARK7	Q99497	1.47919	0.225739	19.788	19.7885	19.5795	19.9397	19.9683	19.9252
PRSS1	A6XGL3;E7EQ64;P07477	0.308321	0.225198	21.6621	22.1923	21.7546	22.1542	21.6371	22.4933
PFDN4	E9PQY2;Q9NQP4	0.466147	0.22459	13.7137	14.1115	13.6437	14.2872	13.7742	14.0813
RPL30	E5RI99;P62888	0.460683	0.224017	19.1336	19.6861	19.3012	19.3965	19.5509	19.8456
ABCF1	Q5STZ8;Q8NE71;Q8NE71-2	0.196673	0.223666	13.4636	12.9785	13.2583	13.3621	14.2168	12.7926
RNPS1	H3BMM9;H3BTC0;H3BV80;Q15287;Q15287-2;Q15287-3	0.632155	0.222925	15.7875	15.8304	15.414	15.7994	15.8254	16.0758
NANP	Q8TBE9	0.13867	0.222662	12.8619	12.2369	12.4136	11.9514	13.8234	12.4055
CLNS1A	E9PJF4;E9PMI6;J3KN38;P54105	1.0336	0.217805	14.4814	14.3864	14.3346	14.7961	14.515	14.5448
GHDC	K7ESN3;Q8N2G8;Q8N2G8-2;Q8N2G8-3	0.129728	0.217653	13.6099	12.173	12.6199	13.3829	13.5428	12.13
RO60	P10155;P10155-3;P10155-4;P10155-5	0.166847	0.217119	12.0759	10.9083	11.7919	12.1263	12.176	11.1252
MVP	H3BQK6;Q14764	0.110001	0.216801	12.4179	12.2647	12.1	12.1423	11.4555	13.8351
CNN2	B4DDF4;B4DUT8;Q99439	0.94703	0.2143	16.8939	17.1192	16.8438	17.0411	17.2467	17.2121
SF3B2	E9PPJ0;Q13435	1.23253	0.21073	15.3611	15.1139	15.2924	15.519	15.4086	15.4719
LUC7L	Q9NQ29;Q9NQ29-2	0.443707	0.209248	15.2252	15.5511	14.9433	15.2778	15.4422	15.6274
GOPC	F5H1Y4;Q9HD26;Q9HD26-2	0.297967	0.205272	12.6127	11.8118	12.6602	12.6487	12.5732	12.4786
VDAC2	A0A0A0MR02;P45880;P45880-1;P45880-2	0.872679	0.204396	13.7084	13.8606	14.0138	13.9372	14.1284	14.1305
ACTN4	O43707	0.156495	0.20247	14.9408	13.9009	14.4796	14.7405	15.2463	13.9419
DIMT1	A0A494C0G7;A0A7P0T9J1;A0A7P0T9Y7;A0A7P0Z4I0;Q9UNQ2	0.435318	0.202421	13.0009	12.4667	12.5742	13.0873	12.8699	12.692
PSMD9	J3KN29;O00233	1.02502	0.200733	15.5471	15.4441	15.4624	15.8243	15.5272	15.7043
CRKL	P46109	0.795397	0.199825	18.9186	19.186	18.8735	19.1442	19.1161	19.3173
TIGAR	Q9NQ88	0.641005	0.19853	13.776	13.999	13.8111	14.1006	13.8331	14.248
EIF4A1	P60842	0.829381	0.198385	15.778	15.9918	15.7578	15.8776	16.1314	16.1139
ZNF598	H3BPG6;H3BQQ2;Q86UK7;Q86UK7-2;Q86UK7-3	0.0888416	0.196571	10.1266	10.0139	8.69763	8.77798	9.6708	10.9791
ALKBH4	Q9NXW9	0.214878	0.195867	15.8985	16.8351	16.0544	16.4255	16.1233	16.8267
NOL11	J3QLQ6;Q9H8H0;Q9H8H0-2	1.02734	0.194049	12.8392	12.7443	12.9038	13.166	12.9087	12.9946
PSMA7	H0Y586;O14818;O14818-2	0.168373	0.189657	13.4967	12.7107	13.3082	13.8121	13.607	12.6655
SNRPN;SNRPB;SNRPB;SNRPB;SNRPN;SNRPN	J3QLE5;P14678;P14678-2;P14678-3;P63162;P63162-2	0.549084	0.188916	16.0902	16.1474	15.7378	16.0455	16.1672	16.3296
RPAP1	H3BRE8;Q9BWH6;Q9BWH6-2	0.253457	0.187392	12.1794	12.8766	12.1951	12.4375	12.4068	12.9691
HSPA5	P11021	1.09921	0.186616	16.4425	16.595	16.3781	16.5954	16.629	16.7511
PRPF4	O43172;O43172-2	0.137827	0.184913	10.4046	10.5126	10.9838	10.842	10.0057	11.6081
HAGH	H3BPK3;H3BPQ4;Q16775;Q16775-2	0.0417654	0.183598	8.46138	12.3527	10.1543	9.2918	9.76803	12.4593
UBE2S	K7EPJ1;Q16763	0.570581	0.183146	16.5156	16.6304	16.6844	16.7008	16.6221	17.057
UCK2	A0A2R8Y653;Q9BZX2	0.644114	0.182739	14.101	13.7725	14.0878	14.1152	14.0857	14.3086
DSC3	Q14574	0.05448	0.182023	13.0111	12.1421	12.6527	14.1061	13.6976	10.5484
CKAP4	Q07065	0.191295	0.180817	10.2712	9.68889	10.8878	10.6734	10.3868	10.3301
TNPO1	A0A7P0Z4D3;Q92973;Q92973-2;Q92973-3	0.0771027	0.18068	12.5633	14.4428	11.8106	12.8101	12.912	13.6367
TPR	P12270;P12270-2	0.0670945	0.178229	12.745	9.91753	11.9878	11.9124	12.2754	10.9972
EXOSC7	Q15024	0.222278	0.175321	13.032	12.5057	12.9637	12.7902	12.7107	13.5265
TBC1D4	O60343;O60343-2;O60343-3	0.572126	0.17507	13.0639	12.8698	13.2639	13.2897	13.3389	13.0941
CAPN1	P07384	0.218945	0.175022	14.1794	13.9877	13.5484	14.0903	14.5065	13.6437
PSMD8	K7EJR3;K7ENY6;P48556;R4GMR5	0.124062	0.174953	12.8381	11.6314	13.0844	13.1048	12.2297	12.7442
HSPA1B;HSPA1A;HSPA1B	A0A0G2JIW1;P0DMV8;P0DMV9	1.41723	0.174528	18.3781	18.2789	18.3439	18.5411	18.411	18.5723
ARL6IP4	A0A0C4DG62;F8WCT1;Q66PJ3;Q66PJ3-2;Q66PJ3-3;Q66PJ3-7	0.71487	0.172808	14.9595	14.6137	14.7076	15.011	14.9023	14.8859
GNB1L	Q9BYB4	0.501561	0.17164	15.6351	15.9929	15.5429	15.806	15.8719	16.0079
DHX15	O43143	1.15362	0.170511	16.6107	16.6151	16.4881	16.6629	16.8493	16.7133
NCBP2AS2	Q69YL0	0.0679677	0.169474	9.82326	8.82707	7.61919	8.19848	8.4784	10.1011
NFU1	Q9UMS0;Q9UMS0-3	0.118674	0.165499	15.2723	14.2175	15.0798	15.4475	15.3774	14.2412
AIMP2	A8MU58;Q13155;Q13155-2	0.0468971	0.165005	13.3833	10.2539	12.2347	11.8786	13.586	10.9023
PSMC4	P43686;P43686-2	0.0713321	0.164611	12.0379	12.1911	11.2523	10.493	12.5966	12.8855
PTBP3	O95758;O95758-5	0.469734	0.163678	14.1935	14.4362	14.0973	14.4281	14.2015	14.5884
BRAT1	Q6PJG6	0.150285	0.163252	13.9035	13.2484	13.8453	14.2679	14.0744	13.1447
GRWD1	Q9BQ67	0.114804	0.162591	13.8745	14.0947	13.1563	13.8113	14.6427	13.1594
SON	P18583-5	0.611723	0.159029	13.7018	14.0183	13.8995	13.9525	13.9697	14.1745
G3BP1	A0A7I2V5M7;A0A7I2YQN9;Q13283	0.17798	0.158627	14.0327	13.4047	13.4667	13.7382	14.2918	13.3499
SNRPD3	P62318;P62318-2	0.20922	0.157324	17.4953	18.028	17.4034	17.4565	17.7421	18.2001
IPO9	Q96P70	0.10688	0.157267	10.9618	10.2881	9.98915	10.691	11.2759	9.74395
TUBA4A	P68366;P68366-2	0.345131	0.156108	14.5829	14.5306	14.8737	15.0027	14.9402	14.5125
ZFYVE16	Q7Z3T8;Q7Z3T8-3	0.184713	0.152469	11.9975	12.6384	12.1875	12.1471	12.2058	12.9279
LAMP1	P11279;P11279-2	0.0745741	0.152384	10.6113	10.729	9.07737	10.3052	11.1189	9.45072
RIF1	H7C2B5;Q5UIP0;Q5UIP0-2	0.0985016	0.151923	13.2796	12.5081	13.338	13.7103	13.6443	12.2269
PFN2	G5E9Q6;P35080-2	0.385353	0.151487	18.9258	19.3052	18.9493	19.0528	19.1567	19.4252
SRRM2	Q9UQ35	0.369941	0.151403	16.013	16.0235	16.0751	15.9691	16.073	16.5236
NUBP1	P53384;P53384-2	0.102193	0.14726	14.5947	13.3858	14.0258	14.5318	14.5323	13.3839
PFAS	O15067	0.25408	0.145743	14.7896	15.2546	15.007	15.033	14.9296	15.5259
HPF1	Q9NWY4	0.114251	0.144918	9.75951	9.94001	10.2619	10.6827	10.443	9.27038
EBNA1BP2	H7C2Q8;Q99848	0.0317043	0.144732	11.2681	11.1569	10.4376	8.53132	13.7821	10.9835
EMC1	Q8N766;Q8N766-2;Q8N766-3;Q8N766-4	0.2929	0.144649	12.3119	12.4089	12.8208	12.4231	12.8494	12.703
HNRNPL	P14866	0.459292	0.141582	16.168	16.335	16.0233	16.1634	16.2885	16.4991
HLA-C	A0A140T921;A0A140T9H5;A0A140T9U8;A2AEA2;O19617;P10321;P10321-2	0.268708	0.140548	14.0468	13.7113	13.654	13.9118	14.2535	13.6685
UBE2N	P61088	0.139734	0.139766	14.3703	15.2076	14.4274	14.3443	14.865	15.2154
PSMA5	P28066	0.0743001	0.139251	12.7289	11.1796	11.5242	12.2019	12.5923	11.0563
C8orf33	A0A3B3IT54;Q9H7E9;Q9H7E9-2	0.252837	0.138732	14.4358	13.756	13.8408	14.0861	14.1368	14.2258
ABI1	A0A0A0MRT6;B6VEX4;Q8IZP0;Q8IZP0-10;Q8IZP0-11;Q8IZP0-12;Q8IZP0-2;Q8IZP0-3;Q8IZP0-4;Q8IZP0-5;Q8IZP0-6;Q8IZP0-7;Q8IZP0-8;Q8IZP0-9	0.0916578	0.13758	13.8719	14.813	13.7757	14.4191	13.5076	14.9468
DEFA1B;DEFA3	P59665;P59666	0.0455257	0.135784	12.117	12.7149	12.2445	14.4264	11.0594	11.998
SAP18	O00422;O00422-2	0.715043	0.135363	15.9179	15.739	15.6743	15.9988	15.8386	15.9
MYH3	P11055	0.106192	0.134321	13.6591	14.8569	13.8254	14.1767	13.8371	14.7306
ALB	A0A0C4DGB6;P02768	0.0521805	0.134041	15.7934	15.7541	14.9237	16.7145	16.1797	13.9791
MAPK10;MAPK10;MAPK10;MAPK10;MAPK10;MAPK10;MAPK10;MAPK10;MAPK10;MAPK10;MAPK10;MAPK10;MAPK10;MAPK10;MAPK10;MAPK10;MAPK10;MAPK10;MAPK10;MAPK10;MAPK10;MAPK10;MAPK10;MAPK10;MAPK10;MAPK10;MAPK10;MAPK10;MAPK10;MAPK10;MAPK10;MAPK10;MAPK9;MAPK9;MAPK10;MAPK9;MAPK9;MAPK9;MAPK9;MAPK9;MAPK9;MAPK10;MAPK10;MAPK10	A0A1P0B7D2;A0A1W2PRF2;A0A286YEN5;A0A286YEQ0;A0A286YEQ7;A0A286YES0;A0A286YES9;A0A286YEV3;A0A286YEW9;A0A286YEX7;A0A286YEY0;A0A286YF02;A0A286YF19;A0A286YF35;A0A286YF62;A0A286YF83;A0A286YF85;A0A286YF97;A0A286YFA6;A0A286YFB6;A0A286YFC0;A0A286YFD7;A0A286YFE2;A0A286YFI3;A0A286YFJ4;A0A286YFJ6;A0A286YFK3;A0A286YFM6;A0A286YFN2;D6R9C1;D6RCB1;D6RJF9;D7R525;E5RJ57;F8W9R5;J3KNK1;P45984;P45984-2;P45984-3;P45984…	0.161229	0.130021	12.802	13.1984	12.7582	12.5742	13.0705	13.504
TSG101	F5H442;Q99816;Q99816-2	0.107421	0.129718	14.6019	13.644	14.4131	14.7704	14.563	13.7148
MASTL	A0A087WUU7;Q96GX5;Q96GX5-2;Q96GX5-3	0.133279	0.129667	12.476	13.6087	12.807	13.1265	12.8648	13.2894
MDH1	A0A5K1VW95;P40925;P40925-3	0.0891979	0.128611	12.8311	14.3046	13.684	13.5006	13.4048	14.3002
VDAC1	P21796	0.133396	0.128531	13.2774	12.5756	13.5906	12.8986	13.4892	13.4415
C11orf54;;C11orf54;C11orf54;C11orf54;C11orf54	A0A087WT99;A0A1W2PRB8;E9PQS1;Q9H0W9;Q9H0W9-2;Q9H0W9-3	0.0480867	0.12806	12.6309	11.7314	10.6013	12.822	12.0716	10.4542
SMC1A	A0A6Q8PHC3;G8JLG1;Q14683	0.278116	0.127711	12.245	12.0897	11.7824	12.3905	12.1508	11.9588
EXOSC2	Q13868	0.436664	0.125594	13.3055	12.9716	12.9858	13.1933	13.125	13.3214
SNRNP70	P08621;P08621-2	0.172588	0.124969	15.8181	16.3294	15.9084	15.8399	16.0096	16.5813
GSPT1	P15170-2;P15170-3	0.138435	0.124355	14.5646	15.0856	14.6326	14.6885	14.513	15.4544
LANCL1	O43813	0.343602	0.124239	17.463	17.2369	17.2731	17.5311	17.625	17.1896
LDLR	H0YMD1;J3KMZ9;P01130;P01130-3;P01130-4;P01130-5;P01130-6	0.199254	0.123839	13.4058	13.943	13.6437	13.4291	13.9158	14.019
ALOXE3	J3KPH2;Q9BYJ1;Q9BYJ1-2	0.0801231	0.122423	13.8239	14.7615	13.2604	14.4906	13.4546	14.2678
PPP2CB;PPP2CA	P62714;P67775	0.0728666	0.122264	14.8571	13.5805	14.2359	14.9371	14.6596	13.4436
PPP1CC	F8VR82;F8VYE8;P36873;P36873-2	0.278995	0.122018	12.8146	12.8132	12.9207	12.9401	13.2843	12.6901
GLOD4	F6TLX2;Q9HC38-2	0.459712	0.120773	16.7044	16.6024	16.4878	16.8885	16.707	16.5615
PSMB2	A0A087WVV1;P49721	0.107361	0.119707	14.7935	14.3609	14.7957	15.1111	15.1787	14.0194
RAB18	Q9NP72	0.321998	0.11878	15.744	15.8317	15.4195	15.7504	15.9446	15.6566
PIAS2;PIAS2;PIAS3;PIAS3;PIAS2;PIAS2;PIAS2;PIAS2;PIAS2;PIAS2;PIAS2;PIAS3;PIAS3	A0A087WUY7;A0A0A0MS92;E7ESB4;E9PHH8;K7EJT4;K7EMP6;K7EQX5;K7ER97;O75928;O75928-2;O75928-3;Q9Y6X2;U3KQV1	0.105518	0.118443	10.7547	11.6632	11.1453	11.1007	10.907	11.9108
SLC2A1	P11166	0.24961	0.1179	14.8782	14.9026	14.8235	14.8052	15.3573	14.7955
PDIA6	Q15084;Q15084-2;Q15084-3;Q15084-4;Q15084-5	0.229621	0.116947	17.8812	18.1632	18.1702	18.2262	17.8676	18.4717
UBA3	F8W8D4;Q8TBC4;Q8TBC4-2	0.0370824	0.116873	9.32687	9.9748	8.56585	7.43376	10.4893	10.2951
HNRNPM	A0A087X0X3;P52272;P52272-2	0.185224	0.116742	17.6944	18.182	17.6839	17.7484	17.8451	18.317
PPIL4	Q8WUA2	0.258623	0.113715	14.6824	14.7502	15.0024	15.1656	14.9473	14.6632
RFC2	P35250	0.182596	0.113136	13.4743	13.7692	13.2781	13.2813	13.649	13.9307
PITPNB	A0A0A0MSW4;B3KYB6;B3KYB7;P48739;P48739-2;P48739-3	0.160476	0.113026	12.6133	13.1103	13.0481	13.0267	12.6728	13.4113
PPIG	A0A7I2V4W3;A0A7I2V5Q5;A0A7I2V629;C9JN15;Q13427;Q13427-2	0.144402	0.112674	13.7073	13.8855	13.1552	13.3214	13.9257	13.8389
EEF2	P13639	0.262645	0.112045	19.1232	19.5135	19.1672	19.232	19.2968	19.6113
SNRNP40	Q96DI7;Q96DI7-2	0.100057	0.11036	12.9542	13.9382	13.1417	13.0376	13.4061	13.9215
JPT2	A6NGP5;H3BU16;Q9H910;Q9H910-2;Q9H910-3	0.113723	0.110331	13.3217	12.8903	12.9009	12.5038	13.4754	13.4646
UBA6	A0AVT1	1.21495	0.109487	15.805	15.7601	15.8591	15.9188	15.8628	15.971
KRT2	P35908	0.104906	0.109468	20.9717	20.8978	20.815	21.5611	21.1565	20.2953
ILF3	Q12906;Q12906-7	0.152839	0.108549	15.3949	15.6006	15.4574	15.1626	16.0552	15.5608
WDR6	A0A087X295;Q9NNW5	0.0556341	0.108225	12.1657	10.6805	12.3998	12.3553	12.1525	11.0628
PLAA	Q9Y263	0.0461001	0.105664	10.7636	9.89888	10.3271	11.1818	11.1755	8.94927
SNRPD2	P62316	0.0823272	0.105351	16.639	16.7363	16.109	16.4074	17.3838	16.0092
ZNF207	J3KS31;J3QRS9;O43670;O43670-2;O43670-3;O43670-4;X6R4W8	0.204306	0.105193	13.6308	13.1453	13.3752	13.4655	13.744	13.2574
CBX3	Q13185	0.029783	0.104677	15.1029	12.7223	14.433	14.9686	15.2966	12.3069
EEF1A1	P68104	0.199772	0.104167	22.6101	23.0565	22.6446	22.6234	22.8908	23.1096
FLG	P20930	0.0368952	0.104059	13.5981	12.7262	12.5674	13.6954	14.2164	11.2921
DDX1	A0A087WZ71;A0A087X2G1;A0A7I2V2M5;A0A7I2V430;A0A7I2V4F0;Q92499;Q92499-2;Q92499-3	0.0719447	0.103365	13.5945	13.5943	13.5689	13.8225	14.4868	12.7586
RPL37A	C9J4Z3;P61513	0.0591911	0.10303	15.72	15.1371	14.3245	15.403	15.7894	14.2982
HSD17B4	A0A2R8YD50;A0A804HK65;A0A804HKU2;E7EPL9;P51659;P51659-2;P51659-3	0.0747321	0.10286	13.3036	12.113	12.7349	12.1818	12.9365	13.3418
IPO5	H0Y8C6;O00410;O00410-3	0.278638	0.102798	18.3368	17.9781	18.1907	18.2686	18.4556	18.0897
FARSB	Q9NSD9	0.543212	0.100503	17.7851	17.7647	17.5968	17.8115	17.915	17.7216
MMS19	Q96T76;Q96T76-8;Q96T76-9	0.0527878	0.0993601	13.3011	11.6174	13.6065	12.5932	13.2608	12.9692
NUDT16L1	Q9BRJ7	0.80712	0.0983181	17.3808	17.4866	17.4205	17.4496	17.5209	17.6124
TBCC	Q15814	0.026609	0.0982377	12.8828	11.1354	11.7502	12.836	13.4343	9.79286
PRPF38B	Q5VTL8	0.128333	0.0974003	13.5505	14.4458	14.0059	13.9318	14.074	14.2886
KRT10	P13645	0.0830008	0.0972544	20.8642	20.677	20.4755	21.466	20.7587	20.0837
S100A14	Q9HCY8	0.0340622	0.0972214	13.3716	11.6809	12.5985	13.8295	13.07	11.0431
CAPZB	P47756-2	0.148965	0.0967929	17.2778	16.6737	17.0438	17.2554	17.2676	16.7627
PRMT3	O60678;O60678-2	0.288046	0.0961539	12.235	12.1772	12.0273	12.118	12.4822	12.1277
ILKAP	Q9H0C8	0.125196	0.0961488	13.2985	13.8838	13.1139	13.3099	13.4379	13.8368
ADRM1	Q16186	0.0869517	0.0930831	14.9592	15.8354	15.0713	15.0268	15.2253	15.893
KRT13	P13646	0.0889188	0.0928148	18.1177	18.2974	17.6963	18.7348	17.6184	18.0367
RANBP1	C9JDM3;C9JGV6;C9JIC6;C9JJ34;C9JXG8;F6WQW2;P43487;P43487-2	0.0286516	0.0922289	14.205	12.6819	13.3763	13.3573	15.2975	11.885
SRSF6;SRSF6;SRSF6;;SRSF6;SRSF6	A0A590UJK4;A0A590UJP7;A0A590UK01;A0A590UK80;Q13247;Q13247-3	0.120626	0.0920798	16.6927	17.4034	16.9174	16.9309	16.8965	17.4624
TKT	A0A0B4J1R6;P29401;P29401-2	0.160706	0.09069	14.5626	14.9618	14.541	14.7628	14.5074	15.0673
CYFIP1	Q7L576	0.593634	0.0902964	16.4765	16.7089	16.5786	16.6582	16.6893	16.6875
CAT	P04040	0.0710394	0.0893256	14.05	13.7435	13.3739	14.1707	14.2407	13.024
SMARCA5	O60264	0.122691	0.0880264	13.3093	12.8384	13.5521	13.19	13.1389	13.635
NCKAP1	Q9Y2A7;Q9Y2A7-2	0.152696	0.0866884	14.9003	15.453	14.9462	15.0527	15.0881	15.4187
TXNL1	O43396	0.271636	0.0862783	18.7051	19.0634	18.8191	19.0904	18.871	18.885
HMGA1	P17096;P17096-3	0.0201861	0.0851399	13.9374	9.77847	10.571	11.259	12.6398	10.6435
NECAP1	A0A1W2PPF5;A0A1W2PR09;A0A1W2PR27;A0A1W2PRL5;A0A1W2PRM0;A0A1W2PRQ7;F5GYH1;Q8NC96;Q8NC96-2	0.0377056	0.0851202	10.9837	9.99045	9.40454	11.3646	9.2822	9.98725
NSUN5	Q96P11;Q96P11-2;Q96P11-4	0.216316	0.0841827	14.0135	13.6132	13.723	13.7884	14.0527	13.7611
UBL5	Q9BZL1	0.0888731	0.0816069	13.3341	12.5067	13.2415	13.4661	13.0672	12.7938
PRMT5	O14744	0.490418	0.0813351	15.1769	15.2147	15.141	15.2733	15.3705	15.1326
BUD31	P41223	0.017479	0.0810111	12.5637	9.67291	7.67297	10.3246	8.9108	10.9172
PSMB3	A0A087WUL2;A0A087WXQ8;A0A087WY10;P49720	0.0321424	0.0797421	12.5966	10.8678	12.5991	12.8373	12.567	10.8983
LANCL2	Q9NS86	0.549139	0.0789261	16.7514	16.6187	16.6263	16.6582	16.7556	16.8194
KRT8	P05787;P05787-2	0.128252	0.0787875	14.3683	14.2076	14.5459	14.7886	14.4827	14.0869
HSPA9	A0A7I2V2G2;D6RCD7;P38646	0.943655	0.0784079	16.891	16.8725	16.7904	16.9501	16.9562	16.8827
UBE2I	B0QYN7;H3BPC4;H3BQQ9;P63279	0.150396	0.075579	13.7722	13.3665	13.4816	13.4969	13.4491	13.901
ARG1	P05089;P05089-2	0.0826003	0.0748256	14.8898	15.2129	15.0606	15.5512	15.3033	14.5332
PPP4R1	Q8TF05;Q8TF05-2	0.0353764	0.0741876	11.6425	9.62653	11.8047	11.2723	11.1376	10.8863
GMPS	P49915;P49915-2	0.138158	0.0738297	14.7906	14.8447	14.486	14.6437	15.1055	14.5936
KHSRP	M0R0C6;Q92945	0.135266	0.0736357	18.7299	19.1854	18.6628	18.7904	18.8468	19.1618
YWHAZ	P63104	0.0580119	0.0733983	15.5059	14.5311	15.4163	15.597	15.4628	14.6136
MPP7	Q5T2T1	0.106979	0.073156	13.7171	14.3745	13.8936	13.778	14.275	14.1516
SRPRA	P08240;P08240-2	0.03486	0.0727456	12.1975	11.8583	11.6869	12.7193	12.6331	10.6085
PPA1	Q15181	0.162798	0.0726833	15.1869	14.6718	14.9063	15.1181	15.0135	14.8514
MFAP1	P55081	0.0611644	0.0722675	13.7394	14.2687	13.6199	14.0845	13.2711	14.4892
WASF2	Q9Y6W5	0.161035	0.0718288	14.1296	14.5145	14.1039	14.4022	14.443	14.1182
LYPLA1	A0A087X1K9;E5RGR0;E5RJ48;O75608;O75608-2	0.0880952	0.0716308	12.9396	13.7802	13.0072	13.1268	13.3296	13.4854
CAPNS1	A0A0C4DGQ5;K7ELJ7;P04632	0.115944	0.0711145	14.6219	14.1184	14.7683	14.5976	14.7423	14.3819
MAPKAP1	B1AMB1;B1AMB2;Q9BPZ7;Q9BPZ7-2;Q9BPZ7-3;Q9BPZ7-5;Q9BPZ7-6	0.04647	0.0708342	10.8372	11.7057	10.4255	10.6017	10.8088	11.7704
BOLA2B	Q9H3K6	0.110666	0.0687574	18.9579	19.5762	18.9323	19.1199	19.1731	19.3796
ALOX12B	O75342	0.0240344	0.0682618	12	11.6034	11.4979	12.9344	12.4578	9.91392
HNRNPH1	G8JLB6;P31943	1.24145	0.0676028	17.88	17.8157	17.8881	17.9299	17.9481	17.9086
EIF5	P55010	0.040812	0.067078	9.66275	9.37504	9.33931	10.6231	8.91249	9.04277
SYNCRIP	A0A7I2V4Z0;A0A7I2YQN2;O60506;O60506-3	0.276704	0.066927	15.2977	15.051	15.1457	15.1018	15.3093	15.2841
CAND1	A0A0C4DGH5;Q86VP6;Q86VP6-2	0.0198561	0.0665827	11.3509	9.77059	10.4249	11.4424	11.7502	8.55364
RABGGTB	P53611	0.0419451	0.0651274	14.5794	13.616	13.2986	14.0725	14.4175	13.1993
USP5	P45974;P45974-2	0.210469	0.0642236	15.5421	15.4414	15.531	15.6825	15.6833	15.3413
CAPZA2	P47755	0.171324	0.060648	17.5229	17.8794	17.4517	17.6455	17.6747	17.7157
NTMT1	Q9BV86	0.0773287	0.0602407	14.4147	14.9661	14.2053	14.6499	14.297	14.82
SF3B6	Q9Y3B4	0.0484632	0.0584319	15.5744	14.512	15.4985	15.1496	15.6966	14.9139
THUMPD1	H3BNW0;Q9NXG2	0.0452148	0.0575879	11.6257	11.6047	10.7723	11.1752	10.956	12.0444
NOP58	H7BZ72;Q9Y2X3	0.0416273	0.05697	11.9893	11.5328	11.6741	12.1686	12.2985	10.9001
EEF1G	P26641	0.100917	0.0569261	15.2729	14.6744	15.1131	14.9255	15.0535	15.2522
SRSF7	A0A0B4J1Z1;C9JAB2;Q16629;Q16629-2;Q16629-3;Q16629-4	0.061951	0.0555077	17.0278	17.3982	17.3366	17.3128	16.8072	17.8091
STAT3	A0A7I2V2G1;A0A7I2V2T1;A0A7I2V395;A0A7I2V3V0;A0A7I2V444;A0A7I2V4C8;A0A7I2V4F6;A0A7I2V4R2;A0A7I2V4R3;A0A7I2V552;A0A7I2V5N9;A0A7I2YQD2;A0A7I2YQI1;A0A7I2YQR5;P40763;P40763-2;P40763-3	0.021049	0.052146	13.0436	11.0292	12.5121	12.5278	13.0543	11.1593
CTPS1	P17812	0.21752	0.0510286	18.648	18.8431	18.5895	18.6456	18.7976	18.7905
ISYNA1	Q9NPH2	0.0587168	0.0501321	16.067	16.8145	16.2617	16.2029	16.2759	16.8148
G3BP2	A0A7I2V382;A0A7I2V3P9;A0A7I2V647;A0A7I2YQD9;Q9UN86;Q9UN86-2	0.0133923	0.0500809	12.0527	12.0984	11.8867	9.81824	14.0772	12.2927
KRT19	P08727	0.0476084	0.0483557	18.1081	17.5123	17.9499	18.3303	18.0563	17.3288
ELAVL1	Q15717;Q15717-2	0.0617036	0.0467968	16.1988	15.5256	15.6816	16.0281	16.0034	15.515
ACACA	Q13085;Q13085-2;Q13085-3;Q13085-4	0.19819	0.0466569	14.2219	14.3056	14.102	14.3261	14.1192	14.3241
SF3B1	O75533	0.041968	0.0461051	14.7055	13.7621	14.5711	14.428	14.773	13.9761
;;CTSD;CTSD;CTSD;CTSD;CTSD;CTSD;;CTSD	A0A1B0GU03;A0A1B0GU92;A0A1B0GV23;A0A1B0GVD5;A0A1B0GW44;A0A1B0GWE8;C9JH19;F8W787;H7C469;P07339	0.0459298	0.0460656	13.7958	14.0351	13.6509	13.981	14.3731	13.2658
IREB2	P48200	0.0497532	0.0460049	13.3842	12.854	13.118	13.445	13.4405	12.6087
SEC24B	O95487;O95487-2;O95487-3	0.0890609	0.0459108	13.7561	14.2144	13.6385	13.8503	13.8772	14.0193
LMNA	A0A6Q8PFJ0;P02545	1.25376	0.0437876	16.0515	16.0657	16.0394	16.0698	16.0983	16.1199
BCCIP	Q9P287;Q9P287-2;Q9P287-3;Q9P287-4	0.0263013	0.0422417	11.9169	11.6078	10.5005	11.1659	12.0217	10.9643
RIN1	E9PNR2;Q13671;Q13671-2	0.103694	0.0401459	13.8843	13.9531	13.9927	14.1053	14.1327	13.7125
STK39	Q9UEW8;Q9UEW8-2	0.0567444	0.0389182	15.1998	14.4655	14.741	14.9873	14.8897	14.6461
NUMA1	Q14980;Q14980-2;Q14980-3;Q14980-4	0.0870968	0.0362177	13.2583	12.8188	13.2573	13.1866	13.1276	13.1289
LYPLA2	O95372	0.123891	0.0359271	16.0862	15.8881	15.9812	16.1996	15.9354	15.9283
U2SURP	E7ET15;O15042;O15042-2	0.0499316	0.0341759	13.237	12.8861	13.2219	13.2866	13.4152	12.7456
EFTUD2	Q15029;Q15029-2	0.090316	0.0340055	18.125	18.2827	18.1452	18.1638	18.035	18.4561
MAP2K4	P45985;P45985-2	0.0383531	0.0339464	13.42	13.7686	12.9187	13.1421	13.3407	13.7263
DOCK7	Q96N67;Q96N67-2;Q96N67-3;Q96N67-4;Q96N67-5;Q96N67-6	0.071432	0.0332959	12.8828	12.7761	12.5604	12.6014	13.0346	12.6833
HNRNPLL	C9IYN3;Q8WVV9;Q8WVV9-4;V9GYK2	0.0299389	0.030173	14.5461	13.8761	14.1909	14.4066	14.6074	13.6897
TNFAIP8L1	Q8WVP5	0.0189157	0.0298535	11.2978	12.617	11.8072	11.6806	11.4868	12.6442
DDX5	J3KTA4;P17844	0.092267	0.0292536	17.6719	17.4509	17.4698	17.6308	17.6648	17.3848
XRN2	Q9H0D6;Q9H0D6-2	0.0436018	0.028911	14.5996	15.0294	14.281	14.6493	14.563	14.7845
CDK2	G3V5T9;P24941	0.0639326	0.0283397	15.2837	15.2404	15.1353	15.0519	15.1549	15.5376
PNN	Q9H307	0.0268346	0.028251	14.0608	13.0421	13.9119	13.9722	13.6892	13.4381
DDX20	A0A7P0T9T8;Q9UHI6	0.0115577	0.0278254	12.9833	12.5658	12.3603	12.7716	11.2749	13.9463
RSRC2	Q7L4I2;Q7L4I2-2	0.0254258	0.0259113	14.7873	15.5325	14.8426	14.723	14.973	15.5441
PAICS	P22234	0.0448974	0.0256157	16.4827	17.0074	16.447	16.5351	16.6996	16.7793
GSDMA	Q96QA5	0.0125827	0.0253789	12.8863	12.1524	12.2534	13.3273	12.798	11.243
PLS3	P13797;P13797-3	0.0456641	0.025087	15.3323	15.5905	15.9243	15.5065	15.643	15.7728
ATE1	F5GXE4;O95260-2	0.0185827	0.0247113	12.7792	12.6886	12.7384	13.6067	12.5536	12.12
CDKN2AIPNL	Q96HQ2;Q96HQ2-2	0.0222464	0.0245463	13.5718	14.7211	13.8315	13.9299	13.9615	14.3067
TOE1	Q96GM8;Q96GM8-2	0.0319573	0.0239538	13.4459	13.0853	12.9774	12.7883	13.3047	13.4875
ISOC2	Q96AB3	0.0338362	0.021979	17.4494	17.9649	17.5649	17.5113	17.5443	17.9895
RBM25	P49756	0.0299742	0.0218506	14.3254	14.8713	14.3842	14.2983	14.4651	14.8831
TSN	E9PGT1;Q15631	0.0188932	0.0206941	14.1113	14.6666	14.0532	14.3098	13.7593	14.8241
ADAR	A0A7P0Z4F9;P55265;P55265-4;P55265-5	0.0673349	0.0202408	15.9644	16.2342	16.0619	15.9976	16.0887	16.235
RARS2	Q5T160	0.00803084	0.019989	11.1692	9.40221	10.7591	10.9198	11.2337	9.23699
FTO	A0A1B0GTC3;A0A1B0GTC5;A0A1B0GU26;A0A1B0GUC3;A0A1B0GV98;A0A1B0GVH5;Q9C0B1	0.013754	0.0184409	13.2027	12.3812	12.7313	13.2116	13.1152	12.0438
PAPSS1	O43252	0.0446745	0.0182489	13.8746	13.6453	13.7584	13.9717	13.8111	13.5502
PCBP1	Q15365	0.020231	0.018191	18.6548	19.3779	18.778	18.8086	18.7068	19.3498
UBAP2	Q5T6F2	0.0299033	0.0180995	13.6083	13.3447	13.4713	13.5356	13.7967	13.1464
EFHD2	Q96C19	0.0152157	0.0175419	13.8489	13.6005	14.047	13.1678	13.9932	14.388
SMYD5	Q6GMV2	0.0164683	0.0172599	14.3742	14.3311	13.6754	13.791	13.9805	14.661
DDX41	Q9UJV9	0.00451591	0.0167742	12.6015	10.1659	10.6475	11.6443	12.521	9.29994
PIK3R2	E9PFP1;O00459	0.0179345	0.0161692	13.4302	13.4826	12.7001	13.2481	12.9285	13.4847
CTNNB1	A0A2R8Y543;A0A2R8Y5A3;A0A2R8Y5C3;A0A2R8Y5Z1;A0A2R8Y750;A0A2R8Y7Z0;A0A2R8Y804;A0A2R8YCH5;B4DGU4;P35222	0.0519259	0.0161295	12.7402	12.6469	12.3968	12.5517	12.6501	12.6305
MTAP	Q13126	0.0426356	0.0153192	16.4162	16.471	16.1953	16.5523	16.3092	16.267
DNPEP	E5RIA4;E7ETB3;Q9ULA0;Q9ULA0-2	0.0112547	0.0145868	17.4659	16.8844	17.3623	17.0425	18.0044	16.7095
NUDCD1	Q96RS6	0.0223907	0.0145464	14.3909	14.3438	14.2028	14.5718	13.9103	14.499
PARS2	Q7L3T8	0.0230835	0.0141986	15.4197	14.9243	15.2334	15.0759	15.4985	15.0456
UBE3C	Q15386;Q15386-2	0.0164225	0.013155	12.7728	13.3959	13.1011	13.1522	12.7425	13.4145
RUFY1	H0YA47;H0YAC8;Q96T51;Q96T51-2	0.0102636	0.0130059	11.1059	9.95917	9.92637	10.5999	10.0652	10.3653
PFN1	P07737	0.00437608	0.0124063	13.104	10.4851	11.71	12.3881	12.2412	10.7071
SMC2	O95347;O95347-2;Q5T821	0.00675864	0.012359	10.6081	11.159	9.91009	9.85934	10.3719	11.4831
CTU2	H3BSW6;Q2VPK5	0.0179268	0.00979646	15.4418	14.8716	15.279	15.2362	15.3024	15.0831
DIAPH1	A0A0G2JH68;A0A140T8Z0;A0A2R8Y5N1;H9KV28;O60610;O60610-2;O60610-3	0.011431	0.00922489	11.6759	11.2645	11.8395	11.2296	11.6455	11.9325
GNA14;GNA11;GNAQ	O95837;P29992;P50148	0.00392254	0.00481669	13.8693	13.8739	13.3966	14.0439	14.1291	12.9812
EIF2S1	P05198	0.00173361	0.00444285	11.4203	11.4901	10.8176	10.5044	12.8628	10.3741
MAPK1	P28482	0.00702867	0.00437387	15.2166	15.4573	15.7987	15.5562	15.2727	15.6569
UBXN1	A0A087WTZ5;E9PJ81;E9PRQ7;Q04323;Q04323-2	0.00654928	0.00295289	14.9916	15.1551	14.8803	15.2379	14.9899	14.808
UBE2M	P61081	0.012846	0.00285435	14.7925	14.6111	14.5512	14.6774	14.6434	14.6426
PPA2	D6R967;H0Y9D8;Q9H2U2;Q9H2U2-2;Q9H2U2-3;Q9H2U2-6	NaN	0	9.49627	9.89355	10.3194	9.90892	9.13132	8.60543
TIMELESS	Q9UNS1;Q9UNS1-2	NaN	0	9.5897	9.48354	9.40305	9.11111	8.3639	9.91225
GTSF1	G3V1V4;Q8WW33	0.000162603	-0.000307083	17.9822	16.2898	17.4841	17.5608	17.6518	16.5427
SERPINB9	P50453	0.00143207	-0.00100136	14.4509	14.7597	14.0431	14.4731	14.5456	14.232
UBE2L6	O14933	0.00156085	-0.00161076	15.8521	16.0589	15.4253	15.5741	16.3313	15.4261
ENY2	E5RHX8;Q9NPA8;Q9NPA8-2	0.00618284	-0.00262515	14.7092	15.1185	14.7724	14.9003	14.7529	14.939
MCM3	P25205	0.0132817	-0.00268173	17.3428	17.3535	17.1905	17.3622	17.2964	17.2201
SEC23B	A0A2R8YFH5;Q15437	0.00659333	-0.00278823	14.6832	14.9459	14.5931	14.5998	14.9063	14.7077
SNRNP200	O75643	0.00950041	-0.00325394	14.8064	14.9271	14.8664	14.6499	14.9523	14.988
CPSF7	Q8N684;Q8N684-3	0.00241597	-0.00444921	16.6564	15.4229	16.9829	15.7325	17.0087	16.3076
TUBA1B	P68363	0.0214593	-0.00516828	19.7241	19.777	19.7464	19.6803	19.6509	19.9008
MGMT	B4DEE8;P16455	0.00171477	-0.00560919	12.2409	10.4394	11.6523	12.3129	12.4164	9.58655
CLUH	A0A494C0R8;K7EIG1;O75153	0.00852521	-0.00619729	14.0402	14.0074	14.1626	13.6261	14.1377	14.4278
SYF2	O95926;O95926-2	0.0128319	-0.0086654	12.2302	12.8801	12.4247	12.6021	12.278	12.6287
MCM4	A0A3B3IT92;A0A3B3IU45;E5RG31;P33991	0.00777314	-0.00901731	11.8935	12.4828	11.4733	11.5322	11.9139	12.3765
ABCE1	D6R9I9;P61221	0.00865561	-0.00978629	12.9203	13.2482	13.0414	13.3024	12.353	13.5251
PPIA	P62937	0.0137293	-0.0100988	18.7974	19.4322	18.8873	19.0029	18.7987	19.2849
FLNA	P21333;P21333-2	0.0301607	-0.0107613	16.6631	16.3338	16.5679	16.4002	16.4929	16.6395
AHCY	P23526	0.0257569	-0.0113061	15.9463	15.9328	15.761	15.8524	16.1093	15.6444
XP32	Q5T750	0.0058149	-0.0126874	16.1771	14.9026	14.4102	15.9373	15.2469	14.2676
RAB21	Q9UL25	0.0410658	-0.0153955	14.2212	14.5635	14.2858	14.2167	14.3397	14.4677
ANXA1	P04083	0.0242292	-0.0159658	16.3786	16.9631	16.3086	16.512	16.4178	16.6726
PIP	P12273	0.00722011	-0.0165243	13.6001	14.6764	13.4701	14.6037	14.4867	12.6065
PARP4	Q9UKK3	0.0290236	-0.0165815	12.7105	12.3945	12.6912	12.8962	12.4985	12.3519
RPIA	P49247	0.0181598	-0.0174999	14.0351	14.1667	13.3599	13.6829	14.2336	13.5926
TUBB4B	P68371	0.0250826	-0.0176748	19.5995	20.2549	19.7392	19.7402	19.702	20.0984
TXNDC12	O95881	0.0170727	-0.0194022	17.1486	16.3102	16.6715	16.9231	17.0324	16.1166
FN3KRP	Q9HA64	0.0207723	-0.0211484	15.9266	16.5276	15.8769	16.1775	15.5885	16.5016
GEMIN2	A0A3B3IU42;G5EA29;H0YCF4;H0YDP6;H0YEL0	0.0116041	-0.0229143	11.5741	13.5338	12.4362	12.4022	11.9859	13.0872
PPP2R1A	P30153	0.145902	-0.0237541	16.023	16.2008	16.1123	16.0807	16.1471	16.0369
RCC2	Q9P258	0.0442965	-0.0250708	19.0733	19.4791	19.1736	19.0333	19.1037	19.5138
CYFIP2	E7EVJ5;Q96F07;Q96F07-2	0.00715195	-0.0251656	12.7027	11.9507	12.2599	12.9685	13.8071	10.0622
ACIN1	S4R3H4	0.0278836	-0.0257298	14.4867	13.8538	14.3186	14.2039	14.6139	13.7641
TXN2	Q99757	0.00699236	-0.0261148	15.9844	13.7683	15.8032	16.2758	16.0367	13.1652
TUBA3C;TUBA3D	P0DPH7;P0DPH8	0.043311	-0.0272214	15.9191	16.4096	16.1417	15.9432	15.996	16.4497
PGAM5	Q96HS1;Q96HS1-2	0.0482081	-0.0275812	14.5604	15.0908	14.5386	14.5701	14.835	14.702
HNRNPK	P61978;P61978-2;P61978-3	0.0620783	-0.0280863	16.0644	16.3485	15.8682	15.9909	15.9954	16.2105
UBE2H	C9JZY6;H7C4M9;P62256;P62256-2	0.0172337	-0.0290696	16.5297	15.0847	16.2391	16.319	16.2123	15.235
EDC4	Q6P2E9	0.0416976	-0.0292867	13.9992	14.5524	14.0078	13.8786	14.1824	14.4104
SFN	P31947;P31947-2	0.0157883	-0.0297953	12.9392	12.0373	13.2895	13.6062	12.704	11.8665
PTBP1	A0A0U1RRM4;P26599;P26599-2;P26599-3	0.0443834	-0.030386	17.77	18.2937	17.9824	17.9624	17.6894	18.3032
PDIA3	P30101	0.0460577	-0.0323025	16.0382	16.4356	16.1184	16.0868	15.8524	16.5562
MTHFD1	F5H2F4;P11586;V9GYY3	0.0990691	-0.0368233	14.9199	14.6175	14.9873	14.8176	14.6784	14.9183
PCMT1	A0A0A0MRJ6;P22061;P22061-2	0.0386412	-0.0371898	15.9335	16.2889	16.0555	16.0987	15.4988	16.5689
SF3B3	Q15393	0.1838	-0.0391223	16.1169	16.1245	16.1724	16.0519	16.2534	15.9911
ABRACL	Q5SZC9;Q9P1F3	0.0301425	-0.0416981	15.1234	16.2071	14.9318	15.3271	14.9861	15.824
MYD88	Q99836;Q99836-6	0.149961	-0.041851	16.4744	16.7147	16.4405	16.3955	16.5131	16.5955
TK1	P04183	0.215166	-0.0426311	17.2537	17.3774	17.3133	17.1426	17.3739	17.3
HSPBP1	Q9NZL4;Q9NZL4-3	0.0606275	-0.0427701	14.3983	13.9064	14.2503	14.0591	14.5164	13.8511
HNRNPF	P52597	0.280822	-0.0433089	17.8285	17.6865	17.8081	17.7383	17.8024	17.6524
TUBB	P07437;Q5JP53	0.0604874	-0.0441202	18.9331	19.6872	19.103	19.0517	19.1297	19.4096
PELO	Q9BRX2	0.086603	-0.0449162	14.0541	13.7123	13.8081	14.0787	13.8135	13.5475
MCTS1	Q9ULC4;Q9ULC4-2;Q9ULC4-3	0.134038	-0.0451635	12.5951	12.5181	12.2583	12.3875	12.3032	12.5453
PYGB	P11216	0.189417	-0.0455408	15.3037	15.3228	15.1537	15.0739	15.3294	15.2403
PCYT1A	C9J050;C9J2E1;C9JEJ2;C9JPY0;C9JVS0;F8WAZ5;P49585	0.0140954	-0.0477282	13.0458	10.4936	11.8308	12.7423	12.4199	10.0647
LGALS7B	P47929	0.015807	-0.0491327	15.0445	15.3402	16.0575	16.8546	15.9015	13.5387
EIF3D	O15371;O15371-2;O15371-3	0.0649125	-0.0496108	14.3691	15.0776	14.2949	14.4772	14.4043	14.7113
C2orf69	Q8N8R5	0.124223	-0.0496521	14.012	14.1207	14.0624	14.0962	14.2122	13.7378
SPAG7	O75391	0.0503166	-0.050155	11.8689	12.1418	11.4339	11.5907	11.403	12.3004
ABCD3	A0A3B3ITW3;P28288;P28288-2	0.0626398	-0.0507485	12.6516	13.1499	12.8789	12.9289	13.2118	12.3875
PRPF6	O94906;O94906-2	0.0474336	-0.0514145	13.0069	13.6013	12.5835	12.7201	12.8622	13.4551
WDR26	A0A499FIZ0;A0A7I2YQL3;A0A7I2YQQ9;A0A7P0SXD0;H0Y9R3;Q9H7D7;Q9H7D7-2	0.0137815	-0.051843	11.4279	11.6397	8.05098	9.88027	9.87416	11.2086
OGFR	Q9NZT2;Q9NZT2-2	0.0558929	-0.0519908	15.0039	14.3605	14.7874	14.8671	14.9787	14.15
TUFM	P49411	0.436647	-0.0522041	16.7822	16.7719	16.7651	16.8025	16.733	16.6271
SERPINA12	Q8IW75	0.0385154	-0.0537052	9.75075	9.65703	8.73434	8.8801	9.09565	10.0053
MKI67	P46013;P46013-2	0.135808	-0.0563806	13.7703	13.9108	13.8258	13.5102	13.8085	14.0191
MIF	P14174	0.0529981	-0.0579325	22.7344	23.6865	22.8091	22.7978	22.8006	23.4578
TYMP	C9JGI3;P19971;P19971-2	0.0456149	-0.0588719	9.96142	9.10541	9.46046	9.00355	10.173	9.17416
IGHG1	A0A0A0MS07;A0A0A0MS08;P01857	0.0158219	-0.0599438	13.7752	12.9042	13.0506	14.7664	14.0155	10.7682
FUBP1	E9PEB5;Q96AE4;Q96AE4-2	0.0826386	-0.0611734	14.2629	15.0205	14.3336	14.5022	14.2923	14.639
SEC24C	G5EA31;P53992	0.110099	-0.061196	13.5469	13.1001	13.5292	13.6025	13.2399	13.1503
RPP30	P78346;P78346-2;Q5VU11	0.294466	-0.0623684	14.4502	14.5365	14.2569	14.3493	14.3935	14.3137
PARG	Q86W56;Q86W56-2;Q86W56-3;Q86W56-4;Q86W56-5	0.0513059	-0.0630029	12.3882	13.5603	12.2474	12.714	12.5305	12.7624
NEDD1	Q8NHV4;Q8NHV4-3	0.0361446	-0.063159	12.3263	13.2943	11.291	12.1143	12.1169	12.4909
FRG1	E9PLY7;E9PRR7;Q14331	0.105464	-0.0633205	14.4731	14.627	13.9933	14.1476	14.2613	14.4946
;VPS4B;FIGNL1;FIGNL1;VPS4A	I3L4J1;O75351;Q6PIW4;Q6PIW4-2;Q9UN37	0.0800153	-0.0637379	14.2012	14.9002	14.1312	14.1411	14.2941	14.6063
HNRNPDL	A0A087WUK2;O14979;O14979-2;O14979-3	0.0185392	-0.0638215	14.4362	12.0324	13.8757	14.0967	14.4311	11.625
BUB1B	O60566;O60566-2;O60566-3	0.163153	-0.0650403	13.3379	13.5941	13.1471	13.3256	13.1511	13.4074
RAB10	P61026	0.0651402	-0.065526	13.5684	12.726	13.7021	13.3935	13.4788	12.9276
PRPF19	Q9UMS4	0.100921	-0.0657117	15.3212	15.733	15.2849	15.0955	15.3206	15.726
EIF4E	D6RBW1;P06730;P06730-2;P06730-3	0.0649573	-0.0674267	14.7703	13.9327	14.6911	14.6845	14.5945	13.9129
BAG2	O95816	0.209109	-0.0675764	13.9059	14.0771	13.9652	13.8639	13.7473	14.1343
USP9X	Q93008;Q93008-3	0.0686707	-0.0679445	13.1377	13.9116	13.8761	13.4768	13.2219	14.023
PDCD2L	Q9BRP1	0.128123	-0.0702788	16.3858	16.9093	16.5351	16.4211	16.4036	16.7946
MVB12A	Q96EY5;Q96EY5-2	0.0663905	-0.0711295	14.4084	15.2364	14.459	14.5579	14.2199	15.1125
TELO2	H3BRS3;Q9Y4R8	0.0618577	-0.0716349	12.2257	11.0595	12.1598	11.4837	11.945	11.8014
IDH3B	A0A087WZN1;O43837	0.322569	-0.0748736	15.6667	15.9079	15.6982	15.5801	15.6878	15.7803
MCMBP	Q9BTE3-2	0.241773	-0.0748851	16.5102	16.6313	16.3631	16.3976	16.2796	16.6028
IQGAP1	P46940	0.291069	-0.0749474	14.2649	14.4838	14.1544	14.3006	14.2058	14.1718
DCTPP1	Q9H773	0.19258	-0.0751956	14.6388	14.7837	14.387	14.4058	14.7145	14.4636
ABCF3	Q9NUQ8;Q9NUQ8-2	0.0667342	-0.07558	14.3016	15.1504	14.2203	14.4548	14.0458	14.9449
ANAPC7	Q9UJX3;Q9UJX3-2	0.0242365	-0.0758588	11.097	10.5079	9.14043	11.304	10.7563	8.45737
PRPF38A	Q8NAV1	0.120976	-0.0759916	13.9289	13.2096	13.7254	13.3965	13.5607	13.6788
NUDC	Q9Y266	0.122571	-0.0774924	15.4853	15.9694	15.7218	15.4364	15.4932	16.0143
DSTN	P60981	0.214065	-0.078076	16.954	17.2595	16.8805	16.7913	17.0458	17.0226
SRXN1	Q9BYN0	0.240639	-0.0815926	15.5977	15.4442	15.5217	15.372	15.6839	15.2629
GART	P22102	0.260599	-0.0817572	18.3894	18.6804	18.4448	18.3308	18.3403	18.5982
EXOSC3	Q9NQT5;Q9NQT5-2	0.1461	-0.0818892	14.0897	14.5065	14.5517	14.4129	14.0082	14.4811
AURKA	O14965	0.209522	-0.0823145	13.8819	14.0426	13.9145	13.8578	13.6177	14.1166
PFDN1	E5RGS4;O60925	0.143626	-0.0823367	14.5586	15.0434	14.6166	14.3968	14.6658	14.909
KHDRBS1	Q07666;Q07666-2;Q07666-3	0.0744794	-0.0831629	14.1519	14.7334	14.4447	14.0109	14.0008	15.0689
SNRPGP15;SNRPG;SNRPG;SNRPG	A8MWD9;F5H013;P62308;Q49AN9	0.0960841	-0.0835203	17.8948	18.5606	18.0601	17.9015	17.8026	18.5608
IAH1	Q2TAA2	0.211324	-0.0837291	15.9458	16.1632	16.119	15.9262	15.7923	16.2584
IPO7	O95373	0.363983	-0.0838916	13.4851	13.7892	13.7504	13.6077	13.5955	13.5698
PPP2R5D	E9PFR3;H0Y8C4;H7C5Q9;Q14738;Q14738-2;Q14738-3	0.0518538	-0.0840057	12.7602	13.9364	13.43	12.5926	13.1753	14.1067
SP100;SP100;SP140L;SP100;SP100;SP100;SP100;SP100;SP100;SP100;SP140L;SP140L;SP140L;SP140L	C9JBL0;E9PHV6;H7BYP4;P23497;P23497-2;P23497-3;P23497-4;P23497-5;P23497-6;P23497-7;Q9H930;Q9H930-1;Q9H930-2;U5Y3L1	0.0218073	-0.084116	11.1317	9.16645	12.7274	11.1334	12.1447	9.49498
RBIS	A0A087WWE7;Q8N0T1	0.131661	-0.0841586	13.7123	14.2624	13.7604	13.9624	13.5164	14.0038
AP3D1	A0A2R8Y611;O14617;O14617-2;O14617-3;O14617-4;O14617-5	0.224259	-0.0874904	10.8564	11.1964	11.0927	10.7324	11.0654	11.0852
PCID2	Q5JVF3;Q5JVF3-2;Q5JVF3-3;Q5JVF3-4	0.0571008	-0.0878248	12.1185	11.6981	12.1814	11.0791	12.8367	11.8187
;PSMA1;PSMA1	B4DEV8;P25786;P25786-2	0.160372	-0.0881195	12.9443	13.2817	13.2459	13.0692	13.3746	12.7637
SPR	P35270	0.175979	-0.0884873	13.4577	13.0343	13.2227	13.038	13.4397	12.9716
BAIAP2	B4DWA1;I3L4C2;Q9UQB8;Q9UQB8-2;Q9UQB8-3;Q9UQB8-4;Q9UQB8-5;Q9UQB8-6	0.0423687	-0.0894289	12.4402	13.3172	11.8431	11.836	13.5996	11.8966
HLTF	A0A0C4DGA6;H7C5K0;Q14527;Q14527-2	0.0873952	-0.0899477	9.78896	8.88983	9.62472	9.64186	9.5203	8.87151
MCM7	P33993;P33993-3	0.295657	-0.0899671	14.882	15.0595	14.9506	14.6996	14.8396	15.083
FAM118A	B0QY29;Q9NWS6	0.0190159	-0.0901728	11.4797	9.57792	11.0627	12.2384	11.9256	7.68576
ATXN2L	H3BUF6;Q8WWM7;Q8WWM7-2;Q8WWM7-3;Q8WWM7-4;Q8WWM7-5;Q8WWM7-6;Q8WWM7-8;Q8WWM7-9	0.166445	-0.0904617	14.3743	14.6654	14.2627	14.3571	14.0496	14.6243
SUGT1	Q9Y2Z0;Q9Y2Z0-2	0.159921	-0.0906051	13.458	13.7261	13.0902	13.423	13.123	13.4564
RNPEP	A6NKB8;Q9H4A4	0.260843	-0.0915798	15.1526	15.5017	15.1926	15.1362	15.0765	15.3594
DCUN1D5	E9PM04;Q9BTE7	0.109451	-0.0916872	13.6539	13.8417	13.8239	14.2147	13.6415	13.1883
ILF2	B4DY09;Q12905	0.343084	-0.0917352	16.8019	17.0967	16.7509	16.7663	16.7661	16.8419
DSN1	Q5JW54;Q9H410;Q9H410-2;Q9H410-3;Q9H410-4	0.0984041	-0.0923805	9.47564	8.95645	9.98261	9.43953	9.07764	9.62038
UBAP1	Q9NZ09;Q9NZ09-2;Q9NZ09-4	0.0888897	-0.0939496	13.2546	13.343	13.2211	12.7516	12.8609	13.9244
HNRNPA1	A0A7I2V3R8;F8W6I7;P09651;P09651-2;P09651-3	0.051307	-0.0943778	15.753	13.7515	14.4185	14.2638	15.0055	14.3704
ADSS2	P30520	0.0725218	-0.0946623	14.6217	15.5977	14.6198	14.5568	14.5045	15.4939
PDCD6IP	Q8WUM4	0.109536	-0.0952396	13.9262	13.4635	13.732	13.711	14.0476	13.0775
LORICRIN	P23490	0.0461176	-0.0954879	15.3051	14.3428	14.0216	15.0669	15.0431	13.2731
UEVLD	Q8IX04;Q8IX04-2;Q8IX04-3;Q8IX04-4;Q8IX04-6	0.0734106	-0.0956535	12.1802	11.3063	11.9741	11.0115	11.8889	12.2732
ETHE1	O95571	0.157451	-0.0981134	15.4545	15.7298	15.3976	15.4274	15.0668	15.7933
WFDC12	Q8WWY7	0.0515242	-0.0982952	13.7171	14.745	13.6848	14.6785	14.3145	12.8589
HSP90AA1	P07900;P07900-2	0.230082	-0.0998707	15.0185	14.5891	14.7541	14.4766	14.7115	14.874
KIF2C	Q99661;Q99661-2	0.176956	-0.101051	15.2814	15.8616	15.3504	15.287	15.2742	15.629
OPA1	E5KLJ9;O60313-10;O60313-2;O60313-9	0.408168	-0.101346	16.7715	17.0119	16.7413	16.6981	16.6613	16.8612
ELP1	A0A6Q8PEX6;A0A6Q8PF66;A0A6Q8PFB7;A0A6Q8PFH9;A0A6Q8PG86;A0A6Q8PGW3;A0A6Q8PHC9;A0A6Q8PHF4;F5H2T0;O95163	0.0455904	-0.101576	13.3802	12.009	12.7436	13.1829	13.3339	11.3112
PEF1	Q9UBV8	0.059044	-0.102695	17.9989	16.2975	17.5371	17.4479	17.547	16.5305
DHX36	Q9H2U1;Q9H2U1-2;Q9H2U1-3	0.041479	-0.102786	13.2506	11.3124	12.9061	13.0453	12.9186	11.1969
FASN	P49327	0.299611	-0.103038	19.3711	19.7532	19.3928	19.291	19.4027	19.5142
MDN1	Q5T795;Q9NU22	0.128599	-0.104495	11.2018	11.9685	11.1741	11.0529	11.4993	11.4788
CARM1	Q86X55;Q86X55-1	0.154082	-0.104548	15.8638	16.5571	15.8465	15.8066	16.1435	16.0037
HCFC1	A6NEM2;P51610;P51610-2;P51610-4	0.16807	-0.104849	14.8808	15.4099	14.9336	14.7977	14.813	15.2991
SLC25A6	P12236	0.243661	-0.105506	18.4159	18.0011	18.3302	17.9319	18.3278	18.171
RRM1	P23921	0.331253	-0.106473	16.1666	15.7856	16.1565	15.9809	15.9633	15.8451
COX17	Q14061	0.0409699	-0.107933	16.8955	16.348	15.174	15.0737	17.4846	15.5354
RAB14	P61106	0.141609	-0.108249	14.6136	14.1207	14.3289	14.3728	14.5919	13.7736
CSNK2A1;CSNK2A1;CSNK2A1;CSNK2A1;CSNK2A3	A0A2R8YD58;A0A2R8YF43;E7EU96;P68400;Q8NEV1	0.145174	-0.108332	14.7995	15.4523	14.9195	14.8282	14.6947	15.3235
INTS11	A0A087WYI0;C9IYS7;C9J979;Q5TA45;Q5TA45-2;Q5TA45-3;Q5TA45-4;Q5TA45-5	0.129704	-0.108356	14.4754	14.758	14.8293	14.8781	14.005	14.8546
ANLN	Q9NQW6;Q9NQW6-2	0.137094	-0.108483	13.3838	13.3251	12.8349	13.4991	13.03	12.6892
GDI2	P50395	0.0314353	-0.108743	13.816	11.1785	14.0264	14.3398	12.2053	12.1495
TRUB1	Q8WWH5	0.0333792	-0.108926	11.1443	10.0597	12.0041	10.5925	9.53424	12.7546
ALDH9A1	P49189;P49189-3	0.051933	-0.113022	12.3501	10.9232	12.1977	12.5264	12.0564	10.5492
IL18	Q14116;Q14116-2	0.105803	-0.114408	12.2843	13.0575	13.2171	12.2894	12.7268	13.1994
PTER	Q96BW5;Q96BW5-2	0.265315	-0.116039	15.1024	14.8936	15.2765	15.179	15.0261	14.7194
PTPN12	C9J1X8;F8WB51;Q05209;Q05209-2;Q05209-3	0.0342229	-0.116169	10.6064	8.64626	7.62426	9.96347	7.4395	9.12545
PSMC1	P62191;P62191-2	0.178113	-0.116954	13.2478	13.9699	13.266	13.3722	13.5111	13.2495
UBR7	E9PCJ7;G3V336;Q8N806	0.250273	-0.120384	14.5459	14.9653	14.6172	14.4294	14.47	14.8678
ATG4B	Q9Y4P1;Q9Y4P1-2;Q9Y4P1-6	0.223801	-0.120976	14.6897	15.0943	14.5092	14.4217	14.8385	14.6701
PCBP2	Q15366;Q15366-2;Q15366-3;Q15366-6	0.363905	-0.122082	18.6464	18.9657	18.7319	18.5526	18.5608	18.8642
RIPK1	Q13546	0.356486	-0.122203	13.8631	14.1171	13.7434	13.9224	13.6141	13.8205
TMOD3	H0YKU1;H0YNJ8;Q9NYL9	0.0948948	-0.122905	10.6129	9.85817	9.72689	10.6861	9.5665	9.57671
HSPB1	A0A6Q8PFK8;P04792	0.219379	-0.125793	16.1652	16.5789	16.0455	16.4441	16.0128	15.9554
TXNDC17	Q9BRA2	0.56982	-0.127973	16.2128	16.3478	16.1644	16.279	16.0509	16.0112
CIBAR1;CIBAR1;FAM92A;FAM92A;FAM92A;FAM92A;FAM92A;CIBAR1;CIBAR1;CIBAR1;CIBAR1	A0A087WTS3;A0A0B4J212;A1XBS5;A1XBS5-2;A1XBS5-3;A1XBS5-4;A1XBS5-5;E5RGD0;E5RHK0;F8W7P5;H0YC32	0.0920725	-0.129397	12.7149	13.3965	13.0889	13.3981	13.398	12.016
ALYREF	Q86V81	0.0596941	-0.130785	16.4701	14.5434	14.0225	14.8018	15.1693	14.6725
IDE	A0A3B3ISG5;A0A7I2V2P6;A0A7I2V3E3;A0A7I2V610;P14735	0.0910845	-0.131437	14.3963	13.1741	14.0436	14.1988	13.9995	13.0214
DARS1	P14868;P14868-2	0.165611	-0.131675	14.6703	14.5364	14.6877	13.9197	14.6902	14.8895
DNAJC10	A0A7P0TAQ9;Q8IXB1	0.198502	-0.132043	17.3579	17.983	17.5636	17.3608	17.2911	17.8565
USP15	Q9Y4E8;Q9Y4E8-2;Q9Y4E8-3	0.36336	-0.132129	13.8266	13.4432	13.6358	13.3494	13.4587	13.701
HSPD1	P10809	0.32199	-0.13276	17.4927	17.8001	17.4149	17.3385	17.2926	17.6782
CHD4	A0A0C4DGG9;A0A2R8Y212;A0A2R8Y425;A0A2R8Y4X2;A0A2R8Y521;A0A2R8Y5J0;A0A2R8YD40;A0A2R8YDJ9;A0A2R8YDW2;A0A2R8YFD8;A0A2R8YFK9;A0A2U3TZM0;F5GWX5;Q14839;Q14839-2	0.139315	-0.132878	13.606	13.3972	13.0283	12.9722	13.8254	12.8352
EEF1A2	A0A2U3TZH3;Q05639	0.120942	-0.134349	17.2518	18.3057	17.4138	17.3615	17.2145	17.9923
CORO1C	B4E3S0;Q9ULV4;Q9ULV4-2;Q9ULV4-3	0.0980856	-0.135658	13.1472	14.2526	13.5218	12.9255	13.3835	14.2056
CSNK1D	H7BYT1;P48730;P48730-2	0.272291	-0.135682	12.6217	12.1964	11.9655	12.0209	12.2036	12.1521
HSP90AB1	P08238	0.534402	-0.136859	17.2793	17.4118	17.3032	16.9843	17.3094	17.2901
TOMM22	Q9NS69	0.0474885	-0.136971	12.8304	10.6807	12.9661	12.3158	12.9792	10.7712
CAPZA1	P52907	0.237419	-0.138089	17.2291	17.9038	17.3558	17.3444	17.1963	17.5337
HNRNPR	O43390;O43390-2	0.320258	-0.138238	14.7971	14.5855	14.6606	14.291	14.8555	14.482
RPS27A	P62979	0.0735987	-0.138516	16.183	16.911	16.1359	16.7439	15.0594	17.0109
HNRNPC	B2R5W2;B4DY08;G3V2Q1;G3V4C1;G3V4W0;P07910;P07910-2	0.332718	-0.139339	18.2208	18.2441	18.2971	17.8345	18.0843	18.425
LAP3	P28838;P28838-2	0.138679	-0.141563	12.356	11.1664	11.9667	11.9508	11.6447	11.4689
NUP98	P52948;P52948-2;P52948-5	0.188206	-0.141872	11.902	11.1931	12.1309	11.6119	11.4942	11.6943
SLC4A5	A0A1B0GVY3	0.0821158	-0.143482	19.2575	20.0904	19.4593	19.5779	18.4272	20.3718
ANXA13	E5RIN3;P27216;P27216-2	0.108392	-0.143747	19.2948	20.6596	19.5006	19.5631	19.3588	20.102
LRPPRC	A0A804HHY9;A0A804HI40;A0A804HIG4;A0A804HIN4;A0A804HIQ7;A0A804HJZ1;A0A804HK30;A0A804HKI2;A0A804HKR3;A0A804HL40;A0A804HLG8;P42704	0.201827	-0.145479	14.9871	15.1577	14.734	14.5357	14.5954	15.3113
GFPT1	A0A6I8PTT9;Q06210;Q06210-2	0.590748	-0.145781	13.3759	13.4676	13.4114	13.4384	13.3066	13.0726
ADAT2	Q7Z6V5;Q7Z6V5-2	0.0540203	-0.145922	12.7007	9.64205	11.6639	11.2271	11.5943	10.7475
PSME3	P61289;P61289-2;P61289-3	0.317764	-0.14634	14.507	14.8434	14.4744	14.2573	14.3809	14.7474
CAD	F8VPD4;P27708	0.304294	-0.146772	17.149	17.6119	17.1403	16.9666	17.1184	17.3759
MATR3	A0A0R4J2E8;A8MXP9;P43243	0.396238	-0.147699	14.6086	14.8947	14.643	14.3443	14.567	14.7918
;TUBB3	A0A0B4J269;Q13509	0.103084	-0.147706	13.9585	14.2306	13.0475	13.1893	13.2653	14.3389
CHKA	P35790;P35790-2	0.0930878	-0.147843	13.4517	14.5097	13.4952	13.2999	13.1482	14.5649
GNAI2;GNAI2;GNAI2;GNAI2;GNAI2;GNAI3;GNAI1;GNAI1	P04899;P04899-2;P04899-3;P04899-5;P04899-6;P08754;P63096;P63096-2	0.0448505	-0.151652	11.6132	8.34057	11.3784	11.061	10.3846	9.43151
LRRC40	Q9H9A6	0.175444	-0.151905	14.4509	15.4303	14.6387	14.5316	14.5796	14.953
CHMP1A	A0A6Q8PF35;F5H875;F8VUA2;Q9HD42	0.122168	-0.152158	15.3714	16.3467	15.403	15.2058	15.258	16.2008
NCAPD2	Q15021	0.209126	-0.153734	16.934	17.4289	16.7221	16.6016	17.247	16.7751
TRAPPC3	A0A087WWM0;A6NKE1;O43617;O43617-2	0.299273	-0.153946	14.2753	14.8638	14.7097	14.48	14.2597	14.6472
DCTD	P32321;P32321-2	0.219396	-0.154718	13.2434	13.6763	13.3021	12.9566	13.0756	13.7255
ENO1	A0A2R8Y6G6;P06733	0.235697	-0.155003	13.7004	14.0455	13.6467	13.8466	13.8905	13.1905
WRNIP1	Q96S55;Q96S55-2	0.176127	-0.155022	11.5477	10.6274	10.5034	10.6471	10.8369	10.7294
ACTG1	I3L4N8;P63261	0.469692	-0.155303	19.1702	19.558	19.2996	19.0362	19.1893	19.3364
CPNE7	Q9UBL6;Q9UBL6-2	0.340391	-0.155375	16.317	16.8034	16.4769	16.2755	16.2336	16.622
MSL1	J3KSZ8;J3QQY0;Q68DK7	0.127206	-0.156532	11.8735	10.7617	11.9118	10.8695	11.5402	11.6676
ERCC6L	B5MDQ0;Q2NKX8	0.0720302	-0.157206	10.4353	9.82477	9.68647	10.2817	10.7963	8.39691
NUP85	F5H0W7;J3KT10;J3QL54;J3QL91;J3QLH0;J3QS63;Q9BW27;Q9BW27-2;Q9BW27-3	0.197738	-0.159396	13.6364	14.1997	13.6408	13.3587	13.4847	14.1553
MTHFD1L	A0A087WVM4;B7ZM99	0.784802	-0.159473	17.1299	17.3631	17.1744	17.0605	16.9592	17.1693
KHNYN	O15037	0.0445255	-0.160135	11.3774	8.395	10.9031	10.7502	10.9892	8.45565
GDA	Q9Y2T3;Q9Y2T3-3	0.245308	-0.160177	15.1369	15.6297	15.0898	14.8752	14.9984	15.5023
ISOC1	Q96CN7	0.275514	-0.160191	16.155	16.6994	16.278	16.0054	16.5429	16.1035
TEX10	Q9NXF1;Q9NXF1-2	0.0722615	-0.160324	10.7602	10.1495	10.503	10.449	11.5473	8.93538
PTPMT1	E9PQM0;Q8WUK0;Q8WUK0-2;Q8WUK0-3	0.137113	-0.161276	13.1641	11.8681	12.7918	12.5101	12.7582	12.0718
HDAC1	Q13547	0.182375	-0.161448	12.8948	12.6788	12.2068	12.5311	12.8407	11.9243
PDP1	Q9P0J1;Q9P0J1-2	0.376565	-0.161588	14.0381	14.1634	13.7358	13.6701	13.7105	14.0719
PFKL	P17858	0.122562	-0.161842	12.461	13.2969	12.8894	13.4557	12.6968	12.0093
ESRP2	Q9H6T0;Q9H6T0-2	0.633481	-0.162289	14.0466	14.2444	13.9074	14.0264	13.8493	13.8358
NME2;NME1-NME2	P22392-2;Q32Q12	0.805055	-0.163293	18.2677	18.28	17.9943	18.0192	17.9994	18.0335
HPRT1	P00492	0.129585	-0.164034	15.085	15.7896	14.9667	14.8967	15.8699	14.5826
TMX1	Q9H3N1	0.0884272	-0.164826	13.6231	11.793	13.3848	12.6122	13.4025	12.2917
USP10	Q14694;Q14694-2;Q14694-3	0.881694	-0.165647	14.0632	14.175	14.0167	13.7926	14.0483	13.9171
SMN1;SMN1;SMN2;SMN1;SMN1;SMN2;SMN2;SMN2;SMN2;SMN2	A0A0G2JRX5;A0A0G2JRY6;A0A1W2PRV5;B4DP61;E7EQZ4;H0YBZ9;Q16637;Q16637-2;Q16637-3;Q16637-4	0.0981556	-0.167105	14.4889	15.8047	14.5263	14.4285	14.2622	15.628
HNRNPA2B1	A0A7I2V323;A0A7I2V3P1;A0A7I2V3P7;A0A7I2V4I6;A0A7I2V4N1;A0A7I2V4S4;P22626;P22626-2	0.0752792	-0.168616	16.2104	13.8856	15.7937	15.574	15.3207	14.4891
RBM14	Q96PK6	0.243683	-0.169409	14.1738	13.6327	13.7118	13.3065	13.6478	14.0558
PSMA4	H0YL69;H0YMZ1;H0YN18;P25789	0.152973	-0.171547	13.398	12.6221	12.7046	12.9835	13.1601	12.0664
GGA2	H3BMM6;H3BMN6;I3L2C4;Q9UJY4	0.188651	-0.172056	12.9897	13.3814	13.4837	13.5314	12.4967	13.3106
ECPAS	A0A804HJA4;J3KN16;Q5VYK3	0.12441	-0.172352	20.3872	20.9705	20.2459	19.9478	19.8663	21.2724
CYRIB	Q9NUQ9	0.127744	-0.17244	13.6783	13.526	13.0045	13.2575	13.998	12.436
PNPLA6	A0A384DVU0;Q8IY17;Q8IY17-2;Q8IY17-3;Q8IY17-5	0.261236	-0.173134	12.4231	12.1934	11.7103	11.8349	11.723	12.2496
SET;SETSIP;SET;SET;SET;SET	A0A0C4DFV9;P0DME0;Q01105;Q01105-2;Q01105-3;Q01105-4	0.0433642	-0.173441	12.4875	11.6977	9.99737	10.6687	13.4297	9.56384
TOLLIP	E7EN89;E9PP67;E9PQ25;F2Z2Y8;Q9H0E2;Q9H0E2-2	0.104919	-0.174375	10.7457	10.319	10.4099	11.2965	10.3806	9.27433
ECM1	Q16610;Q16610-2;Q16610-4	0.107264	-0.174918	12.9375	12.0473	12.5806	13.4037	11.8537	11.7832
TPM3	P06753-2	0.328552	-0.177132	16.7926	17.4514	16.7828	16.7999	16.8523	16.8432
DCAF13	A0A087WT20;A0A087X1F8;Q9NV06	0.303299	-0.178207	12.2168	11.4085	11.9537	11.6586	11.7256	11.6602
TXNDC5	Q8NBS9	0.553667	-0.179778	18.7299	18.9797	18.7695	18.5299	18.521	18.8889
G6PD	P11413;P11413-2;P11413-3	0.593919	-0.181897	14.4461	14.1385	14.3257	14.0777	14.3189	13.9681
PDS5A	Q29RF7	0.516421	-0.182479	13.9433	14.0044	13.784	13.5333	13.6503	14.0008
PSMD2	Q13200	0.17085	-0.182509	13.8538	12.7923	13.8218	13.1399	13.7125	13.068
SREK1	Q8WXA9-2	0.210367	-0.183325	13.4151	12.3134	12.9166	12.764	12.4796	12.8515
SPTLC2	O15270	0.146475	-0.184683	12.8638	14.2848	13.4511	13.2622	13.0125	13.771
CUTA	C9IZG4;O60888;O60888-2;O60888-3	0.0575914	-0.184864	9.91613	12.1203	11.7227	11.9241	11.9694	9.31101
HSD17B12	A0A1B0GV93;Q53GQ0	0.286681	-0.18529	11.8054	12.3088	12.0441	11.4376	12.0357	12.1291
NARF	E7EP87;Q9UHQ1;Q9UHQ1-3;Q9UHQ1-4	0.223909	-0.185953	13.2852	13.9091	13.5968	13.4471	12.9268	13.8593
NOP9	A0A3B3ISH6;Q86U38;Q86U38-2	0.314739	-0.18664	11.7671	12.4992	12.1403	12.0789	11.7114	12.0564
ERP44	Q9BS26	0.940567	-0.187922	15.3297	15.3442	15.0882	15.0482	15.0025	15.1476
VRK2	Q86Y07;Q86Y07-2;Q86Y07-3;Q86Y07-4;Q86Y07-5	0.234815	-0.188759	15.6107	16.4729	15.8227	15.5331	15.6758	16.1311
HACD3	Q9P035	0.0739259	-0.18902	12.5422	11.1742	12.1899	12.055	13.004	10.2802
USP4	Q13107;Q13107-2	0.184785	-0.189344	12.2886	13.0747	11.8896	12.2524	11.9089	12.5235
PRDX2	P32119	0.32259	-0.189903	15.3346	16.132	15.6325	15.3845	15.5414	15.6035
DCP1A	Q9NPI6;Q9NPI6-2	0.196729	-0.189943	12.7087	13.486	13.1067	13.1946	12.3196	13.2175
FLII	Q13045;Q13045-2	0.251432	-0.190398	12.3848	12.869	11.8426	12.12	12.1348	12.2703
TRIP12	A0A6Q8PGG9;A0A6Q8PHK0;Q14669;Q14669-2;Q14669-3	0.798944	-0.192684	14.9257	14.9055	14.9913	14.5972	14.6888	14.9584
NONO	A0A7I2V4J2;A0A7I2V535;A0A7I2V5Y7;Q15233	0.167054	-0.195408	14.1177	13.5432	13.2445	13.8104	13.7872	12.7217
SNRPF	P62306	0.37369	-0.196954	15.6158	16.1031	15.6225	15.6314	15.3015	15.8176
PTGES3	A0A087WYT3;Q15185;Q15185-4	0.465128	-0.197591	17.4239	16.9744	17.2104	17.1035	17.1647	16.7478
HSP90B1	A0A087WT78;A0A7P0T823;A0A7P0T917;A0A7P0TAE1;A0A7P0TAT8;H0YIV0;P14625	0.192837	-0.198051	13.2334	13.7656	13.1066	12.6091	13.1246	13.7777
IRAK1	D3YTB5;H7C224;H7C2I6;P51617;P51617-2;P51617-3;P51617-4	0.330435	-0.198266	12.742	13.0704	12.3956	12.3916	12.8416	12.38
ACSF3	A0A3B3ISK9;Q4G176	0.280157	-0.200479	13.1766	12.7237	13.1244	12.7282	12.4203	13.2748
NUDT21	O43809	0.0794822	-0.200816	12.0684	11.6777	12.1578	12.538	12.7498	10.0137
ANP32A	H0YN26;P39687	0.0344364	-0.20122	14.1166	10.4026	13.3271	13.9837	14.0854	9.1736
ELP2	Q6IA86;Q6IA86-2;Q6IA86-3;Q6IA86-4;Q6IA86-5;Q6IA86-6;Q6IA86-7	0.0577348	-0.201285	13.0006	10.7569	9.46648	11.4925	11.4996	9.62794
NFKB2	Q00653;Q00653-4	0.214566	-0.201744	13.4033	14.1939	13.3495	13.5727	12.9782	13.7906
RUVBL1	Q9Y265	0.211032	-0.20176	14.718	15.6121	15.1258	14.536	14.8689	15.4456
ZC3HAV1L	Q96H79	0.288513	-0.204015	15.3232	15.935	15.5996	15.3839	15.0432	15.8185
ARGLU1	Q9NWB6	0.132157	-0.204243	16.4287	16.4467	16.4731	16.6897	16.9295	15.1167
RAN	B5MDF5;F5H018;J3KQE5;P62826	0.58339	-0.204954	13.8339	14.2259	14.03	13.6543	13.7945	14.0261
UBA1	P22314;P22314-2	0.332042	-0.205791	14.4148	15.0549	14.5051	14.2963	14.2911	14.7701
CHEK1	O14757	0.334466	-0.206621	15.5279	15.8664	15.3936	15.4239	15.0052	15.7389
UNG	F5GYA2;P13051;P13051-2	0.145138	-0.210454	12.8068	11.6073	13.1964	11.9248	12.779	12.2753
FHL2	Q14192	0.179723	-0.210486	14.0572	14.8202	14.1331	14.5673	13.3839	14.4279
ALDH16A1	Q8IZ83;Q8IZ83-2;Q8IZ83-3	0.136718	-0.210858	12.157	12.6096	11.4762	11.9175	11.0429	12.6498
DYNC1H1	A0A2R8Y5T0;A0A7P0T9C4;A0A7P0TA13;Q14204	0.537363	-0.211546	14.1526	14.2079	14.2722	13.6809	14.0543	14.2628
SEC24A	O95486	0.231775	-0.211573	13.0532	12.462	13.0886	13.0953	12.778	12.0957
MRGBP	Q9NV56	0.313753	-0.211628	14.082	14.9517	14.4086	14.2988	14.0688	14.4398
HUWE1	Q7Z6Z7;Q7Z6Z7-2;Q7Z6Z7-3	0.167923	-0.212573	11.8175	13.0137	12.205	12.0842	11.6001	12.7141
OLA1	J3KQ32;Q9NTK5	0.571877	-0.213133	14.6428	14.5936	14.7421	14.7605	14.2372	14.3413
MRPS7	J3KSI8;J3QKW2;J3QLS3;J3QQS1;Q9Y2R9	0.0958353	-0.213814	12.4512	9.74265	11.3881	11.0084	11.1833	10.7488
SRSF5	Q13243;Q13243-3	0.166794	-0.213906	12.9443	12.2664	12.4809	12.4002	13.0861	11.5636
HSDL2	Q6YN16	0.330514	-0.214255	13.4804	13.9118	13.7761	13.1595	13.4114	13.9546
GRB2	P62993	0.351151	-0.214289	15.4991	15.0957	15.2733	15.0736	15.4655	14.6861
DDX6	P26196	0.413578	-0.214327	13.3433	13.1994	13.3589	12.7844	13.501	12.9732
OSBPL8	F8VQX7;F8VUA7;Q9BZF1;Q9BZF1-2;Q9BZF1-3	0.164602	-0.215806	13.5863	14.4429	13.9056	13.0814	13.6606	14.5454
VBP1	P61758;P61758-2	0.37602	-0.216003	14.0105	14.5893	14.0964	13.8177	14.3324	13.8981
MAT2A	P31153	1.44756	-0.21656	18.1466	18.0628	18.0986	17.7601	17.9203	17.9779
EIF3I	A0A7I2V2M3;A0A7I2V3K6;A0A7I2V3N2;A0A7I2V4S8;A0A7I2V607;A0A7I2V613;A0A7I2V640;A0A7I2V685;A0A7I2YQF8;A0A7I2YQI2;A0A7I2YQI6;A0A7I2YQU2;A0A7P0MRT9;Q13347;Q5TFK1	0.0867989	-0.216937	14.0768	13.21	12.9735	13.9046	14.1387	11.5662
TRIM65	Q6PJ69	0.274331	-0.21944	14.6909	15.4995	14.6854	14.4087	14.8168	14.9921
SMARCC2	F8VXC8;Q8TAQ2;Q8TAQ2-2;Q8TAQ2-3	0.308726	-0.22026	12.7818	13.2567	12.7547	12.4369	12.5042	13.1913
CIAO2B	Q9Y3D0	0.490875	-0.220448	13.3369	13.8678	13.6179	13.1955	13.6124	13.3534
STAU1	O95793;O95793-2;O95793-3;Q5JW30	0.103663	-0.221054	12.7901	10.8616	12.3408	11.9573	12.5374	10.8347
HSPH1	Q92598;Q92598-2;Q92598-3	0.599261	-0.221135	14.977	15.24	14.9584	14.65	14.7558	15.1062
PRKDC	P78527;P78527-2	0.737236	-0.222322	14.6739	14.873	14.7003	14.2803	14.661	14.6389
PSMA3	P25788;P25788-2	0.129977	-0.222809	13.6506	13.3063	13.0613	13.1528	12.0491	14.1478
HNRNPU	A0A1W2PPS1;Q00839;Q00839-2	0.625267	-0.223423	17.5507	17.7548	17.6371	17.1661	17.4221	17.684
SEC16A	A0A3F2YNX0;A0A3F2YNZ0;F1T0I1;O15027;O15027-2;O15027-3;O15027-4;O15027-5	0.717175	-0.224079	14.521	14.8175	14.3509	14.2633	14.4108	14.343
TPI1	P60174;P60174-3	0.140085	-0.224497	12.1726	12.4664	12.5795	12.7761	12.7483	11.0206
DUT	H0YKC5;H0YNW5;P33316;P33316-2	0.347446	-0.224565	16.3132	15.9193	16.2465	16.3074	16.008	15.4898
QSOX2	Q6ZRP7	0.270047	-0.22593	13.6523	14.2469	13.9383	13.7892	14.1797	13.1907
RPN2	P04844;P04844-2	0.286647	-0.226023	14.4493	14.0162	14.3737	14.2036	14.4621	13.4955
EIF5B	A0A087WUT6;O60841	0.0906348	-0.226096	11.3076	10.8369	10.1702	10.1867	12.1192	9.33054
YEATS4	F8W0J4;F8W1B9;O95619	0.446749	-0.226293	14.222	14.666	13.9621	14.2012	13.979	13.991
METAP1D	Q6UB28	0.810941	-0.226924	13.2869	13.5277	13.3605	13.0549	13.0584	13.381
MAP2K3	P46734;P46734-3	0.559072	-0.227105	14.3975	14.3664	14.0988	14.3071	14.0945	13.7797
KPNB1	Q14974	0.75528	-0.228744	15.6141	15.8618	15.6133	15.2708	15.4737	15.6585
USP7	A0A669KBL1;H3BND8;Q93009;Q93009-3	0.518984	-0.231912	11.6176	11.9303	11.6184	11.4075	11.2525	11.8106
CSNK2B	P67870;Q5SRQ6	0.589805	-0.232342	12.6137	12.3379	12.4711	11.9444	12.477	12.3044
NUBP2	Q9Y5Y2	0.233998	-0.232371	15.7583	16.6635	15.9394	15.6824	15.5489	16.4328
DPH2	E9PLL2;E9PMH7;Q9BQC3;Q9BQC3-2	0.488061	-0.232773	11.4961	10.8897	11.1849	10.7345	11.0806	11.0572
SRP68	Q9UHB9;Q9UHB9-4	0.184672	-0.23433	12.2677	13.5322	12.5271	11.9743	12.6994	12.9502
FLYWCH2	I3L1Y9;Q96CP2	0.243606	-0.238037	14.1805	14.0484	13.601	13.0294	14.1519	13.9345
BID	P55957;P55957-2	0.234427	-0.239107	14.7537	15.3553	14.4484	14.5558	15.1582	14.126
ATP6V1A	P38606;P38606-2	0.565648	-0.239196	13.1299	12.8188	12.6901	12.3756	12.7263	12.8193
MSH2	P43246	0.524913	-0.241979	14.0823	14.5221	14.3759	13.9239	13.9334	14.397
GRSF1	F5H5I6;H0Y8R1;H0YAK1;Q12849;Q12849-5	0.331059	-0.242791	13.536	13.8206	13.4131	13.0419	13.0995	13.9
MAP1S	Q66K74;Q66K74-2	0.340611	-0.243293	11.948	12.5149	12.35	11.7186	11.8581	12.5064
CPSF3	G5E9W3;Q9UKF6	0.911557	-0.243338	14.3453	14.575	14.2859	14.0725	14.0689	14.3349
CLTC	A0A087WVQ6;Q00610;Q00610-2	1.11364	-0.243972	16.703	16.7266	16.6697	16.3088	16.4076	16.651
HSPA14	Q0VDF9	0.257927	-0.244207	12.2686	13.4057	12.5149	12.2578	12.7697	12.4291
MCM5	P33992	1.34024	-0.244725	16.4026	16.3191	16.3499	15.949	16.2025	16.1859
DNMT1	A0A7I2V490;A0A7I2V5D0;A0A7I2V5F1;A0A7I2YQA8;A0A7I2YQQ0;P26358;P26358-2	0.809031	-0.245475	14.2059	14.1242	14.0636	13.6349	14.0937	13.9288
TAGLN2	P37802;P37802-2;X6RJP6	0.0613491	-0.245818	14.1327	11.2946	13.7844	13.8918	13.8882	10.6943
PRDX4	Q13162	0.242002	-0.246402	13.6144	12.9318	13.4637	13.7685	12.8533	12.6489
UBE2O	Q9C0C9	1.39651	-0.247099	11.719	11.9314	11.8413	11.5585	11.5032	11.6886
TUBB6	Q9BUF5	0.451653	-0.25051	14.0516	14.421	13.8806	13.8458	13.5704	14.1853
DNAJC2	Q99543	0.180722	-0.251979	14.2041	14.3844	13.1753	13.2504	14.4147	13.3427
RBM22	E5RHA8;E5RJW4;Q9NW64	0.125873	-0.252019	13.5741	15.0294	13.6302	13.7441	12.9033	14.8303
CSRP2	Q16527	0.565113	-0.253506	16.8452	16.7361	16.6219	16.5605	16.1219	16.7603
EEF1B2	P24534	0.200621	-0.253559	13.9344	14.1236	14.0442	13.3202	13.2736	14.7478
WDR77	Q9BQA1	0.457909	-0.254498	14.169	14.7081	14.4333	14.1492	13.8841	14.5136
PLK1	P53350	0.355339	-0.256111	13.381	13.5268	13.4054	12.6043	13.5876	13.3529
SSR4	P51571	0.207274	-0.256152	13.701	14.5532	13.1137	13.0826	13.8554	13.6615
ATP2A2	P16615;P16615-2;P16615-3;P16615-5	0.268812	-0.257683	13.4768	12.2744	13.2134	12.9326	12.7353	12.5236
AMMECR1	Q9Y4X0	0.295996	-0.258674	13.4598	13.1485	13.2672	12.3533	13.3002	13.4459
TIMM50	M0R003;Q3ZCQ8;Q3ZCQ8-2	0.514992	-0.258803	13.6208	13.3332	13.2268	13.1046	13.4717	12.8281
RPN1	P04843	0.546977	-0.262553	15.0246	14.645	15.0379	14.4013	14.9659	14.5526
GNAQ	B1AM21	0.0839495	-0.26269	14.2708	13.6405	13.5597	11.4566	15.0714	14.155
RBBP4	Q09028;Q09028-3	1.97787	-0.263858	15.069	14.9888	15.0104	14.8377	14.7809	14.6581
ANXA2	P07355	1.3257	-0.265305	19.8587	19.9982	19.7857	19.6575	19.4791	19.7101
MLKL	I3L4A6;Q8NB16	0.46151	-0.265859	11.0463	10.8589	11.6441	11.0639	10.8819	10.8058
ATXN10	Q9UBB4;Q9UBB4-2	0.716107	-0.266255	13.6632	13.7838	13.4929	13.511	13.5442	13.086
ST7	B7Z4L1;B7Z4U3;C9JRW1;C9JU30;E7ENZ9;E7EPD9;E7EPW5;E9PCV1;G3XAH9;H7BXS2;Q9NRC1;Q9NRC1-2;Q9NRC1-3;Q9NRC1-4;Q9NRC1-5;Q9NRC1-6;Q9NRC1-7	0.330818	-0.26708	16.6047	17.302	16.6438	16.5017	16.2076	17.0399
SLC25A5	P05141	0.296599	-0.269477	17.8643	16.9893	17.385	16.909	17.6779	16.8432
HSD17B10	Q99714	0.447179	-0.270496	16.2641	17.0215	16.4492	16.1669	16.1989	16.5576
TXNRD1	A0A087WSW9;A0A087WSY9;A0A182DWI3;E9PIR7;F8W809;Q16881;Q16881-2;Q16881-3;Q16881-4;Q16881-5;Q16881-6	0.437226	-0.270609	14.1731	14.8856	14.2475	14.0671	13.9887	14.4386
POLD1	A0A087WYJ2;A0A2R8Y705;A0A2R8Y7K6;M0QZR8;M0R2B7;P28340	0.314628	-0.270863	12.0438	11.247	12.2682	11.9067	11.4893	11.3505
STARD7	Q9NQZ5	0.9871	-0.271394	14.3283	14.5243	14.2043	14.0887	13.9228	14.2312
TRIP6	Q15654	0.341898	-0.271739	12.8751	13.1846	12.4651	12.0751	12.9203	12.7142
ACLY	P53396	0.640699	-0.272537	15.5116	15.967	15.4981	15.1911	15.3806	15.5875
HADHA	H0YFD6;P40939	0.2818	-0.272831	12.2705	12.9655	12.4624	12.603	11.6332	12.6437
TTLL12	Q14166	0.586314	-0.273102	16.1691	16.2705	15.7202	15.796	15.9813	15.5632
NUP155	O75694	1.70161	-0.273189	15.9903	16.1051	15.9492	15.7688	15.822	15.6343
PLEC	Q15149	0.796028	-0.273612	15.2596	15.134	15.1811	15.0429	15.1002	14.6107
POLR1B	Q9H9Y6;Q9H9Y6-3;Q9H9Y6-5	0.303615	-0.27384	11.2742	11.6277	11.2987	11.0514	10.5631	11.7645
GTF2I	A0A494C1K3;P78347;P78347-2;P78347-3;P78347-4	1.12927	-0.274543	15.2647	14.9188	14.9661	14.8351	14.7086	14.7822
NCBP1	Q09161	0.189176	-0.274969	13.5697	14.2495	13.3098	12.9686	12.9402	14.3952
MRPS35	P82673	0.220146	-0.275039	11.6986	11.9512	10.7293	10.9166	10.8273	11.8099
NXN	Q6DKJ4	0.767534	-0.275284	13.4872	13.7543	13.3422	13.1936	13.0937	13.4704
PLCG1	P19174;P19174-2	0.400641	-0.275455	13.2611	14.1613	13.416	13.2623	13.5101	13.2396
TUBA1C	F5H5D3;Q9BQE3	0.34831	-0.276524	15.1797	16.0728	15.4959	15.1922	15.0307	15.696
GEMIN5	Q8TEQ6	1.11416	-0.278281	16.3117	16.2623	16.0364	15.8603	15.8284	16.0868
NUP93	Q8N1F7;Q8N1F7-2	0.318955	-0.280075	13.8271	13.3187	13.5833	13.0435	13.9478	12.8975
CANX	A0A7P0T840;A0A7P0T8G1;A0A7P0T937;A0A7P0T9L0;A0A7P0TAE9;A0A7P0TB65;A0A7P0Z4D6;P27824;P27824-2	0.419824	-0.281283	14.1505	14.2409	13.8405	13.8087	14.2374	13.3421
TRIM47	Q96LD4;Q96LD4-2	1.07109	-0.281742	13.8824	14.2129	13.8723	13.6439	13.6665	13.8119
MAP4	A0A804HKE7;E7EVA0;P27816;P27816-6	0.756915	-0.283044	16.1402	15.9874	15.8099	15.4117	15.8648	15.8118
MYO1B	E9PDF6;O43795;O43795-2	0.583044	-0.283105	13.9771	14.1181	13.5739	13.5183	13.416	13.8854
ELP3	B4DKA4;Q9H9T3;Q9H9T3-2;Q9H9T3-4;Q9H9T3-5	0.388303	-0.283902	13.1961	12.3509	12.6779	12.5576	12.7171	12.0985
HNRNPUL2-BSCL2;HNRNPUL2	H3BQZ7;Q1KMD3	0.583139	-0.284165	13.9498	13.5791	13.6036	13.077	13.5177	13.6853
CLIC1	O00299	0.310439	-0.284177	14.2865	13.1855	13.4858	13.2923	13.1056	13.7074
GCAT	O75600;O75600-2	0.216423	-0.288146	14.0621	15.3674	14.2848	13.9927	13.9251	14.932
KRT3	P12035	0.0747899	-0.289088	10.4607	10.0054	11.0865	8.78457	12.8667	9.03409
RFC3	P40938;P40938-2	0.74933	-0.289358	12.3833	12.6447	12.4809	12.0132	12.5301	12.0974
ACTR3	P61158	0.706615	-0.289408	14.7539	15.1566	14.751	14.4145	14.5306	14.8481
CCAR2	E5RHJ4;Q8N163;Q8N163-2	0.231751	-0.289973	14.6227	15.781	14.9019	14.3692	14.5744	15.4921
DAP3	P51398;P51398-2;P51398-3;V9GYA7;V9GYF7;V9GYW1;V9GZ61	0.371048	-0.290365	13.3348	13.9819	13.6993	12.8962	13.424	13.8245
DNAJC19	F2Z3A7;G5E9V2;Q96DA6	0.180107	-0.291049	12.6614	12.6205	12.1811	11.0115	12.6938	12.8846
ISCA2	Q86U28	0.142547	-0.29114	14.7315	13.4954	13.9415	14.4175	14.4433	12.4342
RFC5	P40937;P40937-2	0.48249	-0.291292	12.9765	12.5589	13.0491	12.8314	12.1473	12.7318
PABPC4	A0A7I2V4L7;B1ANR0;Q13310;Q13310-2;Q13310-3	0.331255	-0.291469	14.3602	14.4182	13.9361	14.5511	13.8701	13.4189
NACA	A0A7I2V2K5;A0A7I2V473;E9PAV3;E9PAV3-2;F8VZJ2;H0YHX9;Q13765	0.114392	-0.292466	13.4273	14.135	12.183	13.0096	14.1964	11.662
SERPINH1	P50454	1.31713	-0.293263	14.3979	14.5523	14.4827	14.3724	14.101	14.0797
ZFR	Q96KR1	0.244625	-0.295475	12.2769	13.3193	12.4458	12.5064	11.7252	12.9239
CFL1	P23528	0.256407	-0.296043	18.3385	19.0872	18.3058	17.963	17.8394	19.0409
UBE2D2	P62837	0.817133	-0.296333	16.3086	16.0545	16.3999	16.2226	15.8315	15.8199
FSCN1	Q16658	0.637993	-0.297499	13.8745	13.8116	13.6102	13.0957	13.5553	13.7528
ARPC3	C9JZD1;F8VR50;O15145	0.845504	-0.298116	15.2621	15.0636	15.3115	15.036	15.0816	14.6252
KARS1	Q15046	0.563157	-0.298252	14.9442	14.3362	14.7009	14.0535	14.489	14.544
NAA15	A0A0B4J1W3;Q9BXJ9	0.509443	-0.298291	12.1419	12.2305	11.8363	11.5972	11.4953	12.2214
RANBP2	P49792	1.55883	-0.298506	13.5499	13.4587	13.2776	13.069	13.1968	13.1248
TRIM28	Q13263	0.430182	-0.298508	15.6775	16.013	15.414	14.9588	15.4633	15.7867
CNOT1	A5YKK6;A5YKK6-2;A5YKK6-3;A5YKK6-4	0.330523	-0.299704	12.5301	13.0174	12.781	11.8249	12.6009	13.0035
CDC20	Q12834	0.497582	-0.300095	13.8361	14.2925	13.7714	13.4693	13.452	14.0784
SNTB2	A0A140TA73;Q13425;Q13425-2	0.339309	-0.300357	13.9139	13.5943	13.7216	13.3222	12.8993	14.1073
CPNE1	A6PVH9;B0QZ18;F2Z2V0;Q99829	0.256164	-0.301515	12.1272	12.3167	11.8252	11.1317	11.5947	12.6381
RAD54B	Q9Y620	1.4033	-0.303609	12.014	12.3164	12.1633	11.798	11.8242	11.9607
ASMTL	O95671;O95671-3	0.882245	-0.303782	12.292	12.1986	11.8201	11.6761	11.9188	11.8045
CSE1L	P55060;P55060-3	1.7653	-0.305226	15.8634	16.0591	15.8159	15.5897	15.5808	15.6522
IMPDH2	A0A7I2V2T3;A0A7I2YQK5;E7ETK5;H0Y4R1;P12268	1.45527	-0.305564	15.4189	15.1764	15.2196	14.9396	15.0855	14.8732
CMTR1	Q5T7F5;Q8N1G2	0.0919081	-0.305976	7.13515	10.8158	9.62607	8.41985	9.85053	8.38873
SDE2	Q6IQ49;Q6IQ49-2	0.329849	-0.307334	16.5129	15.9997	16.5475	16.533	16.2142	15.3909
CTNND1	A0A669KB05;A0A669KB62;C9JZR2;H0YC95;O60716;O60716-10;O60716-11;O60716-12;O60716-13;O60716-14;O60716-15;O60716-16;O60716-17;O60716-18;O60716-19;O60716-2;O60716-20;O60716-21;O60716-22;O60716-23;O60716-24;O60716-3;O60716-4;O60716-5;O60716-6;O60716-7;O60716-8;O60716-9	1.03746	-0.30734	14.3821	14.4404	14.053	14.0591	13.8459	14.0485
RTKN	Q9BST9	0.509108	-0.307481	14.099	14.4074	13.7058	13.4753	13.752	14.0623
RPS6KA4	A0A0A6YYC0;E9PJN1;O75676;O75676-2	0.56709	-0.307946	13.8235	14.321	13.7729	13.5594	13.4439	13.9903
FOXK1	P85037	0.722498	-0.308701	13.9344	14.3856	14.1271	13.7201	13.6712	14.1296
NAF1	Q96HR8;Q96HR8-2	0.117623	-0.308945	11.6758	10.6615	11.6425	11.3796	12.357	9.31654
RRP1	P56182	0.274577	-0.309101	13.6046	13.3211	13.0277	13.6587	13.1442	12.2231
VCP	A0A7I2V540;A0A7P0T8A3;A0A7P0T8Q5;A0A7P0TAQ1;A0A7P0TAW3;A0A7P0Z4C6;C9JUP7;P55072	0.233061	-0.31114	12.9054	14.1938	12.4986	12.7438	13.1196	12.801
RNGTT	O60942;O60942-2	0.050345	-0.311776	13.3346	9.62887	12.4263	12.9905	13.5849	7.87912
BTF3	A0A7I2V3T6;A0A7I2V5Y3;A0A7I2YQL2;D6RDG3;H0Y9Y1;P20290;P20290-2	0.068024	-0.312287	13.0368	15.7432	13.8746	11.7792	13.4215	16.517
HECTD1	A0A087X2H1;Q9ULT8	0.525153	-0.313345	12.0111	11.5655	12.1528	11.5036	11.9687	11.317
NOSIP	A0A075B6F9;Q9Y314	0.825666	-0.313868	14.7954	15.2611	14.8427	14.5511	14.5629	14.8436
DPCD	Q5JQQ4;Q9BVM2	0.245206	-0.315247	10.8232	11.8486	10.4864	10.8267	10.1779	11.2079
SEC22A	C9J463;C9JDJ8;C9JNZ0;C9JR77;C9JRY4;C9JZ27;F8WAU7;Q96IW7	0.27682	-0.316359	13.619	14.7278	13.9181	13.4147	13.495	14.4062
EMC8	O43402;O43402-2	0.431114	-0.316756	12.7108	13.0946	12.9272	12.5415	12.1132	13.1277
KIF22	H3BRB3;Q14807;Q14807-2	1.56323	-0.3185	14.9208	14.6842	14.673	14.3503	14.5111	14.4611
CIAO3	Q9H6Q4	0.36107	-0.318749	15.0509	15.6173	14.5214	14.91	14.3689	14.9545
RUVBL2	Q9Y230	0.500762	-0.319342	15.2143	15.7961	15.5024	14.8564	15.0897	15.6087
MAT2B	Q9NZL9	0.586053	-0.319833	15.4639	15.8745	15.364	15.4063	14.8752	15.4614
KDM1A	O60341;O60341-2;R4GMQ1	0.208387	-0.320278	13.2274	13.8861	13.2334	12.6223	12.5297	14.234
SRBD1	Q8N5C6	0.798853	-0.321694	13.4398	13.8457	13.3785	13.1058	13.1314	13.4617
CPNE3	O75131	0.55902	-0.322472	14.4838	13.6967	14.1274	13.9859	13.7736	13.5809
KRT36	O76013	0.1666	-0.322697	13.8756	11.6251	13.0981	13.1104	12.0316	12.4886
UHRF1	A0A087WTW0;A0A087WVR3;Q96T88;Q96T88-2	0.532524	-0.324954	13.4367	13.6985	13.7938	13.3064	13.7512	12.8965
CSK	P41240	1.20536	-0.326789	16.0816	16.4083	16.038	15.8301	15.7723	15.9452
YWHAQ	P27348	0.925091	-0.328612	15.0016	14.7384	14.5512	14.4482	14.6055	14.2516
AAAS	F8VZ44;H3BU82;Q9NRG9	0.348312	-0.333552	14.0405	13.4747	14.2419	13.9373	13.8814	12.9379
GSTP1	A8MX94;P09211	0.955436	-0.333631	13.1725	13.3099	13.3484	13.2506	12.7617	12.8176
PLD3	Q8IV08	0.280332	-0.33441	14.6858	14.0533	14.2908	14.3388	14.5564	13.1314
UBE2T	Q9NPD8	0.226732	-0.335328	12.3551	13.4011	12.6738	12.1491	11.8391	13.4358
THOP1	P52888	0.569601	-0.336749	13.7664	13.0424	13.6207	13.3321	13.225	12.8622
ESYT1	Q9BSJ8;Q9BSJ8-2	0.281568	-0.337127	12.2114	12.0873	12.0828	12.0328	12.4735	10.8638
SH3GL1	Q99961	1.39472	-0.339342	15.4186	15.5774	15.2472	15.1766	14.9642	15.0843
TXLNG	Q9NUQ3	0.577106	-0.340139	13.8523	14.0712	13.5244	13.3326	13.2074	13.8875
NEDD4L	A0A1B0GVY1;A0A6Q8PFI7;A0A6Q8PGP5;A0A6Q8PHJ5;A0A7P0Z498;Q96PU5;Q96PU5-2;Q96PU5-4;Q96PU5-5;Q96PU5-6;Q96PU5-7;Q96PU5-9	0.33301	-0.342384	13.8415	13.5373	12.7571	13.2084	13.4017	12.4986
ARPC4-TTLL3;ARPC4-TTLL3;ARPC4;ARPC4-TTLL3;ARPC4;ARPC4;ARPC4	A0A0A6YYG9;F8WCF6;F8WDD7;H7C0A3;P59998;P59998-2;P59998-3	0.514738	-0.342563	13.4479	14.3706	13.9681	13.3736	13.605	13.7804
SLC3A2	A0A7P0T9F7;A0A7P0TAN7;A0A7P0TBF8;A0A7P0Z4A0;A0A7P0Z4P5;F5GZI0;F5GZS6;F5H056;J3KPF3;P08195;P08195-2;P08195-3;P08195-4	0.220307	-0.343124	14.9908	13.4983	14.8172	14.2839	14.6384	13.3547
FAM120A	Q9NZB2;Q9NZB2-6	0.901414	-0.344312	13.1635	13.4734	13.2094	12.704	12.8925	13.2168
ACTB	P60709	0.575027	-0.345352	16.8677	17.5006	16.9398	16.5303	16.6347	17.107
AIP	A0A804HKH9;O00170	1.01705	-0.345405	16.0958	15.6082	15.8119	15.6179	15.363	15.4988
GCN1	Q92616	1.10334	-0.345911	14.5196	14.5731	14.5636	13.9167	14.39	14.3119
FARSA	Q9Y285	0.612573	-0.347875	16.9926	17.3863	17.0727	16.742	16.4472	17.2188
MYL6	F8W1R7;G3V1V0;P60660;P60660-2	1.25806	-0.348535	15.4978	15.1336	15.1606	15.0214	14.896	14.8289
RAD51C	J3QKK3;O43502	0.928326	-0.348691	12.6809	12.8653	12.775	12.5446	12.6358	12.0946
GNA13	Q14344;Q14344-2	0.416308	-0.348694	12.6831	11.9328	12.8457	11.9545	12.5751	11.8858
SPTLC1	O15269	1.0975	-0.348852	13.2555	13.6367	13.3693	13.1691	13.17	12.8759
SFPQ	P23246	0.799205	-0.350309	13.0621	12.8451	12.4174	12.4302	12.2974	12.5461
BUB3	J3QT28;O43684;O43684-2	1.84277	-0.350563	15.3473	15.4961	15.2762	15.0073	14.9368	15.1237
DDOST	A0A0C4DGS1;P39656;P39656-2;P39656-3	0.643885	-0.351741	14.158	14.6122	14.0459	13.5853	14.1796	13.996
ANKRD39	Q53RE8	1.05962	-0.353268	13.2539	13.2183	13.0379	13.0897	12.746	12.6145
GIGYF2	C9J0V6;C9JHT0;C9JHW1;C9JPV7;C9JRZ2;C9JW88;C9JXQ0;E7ESB6;F8WCD5;I1E4Y6;Q6Y7W6;Q6Y7W6-3;Q6Y7W6-4;Q6Y7W6-5	0.184111	-0.354122	10.7147	12.1106	10.2298	10.1559	10.2353	11.6015
LYZ	A0A0B4J259;F8VV32;P61626	0.197982	-0.354692	13.5011	15.7925	15.1699	14.4614	14.6134	14.3247
IPO4	Q8TEX9;Q8TEX9-2	2.05916	-0.35834	13.502	13.5119	13.5797	13.308	13.1418	13.0688
HLA-A;HLA-A;HLA-A;HLA-C;HLA-C;HLA-C;HLA-A;HLA-C;HLA-A;HLA-A;HLA-C;HLA-A;HLA-A;HLA-A;HLA-A;HLA-A	A0A0G2JI36;A0A0G2JIF2;A0A0G2JL56;A0A140T912;A0A140T930;A0A140T937;A0A1W2PQD0;A0A1W2PRZ0;A0A1W2PS24;A0A1W2PSE7;O78179;P04439;P04439-2;Q5SRN5;Q5SRN7;Q5SUL5	0.233665	-0.358431	15.3086	14.5964	14.953	15.235	15.0826	13.4651
DLAT	A0A7P0T997;A0A7P0TA47;A0A7P0TAG1;A0A7P0TAX2;A0A7P0TBE2;A0A7P0TBK2;A0A7P0Z4G4;E9PEJ4;H0YDD4;P10515	0.0839755	-0.358699	13.2976	10.2456	13.4266	12.7998	13.3071	9.78685
PBK	Q96KB5;Q96KB5-2	0.421672	-0.359805	15.22	15.6306	14.9401	14.5763	14.6246	15.5104
SIAH2	O43255	0.707638	-0.360071	11.939	12.0664	11.6968	11.4213	11.2599	11.9409
HNRNPH2	P55795	0.756783	-0.360777	14.0424	14.1792	13.8963	13.8164	13.2782	13.941
PRDX1	Q06830	0.644328	-0.361624	19.5872	20.0742	19.5334	19.2045	19.1638	19.7416
PSMA6	G3V5Z7;P60900;P60900-2	0.909714	-0.362026	12.6928	12.9877	12.3956	12.4643	12.3114	12.2144
MAPK8	P45983-3;P45983-4	0.335357	-0.362119	13.0311	13.9291	12.5499	12.6693	12.5752	13.1793
DIS3	F2Z2C0;Q9Y2L1	0.241166	-0.362357	12.7884	13.9043	13.4416	13.406	12.0302	13.611
GPN1	Q9HCN4;Q9HCN4-2;Q9HCN4-3;Q9HCN4-4;Q9HCN4-5	0.478326	-0.365299	11.408	12.144	11.6527	11.2343	11.0183	11.8563
BOLA1	Q9Y3E2	0.913871	-0.366023	15.1312	14.7663	15.173	14.9057	14.6265	14.4403
DBNL	H0Y5J4;Q9UJU6;Q9UJU6-5	0.973116	-0.367599	12.3939	12.0995	12.0707	12.0836	11.5888	11.7889
SNRPD1	P62314	0.396008	-0.36909	14.1512	14.9857	14.1993	14.113	13.5631	14.5528
CS	A0A0C4DGI3;B4DJV2;H0YIC4;O75390	0.542964	-0.371363	10.1714	9.27465	9.71577	9.20101	9.66084	9.18588
DUSP9	Q99956	0.872838	-0.371484	11.766	11.7806	11.9127	11.222	11.8312	11.2916
MYO1C	F5H6E2;O00159;O00159-2;O00159-3	0.684277	-0.372889	16.1541	16.6652	16.0742	15.7541	16.2545	15.7663
CISD2	D6RCF4;Q8N5K1	0.829429	-0.373147	12.8396	12.5922	12.7343	12.7325	12.0886	12.2254
CACYBP	Q9HB71	1.25784	-0.376386	14.4281	14.5066	14.2442	13.9996	13.823	14.2271
USP24	Q9UPU5	0.459411	-0.377325	12.9034	13.3082	12.8647	12.2417	12.412	13.2905
MYH9	P35579	0.644668	-0.377525	15.5498	15.8742	15.4167	14.7828	15.4822	15.4432
COASY	Q13057;Q13057-2	1.16008	-0.379108	14.4722	14.982	14.6847	14.2931	14.2907	14.4178
UNC45A	A0A1W2PNX8;Q9H3U1;Q9H3U1-2	0.376048	-0.379303	14.3366	14.9137	14.3086	14.6984	14.2936	13.4291
SMNDC1	O75940	0.914385	-0.379882	14.4372	14.9441	14.6155	14.0363	14.3998	14.4209
METTL2B	Q6P1Q9	0.549305	-0.380055	14.194	14.1314	14.3256	13.2406	14.2035	14.0667
ASPSCR1	C9JAL9;J3KRG1;J3QR50;J3QRW3;Q9BZE9;Q9BZE9-2	0.149624	-0.383252	11.2097	11.7194	9.56577	9.30791	10.318	11.7192
SF3B4	Q15427	0.262792	-0.383384	13.8594	14.4254	13.7532	13.5011	12.759	14.6278
METTL2A	Q96IZ6	1.39343	-0.384637	14.5122	14.3297	14.1882	13.8598	13.8818	14.1346
RTN3	B7Z4M1;O95197-3;O95197-5;O95197-6	0.163913	-0.385529	11.0042	9.32944	11.6298	10.773	10.8801	9.15372
PRPF40A	A0A7N4I394;O75400;O75400-2;O75400-3	0.376867	-0.386805	13.681	14.8955	13.7172	13.4244	13.7227	13.9862
PDCD6	A0A024QZ42;O75340;O75340-2	0.529309	-0.38833	13.9284	13.5679	14.0001	13.7814	13.692	12.858
SMU1	Q2TAY7	0.645132	-0.389928	13.3313	12.9665	13.3443	13.1268	13.0027	12.3428
PSMC5	P62195;P62195-2	0.269251	-0.389972	13.5554	13.5322	13.3638	13.314	13.9639	12.0036
FTSJ1	Q9UET6;Q9UET6-2	0.230145	-0.390127	13.8926	15.3967	14.104	13.8316	13.41	14.9813
PLPBP	O94903	0.835333	-0.391716	17.2285	17.6361	17.2293	16.9234	16.7064	17.289
CCNB1	P14635;P14635-2	0.565818	-0.392872	13.1195	13.9941	13.3845	12.9205	12.958	13.4411
WDR5	P61964	0.313166	-0.39531	13.8892	13.662	12.8352	13.5862	13.3442	12.2701
POLR3K	Q9Y2Y1	0.540709	-0.395386	14.141	14.9377	14.2678	13.9032	14.464	13.793
PSMD1	A0A087WW66;A0A7I2V262;A0A7I2V2K8;A0A7I2V4X0;A0A7I2V523;A0A7I2V5C8;A0A7I2V641;A0A7I2YQI9;A0A7I2YQY1;A0A7P0MW50;Q99460;Q99460-2	0.455001	-0.397156	12.6789	12.3669	12.9046	11.8702	11.9524	12.9363
QTRT2	Q9H974;Q9H974-2;Q9H974-3;Q9H974-4	0.4496	-0.398596	12.7549	13.6467	12.9294	12.4553	12.4349	13.245
HP1BP3	Q5SSJ5	0.202939	-0.39991	11.857	13.6973	12.1851	11.9856	11.4155	13.1386
MAPK1IP1L	Q8NDC0	0.708516	-0.400212	15.0585	15.7902	15.1728	14.8906	14.7585	15.1718
ANXA7	P20073;P20073-2	0.766959	-0.401228	13.3937	13.9167	13.3373	13.3305	12.8401	13.2735
TRIM32	Q13049;Q5JVY0	0.637957	-0.401281	12.5533	12.2222	13.0215	11.9652	12.1147	12.5132
SLC25A3	Q00325-2	2.61479	-0.401314	18.258	18.2362	18.1892	17.7387	17.9287	17.812
UBR4	A0A0A0MSW0;Q5T4S7;Q5T4S7-2;Q5T4S7-3;Q5T4S7-4;Q5T4S7-5	0.239438	-0.401346	10.7317	12.6451	11.6641	11.2123	10.6881	11.9365
CTTN	Q14247	0.559578	-0.401996	14.6235	14.7512	14.5015	14.72	14.2978	13.6525
MARCKSL1	P49006	1.35955	-0.402117	13.4424	13.8216	13.4209	13.1342	13.2497	13.0946
ADO	Q96SZ5	0.69735	-0.402154	13.8947	14.4576	13.7832	13.3287	13.75	13.8502
PUS1	F5H1S9;G8JLB3;Q9Y606;Q9Y606-2	0.56568	-0.402306	14.0177	14.6182	13.5455	13.5416	13.73	13.7029
ARAF	P10398	0.331003	-0.402626	12.0153	10.802	11.5137	11.0153	11.6711	10.4368
PSMB6	P28072	0.17612	-0.403022	13.6849	15.5018	13.9997	13.794	12.9564	15.2269
PGM3	A0A087WT27;A0A494C0G1;A0A494C1E2;A0A494C1Q4;H0Y987;J3KN95;O95394;O95394-3;O95394-4	0.313115	-0.40363	14.3102	15.4843	14.3961	13.6802	14.3484	14.9511
EIF5A	I3L397;I3L504;P63241	1.00744	-0.404284	15.5932	16.192	15.7383	15.4551	15.3354	15.5202
H1-2	P16403	0.466455	-0.40454	14.9761	15.2155	14.993	14.9063	13.9341	15.1306
SDHB	P21912	0.830093	-0.404676	15.3701	15.6008	15.0829	14.6104	15.0802	15.1492
XRCC3	O43542	0.552444	-0.405858	12.6249	12.7619	12.8859	11.8744	12.2304	12.9504
DNAJA2	O60884	0.462831	-0.405878	13.48	14.2255	13.2201	13.0282	12.9848	13.695
KIF4A	O95239	0.484312	-0.407202	11.3555	10.8911	11.7731	10.9918	10.4516	11.3547
HDHD3	Q9BSH5	0.525533	-0.407246	15.098	15.9423	15.3044	14.8059	14.8218	15.4952
PDIA3	H7BZJ3	0.31715	-0.407811	13.0702	13.8845	12.3373	12.7222	12.1919	13.1544
SEC61B	P60468	0.950292	-0.408131	13.8884	13.5461	13.6976	13.6482	13.1763	13.0832
SLC25A22;SLC25A22;SLC25A22;SLC25A22;SLC25A22;SLC25A22;SLC25A22;SLC25A22;SLC25A22;SLC25A22;SLC25A22;SLC25A22;SLC25A22;SLC25A18;SLC25A22	A0A0D9SEI9;A0A0D9SFA8;A0A0D9SFE1;A0A0D9SG84;E9PI74;E9PJH7;E9PQ36;K4DIA2;K4DIA8;K4DIB0;K4DIB3;K4DIB6;K4DIB8;Q9H1K4;Q9H936	2.0921	-0.409033	14.329	14.1255	14.0751	13.7864	13.7067	13.8093
PLIN3	O60664;O60664-3;O60664-4	0.589867	-0.40979	15.1277	15.5725	15.0055	14.3946	14.7947	15.287
CDK9	P50750;P50750-2	1.58925	-0.412571	14.1245	14.2824	13.9188	13.6382	13.6423	13.8075
XRCC5	P13010	1.02409	-0.413023	15.3668	15.7025	15.2032	15.0134	14.8032	15.2167
MTMR14	C9JSR1;Q8NCE2;Q8NCE2-2;Q8NCE2-3	0.783367	-0.413397	11.1442	11.41	10.8225	10.8348	10.3682	10.9335
SEPTIN9	Q9UHD8;Q9UHD8-2;Q9UHD8-3;Q9UHD8-5;Q9UHD8-7	2.4141	-0.413701	13.7699	13.9845	13.9564	13.4646	13.4916	13.5136
NCDN	Q9UBB6;Q9UBB6-2;Q9UBB6-3	0.271021	-0.414014	11.2738	12.0337	11.7456	11.741	11.935	10.135
RDH10	E5RK48;Q8IZV5	0.152028	-0.415168	11.068	9.01074	11.6973	10.1676	11.2505	9.11252
H1-0	P07305	0.475427	-0.416752	12.9427	13.4798	13.1612	12.8519	13.338	12.1436
MARS1	P56192	0.714593	-0.420828	13.6463	14.04	13.4813	13.3002	12.9352	13.6697
PSME1	Q06323	0.344025	-0.420962	16.0509	14.8505	15.5824	15.444	15.4377	14.3393
INPP4A	Q96PE3;Q96PE3-2;Q96PE3-3;Q96PE3-4	0.956777	-0.421196	13.1396	13.6218	12.9526	12.8941	12.8393	12.7171
LPCAT1	A0A0G2JQ62;Q8NF37	0.63828	-0.422032	12.2254	12.3024	11.8603	12.0196	11.1797	11.9226
PSMD12	O00232	0.328112	-0.42228	12.2952	11.625	12.4365	12.1957	12.1298	10.7643
SLBP	F8W8D3;Q14493	0.916035	-0.424295	15.0721	15.3557	14.9279	14.8419	14.8974	14.3437
ZWILCH	Q9H900;Q9H900-2	0.867478	-0.425592	13.3675	12.911	12.9058	12.3015	12.8498	12.7563
RNF2	Q99496;Q99496-2;X6RFN3	1.01796	-0.430532	11.4046	11.1274	11.0934	10.5123	11.1009	10.7206
TRMT112	Q9UI30	1.36504	-0.433943	15.3895	15.313	15.0497	14.9367	14.9104	14.6032
PDE12	Q6L8Q7;Q6L8Q7-2	0.647711	-0.434629	15.2587	15.8963	15.4179	14.7211	15.0213	15.5267
LSM12	Q3MHD2;Q3MHD2-2	0.596558	-0.436187	14.4434	15.0702	14.7277	13.8054	14.3882	14.739
AASDHPPT	Q9NRN7	1.48815	-0.436524	11.8145	12.0413	12.0032	11.3126	11.5212	11.7156
LAMTOR5	A0A0C4DGV4;E9PLX3;O43504;R4GMU8	1.24354	-0.436568	13.3704	13.3641	13.2804	12.9281	13.1687	12.6084
PPP4C	H3BTA2;H3BV22;P60510	0.449429	-0.438579	12.9766	13.1551	13.3811	13.527	12.4554	12.2148
DNAJA1	P31689	1.06349	-0.440928	14.5463	14.679	14.4165	14.2123	13.7563	14.3505
CIAPIN1	Q6FI81;Q6FI81-3	0.200278	-0.441207	14.7637	13.707	14.3423	14.6711	14.5695	12.2488
NSUN3	Q9H649	0.557218	-0.441975	13.3762	12.7377	13.3202	13.1695	12.7566	12.182
DDX39A;DDX39B;DDX39B;DDX39B	O00148;Q13838;Q13838-2;Q5STU3	0.199944	-0.442358	14.6904	13.6448	14.0317	14.61	14.3327	12.097
RXRB	A0A0G2JKR7;P28702;P28702-3	0.291764	-0.442405	12.4714	13.0839	12.552	11.4588	13.3936	11.9277
PRRC2C	E7EPN9;Q9Y520;Q9Y520-2;Q9Y520-4;Q9Y520-5;Q9Y520-6;Q9Y520-7	0.843819	-0.443858	14.4851	14.9793	14.2795	14.124	13.922	14.3663
RELA	A0A087X0W8;E9PKH5;Q04206;Q04206-2;Q04206-3;Q04206-4;Q2TAM5	0.500613	-0.449055	13.7881	14.5718	13.8508	13.3959	13.251	14.2167
RBM8A	Q9Y5S9	0.533548	-0.449656	14.1372	13.9777	13.8978	13.7416	14.0717	12.8504
DCAF7	P61962	0.522875	-0.4504	13.594	14.066	13.4777	12.8419	13.9201	13.0244
DRG1	Q9Y295	0.659667	-0.451109	13.5555	14.2424	13.553	13.7218	13.2652	13.0105
POLRMT	O00411	0.769402	-0.452075	12.0112	11.8918	12.0302	11.808	11.7771	10.9918
DUSP23	Q9BVJ7	1.46145	-0.452594	14.1083	13.8877	14.058	13.5387	13.7981	13.3595
VRK3	Q8IV63;Q8IV63-3	0.331892	-0.453482	12.4186	13.5221	12.7985	12.4963	11.644	13.2385
NEK6;NEK6;NEK6;NEK6;NEK6;NEK7;NEK6;NEK6;NEK6;NEK6	Q5TBG1;Q5TBG7;Q5TBH0;Q5TBH1;Q5TBH2;Q8TDX7;Q9HC98;Q9HC98-2;Q9HC98-3;Q9HC98-4	0.62221	-0.453523	12.4515	12.8577	12.8618	12.8628	12.0311	11.9164
FLAD1	Q5T196;Q8NFF5;Q8NFF5-2;Q8NFF5-3	1.10508	-0.454282	12.838	13.2334	12.849	12.7254	12.2443	12.5878
THUMPD3	Q9BV44	0.717776	-0.454625	15.6246	16.1936	15.7204	14.9869	15.4043	15.7835
TRAP1	Q12931;Q12931-2	0.627405	-0.45492	13.5963	13.8621	13.5039	13.1077	13.7729	12.7169
CD320	Q9NPF0	0.543016	-0.456033	15.1401	15.9453	14.9678	14.6175	14.7458	15.3218
CTU1	Q7Z7A3	1.09638	-0.457492	14.061	14.1991	14.0878	13.3628	13.5952	14.0174
PSMC2	C9JX88;P35998;P35998-2	0.617352	-0.457703	13.485	14.0351	13.6175	13.0136	12.9207	13.8301
GTF3C1	Q12789;Q12789-3	0.919353	-0.458248	12.8396	13.5388	13.1157	12.4972	12.887	12.7351
HMGA2	F5H2A4;F5H2U8;F5H6H0;P52926;P52926-2;P52926-3;P52926-4;P52926-5;P52926-6	0.109539	-0.458516	12.2623	8.81329	7.33344	8.27719	9.65068	9.10558
COPZ1	F8VUC5;F8VVA7;F8VXB1;F8VYZ4;F8W156;F8W651;P61923;P61923-5	0.430204	-0.458659	12.7071	13.6905	12.9383	12.4909	12.1518	13.3172
SPCS2	A0A087WUC6;E9PI68;E9PL01;E9PRB9;Q15005	0.67023	-0.459444	13.8582	13.9552	13.7498	13.8873	13.4616	12.8359
SAFB	Q15424;Q15424-2;Q15424-3;Q15424-4	2.43233	-0.459558	13.5776	13.6013	13.4627	12.9635	13.1581	13.1413
UBASH3B	Q8TF42	0.315667	-0.460026	11.1189	12.0984	10.8115	10.0009	11.147	11.5009
DPYSL2	A0A1C7CYX9;Q16555;Q16555-2	2.20467	-0.461135	14.3859	14.235	14.2685	13.829	13.9678	13.7092
PFKP	Q01813	1.19212	-0.461609	15.7821	16.2297	15.7235	15.3657	15.3606	15.6242
EIF2B4	A0A087WTA5;A0A087WW69;E7ERK9;F8W8L6;Q9UI10;Q9UI10-2;Q9UI10-3	0.15492	-0.463163	11.0703	8.64798	10.6295	9.20878	11.2671	8.48248
VPS35	Q96QK1	0.38542	-0.463571	11.2049	10.6251	10.6189	10.986	10.6319	9.44022
DHX16	A0A140T947;O60231	0.268714	-0.46688	11.1211	9.51962	10.4697	8.94781	10.7222	10.0397
POLD2	A0A087WWF6;F8W8R3;P49005	0.518103	-0.46707	13.6028	14.4635	13.696	13.2061	13.1294	14.0257
WRAP73	A0A0A0MRV3;Q9P2S5	0.728677	-0.467936	12.8031	13.1452	13.2714	12.4719	13.1049	12.2391
KPNA2	A0A7I2V351;A0A7I2V3Z3;A0A7I2V487;A0A7I2YQE1;P52292	1.49406	-0.46877	15.1398	15.5687	15.4361	14.954	14.7747	15.0097
SLC25A1	P53007	2.08529	-0.469198	14.6903	14.7728	14.5683	14.2829	14.2847	14.0562
GSR	P00390-2	1.2784	-0.471324	17.0664	17.4942	16.9845	16.595	16.6987	16.8374
NECAP2	D6RAN6;D6RB24;F6SKB8;Q9NVZ3;Q9NVZ3-2;Q9NVZ3-3	0.443177	-0.472336	10.6687	10.2559	10.526	10.8829	9.69679	9.4539
LGALS1	P09382	1.27172	-0.472617	17.9339	17.6206	17.5915	17.1768	17.5034	17.0479
KPNA1	P52294	0.3639	-0.473459	13.993	12.5614	14.1977	13.0464	12.8471	13.4382
DUS2	E7EUN9;Q9NX74	0.753285	-0.476082	12.1541	12.4037	11.5669	11.5658	11.827	11.3037
TFCP2	F8VWL0;F8VX55;Q12800;Q12800-2;Q12800-3;Q12800-4	0.671515	-0.476968	13.7601	14.3708	13.6389	13.6996	12.9884	13.6508
ACTR2	F5H6T1;P61160;P61160-2	0.258348	-0.47812	11.6716	9.43431	9.82987	9.32466	10.1748	10.0019
TARDBP	A0A087WX29;Q13148	1.80688	-0.478307	13.8017	13.4849	13.621	13.1317	13.2981	13.0429
C5orf51	A0A0C4DGW6;A6NDU8	0.347701	-0.478896	12.031	10.7083	11.0159	11.4978	10.7357	10.085
XPO1	A0A7I2V2Y6;A0A7I2V3P3;A0A7I2YQV4;O14980	0.919618	-0.480028	14.0914	13.7151	14.0847	13.0858	13.5677	13.7976
CRCT1	Q9UGL9	0.263571	-0.480779	9.75381	10.2834	9.38463	10.0045	7.96734	10.0076
PTPN1	P18031	0.342235	-0.480891	13.6576	13.2046	12.8136	13.603	12.8474	11.7829
TTC27	A0A3B3IS02;Q6P3X3	0.148109	-0.482265	9.58926	9.23277	10.193	10.6619	10.0486	6.85768
ACTR5	Q9H9F9	0.457467	-0.484777	13.5915	14.2301	14.0066	13.9469	12.628	13.7989
PPIH	O43447	0.440881	-0.487799	13.3804	14.4765	13.9228	13.3579	12.87	14.0885
OTUB1	F5GYJ8;F5GYN4;J3KR44;Q96FW1	0.60328	-0.487925	12.5381	12.6383	12.7925	12.7092	12.2954	11.5005
PAXX	Q9BUH6	1.01251	-0.491066	15.0507	15.5903	14.8301	14.6674	14.7151	14.6155
GARS1	P41250-2	0.57524	-0.491832	14.5804	15.1712	14.4647	13.8138	14.0757	14.8513
ATG3	F8WDI0;Q9NT62;Q9NT62-2	0.19612	-0.492073	12.8741	11.4588	12.7102	12.2553	13.0941	10.2175
RPP14	O95059	0.346882	-0.496405	12.2795	13.6537	12.9888	12.553	11.6785	13.2013
ELAC2	Q9BQ52;Q9BQ52-4	0.237849	-0.496748	11.5092	10.5442	10.4978	11.3196	10.8716	8.86974
SMC4	C9IYK2;C9J9E4;C9JJ64;C9JR83;C9JWF0;E9PD53;Q9NTJ3;Q9NTJ3-2	0.278315	-0.497258	10.4006	11.4828	10.2996	9.34127	9.95057	11.3993
PPCDC	Q96CD2	0.117962	-0.498343	13.2842	11.3323	12.2368	13.1382	13.2942	8.92595
PSMB5	P28074	0.844083	-0.500971	13.9068	13.1992	13.5894	13.422	12.807	12.9635
KRT23	Q9C075	0.33626	-0.501884	13.447	13.1388	13.4106	13.4519	13.4253	11.6135
WDR18	Q9BV38;U3KQC1	2.67224	-0.502944	14.3918	14.624	14.5126	14.0442	14.0141	13.9613
VPS28	Q9UK41	2.09939	-0.503906	13.2398	13.452	13.1813	12.7105	12.7428	12.9081
CYCS	C9JFR7;P99999	0.267941	-0.508354	11.4037	9.11913	9.71765	10.0544	9.71691	8.94406
RIOX2	D6RCB6;Q8IUF8;Q8IUF8-2;Q8IUF8-4	0.0773116	-0.510106	13.2641	8.52924	13.1785	12.96	12.7669	7.71468
GLG1	H3BM42;Q92896;Q92896-2;Q92896-3	0.469056	-0.510511	12.9511	11.6397	12.4692	11.4785	12.3808	11.6692
SF3B5	Q9BWJ5	0.490135	-0.511526	13.5195	14.0298	13.4417	12.3844	13.2603	13.8118
DOHH	Q9BU89	0.244252	-0.512269	13.7412	12.692	13.7968	13.6647	13.6235	11.4049
RNF114	A0A096LNV3;A0A096LP02;Q9Y508;Q9Y508-2	0.726582	-0.513319	12.0483	12.3681	12.2565	11.0991	11.9354	12.0986
PSMC6	A0A087X2I1;P62333	0.517811	-0.514029	12.8828	13.1062	12.3548	11.6879	12.1457	12.9681
XPO5	Q9HAV4	0.665086	-0.514843	11.9685	12.5515	11.8453	11.2797	11.3873	12.1537
SUB1	P53999	0.426918	-0.518635	12.7001	12.9244	12.6704	11.5176	13.2356	11.9858
KRT27;KRT25	Q7Z3Y8;Q7Z3Z0	0.134628	-0.518788	12.8801	10.2876	10.3076	10.2377	12.7667	8.91465
N4BP1	O75113	0.27183	-0.52188	11.2044	11.77	10.391	9.38507	10.7735	11.6413
ASCC3	Q8N3C0	0.961047	-0.522674	10.4014	11.1238	10.7444	9.94287	10.3581	10.4007
HNRNPD	D6RAF8;D6RF44;H0Y8G5;H0YA96;Q14103;Q14103-2;Q14103-3;Q14103-4	0.106986	-0.523209	9.07661	13.4568	9.56245	8.97745	9.19177	12.357
SHC1	P29353;P29353-2;P29353-3;P29353-6;P29353-7	1.56118	-0.525167	15.6686	16.006	15.6006	15.4103	15.1803	15.1092
LIN7C	Q9NUP9	0.346212	-0.527675	12.2563	12.4822	12.4937	10.8072	11.8629	12.9791
GSDMD	G3V1A6;P57764	0.479751	-0.528812	13.0926	14.1224	14.1541	12.6656	13.3196	13.7975
TSEN34	A0A590UJ73;A0A590UJW4;E7EQB3;Q9BSV6	1.28615	-0.531076	13.7874	14.1164	13.5048	13.1429	13.2569	13.4155
AGL	P35573;P35573-2;P35573-3	1.1488	-0.531848	14.1521	13.9842	14.5932	13.4867	13.897	13.7503
HSPA4	A0A087WTS8;A0A087WYC1;P34932	1.68178	-0.532571	13.1315	13.1565	13.0785	12.3213	12.6429	12.8045
MARS2	Q96GW9	0.90697	-0.532704	13.8778	14.5746	13.9691	13.6218	13.3146	13.8868
INO80C	K7EIY8;Q6PI98;Q6PI98-4	1.04655	-0.53365	13.598	13.999	13.7087	13.2208	12.8826	13.6013
CARS1	B4DKY1;P49589;P49589-2;P49589-3	2.48898	-0.535188	14.4482	14.3925	14.2445	13.9277	13.8298	13.7222
EIF2AK2	A0A7P0TBA9;A0A7P0Z4M0;P19525	0.797542	-0.53783	12.794	12.3672	12.3939	12.3879	12.108	11.4458
TCF25	Q9BQ70	0.73286	-0.538396	13.8168	14.3914	13.5154	13.2676	13.0542	13.7867
TFB2M	Q9H5Q4	0.470076	-0.538687	13.4702	13.4894	13.5243	13.2103	13.6592	11.9983
PALS2	B8ZZG1;Q9NZW5	1.93258	-0.541462	14.2794	14.0492	14.4238	13.7041	13.6135	13.8103
DNAAF5	Q86Y56	0.480151	-0.542337	13.0512	12.931	12.5431	12.3032	13.1048	11.4902
COPA	A0A3B3IS84;A0A3B3ISC6;P53621	1.14496	-0.54413	15.0419	14.9858	14.9653	14.0542	14.4838	14.8226
CDC5L	Q99459	0.442663	-0.547755	12.9203	11.5373	12.5678	12.29	11.9282	11.1638
SRR	Q9GZT4	0.374428	-0.549112	9.77977	9.89769	11.0063	9.60335	8.89688	10.5362
BSG	A0A087WUV8;A0A7P0T8A7;A0A7P0TA85;A0A7P0TB04;P35613;P35613-2;P35613-3;P35613-4	0.546986	-0.553801	13.3971	13.8055	14.268	13.0746	13.9862	12.7484
USP11	G5E9A6;P51784	0.911967	-0.553818	14.6603	14.1213	14.2476	13.7193	14.2217	13.4267
CHAF1B	Q13112	0.872647	-0.554342	13.0899	13.4162	13.6906	12.4805	12.7574	13.2957
KRTAP11-1	Q8IUC1	0.630214	-0.556216	10.3773	10.5667	10.4684	9.80859	9.29176	10.6433
TPX2	Q9ULW0;Q9ULW0-2	1.21427	-0.556772	14.4465	14.9315	14.2528	13.936	13.8894	14.135
PHF5A	Q7RTV0	1.19719	-0.559534	15.5064	15.3803	15.5711	15.2473	15.007	14.5248
OTULIN	Q96BN8	0.275834	-0.562444	10.7199	10.4364	10.9299	10.401	11.3759	8.62208
NLRP2	A0A0G2JLQ8;A0A0G2JLX3;A0A0G2JMG8;A0A0G2JNC8;A0A0G2JP37;A0A0G2JPQ2;J3KN39;Q9NX02;Q9NX02-2;Q9NX02-4;Q9NX02-5	0.542082	-0.563155	15.9326	15.9934	15.324	15.1343	15.915	14.5113
STAT1	A0A669KB52;A0A669KB53;A0A669KB56;A0A669KB68;A0A669KB75;A0A669KBA4;A0A669KBI6;J3KPM9;P42224;P42224-2	0.191795	-0.565087	13.7745	13.0312	13.5244	14.0078	13.9639	10.6631
ACYP2	P14621	0.82315	-0.565199	14.6752	15.1081	14.7447	13.877	14.1182	14.8372
MTCH2	Q9Y6C9	1.505	-0.566137	14.6231	15.1419	14.6555	14.1548	14.2554	14.312
CLPB	A0A2U3TZY2;H0YGM0;Q9H078;Q9H078-2;Q9H078-4	0.609994	-0.568106	11.2461	10.8647	11.1166	9.8339	11.226	10.4632
OSBPL10	Q9BXB5;Q9BXB5-2	0.866841	-0.569128	11.4986	11.658	11.5081	11.3458	10.3878	11.2237
NRDC	O43847;O43847-2	0.393622	-0.569635	14.5545	12.806	14.3063	12.9963	13.8642	13.0975
SQSTM1	Q13501	1.27456	-0.571512	13.6038	14.1118	13.6454	13.1325	13.0379	13.476
CARMIL2	Q6F5E8;Q6F5E8-2	0.896814	-0.571817	13.8935	14.3702	13.832	13.4244	13.0566	13.8992
PMPCA	Q10713;Q10713-2;Q5SXN9	0.47126	-0.572213	13.3601	11.7311	13.1497	12.3873	11.9623	12.1746
COPB2	H0Y938;H0YAC7;P35606;P35606-2	2.2874	-0.575237	14.4204	14.3894	14.4508	13.9788	13.6444	13.9117
PHGDH	A0A286YF22;O43175	1.21718	-0.57628	15.9166	16.4498	16.0218	15.4104	15.3933	15.8556
NASP	P49321;P49321-2;P49321-3	0.847119	-0.579521	13.8861	13.8334	13.6552	12.5942	13.4776	13.5642
RRBP1	A0A087WVV2;F8W7S5;Q9P2E9;Q9P2E9-3	1.01033	-0.580167	13.3897	14.1709	13.3696	12.962	13.1506	13.0771
PHB	P35232	1.26779	-0.580752	16.5881	16.1885	16.7346	15.7365	16.1968	15.8356
CASP14	P31944	0.246521	-0.582644	14.4095	15.7338	13.1697	14.5133	14.3334	12.7183
QARS1	P47897;P47897-2	0.786373	-0.583013	13.1831	13.8254	13.5058	12.4256	12.9182	13.4214
TRMT1L	Q7Z2T5;Q7Z2T5-2	2.63935	-0.583681	11.4226	11.2311	11.482	10.8691	10.7515	10.764
DNAJC7	A0A6I8PIK4;A0A6I8PR89;A0A6I8PU73;A0A6I8PU89;Q99615	0.202608	-0.587741	13.5162	11.2092	13.087	13.2136	12.5022	10.3333
KIF5B	P33176	1.27778	-0.58967	11.9268	12.1231	11.9257	10.99	11.595	11.6217
HMOX2	P30519	0.31558	-0.591464	12.6005	11.5549	12.4969	12.0469	12.5553	10.2758
MVD	P53602	3.01933	-0.592655	14.8041	14.993	14.8065	14.2513	14.3286	14.2458
IARS1	A0A0A0MSX9;A0A804HJN6;P41252	1.42248	-0.594708	15.175	15.1356	15.249	14.2991	14.5237	14.9527
SF3A2	Q15428	3.81142	-0.595089	13.6345	13.6726	13.6897	13.1294	12.9954	13.0867
ADAT3	D6W601;Q96EY9	0.451745	-0.59512	8.69702	10.0982	9.77831	9.66197	8.40821	8.71799
TMPO	P42166	0.984254	-0.59684	16.3545	15.8183	16.0362	15.7604	15.6572	15.001
PPAT	Q06203	0.207994	-0.598425	12.0783	9.03083	11.8046	11.4084	10.1237	9.58638
SMURF2	Q9HAU4	1.4646	-0.600548	14.0934	14.2243	14.224	13.4704	13.3284	13.9413
PSME2	A0A087X1Z3;Q9UL46	1.26717	-0.601233	14.3472	14.0435	14.3647	14.0103	13.6085	13.3329
ATAD3A	Q9NVI7-2	1.37768	-0.6055	14.424	15.0198	14.5349	13.9054	14.2247	14.0321
TRMT1	Q9NXH9;Q9NXH9-2	1.04854	-0.606402	13.5283	12.9637	13.3363	12.8758	12.894	12.2392
PMPCB	G3V0E4;O75439	0.403914	-0.60912	13.4087	15.1173	13.2546	12.9545	13.2592	13.7396
PHB2	Q99623	1.25779	-0.613747	15.9736	16.1472	16.1418	15.0705	15.5153	15.8355
ACTR1A	P61163;R4GMT0	0.297423	-0.615082	10.9875	9.81761	11.5368	11.2122	10.3629	8.9215
NOB1	H3BUR4;Q9ULX3	0.84524	-0.617985	13.199	12.7245	12.9745	12.3496	12.8852	11.8093
NAXE	A0A7P0TAG8;Q8NCW5;Q8NCW5-2	0.830982	-0.618522	13.5261	14.0883	13.9833	12.8505	13.0586	13.8329
CLP1	E9PL17;Q92989	1.56791	-0.621295	13.6943	13.9364	13.9422	13.0673	13.5621	13.0797
MRPS27	G5EA06;Q92552;Q92552-2	1.35692	-0.62306	13.457	13.8284	13.314	12.6116	13.0886	13.03
;MAP2K2;MAP2K1;MAP2K2;MAP2K1;MAP2K1	A0A1B0GUL7;G5E9C7;H3BRW9;P36507;Q02750;Q02750-2	0.359003	-0.625005	10.7313	11.8467	11.0175	10.0206	9.84305	11.8569
GPHN	F5H039;Q9NQX3;Q9NQX3-2	1.27597	-0.625619	13.1975	13.0946	13.3878	12.3862	12.3892	13.0277
ZRANB2	O95218;O95218-2	0.117045	-0.627362	13.5978	10.7401	9.62687	8.57116	13.7127	9.79889
SLC25A11	I3L1P8;Q02978	0.696934	-0.627514	14.8487	14.1807	14.9569	13.8308	14.6817	13.5912
PPIL2	A0A7P0T843;A0A7P0T8E8;A0A7P0TA15;A0A7P0TAH4;A0A7P0TB19;A0A7P0Z4K4;Q13356;Q13356-2	0.85849	-0.627831	13.7308	13.0483	13.4384	12.3583	12.6758	13.3
SEC23A	F5H365;Q15436	0.784383	-0.631223	12.7769	12.579	12.1389	11.4535	11.6513	12.4964
DCTN2	A0A7I2V4H4;A0A7I2V4Y9;A8K8J9;F8W1I6;H0YHL1;Q13561;Q13561-2;Q13561-3	0.383048	-0.63283	11.2732	10.8163	9.1641	9.81273	10.2368	9.3056
PLCB3	Q01970;Q01970-2	0.364195	-0.634835	13.6591	11.6145	13.5201	12.3101	12.8224	11.7567
RTF2	Q9BY42	0.405134	-0.636717	12.7294	14.3792	12.6514	13.1731	11.9541	12.7227
MED16	Q9Y2X0;Q9Y2X0-2;Q9Y2X0-3	0.701112	-0.637129	12.7809	13.7282	13.1826	12.2511	13.2133	12.316
DEK	A0A494C028;B4DFG0;H0Y993;P35659;P35659-2	0.556801	-0.637681	14.518	13.775	14.0254	13.4668	14.2632	12.6753
IMMT	A0A087WYS0;B9A067;D6RAW4;Q16891;Q16891-2;Q16891-3;Q16891-4	0.821505	-0.638086	10.4335	9.96345	10.7399	9.30461	9.6546	10.2634
PYCR1	E2QRB3;P32322;P32322-2	0.591267	-0.638263	13.9034	14.7879	14.1229	12.8646	13.8106	14.2243
UBLCP1	Q8WVY7	0.558361	-0.639414	11.6642	10.8147	12.1491	10.3477	11.4743	10.8878
TRMT6	Q9UJA5;Q9UJA5-2;Q9UJA5-3	0.520166	-0.639485	12.4312	13.3442	12.5163	11.3273	12.1438	12.9022
CAPRIN1	Q14444;Q14444-2	0.984993	-0.644684	14.4973	14.6099	14.0311	13.61	13.3769	14.2174
UQCRC1	P31930	0.735467	-0.646515	12.3109	12.6809	12.3092	11.1888	11.6707	12.5019
CHUK	O15111	0.229151	-0.647144	11.7487	9.50926	10.9186	10.9951	10.9467	8.29334
ABHD14B	F8W9U3;Q96IU4;Q96IU4-2	0.366493	-0.648391	11.2878	9.76167	11.5098	9.30562	10.2963	11.0122
HNRNPUL1	A0A0A0MRA5;B7Z4B8;M0R3F1;Q9BUJ2;Q9BUJ2-2;Q9BUJ2-4	1.40017	-0.649837	13.1013	13.2264	13.0544	12.071	12.5883	12.7733
PES1	B3KXD6;B5MCF9;O00541;O00541-2	0.194368	-0.649914	13.4908	12.4737	12.7798	13.3301	13.686	9.7784
EWSR1	B0QYK0;Q01844;Q01844-3;Q01844-5;Q01844-6	0.255919	-0.650702	14.2982	11.6169	12.3898	12.4529	12.9868	10.9131
TBC1D15	C9JA93;Q8TC07-2;Q8TC07-3	0.604177	-0.651023	12.8275	12.4289	12.6244	12.0708	12.7364	11.1206
NUFIP2	Q7Z417	0.210119	-0.651794	12.8115	11.0993	11.7246	9.11063	12.7593	11.8101
ANXA11	P50995;P50995-2	0.27309	-0.652655	13.8694	12.8176	13.7507	13.5836	13.8599	11.0362
IRS1	P35568	1.49235	-0.655031	15.0673	15.1696	14.6719	14.1521	14.2087	14.5829
RCN2	A8MXP8;Q14257;Q14257-2	0.393603	-0.655907	12.8687	11.8785	12.8351	12.9287	11.9182	10.7677
PARP1	A0A7I2V3E1;P09874	0.792729	-0.659296	12.2906	12.1357	12.0241	11.5527	12.1093	10.8106
PPM1G	O15355	0.776218	-0.659446	13.8224	14.0851	13.422	12.7652	12.7875	13.7985
SURF4	O15260;O15260-2;O15260-3;Q5T8U5	1.78653	-0.659716	13.9584	13.744	13.8468	13.4126	13.262	12.8954
TRIP13	Q15645	1.53847	-0.660746	14.1499	13.5427	14.0272	13.1076	13.3313	13.2986
APEX2	Q9UBZ4	0.27312	-0.666276	11.6452	11.8428	8.95193	10.716	9.72263	10.0024
HADHB	B5MD38;C9JE81;C9JEY0;F5GZQ3;P55084;P55084-2	0.858689	-0.671154	10.5428	11.1556	10.5289	10.0247	10.6107	9.5784
CCNH	A0A2R8YEM2;D6RG18;D6RHI7;P51946	0.506214	-0.67213	11.3341	12.3035	11.859	11.0457	10.3411	12.0933
HNRNPA3	A0A7I2V2R3;A0A7I2V5D8;P51991	1.2361	-0.675449	15.7688	15.0237	15.4899	14.6569	15.0211	14.5781
SESTD1	C9J4X8;C9JHW6;F8WFB2;Q86VW0	1.74741	-0.67732	11.0074	10.7315	10.7515	9.93047	10.0884	10.4396
KDM3B	Q7LBC6	0.897653	-0.67834	13.0871	13.1587	12.9318	12.7767	11.6913	12.6745
AQR	O60306	0.280213	-0.685749	10.9025	8.78782	10.2383	7.8174	9.6918	10.3622
EIF2S3;EIF2S3B	P41091;Q2VIR3	0.639753	-0.687307	12.2103	11.353	10.9974	11.1195	11.1943	10.185
AGPS	A0A1B0GWA2;A0A2R8YEL0;A0A7P0T984;A0A7P0TAL3;A0A7P0TAU9;B7Z3Q4;O00116	1.77671	-0.689333	12.6331	12.6714	12.489	11.8455	11.6593	12.2208
PGLS	O95336	1.10679	-0.690365	15.9765	15.3899	15.7567	15.4104	14.5876	15.054
NABP2	C9JMP5;C9JT95;Q9BQ15	0.353098	-0.692336	10.9974	9.4025	11.3589	9.03246	9.7306	10.9187
SPC24	A0A0A0MSN0;K7EJH0;K7EJV2;K7EMX1;K7ERQ7;K7ESQ2;Q8NBT2;Q8NBT2-2	0.312095	-0.692575	10.933	8.99557	10.7441	10.8561	8.77812	8.96079
CKAP5	Q14008;Q14008-2;Q14008-3	1.77635	-0.692774	12.3203	11.9043	12.3877	11.5926	11.6067	11.3347
IGKC	P01834	0.248399	-0.696868	12.4631	13.1746	12.3215	13.2765	12.7741	9.81805
PPIB	A0A7P0Z497;P23284	0.686295	-0.697951	14.9214	14.8325	13.6409	13.4577	13.6783	14.165
MTPN	P58546	0.390039	-0.701455	14.4318	12.9078	14.1002	14.1648	12.0839	13.0867
;MUTYH;MUTYH;MUTYH;MUTYH;MUTYH;MUTYH;MUTYH;MUTYH;MUTYH;MUTYH	A0A5F9ZGZ0;A0A5F9ZI14;E9PM53;Q5T413;Q5T418;Q9UIF7;Q9UIF7-2;Q9UIF7-3;Q9UIF7-4;Q9UIF7-5;Q9UIF7-6	0.297427	-0.701652	11.4805	8.83874	11.175	10.2251	10.3047	8.85948
NDUFV2	E7EPT4;P19404	0.228797	-0.702275	11.4747	9.03935	11.5604	9.89971	11.5443	8.52372
CEP85	H7BZW2;Q6P2H3;Q6P2H3-2;Q6P2H3-4	0.745012	-0.703719	10.5999	9.88829	10.6618	10.2628	9.03577	9.74024
GALE	Q14376;Q14376-2;Q5QPP3	0.383179	-0.704727	11.023	9.45426	10.2524	8.30249	10.3413	9.97169
AKT1S1	Q96B36	1.7875	-0.705031	13.5507	13.7897	13.4559	12.7038	12.7958	13.1815
NDUFB9	A0A3B3IT57;A0A7I2V620;A0A7I2YQN0;E7EWZ0;E9PF49;E9PH64;Q9Y6M9	0.826982	-0.709699	12.2229	13.3911	12.9359	11.7314	12.3948	12.2947
AHNAK	Q09666	0.875591	-0.71283	13.2266	13.0988	13.268	12.8273	12.8928	11.7347
AAMP	C9JEH3;C9JG97;C9JTS3;Q13685	0.809415	-0.713321	13.1116	13.4894	13.0402	11.7357	12.8409	12.9247
PSMA2;;PSMA2	A0A024RA52;A0A7I2V2H3;P25787	0.59894	-0.714419	12.86	13.4692	12.6345	13.0707	11.437	12.3128
MYBBP1A	I3L1L3;Q9BQG0;Q9BQG0-2	0.393583	-0.715035	10.5619	12.4611	12.861	10.7949	11.15	11.794
AP2S1	M0QYZ2;M0QZ21;M0R0N4;M0R1S0;P53680;P53680-2;X6R390	0.451097	-0.715124	12.0092	9.85644	11.6819	10.6881	10.4819	10.2321
AP3S1	Q92572	0.995577	-0.715494	14.2915	14.8026	14.3455	13.4265	13.5132	14.3532
SRP19	A0A087WWU9;A0A2U3TZN1;P09132;P09132-2	0.271452	-0.716432	11.7331	13.3088	10.3177	11.6162	11.7414	9.8526
MYL12A;MYL12B;MYL12A	J3QRS3;O14950;P19105	1.3514	-0.716606	14.434	15.0842	14.6484	14.1194	14.2033	13.6941
TUBG1;TUBG2	P23258;Q9NRH3	2.39956	-0.716946	12.8163	12.7619	12.7885	11.8936	12.2984	12.0239
POLDIP3	F6VRR5;Q9BY77;Q9BY77-2	0.328657	-0.717776	13.07	11.505	10.3049	10.7307	11.688	10.3078
EIF4EBP1	Q13541	0.564884	-0.718343	14.0466	15.1325	14.1025	13.6258	12.9901	14.5106
PRDX3	P30048;P30048-2	2.01637	-0.718514	18.283	17.9992	18.3208	17.6658	17.5148	17.2668
ITGB1	A0A7I2V2F9;A0A7I2V348;C9JPK5;E7EUI6;H7C4K3;P05556;P05556-2;P05556-3;P05556-4;P05556-5	0.789591	-0.719128	13.085	12.2203	13.342	12.6598	11.9153	11.9149
CSTA	C9J0E4;P01040	0.384389	-0.720453	15.3308	15.7884	15.3445	14.3056	13.7184	16.2784
RNMT	K7EP06;O43148;O43148-2	0.551807	-0.726012	14.3719	13.6165	13.8785	12.6835	14.3072	12.6981
;;PCLAF;PCLAF;PCLAF	A0A0U1RQC1;A0A0U1RQM0;H0YMA4;Q15004;Q15004-2	0.712064	-0.726138	13.3357	13.928	13.1235	12.2352	12.4493	13.5243
HERC4	Q5GLZ8;Q5GLZ8-2;Q5GLZ8-3;Q5GLZ8-6	0.325104	-0.727178	11.2142	9.61771	10.0917	10.8963	9.67319	8.17259
PITHD1	Q9GZP4;Q9GZP4-2	1.32978	-0.727605	15.1438	15.911	15.1823	14.7426	14.5701	14.7416
COPG1	Q9Y678	1.16659	-0.729364	12.7436	12.8571	12.5803	11.4868	12.0428	12.4633
AIMP1	A0A5F9ZHC5;A0A804HJ47;Q12904;Q12904-2	0.511775	-0.731956	14.2716	14.8427	14.0531	12.5242	14.0007	14.4466
FOCAD	Q5VW36;S4R400	0.507926	-0.734068	10.0315	8.52602	10.6416	9.06333	9.07706	8.85661
DVL3;DVL2;DVL2;DVL2;DVL2;DVL3;DVL3	A0A3B3ITC6;I3L0M7;I3L2N2;I3L2W9;O14641;Q92997;Q92997-2	0.615375	-0.736202	10.0583	10.3102	9.0497	8.32065	9.44443	9.44446
MINPP1	Q9UNW1;Q9UNW1-2;Q9UNW1-3	0.593148	-0.743963	10.4937	10.3317	12.0848	10.1726	10.2057	10.2999
CDK6	Q00534	1.62734	-0.747003	15.7944	16.2745	15.7598	15.2095	14.9674	15.4109
FOXRED1	Q96CU9;Q96CU9-3	0.688582	-0.747975	11.417	12.4044	10.8814	10.4801	10.7659	11.2128
SDHA	D6RFM5;P31040;P31040-2	0.852205	-0.748743	14.2146	15.0562	14.218	13.3757	13.532	14.3348
DDX23	Q9BUQ8	0.472728	-0.749701	8.56782	9.94088	10.1459	7.84881	9.27785	9.27888
MMTAG2	Q9BU76;Q9BU76-4	0.3168	-0.752113	12.196	11.5543	11.697	11.0539	12.7177	9.41939
CTBP2	P56545;P56545-2;P56545-3	0.841432	-0.753912	13.6801	14.3752	14.0964	12.6464	13.34	13.9035
WAPL	Q7Z5K2;Q7Z5K2-2;Q7Z5K2-3	1.22894	-0.754659	13.3272	13.0756	13.3295	12.2366	13.0406	12.1913
PSMD13	A0A087WUL9;Q9UNM6;Q9UNM6-2	0.610274	-0.75633	12.2496	10.7859	11.4316	11.0599	11.1249	10.0133
KIAA0100	K7EQ86;Q08E86;Q14667;Q14667-2;Q14667-3	0.228047	-0.756337	19.0763	20.7603	19.9193	19.569	16.9034	21.0144
MCM6	Q14566	1.07805	-0.758605	13.2	13.4001	12.6362	12.0963	12.0664	12.7979
GPT2	Q8TD30;Q8TD30-2	1.25545	-0.761806	14.4016	13.6983	14.1097	13.6094	12.9328	13.3821
OGT	O15294	1.81783	-0.763846	15.1226	15.4475	14.9494	14.3016	14.2816	14.6447
HDLBP	A0A024R4E5;Q00341;Q00341-2	0.985625	-0.765411	12.8515	12.3018	11.9293	12.0147	11.6106	11.161
NR2F1;NR2F1;NR2F1;NR2F2;NR2F2;NR2F2	F1DAL7;F1DAL9;P10589;P24468;P24468-2;P24468-3	1.77979	-0.766548	11.4672	11.5667	11.9484	11.1367	10.7137	10.8322
EHMT2	A0A0G2JIS2;Q96KQ7;Q96KQ7-2;Q96KQ7-3	0.308734	-0.767046	12.8965	14.3381	13.1083	13.2832	10.8954	13.8633
SPRYD7	Q5W111;Q5W111-2	0.70684	-0.769154	13.7348	13.918	13.2168	13.4493	11.9715	13.1413
MTPAP	Q9NVV4-2	1.29439	-0.769873	12.3088	13.0053	12.2732	12.0475	11.5935	11.6367
SEC23IP	Q9Y6Y8;Q9Y6Y8-2	1.25212	-0.770051	12.4846	13.1346	12.3542	11.5957	12.1402	11.9275
DSG2	Q14126	0.921568	-0.770144	12.7396	13.1503	12.2068	11.9777	11.423	12.3856
EPCAM	B5MCA4;P16422	0.919554	-0.773166	14.5178	13.907	14.4526	13.8905	12.8368	13.8305
ALDH18A1	P54886;P54886-2	2.07167	-0.773351	14.3778	14.8227	14.3395	13.8021	13.7533	13.6646
ALDH1B1	P30837	0.210214	-0.773462	12.5594	11.4619	11.0618	12.1711	12.3755	8.21619
ANXA10	Q9UJ72	0.534734	-0.77597	10.9168	9.17814	10.7756	9.54587	8.95547	10.0414
ITGA6	P23229;P23229-2;P23229-3;P23229-4;P23229-5;P23229-6;P23229-7;P23229-9	0.686463	-0.777206	11.3604	9.78569	11.0584	10.318	9.78846	9.76643
HMGCL	P35914	1.50405	-0.784129	13.5853	14.3768	13.7665	13.0676	13.1552	13.1534
IMPACT	A0A3B3ITH3;J3QQU0;Q9P2X3;Q9P2X3-2	0.288372	-0.785896	11.4357	8.01289	10.3487	8.35628	9.21098	9.87237
ABHD10	Q9NUJ1;Q9NUJ1-2;Q9NUJ1-3	0.411037	-0.786438	10.9704	10.5747	10.4951	10.8005	10.5808	8.29962
EIF2B1	Q14232	1.10693	-0.791846	12.2924	12.9657	12.486	11.7828	11.3246	12.2612
GCLC	P48506	0.843525	-0.795928	13.7403	14.4763	13.7833	13.0936	12.6301	13.8884
LMNB1	E9PBF6;P20700	1.27195	-0.796352	14.9808	14.9702	14.4103	13.5761	14.3509	14.0452
NT5DC2	Q9H857-2;Q9H857-3	2.1721	-0.796552	14.5442	14.8169	14.5701	13.719	14.1028	13.7197
IGF2BP3	O00425;O00425-2	0.147976	-0.798618	11.6183	12.2945	12.6892	13.7105	7.45222	13.0433
RFC4	C9J8M3;C9JZI1;P35249;P35249-2	0.615094	-0.79869	12.8195	14.1206	12.7621	12.0218	12.0933	13.1911
SH3PXD2B	A0A1B0GUF2;A1X283;G3V144	0.321667	-0.801578	9.56932	10.6194	11.7843	9.98923	8.41325	11.1658
LSM14A	Q8ND56;Q8ND56-2;Q8ND56-3	0.828294	-0.804443	13.2742	13.1515	12.797	13.0351	11.5595	12.2149
TRAPPC1	Q9Y5R8	1.01131	-0.806787	14.3218	13.5345	13.9398	12.8356	13.7201	12.82
RBPJ	A0A7P0T947;A0A7P0T9Y9;A0A7P0TBJ4;A0A7P0Z4N7;D6RF98;Q06330;Q06330-2;Q06330-3;Q06330-4;Q06330-5;Q06330-6;Q06330-7	4.06047	-0.807683	14.4305	14.307	14.3387	13.6106	13.4935	13.5489
PDSS2	Q86YH6	0.272062	-0.809492	11.9294	9.21746	11.8573	11.6819	9.90819	8.98565
;SLC25A10;SLC25A10	B4DLN1;Q9UBX3;Q9UBX3-2	1.34881	-0.809544	13.5201	13.6201	13.7845	12.9611	13.2213	12.3137
MOB4;MOB4;MOB4;MOB4;HSPE1-MOB4	B4DM50;Q9Y3A3;Q9Y3A3-2;Q9Y3A3-3;S4R3N1	1.1941	-0.814882	14.1737	14.7608	13.6853	13.5488	13.3272	13.2992
KRTAP13-2	Q52LG2	0.277459	-0.815369	12.9438	11.0203	13.8776	13.4483	10.8325	11.1148
NT5DC1	Q5QPD0;Q5TFE4	0.752754	-0.817389	13.078	13.8362	13.2915	12.5099	11.8539	13.3898
C8orf82	H0YF29;Q6P1X6;Q6P1X6-2	0.921801	-0.82035	13.7348	14.6101	14.0504	13.1657	12.8311	13.9376
DALRD3	C9JA38;Q5D0E6;Q5D0E6-2;Q5D0E6-3	1.13667	-0.820375	11.8509	12.1715	11.7956	10.6073	11.046	11.7036
PRPF31	E7EN72;E7ESX0;E7EU94;E7EVX8;Q8WWY3;Q8WWY3-2;Q8WWY3-3;Q8WWY3-4	1.10915	-0.828619	12.6233	13.4078	12.5019	11.936	11.7039	12.4073
CSDE1	E9PLT0;O75534;O75534-2;O75534-3;O75534-4	1.24773	-0.828826	12.9806	12.7492	12.2327	12.2295	11.4728	11.7737
PSMC3	E9PKD5;E9PM69;P17980;R4GNH3	1.62023	-0.83289	13.532	14.2368	13.7968	13.0233	12.824	13.2197
EEF1E1-BLOC1S5;EEF1E1;EEF1E1;EEF1E1	C9J1V9;D6RBD7;O43324;O43324-2	0.618364	-0.833566	13.2539	14.3202	12.9158	12.3684	12.1045	13.5163
THOC3	Q96J01;Q96J01-2	0.691439	-0.834736	14.5328	15.4148	14.6261	14.0566	13.1874	14.8255
NPM3	O75607	1.44531	-0.840887	17.732	18.6178	17.9235	17.302	17.2174	17.2312
HIGD1A	Q9Y241	1.09249	-0.840976	13.6624	12.8544	13.3689	12.5239	12.8907	11.9482
HNRNPAB	D6R9P3;D6RBZ0;D6RD18;Q99729;Q99729-2;Q99729-3;Q99729-4	0.286804	-0.841365	12.2499	9.11584	12.5643	9.7583	11.2636	10.384
NAA35	Q5VZE5	0.580493	-0.842013	11.8202	11.6296	10.9279	9.50316	10.8542	11.4942
STOML2	Q9UJZ1;Q9UJZ1-2	0.374556	-0.845312	13.5681	11.9938	13.4601	12.9436	12.9771	10.5654
NAE1	J3KRK3;J3QRA5;Q13564;Q13564-2;Q13564-3;Q13564-4	0.53529	-0.847541	12.8048	11.8392	11.6424	11.8981	11.7936	10.052
GPD2	P43304	2.16558	-0.84838	14.7115	15.1179	14.754	13.809	14.1459	14.0833
BAIAP2L1	Q9UHR4	1.64891	-0.848593	13.0792	12.429	13.1667	12.092	11.987	12.0501
SFSWAP	Q12872;Q12872-2	0.531236	-0.850958	11.6224	11.9296	11.5195	9.80015	10.5606	12.158
PALLD	Q8WX93;Q8WX93-3;Q8WX93-4	1.48891	-0.853806	17.8295	18.5006	17.9863	16.9848	17.1981	17.5721
P4HB	A0A7P0T8C0;A0A7P0T8J3;A0A7P0T8X1;A0A7P0T9D6;A0A7P0T9U6;A0A7P0TA35;A0A7P0TA71;A0A7P0TA97;A0A7P0TB26;H0Y3Z3;H7BZ94;I3L0S0;I3L4M2;I3L514;P07237	0.5095	-0.85384	13.1748	12.7717	13.1979	11.6028	11.3514	13.6286
EXOC6	E7EW84	0.241245	-0.856497	21.292	21.7228	21.3484	21.6773	22.2836	17.8327
LRRC59	Q96AG4	0.913768	-0.858688	15.3693	14.8226	15.2886	14.3176	14.9936	13.5933
NUP153	P49790;P49790-2;P49790-3	1.35747	-0.858772	12.7493	12.3972	12.103	11.4673	11.2139	11.9921
LMNB2	Q03252	1.32172	-0.860271	13.14	13.3497	12.9112	11.8767	12.1364	12.807
COPB1	P53618	1.82556	-0.862857	13.2263	12.6002	13.2324	12.1406	12.13	12.1998
C19orf25	K7EK56;Q9UFG5;Q9UFG5-2	1.10683	-0.863003	13.6068	12.5732	12.9549	12.5347	11.8138	12.1973
ARCN1	B0YIW6;P48444	3.72755	-0.86323	13.2144	13.3452	13.2012	12.3451	12.3434	12.4826
LRRFIP1	Q32MZ4;Q32MZ4-2;Q32MZ4-3	0.380984	-0.864328	10.8467	10.3006	9.10548	8.21942	10.808	8.63231
CHERP	J3QK89;Q8IWX8	1.11747	-0.864803	12.3796	11.8893	11.9837	10.6875	11.8281	11.1426
EDC3	Q96F86	0.601393	-0.864952	12.7083	14.177	12.2977	11.7303	12.1044	12.7534
QRICH1	Q2TAL8	0.640782	-0.865382	11.701	12.1563	12.0023	10.8841	10.175	12.2044
EIF2B2	P49770	1.95785	-0.866398	11.8963	12.5347	12.0692	11.2352	11.3457	11.3202
PUM1	H0YEH2;Q14671;Q14671-2;Q14671-3;Q5T1Z4;Q5T1Z8	1.15423	-0.868553	12.688	13.4757	12.3269	12.0568	11.7599	12.0682
CCDC160	A6NGH7	0.696638	-0.870309	15.901	16.1382	16.0717	15.7593	14.0373	15.7033
ATP5F1B	P06576	1.36899	-0.871184	15.2578	14.6974	15.416	13.8955	14.2675	14.5946
PGP	A6NDG6	0.646415	-0.87148	14.3006	15.4401	14.5861	14.1752	12.9281	14.609
MCCC2	A0A804HJ24;A0A804HJ31;A0A804HK37;A0A804HKE8;A0A804HL02;A0A804HLJ9;Q9HCC0;Q9HCC0-2	0.944319	-0.871956	13.5059	13.148	13.2287	13.2543	11.9338	12.0785
KRT31	Q15323	0.481064	-0.874657	15.076	13.3532	15.0703	13.2154	12.9581	14.702
SEC61A1	B4DR61;P61619;P61619-3	0.231526	-0.875342	14.4495	13.3779	14.4553	14.3547	14.9415	10.3605
ANAPC1	H0Y564;Q9H1A4	1.42531	-0.878159	10.1878	11.0988	10.6009	9.54074	9.78251	9.92971
SAAL1	Q96ER3	0.39021	-0.87854	11.5233	10.3271	11.0039	10.4222	11.3993	8.39717
SEPTIN2	C9IZU3;C9J938;C9JB25;C9JQJ4;Q15019;Q15019-2;Q15019-3	0.499821	-0.879055	12.5917	10.2739	12.5119	10.89	10.7275	11.1228
UBE2A	A0A0D9SEZ6;A0A0D9SG71;P49459	0.570683	-0.881161	14.9855	14.3249	14.4683	14.4158	14.32	12.3994
UQCRH	P07919	2.08619	-0.881592	14.1994	14.1588	14.215	13.397	13.5683	12.963
ZC3HAV1	A0A7P0T8C6;Q7Z2W4	1.73146	-0.891801	12.4411	13.202	12.6185	11.7906	11.8947	11.9009
NOL3	H3BM67;H3BUN4;H3BUP2;O60936;O60936-3	1.15608	-0.892896	13.7997	13.89	13.2329	13.3116	12.2913	12.641
GAPVD1	F8W9S7;Q14C86;Q14C86-2;Q14C86-3;Q14C86-4;Q14C86-5;Q14C86-6	1.11193	-0.893848	12.4909	13.1026	12.7918	11.3357	11.8753	12.4927
SEC31A	D6REX3;D6RHZ5;H0Y8V7;H0Y9K1;H0YAB3;H7BXG7;O94979;O94979-10;O94979-2;O94979-3;O94979-4;O94979-6;O94979-7;O94979-8;O94979-9	1.23983	-0.895359	10.5596	11.3984	10.8444	10.2751	9.57245	10.2687
SMAD2	B7Z5N5;K7EJX0;K7EL92;K7ERC7;K7ESI8;Q15796;Q15796-2	0.417665	-0.896811	12.4683	12.8768	10.6341	9.98107	11.2681	12.0395
MID1IP1	Q9NPA3	0.678062	-0.899083	14.3749	15.5815	14.2372	13.8788	13.0738	14.5437
S100A4	P26447	0.248042	-0.900513	12.5585	10.5775	12.8357	11.9158	12.7186	8.63584
NCAPG	Q9BPX3	1.3108	-0.905112	13.0709	13.4504	12.8839	12.6511	11.7071	12.3317
TLN1	Q9Y490	0.35106	-0.906109	10.9423	11.677	10.9645	8.90708	9.62193	12.3364
MAPKAPK3;PRKY;MAPKAPK2;MAPKAPK2;PRKX;MAPKAPK3;TSSK3	C9J8E1;O43930;P49137;P49137-2;P51817;Q16644;Q96PN8	0.498157	-0.91329	12.1975	13.5929	12.8911	12.9415	10.6381	12.362
PSMD5	F2Z3J2;Q16401;Q16401-2	0.370416	-0.918162	11.956	9.14058	11.9712	9.60488	10.9752	9.73322
MRPS28	E5RFH3;E5RGC7;H0YAT2;Q9Y2Q9	1.15395	-0.919098	11.3772	11.3611	11.5969	10.1851	11.2588	10.1339
CDC37	K7EQA9;Q16543	0.667397	-0.919507	13.4579	12.826	13.1842	13.014	11.062	12.6335
HNRNPA0	Q13151	0.938742	-0.922435	15.0547	13.8437	13.5906	13.1682	13.4081	13.1456
CPSF1	Q10570	0.992104	-0.922551	11.9506	13.051	11.8285	10.967	11.4794	11.616
RAB5C	P51148;P51148-2	0.751305	-0.923583	13.9919	13.1704	13.0387	12.5332	13.2777	11.6193
PRKAR1A	P10644	3.21521	-0.923832	12.2271	11.923	12.0121	11.185	11.1013	11.1045
FXR1	P51114;P51114-2	1.61425	-0.924562	13.3088	13.9365	13.3926	12.9671	12.4276	12.4694
UQCR10	Q9UDW1	0.663582	-0.925602	15.5762	15.1234	14.2828	14.2173	14.861	13.1273
UBE2C	O00762	0.267526	-0.931202	13.1148	13.8786	13.0098	13.3708	9.70931	14.1295
GON7	Q9BXV9	0.620992	-0.935903	12.1844	11.3076	10.5195	11.3518	10.0036	9.84841
DFFA	O00273;O00273-2	0.869628	-0.938847	11.917	11.9197	12.5879	11.5548	11.7441	10.3092
COMT	P21964;P21964-2	0.904162	-0.940154	11.8615	12.6163	11.4317	10.6387	11.7067	10.7437
GLRX	P35754	0.879106	-0.942432	13.0091	13.852	12.989	12.6512	12.8437	11.5278
CYC1	P08574	2.34293	-0.950513	14.6787	14.6392	14.4685	13.3437	13.757	13.8341
DPYSL3	Q14195;Q14195-2	0.688382	-0.952886	10.1384	10.177	10.1985	10.3081	8.12665	9.22049
NSUN2	Q08J23;Q08J23-2	0.189854	-0.956534	14.1762	13.4872	13.7146	9.2384	15.7854	13.4846
NHLRC2	Q8NBF2;Q8NBF2-2	1.73528	-0.95679	13.8532	14.2722	13.5706	12.9011	13.2072	12.7173
RNH1	P13489	2.10003	-0.957045	13.3825	12.8122	13.2593	12.3691	12.1329	12.0809
VARS1	P26640	0.944797	-0.958858	14.2428	15.0013	14.2765	12.9631	13.3546	14.3263
SHCBP1	Q8NEM2	0.435809	-0.963038	11.8382	9.37025	9.08689	8.49253	9.15811	9.75556
TFRC	P02786	2.10405	-0.966344	14.5117	14.1368	14.2991	13.1333	13.6694	13.2459
TBCB	A0A494C0X0;K7EK42;Q99426	1.17669	-0.970288	10.417	9.74987	10.7884	9.79708	8.97259	9.27481
HEXB	P07686	0.989738	-0.971843	11.8183	12.682	11.8283	11.4524	10.4183	11.5424
PRDX6	P30041	2.94812	-0.972961	16.5914	16.5673	16.421	15.7455	15.3895	15.5257
FARS2	A0A3B3ITR6;O95363	1.4757	-0.974296	12.982	13.285	12.9077	12.2184	12.4937	11.5396
CPOX	P36551	2.48273	-0.976474	16.0422	16.3443	15.931	14.9867	15.093	15.3084
CAPN2	P17655	2.85984	-0.977082	13.395	13.2378	13.0041	12.1645	12.213	12.3281
CARMIL1	Q5VZK9;Q5VZK9-2	1.94891	-0.977238	12.5628	12.6682	12.3284	11.1909	11.8657	11.571
SMG9	Q9H0W8;Q9H0W8-2	0.547224	-0.979924	13.2652	14.4237	12.873	11.4328	12.537	13.6524
PPIL1	Q9Y3C6	0.57575	-0.980083	13.7578	14.5626	13.7933	12.6799	12.0595	14.434
ZC3H15	Q8WU90	0.578445	-0.981239	12.4904	11.834	11.9343	9.65083	11.8824	11.7818
ATP6V1H	G3V126;Q9UI12;Q9UI12-2	0.705861	-0.987932	9.87106	10.068	10.2624	10.1434	9.12699	7.96718
RPS28	P62857	0.270181	-0.988598	14.8105	16.3062	16.2542	15.4914	12.1413	16.7724
ATG9A	H7C1G6;Q7Z3C6;Q7Z3C6-2	0.415716	-0.988775	11.8667	9.84956	11.7443	8.70009	11.3283	10.4658
ZNF300;ZNF449;ZNF300;ZNF300;ZNF300;ZNF300	A0A0A0MS50;Q6P9G9;Q96RE9;Q96RE9-2;Q96RE9-3;Q96RE9-4	0.256837	-0.989322	13.9435	11.9336	13.9331	12.28	9.89365	14.6684
MT2A;MT1E;MT1G;MT1G;MT1X;MT1M	P02795;P04732;P13640;P13640-2;P80297;Q8N339	0.751941	-0.992898	15.4756	16.0043	15.4811	15.0127	13.5262	15.4435
ATP1A1	P05023;P05023-3;P05023-4	1.54868	-1.0016	14.0417	14.6874	13.8871	12.8701	13.3189	13.4223
ANAPC10	Q9UM13	1.62441	-1.00197	13.6688	14.5526	14.1074	13.2036	12.8687	13.2507
ATP5MF-PTCD1;ATP5MF;ATP5MF-PTCD1;ATP5MF;ATP5MF;ATP5MF;ATP5MF	C9JJT5;C9JU26;G3V325;P56134;P56134-2;P56134-3;P56134-4	1.07468	-1.00833	14.7344	15.6741	14.8401	13.6481	13.8608	14.7146
EXOSC10	Q01780;Q01780-2	0.902816	-1.01021	12.6424	12.6648	13.3303	11.5707	12.7915	11.2447
HCCS	P53701	1.8948	-1.01994	13.5728	13.3312	12.8842	12.4884	12.1675	12.0725
NUP160	E9PR16;G3V198;Q12769	0.276246	-1.02146	11.8124	9.34535	11.6436	7.87035	12.1939	9.67271
EPRS1	P07814	3.26378	-1.0265	15.4238	15.1405	15.2493	14.1679	14.3621	14.204
BRAP	J3KNN7;Q7Z569;Q7Z569-2	1.12426	-1.03236	11.0549	9.89388	9.71026	9.02164	9.18526	9.35511
LARS1	A0A6I8PIP7;A0A6I8PIT3;A0A6I8PIV1;A0A6I8PL42;A0A6I8PLB3;A0A6I8PLB8;A0A6I8PRS0;A0A6I8PS05;B4DER1;Q9P2J5;Q9P2J5-2	0.51507	-1.0363	10.6952	12.197	11.0961	9.78839	9.30414	11.7868
ERI3	A0A3B3ISV9;F6QUN3;F6UGJ8;H0Y4B0;O43414;O43414-2;O43414-3	1.01747	-1.03665	12.4204	11.7374	12.4703	10.4425	11.1936	11.8821
CSTF1	Q05048	0.74331	-1.03673	12.1977	13.6328	12.9038	11.2776	11.5049	12.8416
AKAP12	Q02952;Q02952-2;Q02952-3	0.782946	-1.037	14.2858	13.3527	13.9892	13.2107	13.541	11.765
ELOVL1	Q9BW60;Q9BW60-2	2.99626	-1.03701	11.5992	11.7472	11.8019	10.4708	10.7965	10.77
RNF126	K7EIY6;Q9BV68;U3KQF4	0.529461	-1.03838	13.351	12.5955	13.0993	10.3102	12.7339	12.8865
A2ML1	A8K2U0	0.170586	-1.03843	16.0399	9.68717	12.2631	13.203	12.7873	8.88469
STRAP	Q9Y3F4;Q9Y3F4-2	0.526797	-1.04064	14.1749	14.2391	13.9982	11.3644	13.9527	13.9732
NOMO1;NOMO1;NOMO1;NOMO1;NOMO3;NOMO3;NOMO3;NOMO3;NOMO3;NOMO3;NOMO3;NOMO1;NOMO2;NOMO2;NOMO2	A0A087WW46;A0A087X117;A0A0G2JN29;A0A0G2JP90;A0A7I2V2Z5;A0A7I2V3P4;A0A7I2V4D7;A0A7I2V4T6;A0A7I2V6B0;J3KN36;P69849;Q15155;Q5JPE7;Q5JPE7-2;Q5JPE7-3	0.517158	-1.04547	13.3439	11.9942	12.8935	10.1911	12.8827	12.0214
ACSL3	A0A7P0T8L6;A0A7P0TA76;A0A7P0TBB1;O95573	1.53534	-1.04787	14.565	13.8534	14.3701	13.0957	13.6638	12.8854
CTPS2	Q9NRF8	0.910188	-1.04918	13.3331	13.4659	13.5577	12.4037	11.4776	13.3278
NOC4L	F5H303;Q9BVI4	0.592641	-1.06001	11.3055	11.0165	11.693	11.7823	9.20189	9.85071
RANGAP1	P46060	0.628374	-1.06146	11.9005	13.8873	12.1431	10.9015	11.4609	12.384
CACUL1	Q86Y37	0.521199	-1.06147	10.8461	12.0252	10.9773	10.3224	8.76493	11.5768
FPGS	Q05932;Q05932-2;Q05932-3;Q05932-4;Q5JU20;Q5JU21;Q5JU23	1.35096	-1.06738	10.6438	11.6713	10.9596	10.4257	9.71653	9.93036
MALT1	Q9UDY8;Q9UDY8-2	1.50262	-1.06779	12.9392	12.8702	12.5726	12.2813	11.6835	11.2138
CPSF6	F8WJN3;Q16630;Q16630-2;Q16630-3	0.79197	-1.0682	14.8716	13.8995	13.9198	14.2293	12.6573	12.5998
KPNA3	O00505	0.523257	-1.07246	11.144	11.6594	12.4042	11.0571	11.8513	9.08174
KRT77	Q7Z794	0.341219	-1.07403	15.1329	14.4363	11.8903	13.4345	13.7494	11.0534
SF1	H7C0N4	2.10132	-1.0852	13.8057	14.1612	13.8096	13.0111	12.468	13.0417
IBA57	Q5T440	1.56497	-1.08747	14.0849	14.9984	14.3989	13.3281	13.1517	13.74
ATP5F1A	P25705;P25705-2	1.44912	-1.09627	15.6294	15.7198	15.9556	13.9982	14.9672	15.0505
CDK5RAP1	Q96SZ6;Q96SZ6-2;Q96SZ6-3	0.47456	-1.0992	11.6851	12.2645	11.4121	10.9626	8.88312	12.2184
TMPO	G5E972;P42167	0.433334	-1.10012	11.6244	8.52364	11.7004	10.0594	9.43651	9.05209
YWHAG	P61981	0.22864	-1.1017	14.3109	11.0354	13.3862	13.4281	13.4217	8.57764
NUP188	Q5SRE5;Q5SRE5-2	1.50905	-1.10446	11.1815	10.269	10.6984	10.0252	9.4886	9.32174
EMD	P50402;Q5HY57	3.04964	-1.10711	15.3819	15.2819	15.6281	14.4521	14.31	14.2085
ASNS	P08243;P08243-2	2.72471	-1.1079	15.0246	15.2496	15.1287	14.1656	13.7515	14.162
LRBA	A0A494BZW2;A0A494C1L5;E9PEM5;H0YAC6;P50851;P50851-2	1.68681	-1.1139	12.2384	11.8077	12.1216	10.6305	10.7138	11.4816
ACTR8	Q9H981	2.42455	-1.11852	14.4243	13.9701	13.9942	13.1201	12.7883	13.1245
TRIM72	Q6ZMU5	1.5066	-1.12774	10.0975	10.5142	11.1524	9.71583	9.5005	9.16449
NPEPPS	A0A7I2V389;A0A7I2V3W8;E9PLK3;P55786;P55786-2	0.511699	-1.13049	13.9877	14.4214	14.6888	13.7898	11.3909	14.5258
ACADVL	P49748;P49748-2;P49748-3	0.563614	-1.13169	10.9668	12.1139	9.75847	9.10937	9.37741	10.9574
CORO7-PAM16;PAM16;PAM16;PAM16;PAM16;CORO7;PAM16	A0A0A6YYL4;A0A0B4J298;I3L0X9;I3L1U7;I3L3T0;P57737-3;Q9Y3D7	0.53031	-1.13322	11.5986	9.60397	10.1003	8.71753	10.7432	8.44249
PDRG1	Q9NUG6	1.23265	-1.1355	11.3176	12.3206	11.5525	11.0939	10.0297	10.6605
NUP107	P57740	2.11399	-1.13724	12.5471	12.9707	12.288	11.6767	11.2876	11.4299
ZNF326	A0A0A0MRN4;E2QRN4;Q5BKZ1;Q5BKZ1-2	1.72886	-1.14145	13.2454	13.6007	12.9301	11.6968	12.1802	12.4749
UQCRC2	H3BRG4;P22695	0.984326	-1.14561	11.5961	11.0293	11.1411	9.16292	10.2225	10.9443
LIMD1	C9JRJ5;Q9UGP4	1.89224	-1.14657	12.9084	12.7673	12.4454	11.9676	11.5422	11.1715
FUS	H3BPE7;P35637;P35637-2	0.768773	-1.15457	12.4415	11.1433	11.439	11.0938	11.0843	9.38192
NEK9	A0A7I2V454;A0A7I2V5R1;Q8TD19	1.16425	-1.16087	10.8308	10.8075	10.2035	10.2623	9.25305	8.84383
PSMC3IP	K7EQS1;Q9P2W1;Q9P2W1-2	0.915512	-1.19731	14.2783	13.9391	13.4381	12.4199	11.8804	13.7633
NSL1	Q96IY1	1.44167	-1.20654	12.5275	12.653	12.6324	11.5943	10.651	11.9479
MRPL39	C9JG87;Q9NYK5;Q9NYK5-2	1.02448	-1.20701	13.839	14.744	13.9309	12.4715	12.5124	13.909
NARS1	O43776	2.47832	-1.21197	12.3767	12.3247	12.5207	11.5194	11.1864	10.8803
ATXN2	A0A2R8Y5A6;A0A2R8Y7E6;A0A2R8Y7P6;A0A2R8YDM9;A0A5F9ZHH4;A0A5F9ZHW5;A0A5F9ZHX3;A0A5F9ZI57;F8VQP2;F8VRK6;F8W0B5;F8WB06;H0YH87;Q99700;Q99700-2;Q99700-4;Q99700-5;V9GY86	1.01685	-1.21232	12.7573	11.7227	12.0339	11.1889	11.6301	10.0578
PIK3CB	P42338	0.644208	-1.21478	12.1083	12.4762	11.8238	9.68041	10.5859	12.4976
FBXL18	H0Y6I6;Q96ME1;Q96ME1-2;Q96ME1-4	0.713914	-1.2281	11.9229	12.7378	11.5041	11.4086	11.6342	9.43764
NUP88	I3L245;J3KMX1;Q99567	0.558612	-1.23205	11.042	8.83318	11.1067	9.66988	7.83458	9.7812
LDB1;LDB2;LDB2;LDB2;LDB2;LDB2;LDB2;LDB1;LDB1;LDB1	A0A6E1WJ75;E9PFI4;G5E9Y7;H0YA09;O43679;O43679-2;O43679-3;Q86U70;Q86U70-2;Q86U70-3	0.571802	-1.24999	10.3836	13.4297	11.3936	10.6914	9.75184	11.0137
MRPL44	Q9H9J2	1.12989	-1.25143	11.4448	10.5681	11.2747	10.4923	10.0524	8.98856
RANBP9	Q96S59;Q96S59-2;Q96S59-3	0.730201	-1.25262	10.8075	13.1299	10.9309	10.4655	9.9509	10.694
NCAPD3	E9PKK4;G3V1A9;P42695	1.00727	-1.25351	10.7802	9.28935	10.742	9.51875	8.43201	9.10029
ACOT11	Q8WXI4;Q8WXI4-2	0.572153	-1.25761	11.262	13.3878	12.1243	11.2531	9.57884	12.1694
PPME1	Q9Y570;Q9Y570-4	0.810291	-1.2608	12.8467	12.9899	12.0946	10.5082	10.9544	12.6861
POLR1C	A0A2R8Y5D3;A0A2R8YEY5;A0A2R8YEZ4;O15160;O15160-2	2.28165	-1.26387	12.2586	12.2965	11.9781	10.5085	11.1738	11.0592
ILVBL	A1L0T0;M0R026	0.826582	-1.26535	12.4774	13.5729	12.5072	11.8069	10.4359	12.5186
;ATP5MG;ATP5MG	A0A3B3ITX4;E9PN17;O75964	1.36933	-1.26569	14.8462	13.7032	13.9797	12.4144	13.2955	13.0221
NDC1	Q9BTX1;Q9BTX1-2;Q9BTX1-4;Q9BTX1-5;Q9BTX1-6	1.33407	-1.26724	11.256	10.1098	9.95127	9.46515	8.8796	9.1706
VASP	P50552	0.624969	-1.27471	11.0759	11.7361	11.256	10.3776	11.4642	8.40208
PSMB1	P20618	0.747101	-1.27892	10.3695	10.323	10.9531	10.6756	8.0693	9.06404
AAR2	A0A7P0T8J7;A0A7P0TA70;A2A2Q9;Q9Y312	0.858237	-1.2843	10.5791	12.1726	10.2155	9.01636	9.93616	10.1617
USP48	Q86UV5;Q86UV5-2;Q86UV5-3;Q86UV5-4;Q86UV5-7;Q86UV5-8	2.08727	-1.28812	10.6141	10.074	10.7239	8.83969	9.34316	9.36471
LETM1	O95202	0.626993	-1.29423	11.8337	9.75223	11.8862	10.1733	10.7259	8.69019
VANGL1	Q8TAA9;Q8TAA9-2	1.31541	-1.30086	14.4782	14.1693	14.3067	12.3589	13.889	12.8037
SLC7A5	Q01650	2.32028	-1.30098	14.2957	13.9777	14.2804	13.1005	12.474	13.0764
RPA1	P27694	1.82459	-1.30994	13.2025	13.7716	13.4512	12.4962	12.3793	11.62
NRGN	Q92686	0.5667	-1.31199	15.3939	14.4192	15.1021	15.1321	14.063	11.7841
TANC1	Q9C0D5;Q9C0D5-2	0.597732	-1.31766	11.4065	10.7034	11.4537	9.58918	8.37283	11.6485
ACSL5	Q9ULC5;Q9ULC5-3	1.07552	-1.3228	14.0485	13.7871	14.0867	12.1994	11.97	13.7844
PRKAG1	F8VPF5;F8VYY9;P54619;P54619-2;P54619-3	1.46211	-1.32403	11.0036	11.0497	10.6545	9.54197	10.2913	8.90241
DHX38	Q92620	1.29616	-1.32928	10.8676	9.55202	10.5242	9.53131	8.77491	8.64977
EEF1D	A0A087X1X7;E9PI39;E9PIZ1;E9PK01;E9PL12;E9PL71;E9PMW7;E9PN91;E9PPR1;E9PQ49;E9PRY8;H0YCK7;P29692;P29692-2;P29692-3	0.978436	-1.33745	12.7565	13.1292	12.6763	11.166	10.6524	12.7313
CASK	A0A2R8YE77;A0A2R8YEK3;A0A2R8YFN5;A0A2U3TZM1;A0A2U3TZM4;A0A2U3TZN6;A0A7I2RJN6;O14936;O14936-2;O14936-3;O14936-4;O14936-6;Q5JS79	0.984548	-1.34222	12.2641	10.3485	11.5027	9.9002	9.56277	10.6256
LRSAM1	A0A6Q8PFL5;A0A6Q8PFT9;A0A6Q8PG02;A0A6Q8PGB2;A0A6Q8PGF7;A0A6Q8PGT8;A0A6Q8PGW1;Q6UWE0;Q6UWE0-2;Q6UWE0-3	0.86829	-1.34462	11.978	9.93243	11.551	9.14332	10.3882	9.89607
;NDUFA9;NDUFA9	A0A3B3ISG8;F5GY40;Q16795	0.99086	-1.34747	11.098	11.0162	11.3274	8.53889	10.3914	10.469
TRIM5	A0A804HHS7;Q9C035;Q9C035-2;Q9C035-3;Q9C035-4	0.392757	-1.35878	12.1799	10.795	10.2442	12.0891	7.44372	9.60994
PDLIM5	Q96HC4	3.15283	-1.3608	15.9556	15.595	15.7342	14.5454	14.4454	14.2117
NAA40	F5H2C9;Q86UY6;Q86UY6-3	1.59406	-1.36177	11.9129	11.8629	12.2593	11.2352	9.96089	10.7536
NUP133	Q8WUM0	2.24153	-1.37012	14.4043	14.6261	14.6314	12.6981	13.4397	13.4137
EXOSC5	M0R050;Q9NQT4	0.600465	-1.37332	11.2604	11.9082	11.7397	9.75106	8.83471	12.2026
PPP4R2	C9IZ04;Q9NY27	0.765816	-1.37528	14.2872	14.5428	13.7474	12.8773	11.4152	14.1589
TRIM33	H0Y612;Q9UPN9;Q9UPN9-2	0.602333	-1.38117	11.8274	9.73079	11.8197	11.0967	9.64604	8.49161
SMCHD1	A6NHR9;A6NHR9-2;J3KTL8	0.445806	-1.38443	11.2975	11.3777	10.6429	10.6121	11.4184	7.13428
UBE3A	A0A0D9SG77;A0A1B0GVL3;A0A6Q8PHE5;Q05086;Q05086-2;Q05086-3	3.65914	-1.39051	13.2535	13.237	13.4147	12.0614	11.74	11.9323
SFXN1	Q9H9B4	0.673421	-1.39374	12.0676	13.4135	12.0494	9.78399	10.9433	12.6221
MLST8	Q9BVC4;Q9BVC4-5	1.35505	-1.39672	13.0384	13.5815	12.3675	11.4841	11.094	12.2192
GATD1	E9PLI5;E9PQD8;H0YE25;H0YF25;Q8NB37;Q8NB37-2	1.28922	-1.39757	12.2067	12.2213	11.9772	11.4616	9.77306	10.9779
JCHAIN	C9JA05;D6RD17;D6RHJ6;P01591	0.56006	-1.40271	11.2564	14.0478	11.503	9.55121	11.6603	11.3874
PSMD3	O43242;O43242-2	1.02836	-1.406	12.7727	13.304	12.4734	10.428	11.418	12.4861
OAS3	A0A7P0T9J0;A0A7P0T9W6;A0A7P0TAU8;A0A7P0Z4D0;A0A7P0Z4F1;Q9Y6K5	2.51294	-1.41298	13.4858	12.9536	13.2249	11.57	12.1093	11.7461
SRRT	A0A0A0MSP6;H7C3A1;Q9BXP5;Q9BXP5-2;Q9BXP5-3;Q9BXP5-4;Q9BXP5-5	0.7157	-1.41736	10.2817	11.7178	9.46364	9.46153	9.89508	7.85445
IGHA2;IGHA1;IGHA1	A0A0G2JMB2;A0A286YEY1;P01876	0.402589	-1.42477	13.4447	15.1465	12.8239	14.0301	13.3596	9.75114
KRT84	Q9NSB2	1.2548	-1.43567	11.3856	11.0122	11.8766	10.1244	10.7361	9.10688
KLF16	Q9BXK1	0.986336	-1.4381	11.2203	11.1807	10.2767	9.90093	10.2147	8.24772
RTN4	F8W914;Q9NQC3-2	1.28473	-1.44154	11.8902	11.4821	11.6349	11.1096	9.33436	10.2386
SLPI	P03973	0.406469	-1.44323	9.81089	14.267	10.1272	10.7182	10.0148	9.14226
DECR2	Q4VXZ8;Q9NUI1	2.0941	-1.44674	13.4031	14.1747	13.3832	12.2663	11.9421	12.4125
ERI1	Q8IV48	1.01347	-1.45622	13.1581	14.4397	13.5922	12.0155	11.4599	13.3459
KRTAP1-1;KRTAP1-3	Q07627;Q8IUG1	1.14699	-1.46171	11.1995	10.9707	12.1839	9.93314	9.20578	10.83
RBBP7	E9PC52;Q16576	0.577703	-1.46412	13.042	14.2764	13.3082	11.5015	10.5909	14.1418
UPP1	Q16831	1.42079	-1.46883	13.1333	12.6011	11.9582	10.4239	11.5331	11.329
ADA	P00813	0.752061	-1.47122	13.4277	14.7512	13.3442	13.1729	10.8208	13.1156
SRP14	P37108	1.08446	-1.47261	15.4097	16.4969	15.0594	13.9094	13.5417	15.097
PELP1	C9JFV4;I3L1P4;I3L445;I3L4M7;Q8IZL8	1.98901	-1.4736	11.9688	12.0736	11.8326	10.1047	11.1094	10.2401
UMPS	E9PFD2;F2Z303;F2Z3P2;F8WDG4;P11172	0.819245	-1.48036	12.1521	10.6791	11.3935	10.8845	10.3834	8.51576
SRP9	P49458	0.734704	-1.48163	14.7806	13.1073	13.7563	12.8213	13.4998	10.8783
RBFOX1;RBFOX2;RBFOX2;RBFOX1;RBFOX3;RBFOX1;RBFOX1;RBFOX1;RBFOX1;RBFOX1;RBFOX1;RBFOX3;RBFOX3;RBFOX2;RBFOX2;RBFOX2;RBFOX2;RBFOX1;RBFOX1;RBFOX1;RBFOX1;RBFOX1;RBFOX1;RBFOX1;RBFOX3;RBFOX3;RBFOX2;RBFOX2;RBFOX2;RBFOX2;RBFOX2;RBFOX2;RBFOX2;RBFOX2;RBFOX2;RBFOX1;RBFOX1;RBFOX1;RBFOX1;RBFOX1;RBFOX2	A0A087X2B1;A0A0G2JRA5;A0A0G2JSB3;A0A286YEU2;A0A3B3ITL7;A0A6Q8PFM4;A0A6Q8PGE0;A0A6Q8PH77;A0A6Q8PHA3;A0A804HJM2;A0A804HKG7;A6NFN3;A6NFN3-2;B0QYV1;B0QYY4;B0QYY6;B0QYY7;B7Z1U7;F5H0M1;F8VR27;F8VZG9;F8VZY7;I3L1D4;J3KNW3;J3QQZ2;J3QRF4;O43251;O43251-10;O43251-2;O43251-4;O43251-5;O43251-6;O43251-7;O43251-8;O43251-9;Q9NWB1;Q9NWB1-2;Q9NWB1-3;Q9NWB1-4;Q9NWB1-5;S4R469	0.873346	-1.4891	13.3306	13.06	13.6468	12.1794	13.0088	10.3818
THNSL1	Q8IYQ7	0.675387	-1.50851	12.7301	10.5146	13.0779	9.39448	10.9465	11.456
PKN1	K7EKY9;K7EM57;Q16512;Q16512-2;Q16512-3	0.644993	-1.51205	12.2775	12.3673	12.0959	11.7778	8.62323	11.8035
PYCR2;;PYCR2	A0A087WTV6;J3KR12;Q96C36	0.79037	-1.52444	11.6013	13.7921	12.2374	10.2359	10.6058	12.2158
VIRMA	Q69YN4;Q69YN4-2;Q69YN4-3;Q69YN4-4	1.03576	-1.54831	10.6379	10.6787	12.1735	8.91653	10.5534	9.37531
ID1	P41134	0.973014	-1.55402	12.9388	13.3299	12.5072	12.0426	12.1185	9.95286
PDK2	D6R983;D6RDN9;D6RGV8;D6RHG2;D6RJH7;Q15119;Q15119-2	0.76065	-1.57622	11.6767	13.2461	12.061	9.89439	9.95365	12.4071
TIA1;TIA1;TIA1;TIA1;TIA1;TIAL1;TIAL1	C9JTN7;F8W8I6;F8WE16;P31483;P31483-2;Q01085;Q01085-2	0.98545	-1.58222	9.14639	11.2902	9.85376	8.95382	7.69365	8.89626
MRPL10	Q7Z7H8;Q7Z7H8-2	1.16651	-1.58248	11.0571	11.8123	11.3041	9.24518	9.17709	11.0039
KRT33B	Q14525	1.48597	-1.58441	15.6948	14.368	15.5867	14.0504	13.1824	13.6634
HMGA1	P17096-2	0.438332	-1.5887	15.0131	12.7879	10.3227	9.97933	12.5651	10.8132
RIPK2	O43353;O43353-2	1.09211	-1.59467	12.1323	12.1297	11.3586	10.6304	9.04368	11.1626
TRAF2	Q12933;Q12933-2;Q12933-3;Q12933-4	1.12902	-1.60269	11.6726	12.8305	12.2054	10.2521	9.87976	11.7687
DPM1	H0Y368;O60762;Q5QPK2	1.88013	-1.62175	13.5902	13.2829	13.2711	11.4404	12.492	11.3465
NELFE	A0A0A0MSN9;A0A0A0MT02;A0A0G2JI50;A2ABK4;E9PD43;P18615;P18615-3;P18615-4	0.916391	-1.62563	11.9749	10.2575	9.47833	9.53564	8.24256	9.0556
SNUPN	H3BQR0;H3BRI5;H3BSK1;H3BTA6;O95149	1.27527	-1.62831	10.8224	12.6333	11.4649	9.96017	10.5186	9.5569
DSG1	Q02413-2	1.35269	-1.63351	12.1976	12.9844	12.9153	10.6679	10.4598	12.0691
SCD	O00767	1.59464	-1.63499	13.2235	13.0144	12.7838	10.4766	11.7039	11.9363
C1QBP	I3L3B0;I3L3Q7;Q07021	1.11484	-1.65062	12.217	11.9061	11.8766	11.2981	10.7372	9.01254
ZG16B	A0A0C4DGN4;Q96DA0	0.368404	-1.65432	10.8036	15.4733	9.65008	10.2891	11.3736	9.30134
PITRM1	A0A7I2V3B6;A0A7I2V5C6;A0A7I2V5H2;A0A7I2YQT2;A0A7I2YQX5;Q5JRX3;Q5JRX3-2	0.80107	-1.6692	12.5437	13.4878	12.1697	11.9058	11.9821	9.30582
SYPL1	C9JYN0;Q16563;Q16563-2	1.58269	-1.69062	14.7466	13.8841	14.7173	12.5251	13.5397	12.2113
APEX1	G3V3M6;G3V5Q1;P27695	1.87693	-1.70403	11.0974	11.8369	11.0167	9.65696	10.1192	9.06279
DLST	P36957;P36957-2	3.26164	-1.71772	13.959	14.1662	13.7858	12.0619	12.5021	12.1938
SLC1A5	Q15758	0.844009	-1.7306	12.8451	10.8032	12.6502	11.3372	10.7483	9.02125
PSMG1	F8WBH7;O95456;O95456-2	0.500826	-1.73409	11.0845	13.4122	13.0343	10.6202	8.55464	13.1538
SNAP23	H3BM38;H3BNE1;H3BPJ0;H3BR18;O00161;O00161-2	0.983512	-1.74137	12.3162	11.4225	12.2311	11.0882	10.9665	8.69101
PSME3IP1	H3BMX9;H3BP64;H3BQQ6;H3BSY6;H3BTI2;H3BTP8;H3BU93;H3BUL4;Q9GZU8	1.59716	-1.76482	11.5543	10.0486	11.2525	9.04761	8.90873	9.60461
EIF2B3	Q9NR50;Q9NR50-2;Q9NR50-3	0.707582	-1.77529	12.134	11.7419	11.6066	7.78348	11.1969	11.1762
TMEM33	P57088	0.636298	-1.78628	13.9085	13.9491	13.4426	12.777	13.6443	9.52008
ANKRD40	Q6AI12	0.338165	-1.78935	9.80628	13.8445	11.3205	8.46794	7.61708	13.5182
FERMT2	A0A0U1RRM8;H0YJ34;Q96AC1;Q96AC1-2;Q96AC1-3	1.68915	-1.81337	10.8625	11.4934	10.6014	8.43755	9.85158	9.22805
KRT86	O43790	1.16383	-1.81657	22.2307	20.5504	22.4141	20.2856	19.0532	20.4067
MPG	A2IDA3;P29372;P29372-2;P29372-4;P29372-5	0.881524	-1.83038	12.1118	13.4854	12.2957	9.20097	11.0249	12.1759
SDSL	H0YID3;Q96GA7	1.15947	-1.83732	10.5312	11.6519	10.3764	9.15976	7.86417	10.0236
AP1G1	B4DGE1;H3BN71;H3BNR4;H3BR36;H3BRM7;H3BUN9;O43747;O43747-2	1.4078	-1.84886	12.2654	10.9315	12.2625	10.7671	9.33639	9.80926
MRPS5	P82675	1.72258	-1.85072	11.4793	12.0683	11.8503	10.0436	10.6837	9.11847
CENPM	B1AHQ6;B1AHQ7;Q9NSP4;Q9NSP4-2;Q9NSP4-4	0.446485	-1.85191	13.8426	11.8565	13.4758	12.4972	13.2393	7.88254
KRT33A	O76009	1.26974	-1.87466	16.5238	14.5818	16.3792	14.3151	13.3595	14.1864
SPRYD4	Q8WW59	0.811773	-1.88939	12.684	12.5333	11.5061	11.0005	11.6868	8.36802
MOCOS	Q96EN8	1.33336	-1.89733	11.7854	13.1147	11.8668	9.43882	10.4431	11.1931
ITPRID2	E9PHV5;P28290;P28290-2;P28290-3	1.86674	-1.9159	14.5092	14.8758	13.8518	12.0241	13.1626	12.3025
TIMP4	Q99727	0.709691	-1.95932	14.4358	13.4806	14.9587	13.8696	10.0036	13.1239
SART3	A0A499FI31;Q15020;Q15020-2;Q15020-4	2.2487	-1.99316	11.5056	11.2182	11.2356	9.26923	8.7404	9.97034
VPS51	H0YDX9;H0YEE1;Q9UID3;Q9UID3-2	2.06872	-1.99524	10.9364	10.8562	11.31	8.67448	8.62427	9.81803
PAK4;PAK4;PAK4;PAK4;PAK6;PAK6;PAK5	O96013;O96013-2;O96013-3;O96013-4;Q9NQU5;Q9NQU5-2;Q9P286	1.05114	-1.99617	12.4372	13.2621	12.1557	9.2537	10.4982	12.1146
ATP5F1C	P36542;P36542-2	1.20394	-2.01464	13.7715	12.7471	13.5336	12.4381	9.97437	11.5958
TSNAX	Q99598	1.35886	-2.07189	12.276	13.3353	12.2277	10.9152	9.34111	11.367
ASRGL1	A0A087WUG3;E9PJK6;Q7L266	0.941538	-2.09275	13.0581	13.0423	12.3215	11.2895	8.74851	12.1056
TMLHE	Q9NVH6;Q9NVH6-5;Q9NVH6-6;Q9NVH6-7;Q9NVH6-8	0.485863	-2.09882	16.0983	16.0648	15.9222	15.7555	15.8608	10.1725
PCYT2	I3L102;I3L1L9;I3L1R7;I3L2Q1;Q99447;Q99447-3	1.25871	-2.11693	12.6922	12.69	11.7167	9.6036	9.45878	11.6858
ERRFI1	Q9UJM3	1.06838	-2.1934	14.431	14.5134	14.3075	13.2653	13.1065	10.2999
POLR1G	O15446;O15446-2	0.705251	-2.23303	14.1201	14.7704	13.9872	13.0309	9.25442	13.8934
BDH1	Q02338	1.81189	-2.23552	12.4258	12.5771	13.473	10.9837	9.70333	11.0823
GM2A	P17900	1.00403	-2.27124	12.4121	12.6613	9.61012	9.84008	9.54535	8.48436
NBDY	A0A0U1RRE5	0.622611	-2.52636	12.0152	14.5648	12.0752	8.31453	9.20398	13.5577
IRF2BPL	Q9H1B7	1.59161	-2.5557	12.2071	13.6072	11.277	10.347	9.35243	9.72483
KRTAP3-1	Q9BYR8	1.08234	-2.5798	14.8689	12.1099	14.384	12.4748	9.94734	11.2013
KRT81	A0A087X106;Q14533	1.76368	-2.60869	14.6708	12.671	14.6	11.575	11.3671	11.1736
KRT85	P78386	1.53621	-2.69709	15.9806	14.694	16.0244	14.1672	12.5846	11.8559
EFL1	Q7Z2Z2;Q7Z2Z2-2	0.400217	-2.70784	10.4512	10.0843	8.3363	9.81574	1.34082	9.5917
CYB5B	D6RFH4;H3BUX2;O43169	2.17382	-2.74277	13.1238	12.982	12.4464	10.5387	9.13031	10.655
KRTAP2-3;KRTAP2-4	P0C7H8;Q9BYR9	1.61513	-2.75121	14.8483	13.3111	15.7672	12.0893	11.2876	12.2961
NTPCR	Q5TDF0;Q9BSD7	1.85388	-2.82744	13.5244	13.9037	13.2066	9.47363	11.0306	11.6481
UBE2B	H0YA80;P63146	1.50063	-2.86923	14.1691	12.2989	13.1414	10.7932	8.9586	11.2499
ODC1	P11926	2.90785	-2.90699	13.7778	14.8264	13.953	11.0784	11.57	11.1879
KRT34	O76011	1.19705	-2.9518	15.5873	12.8957	15.4903	13.0853	11.538	10.4946
SNU13	A0A3B3IUA2;B1AHD1;P55769	1.47816	-3.10533	11.815	12.2464	14.7823	10.2913	9.96996	9.26659
RPL37	D6RG19;P61927	0.725481	-3.12399	13.2541	14.1686	13.6177	8.20603	9.02921	14.4332
ACAD9	A0A7P0T7Z1;A0A7P0T871;A0A7P0T8U3;A0A7P0TB58;H0Y8Z9;Q9H845;Q9H9W4	0.448604	-3.17629	9.17209	9.65452	9.41892	0.166322	9.62557	8.92477
KRTAP13-4	Q3LI77	0.922601	-3.18702	14.1369	9.77851	14.7213	10.2771	9.91101	8.88757
UBE2D3	A0A087WY85;D6RAH7;H9KV45;P61077;P61077-2;P61077-3	1.43292	-3.25191	13.3581	14.6104	13.2903	9.25995	9.84291	12.4001
ASB6	F6TX30;Q9NWX5;Q9NWX5-2	0.458218	-3.34636	9.49974	10.2712	9.32733	9.09745	9.86898	0.0927676
KRTAP13-1	Q8IUC0	1.45844	-3.49644	13.3162	11.3369	13.3208	9.42022	10.5675	7.49685
DDA1	Q9BW61	3.87968	-3.68452	15.0668	15.0707	15.219	11.0942	11.2885	11.9201
ANP32B	Q92688;Q92688-2	1.08911	-3.71116	15.9211	15.5045	15.0535	9.03642	14.5179	11.7915
PTGES3L-AARSD1;PTGES3L-AARSD1;AARSD1;AARSD1;AARSD1	B3KSP9;C9J5N1;Q9BTE6;Q9BTE6-2;Q9BTE6-3	0.446157	-3.78834	11.24	9.81976	11.9794	10.7004	10.9374	0.0363066
C11orf58;C11orf58;SMAP	E9PM92;E9PQA1;O00193	0.67279	-4.27934	12.3077	9.86802	11.8842	9.48969	10.2172	1.51508

## Sheet: CSA  vs WT
Gene names	Protein IDs	-Log t-test p value	t-test Difference	CSAmClover Intensity (Log2) experiment 1	CSAmClover Intensity (Log2) experiment 2	CSAmClover Intensity (Log2) experiment 3	WT Intensity (Log2) experiment 1	WT Intensity (Log2) experiment 2	WT Intensity (Log2) experiment 3
DDB1	Q16531	5.78486	7.35984	21.7216	21.3999	21.1825	14.009	14.199	14.0165
DDA1	Q9BW61	2.59321	6.33431	16.6318	15.5034	14.3689	9.12407	10.3645	8.01257
ERCC8	Q13216	2.58431	6.00496	19.6934	19.7973	19.2329	13.9465	14.8725	11.8897
COPS5	Q92905	4.5866	5.99344	14.2148	13.6905	13.346	7.58966	7.72623	7.95512
COPS4	Q9BT78	3.33725	5.93022	15.4601	15.6036	15.2289	8.41457	9.86747	10.2199
COPS7B	Q9H9Q2	2.4642	5.91109	14.9684	11.9351	14.2741	7.89748	7.33421	8.21252
CUL4A	Q13619	4.13044	5.84184	14.04	14.3221	13.4149	8.50733	7.75428	7.98983
COPS8	E9PGT6;Q99627	2.9421	5.5595	16.656	14.3986	15.9118	10.2259	10.1023	9.95963
COPS2	P61201;P61201-2	2.08288	5.39905	15.2523	15.3957	14.9551	7.60694	11.0841	10.7149
COPS7A	Q9UBW8	3.75927	5.25363	14.2565	13.6389	13.7803	9.2531	8.58761	8.07408
COPS3	Q9UNS2	4.28619	4.82589	16.6942	16.3425	16.0581	11.8246	11.6072	11.1853
GPS1	C9JFE4;Q13098;Q13098-5;Q13098-7	3.43922	4.75956	16.3323	16.1737	15.2425	10.749	11.6286	11.0922
RBX1	P62877	2.6071	4.52012	15.2121	14.0701	13.7585	8.94313	9.86573	10.6715
KRTAP1-1;KRTAP1-3	Q07627;Q8IUG1	0.46492	4.32121	20.732	7.90821	10.007	8.00799	9.79543	7.88013
COPS6	E7EM64;Q7L5N1	4.05491	4.27883	14.2752	14.2097	14.8515	10.1537	9.87586	10.4703
MRPL36	Q9P0J6	3.16461	4.19396	14.9253	13.896	13.6875	9.683	9.83738	10.4065
ZRANB2	O95218;O95218-2	2.23216	4.06852	14.2116	14.8853	12.5968	9.52808	10.5087	9.45146
CUL4B	A0A669KAX4;Q13620-1	3.89767	3.64821	15.3544	15.6731	15.0084	11.8244	11.3813	11.8855
KRTAP2-3;KRTAP2-4	P0C7H8;Q9BYR9	0.386593	3.64596	22.6875	12.1206	10.3072	12.1094	12.5301	9.53793
KRT31	Q15323	0.61623	3.56843	21.1616	14.691	12.5413	12.55	12.9694	12.1692
CCT4	P50991	4.20513	3.47532	18.7918	18.4086	18.1623	15.0756	15.0329	14.8283
ALOXE3	J3KPH2;Q9BYJ1;Q9BYJ1-2	2.64455	3.43579	14.2745	13.8182	15.0547	11.5567	10.3853	10.898
KRT77	Q7Z794	1.0597	3.41183	15.3398	14.1959	15.2954	8.82131	11.9192	13.8551
RPL37	D6RG19;P61927	3.06843	3.38662	13.3689	12.3485	13.2183	9.7974	9.18521	9.79323
CCT8	P50990	4.65983	3.38237	19.0456	18.681	18.5806	15.3197	15.368	15.4724
TIMP4	Q99727	0.483724	3.38127	21.4907	13.438	11.7854	11.4291	12.0044	13.1367
CCT5	P48643	4.48176	3.35695	17.7373	17.3293	17.2706	14.2276	14.0483	13.9906
CCT6A	P40227	3.5239	3.2114	17.8463	17.0108	17.116	14.2599	14.0619	14.0171
CCT3	P49368	3.88007	3.13692	18.5809	17.9529	17.9173	15.036	14.9735	15.0308
TCP1	P17987	4.5818	3.11705	18.5919	18.3202	18.1076	15.2731	15.2205	15.1749
CCT2	P78371	5.02313	3.10228	18.3767	18.276	18.0204	15.072	15.1758	15.1185
KRTAP11-1	Q8IUC1	0.52539	2.96419	16.8295	9.46977	9.36082	8.52194	8.95784	9.28776
CCT7	Q99832	4.52992	2.96304	18.2113	17.9025	17.7338	15.0023	14.982	14.9741
KRT33A	O76009	0.49612	2.89758	21.5402	15.4667	12.9972	13.9791	14.0215	13.3108
NOLC1	A0A0A0MRM9;Q14978;Q14978-2;Q14978-3	0.861275	2.79368	18.4129	13.897	13.9411	12.3276	12.6065	12.9359
HAS1	G3V1S7;M0QXH4;M0R2V0;Q92839	4.17579	2.7587	18.415	18.9114	18.6167	15.7519	15.9811	15.934
PDLIM5	Q96HC4	3.21459	2.58137	15.6416	16.3709	15.5987	13.1561	13.2721	13.4389
ZNF300;ZNF449;ZNF300;ZNF300;ZNF300;ZNF300	A0A0A0MS50;Q6P9G9;Q96RE9;Q96RE9-2;Q96RE9-3;Q96RE9-4	1.98357	2.5587	11.9917	13.6186	12.8105	10.1859	10.8108	9.74799
KRT36	O76013	0.614771	2.55835	17.6732	13.1293	11.5288	12.0846	10.9677	11.604
KRT86	O43790	0.449276	2.50184	26.7733	20.7867	18.8931	20.0399	19.8916	19.016
SUB1	P53999	1.28509	2.44597	15.3521	15.6713	13.0831	11.612	12.2838	12.8728
LRRC15	Q8TF66;Q8TF66-2	0.488707	2.39414	17.7128	11.4825	11.8586	12.4491	11.3753	10.047
KRT85	P78386	0.587256	2.38116	18.7571	14.9647	12.6743	13.3509	13.5314	12.3703
KRTAP13-2	Q52LG2	0.225511	2.35784	20.3615	8.70612	8.44561	12.1752	9.98138	8.28314
BLMH	Q13867	0.814928	2.33591	12.6134	15.8229	14.299	11.5138	13.7153	10.4985
CASP14	P31944	1.93388	2.26719	15.3984	14.7556	15.5503	13.6793	12.1251	13.0984
ALDH9A1	P49189;P49189-3	1.30137	2.17893	12.0912	13.5619	13.4134	11.6856	11.2338	9.61028
PSMB6	P28072	0.528977	2.15267	15.4578	13.5518	15.0392	15.1152	9.33656	13.139
HAL	P42357;P42357-2	1.56987	2.10436	11.8647	13.1373	13.3732	11.4727	10.4312	10.1582
PSMC3IP	K7EQS1;Q9P2W1;Q9P2W1-2	1.89832	2.10373	13.5863	13.6279	14.6747	11.207	12.0498	12.321
SRSF4	A0A0D9SEM4;Q08170	1.21911	2.06483	13.2178	12.4321	11.9409	11.8373	9.50866	10.0503
S100A9	P06702	0.946939	2.03791	13.7545	14.3271	12.2696	9.82023	12.3204	12.0968
SERPINB3	P29508	1.97091	1.98447	12.5918	13.7763	13.1705	11.747	10.9277	10.9106
PFDN1	E5RGS4;O60925	4.45958	1.95376	14.7262	14.6221	14.4598	12.7463	12.549	12.6516
HMGB1	P09429;Q5T7C4	0.385879	1.89529	13.4057	14.0739	8.11935	9.27352	8.96951	11.6701
MYOF	Q9NZM1-3	0.498038	1.88869	20.2081	21.2725	16.9624	16.8582	16.2922	19.6266
UBASH3B	Q8TF42	1.3841	1.84554	12.383	10.5455	11.0479	10.0225	9.40516	9.01206
ECM1	Q16610;Q16610-2;Q16610-4	1.0169	1.81953	13.6905	13.949	15.373	13.8234	11.996	11.7346
FERMT2	A0A0U1RRM8;H0YJ34;Q96AC1;Q96AC1-2;Q96AC1-3	1.72541	1.79804	11.2806	10.8929	11.3694	8.51312	10.0018	9.63388
NBDY	A0A0U1RRE5	0.623481	1.79612	13.6481	12.0313	12.713	12.4232	8.59867	11.9821
SERPINA12	Q8IW75	0.870383	1.75597	9.11441	11.2541	12.2104	9.41777	9.18611	8.70709
ERCC6	Q03468	0.521595	1.74654	14.6661	14.6866	14.3131	14.3961	14.1506	9.87948
KRT10	P13645	1.87802	1.74319	20.8364	21.6231	21.837	19.9259	19.1382	20.0027
KRT23	Q9C075	0.906044	1.7327	13.563	13.5698	15.3371	13.7047	12.121	11.4462
XP32	Q5T750	1.27771	1.70448	16.0711	16.8795	16.8988	16.0378	14.3223	14.3759
KRT27;KRT25	Q7Z3Y8;Q7Z3Z0	0.545667	1.64289	12.8735	10.9218	12.6075	8.25825	12.2824	10.9334
EMD	P50402;Q5HY57	0.531775	1.64167	19.0406	15.0124	14.9397	14.586	14.9235	14.5582
P4HB	A0A7P0T8C0;A0A7P0T8J3;A0A7P0T8X1;A0A7P0T9D6;A0A7P0T9U6;A0A7P0TA35;A0A7P0TA71;A0A7P0TA97;A0A7P0TB26;H0Y3Z3;H7BZ94;I3L0S0;I3L4M2;I3L514;P07237	0.778986	1.62932	12.6457	15.3333	12.3582	12.1752	11.6291	11.645
SRP9	P49458	0.613293	1.62917	13.16	16.4004	13.5825	11.5357	13.1296	13.5901
KRT33B	Q14525	0.475169	1.62269	17.7566	14.4647	12.7401	13.4412	13.612	13.0401
VBP1	P61758;P61758-2	2.16083	1.61954	13.9968	14.8099	13.9702	12.34	12.8639	12.7142
PPIB	A0A7P0Z497;P23284	0.890544	1.61004	15.442	17.3926	15.1108	13.5114	14.5673	15.0367
FLG2	Q5D862	1.65622	1.58312	15.6754	16.4629	17.1202	15.0211	14.6016	14.8865
LARS1	A0A6I8PIP7;A0A6I8PIT3;A0A6I8PIV1;A0A6I8PL42;A0A6I8PLB3;A0A6I8PLB8;A0A6I8PRS0;A0A6I8PS05;B4DER1;Q9P2J5;Q9P2J5-2	1.60455	1.56589	11.2007	11.4722	11.8712	10.6829	9.86822	9.29537
PYCR1	E2QRB3;P32322;P32322-2	2.93017	1.56192	14.8456	14.2901	14.6961	12.9963	13.2256	12.9242
KRT13	P13646	1.52819	1.55144	18.6566	19.4101	18.636	18.1039	16.7789	17.1656
CAT	P04040	1.11394	1.54667	14.2527	14.9415	15.5443	14.4368	12.8703	12.7914
CPSF6	F8WJN3;Q16630;Q16630-2;Q16630-3	0.591643	1.53953	13.5172	16.5447	13.8883	11.7873	13.6469	13.8975
KRT2	P35908	1.59033	1.52862	20.9935	21.3911	22.3882	20.2889	19.7792	20.1189
ARG1	P05089;P05089-2	0.771493	1.52017	14.3147	16.2316	16.9894	15.1818	14.0381	13.7553
CANX	A0A7P0T840;A0A7P0T8G1;A0A7P0T937;A0A7P0T9L0;A0A7P0TAE9;A0A7P0TB65;A0A7P0Z4D6;P27824;P27824-2	0.887884	1.5164	14.5202	13.6046	14.2744	11.4452	14.0065	12.3983
PSMA6	G3V5Z7;P60900;P60900-2	2.69993	1.51074	13.2446	13.2694	13.6459	11.7025	12.2072	11.718
ARGLU1	Q9NWB6	1.36529	1.50005	16.2027	17.7044	16.4858	15.4286	14.857	15.607
ACAD9	A0A7P0T7Z1;A0A7P0T871;A0A7P0T8U3;A0A7P0TB58;H0Y8Z9;Q9H845;Q9H9W4	0.764178	1.49891	10.5505	9.16939	10.1404	7.33352	10.0142	8.01578
SRSF2	J3KP15;J3QL05;Q01130;Q01130-2	0.842435	1.4856	16.7111	18.2776	15.4751	15.3952	15.1188	15.493
KRT4	P19013	0.313589	1.48386	10.7454	15.8048	16.9679	13.4166	13.2266	12.4232
PSMA3	P25788;P25788-2	1.85096	1.47377	14.4539	13.6377	14.2472	13.1495	12.4027	12.3652
RANBP1	C9JDM3;C9JGV6;C9JIC6;C9JJ34;C9JXG8;F6WQW2;P43487;P43487-2	0.76349	1.46244	13.1855	15.7199	13.1938	12.0874	12.9575	12.6671
TKT	A0A0B4J1R6;P29401;P29401-2	2.8821	1.45895	15.0452	14.8401	15.0059	13.8459	13.3489	13.3197
TYMP	C9JGI3;P19971;P19971-2	0.325047	1.45693	13.8628	8.23558	9.21504	8.35765	8.37419	10.2108
SERPINB4	P48594	0.661993	1.45326	12.3349	15.3866	14.8439	12.1317	13.2468	12.8272
JCHAIN	C9JA05;D6RD17;D6RHJ6;P01591	0.422674	1.45272	10.2109	14.5721	12.5355	12.4801	10.3604	10.1198
LYZ	A0A0B4J259;F8VV32;P61626	1.00057	1.41827	15.406	16.465	14.9463	14.87	13.2376	14.4548
NOMO1;NOMO1;NOMO1;NOMO1;NOMO3;NOMO3;NOMO3;NOMO3;NOMO3;NOMO3;NOMO3;NOMO1;NOMO2;NOMO2;NOMO2	A0A087WW46;A0A087X117;A0A0G2JN29;A0A0G2JP90;A0A7I2V2Z5;A0A7I2V3P4;A0A7I2V4D7;A0A7I2V4T6;A0A7I2V6B0;J3KN36;P69849;Q15155;Q5JPE7;Q5JPE7-2;Q5JPE7-3	1.15751	1.41046	13.2423	14.3775	13.0867	11.3622	12.4419	12.671
HMGA1	P17096;P17096-3	0.334441	1.40449	12.882	15.8806	11.5334	9.71447	13.3802	12.988
NCBP2AS2	Q69YL0	0.678382	1.40279	10.0832	11.8256	9.77696	8.39424	10.5357	8.54747
MYO1C	F5H6E2;O00159;O00159-2;O00159-3	2.29436	1.40049	16.391	15.9595	16.6215	14.6517	15.2046	14.9143
UPP1	Q16831	0.898528	1.38968	11.2935	13.3518	11.4328	10.5141	10.2213	11.1736
LORICRIN	P23490	0.986422	1.38704	14.3689	15.0552	16.487	14.3406	13.7354	13.6739
DSC3	Q14574	1.30539	1.36977	13.2408	13.8451	14.3235	13.1016	12.4088	11.7898
FUS	H3BPE7;P35637;P35637-2	0.787836	1.36578	12.7786	14.2421	11.8177	10.9134	12.2239	11.6037
ALOX12B	O75342	0.776053	1.36151	11.7663	13.019	13.6866	12.6198	10.8056	10.9619
ALDOA	H3BMQ8;H3BPS8;H3BQN4;H3BR04;H3BUH7;J3KPS3;P04075;P04075-2	1.09047	1.35239	16.8363	15.5077	14.8824	14.2409	14.3765	14.552
KRT80	Q6KB66;Q6KB66-2	1.05022	1.3502	15.3091	16.2361	16.5374	15.5441	14.5923	13.8957
POLR2E	A0A087WVN5;A0A087WVZ9;A0A087WWX0;A0A0A0MQR7;P19388	0.51848	1.34744	16.8652	13.7999	13.1717	13.2589	13.2603	13.2753
CUTA	C9IZG4;O60888;O60888-2;O60888-3	0.731029	1.34646	10.4183	12.3675	12.9347	9.83807	10.8735	10.9696
TPI1	P60174;P60174-3	1.61996	1.34178	12.4423	13.3439	13.6685	11.8297	11.9635	11.6362
CREG1	A0A3B3IRL2;O75629	0.667576	1.32837	13.5801	10.8748	12.1525	11.7053	10.7641	10.1529
BAIAP2	B4DWA1;I3L4C2;Q9UQB8;Q9UQB8-2;Q9UQB8-3;Q9UQB8-4;Q9UQB8-5;Q9UQB8-6	1.9383	1.3282	13.6488	13.7276	12.9638	11.7979	12.1464	12.4113
SLC2A1	P11166	2.30136	1.32161	14.708	15.1128	14.9929	13.3511	14.0156	13.4821
HAGH	H3BPK3;H3BPQ4;Q16775;Q16775-2	0.76303	1.29922	12.0614	10.1849	10.841	8.61499	10.3327	10.242
BZW2	E7ETZ4;Q9Y6E2	0.639233	1.28971	11.8803	14.3239	12.7671	10.5733	12.2157	12.3132
MCCC2	A0A804HJ24;A0A804HJ31;A0A804HK37;A0A804HKE8;A0A804HL02;A0A804HLJ9;Q9HCC0;Q9HCC0-2	2.54521	1.28886	13.6166	14.1695	13.6058	12.5275	12.3856	12.6122
POLDIP3	F6VRR5;Q9BY77;Q9BY77-2	0.53375	1.28563	11.7939	13.4537	11.6905	9.34847	12.4043	11.3285
CSDE1	E9PLT0;O75534;O75534-2;O75534-3;O75534-4	4.16808	1.28475	12.786	12.9636	12.8514	11.5285	11.5278	11.6905
PSMB1	P20618	1.03266	1.28313	10.1024	11.606	11.8545	10.1185	9.50035	10.0947
AZGP1	P25311	0.82733	1.27315	13.5413	15.6222	14.0091	13.5969	12.4754	13.2808
DSC1	Q08554-2	0.543375	1.26877	15.1657	16.7868	17.6867	16.4486	15.422	13.9623
SBSN	Q6UWP8	0.875542	1.26154	11.7601	12.8518	13.9684	11.5358	11.9875	11.2724
HSD17B12	A0A1B0GV93;Q53GQ0	1.55097	1.25527	11.5712	12.3607	12.3791	11.0688	11.1478	10.3285
NABP2	C9JMP5;C9JT95;Q9BQ15	1.60421	1.2544	11.2912	12.1747	11.8234	10.4783	10.092	10.9559
TGM5	A0A087WVW4;A0A087WZC4;O43548;O43548-2	0.421476	1.25404	12.4567	13.2502	14.3496	14.2434	11.7138	10.3371
GSDMA	Q96QA5	0.617246	1.24347	13.0207	12.9976	13.6251	13.6478	10.6617	11.6035
PKP1	Q13835;Q13835-2	0.606381	1.23812	14.6178	15.044	16.1754	15.3812	14.0902	12.6513
AGPS	A0A1B0GWA2;A0A2R8YEL0;A0A7P0T984;A0A7P0TAL3;A0A7P0TAU9;B7Z3Q4;O00116	1.17236	1.23649	14.1139	12.436	13.0358	11.9715	12.0738	11.8309
NUDT21	O43809	0.549068	1.23274	11.3599	13.7712	11.61	10.9004	9.97906	12.1634
PFDN6	A2AB88;O15212	1.48114	1.231	13.4155	14.2225	13.197	12.1129	12.1992	12.83
DUSP9	Q99956	2.19743	1.22404	12.3017	12.3142	11.7908	11.008	10.6032	11.1234
POF1B	Q8WVV4;Q8WVV4-1	0.458489	1.2189	12.66	14.3041	15.7797	14.4345	12.5051	12.1474
SRP14	P37108	1.45408	1.2179	15.4594	16.6098	15.6281	14.391	14.8958	14.7567
CDSN	G8JLG2;Q15517;Q2L6G8	0.617574	1.20429	15.0572	16.8554	17.839	15.947	15.3626	14.8292
KRT34	O76011	0.606901	1.1945	13.9738	13.8898	12.3536	13.1932	12.6036	10.837
FLG	P20930	0.53222	1.1889	12.1852	14.5561	15.428	13.1945	12.6036	12.8046
PSMA7	H0Y586;O14818;O14818-2	1.57615	1.1869	14.5015	13.6391	14.0759	13.1801	12.4091	13.0666
TGM1	P22735	0.973831	1.18671	13.7816	14.7734	14.8181	14.1453	12.5861	13.0816
POLR2C	P19387	1.69818	1.1756	12.841	12.375	12.9907	11.1159	11.5705	11.9934
SRSF3	P84103;P84103-2	0.925008	1.16599	19.4212	20.1234	18.1319	17.8962	18.1209	18.1614
SSR4	P51571	2.41803	1.15191	13.9039	14.1746	14.4222	12.9869	13.2334	12.8245
S100A8	P05109	0.821085	1.14706	14.813	15.4082	13.5082	12.7943	13.651	13.8429
EIF2S3;EIF2S3B	P41091;Q2VIR3	0.623866	1.14703	12.4696	14.4964	11.9875	11.2619	12.3018	11.9487
DSC2	A0A3B3ISU0;Q02487	0.397074	1.14405	8.13619	11.3968	8.89022	6.90074	8.97714	9.11316
HEXB	P07686	1.21443	1.14191	12.5106	13.6579	12.6777	12.2357	11.3403	11.8445
SPRR1B	P22528	0.86192	1.13912	17.0519	17.3822	17.9163	17.3958	16.0141	15.5232
CS	A0A0C4DGI3;B4DJV2;H0YIC4;O75390	0.783413	1.12902	12.5225	11.5802	10.7089	9.79991	11.2139	10.4106
PMPCA	Q10713;Q10713-2;Q5SXN9	1.60469	1.1182	12.9829	13.5544	12.7039	12.0868	11.5739	12.2259
EEF1D	A0A087X1X7;E9PI39;E9PIZ1;E9PK01;E9PL12;E9PL71;E9PMW7;E9PN91;E9PPR1;E9PQ49;E9PRY8;H0YCK7;P29692;P29692-2;P29692-3	0.543119	1.11604	13.5308	11.4104	13.5302	12.8452	11.0743	11.2037
UBE2H	C9JZY6;H7C4M9;P62256;P62256-2	1.44599	1.10737	15.4375	16.5653	16.1288	14.6623	15.0834	15.0638
DSG1	Q02413	0.551091	1.1062	16.4814	17.5879	18.7261	17.6248	16.3096	15.5424
TNS4	Q8IZW8	1.69829	1.09873	12.9254	13.5388	12.6466	11.6809	12.0527	12.081
CDC42	P60953	0.581795	1.08936	12.5117	13.4431	11.5189	10.1556	12.0317	12.0182
ISYNA1	Q9NPH2	2.53637	1.08626	16.5617	15.9921	16.297	15.2449	15.2073	15.1398
KRTAP3-2	Q9BYR7	0.416439	1.06773	13.1474	9.97916	12.8888	11.7318	10.612	10.4684
ALDH1A3	H0Y2X5;P47895	1.17536	1.06734	13.9659	12.7904	12.7421	11.9378	11.9621	12.3965
;TGM3	A0A494C0J7;Q08188	0.665022	1.06048	14.9094	15.3995	16.1976	15.6457	13.5998	14.0796
CYRIB	Q9NUQ9	0.507518	1.05915	13.4834	15.5383	12.6434	12.2121	13.1306	13.145
;TUBB3	A0A0B4J269;Q13509	0.925152	1.05788	14.5471	13.5359	13.5553	11.9909	13.1704	13.3034
WFDC12	Q8WWY7	0.579023	1.05732	14.2538	14.3115	14.6067	14.9377	12.6716	12.3907
IGHG1	A0A0A0MS07;A0A0A0MS08;P01857	0.517279	1.03986	13.867	12.7941	14.9491	13.8991	12.8592	11.7323
EFHD2	Q96C19	1.05316	1.03717	13.6913	14.6723	13.1774	13.0682	12.8049	12.5564
ANKRD40	Q6AI12	0.245197	1.03711	13.9929	9.64896	12.5863	12.851	11.1371	9.12874
PFKL	P17858	1.24167	1.0351	12.7251	13.5644	13.5468	11.6974	12.5936	12.44
APEX2	Q9UBZ4	0.931036	1.03366	11.6382	10.1907	10.3569	9.22305	10.0471	9.81469
KPRP	Q5T749	0.573065	1.03301	17.548	17.9378	18.9335	18.4806	16.4841	16.3556
PSMB5	P28074	1.54576	1.03	14.0712	14.0324	14.3875	13.6624	13.0575	12.6813
DEK	A0A494C028;B4DFG0;H0Y993;P35659;P35659-2	1.20396	1.02989	14.9175	15.6223	14.2773	13.8824	13.7443	14.1007
TARS1	P26639;P26639-2	0.211088	1.0205	12.997	12.6853	7.91948	8.38402	10.9323	11.2239
SMNDC1	O75940	1.45657	1.01185	15.749	14.85	14.7828	14.1941	14.2043	13.9478
SERPINB12	Q96P63;Q96P63-2	0.455787	1.00719	13.5197	16.0546	16.3909	14.8753	14.1902	13.8782
SFXN1	Q9H9B4	0.509618	0.999482	14.0341	11.3901	13.6646	11.8283	12.4959	11.7661
;LDHB;LDHB;LDHB;LDHB	A0A3B3IS95;A0A5F9ZHM4;A8MW50;C9J7H8;P07195	0.827297	0.987307	12.7636	13.638	11.994	11.4126	11.661	12.3601
EIF3F	H0YDT6;O00303	0.456779	0.982071	17.0018	19.4917	16.5258	16.4561	16.7682	16.8488
UNC13B	A0A1B0GUS7	0.557103	0.981555	13.3238	12.1689	13.3811	13.235	10.9292	11.7649
TUBB4A	P04350	1.55933	0.978804	14.7253	15.3583	14.6292	13.5742	14.0694	14.1327
S100A7	P31151	0.478983	0.978793	14.6411	15.9315	12.8982	13.3077	13.4954	13.7313
EIF4EBP1	Q13541	1.0995	0.978088	15.5211	14.1931	14.8358	13.9854	14.0876	13.5428
IGKC	P01834	0.606023	0.977745	12.4313	13.1428	13.349	13.3107	11.5438	11.1353
ENO1	A0A2R8Y6G6;P06733	1.65632	0.977141	14.0873	14.8158	14.4983	13.8227	13.3043	13.3429
KRT81	A0A087X106;Q14533	0.154982	0.974921	17.2217	12.6689	9.30812	12.7152	12.5153	11.0434
S100A4	P26447	0.318377	0.961877	13.1232	10.6029	12.8991	12.761	9.52559	11.453
KRT13	K7EMD9	0.825822	0.96184	15.1463	16.2781	16.5695	15.6323	14.5326	14.9435
PNP	P00491	0.216443	0.957973	8.93873	14.114	13.6716	12.1858	11.0525	10.6121
KRT71	Q3SY84	0.270169	0.954978	17.0983	21.8957	20.2171	18.4816	18.8098	19.0546
ADA	P00813	1.6924	0.954063	14.0599	13.4271	14.2631	12.8971	13.0501	12.9407
HLA-A;HLA-A;HLA-A;HLA-C;HLA-C;HLA-C;HLA-A;HLA-C;HLA-A;HLA-A;HLA-C;HLA-A;HLA-A;HLA-A;HLA-A;HLA-A	A0A0G2JI36;A0A0G2JIF2;A0A0G2JL56;A0A140T912;A0A140T930;A0A140T937;A0A1W2PQD0;A0A1W2PRZ0;A0A1W2PS24;A0A1W2PSE7;O78179;P04439;P04439-2;Q5SRN5;Q5SRN7;Q5SUL5	1.7636	0.949193	14.9547	15.6576	15.0605	14.1004	14.4589	14.2659
TIMM50	M0R003;Q3ZCQ8;Q3ZCQ8-2	0.851598	0.946784	14.3014	14.2569	12.8501	12.4953	13.1832	12.8895
CDK6	Q00534	2.60465	0.94653	15.8934	15.4857	15.6885	14.7593	14.6044	14.8644
GGCT	B8ZZK2;O75223	0.790834	0.94	13.4439	15.1617	14.2631	12.9247	13.7343	13.3897
RCC1	P18754;P18754-2	1.03221	0.931752	13.2286	13.5346	12.4888	12.0603	11.7047	12.6918
NAXE	A0A7P0TAG8;Q8NCW5;Q8NCW5-2	1.37878	0.926725	14.5989	13.769	14.2788	12.8932	13.4347	13.5386
GAPDH	P04406	0.790721	0.922344	16.484	17.7442	18.1954	16.8809	16.4344	16.3413
VCP	A0A7I2V540;A0A7P0T8A3;A0A7P0T8Q5;A0A7P0TAQ1;A0A7P0TAW3;A0A7P0Z4C6;C9JUP7;P55072	1.04068	0.920897	12.3188	13.4267	13.2539	11.8021	11.8924	12.5422
HRNR	Q86YZ3	0.499819	0.920251	17.2781	17.2352	19.0682	17.9986	16.4898	16.3324
KRT14	P02533	0.614585	0.910706	18.5647	19.662	20.4095	19.3949	18.4374	18.0717
KRT5	P13647	0.624066	0.910357	20.1929	21.5551	22.1373	20.9241	20.3942	19.836
SYPL1	C9JYN0;Q16563;Q16563-2	0.594471	0.907326	14.9596	16.8601	14.8369	14.9769	14.3125	14.6451
KIF23	A0A2U3TZL8;A0A7I2V5Y5;H7BYN4;Q02241;Q02241-2	0.903703	0.905567	14.8551	15.3315	14.6143	13.2006	14.3466	14.5369
S100A6	P06703;R4GN98	0.374693	0.905507	15.2327	17.6199	14.7487	14.048	15.1165	15.7202
CLPB	A0A2U3TZY2;H0YGM0;Q9H078;Q9H078-2;Q9H078-4	0.419434	0.903856	11.4832	10.1911	11.0622	8.54333	10.0438	11.4377
NUP160	E9PR16;G3V198;Q12769	1.1381	0.903829	12.0109	12.6854	12.192	10.8447	11.9338	11.3983
LAMP1	P11279;P11279-2	0.536175	0.903737	9.79584	12.1966	11.4982	9.9085	10.2342	10.6367
SDHB	P21912	1.54371	0.899106	15.7629	15.9497	15.3743	14.3823	15.04	14.9674
MDH2	P40926;P40926-2	0.628324	0.89849	9.98592	11.5543	10.3678	8.86325	10.1383	10.211
KRT1	P04264	0.578229	0.894594	22.2049	23.4342	24.1961	23.0474	22.3442	21.7597
EIF5	P55010	0.233273	0.894246	11.0749	11.3336	7.55286	7.37983	9.5814	10.3174
KRT78	Q8N1N4	0.485919	0.893325	18.9909	20.1989	21.0493	20.2441	18.7612	18.5539
KRT19	P08727	0.673412	0.890158	17.7037	19.238	18.6878	18.4293	17.4204	17.1093
LDB1;LDB2;LDB2;LDB2;LDB2;LDB2;LDB2;LDB1;LDB1;LDB1	A0A6E1WJ75;E9PFI4;G5E9Y7;H0YA09;O43679;O43679-2;O43679-3;Q86U70;Q86U70-2;Q86U70-3	1.48211	0.889941	11.8155	12.1262	12.5067	10.897	11.5585	11.323
IGHA2;IGHA1;IGHA1	A0A0G2JMB2;A0A286YEY1;P01876	0.453505	0.877795	12.7762	15.5265	14.0561	13.6397	13.3149	12.7709
UBL5	Q9BZL1	0.50645	0.874397	13.4569	15.5691	13.5808	13.4499	13.8113	12.7224
PML	H3BT57;P29590;P29590-10;P29590-11;P29590-12;P29590-13;P29590-14;P29590-2;P29590-3;P29590-4;P29590-5;P29590-8;P29590-9	0.882041	0.872309	13.0563	14.2855	12.9569	12.7885	12.6704	12.2229
;;CTSD;CTSD;CTSD;CTSD;CTSD;CTSD;;CTSD	A0A1B0GU03;A0A1B0GU92;A0A1B0GV23;A0A1B0GVD5;A0A1B0GW44;A0A1B0GWE8;C9JH19;F8W787;H7C469;P07339	2.04567	0.86789	13.6794	14.1138	14.2525	13.1669	13.0342	13.241
NOL3	H3BM67;H3BUN4;H3BUP2;O60936;O60936-3	3.41272	0.867507	13.9352	13.7798	13.8699	12.9952	12.8817	13.1055
LDHA	F5GXY2;F5GYU2;P00338;P00338-2;P00338-5	0.735913	0.866024	12.4163	13.4539	13.836	11.7682	12.4204	12.9196
UBE2L6	O14933	1.15918	0.864924	16.244	16.5063	15.561	14.9472	15.1251	15.6442
KRT9	P35527	0.450129	0.863099	22.3844	24.5542	24.7721	23.5216	23.1566	22.4433
G6PD	P11413;P11413-2;P11413-3	1.5787	0.863095	14.5447	15.2017	14.5266	13.7807	13.7739	14.1292
CSNK2A2	P19784	0.202904	0.860608	9.81927	13.3701	14.5893	12.6377	12.4097	10.1495
SLPI	P03973	1.17903	0.860463	10.9455	11.5357	12.0314	10.4522	10.5659	10.9132
NPM3	O75607	2.31819	0.857994	18.5262	18.1823	18.0612	17.4693	17.2795	17.447
PRDX2	P32119	1.24697	0.855607	15.7171	16.1165	16.4967	15.7102	14.9666	15.0866
DSP	P15924	0.534517	0.852135	16.9512	18.203	19.0572	17.7862	17.2782	16.5907
IRF2BPL	Q9H1B7	0.396462	0.847842	13.2134	11.4947	11.2511	11.9817	11.5968	9.83721
ZG16B	A0A0C4DGN4;Q96DA0	0.161409	0.846987	9.67611	15.0155	9.54716	11.9121	9.14322	10.6424
NCCRP1	Q6ZVX7	0.538838	0.841792	15.0594	15.2053	16.2138	15.7945	14.3039	13.8547
DCAF7	P61962	1.61428	0.840749	14.2089	13.4811	13.6618	12.7925	12.9191	13.1179
JUP	P14923	0.45931	0.840573	16.1114	17.5419	18.2301	17.36	16.2982	15.7036
TRUB1	Q8WWH5	0.351163	0.837442	12.0103	9.85968	11.4549	9.84841	9.23169	11.7325
HMGA1	P17096-2	0.321373	0.835915	13.588	16.3259	13.1859	12.8383	14.2451	13.5087
NCAPG	Q9BPX3	0.880438	0.835402	13.9862	12.6002	13.5484	12.3881	12.877	12.3636
UQCRH	P07919	2.45422	0.829505	14.6513	14.5864	14.3388	13.5692	13.8821	13.6367
APEX1	G3V3M6;G3V5Q1;P27695	0.652753	0.829221	11.7019	13.2431	11.5445	10.9564	11.4715	11.5741
DLST	P36957;P36957-2	1.47613	0.828976	14.9772	14.2077	14.2466	13.7699	13.5215	13.6532
ANXA13	E5RIN3;P27216;P27216-2	1.40462	0.82796	20.1971	19.4083	19.8126	19.1227	19.1405	18.671
DUSP23	Q9BVJ7	1.9131	0.826319	13.9505	14.4564	14.1682	13.3145	13.1853	13.5963
PDCD6	A0A024QZ42;O75340;O75340-2	0.74769	0.82583	14.1335	14.5225	13.4127	12.4249	13.6682	13.4981
DEFA1B;DEFA3	P59665;P59666	0.832163	0.825393	12.8877	13.866	13.4729	13.0854	11.8815	12.7836
CPNE1	A6PVH9;B0QZ18;F2Z2V0;Q99829	1.56359	0.822785	12.7978	12.1548	12.1108	11.3398	11.6463	11.6089
GGH	Q92820	0.75188	0.821065	11.6582	12.1386	12.8831	12.0937	10.9233	11.1998
DPM1	H0Y368;O60762;Q5QPK2	1.14817	0.819139	13.4704	14.2513	13.3516	12.5869	13.209	12.82
C11orf54;;C11orf54;C11orf54;C11orf54;C11orf54	A0A087WT99;A0A1W2PRB8;E9PQS1;Q9H0W9;Q9H0W9-2;Q9H0W9-3	0.541631	0.818176	12.9247	10.9178	12.5213	10.8581	11.2808	11.7704
GTPBP4	Q9BZE4;Q9BZE4-2	0.198055	0.816337	15.9065	13.7853	10.5074	13.019	12.385	12.3461
EXOSC3	Q9NQT5;Q9NQT5-2	0.748964	0.811071	15.2436	14.5219	14.8482	13.2151	14.758	14.2073
UBE2T	Q9NPD8	1.19012	0.799145	14.2386	13.3701	13.5225	13.1383	12.5852	13.0102
UQCR10	Q9UDW1	0.6125	0.795228	15.5247	16.3711	14.4875	14.2678	14.9631	14.7667
TRIM28	Q13263	1.72228	0.792473	15.6136	16.1754	15.6452	14.8182	15.1221	15.1165
FHL2	Q14192	1.16157	0.791354	14.7253	13.9664	13.9472	13.0605	13.7167	13.4876
RPL36A;RPL36A-HNRNPH2;RPL36A;RPL36A	H0Y5B4;H7BZ11;J3KQN4;P83881	0.803441	0.790351	16.9567	15.9614	15.7769	14.9332	15.8508	15.5398
NIBAN2	Q96TA1;Q96TA1-2	0.799939	0.787177	12.1741	11.4416	11.6124	10.4435	11.7378	10.6853
GSDMD	G3V1A6;P57764	0.682302	0.78687	14.5167	13.2665	12.9094	13.01	12.3929	12.9291
MARCKSL1	P49006	0.830242	0.786633	13.5248	13.1562	13.0187	12.6484	13.0385	11.653
MYL12A;MYL12B;MYL12A	J3QRS3;O14950;P19105	3.08694	0.782149	14.8328	14.7719	14.7601	14.1293	14.0414	13.8476
G3BP2	A0A7I2V382;A0A7I2V3P9;A0A7I2V647;A0A7I2YQD9;Q9UN86;Q9UN86-2	0.654194	0.779121	13.0689	11.2491	12.1313	11.6053	11.2141	11.2926
KDM3B	Q7LBC6	1.04855	0.777685	13.2972	13.4905	12.4958	12.5862	12.0043	12.36
DVL3;DVL2;DVL2;DVL2;DVL2;DVL3;DVL3	A0A3B3ITC6;I3L0M7;I3L2N2;I3L2W9;O14641;Q92997;Q92997-2	0.702489	0.776815	8.92696	9.05446	9.25494	9.16899	8.28336	7.45357
DDX39A;DDX39B;DDX39B;DDX39B	O00148;Q13838;Q13838-2;Q5STU3	0.879145	0.773743	14.2621	15.6303	14.6405	14.1216	13.9919	14.0982
SRSF1	J3KTL2;Q07955	0.619741	0.7602	16.9634	18.1726	16.2985	16.3153	16.3444	16.4942
PDRG1	Q9NUG6	1.21262	0.757128	12.2263	11.4631	11.7427	10.6844	11.3214	11.155
PLCG1	P19174;P19174-2	1.59773	0.755461	13.8342	13.5292	13.158	12.9023	12.7728	12.5799
SREK1	Q8WXA9-2	0.571554	0.753092	12.315	13.8219	12.4191	11.4437	12.4474	12.4056
RSRC2	Q7L4I2;Q7L4I2-2	1.36762	0.748642	15.5517	15.4346	14.7774	14.6233	14.3398	14.5546
CAPN1	P07384	0.98212	0.747371	14.3825	14.5422	13.8055	12.9931	13.5431	13.9519
TUBA4A	P68366;P68366-2	1.70474	0.74469	15.3468	14.8685	14.7533	14.2932	14.35	14.0913
HSP90B1	A0A087WT78;A0A7P0T823;A0A7P0T917;A0A7P0TAE1;A0A7P0TAT8;H0YIV0;P14625	2.00315	0.74401	13.9095	13.3849	13.6853	12.8566	13.0235	12.8675
PPP4C	H3BTA2;H3BV22;P60510	0.638032	0.742996	14.5092	12.9439	12.9859	12.6781	12.5932	12.9388
GRWD1	Q9BQ67	0.335435	0.738748	12.5541	14.4233	12.4307	11.1545	12.7484	13.289
SRSF11	Q05519;Q05519-2;Q5T760	1.19052	0.737844	15.0267	15.1784	14.4056	14.3373	13.7944	14.2655
USP11	G5E9A6;P51784	1.11695	0.736716	14.6334	15.0598	14.0375	13.6626	13.8927	13.9653
GNA14;GNA11;GNAQ	O95837;P29992;P50148	2.19928	0.736627	14.4405	14.0767	14.3913	13.5655	13.4244	13.7088
PRPF40A	A0A7N4I394;O75400;O75400-2;O75400-3	1.11281	0.736007	14.8265	14.2694	13.7819	13.5861	13.414	13.6697
ERRFI1	Q9UJM3	0.709796	0.734788	14.1153	14.9284	14.2792	12.9229	13.9384	14.2572
CLIC1	O00299	1.79295	0.729516	13.6019	13.9442	13.672	12.8588	12.862	13.3088
CARHSP1	Q9Y2V2	0.963182	0.729161	15.5949	16.2528	15.1521	14.6524	14.9832	15.1767
S100A14	Q9HCY8	0.361371	0.724591	11.7032	13.844	14.3708	12.2241	12.8404	12.6797
PFN2	P35080	0.905512	0.724032	18.2847	19.1683	18.0177	17.5335	17.7625	18.0025
DNAJC19	F2Z3A7;G5E9V2;Q96DA6	0.453025	0.721646	12.3307	13.2874	12.0422	10.8094	12.7949	11.891
LUC7L2	Q9Y383	0.49394	0.714682	15.5562	17.0633	15.1354	14.832	15.1377	15.6411
PFDN2	Q9UHV9	0.587822	0.707207	13.9194	15.6053	14.3595	13.6244	13.8821	14.2561
GSTP1	A8MX94;P09211	1.00704	0.705615	13.5344	13.5298	14.3251	13.4341	13.0812	12.7572
DRG1	Q9Y295	1.79536	0.701802	14.3092	14.3388	13.8035	13.4055	13.4765	13.4641
MED16	Q9Y2X0;Q9Y2X0-2;Q9Y2X0-3	2.63197	0.701426	13.3484	13.2941	13.1159	12.6063	12.6426	12.4052
MYH9	P35579	3.08687	0.694014	15.7064	15.6647	15.813	15.1582	14.9838	14.9601
AKT1S1	Q96B36	1.55583	0.691718	14.3927	13.7864	13.895	13.5011	13.2522	13.2458
MID1IP1	Q9NPA3	1.15176	0.688452	14.8002	13.8669	14.2701	13.7747	13.5184	13.5788
CSNK2B	P67870;Q5SRQ6	1.1768	0.682451	12.6538	13.2161	12.5007	12.308	11.7817	12.2336
HSPA4	A0A087WTS8;A0A087WYC1;P34932	1.84388	0.680905	13.4749	13.3015	13.4093	12.4067	12.82	12.9163
CSTB	P04080	0.406578	0.677827	14.8489	16.1704	13.9013	13.8096	14.3823	14.6952
EEF1E1-BLOC1S5;EEF1E1;EEF1E1;EEF1E1	C9J1V9;D6RBD7;O43324;O43324-2	1.32018	0.675859	13.6658	13.5467	13.0041	12.8587	12.8535	12.4769
NONO	A0A7I2V4J2;A0A7I2V535;A0A7I2V5Y7;Q15233	0.272447	0.670096	14.0734	16.8767	14.3894	13.8228	15.2728	14.2336
SNRPD2	P62316	0.571774	0.667934	16.5969	17.878	16.1546	16.1192	16.1989	16.3076
PSMC4	P43686;P43686-2	0.628574	0.653317	11.3133	12.6716	12.0399	10.8772	11.7481	11.4395
PSMA2;;PSMA2	A0A024RA52;A0A7I2V2H3;P25787	1.18306	0.653028	12.9775	12.8649	13.6808	12.6133	12.4894	12.4613
CRCT1	Q9UGL9	0.167664	0.650081	8.59505	9.75322	11.8315	10.3591	10.6828	7.18758
MCM7	P33993;P33993-3	2.44217	0.650048	15.4095	15.1342	15.0879	14.5756	14.4941	14.6116
SNRPC	P09234	0.985773	0.646681	13.4842	14.3114	13.3433	13.0117	13.1828	13.0043
SF3B4	Q15427	0.424071	0.646652	13.4313	15.1379	13.0615	13.1657	13.4642	13.0608
PFDN4	E9PQY2;Q9NQP4	0.91764	0.643862	14.2652	13.8863	13.7278	13.8048	12.8133	13.3295
LUC7L	Q9NQ29;Q9NQ29-2	0.896827	0.638063	15.7281	16.1719	15.0729	15.0404	14.8535	15.1648
LGALS7B	P47929	0.389878	0.635711	14.7893	15.5728	16.2065	15.9045	14.7499	14.0071
DDX6	P26196	0.675684	0.633401	13.0916	14.4587	13.3598	12.8523	13.036	13.1218
LMNB1	E9PBF6;P20700	3.08208	0.632776	15.1369	15.0351	15.039	14.4639	14.5284	14.3203
ARPC3	C9JZD1;F8VR50;O15145	1.98445	0.632011	15.4829	15.8707	15.4443	14.9154	15.0007	14.9857
DCTPP1	Q9H773	2.42561	0.630846	14.9315	14.9034	14.6691	14.327	14.1627	14.1217
CIAO2B	Q9Y3D0	1.13739	0.630317	13.6697	13.4113	13.4419	12.3833	13.1532	13.0954
PRKAR1A	P10644	0.75719	0.626553	12.5163	11.7089	11.9463	11.6047	10.8544	11.8327
TSEN34	A0A590UJ73;A0A590UJW4;E7EQB3;Q9BSV6	1.04751	0.625779	14.5172	13.7414	13.7637	13.4333	13.5541	13.1576
CKAP4	Q07065	0.370861	0.625244	9.28854	10.1029	10.9885	8.55397	10.2888	9.66143
G3BP1	A0A7I2V5M7;A0A7I2YQN9;Q13283	0.839287	0.622351	13.9285	14.9858	14.0571	13.6024	13.6284	13.8735
CTBP2	P56545;P56545-2;P56545-3	0.658627	0.620299	14.9933	13.8005	13.8783	13.9172	13.2841	13.61
ACTR8	Q9H981	0.912571	0.620173	13.2188	14.3001	13.6844	13.1667	13.0122	13.1638
PRPF38A	Q8NAV1	0.448675	0.620126	13.4106	15.1208	14.1044	12.9378	13.9351	13.9025
STAU1	O95793;O95793-2;O95793-3;Q5JW30	0.504861	0.618368	12.4225	13.5209	12.2371	11.4649	12.693	12.1676
NRGN	Q92686	0.558319	0.617137	14.625	15.1061	14.6102	13.3669	14.1547	14.9684
ACTN4	O43707	0.409015	0.615444	14.7361	16.0391	14.269	13.701	14.6172	14.8796
PRDX4	Q13162	0.972053	0.613595	13.3941	13.5461	13.61	12.3373	13.0864	13.2858
UNC45A	A0A1W2PNX8;Q9H3U1;Q9H3U1-2	1.79833	0.611975	14.371	14.261	14.6559	13.687	14.0064	13.7585
CYC1	P08574	2.36871	0.611807	14.5274	14.7368	14.7268	13.8979	14.0948	14.1629
RNMT	K7EP06;O43148;O43148-2	1.24418	0.607669	13.6962	14.4517	13.8746	13.3933	13.4454	13.3608
HSP90AA1	P07900;P07900-2	1.60442	0.60712	15.0177	15.3826	15.1489	14.3227	14.6135	14.7917
ANAPC10	Q9UM13	0.39896	0.606639	15.9886	13.9342	14.2205	14.1668	14.0505	14.1062
OTUB1	F5GYJ8;F5GYN4;J3KR44;Q96FW1	0.925292	0.605828	12.8373	13.3313	12.968	12.4674	12.8892	11.9625
FSCN1	Q16658	0.622005	0.602577	14.3363	13.9463	13.2102	12.6628	13.4621	13.5602
PPIG	A0A7I2V4W3;A0A7I2V5Q5;A0A7I2V629;C9JN15;Q13427;Q13427-2	0.825126	0.601247	13.9517	14.0941	13.1607	13.446	13.1062	12.8506
PIP	P12273	0.795139	0.598497	14.222	14.6339	13.5839	13.8722	13.4489	13.3233
MRPS27	G5EA06;Q92552;Q92552-2	0.551452	0.598431	13.9145	14.0195	12.62	12.599	13.1682	12.9915
PAXX	Q9BUH6	2.46434	0.597692	15.0377	15.2506	15.0012	14.4024	14.4949	14.5991
OSBPL8	F8VQX7;F8VUA7;Q9BZF1;Q9BZF1-2;Q9BZF1-3	0.629194	0.595526	14.0221	12.9592	12.6713	12.4721	12.8448	12.5492
CIBAR1;CIBAR1;FAM92A;FAM92A;FAM92A;FAM92A;FAM92A;CIBAR1;CIBAR1;CIBAR1;CIBAR1	A0A087WTS3;A0A0B4J212;A1XBS5;A1XBS5-2;A1XBS5-3;A1XBS5-4;A1XBS5-5;E5RGD0;E5RHK0;F8W7P5;H0YC32	1.91657	0.593808	13.1861	13.2795	13.135	12.7946	12.3578	12.6668
UBE2S	K7EPJ1;Q16763	1.58513	0.588737	16.7474	16.7022	16.7516	16.2513	15.8125	16.3711
DDX46	A0A0C4DG89	1.11872	0.586912	15.0315	14.8776	14.2808	14.3017	13.9832	14.1443
ATAD3A	Q9NVI7-2	2.62795	0.584767	15.2339	15.1713	15.1188	14.5916	14.7248	14.4533
KRTAP3-1	Q9BYR8	0.256893	0.584534	12.8087	11.0088	10.2126	11.3273	11.1418	9.80732
ALB	A0A0C4DGB6;P02768	0.383549	0.583905	15.3146	16.2363	15.8565	16.1358	15.3803	14.1396
ATP5MF-PTCD1;ATP5MF;ATP5MF-PTCD1;ATP5MF;ATP5MF;ATP5MF;ATP5MF	C9JJT5;C9JU26;G3V325;P56134;P56134-2;P56134-3;P56134-4	0.872035	0.581171	15.6128	14.9472	15.3283	14.4155	15.1961	14.5332
CPSF7	Q8N684;Q8N684-3	0.098418	0.579441	15.7003	17.1998	10.5013	13.5019	15.0233	13.1378
VARS1	P26640	1.91402	0.578864	14.858	14.6003	14.8976	14.3916	14.076	14.1516
SEC16A	A0A3F2YNX0;A0A3F2YNZ0;F1T0I1;O15027;O15027-2;O15027-3;O15027-4;O15027-5	1.45122	0.575849	14.2088	14.8005	14.4207	14.0107	13.7914	13.9004
PFN1	P07737	0.112558	0.575233	9.40239	14.9453	12.4543	9.87765	12.2524	12.9463
PRDX6	P30041	2.76438	0.571307	17.117	17.0758	16.9261	16.5401	16.3724	16.4925
PUF60	A0A0J9YVP6;A0A0J9YXJ8;A0A0J9YXX5;A0A0J9YYL3;Q9UHX1;Q9UHX1-2;Q9UHX1-3;Q9UHX1-4;Q9UHX1-5;Q9UHX1-6	0.8377	0.569486	15.5286	15.6841	14.7515	14.6978	14.5631	14.9949
LSM14A	Q8ND56;Q8ND56-2;Q8ND56-3	0.374965	0.568601	13.6222	13.6732	12.0021	12.3773	12.0669	13.1476
MAPK1	P28482	0.806504	0.566825	14.7157	14.8645	15.0719	14.7054	13.7085	14.5376
CSRP2	Q16527	2.29621	0.566082	16.7308	16.5297	16.548	16.033	16.1746	15.9026
RNPS1	H3BMM9;H3BTC0;H3BV80;Q15287;Q15287-2;Q15287-3	0.952607	0.561998	16.2403	16.6113	15.6722	15.6572	15.6499	15.5308
CEP85	H7BZW2;Q6P2H3;Q6P2H3-2;Q6P2H3-4	0.188339	0.561038	13.517	11.1188	10.1962	9.94353	11.4126	11.7927
CSNK2A1;CSNK2A1;CSNK2A1;CSNK2A1;CSNK2A3	A0A2R8YD58;A0A2R8YF43;E7EU96;P68400;Q8NEV1	1.94165	0.5608	15.3661	15.0639	15.1365	14.7866	14.4827	14.6149
CCAR2	E5RHJ4;Q8N163;Q8N163-2	1.02363	0.560558	15.4934	14.688	15.0246	14.7176	14.4448	14.3618
DIAPH1	A0A0G2JH68;A0A140T8Z0;A0A2R8Y5N1;H9KV28;O60610;O60610-2;O60610-3	0.517902	0.560279	13.0748	11.5555	11.7735	11.5967	11.5266	11.5998
RNF126	K7EIY6;Q9BV68;U3KQF4	0.186059	0.557745	12.6774	13.6354	10.622	11.8837	10.4453	12.9326
CENPM	B1AHQ6;B1AHQ7;Q9NSP4;Q9NSP4-2;Q9NSP4-4	0.297152	0.557484	11.9636	13.8457	11.9049	11.1839	12.3813	12.4765
ECPAS	A0A804HJA4;J3KN16;Q5VYK3	0.612318	0.556899	21.1209	19.8789	19.9691	19.6038	19.8244	19.8701
ETHE1	O95571	1.66142	0.550667	15.789	15.4206	15.324	15.0132	14.8565	15.012
PPP4R2	C9IZ04;Q9NY27	0.685577	0.549281	13.8215	13.4752	14.3272	13.4165	12.8229	13.7366
HNRNPA2B1	A0A7I2V323;A0A7I2V3P1;A0A7I2V3P7;A0A7I2V4I6;A0A7I2V4N1;A0A7I2V4S4;P22626;P22626-2	0.360788	0.548761	15.0213	16.7826	15.6132	14.5237	15.6388	15.6084
SEC31A	D6REX3;D6RHZ5;H0Y8V7;H0Y9K1;H0YAB3;H7BXG7;O94979;O94979-10;O94979-2;O94979-3;O94979-4;O94979-6;O94979-7;O94979-8;O94979-9	0.672749	0.548098	11.8172	10.7018	11.0632	10.6102	10.9562	10.3715
KPNA1	P52294	0.864264	0.547966	13.8664	13.7494	13.958	12.7566	13.7291	13.4442
PGK1	P00558;P00558-2	0.148995	0.543825	10.7271	11.6622	13.113	12.5722	12.3426	8.95611
TRIM32	Q13049;Q5JVY0	1.71863	0.542941	12.8186	12.7474	12.6743	11.948	12.4153	12.2482
POLR1B	Q9H9Y6;Q9H9Y6-3;Q9H9Y6-5	0.872487	0.540353	12.1541	11.3506	11.3991	11.1941	11.2413	10.8473
ST7	B7Z4L1;B7Z4U3;C9JRW1;C9JU30;E7ENZ9;E7EPD9;E7EPW5;E9PCV1;G3XAH9;H7BXS2;Q9NRC1;Q9NRC1-2;Q9NRC1-3;Q9NRC1-4;Q9NRC1-5;Q9NRC1-6;Q9NRC1-7	0.866631	0.538657	17.1439	16.5497	16.9224	15.8725	16.5267	16.6008
UBE2C	O00762	0.937343	0.538006	13.8281	13.0126	13.3314	12.8816	13.0541	12.6224
DCTN2	A0A7I2V4H4;A0A7I2V4Y9;A8K8J9;F8W1I6;H0YHL1;Q13561;Q13561-2;Q13561-3	0.482006	0.536963	11.2848	11.003	11.4382	11.3662	10.946	9.80289
NUP98	P52948;P52948-2;P52948-5	0.942355	0.535968	12.5254	12.8375	12.1418	11.6183	12.1183	12.1602
CNN3	Q15417;Q15417-3	0.977096	0.535714	15.7824	16.2229	15.5402	15.0026	15.3896	15.5461
PGM3	A0A087WT27;A0A494C0G1;A0A494C1E2;A0A494C1Q4;H0Y987;J3KN95;O95394;O95394-3;O95394-4	0.657058	0.53312	15.1413	13.894	14.3703	13.8919	13.8731	14.0413
MVD	P53602	1.37696	0.531073	15.0114	15.1948	14.6816	14.3834	14.2887	14.6225
ODC1	P11926	0.628485	0.528455	15.1729	14.1283	14.0843	14.1695	13.7232	13.9075
ISOC2	Q96AB3	1.40164	0.525927	17.7267	17.4131	17.3639	17.1872	16.7303	17.0084
TUBB6	Q9BUF5	1.12939	0.525643	14.1919	13.9579	14.3364	13.2884	13.9386	13.6822
LUC7L3	J3KPP4;O95232	0.470192	0.525552	12.5498	13.5294	12.0586	12.1189	11.8484	12.5938
GSN	A0A0A0MS51;A0A0A0MT01;A0A0U1RQL8;P06396;P06396-2;P06396-3;P06396-4;Q5T0I0	0.286375	0.522472	9.95429	11.6156	12.268	11.1653	10.8326	10.2727
DNAJC2	Q99543	0.745412	0.522168	14.0657	14.4759	13.4124	13.4386	13.326	13.6228
MPG	A2IDA3;P29372;P29372-2;P29372-4;P29372-5	0.31651	0.522158	12.9574	12.8351	11.2776	12.4481	11.0714	11.9842
LRSAM1	A0A6Q8PFL5;A0A6Q8PFT9;A0A6Q8PG02;A0A6Q8PGB2;A0A6Q8PGF7;A0A6Q8PGT8;A0A6Q8PGW1;Q6UWE0;Q6UWE0-2;Q6UWE0-3	0.440253	0.521187	11.99	11.708	10.7743	10.8662	10.4203	11.6222
PGP	A6NDG6	0.813793	0.519395	15.3047	14.3568	14.7668	14.4938	14.12	14.2563
ACTB	P60709	1.96798	0.518772	17.2785	16.9979	17.1365	16.7824	16.5343	16.5399
EXOC6	E7EW84	0.735716	0.517553	22.0389	21.1727	21.007	20.9355	20.8082	20.9223
UBE2M	P61081	1.76476	0.516069	14.8529	14.9514	14.8155	14.1146	14.5316	14.4254
HEATR1	Q5T3Q7;Q9H583	0.280661	0.514284	9.96858	10.8822	10.7226	8.71469	10.2906	11.0253
MIF	P14174	0.833658	0.512461	23.6486	23.0037	22.8587	22.9299	22.6295	22.4143
STRAP	Q9Y3F4;Q9Y3F4-2	1.02205	0.512376	13.8954	14.4789	14.524	13.8511	13.5547	13.9553
HP1BP3	Q5SSJ5	0.594834	0.511297	12.9644	13.4798	12.5185	12.1256	12.9973	12.3059
SERPINB8	P50452	0.226826	0.510784	11.3081	11.7605	13.6575	12.7448	11.1594	11.2895
DDX46	Q7L014	0.988874	0.509913	16.3155	16.7052	15.8732	15.7618	15.7617	15.8406
NOB1	H3BUR4;Q9ULX3	0.687344	0.509454	12.7348	13.684	12.6537	12.4416	12.456	12.6464
USP7	A0A669KBL1;H3BND8;Q93009;Q93009-3	0.635094	0.50935	12.0922	12.0901	11.3015	11.1384	11.0086	11.8087
C8orf82	H0YF29;Q6P1X6;Q6P1X6-2	0.582887	0.507652	14.8495	13.6279	14.114	13.9925	13.4641	13.6117
TFB2M	Q9H5Q4	0.708999	0.506957	13.1416	14.1544	13.3153	12.8635	13.0388	13.1882
RPA1	P27694	1.97444	0.506026	14.0579	13.7228	13.8027	13.4431	13.2786	13.3437
USP39	A0A087X1B2;B9A018;Q53GS9;Q53GS9-2	0.419549	0.505139	11.9428	13.3687	11.7418	11.9047	11.7966	11.8366
CCS	J3KNF4;O14618	0.470983	0.502666	13.9135	15.3878	14.3669	13.877	13.9232	14.3601
SNRPD3	P62318;P62318-2	0.892208	0.501332	17.9355	18.0637	17.4108	17.5805	17.3301	16.9954
SRRT	A0A0A0MSP6;H7C3A1;Q9BXP5;Q9BXP5-2;Q9BXP5-3;Q9BXP5-4;Q9BXP5-5	0.289017	0.498237	13.0307	12.1279	11.2444	10.7048	12.0135	12.1899
ANXA2	P07355	3.11876	0.498157	19.9945	19.8534	19.8238	19.4052	19.3697	19.4024
RFC5	P40937;P40937-2	0.993501	0.497654	12.9339	13.7089	13.1673	12.7265	12.8723	12.7185
NASP	P49321;P49321-2;P49321-3	0.752696	0.496505	14.2385	14.0773	13.849	13.0032	13.9141	13.7579
SMYD5	Q6GMV2	0.989378	0.496161	14.6144	14.1733	14.9057	14.1467	13.8702	14.188
SH3PXD2B	A0A1B0GUF2;A1X283;G3V144	0.241502	0.495193	10.8763	10.4376	9.94482	10.7479	8.40061	10.6246
CTR9	Q6PD62	0.613182	0.494745	11.9574	12.7333	11.7209	11.3126	11.9847	11.63
HPRT1	P00492	0.838296	0.493371	15.6189	16.0569	15.1562	15.284	15.0368	15.0312
PGAM1	P18669	0.503682	0.491382	12.3128	11.8782	12.8335	11.3255	11.7795	12.4453
SRSF7	A0A0B4J1Z1;C9JAB2;Q16629;Q16629-2;Q16629-3;Q16629-4	0.972603	0.490896	17.8181	17.6705	17.0796	17.1598	17.0202	16.9155
PSMA4	H0YL69;H0YMZ1;H0YN18;P25789	1.56301	0.48893	13.5674	13.7192	13.5445	12.862	13.3027	13.1995
PHF5A	Q7RTV0	1.09638	0.488555	16.2241	16.1822	15.6429	15.3401	15.6363	15.6071
SRSF6;SRSF6;SRSF6;;SRSF6;SRSF6	A0A590UJK4;A0A590UJP7;A0A590UK01;A0A590UK80;Q13247;Q13247-3	0.614895	0.487501	17.6359	17.8005	16.6648	16.9391	16.8196	16.8799
MAT2B	Q9NZL9	1.3079	0.486867	15.939	15.5841	15.3789	15.2676	15.0799	15.0938
CDC37	K7EQA9;Q16543	1.15441	0.486239	13.5033	12.8977	13.2788	12.8069	12.5634	12.8508
GLRX	P35754	0.743005	0.483235	13.7427	13.6175	14.4019	13.4639	13.1257	13.7227
NUP133	Q8WUM0	1.23568	0.48212	14.9521	14.5186	15.0088	14.295	14.5333	14.2048
;VPS4B;FIGNL1;FIGNL1;VPS4A	I3L4J1;O75351;Q6PIW4;Q6PIW4-2;Q9UN37	1.38949	0.481342	14.97	14.6471	14.5047	14.3946	14.1293	14.1539
LYSMD2	Q8IV50	0.269029	0.480611	13.8475	15.7812	14.2074	13.766	13.7013	14.9269
TMOD3	H0YKU1;H0YNJ8;Q9NYL9	0.186952	0.480594	11.1672	9.97412	9.46766	8.62436	11.3794	9.16346
EIF3G	K7ENA8;O75821	1.45655	0.479436	15.1317	15.1333	14.8957	14.3225	14.6375	14.7623
BID	P55957;P55957-2	1.41344	0.479383	14.9398	15.0083	14.5894	14.1925	14.4127	14.4942
GDI2	P50395	0.23519	0.478419	11.7613	14.0623	14.1219	13.2125	12.6298	12.6679
TRIM65	Q6PJ69	0.982002	0.478113	15.1551	14.9454	14.5384	14.6534	14.174	14.3772
HNRNPA1	A0A7I2V3R8;F8W6I7;P09651;P09651-2;P09651-3	0.218477	0.477897	14.9582	17.0781	14.6111	14.4576	15.0458	15.7103
PELP1	C9JFV4;I3L1P4;I3L445;I3L4M7;Q8IZL8	0.614957	0.476644	12.3788	11.6419	11.3169	11.2038	11.597	11.1069
U2AF2	P26368;P26368-2	0.462232	0.472816	16.1632	17.235	15.9981	15.7125	15.8567	16.4085
SPRR1A	P35321	0.229817	0.471104	11.6684	13.7018	14.0186	13.2944	12.4211	12.2601
NOP9	A0A3B3ISH6;Q86U38;Q86U38-2	0.662805	0.469207	12.183	12.4103	11.8115	11.4098	12.2038	11.3835
SPRR2E	P22531	0.247641	0.467079	15.99	17.0347	17.4179	17.4904	16.1562	15.3948
CAMK2D	D6R938;E9PBG7;E9PF82;Q13557;Q13557-10;Q13557-11;Q13557-12;Q13557-3;Q13557-4;Q13557-5;Q13557-6;Q13557-8;Q13557-9	0.201417	0.465872	10.0214	11.1806	10.2499	8.44208	10.4257	11.1865
CHAF1B	Q13112	1.77655	0.465316	13.7883	13.5473	13.4485	13.1981	13.0089	13.1811
DNAJA2	O60884	0.993207	0.465215	13.934	13.4059	13.9593	13.1038	13.5337	13.2661
ERI1	Q8IV48	1.31668	0.464696	14.0479	14.2951	14.046	13.7727	13.8407	13.3816
HSP90AB1	P08238	2.28961	0.464548	17.4863	17.601	17.4979	16.922	17.0914	17.1782
SMU1	Q2TAY7	0.50196	0.463618	12.9944	14.0986	12.8749	12.6499	12.9319	12.9952
RUFY1	H0YA47;H0YAC8;Q96T51;Q96T51-2	0.216283	0.461826	9.48563	10.7446	9.55711	8.38725	9.17449	10.8402
SUPT5H	O00267;O00267-2	0.476303	0.461119	12.1034	11.328	10.7755	10.6884	11.2585	10.8767
SNRPA1	P09661	0.653835	0.46104	21.3576	22.0574	21.6626	21.0898	20.8935	21.7112
QARS1	P47897;P47897-2	2.32129	0.45919	13.7367	13.5178	13.6135	13.1186	13.2642	13.1077
TUBB	P07437;Q5JP53	1.50774	0.458052	19.6439	19.4351	19.1699	18.983	18.8979	18.9939
ADGRA3	Q8IWK6;Q8IWK6-2	0.848282	0.456525	19.0523	18.2673	18.6394	18.3957	18.0379	18.1557
ASPSCR1	C9JAL9;J3KRG1;J3QR50;J3QRW3;Q9BZE9;Q9BZE9-2	0.451505	0.450961	11.2593	10.5614	10.9093	11.1475	10.3935	9.83609
ASRGL1	A0A087WUG3;E9PJK6;Q7L266	0.735776	0.448755	12.6615	11.9611	12.7875	12.0124	12.2161	11.8354
JPT2	A6NGP5;H3BU16;Q9H910;Q9H910-2;Q9H910-3	0.36791	0.447745	13.8017	14.5415	12.8408	13.512	13.2621	13.0667
NUP85	F5H0W7;J3KT10;J3QL54;J3QL91;J3QLH0;J3QS63;Q9BW27;Q9BW27-2;Q9BW27-3	0.707007	0.446661	14.67	13.7039	14.1568	13.8548	13.7328	13.6031
UBR4	A0A0A0MSW0;Q5T4S7;Q5T4S7-2;Q5T4S7-3;Q5T4S7-4;Q5T4S7-5	0.452697	0.443661	11.7182	10.7656	11.3926	10.2179	11.2094	11.1181
SHC1	P29353;P29353-2;P29353-3;P29353-6;P29353-7	1.70845	0.442952	15.6184	15.6553	15.2912	15.044	15.0791	15.1131
DDOST	A0A0C4DGS1;P39656;P39656-2;P39656-3	0.578528	0.44133	14.3901	13.8763	14.4245	13.2407	14.2269	13.8992
RPS21	P63220;Q8WVC2	1.34945	0.438702	18.1343	18.1542	17.7357	17.6712	17.4422	17.5946
LAP3	P28838;P28838-2	0.0804073	0.437711	15.9178	11.686	9.36975	11.7588	12.1518	11.7498
SFPQ	P23246	0.357404	0.436982	13.6822	14.5744	13.1354	13.0679	13.9377	13.0753
CARM1	Q86X55;Q86X55-1	3.89739	0.436249	15.9773	15.9774	15.9323	15.4931	15.5083	15.5768
MFAP1	P55081	0.367534	0.434063	13.8578	14.3331	12.8136	12.8234	13.4117	13.4672
ENY2	E5RHX8;Q9NPA8;Q9NPA8-2	1.16243	0.433052	15.1002	15.0445	14.7443	14.7979	14.4357	14.3563
DYNLL1	P63167	0.257342	0.429253	16.1101	17.9654	16.2137	15.8305	16.3762	16.7948
PRDX1	Q06830	1.08021	0.425464	20.2512	19.7113	19.8712	19.6907	19.3711	19.4955
FOXK1	P85037	0.738032	0.425268	14.5247	13.8663	13.9326	13.9605	13.6855	13.4018
;;PCLAF;PCLAF;PCLAF	A0A0U1RQC1;A0A0U1RQM0;H0YMA4;Q15004;Q15004-2	0.731315	0.42474	13.6517	12.8448	13.4397	13.1048	12.7349	12.8222
LANCL3	Q6ZV70	1.00133	0.423822	13.7998	13.7826	13.2415	13.1937	13.0475	13.3113
EEF1A2	A0A2U3TZH3;Q05639	0.825333	0.421541	18.0077	17.3253	17.3794	17.2142	16.9718	17.2619
PHB2	Q99623	0.804825	0.419758	15.9074	15.6001	16.1061	15.281	15.8328	15.2406
PHGDH	A0A286YF22;O43175	1.83319	0.419726	16.1748	15.9101	15.9285	15.5808	15.6835	15.49
PDP1	Q9P0J1;Q9P0J1-2	1.88215	0.41936	14.2	14.0803	14.0969	13.5412	13.7219	13.856
EIF4A1	P60842	1.46694	0.419177	16.1411	16.3767	15.9358	15.7993	15.6727	15.724
PSMC6	A0A087X2I1;P62333	0.537838	0.418892	13.2919	12.855	13.6391	13.1275	13.0741	12.3277
ESYT1	Q9BSJ8;Q9BSJ8-2	0.398502	0.418639	11.6301	11.8212	11.5981	10.4248	11.9057	11.463
HNRNPA0	Q13151	0.258173	0.418223	14.0447	16.0131	14.1241	14.3845	14.3017	14.2411
SNRNP70	P08621;P08621-2	0.814629	0.414821	16.4552	16.0566	15.7808	15.921	15.4681	15.6591
PFN2	G5E9Q6;P35080-2	0.939981	0.414364	19.5137	19.5021	18.8899	18.8773	18.8821	18.9033
ILVBL	A1L0T0;M0R026	0.885106	0.4143	13.008	12.5214	12.7079	12.5399	12.4505	12.004
SDE2	Q6IQ49;Q6IQ49-2	0.270518	0.412995	16.1156	17.7055	15.7917	15.852	16.1325	16.3893
EIF2B3	Q9NR50;Q9NR50-2;Q9NR50-3	0.748288	0.41247	13.1001	12.5595	12.3168	12.4491	12.1692	12.1206
NCAPD2	Q15021	0.677893	0.411012	17.2702	16.5723	16.9432	16.1425	16.7191	16.6911
CPOX	P36551	2.32855	0.410985	16.3	16.0863	16.095	15.7441	15.7209	15.7833
YTHDF2	Q9Y5A9;Q9Y5A9-2	0.588468	0.41051	12.7543	13.6796	12.8719	12.8966	12.513	12.6646
COX17	Q14061	0.423258	0.407429	16.4299	16.4815	15.5314	16.2743	15.5545	15.3917
SMC2	O95347;O95347-2;Q5T821	0.282683	0.40596	11.5608	10.4764	11.4064	11.2327	11.189	9.8041
TUBA3C;TUBA3D	P0DPH7;P0DPH8	0.857528	0.40583	16.5792	16.1032	16.6853	16.2854	16.0193	15.8455
MSL1	J3KSZ8;J3QQY0;Q68DK7	0.298562	0.405034	12.1284	11.8328	11.1872	11.559	10.3921	11.9821
FAM120B	A0A0D9SEJ5;F5GY05;Q96EK7	1.13844	0.404901	13.3986	13.3966	13.2684	13.2324	12.6726	12.9439
LMNB2	Q03252	0.935487	0.404791	13.4129	12.825	13.2874	12.6952	12.9585	12.6573
LAMTOR5	A0A0C4DGV4;E9PLX3;O43504;R4GMU8	0.611653	0.404494	13.9211	13.0942	13.7349	13.3166	12.8615	13.3587
NANP	Q8TBE9	0.323844	0.402439	13.6955	12.8188	11.9609	12.6177	12.3064	12.3438
STARD7	Q9NQZ5	0.850307	0.401738	14.833	14.4033	14.1045	14.0169	14.1584	13.9603
RPN2	P04844;P04844-2	1.03884	0.401585	14.2082	14.2927	14.4172	13.7572	14.2456	13.7106
PUS1	F5H1S9;G8JLB3;Q9Y606;Q9Y606-2	0.852364	0.400758	14.4321	14.0799	13.7517	13.5273	13.6764	13.8577
TUBA1C	F5H5D3;Q9BQE3	0.781103	0.400737	16.0144	15.2691	15.8632	15.4173	15.333	15.1942
SND1	Q7KZF4	0.434991	0.400061	14.5157	15.2172	13.869	14.0715	14.2544	14.0757
GNB1L	Q9BYB4	1.29884	0.399117	16.0078	15.6486	15.626	15.3987	15.2195	15.4669
RTCA	O00442;O00442-2	0.277605	0.398864	12.2969	13.454	11.6366	11.6322	12.1599	12.3988
NT5DC2	Q9H857-2;Q9H857-3	2.03407	0.398666	14.5003	14.6738	14.5392	14.0941	14.1188	14.3044
ACTR3	P61158	0.931911	0.396515	15.2273	14.5861	15.0382	14.6701	14.4983	14.4935
NUP107	P57740	1.18765	0.395623	12.8854	12.7382	12.6636	12.0972	12.4219	12.5812
CPSF1	Q10570	0.543367	0.394827	12.3251	12.0597	11.5575	12.039	11.4171	11.3017
PAF1	Q8N7H5;Q8N7H5-3	0.715958	0.393321	12.3563	12.9209	12.3236	11.8632	12.1417	12.416
UBE2N	P61088	1.23622	0.391961	15.0575	15.1503	14.6995	14.5781	14.4774	14.676
KLK11	M0QYW4;M0R151;Q9UBX7;Q9UBX7-1;Q9UBX7-3;Q9UBX7-4	0.539496	0.391879	17.7578	16.743	17.4138	17.1076	16.9326	16.6988
MAPK8	P45983-3;P45983-4	0.683329	0.390878	13.8135	13.047	13.047	12.9955	12.8263	12.9129
EARS2	Q5JPH6	1.40091	0.38976	13.0667	13.1654	12.9247	12.4535	12.8223	12.7118
CSK	P41240	1.13667	0.388605	16.4364	15.9592	16.0541	15.8446	15.6273	15.8119
U2AF1	Q01081	0.604406	0.38668	16.5047	16.8841	16.1437	15.8758	15.997	16.4997
MYL6	F8W1R7;G3V1V0;P60660;P60660-2	1.11775	0.385985	15.7465	15.6049	15.2415	15.2079	15.0224	15.2046
ERP44	Q9BS26	2.8093	0.385477	15.3022	15.3131	15.183	14.9363	14.8585	14.847
SNRPGP15;SNRPG;SNRPG;SNRPG	A8MWD9;F5H013;P62308;Q49AN9	0.985567	0.385375	18.3588	17.9319	17.9118	17.9019	17.6017	17.5428
SDHA	D6RFM5;P31040;P31040-2	1.46873	0.383315	15.0976	14.8533	14.7399	14.5568	14.3963	14.5877
PRDX3	P30048;P30048-2	2.34281	0.381449	18.569	18.7415	18.5515	18.2248	18.2014	18.2914
PRSS1	A6XGL3;E7EQ64;P07477	1.7934	0.379554	21.6539	21.9632	21.7259	21.4273	21.405	21.3721
TUBB4B	P68371	1.42544	0.379473	20.3106	20.0006	19.9033	19.715	19.6607	19.7004
TUBG1;TUBG2	P23258;Q9NRH3	0.285164	0.378704	13.0768	12.337	12.2552	12.9142	11.3102	12.3085
EIF5A	I3L397;I3L504;P63241	1.50975	0.377262	15.9463	16.2413	15.9097	15.7027	15.5586	15.7042
HSD17B10	Q99714	1.09189	0.373941	16.8501	16.3232	16.4756	16.2149	16.1004	16.2117
ASNS	P08243;P08243-2	1.98389	0.372284	15.4327	15.4674	15.2687	14.912	15.0911	15.0489
ABCF3	Q9NUQ8;Q9NUQ8-2	0.528568	0.370823	15.273	14.3594	14.6929	14.7111	14.2086	14.2931
GTF3C5	Q5T7U1;Q9Y5Q8;Q9Y5Q8-2;Q9Y5Q8-3	0.101343	0.370428	11.2769	13.428	9.39103	9.88531	11.1375	11.9619
PSMB3	A0A087WUL2;A0A087WXQ8;A0A087WY10;P49720	0.320545	0.368905	12.0052	12.7748	13.0521	12.8255	12.2938	11.6061
SPAG7	O75391	0.86096	0.367891	11.618	11.7623	11.8664	11.1165	11.2889	11.7378
RPL36AL	Q969Q0	1.16396	0.367153	14.386	14.5992	14.6619	13.9623	14.1971	14.3862
POLRMT	O00411	1.73529	0.366511	11.9404	12.1302	11.9534	11.6621	11.7565	11.5058
RPL22;;RPL22;RPL22;RPL22;RPL22;RPL22	K7EJT5;K7EKS7;K7ELC4;K7EMH1;K7EP65;K7ERI7;P35268	0.262308	0.364958	15.2689	16.4416	14.9688	14.5629	15.6466	15.3749
NUP93	Q8N1F7;Q8N1F7-2	0.556681	0.364877	14.1789	14.5487	13.6104	13.5881	13.724	13.9313
GTF3C3	A0A494C1S7;H7C143;Q9Y5Q9;Q9Y5Q9-2	0.188336	0.36469	12.2334	11.5492	9.75901	10.8011	10.7145	10.9319
TFCP2	F8VWL0;F8VX55;Q12800;Q12800-2;Q12800-3;Q12800-4	0.520252	0.364433	14.5115	13.544	13.7436	13.544	13.7313	13.4306
ZNF618	Q5T7W0;Q5T7W0-2;Q5T7W0-4	0.376748	0.3642	12.8344	12.8406	11.9988	11.6653	12.235	12.6808
CAPRIN1	Q14444;Q14444-2	0.496696	0.364066	14.8785	15.0523	14.0911	14.4223	14.0662	14.4412
RBM14	Q96PK6	0.345216	0.362527	14.1341	14.9388	13.4719	13.7111	14.0132	13.7329
SNTB2	A0A140TA73;Q13425;Q13425-2	0.336172	0.361104	14.5151	13.6995	14.0554	14.2495	13.937	13.0002
BAG2	O95816	0.795146	0.35967	14.173	13.998	13.5898	13.7534	13.5803	13.3481
APIP	Q96GX9	2.30955	0.358056	14.4928	14.6234	14.517	14.2717	14.1006	14.1867
LRBA	A0A494BZW2;A0A494C1L5;E9PEM5;H0YAC6;P50851;P50851-2	0.656158	0.356609	12.294	12.3636	12.65	11.7022	12.4659	12.0696
KRT6C	P48668	0.0933008	0.355786	9.86678	13.9525	13.8547	11.8305	12.5244	12.2518
MRPL41	Q8IXM3	0.321491	0.355117	11.5645	12.2611	12.1233	12.315	11.6387	10.9298
PLK1	P53350	0.733973	0.35313	13.0943	13.5682	13.1412	12.6337	12.9198	13.1909
XRCC5	P13010	2.61042	0.349252	15.7517	15.6278	15.7151	15.3792	15.2773	15.3903
MPP7	Q5T2T1	0.157943	0.34883	13.8165	13.394	11.1612	12.5934	12.3165	12.4153
ARPC4-TTLL3;ARPC4-TTLL3;ARPC4;ARPC4-TTLL3;ARPC4;ARPC4;ARPC4	A0A0A6YYG9;F8WCF6;F8WDD7;H7C0A3;P59998;P59998-2;P59998-3	0.772646	0.346636	14.1464	13.666	13.7471	13.7428	13.5303	13.2465
SEPTIN9	Q9UHD8;Q9UHD8-2;Q9UHD8-3;Q9UHD8-5;Q9UHD8-7	1.47377	0.345006	14.2542	14.2257	13.9202	13.8252	13.7632	13.7766
LRRC59	Q96AG4	0.204494	0.342828	14.5017	16.407	15.375	14.4637	15.6371	15.1543
POLR3K	Q9Y2Y1	1.14401	0.342453	14.2825	14.7589	14.5816	14.2431	14.1741	14.1785
SNRPN;SNRPB;SNRPB;SNRPB;SNRPN;SNRPN	J3QLE5;P14678;P14678-2;P14678-3;P63162;P63162-2	0.932695	0.34155	16.2879	16.2253	15.7474	15.7678	15.7226	15.7455
POLR2A	A0A6Q8PGB0;P24928	2.14413	0.338572	12.1873	12.0298	12.2169	11.8123	11.7457	11.8603
FLYWCH2	I3L1Y9;Q96CP2	0.543224	0.337931	14.2576	13.5302	13.8268	13.798	13.6026	13.2003
LSM12	Q3MHD2;Q3MHD2-2	0.643393	0.337632	15.4169	15.226	14.8038	15.1068	14.5966	14.7303
CRKL	P46109	0.803569	0.335651	19.3122	19.0483	18.8059	18.7831	18.4766	18.8998
MAP1S	Q66K74;Q66K74-2	0.576297	0.335606	12.5987	12.1458	11.9279	11.9307	12.1561	11.5788
DCD	P81605;P81605-2	0.807115	0.334723	15.4321	15.9077	15.3026	15.3137	15.1969	15.1275
ZWILCH	Q9H900;Q9H900-2	0.487161	0.333019	13.1011	13.8412	13.0614	12.6922	13.1872	13.1252
POLR2B	C9J2Y9;P30876	0.706177	0.332545	13.3054	12.6961	13.1927	12.5437	12.9092	12.7437
CPNE3	O75131	1.09549	0.331067	14.2864	14.6515	14.4976	14.0018	14.3255	14.115
IDE	A0A3B3ISG5;A0A7I2V2P6;A0A7I2V3E3;A0A7I2V610;P14735	0.277132	0.330255	13.0972	14.6576	14.3011	13.6103	13.8486	13.6063
ANXA7	P20073;P20073-2	0.355001	0.330133	14.3098	13.5423	14.446	14.2983	13.547	13.4625
KPNA3	O00505	0.177089	0.330098	11.515	11.6203	12.2489	10.2434	11.5997	12.5508
PDS5A	Q29RF7	0.829148	0.329819	13.7412	13.519	13.576	12.948	13.5195	13.3792
PDIA6	Q15084;Q15084-2;Q15084-3;Q15084-4;Q15084-5	0.450548	0.328251	18.14	17.5776	17.8388	17.9164	17.0109	17.6444
SNRPE	P62304	0.779318	0.327206	17.2706	17.0854	16.9875	17.1304	16.6745	16.557
RRP1	P56182	0.206339	0.325521	12.7718	14.1693	12.9361	12.146	13.542	13.2126
KDM1A	O60341;O60341-2;R4GMQ1	0.963414	0.325411	13.7222	13.3851	13.7547	13.4383	13.3572	13.0902
PSMC5	P62195;P62195-2	0.986915	0.32365	13.6298	13.8751	13.6603	13.2931	13.6622	13.239
NUP153	P49790;P49790-2;P49790-3	0.682308	0.322904	12.1638	12.8141	12.2355	12.0194	12.0186	12.2067
IREB2	P48200	0.288115	0.322176	12.5169	13.4241	12.635	11.8411	12.8057	12.9627
TRAP1	Q12931;Q12931-2	1.89039	0.321532	14.0339	13.99	14.1251	13.7525	13.6075	13.8243
COPG1	Q9Y678	0.878204	0.320566	12.9332	13.0498	12.7782	12.4419	12.9011	12.4565
FXR1	P51114;P51114-2	0.516102	0.319596	14.2787	13.9302	13.5531	13.2639	13.7024	13.8369
CLTC	A0A087WVQ6;Q00610;Q00610-2	1.49995	0.318417	17.1835	16.8954	17.0176	16.6403	16.8137	16.6872
;ATP5MG;ATP5MG	A0A3B3ITX4;E9PN17;O75964	0.47	0.318247	14.7503	14.381	14.5338	13.8832	14.7739	14.0533
AURKA	O14965	1.60694	0.317494	14.0022	13.7928	13.9175	13.5197	13.5196	13.7207
XRCC6	B1AHC9;P12956	0.490062	0.316399	15.3376	15.9185	15.2265	14.8407	15.2283	15.4645
DCTD	P32321;P32321-2	0.670924	0.315692	13.9661	13.4212	13.3754	13.3842	13.0768	13.3547
GSPT1	P15170-2;P15170-3	0.6406	0.315033	15.0398	14.4049	14.7312	14.6418	14.2123	14.3768
PPM1G	O15355	0.542704	0.314911	14.0088	13.2506	13.8382	13.3305	13.2195	13.6029
GATD3B;;GATD3B;GATD3B;GATD3;GATD3	A0A096LNH5;A0A096LPI6;A0A0B4J2D5;A0A0B4J2D5-2;P0DPI2;P0DPI2-2	0.298592	0.314649	12.5499	12.565	11.6582	11.7685	11.5239	12.5368
SRSF10	O75494;O75494-2;O75494-3;O75494-4;O75494-5;O75494-6;Q5JRI1	0.541966	0.314116	15.1617	15.3086	14.5071	14.8009	14.5599	14.6743
SH3GL1	Q99961	1.04932	0.312389	15.3619	15.5289	15.0622	15.0287	14.945	15.0421
GPI	A0A2U3TZU2;P06744;P06744-2	0.468188	0.312362	10.9622	11.7872	11.1877	10.8834	10.8171	11.2995
RRM2	P31350	0.535678	0.311832	14.4745	15.2451	14.5761	14.3096	14.4421	14.6085
ALYREF	Q86V81	0.136017	0.310932	14.7221	16.8857	14.4018	14.4053	15.4793	15.1922
UBA1	P22314;P22314-2	0.815533	0.309416	14.9109	14.3926	14.4124	14.3489	14.1926	14.2462
SNRNP27	B8ZZ98;Q8WVK2	0.0403025	0.309005	10.2862	15.907	8.92627	8.40955	12.828	12.9549
SAFB	Q15424;Q15424-2;Q15424-3;Q15424-4	0.387749	0.308727	13.9167	13.5738	13.3223	13.0553	13.8688	12.9625
SLC3A2	A0A7P0T9F7;A0A7P0TAN7;A0A7P0TBF8;A0A7P0Z4A0;A0A7P0Z4P5;F5GZI0;F5GZS6;F5H056;J3KPF3;P08195;P08195-2;P08195-3;P08195-4	0.222517	0.308241	13.7607	15.0023	14.6041	13.3855	14.7272	14.3296
ABRACL	Q5SZC9;Q9P1F3	0.610947	0.30523	15.975	15.2736	15.5512	15.4484	15.3087	15.1271
MCM3	P25205	0.996417	0.304967	17.4517	17.5627	17.1566	16.9619	17.0676	17.2266
MRPL10	Q7Z7H8;Q7Z7H8-2	0.235832	0.303568	11.0438	10.2796	11.4932	11.0841	10.9019	9.91992
[truncated: 1,209 more rows]

## Sheet: CSA +UV vs WT +UV
Gene names	Protein IDs	-Log t-test p value	t-test Difference	CSAmClover +UV Intensity (Log2) experiment 1	CSAmClover +UV Intensity (Log2) experiment 2	CSAmClover +UV Intensity (Log2) experiment 3	WT +UV Intensity (Log2) experiment 1	WT +UV Intensity (Log2) experiment 2	WT +UV Intensity (Log2) experiment 3
[truncated: 1,783 more rows]
