# Supplementary material for: The small CRL4CSA ubiquitin ligase component DDA1 regulates transcription-coupled repair dynamics
Source: Nat Commun. 2024 Jul 29;15:6374. doi: 10.1038/s41467-024-50584-7 (PMC11286758; doi:10.1038/s41467-024-50584-7)
Supplement: Supplementary file 11 — Supplementary Data 8 [file 41467_2024_50584_MOESM11_ESM.xlsx]

## Sheet: Sheet1
Protein	Protein names	Gene names	Positions within proteins	Ratio H/L normalized WT(H)+UV vs WT(L) Experiment 1	Ratio H/L normalized WT(H)+UV vs WT(L) Experiment 2	Ratio H/L normalized CSAKO(H)+UV vs CSAKO(L) Experiment 1	Ratio H/L normalized CSAKO(H)+UV vs CSAKO(L) Experiment 2	Ratio H/L normalized DDA1KO(H)+UV vs DDA1KO(L) Experiment 1	Ratio H/L normalized DDA1KO(H)+UV vs DDA1KO(L) Experiment 2	Ratio H/L normalized CSAKO(H) vs WT(L) Experiment 1	Ratio H/L normalized CSAKO(H) vs WT(L) Experiment 2	Ratio H/L normalized DDA1KO(H) vs WT(L) Experiment 1	Ratio H/L normalized DDA1KO(H) vs WT(L) Experiment 2	Proteins	Positions within proteins	Leading proteins	Protein	Protein names	Gene names	Fasta headers	Localization prob	Score diff	PEP	Score	Delta score	Score for localization	Localization prob CSA L VS CSA H +UV A	Score diff CSA L VS CSA H +UV A	PEP CSA L VS CSA H +UV A	Score CSA L VS CSA H +UV A	Localization prob CSA L VS CSA H +UV B	Score diff CSA L VS CSA H +UV B	PEP CSA L VS CSA H +UV B	Score CSA L VS CSA H +UV B	Localization prob DDA1 L VS DDA1 H +UV A	Score diff DDA1 L VS DDA1 H +UV A	PEP DDA1 L VS DDA1 H +UV A	Score DDA1 L VS DDA1 H +UV A	Localization prob DDA1 L VS DDA1 H +UV B	Score diff DDA1 L VS DDA1 H +UV B	PEP DDA1 L VS DDA1 H +UV B	Score DDA1 L VS DDA1 H +UV B	Localization prob WT L vs CSA H A	Score diff WT L vs CSA H A	PEP WT L vs CSA H A	Score WT L vs CSA H A	Localization prob WT L vs CSA H B	Score diff WT L vs CSA H B	PEP WT L vs CSA H B
P34896	Serine hydroxymethyltransferase, cytosolic	SHMT1	416		78.43		90.935				2.8179			P34896	416	P34896	P34896	Serine hydroxymethyltransferase, cytosolic	SHMT1	sp|P34896|GLYC_HUMAN Serine hydroxymethyltransferase, cytosolic OS=Homo sapiens OX=9606 GN=SHMT1 PE=1 SV=1	0.985413	18.2965	0.0157603	61.999	2.794	32.415					0.946907	12.5127	0.0613028	29.743	0.798818	5.9886	0.0627015	61.999									0.957798	13.5594	0.0157603
Q01831	DNA repair protein complementing XP-C cells	XPC	364	50.207	47.946									Q01831	364	Q01831	Q01831	DNA repair protein complementing XP-C cells	XPC	sp|Q01831|XPC_HUMAN DNA repair protein complementing XP-C cells OS=Homo sapiens OX=9606 GN=XPC PE=1 SV=4	0.998955	30.6603	6.41643e-159	242.71	242.71	242.71
P18074	TFIIH basal transcription factor complex helicase XPD subunit	ERCC2	751	30.151	27.895	37.696								P18074	751	P18074	P18074	TFIIH basal transcription factor complex helicase XPD subunit	ERCC2	sp|P18074|ERCC2_HUMAN General transcription and DNA repair factor IIH helicase subunit XPD OS=Homo sapiens OX=9606 GN=ERCC2 PE=1 SV=1	1	233.887	1.83369e-128	233.89	233.89	233.89	1	167.239	8.97996e-68	167.24
O75533	Splicing factor 3B subunit 1	SF3B1	1014	27.904	38.302	42.688	51.317	37.099	35.871	55.453	56.128			O75533	1014	O75533	O75533	Splicing factor 3B subunit 1	SF3B1	sp|O75533|SF3B1_HUMAN Splicing factor 3B subunit 1 OS=Homo sapiens OX=9606 GN=SF3B1 PE=1 SV=3	1	42.8094	0.00284581	66.262	50.723	42.809	1	66.2625	0.00284581	66.262	1	66.2625	0.00284581	66.262	1	36.3204	0.0361905	36.32	1	42.8094	0.0191263	42.809	1	66.2625	0.00284581	66.262	1	35.5941	0.0387048
Q01831	DNA repair protein complementing XP-C cells	XPC	374	26.913	41.815	34.742	28.172				0.84001			Q01831	374	Q01831	Q01831	DNA repair protein complementing XP-C cells	XPC	sp|Q01831|XPC_HUMAN DNA repair protein complementing XP-C cells OS=Homo sapiens OX=9606 GN=XPC PE=1 SV=4	1	93.8391	4.62817e-27	142.55	142.55	93.839	0.999923	41.1208	4.62817e-27	142.55	0.987226	18.8808	0.0422716	29.077													0.953893	13.1573	0.0317618
Q9BY77	Polymerase delta-interacting protein 3	POLDIP3	223	25.329				37.361						Q9BY77	223	Q9BY77	Q9BY77	Polymerase delta-interacting protein 3	POLDIP3	sp|Q9BY77|PDIP3_HUMAN Polymerase delta-interacting protein 3 OS=Homo sapiens OX=9606 GN=POLDIP3 PE=1 SV=2	0.999923	41.1185	0.00975478	49.632	36.495	49.632									0.999923	41.1185	0.00975478	49.632
Q01831	DNA repair protein complementing XP-C cells	XPC	359	22.703	21.573	26.127					0.8383	1.065		Q01831	359	Q01831	Q01831	DNA repair protein complementing XP-C cells	XPC	sp|Q01831|XPC_HUMAN DNA repair protein complementing XP-C cells OS=Homo sapiens OX=9606 GN=XPC PE=1 SV=4	0.977648	16.4087	1.09011e-225	283.88	265.37	119.01	0.874575	8.43414	3.14821e-113	213.45																	0.806109	6.18835	0.000509761
Q9NRZ9	Lymphoid-specific helicase	HELLS	204	21.449	10.019		14.597			16.005				Q9NRZ9	204	Q9NRZ9	Q9NRZ9	Lymphoid-specific helicase	HELLS	sp|Q9NRZ9|HELLS_HUMAN Lymphoid-specific helicase OS=Homo sapiens OX=9606 GN=HELLS PE=1 SV=1	0.999996	53.9119	0.00365699	54.023	39.67	54.023					0.998294	27.6725	0.0513243	27.672									0.999996	53.9119	0.00365699	54.023
Q7L2H7	Eukaryotic translation initiation factor 3 subunit M	EIF3M	177		19.986		27.787	9.1649						Q7L2H7	177	Q7L2H7	Q7L2H7	Eukaryotic translation initiation factor 3 subunit M	EIF3M	sp|Q7L2H7|EIF3M_HUMAN Eukaryotic translation initiation factor 3 subunit M OS=Homo sapiens OX=9606 GN=EIF3M PE=1 SV=1	0.539968	0.695792	0.00795732	77.677	56.171	47.288					0.537832	0.65847	0.0117771	45.915	0.5	0	0.00795732	77.677
Q03519	Antigen peptide transporter 2	TAP2	245;245	19.647	10.335	8.5979		9.274	8.1014		15.255	0.67598	0.70717	Q03519;E7ENX8	245;245	Q03519	Q03519	Antigen peptide transporter 2	TAP2	sp|Q03519|TAP2_HUMAN Antigen peptide transporter 2 OS=Homo sapiens OX=9606 GN=TAP2 PE=1 SV=1;tr|E7ENX8|E7ENX8_HUMAN Uncharacterized protein (Fragment) OS=Homo sapiens OX=9606 PE=3 SV=1	1	70.9421	8.3823e-110	208.85	183.26	70.942	1	185.71	7.94718e-76	185.71					1	163.561	4.10381e-49	163.56	1	70.9421	0.000161876	70.942					1	208.847	8.3823e-110
Q15650	Activating signal cointegrator 1	TRIP4	245	12.965	9.7714			7.6764		0.75334				Q15650	245	Q15650	Q15650	Activating signal cointegrator 1	TRIP4	sp|Q15650|TRIP4_HUMAN Activating signal cointegrator 1 OS=Homo sapiens OX=9606 GN=TRIP4 PE=1 SV=4	1	28.0893	1.26446e-05	77.746	77.746	28.089									1	77.7461	1.26446e-05	77.746					1	52.254	0.00295433	52.254
P25787	Proteasome subunit alpha type-2	PSMA2	171	10.944	2.8882	9.8796	1.776	2.6434	0.7012	3.0373	2.5528			P25787	171	P25787	P25787	Proteasome subunit alpha type-2	PSMA2	sp|P25787|PSA2_HUMAN Proteasome subunit alpha type-2 OS=Homo sapiens OX=9606 GN=PSMA2 PE=1 SV=2	0.999961	44.1362	2.32253e-27	148.96	100.16	73.435	0.999387	32.1227	4.1549e-05	111.06	0.999692	35.1152	0.00265789	54.259	0.999204	30.9852	0.0062403	70.1	0.998684	28.8028	0.00716104	39.413	0.999929	41.4924	2.32253e-27	148.96	0.999961	44.1362	0.000522906
P62191	26S protease regulatory subunit 4	PSMC1	413	10.79	13.212	9.2664	14.68	10.424	6.4296	15.455	5.3209			P62191	413	P62191	P62191	26S protease regulatory subunit 4	PSMC1	sp|P62191|PRS4_HUMAN 26S proteasome regulatory subunit 4 OS=Homo sapiens OX=9606 GN=PSMC1 PE=1 SV=1	1	118.582	3.055e-13	128.27	115.65	128.27	1	105.572	1.74127e-07	116.3	1	97.6542	9.73638e-06	109.29	1	118.582	3.055e-13	128.27	1	101.099	9.46531e-09	120.45	1	92.8706	7.43173e-05	103.7	1	83.0085	0.000880235
Q9Y2S6	Translation machinery-associated protein 7	TMA7	30	10.583	4.9659			3.2121	3.8874					Q9Y2S6	30	Q9Y2S6	Q9Y2S6	Translation machinery-associated protein 7	TMA7	sp|Q9Y2S6|TMA7_HUMAN Translation machinery-associated protein 7 OS=Homo sapiens OX=9606 GN=TMA7 PE=1 SV=1	0.999928	41.4414	1.05715e-22	178.08	178.08	178.08									0.987299	20.3477	0.0035975	44.024	0.575167	1.73875	0.0607813	16.838
Q8N3C0	Activating signal cointegrator 1 complex subunit 3	ASCC3	2202	9.9023					15.452					Q8N3C0	2202	Q8N3C0	Q8N3C0	Activating signal cointegrator 1 complex subunit 3	ASCC3	sp|Q8N3C0|ASCC3_HUMAN Activating signal cointegrator 1 complex subunit 3 OS=Homo sapiens OX=9606 GN=ASCC3 PE=1 SV=3	1	237.441	6.16605e-84	237.44	160.61	237.44													1	237.441	6.16605e-84	237.44
P11142	Heat shock cognate 71 kDa protein;Heat shock-related 70 kDa protein 2	HSPA8;HSPA2	500;503	7.6254	5.9103	10.417	5.0167	5.2092	3.8677	8.0471	9.0767			P11142;P54652	500;503	P11142;P54652	P11142	Heat shock cognate 71 kDa protein;Heat shock-related 70 kDa protein 2	HSPA8;HSPA2	sp|P11142|HSP7C_HUMAN Heat shock cognate 71 kDa protein OS=Homo sapiens OX=9606 GN=HSPA8 PE=1 SV=1;sp|P54652|HSP72_HUMAN Heat shock-related 70 kDa protein 2 OS=Homo sapiens OX=9606 GN=HSPA2 PE=1 SV=1	1	45.257	2.18311e-62	187.5	140.51	45.257	1	100.022	3.27327e-08	122.96	1	42.0307	2.78147e-37	163.91	1	51.841	8.54204e-49	172.59	1	105.092	4.745e-13	134.51	1	76.0727	2.18311e-62	187.5	1	45.257	2.88791e-19
P67809	Nuclease-sensitive element-binding protein 1	YBX1	118	7.2623	3.8902	9.5455	7.0068		8.921	0.54199	0.60342			P67809	118	P67809	P67809	Nuclease-sensitive element-binding protein 1	YBX1	sp|P67809|YBOX1_HUMAN Nuclease-sensitive element-binding protein 1 OS=Homo sapiens OX=9606 GN=YBX1 PE=1 SV=3	1	145.309	1.22521e-94	145.31	141.39	145.31	1	78.6265	4.30345e-36	101.58	1	70.4824	1.22601e-20	74.605					1	83.3247	2.08412e-36	103.15	1	65.8489	1.24925e-20	74.446	1	69.5937	7.42677e-21
P24928	DNA-directed RNA polymerase II subunit RPB1	POLR2A	1268	6.8697	5.1776	4.266	3.7388	5.9467	6.5611	0.53055	0.41774	0.53211	0.82576	P24928	1268	P24928	P24928	DNA-directed RNA polymerase II subunit RPB1	POLR2A	sp|P24928|RPB1_HUMAN DNA-directed RNA polymerase II subunit RPB1 OS=Homo sapiens OX=9606 GN=POLR2A PE=1 SV=2	1	179.775	0	314.05	314.05	314.05	1	167.283	4.33032e-241	281.49	1	134.053	8.58418e-178	255.68	1	179.775	0	314.05	1	126.422	2.74452e-87	202.49	1	96.6189	3.5227e-64	158.15	1	111.41	8.84831e-88
P53396	ATP-citrate synthase	ACLY	1077	6.5568	8.0439	4.0297	5.373	2.7714		4.1153		1.2951	1.4558	P53396	1077	P53396	P53396	ATP-citrate synthase	ACLY	sp|P53396|ACLY_HUMAN ATP-citrate synthase OS=Homo sapiens OX=9606 GN=ACLY PE=1 SV=3	1	70.6216	8.057e-05	110.31	110.31	70.622	1	69.92	0.000875118	69.92	1	70.6216	0.000792863	70.622	1	70.8885	0.000761575	70.889					1	69.1076	0.000970353	69.108
P24928	DNA-directed RNA polymerase II subunit RPB1	POLR2A	1350	6.2484	5.1436	5.3004	5.3277	5.4189	4.7079	0.89643	1.1374	1.1652	1.0732	P24928	1350	P24928	P24928	DNA-directed RNA polymerase II subunit RPB1	POLR2A	sp|P24928|RPB1_HUMAN DNA-directed RNA polymerase II subunit RPB1 OS=Homo sapiens OX=9606 GN=POLR2A PE=1 SV=2	1	45.9154	6.70021e-06	117.86	95.628	45.915	1	88.1865	8.87149e-05	88.187	1	103.255	2.64439e-05	103.26	1	117.86	1.0339e-05	117.86	1	45.9154	0.0715049	45.915	1	50.2074	0.00311197	50.207	1	67.4565	0.00120242
Q05086	Ubiquitin-protein ligase E3A	UBE3A	350	6.0505								1.0506	1.0503	Q05086	350	Q05086	Q05086	Ubiquitin-protein ligase E3A	UBE3A	sp|Q05086|UBE3A_HUMAN Ubiquitin-protein ligase E3A OS=Homo sapiens OX=9606 GN=UBE3A PE=1 SV=4	1	49.0886	9.25989e-12	137.89	137.89	49.089
Q15046	Lysine--tRNA ligase	KARS	305	9.047	6.6093	2.4622								Q15046	305	Q15046	Q15046	Lysine--tRNA ligase	KARS	sp|Q15046|SYK_HUMAN Lysine--tRNA ligase OS=Homo sapiens OX=9606 GN=KARS PE=1 SV=3	1	29.6865	0.0251681	33.872	26.814	29.687	1	33.3079	0.0267445	33.308
O15304	Apoptosis regulatory protein Siva	SIVA1	41	5.9441		5.9256	3.1951	12.071		2.9812				O15304	41	O15304	O15304	Apoptosis regulatory protein Siva	SIVA1	sp|O15304|SIVA_HUMAN Apoptosis regulatory protein Siva OS=Homo sapiens OX=9606 GN=SIVA1 PE=1 SV=2	0.919832	10.5971	0.00166526	99.973	65.72	86.879	0.740134	4.54562	0.00166526	99.973	0.880217	8.66196	0.0180426	77.288	0.713866	3.97048	0.0114836	49.632					0.919832	10.5971	0.0104635	86.879
Q9UKX7	Nuclear pore complex protein Nup50	NUP50	59	5.9085	1.2789	1.0318	1.1975	1.1657		9.7207	1.7446	0.90904		Q9UKX7	59	Q9UKX7	Q9UKX7	Nuclear pore complex protein Nup50	NUP50	sp|Q9UKX7|NUP50_HUMAN Nuclear pore complex protein Nup50 OS=Homo sapiens OX=9606 GN=NUP50 PE=1 SV=2	0.999892	39.6817	1.1422e-24	164.48	126.77	135.8	0.843586	7.31853	0.000939239	41.412	0.5	0	9.12512e-07	78.191	0.843305	7.30928	5.90006e-18	120.7					0.877773	8.56213	3.59909e-09	99.215	0.839678	7.1912	2.52663e-05
Q14980	Nuclear mitotic apparatus protein 1	NUMA1	1475	5.6715		1.3675	5.4543	2.5678	6.2877	1.8759	11.713			Q14980	1475	Q14980	Q14980	Nuclear mitotic apparatus protein 1	NUMA1	sp|Q14980|NUMA1_HUMAN Nuclear mitotic apparatus protein 1 OS=Homo sapiens OX=9606 GN=NUMA1 PE=1 SV=2	1	48.9483	6.82809e-06	107.03	88.069	48.948	1	67.385	0.00260959	67.385	1	54.5394	6.82809e-06	107.03	1	86.4628	0.000819772	86.463	1	48.9483	0.0106933	48.948	1	89.8046	0.000569886	89.805	1	49.4481	0.0100068
O60264	SWI/SNF-related matrix-associated actin-dependent regulator of chromatin subfamily A member 5	SMARCA5	814	5.6452	6.2553	7.2561	6.2866	7.9711	5.7038	6.8749	7.9215		0.65441	O60264	814	O60264	O60264	SWI/SNF-related matrix-associated actin-dependent regulator of chromatin subfamily A member 5	SMARCA5	sp|O60264|SMCA5_HUMAN SWI/SNF-related matrix-associated actin-dependent regulator of chromatin subfamily A member 5 OS=Homo sapiens OX=9606 GN=SMARCA5 PE=1 SV=1	0.986399	18.6049	1.12758e-09	95.954	84.34	81.043	0.875019	8.45172	0.00310767	48.037	0.73494	4.42907	0.0312188	31.753	0.870976	8.29337	0.000288697	67.727	0.685697	3.38783	0.000740439	59.252	0.956552	13.4274	3.69831e-05	79.332	0.971432	15.3154	1.12758e-09
Q92466	DNA damage-binding protein 2	DDB2	309	5.4755	5.2644	8.0099	7.1889			1.3393	0.70794			Q92466	309	Q92466	Q92466	DNA damage-binding protein 2	DDB2	sp|Q92466|DDB2_HUMAN DNA damage-binding protein 2 OS=Homo sapiens OX=9606 GN=DDB2 PE=1 SV=1	1	91.9373	7.44667e-14	150.94	53.127	91.937	1	135.662	3.40207e-12	135.66	1	126.194	3.71216e-11	126.19					1	91.9373	0.00122816	91.937	1	110.857	5.30909e-07	110.86	1	96.2294	2.32692e-05
O15371	Eukaryotic translation initiation factor 3 subunit D	EIF3D	240	5.2815		1.3785		0.88595						O15371	240	O15371	O15371	Eukaryotic translation initiation factor 3 subunit D	EIF3D	sp|O15371|EIF3D_HUMAN Eukaryotic translation initiation factor 3 subunit D OS=Homo sapiens OX=9606 GN=EIF3D PE=1 SV=1	1	59.3561	2.02168e-12	77.847	74.114	59.356	1	77.8466	2.02168e-12	77.847					1	59.3561	3.95197e-06	59.356
Q01831	DNA repair protein complementing XP-C cells	XPC	174	5.276	6.0519	6.5452	7.7612	5.757	6.5196	0.96354	0.99983	1.4576	1.4776	Q01831	174	Q01831	Q01831	DNA repair protein complementing XP-C cells	XPC	sp|Q01831|XPC_HUMAN DNA repair protein complementing XP-C cells OS=Homo sapiens OX=9606 GN=XPC PE=1 SV=4	1	44.7288	2.78146e-127	231.12	231.12	44.729	1	77.221	7.74027e-127	225.23	1	44.7288	4.6146e-73	177.47	1	60.6023	2.78146e-127	231.12	1	136.062	5.43262e-55	153.21	1	27.5231	5.45099e-55	153.19	1	86.1716	3.23022e-18
Q92466	DNA damage-binding protein 2	DDB2	362	5.2541	5.677							1.3674	1.5099	Q92466	362	Q92466	Q92466	DNA damage-binding protein 2	DDB2	sp|Q92466|DDB2_HUMAN DNA damage-binding protein 2 OS=Homo sapiens OX=9606 GN=DDB2 PE=1 SV=1	1	96.9619	4.0489e-22	127.75	127.75	96.962
Q9NTK5	Obg-like ATPase 1	OLA1	190	5.1141	4.83	5.7658	5.7924	5.4122	6.7271	1.1205	1.0684	1.1279	1.1251	Q9NTK5	190	Q9NTK5	Q9NTK5	Obg-like ATPase 1	OLA1	sp|Q9NTK5|OLA1_HUMAN Obg-like ATPase 1 OS=Homo sapiens OX=9606 GN=OLA1 PE=1 SV=2	1	161.179	2.19158e-12	176.33	176.33	166.34	1	118.66	0.000102946	123.63	1	158.912	4.45593e-08	163.88	1	171.36	2.19158e-12	176.33	0.999592	33.8904	0.0212973	33.89	1	140.728	9.25029e-05	145.89	1	156.533	5.43461e-08
Q9Y2S6	Translation machinery-associated protein 7	TMA7	32		5.386	7.6664	3.6322	3.4873	3.3364	0.77941	0.71568			Q9Y2S6	32	Q9Y2S6	Q9Y2S6	Translation machinery-associated protein 7	TMA7	sp|Q9Y2S6|TMA7_HUMAN Translation machinery-associated protein 7 OS=Homo sapiens OX=9606 GN=TMA7 PE=1 SV=1	0.635855	2.42333	7.17189e-08	109.6	103.9	109.6	0.635855	2.42333	7.17189e-08	109.6	0.569094	1.22474	0.00788451	53.569	0.635855	2.42333	7.17189e-08	109.6	0.620668	2.14337	4.55276e-06	96.103	0.614188	2.02329	4.52451e-05	86.313	0.614188	2.02329	4.52451e-05
Q9HD67	Unconventional myosin-X	MYO10	918	5.1086	3.3707		3.662	1.7333		2.0834	2.9494			Q9HD67	918	Q9HD67	Q9HD67	Unconventional myosin-X	MYO10	sp|Q9HD67|MYO10_HUMAN Unconventional myosin-X OS=Homo sapiens OX=9606 GN=MYO10 PE=1 SV=3	1	130.555	5.65825e-24	130.56	114.25	130.56					1	70.9421	5.52006e-05	70.942	1	96.5442	1.26652e-10	96.544					1	105.377	1.89205e-14	105.38	1	130.555	5.65825e-24
Q15424	Scaffold attachment factor B1	SAFB	83		5.1965		3.3441		2.0142		5.1982			Q15424	83	Q15424	Q15424	Scaffold attachment factor B1	SAFB	sp|Q15424|SAFB1_HUMAN Scaffold attachment factor B1 OS=Homo sapiens OX=9606 GN=SAFB PE=1 SV=4	0.5	0	0.000460101	51.819	37.947	30.587					0.5	0	0.0021514	43.116					0.5	0	0.0213933	30.587					0.5	0	0.0561073
Q15424	Scaffold attachment factor B1	SAFB	84		5.1965		3.3441		2.0142		5.1982			Q15424	84	Q15424	Q15424	Scaffold attachment factor B1	SAFB	sp|Q15424|SAFB1_HUMAN Scaffold attachment factor B1 OS=Homo sapiens OX=9606 GN=SAFB PE=1 SV=4	0.537104	0.645749	0.000460101	60.621	20.711	60.621					0.5	0	0.0021514	43.116					0.5	0	0.0213933	30.587					0.5	0	0.0561073
P35579	Myosin-9	MYH9	856	4.8948	2.487	4.6206	3.423		7.7337	1.3827	1.4314	1.1588		P35579	856	P35579	P35579	Myosin-9	MYH9	sp|P35579|MYH9_HUMAN Myosin-9 OS=Homo sapiens OX=9606 GN=MYH9 PE=1 SV=4	1	64.7574	5.88116e-07	142.64	89.953	64.757	1	119.887	5.88116e-07	119.89	1	119.887	5.88116e-07	119.89					1	64.7574	0.0571072	64.757	1	129.397	0.00355045	129.4	1	142.636	0.00321514
P62633	Cellular nucleic acid-binding protein	CNBP	103	4.8637	4.886	6.7994	4.7579							P62633	103	P62633	P62633	Cellular nucleic acid-binding protein	CNBP	sp|P62633|CNBP_HUMAN Cellular nucleic acid-binding protein OS=Homo sapiens OX=9606 GN=CNBP PE=1 SV=1	1	77.0782	1.02723e-15	115.8	113.51	77.078	1	55.2131	0.000294175	55.213	1	77.0782	3.5791e-06	87.18
REV__Q8N8E3					5.1473											REV__Q8N8E3	REV__Q8N8E3				0.541212	0.717552	0.0224383	42.001	33.272	42.001
Q9NUQ6	SPATS2-like protein	SPATS2L	11	4.7832		4.5563	3.5486	2.6075						Q9NUQ6	11	Q9NUQ6	Q9NUQ6	SPATS2-like protein	SPATS2L	sp|Q9NUQ6|SPS2L_HUMAN SPATS2-like protein OS=Homo sapiens OX=9606 GN=SPATS2L PE=1 SV=2	0.99997	45.2025	5.99383e-23	174.05	134.26	174.05	0.99997	45.2025	5.99383e-23	174.05	0.885294	8.87502	2.03002e-13	134.98	0.884613	8.84597	3.00815e-10	124.86
P62906	60S ribosomal protein L10a	RPL10A	91	4.7098							0.86883			P62906	91	P62906	P62906	60S ribosomal protein L10a	RPL10A	sp|P62906|RL10A_HUMAN 60S ribosomal protein L10a OS=Homo sapiens OX=9606 GN=RPL10A PE=1 SV=2	0.836919	7.10279	4.05594e-05	72.321	59.961	72.321																					0.836919	7.10279	4.05594e-05
P62249	40S ribosomal protein S16	RPS16	4	4.669	4.5352	4.8155	4.4879	3.3596	3.8849	1.0614	1.1148	0.91905	0.92646	P62249	4	P62249	P62249	40S ribosomal protein S16	RPS16	sp|P62249|RS16_HUMAN 40S ribosomal protein S16 OS=Homo sapiens OX=9606 GN=RPS16 PE=1 SV=2	1	163.507	4.6972e-140	262.24	262.24	163.51	1	262.241	4.6972e-140	262.24	1	128.847	4.46599e-21	128.85	1	179.65	5.49247e-38	179.65	1	163.507	1.10997e-44	190.24	1	73.3864	4.52903e-05	73.386	1	96.1028	3.27389e-07
P25398	40S ribosomal protein S12	RPS12	129	4.651	5.0044	4.7205	5.1229	4.2574		0.85209		1.2018	1.1305	P25398	129	P25398	P25398	40S ribosomal protein S12	RPS12	sp|P25398|RS12_HUMAN 40S ribosomal protein S12 OS=Homo sapiens OX=9606 GN=RPS12 PE=1 SV=3	0.995578	23.5248	1.61356e-24	167.33	148.24	149.94	0.964087	14.2887	1.61356e-24	164.57	0.967488	14.7361	1.0556e-11	167.33	0.885737	8.89401	4.36215e-05	124.23					0.927213	11.0512	3.04259e-08	148.05
Q9H467	CUE domain-containing protein 2	CUEDC2	272	4.4069	3.8512	3.6306	4.1661	2.0114		0.94795				Q9H467	272	Q9H467	Q9H467	CUE domain-containing protein 2	CUEDC2	sp|Q9H467|CUED2_HUMAN CUE domain-containing protein 2 OS=Homo sapiens OX=9606 GN=CUEDC2 PE=1 SV=1	1	78.7681	6.52481e-56	186.75	179.97	186.75	0.999996	54.2224	4.45444e-26	127.97	0.998807	29.2291	1.32523e-10	97.352	1	71.7322	1.30512e-43	165.16					0.999985	48.2611	6.84651e-35	140.89
P16989	Y-box-binding protein 3	YBX3	96	4.3503	6.1451	5.4172	5.5651	5.0129	5.9536	1.6611	1.5358	1.4973	1.23	P16989	96	P16989	P16989	Y-box-binding protein 3	YBX3	sp|P16989|YBOX3_HUMAN Y-box-binding protein 3 OS=Homo sapiens OX=9606 GN=YBX3 PE=1 SV=4	1	94.3092	3.43024e-45	204.52	204.52	94.309	1	204.524	3.43024e-45	204.52	1	189.178	9.01507e-28	189.18	1	131.819	5.07357e-12	143.03	1	94.3092	2.83063e-05	94.309	1	141.196	9.64524e-12	141.2	1	59.7997	9.95614e-14
P67809	Nuclease-sensitive element-binding protein 1;Y-box-binding protein 2	YBX1;YBX2	64;99	4.3503	6.1451	5.4172	5.5651	5.0129	5.9536	1.6611	1.5358	1.4973	1.23	P67809;Q9Y2T7	64;99	P67809	P67809	Nuclease-sensitive element-binding protein 1;Y-box-binding protein 2	YBX1;YBX2	sp|P67809|YBOX1_HUMAN Nuclease-sensitive element-binding protein 1 OS=Homo sapiens OX=9606 GN=YBX1 PE=1 SV=3;sp|Q9Y2T7|YBOX2_HUMAN Y-box-binding protein 2 OS=Homo sapiens OX=9606 GN=YBX2 PE=1 SV=2	1	94.3092	3.43024e-45	204.52	204.52	94.309	1	204.524	3.43024e-45	204.52	1	189.178	9.01507e-28	189.18	1	131.819	5.07357e-12	143.03	1	94.3092	2.83063e-05	94.309	1	141.196	9.64524e-12	141.2	1	59.7997	9.95614e-14
P07814	Bifunctional glutamate/proline--tRNA ligase;Glutamate--tRNA ligase;Proline--tRNA ligase	EPRS	1109	4.3284	1.4932	1.9672	1.0244			1.0416				P07814	1109	P07814	P07814	Bifunctional glutamate/proline--tRNA ligase;Glutamate--tRNA ligase;Proline--tRNA ligase	EPRS	sp|P07814|SYEP_HUMAN Bifunctional glutamate/proline--tRNA ligase OS=Homo sapiens OX=9606 GN=EPRS PE=1 SV=5	1	39.1633	8.33942e-06	65.854	47.603	39.163	1	63.6012	1.17492e-05	65.854	1	39.1633	0.00493465	39.163									1	37.3525	0.00662066	37.353
Q14157	Ubiquitin-associated protein 2-like	UBAP2L	55	4.2327										Q14157	55	Q14157	Q14157	Ubiquitin-associated protein 2-like	UBAP2L	sp|Q14157|UBP2L_HUMAN Ubiquitin-associated protein 2-like OS=Homo sapiens OX=9606 GN=UBAP2L PE=1 SV=2	0.999999	58.6765	0.00280074	58.676	42.539	58.676
Q9P2I0	Cleavage and polyadenylation specificity factor subunit 2	CPSF2	390	4.2273	1.1867	0.90437	0.91307	1.0315	0.73182	0.70671	0.65105			Q9P2I0	390	Q9P2I0	Q9P2I0	Cleavage and polyadenylation specificity factor subunit 2	CPSF2	sp|Q9P2I0|CPSF2_HUMAN Cleavage and polyadenylation specificity factor subunit 2 OS=Homo sapiens OX=9606 GN=CPSF2 PE=1 SV=2	1	136.666	1.16766e-28	163.78	117.62	163.78	1	86.1449	1.37202e-06	101.53	1	107.867	9.63378e-27	143.05	1	105.323	2.57834e-22	135.02	0.999888	39.4982	0.0115455	52.265	1	136.666	1.16766e-28	163.78	1	75.9939	1.59933e-10
Q8N3C0	Activating signal cointegrator 1 complex subunit 3	ASCC3	311	4.1117										Q8N3C0	311	Q8N3C0	Q8N3C0	Activating signal cointegrator 1 complex subunit 3	ASCC3	sp|Q8N3C0|ASCC3_HUMAN Activating signal cointegrator 1 complex subunit 3 OS=Homo sapiens OX=9606 GN=ASCC3 PE=1 SV=3	0.837723	7.12843	0.000262471	88.392	69.612	88.392
Q7KZF4	Staphylococcal nuclease domain-containing protein 1	SND1	513	4.107	3.9786	4.3422	4.6222	3.8924		1.1441	1.2337			Q7KZF4	513	Q7KZF4	Q7KZF4	Staphylococcal nuclease domain-containing protein 1	SND1	sp|Q7KZF4|SND1_HUMAN Staphylococcal nuclease domain-containing protein 1 OS=Homo sapiens OX=9606 GN=SND1 PE=1 SV=1	0.990974	20.4057	1.93003e-10	120.96	108.75	120.96	0.943126	12.1966	0.000201168	73.632	0.984221	17.9503	6.66301e-08	108.56	0.879473	8.63138	7.35365e-08	107.85					0.897575	9.42665	1.773e-06	100.55	0.876426	8.50789	2.85584e-06
P62913	60S ribosomal protein L11	RPL11	85	3.9319	1.3569		6.6481			5.1834				P62913	85	P62913	P62913	60S ribosomal protein L11	RPL11	sp|P62913|RL11_HUMAN 60S ribosomal protein L11 OS=Homo sapiens OX=9606 GN=RPL11 PE=1 SV=2	0.991489	20.6632	0.00989479	87.476	19.913	57.347	0.842209	7.27336	0.0591362	34.755	0.856866	7.7717	0.0108084	85.676	0.991489	20.6632	0.0102266	57.347					0.776975	5.42053	0.00989479	87.476
P62979	Ubiquitin-40S ribosomal protein S27a;Ubiquitin;40S ribosomal protein S27a	RPS27A	152;152	3.8917	4.1824	3.1029	6.8125	4.0948		0.67152	0.39945	1.4509	1.4692	A0A2R8Y422;P62979	152;152	A0A2R8Y422;P62979	P62979	Ubiquitin-40S ribosomal protein S27a;Ubiquitin;40S ribosomal protein S27a	RPS27A	tr|A0A2R8Y422|A0A2R8Y422_HUMAN Uncharacterized protein OS=Homo sapiens OX=9606 PE=4 SV=1;sp|P62979|RS27A_HUMAN Ubiquitin-40S ribosomal protein S27a OS=Homo sapiens OX=9606 GN=RPS27A PE=1 SV=2	0.988579	19.3731	1.64969e-09	109.84	108.54	98.337	0.925482	10.9411	0.0480793	31.526	0.94885	12.6835	0.000503364	62.891	0.853904	7.66772	6.34647e-05	78.744					0.954367	13.2044	1.64969e-09	109.84	0.920906	10.6607	0.00151076
P30050	60S ribosomal protein L12	RPL12	48	3.8697	4.6723	4.0623	4.3194	4.8461	4.7129	0.69449	0.80553	1.1813	1.493	P30050	48	P30050	P30050	60S ribosomal protein L12	RPL12	sp|P30050|RL12_HUMAN 60S ribosomal protein L12 OS=Homo sapiens OX=9606 GN=RPL12 PE=1 SV=1	1	130.194	9.04905e-65	213.63	191.89	213.63	0.999999	62.6335	3.97966e-18	136.51	1	130.194	9.04905e-65	213.63	1	96.124	1.85668e-34	182.08	1	81.0304	3.87373e-20	154.36	1	108.243	2.81404e-53	208.72	1	74.4184	3.81199e-29
Q86UV5	Ubiquitin carboxyl-terminal hydrolase 48	USP48	551	3.8684	3.4079	4.7979	5.124	3.6395	4.6634					Q86UV5	551	Q86UV5	Q86UV5	Ubiquitin carboxyl-terminal hydrolase 48	USP48	sp|Q86UV5|UBP48_HUMAN Ubiquitin carboxyl-terminal hydrolase 48 OS=Homo sapiens OX=9606 GN=USP48 PE=1 SV=1	0.999997	54.9814	0.00532037	107.66	39.243	107.66	0.999918	40.851	0.0069613	89.355	0.99999	49.8306	0.00607342	102.51	0.999997	54.9814	0.00532037	107.66	0.999837	37.8732	0.0078977	84.244	0.999792	36.8147	0.0232211	76.478
Q3SXM5	Inactive hydroxysteroid dehydrogenase-like protein 1	HSDL1	109	3.8606	1.2381	4.3131	1.4837	1.8436		1.8473	1.0204			Q3SXM5	109	Q3SXM5	Q3SXM5	Inactive hydroxysteroid dehydrogenase-like protein 1	HSDL1	sp|Q3SXM5|HSDL1_HUMAN Inactive hydroxysteroid dehydrogenase-like protein 1 OS=Homo sapiens OX=9606 GN=HSDL1 PE=1 SV=3	1	65.1147	9.07877e-19	145.55	125.77	105.14	0.999999	62.8049	9.07877e-19	145.55	0.999993	51.6134	2.82373e-05	93.823	0.999999	62.93	1.73599e-18	143.17					1	65.1147	3.03565e-09	121.08	0.999888	39.4962	8.89048e-06
O00267	Transcription elongation factor SPT5	SUPT5H	144	3.6832	4.3016							0.67262		O00267	144	O00267	O00267	Transcription elongation factor SPT5	SUPT5H	sp|O00267|SPT5H_HUMAN Transcription elongation factor SPT5 OS=Homo sapiens OX=9606 GN=SUPT5H PE=1 SV=1	0.547143	0.821392	0.00194376	63.682	63.682	63.682
P09874	Poly [ADP-ribose] polymerase 1	PARP1	442	4.3212	4.2507									P09874	442	P09874	P09874	Poly [ADP-ribose] polymerase 1	PARP1	sp|P09874|PARP1_HUMAN Poly [ADP-ribose] polymerase 1 OS=Homo sapiens OX=9606 GN=PARP1 PE=1 SV=4	0.55572	0.971987	0.0235439	29.299	29.299	29.299
Q7KZ85	Transcription elongation factor SPT6	SUPT6H	306	3.846	3.0702	6.09	5.1382	3.2418	3.9059	1.3416	1.2546	0.56045	0.50521	Q7KZ85	306	Q7KZ85	Q7KZ85	Transcription elongation factor SPT6	SUPT6H	sp|Q7KZ85|SPT6H_HUMAN Transcription elongation factor SPT6 OS=Homo sapiens OX=9606 GN=SUPT6H PE=1 SV=2	1	108.171	5.65968e-22	108.17	96.043	108.17	1	82.5859	2.55287e-13	82.586	1	94.8851	5.59977e-18	94.885	1	75.1224	4.91714e-12	75.122	1	108.171	5.65968e-22	108.17	1	77.5142	3.42316e-12	77.514	1	77.0233	3.72977e-12
Q9Y570	Protein phosphatase methylesterase 1	PPME1	217	3.7665		2.1337	3.0562							Q9Y570	217	Q9Y570	Q9Y570	Protein phosphatase methylesterase 1	PPME1	sp|Q9Y570|PPME1_HUMAN Protein phosphatase methylesterase 1 OS=Homo sapiens OX=9606 GN=PPME1 PE=1 SV=3	1	34.4978	0.000836622	62.377	38.336	34.498	1	28.5803	0.0445377	28.58	1	34.4978	0.0249422	34.498
P24928	DNA-directed RNA polymerase II subunit RPB1	POLR2A	177	3.7493	3.6942	3.8815	4.2009	4.01	3.9677	0.89872	0.83361			P24928	177	P24928	P24928	DNA-directed RNA polymerase II subunit RPB1	POLR2A	sp|P24928|RPB1_HUMAN DNA-directed RNA polymerase II subunit RPB1 OS=Homo sapiens OX=9606 GN=POLR2A PE=1 SV=2	0.971416	15.3127	4.05554e-174	274.6	252.07	274.6	0.938263	11.8178	3.13714e-11	105	0.971416	15.3127	4.05554e-174	274.6	0.765846	5.14639	6.32183e-100	227	0.914983	10.3191	1.03927e-115	237.06	0.5	0	8.9171e-07	87.363	0.817783	6.52049	1.09001e-17
Q93009	Ubiquitin carboxyl-terminal hydrolase 7	USP7	357	0.92107	3.9853	0.82977	7.8063	2.1878		1.4463	9.2958		1.1581	Q93009	357	Q93009	Q93009	Ubiquitin carboxyl-terminal hydrolase 7	USP7	sp|Q93009|UBP7_HUMAN Ubiquitin carboxyl-terminal hydrolase 7 OS=Homo sapiens OX=9606 GN=USP7 PE=1 SV=2	0.613768	2.01155	3.94809e-05	77.776	71.195	77.776	0.613768	2.01155	3.94809e-05	77.776	0.543958	0.765606	0.00395984	63.894	0.574532	1.30447	0.00395984	63.894	0.550851	0.886433	0.00674572	57.414	0.586807	1.52343	0.00110741	64.675	0.574532	1.30447	0.0144091
P78344	Eukaryotic translation initiation factor 4 gamma 2	EIF4G2	520	3.7462		0.88481	0.89313	0.99603						P78344	520	P78344	P78344	Eukaryotic translation initiation factor 4 gamma 2	EIF4G2	sp|P78344|IF4G2_HUMAN Eukaryotic translation initiation factor 4 gamma 2 OS=Homo sapiens OX=9606 GN=EIF4G2 PE=1 SV=1	0.999301	33.8956	3.92634e-06	51.22	51.22	45.957	0.985286	21.2394	0.00178376	26.9	0.949967	14.4782	0.00164335	27.09	0.999301	33.8956	2.77521e-05	45.957
P23396	40S ribosomal protein S3	RPS3	230	3.713	3.9258	3.7666	3.992	3.3639	3.458	0.93944	0.96238	0.69228	0.68057	P23396	230	P23396	P23396	40S ribosomal protein S3	RPS3	sp|P23396|RS3_HUMAN 40S ribosomal protein S3 OS=Homo sapiens OX=9606 GN=RPS3 PE=1 SV=2	1	72.9579	1.90651e-44	169.04	169.04	72.958	1	56.2251	8.41975e-33	141.58	1	87.0009	1.1175e-37	150.69	1	65.3952	1.29313e-37	150.69	1	72.9579	4.60407e-38	155.86	1	78.692	1.9806e-42	169.04	1	55.4522	1.32658e-37
P61221	ATP-binding cassette sub-family E member 1	ABCE1	397	3.6965	3.1032	3.192	3.4582	2.7358	2.7061	1.2364	1.1364		1.415	P61221	397	P61221	P61221	ATP-binding cassette sub-family E member 1	ABCE1	sp|P61221|ABCE1_HUMAN ATP-binding cassette sub-family E member 1 OS=Homo sapiens OX=9606 GN=ABCE1 PE=1 SV=1	1	119.265	2.67353e-30	135.98	125.92	135.98	1	105.521	1.34946e-17	113.23	1	86.1263	1.58609e-12	93.269	0.999991	52.3484	3.25978e-06	59.469	1	119.265	2.67353e-30	135.98	1	67.3836	2.47231e-10	82.36	0.999999	60.8694	1.27103e-07
P62875	DNA-directed RNA polymerases I, II, and III subunit RPABC5	POLR2L	12	3.6842	1.6988	0.92276	2.4124	1.6007		1.1932				P62875	12	P62875	P62875	DNA-directed RNA polymerases I, II, and III subunit RPABC5	POLR2L	sp|P62875|RPAB5_HUMAN DNA-directed RNA polymerases I, II, and III subunit RPABC5 OS=Homo sapiens OX=9606 GN=POLR2L PE=1 SV=1	0.999975	45.9534	0.000515094	76.302	61.1	76.302	0.99391	22.1272	0.0170493	72.485	0.997052	25.2917	0.00746088	51.998	0.999975	45.9534	0.00134414	76.302					0.9997	35.2293	0.000515094	73.632
P37268	Squalene synthase	FDFT1	358	3.6607		2.4941	0.96785	2.1614		1.3504	1.0088			P37268	358	P37268	P37268	Squalene synthase	FDFT1	sp|P37268|FDFT_HUMAN Squalene synthase OS=Homo sapiens OX=9606 GN=FDFT1 PE=1 SV=1	1	62.8229	1.90051e-10	123.64	104.4	62.823	1	59.2273	0.00367229	59.227	1	34.1785	0.0417733	34.179	1	123.639	4.28127e-10	123.64					1	54.6078	1.90051e-10	121.04	1	62.8229	3.08088e-05
P14625	Endoplasmin	HSP90B1	168	3.6494			1.4841					1.0207	1.2172	P14625	168	P14625	P14625	Endoplasmin	HSP90B1	sp|P14625|ENPL_HUMAN Endoplasmin OS=Homo sapiens OX=9606 GN=HSP90B1 PE=1 SV=1	0.999479	32.8271	2.66558e-08	125.82	78.557	83.633					0.977431	16.3658	2.66558e-08	95.018
P46783	40S ribosomal protein S10;Putative 40S ribosomal protein S10-like	RPS10;RPS10P5	139;150	3.6138	3.5705	4.3933	4.4649	4.1416	3.8807	0.84646	0.73185	0.94771	1.042	P46783;Q9NQ39	139;150	P46783	P46783	40S ribosomal protein S10;Putative 40S ribosomal protein S10-like	RPS10;RPS10P5	sp|P46783|RS10_HUMAN 40S ribosomal protein S10 OS=Homo sapiens OX=9606 GN=RPS10 PE=1 SV=1;sp|Q9NQ39|RS10L_HUMAN Putative 40S ribosomal protein S10-like OS=Homo sapiens OX=9606 GN=RPS10P5 PE=5 SV=1	1	86.5572	0	360.04	360.04	86.557	1	63.7264	3.76785e-161	268.93	1	57.1466	8.12126e-292	322.23	1	74.579	2.18681e-208	294.31	1	86.5572	2.96617e-161	270.79	1	24.1534	0	360.04	1	24.8957	3.01287e-93
P62906	60S ribosomal protein L10a	RPL10A	92	4.6677	3.8537	4.9575	4.4988	5.6214	4.89	0.89667	0.87803		0.49938	P62906	92	P62906	P62906	60S ribosomal protein L10a	RPL10A	sp|P62906|RL10A_HUMAN 60S ribosomal protein L10a OS=Homo sapiens OX=9606 GN=RPL10A PE=1 SV=2	0.585428	1.49873	8.54266e-27	141.32	141.32	139.3	0.566767	1.16683	1.3148e-26	137.68	0.571575	1.25198	3.51892e-06	90.759	0.567699	1.18332	1.97882e-15	116.84	0.563144	1.10281	8.63691e-22	126.63	0.564532	1.12732	1.27978e-06	92.939	0.546564	0.811253	0.000173368
Q9UNA4	DNA polymerase iota	POLI	575	3.4862	0.8861		0.90369	0.73701		1.0473	0.53975		1.1937	Q9UNA4	575	Q9UNA4	Q9UNA4	DNA polymerase iota	POLI	sp|Q9UNA4|POLI_HUMAN DNA polymerase iota OS=Homo sapiens OX=9606 GN=POLI PE=1 SV=3	1	38.0998	0.0013364	64.439	52.056	38.1					1	27.9138	0.0192624	27.914	1	45.0775	0.00409719	45.077					1	64.4386	0.0013364	64.439	1	38.0998	0.00719932
P39019	40S ribosomal protein S19	RPS19	111	3.4543		3.9758	3.7275	3.7027		1.2357	1.0106			P39019	111	P39019	P39019	40S ribosomal protein S19	RPS19	sp|P39019|RS19_HUMAN 40S ribosomal protein S19 OS=Homo sapiens OX=9606 GN=RPS19 PE=1 SV=2	0.999971	45.3144	8.27535e-43	192.68	148.36	192.68	0.999971	45.3144	8.27535e-43	192.68	0.959351	13.7293	9.61436e-11	115.12	0.999944	42.5097	5.66088e-23	160.18					0.996901	25.0737	1.0639e-12	115.8	0.760328	5.01384	0.00328193
Q01831	DNA repair protein complementing XP-C cells	XPC	161	3.4522	3.9443	4.3392	3.8757	3.7354	3.6153	1.0368	0.98164	1.3818	1.4304	Q01831	161	Q01831	Q01831	DNA repair protein complementing XP-C cells	XPC	sp|Q01831|XPC_HUMAN DNA repair protein complementing XP-C cells OS=Homo sapiens OX=9606 GN=XPC PE=1 SV=4	1	44.7288	1.40319e-48	148.2	148.2	44.729	1	77.221	3.94026e-21	115.78	1	44.7288	1.6765e-16	105.77	1	60.6023	1.40319e-48	148.2	1	109.987	6.02905e-30	135.81	1	27.5231	2.11149e-22	123.19	0.999999	59.3691	2.86664e-09
P62633	Cellular nucleic acid-binding protein	CNBP	8	3.4249	3.3342	4.438	3.6342	3.4312	2.5503	0.82034	1.0962	1.1574	1.0752	P62633	8	P62633	P62633	Cellular nucleic acid-binding protein	CNBP	sp|P62633|CNBP_HUMAN Cellular nucleic acid-binding protein OS=Homo sapiens OX=9606 GN=CNBP PE=1 SV=1	1	92.4393	9.97097e-23	182.76	177.28	92.439	1	174.407	1.08123e-16	174.41	1	152.466	1.81675e-09	152.47	1	148.523	2.96077e-09	148.52	1	92.4393	0.000264284	92.439	1	141.196	3.60011e-08	141.2	1	149.937	2.55054e-09
Q9UJW0	Dynactin subunit 4	DCTN4	181	3.4144	1.3493	1.2324	0.99065	1.1133		1.2116	1.2494	1.1032	1.0704	Q9UJW0	181	Q9UJW0	Q9UJW0	Dynactin subunit 4	DCTN4	sp|Q9UJW0|DCTN4_HUMAN Dynactin subunit 4 OS=Homo sapiens OX=9606 GN=DCTN4 PE=1 SV=1	1	51.6953	1.72172e-33	140.84	125.69	51.695	1	58.0902	8.55935e-18	122.45	1	71.08	5.55519e-22	130.06	1	140.841	1.72172e-33	140.84					1	34.0938	1.11091e-17	115.8	1	51.6953	2.13138e-06
Q9ULX3	RNA-binding protein NOB1	NOB1	333	3.4005	0.8104	1.7223	1.9606	1.0987	0.8029	0.8866	0.67697	0.71896	0.7668	Q9ULX3	333	Q9ULX3	Q9ULX3	RNA-binding protein NOB1	NOB1	sp|Q9ULX3|NOB1_HUMAN RNA-binding protein NOB1 OS=Homo sapiens OX=9606 GN=NOB1 PE=1 SV=1	1	31.0889	1.39904e-07	96.303	96.303	31.089	1	46.3186	4.71172e-07	95.654	1	31.0889	0.00848502	67.993	1	31.8756	1.77596e-05	75.383	0.532309	0.562054	0.0405709	24.853	1	60.4741	1.39904e-07	96.303	0.57891	1.38237	0.00269446
Q6P6C2	RNA demethylase ALKBH5	ALKBH5	116	3.3722	1.2132	2.4565	1.1858	1.0387		0.9917	1.0206			Q6P6C2	116	Q6P6C2	Q6P6C2	RNA demethylase ALKBH5	ALKBH5	sp|Q6P6C2|ALKB5_HUMAN RNA demethylase ALKBH5 OS=Homo sapiens OX=9606 GN=ALKBH5 PE=1 SV=2	1	36.9444	0.000179673	84.468	56.607	36.944	1	77.7756	0.000459638	77.776	1	40.8298	0.0167407	40.83	1	84.4684	0.000179673	84.468	1	36.9444	0.0443625	36.944	1	40.2776	0.01735	40.278	1	72.8912	0.00068672
O14929	Histone acetyltransferase type B catalytic subunit	HAT1	15	3.3718	1.3474			1.8049	1.8309			1.1522	1.3487	O14929	15	O14929	O14929	Histone acetyltransferase type B catalytic subunit	HAT1	sp|O14929|HAT1_HUMAN Histone acetyltransferase type B catalytic subunit OS=Homo sapiens OX=9606 GN=HAT1 PE=1 SV=1	0.999977	46.4345	7.62171e-05	111.27	111.27	107.79									0.675913	3.1923	0.0186547	49.35	0.999132	30.6095	0.00120242	67.456
Q01085	Nucleolysin TIA-1 isoform p40;Nucleolysin TIAR	TIA1;TIAL1	77;79	3.3515	4.4102	4.5205			2.1895					P31483;Q01085	77;79	P31483;Q01085	Q01085	Nucleolysin TIA-1 isoform p40;Nucleolysin TIAR	TIA1;TIAL1	sp|P31483|TIA1_HUMAN Nucleolysin TIA-1 isoform p40 OS=Homo sapiens OX=9606 GN=TIA1 PE=1 SV=3;sp|Q01085|TIAR_HUMAN Nucleolysin TIAR OS=Homo sapiens OX=9606 GN=TIAL1 PE=1 SV=1	1	72.6363	8.68556e-06	87.427	78.538	87.427	0.999999	62.8313	0.000122054	67.135									0.982332	17.4506	0.0544309	17.958
Q2YD98	UV-stimulated scaffold protein A	UVSSA	414	3.3348	5.8449	1.0801		3.1121	5.8061	0.27231	0.50771			Q2YD98	414	Q2YD98	Q2YD98	UV-stimulated scaffold protein A	UVSSA	sp|Q2YD98|UVSSA_HUMAN UV-stimulated scaffold protein A OS=Homo sapiens OX=9606 GN=UVSSA PE=1 SV=2	1	65.1198	2.54166e-65	118.58	118.58	88.907	0.978638	16.6098	0.0214309	17.953					0.99959	33.8677	5.61616e-54	106.44	0.999479	32.8255	2.54166e-65	118.58	0.99925	31.2462	3.63828e-44	96.239	1	65.1198	4.5665e-36
P11387	DNA topoisomerase 1	TOP1	642	3.3233	2.8362	3.5108	3.4014	4.7876		1.4745		0.89112	0.79821	P11387	642	P11387	P11387	DNA topoisomerase 1	TOP1	sp|P11387|TOP1_HUMAN DNA topoisomerase 1 OS=Homo sapiens OX=9606 GN=TOP1 PE=1 SV=2	1	107.55	2.81138e-17	163.12	148.66	163.12	1	107.55	2.81138e-17	163.12	0.998367	29.9981	0.00268711	52.576	1	103.065	2.78488e-15	158.05					0.999993	51.7306	0.000136184	77.644
O95478	Ribosome biogenesis protein NSA2 homolog	NSA2	134	3.3212		3.0064						0.5388		O95478	134	O95478	O95478	Ribosome biogenesis protein NSA2 homolog	NSA2	sp|O95478|NSA2_HUMAN Ribosome biogenesis protein NSA2 homolog OS=Homo sapiens OX=9606 GN=NSA2 PE=1 SV=1	1	90.6136	0.000207341	90.614	67.893	90.614	1	90.6136	0.000207341	90.614
O75534	Cold shock domain-containing protein E1	CSDE1	307	3.3058	2.5122		2.7307	3.5998			0.54357			O75534	307	O75534	O75534	Cold shock domain-containing protein E1	CSDE1	sp|O75534|CSDE1_HUMAN Cold shock domain-containing protein E1 OS=Homo sapiens OX=9606 GN=CSDE1 PE=1 SV=2	1	79.6386	3.27324e-08	112.08	83.013	79.639					1	85.4573	3.93071e-05	85.457	1	89.5068	2.24474e-05	89.507									1	79.6386	0.000103881
Q8TDZ2	Protein-methionine sulfoxide oxidase MICAL1	MICAL1	488	3.3049	1.2293	1.4898	1.6504	1.4014		1.9381	1.3392	0.34464	0.41247	Q8TDZ2	488	Q8TDZ2	Q8TDZ2	Protein-methionine sulfoxide oxidase MICAL1	MICAL1	sp|Q8TDZ2|MICA1_HUMAN [F-actin]-monooxygenase MICAL1 OS=Homo sapiens OX=9606 GN=MICAL1 PE=1 SV=2	1	62.3026	1.22547e-08	107.83	89.519	62.303	1	69.7136	1.22547e-08	107.83	1	82.9999	8.1634e-05	83	1	70.9771	0.000191854	70.977					1	65.0922	0.000412187	65.092	1	62.3026	0.00151076
Q92522	Histone H1x	H1FX	106	3.3011	2.7259	2.9977	2.8748	2.1681		0.74529	0.64208	1.3116	1.3751	Q92522	106	Q92522	Q92522	Histone H1x	H1FX	sp|Q92522|H1X_HUMAN Histone H1x OS=Homo sapiens OX=9606 GN=H1FX PE=1 SV=1	0.999736	35.7796	1.69125e-44	144.92	144.92	127.5	0.99742	25.872	7.83764e-19	103.26	0.998172	27.3718	1.69125e-44	144.92	0.999736	35.7796	7.38658e-35	127.5					0.997439	25.9046	6.74232e-16	89.483	0.98687	18.76	2.62357e-12
Q00341	Vigilin	HDLBP	714		3.3978	3.2897	4.7778	4.6278						Q00341	714	Q00341	Q00341	Vigilin	HDLBP	sp|Q00341|VIGLN_HUMAN Vigilin OS=Homo sapiens OX=9606 GN=HDLBP PE=1 SV=2	0.995729	23.6762	0.0183002	29.936	16.98	23.676	0.981895	17.3426	0.0465618	21.23	0.991426	20.631	0.0358184	24.276	0.995729	23.6762	0.0379333	23.676
P49790	Nuclear pore complex protein Nup153	NUP153	27	3.2725	1.9293	1.1062	2.5641	0.96368	1.1274	2.2599	1.11		0.31701	P49790	27	P49790	P49790	Nuclear pore complex protein Nup153	NUP153	sp|P49790|NU153_HUMAN Nuclear pore complex protein Nup153 OS=Homo sapiens OX=9606 GN=NUP153 PE=1 SV=2	1	36.8469	0.001308	63.091	18.635	36.847	1	23.0918	0.0332522	23.092	1	50.3537	0.00187416	50.354	1	47.9914	0.00188714	47.991	1	36.8469	0.00620291	36.954	1	30.8277	0.00157121	49.28	1	48.1146	0.00185692
Q9P1Y6	PHD and RING finger domain-containing protein 1	PHRF1	556	3.2479	2.9672	3.0657	2.497	3.4244	3.372	0.75439	0.80706			Q9P1Y6	556	Q9P1Y6	Q9P1Y6	PHD and RING finger domain-containing protein 1	PHRF1	sp|Q9P1Y6|PHRF1_HUMAN PHD and RING finger domain-containing protein 1 OS=Homo sapiens OX=9606 GN=PHRF1 PE=1 SV=3	1	60.4896	2.32882e-07	111.06	99.191	60.49	1	111.057	2.32882e-07	111.06	1	84.1691	4.46706e-05	84.169	1	64.5504	0.000808014	64.55	1	60.4896	0.00113068	60.49	1	77.5932	0.000137008	77.593	1	68.0687	0.000538883
Q14204	Cytoplasmic dynein 1 heavy chain 1	DYNC1H1	4406	3.2318	1.4334	1.4619	1.7498	1.9778		2.0899	2.3406			Q14204	4406	Q14204	Q14204	Cytoplasmic dynein 1 heavy chain 1	DYNC1H1	sp|Q14204|DYHC1_HUMAN Cytoplasmic dynein 1 heavy chain 1 OS=Homo sapiens OX=9606 GN=DYNC1H1 PE=1 SV=5	1	53.2519	0.00128789	77.64	39.006	53.252	1	67.1532	0.00265836	67.153	1	36.2843	0.0363157	36.284	1	56.2251	0.00587972	56.225					1	77.6404	0.00128789	77.64	1	53.2519	0.00699194
O75534	Cold shock domain-containing protein E1	CSDE1	682	3.1981	4.4069	4.0917	3.6921	4.1868	4.1924	0.99443	0.88402			O75534	682	O75534	O75534	Cold shock domain-containing protein E1	CSDE1	sp|O75534|CSDE1_HUMAN Cold shock domain-containing protein E1 OS=Homo sapiens OX=9606 GN=CSDE1 PE=1 SV=2	1	112.686	2.62858e-74	180.13	180.13	180.13	1	81.0442	1.52095e-27	118.16	1	112.686	2.62858e-74	180.13	1	95.5421	6.55542e-28	122.77	1	63.05	5.4155e-18	95.206	1	81.5716	3.9094e-19	103.95	0.999893	39.7158	5.49518e-05
Q8N3C0	Activating signal cointegrator 1 complex subunit 3	ASCC3	198	3.1841	3.8535	3.1979	2.9941	2.051	1.593	1.0269	0.82064			Q8N3C0	198	Q8N3C0	Q8N3C0	Activating signal cointegrator 1 complex subunit 3	ASCC3	sp|Q8N3C0|ASCC3_HUMAN Activating signal cointegrator 1 complex subunit 3 OS=Homo sapiens OX=9606 GN=ASCC3 PE=1 SV=3	1	144.721	2.77285e-49	152.81	141.76	152.81	0.6364	2.43106	0.00300883	114.6	0.987806	19.3556	9.81513e-05	53.166	1	117.075	5.32048e-30	134.9	0.621389	2.15171	0.00503269	100.45	1	144.721	2.77285e-49	152.81	0.599889	1.7589	0.0123567
O75534	Cold shock domain-containing protein E1	CSDE1	288	3.1715	2.8969	3.0879	2.8432	3.295	3.6119	1.0432	1.1142	0.95255	0.9725	O75534	288	O75534	O75534	Cold shock domain-containing protein E1	CSDE1	sp|O75534|CSDE1_HUMAN Cold shock domain-containing protein E1 OS=Homo sapiens OX=9606 GN=CSDE1 PE=1 SV=2	1	88.1203	0.00157669	91.867	41.26	91.867	1	87.6788	0.00333002	91.087	1	64.9106	0.00292425	68.657	1	88.1203	0.00321535	91.867	0.999719	35.5111	0.0185968	35.511	0.999998	56.7721	0.00954784	60.518	0.998411	27.9819	0.033786
Q9Y4X5	E3 ubiquitin-protein ligase ARIH1	ARIH1	293	3.1582				4.8323	3.1618	3.7519	1.6885			Q9Y4X5	293	Q9Y4X5	Q9Y4X5	E3 ubiquitin-protein ligase ARIH1	ARIH1	sp|Q9Y4X5|ARI1_HUMAN E3 ubiquitin-protein ligase ARIH1 OS=Homo sapiens OX=9606 GN=ARIH1 PE=1 SV=2	1	50.4517	0.00280074	58.676	44.558	50.452									1	47.3018	0.00521887	47.302	1	50.4517	0.00387167	50.452	1	58.6765	0.00280074	58.676	1	42.3381	0.0218295
P50851	Lipopolysaccharide-responsive and beige-like anchor protein	LRBA	1243	3.085	1.0041	0.73875	0.85299	0.88186		1.3882				P50851	1243	P50851	P50851	Lipopolysaccharide-responsive and beige-like anchor protein	LRBA	sp|P50851|LRBA_HUMAN Lipopolysaccharide-responsive and beige-like anchor protein OS=Homo sapiens OX=9606 GN=LRBA PE=1 SV=4	1	56.7933	4.38399e-06	86.578	86.578	56.793	1	40.8568	0.00192855	40.857	1	86.5781	4.38399e-06	86.578	1	63.4622	0.00014108	63.462					1	60.9184	0.000122812	60.918	1	56.7933	0.00277323
P13489	Ribonuclease inhibitor	RNH1	46	3.066	4.5899	1.2904		0.82962			0.78181	1.0932	0.90712	P13489	46	P13489	P13489	Ribonuclease inhibitor	RNH1	sp|P13489|RINI_HUMAN Ribonuclease inhibitor OS=Homo sapiens OX=9606 GN=RNH1 PE=1 SV=2	1	30.3922	0.0138015	68.016	41.632	30.392	1	37.5559	0.0358611	37.556	1	39.6247	0.042719	39.625	1	33.0883	0.0226339	33.088									1	30.3922	0.0271263
P16989	Y-box-binding protein 3	YBX3	90	3.793	3.1988	3.2635	3.5832	3.1289	3.314	1.1049	1.144	1.4518	1.5587	P16989	90	P16989	P16989	Y-box-binding protein 3	YBX3	sp|P16989|YBOX3_HUMAN Y-box-binding protein 3 OS=Homo sapiens OX=9606 GN=YBX3 PE=1 SV=4	1	131.868	3.01147e-45	205.53	0	205.53	1	125.261	1.7381e-35	196.48	1	70.6393	1.88595e-13	155.11	1	131.868	3.01147e-45	205.53	1	67.2873	6.61301e-09	123.63	1	80.2753	8.7194e-12	141.88	0.999997	54.9427	1.96455e-08
Q9Y3D8	Adenylate kinase isoenzyme 6	AK6	168	3.0493						2.7433	1.9709			Q9Y3D8	168	Q9Y3D8	Q9Y3D8	Adenylate kinase isoenzyme 6	AK6	sp|Q9Y3D8|KAD6_HUMAN Adenylate kinase isoenzyme 6 OS=Homo sapiens OX=9606 GN=AK6 PE=1 SV=1	1	45.7644	0.0139046	56.729	40.097	45.764									1	38.2705	0.0438423	38.27					1	27.4093	0.0699203	27.409	1	45.7644	0.0150671
O43709	Probable 18S rRNA (guanine-N(7))-methyltransferase	WBSCR22	255	3.0472	0.86646	0.83708	0.96606	0.88477	0.90398	0.72289	0.66473			O43709	255	O43709	O43709	Probable 18S rRNA (guanine-N(7))-methyltransferase	WBSCR22	sp|O43709|BUD23_HUMAN Probable 18S rRNA (guanine-N(7))-methyltransferase OS=Homo sapiens OX=9606 GN=BUD23 PE=1 SV=2	1	52.7897	0.00206488	105.4	79.923	52.79	1	64.2973	0.0107287	78.556	1	72.6431	0.00622039	89.247	1	72.6431	0.0136203	74.162	1	52.7897	0.00622039	89.247	1	76.4649	0.012105	76.465	1	52.7897	0.0158002
P43686	26S protease regulatory subunit 6B	PSMC4	217	2.9849		2.2711								P43686	217	P43686	P43686	26S protease regulatory subunit 6B	PSMC4	sp|P43686|PRS6B_HUMAN 26S proteasome regulatory subunit 6B OS=Homo sapiens OX=9606 GN=PSMC4 PE=1 SV=2	1	42.6332	0.00609241	42.633	27.212	42.633	1	42.6332	0.00609241	42.633
P32780	General transcription factor IIH subunit 1	GTF2H1	240	2.9806	2.8244	2.0111	2.6261	2.2676	1.589	1.3038				P32780	240	P32780	P32780	General transcription factor IIH subunit 1	GTF2H1	sp|P32780|TF2H1_HUMAN General transcription factor IIH subunit 1 OS=Homo sapiens OX=9606 GN=GTF2H1 PE=1 SV=1	1	85.9807	1.34124e-16	125.73	112.31	125.73	0.999961	44.0427	9.54947e-05	68.972	1	85.9807	1.34124e-16	125.73	0.999905	40.2413	0.0015819	47.532	0.999991	50.2718	0.000115644	67.579	0.991583	20.7118	0.0273523	24.954
O76094	Signal recognition particle subunit SRP72	SRP72	617	2.9745	2.2205	1.8453	2.0698			0.74033				O76094	617	O76094	O76094	Signal recognition particle subunit SRP72	SRP72	sp|O76094|SRP72_HUMAN Signal recognition particle subunit SRP72 OS=Homo sapiens OX=9606 GN=SRP72 PE=1 SV=3	1	94.5417	9.27616e-37	122.5	122.5	94.542	1	23.2231	0.00515805	23.223	1	94.5417	2.28658e-26	94.542									1	39.4663	0.00193626	39.466
Q9UHE8	Metalloreductase STEAP1	STEAP1	39	2.9557		3.0615		1.2165				0.52589	0.50825	Q9UHE8	39	Q9UHE8	Q9UHE8	Metalloreductase STEAP1	STEAP1	sp|Q9UHE8|STEA1_HUMAN Metalloreductase STEAP1 OS=Homo sapiens OX=9606 GN=STEAP1 PE=2 SV=1	1	56.5631	4.38316e-05	141.2	71.598	56.563	1	85.6757	0.00647206	85.676					1	56.5631	0.0288003	56.563
Q9P1Y6	PHD and RING finger domain-containing protein 1	PHRF1	768	2.9538	3.2221	3.3271	3.3919	6.9072		1.0331				Q9P1Y6	768	Q9P1Y6	Q9P1Y6	PHD and RING finger domain-containing protein 1	PHRF1	sp|Q9P1Y6|PHRF1_HUMAN PHD and RING finger domain-containing protein 1 OS=Homo sapiens OX=9606 GN=PHRF1 PE=1 SV=3	1	98.3681	2.08656e-10	120.53	110.3	98.368	1	60.3636	0.00114207	60.364	1	98.3681	2.66866e-06	98.368	1	70.6216	0.000343597	70.622					1	23.8182	0.0373934	23.818
Q96K19	E3 ubiquitin-protein ligase RNF170	RNF170	3	2.9534	2.8328	1.5467	1.7442	2.4918	1.3168	1.7748	1.4341	0.86749	0.87543	Q96K19	3	Q96K19	Q96K19	E3 ubiquitin-protein ligase RNF170	RNF170	sp|Q96K19|RN170_HUMAN E3 ubiquitin-protein ligase RNF170 OS=Homo sapiens OX=9606 GN=RNF170 PE=1 SV=2	1	152.342	3.1064e-20	166.55	114.27	166.55	1	107.772	2.53244e-09	116.3	1	115.162	4.15274e-12	126.31	1	126.717	3.65748e-12	128.36	1	111.607	2.47386e-07	111.61	1	110.34	1.12903e-09	121.83	1	132.4	6.09847e-13
Q12888	Tumor suppressor p53-binding protein 1	TP53BP1	605	2.9327	1.7181	2.0574	1.9564		3.0751		1.8186			Q12888	605	Q12888	Q12888	Tumor suppressor p53-binding protein 1	TP53BP1	sp|Q12888|TP53B_HUMAN TP53-binding protein 1 OS=Homo sapiens OX=9606 GN=TP53BP1 PE=1 SV=2	1	26.2063	0.000750395	69.349	52.775	26.206	1	69.3488	0.00234898	69.349	1	59.0379	0.000750395	59.038					1	26.2063	0.0251675	26.206					1	64.2973	0.0024321
P09874	Poly [ADP-ribose] polymerase 1	PARP1	447	2.932		2.4526	3.3488	3.7477		1.0992				P09874	447	P09874	P09874	Poly [ADP-ribose] polymerase 1	PARP1	sp|P09874|PARP1_HUMAN Poly [ADP-ribose] polymerase 1 OS=Homo sapiens OX=9606 GN=PARP1 PE=1 SV=4	1	47.559	0.00394355	50.284	33.652	47.559	1	50.2837	0.00394355	50.284	1	47.559	0.00510887	47.559	0.729257	4.30323	0.0426696	25.342					1	28.1771	0.0264942	28.177
O96005	Cleft lip and palate transmembrane protein 1	CLPTM1	460	2.9257	3.4644	1.6068	1.238	0.87341	0.9162	1.2127	8.6546	0.72981	0.66649	O96005	460	O96005	O96005	Cleft lip and palate transmembrane protein 1	CLPTM1	sp|O96005|CLPT1_HUMAN Cleft lip and palate transmembrane protein 1 OS=Homo sapiens OX=9606 GN=CLPTM1 PE=1 SV=1	1	140.549	2.98735e-12	146.11	98.363	146.11	1	94.2715	6.70021e-06	104.79	1	115.803	1.22651e-08	121.36	1	119.016	5.78604e-09	123.96	1	111.375	1.09222e-08	121.9	1	140.549	2.98735e-12	146.11	1	67.2517	0.00263763
Q9NY12	H/ACA ribonucleoprotein complex subunit 1	GAR1	150	2.9235	2.6582	3.5945	2.7574	3.3034	3.1482	0.77087	0.81051			Q9NY12	150	Q9NY12	Q9NY12	H/ACA ribonucleoprotein complex subunit 1	GAR1	sp|Q9NY12|GAR1_HUMAN H/ACA ribonucleoprotein complex subunit 1 OS=Homo sapiens OX=9606 GN=GAR1 PE=1 SV=1	1	99.4999	6.36978e-07	99.5	99.5	99.5	1	86.9106	1.81318e-05	86.911	1	81.709	3.84816e-05	81.709	1	77.5969	7.31325e-05	77.597	1	99.4999	6.36978e-07	99.5	1	75.4785	9.09833e-05	75.479	1	43.3824	0.00340087
O14776	Transcription elongation regulator 1	TCERG1	649	2.8998			1.587			1.8107				O14776	649	O14776	O14776	Transcription elongation regulator 1	TCERG1	sp|O14776|TCRG1_HUMAN Transcription elongation regulator 1 OS=Homo sapiens OX=9606 GN=TCERG1 PE=1 SV=2	1	51.013	0.00198694	51.013	33.987	51.013					0.549427	0.861448	0.0501965	17.8									1	51.013	0.00198694	51.013
P51948	CDK-activating kinase assembly factor MAT1	MNAT1	176	2.8984	2.5028	2.7155	2.4629	3.272						P51948	176	P51948	P51948	CDK-activating kinase assembly factor MAT1	MNAT1	sp|P51948|MAT1_HUMAN CDK-activating kinase assembly factor MAT1 OS=Homo sapiens OX=9606 GN=MNAT1 PE=1 SV=1	1	60.9729	2.5047e-19	139.88	112.35	60.973	1	68.8469	2.5047e-19	139.88	1	60.9729	0.0085663	60.973	1	34.6924	0.0344846	34.692					1	39.6247	0.0362177	39.625
Q7KZF4	Staphylococcal nuclease domain-containing protein 1	SND1	102	2.8945	1.3504									Q7KZF4	102	Q7KZF4	Q7KZF4	Staphylococcal nuclease domain-containing protein 1	SND1	sp|Q7KZF4|SND1_HUMAN Staphylococcal nuclease domain-containing protein 1 OS=Homo sapiens OX=9606 GN=SND1 PE=1 SV=1	1	65.7043	4.91594e-06	90.334	90.334	65.704
O60506	Heterogeneous nuclear ribonucleoprotein Q	SYNCRIP	297	2.8808	3.2082	3.3463	3.2586	4.3051		1.5145		1.3572		O60506	297	O60506	O60506	Heterogeneous nuclear ribonucleoprotein Q	SYNCRIP	sp|O60506|HNRPQ_HUMAN Heterogeneous nuclear ribonucleoprotein Q OS=Homo sapiens OX=9606 GN=SYNCRIP PE=1 SV=2	1	124.923	3.43708e-42	160.48	160.48	124.92	1	136.476	3.72218e-26	136.48	1	124.923	7.2216e-19	124.92	1	160.48	3.43708e-42	160.48					1	107.976	6.25767e-13	107.98
Q8IXW5	Putative RNA polymerase II subunit B1 CTD phosphatase RPAP2	RPAP2	310	2.8759	2.0594	1.0304	1.7581	3.1197		1.2094	1.1055			Q8IXW5	310	Q8IXW5	Q8IXW5	Putative RNA polymerase II subunit B1 CTD phosphatase RPAP2	RPAP2	sp|Q8IXW5|RPAP2_HUMAN Putative RNA polymerase II subunit B1 CTD phosphatase RPAP2 OS=Homo sapiens OX=9606 GN=RPAP2 PE=1 SV=1	1	51.009	0.000811259	58.268	45.068	51.009	1	47.0374	0.00239084	47.037	1	41.9666	0.00379212	41.967	1	34.8202	0.00897856	34.82					1	44.9681	0.00296268	44.968	1	51.009	0.00138547
O15304	Apoptosis regulatory protein Siva	SIVA1	43	2.3088	2.9344			2.2655			3.4511			O15304	43	O15304	O15304	Apoptosis regulatory protein Siva	SIVA1	sp|O15304|SIVA_HUMAN Apoptosis regulatory protein Siva OS=Homo sapiens OX=9606 GN=SIVA1 PE=1 SV=2	0.674793	3.17011	0.0010304	102.06	88.708	60.518									0.64171	2.53103	0.0010304	102.06									0.629625	2.3044	0.0506307
Q8N3C0	Activating signal cointegrator 1 complex subunit 3	ASCC3	312	2.8441	2.861	2.7401	2.5249	2.5631	1.9745	1.3375				Q8N3C0	312	Q8N3C0	Q8N3C0	Activating signal cointegrator 1 complex subunit 3	ASCC3	sp|Q8N3C0|ASCC3_HUMAN Activating signal cointegrator 1 complex subunit 3 OS=Homo sapiens OX=9606 GN=ASCC3 PE=1 SV=3	0.999528	33.2598	1.60802e-22	105.79	98.993	105.79	0.566871	1.16867	0.00218137	60.102	0.568359	1.195	0.00255701	56.548	0.999528	33.2598	1.60802e-22	105.79	0.546894	0.817028	0.0128306	34.692	0.539925	0.695048	0.0563384	27.481
Q96PZ2	Protein FAM111A	FAM111A	30	2.8417		3.0004		2.7344						Q96PZ2	30	Q96PZ2	Q96PZ2	Protein FAM111A	FAM111A	sp|Q96PZ2|F111A_HUMAN Protein FAM111A OS=Homo sapiens OX=9606 GN=FAM111A PE=1 SV=2	1	46.1784	1.32747e-05	51.526	51.526	46.178	1	51.5262	1.32747e-05	51.526					1	46.1784	8.49093e-05	46.178
P24928	DNA-directed RNA polymerase II subunit RPB1	POLR2A	1125	2.8158		4.6877	1.9754	4.0399				1.0212	1.0691	P24928	1125	P24928	P24928	DNA-directed RNA polymerase II subunit RPB1	POLR2A	sp|P24928|RPB1_HUMAN DNA-directed RNA polymerase II subunit RPB1 OS=Homo sapiens OX=9606 GN=POLR2A PE=1 SV=2	1	92.0454	0.00121289	105.17	33.069	105.17	0.999256	31.2795	0.0198265	34.773	0.999959	43.8492	0.00675187	48.188	0.992891	21.4509	0.0519434	23.964
Q86UV5	Ubiquitin carboxyl-terminal hydrolase 48	USP48	839		2.8811									Q86UV5	839	Q86UV5	Q86UV5	Ubiquitin carboxyl-terminal hydrolase 48	USP48	sp|Q86UV5|UBP48_HUMAN Ubiquitin carboxyl-terminal hydrolase 48 OS=Homo sapiens OX=9606 GN=USP48 PE=1 SV=1	1	34.9141	0.000570973	34.914	28.55	34.914
P09429	High mobility group protein B1	HMGB1	146	2.8153		3.2595				0.81148		2.9934	0.74904	P09429	146	P09429	P09429	High mobility group protein B1	HMGB1	sp|P09429|HMGB1_HUMAN High mobility group protein B1 OS=Homo sapiens OX=9606 GN=HMGB1 PE=1 SV=3	0.870558	8.28165	3.48945e-38	141.07	133.08	141.07	0.870558	8.28165	3.48945e-38	141.07	0.499469	0	1.08354e-29	135.28									0.610771	3.61878	0.049839	15.241
Q00688	Peptidyl-prolyl cis-trans isomerase FKBP3	FKBP3	99		2.8671									Q00688	99	Q00688	Q00688	Peptidyl-prolyl cis-trans isomerase FKBP3	FKBP3	sp|Q00688|FKBP3_HUMAN Peptidyl-prolyl cis-trans isomerase FKBP3 OS=Homo sapiens OX=9606 GN=FKBP3 PE=1 SV=1	0.999812	37.2672	0.00341976	39.629	32.572	39.629
Q8N3C0	Activating signal cointegrator 1 complex subunit 3	ASCC3	30	2.8057						0.63922	0.65771			Q8N3C0	30	Q8N3C0	Q8N3C0	Activating signal cointegrator 1 complex subunit 3	ASCC3	sp|Q8N3C0|ASCC3_HUMAN Activating signal cointegrator 1 complex subunit 3 OS=Homo sapiens OX=9606 GN=ASCC3 PE=1 SV=3	0.970321	15.1447	1.01475e-27	147.39	142.12	147.39	0.901356	9.60826	0.0110732	48.323									0.772157	5.3007	0.018183	42.958	0.945611	12.402	0.00028561	76.156	0.912089	10.16	9.44398e-05
Q7L576	Cytoplasmic FMR1-interacting protein 1;Cytoplasmic FMR1-interacting protein 2	CYFIP1;CYFIP2	97;97	2.8054			3.8694			5.4517	2.2958			Q7L576;Q96F07	97;97	Q7L576;Q96F07	Q7L576	Cytoplasmic FMR1-interacting protein 1;Cytoplasmic FMR1-interacting protein 2	CYFIP1;CYFIP2	sp|Q7L576|CYFP1_HUMAN Cytoplasmic FMR1-interacting protein 1 OS=Homo sapiens OX=9606 GN=CYFIP1 PE=1 SV=1;sp|Q96F07|CYFP2_HUMAN Cytoplasmic FMR1-interacting protein 2 OS=Homo sapiens OX=9606 GN=CYFIP2 PE=1 SV=2	1	45.1154	0.00672834	49.929	37.096	45.115					1	41.6438	0.0159101	41.644									1	40.552	0.0171201	40.552	1	45.1154	0.0120628
P27694	Replication protein A 70 kDa DNA-binding subunit;Replication protein A 70 kDa DNA-binding subunit, N-terminally processed	RPA1	167	2.7846	2.805	3.0727	3.0402	2.3115	2.151	1.0238	0.9451	0.86966	0.92709	P27694	167	P27694	P27694	Replication protein A 70 kDa DNA-binding subunit;Replication protein A 70 kDa DNA-binding subunit, N-terminally processed	RPA1	sp|P27694|RFA1_HUMAN Replication protein A 70 kDa DNA-binding subunit OS=Homo sapiens OX=9606 GN=RPA1 PE=1 SV=2	1	138.637	2.41858e-55	168.79	158.88	168.79	1	107.911	1.85218e-29	126.26	1	121.534	3.23401e-49	151.96	1	138.637	2.41858e-55	168.79	1	103.116	1.45958e-19	115.42	1	117.959	1.25009e-38	141.97	1	84.3585	4.90579e-08
O00267	Transcription elongation factor SPT5	SUPT5H	258	2.7362		4.7266	4.8947	3.6056		1.3889				O00267	258	O00267	O00267	Transcription elongation factor SPT5	SUPT5H	sp|O00267|SPT5H_HUMAN Transcription elongation factor SPT5 OS=Homo sapiens OX=9606 GN=SUPT5H PE=1 SV=1	0.99995	43.0113	4.71362e-39	147.09	147.09	103.5	0.999916	40.734	4.71362e-39	147.09	0.999791	36.7921	1.20566e-16	108.49	0.99995	43.0113	8.76566e-14	103.5					0.958174	13.6	2.44261e-05	53.779
Q07820	Induced myeloid leukemia cell differentiation protein Mcl-1	MCL1	244	2.7246	2.4224	2.6472	3.4268				2.6929			Q07820	244	Q07820	Q07820	Induced myeloid leukemia cell differentiation protein Mcl-1	MCL1	sp|Q07820|MCL1_HUMAN Induced myeloid leukemia cell differentiation protein Mcl-1 OS=Homo sapiens OX=9606 GN=MCL1 PE=1 SV=3	1	81.3376	0.0137926	81.338	43.034	81.338	1	48.0038	0.0137926	48.004	1	35.6774	0.0401837	35.677													1	81.3376	0.0152015
P08574	Cytochrome c1, heme protein, mitochondrial	CYC1	50	2.7151	0.56712	1.8424	0.44279	0.45636	0.40268					P08574	50	P08574	P08574	Cytochrome c1, heme protein, mitochondrial	CYC1	sp|P08574|CY1_HUMAN Cytochrome c1, heme protein, mitochondrial OS=Homo sapiens OX=9606 GN=CYC1 PE=1 SV=3	1	36.4511	1.11509e-05	79.837	79.837	36.451	1	71.6009	0.000380693	71.601	1	42.0945	0.00993484	42.095	1	79.8366	1.11509e-05	79.837	1	36.4511	0.00421352	36.451
Q8NC51	Plasminogen activator inhibitor 1 RNA-binding protein	SERBP1	32	2.712	2.612	2.1916	2.2378	1.5554	1.6616	0.92606	0.89956			Q8NC51	32	Q8NC51	Q8NC51	Plasminogen activator inhibitor 1 RNA-binding protein	SERBP1	sp|Q8NC51|PAIRB_HUMAN Plasminogen activator inhibitor 1 RNA-binding protein OS=Homo sapiens OX=9606 GN=SERBP1 PE=1 SV=2	0.997478	25.9718	1.53695e-55	156.74	156.74	150.83	0.791178	5.78498	7.73584e-35	127.05	0.983368	17.7178	4.88346e-18	96.131	0.997156	25.4489	5.1893e-55	152.06	0.997478	25.9718	6.15068e-55	150.83	0.99337	21.7557	7.32967e-22	106.03	0.987163	18.8592	1.53695e-55
Q9H000	Probable E3 ubiquitin-protein ligase makorin-2	MKRN2	334	2.6486	3.146	2.9296	2.5837	1.3179		1.0457	0.93956			Q9H000	334	Q9H000	Q9H000	Probable E3 ubiquitin-protein ligase makorin-2	MKRN2	sp|Q9H000|MKRN2_HUMAN Probable E3 ubiquitin-protein ligase makorin-2 OS=Homo sapiens OX=9606 GN=MKRN2 PE=1 SV=2	1	71.6936	2.61059e-15	115.91	111.11	103.76	1	71.6936	3.29413e-08	103.76	1	65.8221	2.61059e-15	115.91	0.880791	8.68562	0.0204167	26.781					0.998452	28.0961	0.00152743	47.774	0.964333	14.3196	0.0249398
O15126	Secretory carrier-associated membrane protein 1	SCAMP1	298	2.6408	1.5295	1.3761		1.3497		1.0808		1.3827	1.4699	O15126	298	O15126	O15126	Secretory carrier-associated membrane protein 1	SCAMP1	sp|O15126|SCAM1_HUMAN Secretory carrier-associated membrane protein 1 OS=Homo sapiens OX=9606 GN=SCAMP1 PE=1 SV=2	1	106.919	3.17448e-44	142.31	136.49	142.31	0.999996	54.2561	3.60125e-08	62.684					1	106.919	3.17448e-44	142.31					1	64.0588	2.219e-09	71.592
Q9Y4B6	Protein VPRBP	VPRBP	834	2.6268	2.5656	1.4204		1.2214		1.3206	2.6776			Q9Y4B6	834	Q9Y4B6	Q9Y4B6	Protein VPRBP	VPRBP	sp|Q9Y4B6|DCAF1_HUMAN DDB1- and CUL4-associated factor 1 OS=Homo sapiens OX=9606 GN=DCAF1 PE=1 SV=3	1	56.3279	0.00141886	74.524	49.669	56.328	1	74.5239	0.00141886	74.524	1	32.6239	0.0643013	32.624	1	40.2243	0.0226775	40.224					1	50.3139	0.00881739	50.314	1	56.3279	0.00584127
Q9H1I8	Activating signal cointegrator 1 complex subunit 2	ASCC2	14	2.6112	2.5738	2.8979								Q9H1I8	14	Q9H1I8	Q9H1I8	Activating signal cointegrator 1 complex subunit 2	ASCC2	sp|Q9H1I8|ASCC2_HUMAN Activating signal cointegrator 1 complex subunit 2 OS=Homo sapiens OX=9606 GN=ASCC2 PE=1 SV=3	0.909458	10.0193	8.41315e-06	68.944	62.912	64.52	0.843112	7.30295	8.41315e-06	68.944
Q9H0M0	NEDD4-like E3 ubiquitin-protein ligase WWP1	WWP1	480	2.6102	1.3225	0.82386	1.6622	1.9026		1.4828		1.0278	1.1047	Q9H0M0	480	Q9H0M0	Q9H0M0	NEDD4-like E3 ubiquitin-protein ligase WWP1	WWP1	sp|Q9H0M0|WWP1_HUMAN NEDD4-like E3 ubiquitin-protein ligase WWP1 OS=Homo sapiens OX=9606 GN=WWP1 PE=1 SV=1	1	105.897	9.86647e-19	127.57	127.57	105.9	1	115.312	1.09359e-14	115.31	1	105.897	7.99999e-13	105.9	1	123.139	1.68696e-18	123.14					1	36.5966	6.79196e-13	107.34
Q05086	Ubiquitin-protein ligase E3A	UBE3A	81	2.5835	0.83799	0.95351	2.4975	1.1174		2.1173	2.6223			Q05086	81	Q05086	Q05086	Ubiquitin-protein ligase E3A	UBE3A	sp|Q05086|UBE3A_HUMAN Ubiquitin-protein ligase E3A OS=Homo sapiens OX=9606 GN=UBE3A PE=1 SV=4	1	67.8928	0.000409948	98.299	22.92	84.365	0.999997	55.2846	0.000443591	69.314	0.999943	42.4492	0.00202765	73.26	0.9998	36.9961	0.00201746	50.675	0.71511	3.99696	0.00753284	98.299	0.999983	47.7121	0.000621498	66.989	1	67.8928	0.000409948
P16435	NADPH--cytochrome P450 reductase	POR	487	2.5819		3.5797								P16435	487	P16435	P16435	NADPH--cytochrome P450 reductase	POR	sp|P16435|NCPR_HUMAN NADPH--cytochrome P450 reductase OS=Homo sapiens OX=9606 GN=POR PE=1 SV=2	1	31.989	0.0191551	80.834	22.205	31.989	1	42.7884	0.0191551	42.788	1	31.989	0.0675672	31.989
P55769	NHP2-like protein 1;NHP2-like protein 1, N-terminally processed	NHP2L1	21	2.5721	2.7274	1.678	2.0607	1.6186	0.9214	2.2763	0.64483	1.2076		P55769	21	P55769	P55769	NHP2-like protein 1;NHP2-like protein 1, N-terminally processed	NHP2L1	sp|P55769|NH2L1_HUMAN NHP2-like protein 1 OS=Homo sapiens OX=9606 GN=SNU13 PE=1 SV=3	1	138.713	1.00285e-22	138.71	118.93	138.71	1	83.3966	8.78745e-14	101.49	1	126.671	1.29528e-13	126.67	1	105.46	2.73941e-13	105.46	0.500018	0	1.2985e-07	65.784	1	112.147	1.16851e-09	112.15	0.536312	0.631917	9.95942e-12
P49711	Transcriptional repressor CTCF	CTCF	449	2.5671	3.066	2.1179	2.3422	3.0401		1.04	0.82298		0.66607	P49711	449	P49711	P49711	Transcriptional repressor CTCF	CTCF	sp|P49711|CTCF_HUMAN Transcriptional repressor CTCF OS=Homo sapiens OX=9606 GN=CTCF PE=1 SV=1	1	42.3949	0.00084918	82.749	48.029	42.395	1	70.0282	0.00154486	70.028	1	50.3534	0.00459441	50.353	1	68.8931	0.00166545	68.893					1	44.8635	0.00719956	44.863	1	42.3949	0.00837097
Q13485	Mothers against decapentaplegic homolog 4	SMAD4	385	2.5621	1.3571		1.6205	1.6419		2.2847	1.3195	1.0817		Q13485	385	Q13485	Q13485	Mothers against decapentaplegic homolog 4	SMAD4	sp|Q13485|SMAD4_HUMAN Mothers against decapentaplegic homolog 4 OS=Homo sapiens OX=9606 GN=SMAD4 PE=1 SV=1	1	67.2453	8.68518e-05	100.04	68.689	88.803					0.999931	41.6125	0.00518993	55.04	1	67.2453	0.000266056	88.803					0.999985	48.1922	8.68518e-05	80.69	0.998756	29.0473	0.0177043
P62979	Ubiquitin-40S ribosomal protein S27a;Ubiquitin;40S ribosomal protein S27a	RPS27A	113	2.5564	2.6987	2.4216	3.1941	2.4032	2.6126	0.64126	0.66586	1.4371	1.4623	P62979	113	P62979	P62979	Ubiquitin-40S ribosomal protein S27a;Ubiquitin;40S ribosomal protein S27a	RPS27A	sp|P62979|RS27A_HUMAN Ubiquitin-40S ribosomal protein S27a OS=Homo sapiens OX=9606 GN=RPS27A PE=1 SV=2	1	26.5411	1.08538e-92	231.05	231.05	26.541	1	33.7821	3.78007e-14	146.88	1	79.1275	3.15138e-13	154.56	1	57.5673	7.79186e-19	168.76	1	26.5411	4.16669e-29	186.16	1	117.89	4.16669e-29	186.16	1	46.8189	6.91407e-18
P27824	Calnexin	CANX	170	2.5461	1.0014	1.2095		1.0414	0.6451	1.0625	1.4221			P27824	170	P27824	P27824	Calnexin	CANX	sp|P27824|CALX_HUMAN Calnexin OS=Homo sapiens OX=9606 GN=CANX PE=1 SV=2	1	79.9209	1.49603e-12	106.36	106.36	106.36	0.99995	42.9817	5.60106e-05	59.345					1	79.9209	1.49603e-12	106.36	0.999806	37.1146	0.000641849	44.005	0.999996	54.4226	1.48118e-05	65.943	0.991266	20.5498	0.0168804
O14776	Transcription elongation regulator 1	TCERG1	1035	2.5455	1.8445			1.0358		0.95367				O14776	1035	O14776	O14776	Transcription elongation regulator 1	TCERG1	sp|O14776|TCRG1_HUMAN Transcription elongation regulator 1 OS=Homo sapiens OX=9606 GN=TCERG1 PE=1 SV=2	1	66.2667	0.00113336	66.267	41.975	66.267									1	66.2667	0.00113336	66.267					0.999999	61.885	0.001562	62.408
Q15056	Eukaryotic translation initiation factor 4H	EIF4H	123	2.5405				1.104						Q15056	123	Q15056	Q15056	Eukaryotic translation initiation factor 4H	EIF4H	sp|Q15056|IF4H_HUMAN Eukaryotic translation initiation factor 4H OS=Homo sapiens OX=9606 GN=EIF4H PE=1 SV=5	1	41.0291	0.0040095	56.729	56.729	41.029									1	41.0291	0.0591847	41.029
Q92520	Protein FAM3C	FAM3C	193	2.5353		1.5122				0.94044	0.8862			Q92520	193	Q92520	Q92520	Protein FAM3C	FAM3C	sp|Q92520|FAM3C_HUMAN Protein FAM3C OS=Homo sapiens OX=9606 GN=FAM3C PE=1 SV=1	0.999948	42.8024	0.0211709	42.802	33.468	42.802	0.998986	29.9356	0.059576	29.936													0.999948	42.8024	0.0211709	42.802	0.997439	25.9046	0.0747776
Q96SN8	CDK5 regulatory subunit-associated protein 2	CDK5RAP2	489	2.5255	1.5316	3.1397		0.93765		1.1731	1.2737			Q96SN8	489	Q96SN8	Q96SN8	CDK5 regulatory subunit-associated protein 2	CDK5RAP2	sp|Q96SN8|CK5P2_HUMAN CDK5 regulatory subunit-associated protein 2 OS=Homo sapiens OX=9606 GN=CDK5RAP2 PE=1 SV=5	0.999941	42.2679	0.00127964	62.494	52.694	60.937	0.999941	42.2679	0.00149819	60.937					0.99953	33.2762	0.00127964	62.494					0.999706	35.3188	0.00316681	51.073	0.998007	26.9961	0.0192641
Q6NZY4	Zinc finger CCHC domain-containing protein 8	ZCCHC8	589		2.6607						2.5644			Q6NZY4	589	Q6NZY4	Q6NZY4	Zinc finger CCHC domain-containing protein 8	ZCCHC8	sp|Q6NZY4|ZCHC8_HUMAN Zinc finger CCHC domain-containing protein 8 OS=Homo sapiens OX=9606 GN=ZCCHC8 PE=1 SV=2	0.701098	3.70251	0.00388251	35.757	35.757	18.823																					0.5	0	0.00388251
P23634	Plasma membrane calcium-transporting ATPase 4	ATP2B4	735	2.5151	0.74128	0.78461	1.028					0.61384	0.70354	P23634	735	P23634	P23634	Plasma membrane calcium-transporting ATPase 4	ATP2B4	sp|P23634|AT2B4_HUMAN Plasma membrane calcium-transporting ATPase 4 OS=Homo sapiens OX=9606 GN=ATP2B4 PE=1 SV=2	1	21.2509	6.81564e-05	79.885	79.885	21.251	0.99625	25.0188	0.048843	45.825	0.999985	48.2292	6.81564e-05	79.885
Q13148	TAR DNA-binding protein 43	TARDBP	160	2.5066	0.55171	0.7285				0.40269				Q13148	160	Q13148	Q13148	TAR DNA-binding protein 43	TARDBP	sp|Q13148|TADBP_HUMAN TAR DNA-binding protein 43 OS=Homo sapiens OX=9606 GN=TARDBP PE=1 SV=1	1	28.5455	0.000134352	66.285	61.655	28.546	1	50.8431	0.00456637	50.843													1	55.196	0.0034211	55.196
Q96HA1	Nuclear envelope pore membrane protein POM 121	POM121	112		2.6499			1.1485						Q96HA1	112	Q96HA1	Q96HA1	Nuclear envelope pore membrane protein POM 121	POM121	sp|Q96HA1|P121A_HUMAN Nuclear envelope pore membrane protein POM 121 OS=Homo sapiens OX=9606 GN=POM121 PE=1 SV=2	1	36.2532	0.0146443	36.253	27.544	36.253									1	12.8484	0.0665546	12.848
P62913	60S ribosomal protein L11	RPL11	88		2.6424			5.8252			2.7142			P62913	88	P62913	P62913	60S ribosomal protein L11	RPL11	sp|P62913|RL11_HUMAN 60S ribosomal protein L11 OS=Homo sapiens OX=9606 GN=RPL11 PE=1 SV=2	0.634249	2.39075	0.00539911	69.954	14.386	69.954									0.634249	2.39075	0.0293848	69.954									0.605043	1.85236	0.0105463
Q92541	RNA polymerase-associated protein RTF1 homolog	RTF1	202		2.6364									Q92541	202	Q92541	Q92541	RNA polymerase-associated protein RTF1 homolog	RTF1	sp|Q92541|RTF1_HUMAN RNA polymerase-associated protein RTF1 homolog OS=Homo sapiens OX=9606 GN=RTF1 PE=1 SV=4	1	34.7546	0.0198572	34.755	30.581	34.755
Q9P2E9	Ribosome-binding protein 1	RRBP1	559	2.5049	2.3556	2.2217	2.515	3.0677						Q9P2E9	559	Q9P2E9	Q9P2E9	Ribosome-binding protein 1	RRBP1	sp|Q9P2E9|RRBP1_HUMAN Ribosome-binding protein 1 OS=Homo sapiens OX=9606 GN=RRBP1 PE=1 SV=5	0.999728	35.6491	1.8389e-16	104.84	94.879	104.84	0.994909	22.91	0.0171791	35.852	0.999175	30.8342	5.92619e-11	85.203	0.997498	26.0061	2.24967e-07	68.639									0.996099	24.0716	0.00524872
Q9NYS0	NF-kappa-B inhibitor-interacting Ras-like protein 1	NKIRAS1	54	2.4984										Q9NYS0	54	Q9NYS0	Q9NYS0	NF-kappa-B inhibitor-interacting Ras-like protein 1	NKIRAS1	sp|Q9NYS0|KBRS1_HUMAN NF-kappa-B inhibitor-interacting Ras-like protein 1 OS=Homo sapiens OX=9606 GN=NKIRAS1 PE=1 SV=1	1	33.317	0.0125296	46.481	28.894	33.317
O00232	26S proteasome non-ATPase regulatory subunit 12	PSMD12	212	2.4937		1.1374	0.73171		0.32828	0.91543	0.93526			O00232	212	O00232	O00232	26S proteasome non-ATPase regulatory subunit 12	PSMD12	sp|O00232|PSD12_HUMAN 26S proteasome non-ATPase regulatory subunit 12 OS=Homo sapiens OX=9606 GN=PSMD12 PE=1 SV=3	1	76.753	1.47495e-09	110.44	95.051	110.44	1	76.753	1.47495e-09	110.44	0.999973	45.638	0.000735413	59.227					0.999975	46.0479	0.000738796	59.185	0.998374	27.8818	0.0401244	33.787	0.998674	28.7674	0.0419612
Q14157	Ubiquitin-associated protein 2-like	UBAP2L	102	2.2919	2.6067	3.3969	2.4261	1.9245		1.2143				Q14157	102	Q14157	Q14157	Ubiquitin-associated protein 2-like	UBAP2L	sp|Q14157|UBP2L_HUMAN Ubiquitin-associated protein 2-like OS=Homo sapiens OX=9606 GN=UBAP2L PE=1 SV=2	0.559757	1.04307	4.1984e-80	180.83	180.83	180.83	0.543153	0.751513	5.47437e-55	150.29	0.548346	0.842487	4.40445e-35	130	0.550208	0.87516	3.99647e-44	139.17					0.540766	0.709757	1.7184e-18	100.92
K7EQS6	Zinc transporter ZIP3	SLC39A3	36;36	2.488		1.9748	4.9664					0.88751	0.92552	K7EQS6;Q9BRY0	36;36	K7EQS6	K7EQS6	Zinc transporter ZIP3	SLC39A3	tr|K7EQS6|K7EQS6_HUMAN Uncharacterized protein (Fragment) OS=Homo sapiens OX=9606 PE=4 SV=1;sp|Q9BRY0|S39A3_HUMAN Zinc transporter ZIP3 OS=Homo sapiens OX=9606 GN=SLC39A3 PE=1 SV=2	1	101.929	1.98741e-12	140.3	140.3	101.93	1	127.424	6.98482e-12	127.42	1	101.929	8.31936e-06	101.93
Q6Y1H2	Very-long-chain (3R)-3-hydroxyacyl-CoA dehydratase 2	HACD2	11	2.481	2.7333	1.1828	1.6261	2.2748	1.4364	1.1728	1.0399	1.1907		Q6Y1H2	11	Q6Y1H2	Q6Y1H2	Very-long-chain (3R)-3-hydroxyacyl-CoA dehydratase 2	HACD2	sp|Q6Y1H2|HACD2_HUMAN Very-long-chain (3R)-3-hydroxyacyl-CoA dehydratase 2 OS=Homo sapiens OX=9606 GN=HACD2 PE=1 SV=1	1	80.9793	3.33591e-19	130.01	78.079	80.979	1	80.9793	2.20143e-06	80.979	1	32.9948	3.33591e-19	119.45	1	101.929	3.08752e-10	101.93	1	37.4256	6.29106e-08	75.911	1	36.8469	1.14451e-08	83.966	1	87.1483	7.81813e-09
Q9NRD5	PRKCA-binding protein	PICK1	209	2.4769			9.1088	0.81936						Q9NRD5	209	Q9NRD5	Q9NRD5	PRKCA-binding protein	PICK1	sp|Q9NRD5|PICK1_HUMAN PRKCA-binding protein OS=Homo sapiens OX=9606 GN=PICK1 PE=1 SV=2	1	23.7265	3.64497e-07	85.808	80.028	23.726					1	23.7265	0.0739623	23.726	1	85.8082	3.64497e-07	85.808
P39019	40S ribosomal protein S19	RPS19	29	2.4642	2.8749	2.937	2.8496	2.2345	2.3714	0.76048	0.93127			P39019	29	P39019	P39019	40S ribosomal protein S19	RPS19	sp|P39019|RS19_HUMAN 40S ribosomal protein S19 OS=Homo sapiens OX=9606 GN=RPS19 PE=1 SV=2	1	122.699	1.63321e-09	122.7	122.7	122.7	1	122.699	1.63321e-09	122.7	1	100.931	1.0936e-05	100.93	1	100.931	1.0936e-05	100.93	1	83.3141	0.000139931	83.314	1	90.6136	6.32035e-05	90.614	1	78.6968	0.000185906
Q9P1Y6	PHD and RING finger domain-containing protein 1	PHRF1	668	2.4532	2.385	1.9844	1.734	2.007	2.7272	0.84412	0.96522			Q9P1Y6	668	Q9P1Y6	Q9P1Y6	PHD and RING finger domain-containing protein 1	PHRF1	sp|Q9P1Y6|PHRF1_HUMAN PHD and RING finger domain-containing protein 1 OS=Homo sapiens OX=9606 GN=PHRF1 PE=1 SV=3	1	74.7599	1.05705e-06	96.103	96.103	74.76	1	75.4785	9.09833e-05	84.718	1	71.2408	0.000112224	72.958	1	83.3141	2.68865e-05	83.314	1	74.7599	9.70387e-05	74.76	1	56.1224	2.45127e-05	84.289	1	51.2109	0.000157521
Q92466	DNA damage-binding protein 2	DDB2	151	2.4512	2.4779	1.8954		2.7067		1.116	1.059			Q92466	151	Q92466	Q92466	DNA damage-binding protein 2	DDB2	sp|Q92466|DDB2_HUMAN DNA damage-binding protein 2 OS=Homo sapiens OX=9606 GN=DDB2 PE=1 SV=1	0.999994	52.1203	1.78116e-16	107.33	102.34	107.33	0.999973	47.0042	4.27693e-13	100.28	0.987776	20.7314	0.00900202	48.656	0.999994	52.1203	1.78116e-16	107.33	0.995041	25.824	0.00919515	48.477	0.999955	44.3813	6.86915e-10	82.265	0.996445	24.9671	2.45555e-05
P67809	Y-box-binding protein 3;Nuclease-sensitive element-binding protein 1;Y-box-binding protein 2	YBX3;YBX1;YBX2	113;81;116	2.4477	2.3638	2.0091	1.9716	2.1393	2.0796	0.87012	0.83608		0.87032	P16989;P67809;Q9Y2T7	113;81;116	P16989;P67809	P67809	Y-box-binding protein 3;Nuclease-sensitive element-binding protein 1;Y-box-binding protein 2	YBX3;YBX1;YBX2	sp|P16989|YBOX3_HUMAN Y-box-binding protein 3 OS=Homo sapiens OX=9606 GN=YBX3 PE=1 SV=4;sp|P67809|YBOX1_HUMAN Nuclease-sensitive element-binding protein 1 OS=Homo sapiens OX=9606 GN=YBX1 PE=1 SV=3;sp|Q9Y2T7|YBOX2_HUMAN Y-box-binding protein 2 OS=Homo sapie	1	184.571	5.2685e-88	223.72	223.72	223.72	1	138.141	2.02982e-36	169.62	1	103.812	7.78175e-16	119.23	1	92.4528	2.4441e-22	131.45	1	125.019	6.92076e-29	151.8	1	78.3188	5.94292e-09	104.28	1	120.053	1.23231e-27
O00219	Hyaluronan synthase 3	HAS3	78	2.4414	4.8543	2.6458	0.6427			19.933		0.66067	0.67251	O00219	78	O00219	O00219	Hyaluronan synthase 3	HAS3	sp|O00219|HYAS3_HUMAN Hyaluronan synthase 3 OS=Homo sapiens OX=9606 GN=HAS3 PE=1 SV=3	1	65.3469	1.33594e-05	122.51	79.488	65.347	1	36.8469	0.0164242	73.067	1	27.4093	0.0699203	27.409									1	44.5638	0.00794329	70.552	1	65.3469	0.0312967
Q86UV5	Ubiquitin carboxyl-terminal hydrolase 48	USP48	681	2.4401	3.1624	2.9531	6.2387	2.0068	3.3381		1.1336			Q86UV5	681	Q86UV5	Q86UV5	Ubiquitin carboxyl-terminal hydrolase 48	USP48	sp|Q86UV5|UBP48_HUMAN Ubiquitin carboxyl-terminal hydrolase 48 OS=Homo sapiens OX=9606 GN=USP48 PE=1 SV=1	1	68.1574	3.63448e-22	128.71	128.71	128.71	0.999998	57.1653	1.04432e-10	104.94	0.999993	51.4946	7.42333e-11	107.98	1	68.1574	3.63448e-22	128.71	0.999973	45.6877	4.03973e-05	69.878					0.999882	39.2808	1.3453e-05
P24928	DNA-directed RNA polymerase II subunit RPB1	POLR2A	853	2.4251	2.1145	2.1657	2.1277	1.9522	1.6085	0.73658	0.88174	1.0468	1.044	P24928	853	P24928	P24928	DNA-directed RNA polymerase II subunit RPB1	POLR2A	sp|P24928|RPB1_HUMAN DNA-directed RNA polymerase II subunit RPB1 OS=Homo sapiens OX=9606 GN=POLR2A PE=1 SV=2	1	100.353	7.74276e-35	141	125.85	100.35	1	130.555	3.66325e-26	130.56	1	112.299	8.7419e-15	114.29	1	97.2353	2.5201e-26	132.59	1	100.353	8.94759e-11	100.35	1	56.407	2.60901e-05	56.407	1	47.0904	7.56463e-08
Q07352	Zinc finger protein 36, C3H1 type-like 1	ZFP36L1	72	2.4231	3.6652	1.7471		1.149		1.2082		3.2381		Q07352	72	Q07352	Q07352	Zinc finger protein 36, C3H1 type-like 1	ZFP36L1	sp|Q07352|TISB_HUMAN mRNA decay activator protein ZFP36L1 OS=Homo sapiens OX=9606 GN=ZFP36L1 PE=1 SV=1	1	50.8699	3.36034e-26	119.38	108.69	50.87	1	55.4527	0.000400574	55.453					1	119.377	3.36034e-26	119.38					1	41.7112	1.27606e-05	71.073
Q16531	DNA damage-binding protein 1	DDB1	204	2.4192	2.5497	2.8349	3.2991	2.5129	2.3859	0.98535	1.174			Q16531	204	Q16531	Q16531	DNA damage-binding protein 1	DDB1	sp|Q16531|DDB1_HUMAN DNA damage-binding protein 1 OS=Homo sapiens OX=9606 GN=DDB1 PE=1 SV=1	1	74.8926	2.43374e-11	159.37	123.92	159.37	0.999999	59.1708	0.000974499	113.7	0.999998	57.0293	2.47638e-06	120.07	1	74.8926	2.43374e-11	159.37	0.999919	40.8967	0.0229331	68.422	0.999985	48.2342	0.00242254	86.472	0.999827	37.6282	0.0106406
P16989	Y-box-binding protein 3	YBX3	150	2.4178	2.599	2.0133	2.0938	3.2993	4.0114	1.4549	1.3761			P16989	150	P16989	P16989	Y-box-binding protein 3	YBX3	sp|P16989|YBOX3_HUMAN Y-box-binding protein 3 OS=Homo sapiens OX=9606 GN=YBX3 PE=1 SV=4	1	69.4819	2.44194e-49	115.44	115.44	69.482	1	29.3687	0.00147921	29.369	1	42.0241	3.07514e-08	42.024	1	93.9678	1.50471e-35	93.968	1	69.4819	6.22216e-47	114.76	1	25.2221	1.22494e-27	90.485	1	81.4874	2.19938e-21
Q71RC2	La-related protein 4	LARP4	476	2.4108		1.7656	1.6793	2.0014	1.296	2.0575	1.7991			Q71RC2	476	Q71RC2	Q71RC2	La-related protein 4	LARP4	sp|Q71RC2|LARP4_HUMAN La-related protein 4 OS=Homo sapiens OX=9606 GN=LARP4 PE=1 SV=3	1	27.3203	1.71972e-05	69.947	49.133	27.32	1	61.6164	7.91331e-05	61.616	1	27.9613	0.0360549	27.961	1	69.9475	1.71972e-05	69.947	1	27.3203	0.0405946	27.32	1	58.4793	0.000234289	58.479	1	27.9279	0.0362916
Q9Y3A5	Ribosome maturation protein SBDS	SBDS	225	2.3762	1.307	1.8652	2.17	2.5595		1.558	1.3393			Q9Y3A5	225	Q9Y3A5	Q9Y3A5	Ribosome maturation protein SBDS	SBDS	sp|Q9Y3A5|SBDS_HUMAN Ribosome maturation protein SBDS OS=Homo sapiens OX=9606 GN=SBDS PE=1 SV=4	0.998868	29.4578	1.21545e-26	155.51	99.388	135.6	0.977147	16.3101	0.00236348	127.12	0.997671	26.3186	0.00124556	146.21	0.998193	27.422	0.00057103	148.04					0.725357	4.21783	1.21545e-26	155.51	0.972603	15.5023	0.00244343
Q8NC51	Plasminogen activator inhibitor 1 RNA-binding protein	SERBP1	228	2.3727	2.526	2.3761	2.6327	1.7039	1.4515	0.74312	0.58492			Q8NC51	228	Q8NC51	Q8NC51	Plasminogen activator inhibitor 1 RNA-binding protein	SERBP1	sp|Q8NC51|PAIRB_HUMAN Plasminogen activator inhibitor 1 RNA-binding protein OS=Homo sapiens OX=9606 GN=SERBP1 PE=1 SV=2	1	81.7823	4.66601e-61	179.95	169.83	179.95	1	72.4732	3.64545e-49	151.96	1	63.1808	1.33115e-13	99.86	0.999989	49.6246	1.35215e-11	89.011	0.999992	50.917	2.02716e-09	74.364	0.999996	53.9657	1.75249e-13	99.059	0.999995	53.3005	1.33404e-13
Q9NTK5	Obg-like ATPase 1	OLA1	354	2.3646	1.9908	1.5176	3.4367	1.6511		1.1143				Q9NTK5	354	Q9NTK5	Q9NTK5	Obg-like ATPase 1	OLA1	sp|Q9NTK5|OLA1_HUMAN Obg-like ATPase 1 OS=Homo sapiens OX=9606 GN=OLA1 PE=1 SV=2	1	72.1266	1.75149e-15	119.32	113.6	119.32	1	72.1266	1.75149e-15	119.32	1	71.9976	7.71089e-11	112.02	0.999868	38.8006	6.99663e-06	88.73					0.997344	25.7465	0.00095742	50.305	0.995736	23.6831	0.0494942
Q5QJE6	Deoxynucleotidyltransferase terminal-interacting protein 2	DNTTIP2	10	2.3631	2.0059		1.141	2.4154		1.0288	0.44915			Q5QJE6	10	Q5QJE6	Q5QJE6	Deoxynucleotidyltransferase terminal-interacting protein 2	DNTTIP2	sp|Q5QJE6|TDIF2_HUMAN Deoxynucleotidyltransferase terminal-interacting protein 2 OS=Homo sapiens OX=9606 GN=DNTTIP2 PE=1 SV=2	1	89.6364	1.07363e-07	89.636	77.721	89.636	0.999993	51.4954	0.00433728	51.495	0.999997	55.8644	0.000104918	55.864	1	89.6364	1.07363e-07	89.636					1	63.6908	2.21093e-05	63.691	0.999999	58.9802	6.1135e-05
P53350	Serine/threonine-protein kinase PLK1	PLK1	574	2.362	2.5963	1.9648	2.9225	1.9243	2.3308	0.72233	0.96157			P53350	574	P53350	P53350	Serine/threonine-protein kinase PLK1	PLK1	sp|P53350|PLK1_HUMAN Serine/threonine-protein kinase PLK1 OS=Homo sapiens OX=9606 GN=PLK1 PE=1 SV=1	1	51.7977	1.6101e-39	158.17	135.69	51.798	1	158.166	1.6101e-39	158.17	1	145.098	6.82366e-34	145.1	1	134.855	2.7087e-25	134.85	1	51.7977	0.000162062	51.798	1	157.035	4.94802e-39	157.03	1	124.923	1.41875e-18
P19447	TFIIH basal transcription factor complex helicase XPB subunit	ERCC3	222	2.3604	1.8949	1.8426	2.3699	2.7382		0.81706	0.95524			P19447	222	P19447	P19447	TFIIH basal transcription factor complex helicase XPB subunit	ERCC3	sp|P19447|ERCC3_HUMAN General transcription and DNA repair factor IIH helicase subunit XPB OS=Homo sapiens OX=9606 GN=ERCC3 PE=1 SV=1	1	72.4463	2.19578e-09	95.094	81.958	72.446	1	87.8504	7.70001e-08	87.85	1	73.1099	8.1517e-07	73.11	1	92.9925	1.2697e-08	92.993					1	70.8023	0.00016739	70.802	1	72.4463	8.6066e-07
Q96I24	Far upstream element-binding protein 3	FUBP3	378	2.3341	2.2754	2.6714	2.0915	1.7352		0.73514		0.49684	0.76333	Q96I24	378	Q96I24	Q96I24	Far upstream element-binding protein 3	FUBP3	sp|Q96I24|FUBP3_HUMAN Far upstream element-binding protein 3 OS=Homo sapiens OX=9606 GN=FUBP3 PE=1 SV=2	1	134.288	1.13609e-54	166.06	166.06	134.29	1	166.063	1.13609e-54	166.06	1	134.288	2.02995e-38	138.28	1	138.039	1.00226e-49	156.85					1	62.002	2.46571e-07	62.002
P25490	Transcriptional repressor protein YY1	YY1	208	2.3186									0.97931	P25490	208	P25490	P25490	Transcriptional repressor protein YY1	YY1	sp|P25490|TYY1_HUMAN Transcriptional repressor protein YY1 OS=Homo sapiens OX=9606 GN=YY1 PE=1 SV=2	0.983563	17.7697	0.0210253	63.694	24.546	18.606
Q9Y2S6	Translation machinery-associated protein 7	TMA7	50	2.3176	2.2351	2.1012	2.0729	1.8439	2.2073	0.85889	0.82495		1.2629	Q9Y2S6	50	Q9Y2S6	Q9Y2S6	Translation machinery-associated protein 7	TMA7	sp|Q9Y2S6|TMA7_HUMAN Translation machinery-associated protein 7 OS=Homo sapiens OX=9606 GN=TMA7 PE=1 SV=1	1	74.3839	8.84688e-07	103.34	103.34	103.34	1	64.4405	0.000113675	85.813	0.999999	61.0925	5.7313e-05	90.05	0.999998	57.9854	0.000129029	84.658	1	65.8828	0.000430488	74.841	1	67.2727	6.19846e-06	95.477	0.999998	56.1988	0.000521737
Q63HN8	E3 ubiquitin-protein ligase RNF213	RNF213	1079	2.3174		1.9004	0.51335						0.98612	Q63HN8	1079	Q63HN8	Q63HN8	E3 ubiquitin-protein ligase RNF213	RNF213	sp|Q63HN8|RN213_HUMAN E3 ubiquitin-protein ligase RNF213 OS=Homo sapiens OX=9606 GN=RNF213 PE=1 SV=3	1	48.7409	9.2882e-05	86.014	66.252	48.741	1	77.6774	9.2882e-05	86.014	1	61.4352	0.00167001	61.435	1	55.4522	0.00826826	55.452									1	48.7409	0.0155838
Q7L014	Probable ATP-dependent RNA helicase DDX46	DDX46	863	2.3093						0.97325				Q7L014	863	Q7L014	Q7L014	Probable ATP-dependent RNA helicase DDX46	DDX46	sp|Q7L014|DDX46_HUMAN Probable ATP-dependent RNA helicase DDX46 OS=Homo sapiens OX=9606 GN=DDX46 PE=1 SV=2	1	44.0521	0.000153863	44.052	37.254	44.052																	1	44.0521	0.000153863	44.052
P62979	Ubiquitin-40S ribosomal protein S27a;Ubiquitin;40S ribosomal protein S27a	RPS27A	107	2.3014	2.1102	2.1626	2.4598	1.9909	2.5193	0.61757	0.64709	1.4228	1.3966	P62979	107	P62979	P62979	Ubiquitin-40S ribosomal protein S27a;Ubiquitin;40S ribosomal protein S27a	RPS27A	sp|P62979|RS27A_HUMAN Ubiquitin-40S ribosomal protein S27a OS=Homo sapiens OX=9606 GN=RPS27A PE=1 SV=2	1	26.5411	2.10867e-12	136.99	121	26.541	1	33.7821	2.10867e-12	136.99	0.998734	28.9716	4.19787e-05	83.314	1	57.5673	2.89457e-05	86.911	1	26.5411	0.00082615	62.705	0.983705	17.808	0.000580626	66.393	0.988055	19.176	0.00151268
O60566	Mitotic checkpoint serine/threonine-protein kinase BUB1 beta	BUB1B	475	1.6927	2.4748									O60566	475	O60566	O60566	Mitotic checkpoint serine/threonine-protein kinase BUB1 beta	BUB1B	sp|O60566|BUB1B_HUMAN Mitotic checkpoint serine/threonine-protein kinase BUB1 beta OS=Homo sapiens OX=9606 GN=BUB1B PE=1 SV=3	0.5	0	0.00448356	32.746	32.746	32.746
O60566	Mitotic checkpoint serine/threonine-protein kinase BUB1 beta	BUB1B	479	1.6927	2.4748									O60566	479	O60566	O60566	Mitotic checkpoint serine/threonine-protein kinase BUB1 beta	BUB1B	sp|O60566|BUB1B_HUMAN Mitotic checkpoint serine/threonine-protein kinase BUB1 beta OS=Homo sapiens OX=9606 GN=BUB1B PE=1 SV=3	0.5	0	0.00448356	32.746	32.746	32.746
Q92616	Translational activator GCN1	GCN1L1	1663	2.2893	0.85717		1.4218							Q92616	1663	Q92616	Q92616	Translational activator GCN1	GCN1L1	sp|Q92616|GCN1_HUMAN eIF-2-alpha kinase activator GCN1 OS=Homo sapiens OX=9606 GN=GCN1 PE=1 SV=6	1	114.203	4.29407e-30	114.2	114.2	114.2					1	114.203	4.29407e-30	114.2
Q15149	Plectin	PLEC	128	2.269	2.2818	1.9854	2.1061	2.1578	2.1872	1.1407	1.1016		0.71623	Q15149	128	Q15149	Q15149	Plectin	PLEC	sp|Q15149|PLEC_HUMAN Plectin OS=Homo sapiens OX=9606 GN=PLEC PE=1 SV=3	1	63.8269	8.29156e-43	166.9	166.9	63.827	1	41.5403	8.29156e-43	166.9	1	48.8834	4.89427e-07	76.145	1	41.8708	9.62936e-06	63.46	1	63.8269	1.85802e-10	103.66	1	55.5888	8.5172e-10	100.04	1	16.1226	5.83896e-07
P24928	DNA-directed RNA polymerase II subunit RPB1	POLR2A	812	2.2585	1.4872	1.6548	1.3276	1.9991	1.5597					P24928	812	P24928	P24928	DNA-directed RNA polymerase II subunit RPB1	POLR2A	sp|P24928|RPB1_HUMAN DNA-directed RNA polymerase II subunit RPB1 OS=Homo sapiens OX=9606 GN=POLR2A PE=1 SV=2	1	23.531	1.55828e-05	76.85	76.85	23.531	1	35.5269	0.00426845	35.527	1	28.9565	0.00803973	28.956	1	75.5742	1.74766e-05	75.574	1	23.531	0.0251823	23.531
Q15691	Microtubule-associated protein RP/EB family member 1	MAPRE1	83	2.2258	2.9564	2.4665	1.9849	2.4801		1.9638	1.6448			Q15691	83	Q15691	Q15691	Microtubule-associated protein RP/EB family member 1	MAPRE1	sp|Q15691|MARE1_HUMAN Microtubule-associated protein RP/EB family member 1 OS=Homo sapiens OX=9606 GN=MAPRE1 PE=1 SV=3	1	59.2052	0.0197521	72.234	22.194	59.205	1	64.8033	0.0317614	64.803	1	70.2676	0.0229295	70.268	1	60.3582	0.0426007	60.358					1	72.2335	0.0197521	72.234	1	59.2052	0.0472756
P15924	Desmoplakin	DSP	931	2.2202	1.829	1.9061	1.928	1.7396	1.6154	1.6004	1.4765		1.2561	P15924	931	P15924	P15924	Desmoplakin	DSP	sp|P15924|DESP_HUMAN Desmoplakin OS=Homo sapiens OX=9606 GN=DSP PE=1 SV=3	1	114.416	5.50833e-44	180.7	180.7	167.98	1	96.3705	5.50833e-44	180.7	1	86.7673	9.01513e-38	177.74	1	97.6526	6.34742e-34	169.37	1	85.8945	5.54667e-44	180.62	1	103.777	6.66049e-33	167.88	0.999624	34.2425	7.04229e-27
Q07157	Tight junction protein ZO-1	TJP1	348	2.2173		1.2878	1.3441	0.71077				0.72439	0.74757	Q07157	348	Q07157	Q07157	Tight junction protein ZO-1	TJP1	sp|Q07157|ZO1_HUMAN Tight junction protein ZO-1 OS=Homo sapiens OX=9606 GN=TJP1 PE=1 SV=3	1	65.7091	0.00287744	95.483	50.503	95.483	0.998422	28.0109	0.0170182	28.791	0.999835	37.8321	0.00708527	38.189	0.999982	47.3478	0.00287744	47.915
P68104	Elongation factor 1-alpha 1;Putative elongation factor 1-alpha-like 3	EEF1A1;EEF1A1P5	244;244	2.2158	0.98317	0.96794	0.89576	1.0847	0.99361	0.87579	0.76673			P68104;Q5VTE0	244;244	P68104	P68104	Elongation factor 1-alpha 1;Putative elongation factor 1-alpha-like 3	EEF1A1;EEF1A1P5	sp|P68104|EF1A1_HUMAN Elongation factor 1-alpha 1 OS=Homo sapiens OX=9606 GN=EEF1A1 PE=1 SV=1;sp|Q5VTE0|EF1A3_HUMAN Putative elongation factor 1-alpha-like 3 OS=Homo sapiens OX=9606 GN=EEF1A1P5 PE=5 SV=1	1	92.1213	1.90881e-119	196.41	196.41	92.121	1	106.042	1.22094e-72	148	1	149.04	1.90881e-119	196.41	1	84.3648	1.93555e-111	190.93	1	81.6826	2.06704e-14	81.683	1	87.4889	1.3509e-27	94.446	1	66.1383	4.17768e-52
Q8NEL9	Phospholipase DDHD1	DDHD1	587	2.2101	0.73746			0.62399	5.7757	0.89607	1.4327	1.2585	1.3053	Q8NEL9	587	Q8NEL9	Q8NEL9	Phospholipase DDHD1	DDHD1	sp|Q8NEL9|DDHD1_HUMAN Phospholipase DDHD1 OS=Homo sapiens OX=9606 GN=DDHD1 PE=1 SV=2	1	38.021	0.0013584	83.045	77.593	38.021									1	63.6941	0.0014191	63.694	1	38.021	0.00727355	38.021	1	59.3668	0.0018285	59.367	1	37.4256	0.0256511
P10155	60 kDa SS-A/Ro ribonucleoprotein	TROVE2	172		2.4167	2.5213		2.0183						P10155	172	P10155	P10155	60 kDa SS-A/Ro ribonucleoprotein	TROVE2	sp|P10155|RO60_HUMAN 60 kDa SS-A/Ro ribonucleoprotein OS=Homo sapiens OX=9606 GN=TROVE2 PE=1 SV=2	0.55134	0.895024	0.0194055	38.086	38.086	38.086	0.520477	0.355926	0.0493278	20.096					0.5	0	0.0194055	27.664
Q14157	Ubiquitin-associated protein 2-like	UBAP2L	101	2.1901	2.4145	3.1013	2.0312	2.2428		1.5035				Q14157	101	Q14157	Q14157	Ubiquitin-associated protein 2-like	UBAP2L	sp|Q14157|UBP2L_HUMAN Ubiquitin-associated protein 2-like OS=Homo sapiens OX=9606 GN=UBAP2L PE=1 SV=2	0.5	0	5.96237e-56	157.79	157.79	67.43	0.5	0	5.47437e-55	150.29	0.5	0	3.22346e-05	67.43	0.5	0	8.39771e-10	85.146					0.5	0	1.01263e-15	85.974
P31946	14-3-3 protein beta/alpha;14-3-3 protein beta/alpha, N-terminally processed	YWHAB	140	2.2009	0.98467	1.2832	1.0899	1.2986	1.1186	1.2455	1.1748	1.3172	1.2538	P31946	140	P31946	P31946	14-3-3 protein beta/alpha;14-3-3 protein beta/alpha, N-terminally processed	YWHAB	sp|P31946|1433B_HUMAN 14-3-3 protein beta/alpha OS=Homo sapiens OX=9606 GN=YWHAB PE=1 SV=3	1	125.529	2.65152e-62	145.58	145.58	143.89	0.999998	56.8037	1.59245e-09	63.085	1	125.529	3.32539e-62	143.89	1	112.937	2.65152e-62	144.7	1	102.135	1.46194e-38	113.6	1	96.276	1.5406e-38	113.5	1	81.9016	3.37306e-28
Q8NC51	Plasminogen activator inhibitor 1 RNA-binding protein	SERBP1	122	2.1904	2.3914	2.3357	2.1392	1.6123	1.8906	0.86837	0.7408			Q8NC51	122	Q8NC51	Q8NC51	Plasminogen activator inhibitor 1 RNA-binding protein	SERBP1	sp|Q8NC51|PAIRB_HUMAN Plasminogen activator inhibitor 1 RNA-binding protein OS=Homo sapiens OX=9606 GN=SERBP1 PE=1 SV=2	1	76.8502	5.98037e-44	182.18	150.79	76.85	1	133.449	8.95281e-18	133.45	1	94.5445	3.0238e-28	147.7	1	32.9464	6.09331e-27	140.81	1	76.8502	5.54111e-16	122.31	1	123.968	3.65114e-32	162.41	1	143.142	4.13212e-27
Q8NC51	Plasminogen activator inhibitor 1 RNA-binding protein	SERBP1	52	2.1894	2.0447	1.956	1.9664	1.4418	1.6817	1.0359	0.83952	0.95813	1.0249	Q8NC51	52	Q8NC51	Q8NC51	Plasminogen activator inhibitor 1 RNA-binding protein	SERBP1	sp|Q8NC51|PAIRB_HUMAN Plasminogen activator inhibitor 1 RNA-binding protein OS=Homo sapiens OX=9606 GN=SERBP1 PE=1 SV=2	1	176.326	1.09231e-212	256.2	256.2	256.2	1	89.1869	6.43877e-38	111.43	1	176.326	1.09231e-212	256.2	1	133.295	5.72598e-101	174.86	1	111.469	1.62262e-61	138.23	1	150.844	1.96937e-131	211.66	1	129.474	4.78855e-110
Q13557	Calcium/calmodulin-dependent protein kinase type II subunit delta	CAMK2D	251	2.187	1.3583					1.5713	2.7422			Q13557	251	Q13557	Q13557	Calcium/calmodulin-dependent protein kinase type II subunit delta	CAMK2D	sp|Q13557|KCC2D_HUMAN Calcium/calmodulin-dependent protein kinase type II subunit delta OS=Homo sapiens OX=9606 GN=CAMK2D PE=1 SV=3	0.999959	43.8781	4.0263e-05	94.023	73.36	94.023																	0.999894	39.7293	0.00341664	80.318	0.998644	28.67	0.00738858
Q00341	Vigilin	HDLBP	1240	2.1821	1.4923	1.3442	1.5926	1.3424	1.3764	0.84192				Q00341	1240	Q00341	Q00341	Vigilin	HDLBP	sp|Q00341|VIGLN_HUMAN Vigilin OS=Homo sapiens OX=9606 GN=HDLBP PE=1 SV=2	0.999998	57.5715	5.5643e-09	59.275	59.275	59.275	0.992393	21.1548	0.00445699	21.169	0.999995	52.6223	2.09235e-08	53.482	0.999998	57.5715	5.5643e-09	59.275	0.999925	41.257	7.24036e-07	41.734	0.999978	46.6047	1.96064e-07	48.422
Q6Y7W6	PERQ amino acid-rich with GYF domain-containing protein 2	GIGYF2	973	2.1813	1.8077	1.8045	1.7491	1.3716		0.95491				Q6Y7W6	973	Q6Y7W6	Q6Y7W6	PERQ amino acid-rich with GYF domain-containing protein 2	GIGYF2	sp|Q6Y7W6|GGYF2_HUMAN GRB10-interacting GYF protein 2 OS=Homo sapiens OX=9606 GN=GIGYF2 PE=1 SV=1	1	126.583	1.13382e-33	143.25	127.86	143.25	1	92.3326	3.51126e-10	103.85	0.998171	27.3697	0.00190736	38.028	0.999872	38.9342	0.0005582	45.992					1	64.6226	3.30752e-06	71.513
P62979	Polyubiquitin-B;Ubiquitin;Polyubiquitin-C;Ubiquitin;Ubiquitin-40S ribosomal protein S27a;Ubiquitin;40S ribosomal protein S27a;Ubiquitin-60S ribosomal protein L40;Ubiquitin;60S ribosomal protein L40	UBB;UBC;RPS27A;UBA52	6;6;6;6	2.1776	2.3833	2.4006	2.5041	1.9191	1.9808	0.96346	1.1339	1.3141	1.3132	P0CG47;P0CG48;P62979;P62987	6;6;6;6	P0CG47;P62979;P62987	P62979	Polyubiquitin-B;Ubiquitin;Polyubiquitin-C;Ubiquitin;Ubiquitin-40S ribosomal protein S27a;Ubiquitin;40S ribosomal protein S27a;Ubiquitin-60S ribosomal protein L40;Ubiquitin;60S ribosomal protein L40	UBB;UBC;RPS27A;UBA52	sp|P0CG47|UBB_HUMAN Polyubiquitin-B OS=Homo sapiens OX=9606 GN=UBB PE=1 SV=1;sp|P0CG48|UBC_HUMAN Polyubiquitin-C OS=Homo sapiens OX=9606 GN=UBC PE=1 SV=3;sp|P62979|RS27A_HUMAN Ubiquitin-40S ribosomal protein S27a OS=Homo sapiens OX=9606 GN=RPS27A PE=1 SV=2	1	118.506	2.83212e-102	246.63	168.95	246.63	1	104.499	5.0859e-71	232.88	1	118.506	2.83212e-102	246.63	1	93.7854	6.23623e-71	232.88	1	104.982	4.40414e-87	245.08	1	100.432	9.59802e-86	241.63	1	105.5	1.72843e-85
Q5W0B1	RING finger protein 219	RNF219	502	2.1765	3.4633		3.8513	4.5897	4.4465	2.1941	4.192			Q5W0B1	502	Q5W0B1	Q5W0B1	RING finger protein 219	RNF219	sp|Q5W0B1|RN219_HUMAN RING finger protein 219 OS=Homo sapiens OX=9606 GN=RNF219 PE=1 SV=1	0.999965	44.5032	0.00778397	66.595	36.929	63.283					0.998534	28.3322	0.0415635	34.768	0.999911	40.5246	0.00778397	51.135	0.98637	18.5954	0.0719014	27.005	0.999887	39.4807	0.0308013	66.595	0.998179	27.388	0.0303834
Q92616	Translational activator GCN1	GCN1L1	1414	2.1709		1.9277	1.9373			0.7017				Q92616	1414	Q92616	Q92616	Translational activator GCN1	GCN1L1	sp|Q92616|GCN1_HUMAN eIF-2-alpha kinase activator GCN1 OS=Homo sapiens OX=9606 GN=GCN1 PE=1 SV=6	1	74.2568	4.28363e-25	97.253	89.719	97.253	0.999999	62.6522	1.94909e-18	85.062	1	70.6094	2.49141e-16	87.326									0.889134	12.0127	0.0125985	19.044
P51610	Host cell factor 1;HCF N-terminal chain 1;HCF N-terminal chain 2;HCF N-terminal chain 3;HCF N-terminal chain 4;HCF N-terminal chain 5;HCF N-terminal chain 6;HCF C-terminal chain 1;HCF C-terminal chain 2;HCF C-terminal chain 3;HCF C-terminal chain 4;HCF C-terminal chain 5;HCF C-terminal chain 6	HCFC1	836	2.1706	1.566	1.528	2.3805	0.87216				0.86089		P51610	836	P51610	P51610	Host cell factor 1;HCF N-terminal chain 1;HCF N-terminal chain 2;HCF N-terminal chain 3;HCF N-terminal chain 4;HCF N-terminal chain 5;HCF N-terminal chain 6;HCF C-terminal chain 1;HCF C-terminal chain 2;HCF C-terminal chain 3;HCF C-terminal chain 4;HCF C-terminal chain 5;HCF C-terminal chain 6	HCFC1	sp|P51610|HCFC1_HUMAN Host cell factor 1 OS=Homo sapiens OX=9606 GN=HCFC1 PE=1 SV=2	1	79.3824	4.02797e-21	123.68	98.809	79.382	1	100.267	4.02797e-21	100.27	1	79.3824	3.5072e-10	79.382	1	54.605	7.01477e-15	90.37
Q9UBZ4	DNA-(apurinic or apyrimidinic site) lyase 2	APEX2	338	2.1519	1.2206	1.2893	1.6526	1.3087	1.4034	1.2202	1.1815	1.1941	1.1443	Q9UBZ4	338	Q9UBZ4	Q9UBZ4	DNA-(apurinic or apyrimidinic site) lyase 2	APEX2	sp|Q9UBZ4|APEX2_HUMAN DNA-(apurinic or apyrimidinic site) lyase 2 OS=Homo sapiens OX=9606 GN=APEX2 PE=1 SV=1	1	84.2973	6.77485e-11	124.12	101.63	84.297	1	84.6583	6.77485e-11	112.44	1	89.2306	6.34679e-06	89.231	1	89.46	6.04934e-06	89.46	1	84.2973	1.27449e-05	84.297	1	104.795	1.31172e-09	104.79	1	84.2973	1.27449e-05
Q9UHD8	Septin-9	2023-09-09	490	2.15	2.2319	3.7511	1.8524	2.0195			3.5375			Q9UHD8	490	Q9UHD8	Q9UHD8	Septin-9	2023-09-09	sp|Q9UHD8|SEPT9_HUMAN Septin-9 OS=Homo sapiens OX=9606 GN=SEPT9 PE=1 SV=2	1	64.8033	0.000433457	111.28	41.889	64.803	1	111.278	0.000433457	111.28	1	94.2618	0.0210009	94.262	1	95.793	0.0182303	95.793									1	64.8033	0.0689003
Q9NUQ8	ATP-binding cassette sub-family F member 3	ABCF3	294	2.1492	2.56	2.5147	2.8569	2.2291	2.0285	1.9052	1.5581		1.233	Q9NUQ8	294	Q9NUQ8	Q9NUQ8	ATP-binding cassette sub-family F member 3	ABCF3	sp|Q9NUQ8|ABCF3_HUMAN ATP-binding cassette sub-family F member 3 OS=Homo sapiens OX=9606 GN=ABCF3 PE=1 SV=2	1	63.0908	2.50518e-77	160.47	150.23	111.58	0.999999	58.9988	2.50518e-77	160.47	0.999848	38.17	2.96183e-44	131.57	0.999989	49.4473	5.34174e-44	127.14	0.983235	17.6824	4.807e-09	65.779	0.999753	36.0807	9.70022e-27	99.711	1	63.0908	5.60378e-31
P11387	DNA topoisomerase 1	TOP1	347	2.1484	2.4477	3.4913	3.0505	2.8334		1.1686				P11387	347	P11387	P11387	DNA topoisomerase 1	TOP1	sp|P11387|TOP1_HUMAN DNA topoisomerase 1 OS=Homo sapiens OX=9606 GN=TOP1 PE=1 SV=2	1	22.365	0.000386182	64.534	63.738	22.365	1	64.5339	0.000386182	64.534	1	22.365	0.00321659	42.568	1	48.6251	0.0019521	48.625					1	38.5111	0.0235085	38.511
Q6ZNB6	NF-X1-type zinc finger protein NFXL1	NFXL1	210	1.2835	2.3162	2.2504		1.9023		0.92982	0.77302			Q6ZNB6	210	Q6ZNB6	Q6ZNB6	NF-X1-type zinc finger protein NFXL1	NFXL1	sp|Q6ZNB6|NFXL1_HUMAN NF-X1-type zinc finger protein NFXL1 OS=Homo sapiens OX=9606 GN=NFXL1 PE=1 SV=2	0.556111	0.978875	1.87459e-25	133.45	133.45	133.45	0.5	0	8.8985e-09	93.153					0.556111	0.978875	1.87459e-25	133.45					0.536182	0.629648	6.24004e-06	66.965	0.5	0	0.00187252
Q70Z53	Protein FRA10AC1	FRA10AC1	36		2.3113		1.7942							Q70Z53	36	Q70Z53	Q70Z53	Protein FRA10AC1	FRA10AC1	sp|Q70Z53|F10C1_HUMAN Protein FRA10AC1 OS=Homo sapiens OX=9606 GN=FRA10AC1 PE=1 SV=3	0.915226	10.3327	0.00339353	39.661	32.29	39.661					0.801846	6.07089	0.00447117	38.366
P19338	Nucleolin	NCL	646	2.1459	2.017	2.2138	1.412	2.1462						P19338	646	P19338	P19338	Nucleolin	NCL	sp|P19338|NUCL_HUMAN Nucleolin OS=Homo sapiens OX=9606 GN=NCL PE=1 SV=3	0.852149	7.60692	0.00790867	46.158	46.158	36.334	0.829842	6.88144	0.0139442	38.303	0.80963	6.28689	0.0732804	19.243	0.798139	5.97027	0.057922	22.641
Q9UJX3	Anaphase-promoting complex subunit 7	ANAPC7	264	2.3401	2.2916	2.2194	1.9366			1.7713	1.5869			Q9UJX3	264	Q9UJX3	Q9UJX3	Anaphase-promoting complex subunit 7	ANAPC7	sp|Q9UJX3|APC7_HUMAN Anaphase-promoting complex subunit 7 OS=Homo sapiens OX=9606 GN=ANAPC7 PE=1 SV=4	0.551069	0.890259	0.0095034	48.004	19.83	45.433	0.541119	0.71592	0.0095034	48.004	0.548824	0.850866	0.0240893	37.995									0.53422	0.59539	0.0240176	38.021	0.52907	0.505567	0.071677
P15924	Desmoplakin	DSP	1075	2.1439	1.3669	2.4365	1.4981	1.2752		1.0478		2.0729		P15924	1075	P15924	P15924	Desmoplakin	DSP	sp|P15924|DESP_HUMAN Desmoplakin OS=Homo sapiens OX=9606 GN=DSP PE=1 SV=3	1	84.8822	0.000119553	87.641	66.245	84.882	1	75.5823	0.000119553	87.641	1	84.8822	0.000147746	85.522	0.999996	53.5672	0.00344917	53.567					0.999916	40.7483	0.0741003	48.659
P30050	60S ribosomal protein L12	RPL12	54	2.1403	3.3691	3.1835								P30050	54	P30050	P30050	60S ribosomal protein L12	RPL12	sp|P30050|RL12_HUMAN 60S ribosomal protein L12 OS=Homo sapiens OX=9606 GN=RPL12 PE=1 SV=1	1	69.8117	0.00507095	81.548	55.811	69.812	1	50.8046	0.0292374	50.805
O14979	Heterogeneous nuclear ribonucleoprotein D-like	HNRNPDL	142		2.2773									O14979	142	O14979	O14979	Heterogeneous nuclear ribonucleoprotein D-like	HNRNPDL	sp|O14979|HNRDL_HUMAN Heterogeneous nuclear ribonucleoprotein D-like OS=Homo sapiens OX=9606 GN=HNRNPDL PE=1 SV=3	0.556783	0.990697	4.17655e-05	33.544	33.544	33.544
Q6ZNB6	NF-X1-type zinc finger protein NFXL1	NFXL1	604	2.1358	1.7461					0.4097				Q6ZNB6	604	Q6ZNB6	Q6ZNB6	NF-X1-type zinc finger protein NFXL1	NFXL1	sp|Q6ZNB6|NFXL1_HUMAN NF-X1-type zinc finger protein NFXL1 OS=Homo sapiens OX=9606 GN=NFXL1 PE=1 SV=2	1	20.4459	2.02716e-09	74.364	74.364	20.446																	1	43.1198	0.00327015	43.12
P11387	DNA topoisomerase 1	TOP1	575	2.1316	1.6881	1.6578	1.5899	2.4095	1.485	1.5848	1.7381			P11387	575	P11387	P11387	DNA topoisomerase 1	TOP1	sp|P11387|TOP1_HUMAN DNA topoisomerase 1 OS=Homo sapiens OX=9606 GN=TOP1 PE=1 SV=2	1	115.968	9.30342e-87	205.02	180.42	205.02	0.999999	59.1225	5.38384e-30	134.29	1	115.968	9.30342e-87	205.02	1	89.9117	1.44322e-38	141.83	0.831666	6.93777	0.0008381	37.09	1	84.7951	7.6973e-30	133.09	0.940608	11.9968	0.0499688
O00425	Insulin-like growth factor 2 mRNA-binding protein 3	IGF2BP3	23		2.2673	0.99495		1.5752		0.80231				O00425	23	O00425	O00425	Insulin-like growth factor 2 mRNA-binding protein 3	IGF2BP3	sp|O00425|IF2B3_HUMAN Insulin-like growth factor 2 mRNA-binding protein 3 OS=Homo sapiens OX=9606 GN=IGF2BP3 PE=1 SV=2	0.5	0	0.00286485	27.947	27.947	26.627	0.5	0	0.00286485	27.947					0.5	0	0.0139419	21.129					0.5	0	0.0043468	27.035
P11387	DNA topoisomerase 1	TOP1	252	2.129	1.3883	1.9285	2.2111	1.8914		1.0622				P11387	252	P11387	P11387	DNA topoisomerase 1	TOP1	sp|P11387|TOP1_HUMAN DNA topoisomerase 1 OS=Homo sapiens OX=9606 GN=TOP1 PE=1 SV=2	1	101.231	9.65497e-22	127.36	127.36	127.36	1	95.9871	2.63177e-15	115.83	1	101.231	9.65497e-22	127.36	1	86.6987	1.75752e-08	104.17					1	82.0412	1.58123e-07	100.45
Q9NQE9	Histidine triad nucleotide-binding protein 3	HINT3	115	2.1251	2.3987	2.697	2.0442	1.7753		2.3926				Q9NQE9	115	Q9NQE9	Q9NQE9	Histidine triad nucleotide-binding protein 3	HINT3	sp|Q9NQE9|HINT3_HUMAN Histidine triad nucleotide-binding protein 3 OS=Homo sapiens OX=9606 GN=HINT3 PE=1 SV=1	1	92.7191	3.67727e-16	106.73	94.071	106.73	0.999965	44.5905	0.000913647	56.719	1	92.7191	3.67727e-16	106.73	0.999999	59.7967	2.82092e-06	81.807					0.999988	49.2245	5.39559e-07	61.181
O75534	Cold shock domain-containing protein E1	CSDE1	86	2.1246			2.2747	1.6233		0.91366		0.75441		O75534	86	O75534	O75534	Cold shock domain-containing protein E1	CSDE1	sp|O75534|CSDE1_HUMAN Cold shock domain-containing protein E1 OS=Homo sapiens OX=9606 GN=CSDE1 PE=1 SV=2	0.99999	50.6889	0.00099366	96.604	96.604	96.604					0.770892	5.47034	0.0313014	27.526	0.619088	2.14573	0.0228132	29.809					0.813864	6.47446	0.0214969	30.729
Q8N3U4	Cohesin subunit SA-2;Cohesin subunit SA-1	STAG2;STAG1	270;273	2.1236	1.989	2.1523	2.202	1.6958	2.1764	1.4826		1.1953	1.2261	Q8N3U4;Q8WVM7	270;273	Q8N3U4	Q8N3U4	Cohesin subunit SA-2;Cohesin subunit SA-1	STAG2;STAG1	sp|Q8N3U4|STAG2_HUMAN Cohesin subunit SA-2 OS=Homo sapiens OX=9606 GN=STAG2 PE=1 SV=3;sp|Q8WVM7|STAG1_HUMAN Cohesin subunit SA-1 OS=Homo sapiens OX=9606 GN=STAG1 PE=1 SV=3	1	47.6573	0.00127274	102.72	45.16	47.657	1	88.9423	0.00384513	88.942	1	88.9423	0.00232912	88.942	1	63.4796	0.00255352	71.342	1	47.6573	0.0103153	47.657	1	89.1423	0.00127274	89.142	1	89.5498	0.00576458
Q16531	DNA damage-binding protein 1	DDB1	200	2.1182	2.1292	2.5721	2.5984		2.2539	1.0587				Q16531	200	Q16531	Q16531	DNA damage-binding protein 1	DDB1	sp|Q16531|DDB1_HUMAN DNA damage-binding protein 1 OS=Homo sapiens OX=9606 GN=DDB1 PE=1 SV=1	0.897401	9.43238	0.00390995	56.404	44.168	43.308	0.797867	6.03032	0.055449	24.089	0.81257	6.39408	0.00390995	56.404					0.839894	7.20192	0.00907345	42.743	0.559476	1.04373	0.0161958	36.585	0.498029	0	0.0220622
P51523	Zinc finger protein 84	ZNF84	387	2.1062	1.4621		1.3775	1.3459		0.91975	1.3477			P51523	387	P51523	P51523	Zinc finger protein 84	ZNF84	sp|P51523|ZNF84_HUMAN Zinc finger protein 84 OS=Homo sapiens OX=9606 GN=ZNF84 PE=1 SV=2	1	23.226	0.000343653	86.898	74.282	23.226					1	86.8981	0.000343653	86.898	1	86.8981	0.000343653	86.898					1	76.2278	0.000769912	76.228	1	23.226	0.0474637
Q14204	Cytoplasmic dynein 1 heavy chain 1	DYNC1H1	4442	1.9673	2.2245		1.5266							Q14204	4442	Q14204	Q14204	Cytoplasmic dynein 1 heavy chain 1	DYNC1H1	sp|Q14204|DYHC1_HUMAN Cytoplasmic dynein 1 heavy chain 1 OS=Homo sapiens OX=9606 GN=DYNC1H1 PE=1 SV=5	0.568189	1.19199	1.04873e-07	101.3	95.272	101.3					0.568189	1.19199	1.04873e-07	101.3
O75151	Lysine-specific demethylase PHF2	PHF2	427	2.1042	1.6903	1.6759	1.9138	2.2045	2.144	0.93978	1.1018			O75151	427	O75151	O75151	Lysine-specific demethylase PHF2	PHF2	sp|O75151|PHF2_HUMAN Lysine-specific demethylase PHF2 OS=Homo sapiens OX=9606 GN=PHF2 PE=1 SV=4	0.999899	39.9647	1.59815e-27	117.74	117.74	87.772	0.995198	23.1652	4.32007e-22	109.89	0.999438	32.4996	6.97892e-16	89.028	0.998597	28.5228	7.68959e-22	105.56	0.765954	5.14902	8.40681e-06	52.541	0.994443	22.527	1.09989e-15	86.727	0.992364	21.1382	6.82171e-22
Q02241	Kinesin-like protein KIF23	KIF23	517	2.0996						1.0165		1.1479	0.94192	Q02241	517	Q02241	Q02241	Kinesin-like protein KIF23	KIF23	sp|Q02241|KIF23_HUMAN Kinesin-like protein KIF23 OS=Homo sapiens OX=9606 GN=KIF23 PE=1 SV=3	0.999273	31.3802	2.04942e-05	126.56	86.602	126.56																	0.991361	20.5975	0.0242849	36.025
O60869	Endothelial differentiation-related factor 1	EDF1	79	2.0904				1.5334		0.8803				O60869	79	O60869	O60869	Endothelial differentiation-related factor 1	EDF1	sp|O60869|EDF1_HUMAN Endothelial differentiation-related factor 1 OS=Homo sapiens OX=9606 GN=EDF1 PE=1 SV=1	1	76.3572	4.082e-05	81.431	54.89	76.357									1	76.3572	8.35793e-05	76.357					1	58.0983	0.000824714	58.098
P15559	NAD(P)H dehydrogenase [quinone] 1	NQO1	209	2.089						1.4275		0.74863	0.82854	P15559	209	P15559	P15559	NAD(P)H dehydrogenase [quinone] 1	NQO1	sp|P15559|NQO1_HUMAN NAD(P)H dehydrogenase [quinone] 1 OS=Homo sapiens OX=9606 GN=NQO1 PE=1 SV=1	0.956123	13.3828	0.0135681	113.71	44.108	58.246									0.5	0	0.0230561	45.161					0.858757	7.83902	0.0448673	49.715
Q7KZF4	Staphylococcal nuclease domain-containing protein 1	SND1	341	2.0683	2.206	2.6267	2.2862	1.8187	1.9335	1.0295	0.81794			Q7KZF4	341	Q7KZF4	Q7KZF4	Staphylococcal nuclease domain-containing protein 1	SND1	sp|Q7KZF4|SND1_HUMAN Staphylococcal nuclease domain-containing protein 1 OS=Homo sapiens OX=9606 GN=SND1 PE=1 SV=1	0.679869	3.27097	3.74827e-07	94.728	86.817	70.373	0.538586	0.671647	0.000171601	63.709	0.648767	2.66493	3.74827e-07	94.728	0.679869	3.27097	7.5246e-05	70.373	0.642334	2.54283	4.36831e-05	91.855	0.609855	1.94001	0.000181313	63.037	0.609855	1.94001	0.000181313
Q9UFF9	CCR4-NOT transcription complex subunit 8	CNOT8	269	2.0802	0.99196	1.9259	0.7954	1.0335	2.394	1.0741	1.3826	1.8192	1.7947	Q9UFF9	269	Q9UFF9	Q9UFF9	CCR4-NOT transcription complex subunit 8	CNOT8	sp|Q9UFF9|CNOT8_HUMAN CCR4-NOT transcription complex subunit 8 OS=Homo sapiens OX=9606 GN=CNOT8 PE=1 SV=1	1	81.5915	6.90571e-53	150.83	138.53	135.04	0.999998	56.7022	1.93865e-35	131.65	1	67.3551	1.95043e-44	142.31	1	72.2941	2.0694e-44	147.25	0.999682	34.9775	1.94896e-07	77.287	1	67.0527	6.90571e-53	150.83	0.999973	45.6349	4.83892e-16
Q9Y5A9	YTH domain-containing family protein 2	YTHDF2	391	2.0767				1.5802		0.70853				Q9Y5A9	391	Q9Y5A9	Q9Y5A9	YTH domain-containing family protein 2	YTHDF2	sp|Q9Y5A9|YTHD2_HUMAN YTH domain-containing family protein 2 OS=Homo sapiens OX=9606 GN=YTHDF2 PE=1 SV=2	1	20.1046	1.26127e-20	73.266	71.511	20.105									1	20.1046	0.00354403	20.105					1	9.31181	0.0621803	9.3118
P26038	Moesin	MSN	209	1.7299	2.1858	1.1491	1.7526	1.441						P26038	209	P26038	P26038	Moesin	MSN	sp|P26038|MOES_HUMAN Moesin OS=Homo sapiens OX=9606 GN=MSN PE=1 SV=3	0.5	0	1.42086e-39	156.8	156.8	100.55	0.5	0	2.2985e-26	136.33	0.5	0	4.6616e-10	100.55	0.5	0	1.42086e-39	156.8					0.333333	0	0.0713443	31.462
Q96BN8	Ubiquitin thioesterase otulin	OTULIN	66	2.0757	0.85621	1.3786	1.0145	0.97522	1.0368	1.0306	1.2637			Q96BN8	66	Q96BN8	Q96BN8	Ubiquitin thioesterase otulin	OTULIN	sp|Q96BN8|OTUL_HUMAN Ubiquitin thioesterase otulin OS=Homo sapiens OX=9606 GN=OTULIN PE=1 SV=3	1	51.0919	6.87233e-11	104.45	99.125	51.092	1	51.0919	0.00528586	51.092	1	78.9342	6.87233e-11	104.45	1	84.2126	0.00226937	84.213	1	51.0919	0.00528586	51.092	1	66.4345	0.00405064	66.435	1	52.7897	0.00490147
Q00610	Clathrin heavy chain 2;Clathrin heavy chain 1	CLTCL1;CLTC	851;851		2.1756		1.9055	2.1314						P53675;Q00610	851;851	P53675;Q00610	Q00610	Clathrin heavy chain 2;Clathrin heavy chain 1	CLTCL1;CLTC	sp|P53675|CLH2_HUMAN Clathrin heavy chain 2 OS=Homo sapiens OX=9606 GN=CLTCL1 PE=1 SV=2;sp|Q00610|CLH1_HUMAN Clathrin heavy chain 1 OS=Homo sapiens OX=9606 GN=CLTC PE=1 SV=5	1	36.6377	0.00176641	39.685	30.027	36.638					1	36.6377	0.00340785	36.638	1	39.6846	0.00176641	39.685
P11387	DNA topoisomerase 1	TOP1	388	2.0706	1.8228	1.5321	1.6364			1.8166	1.6135		0.97976	P11387	388	P11387	P11387	DNA topoisomerase 1	TOP1	sp|P11387|TOP1_HUMAN DNA topoisomerase 1 OS=Homo sapiens OX=9606 GN=TOP1 PE=1 SV=2	0.997249	25.5938	9.92502e-11	105.46	86.402	99.481	0.975461	15.9936	9.92502e-11	105.46	0.968268	14.845	1.13553e-08	104.17									0.997135	25.4169	1.04019e-07	98.439	0.568228	1.19268	9.95283e-05
P40763	Signal transducer and activator of transcription 3	STAT3	294	2.0663	0.95858	1.2177	1.9081			1.6771		0.89745	0.86111	P40763	294	P40763	P40763	Signal transducer and activator of transcription 3	STAT3	sp|P40763|STAT3_HUMAN Signal transducer and activator of transcription 3 OS=Homo sapiens OX=9606 GN=STAT3 PE=1 SV=2	1	76.3005	5.2343e-08	83.37	83.37	76.301	1	74.9528	3.23099e-05	74.953	1	76.3005	5.2343e-08	76.301									1	39.8487	0.000516642	39.849
O15392	Baculoviral IAP repeat-containing protein 5	BIRC5	91	2.5874	2.1687			2.9126	2.0221	2.3753				O15392	91	O15392	O15392	Baculoviral IAP repeat-containing protein 5	BIRC5	sp|O15392|BIRC5_HUMAN Baculoviral IAP repeat-containing protein 5 OS=Homo sapiens OX=9606 GN=BIRC5 PE=1 SV=3	0.53116	0.542002	0.0105094	45.915	42.965	28.206									0.5	0	0.0365643	32.933	0.526757	0.465258	0.050678	28.327	0.529096	0.506027	0.0105094	45.915
P15924	Desmoplakin	DSP	154	2.0591	1.9346	1.5439		1.5145		1.3144		1.196		P15924	154	P15924	P15924	Desmoplakin	DSP	sp|P15924|DESP_HUMAN Desmoplakin OS=Homo sapiens OX=9606 GN=DSP PE=1 SV=3	1	56.4044	0.00257773	60.434	37.058	56.404	1	60.4336	0.00257773	60.434					1	57.3483	0.00296929	57.348					1	49.5005	0.00427851	49.5
P24928	DNA-directed RNA polymerase II subunit RPB1	POLR2A	914	2.0511	1.9512	1.0149	2.6592	2.442		0.76386	0.79087	0.8484	1.1193	P24928	914	P24928	P24928	DNA-directed RNA polymerase II subunit RPB1	POLR2A	sp|P24928|RPB1_HUMAN DNA-directed RNA polymerase II subunit RPB1 OS=Homo sapiens OX=9606 GN=POLR2A PE=1 SV=2	0.942466	13.6902	5.776e-158	223.85	223.85	171.52	0.461721	0	1.04046e-19	86.006	0.851	5.15822	5.776e-158	223.85	0.804776	6.25241	6.72565e-101	175.48					0.793055	6.92056	6.55081e-110	183.39	0.723683	6.71562	3.89124e-20
P17096	High mobility group protein HMG-I/HMG-Y	HMGA1	15	2.0497	1.6151	2.002	2.0685		0.96491	1.0551	1.0244	0.92564	0.75883	P17096	15	P17096	P17096	High mobility group protein HMG-I/HMG-Y	HMGA1	sp|P17096|HMGA1_HUMAN High mobility group protein HMG-I/HMG-Y OS=Homo sapiens OX=9606 GN=HMGA1 PE=1 SV=3	0.999958	43.74	4.86796e-16	160.75	135.81	160.75	0.500005	0	3.70244e-06	69.594	0.50033	0	0.0028666	33.697					0.999958	43.74	4.86796e-16	160.75	0.500903	0	0.00399701	30.536	0.500984	0	0.0183383
P17096	High mobility group protein HMG-I/HMG-Y	HMGA1	18	2.0497		1.9437	2.0685	1.7648		1.0551	1.1897	0.69173	0.59284	P17096	18	P17096	P17096	High mobility group protein HMG-I/HMG-Y	HMGA1	sp|P17096|HMGA1_HUMAN High mobility group protein HMG-I/HMG-Y OS=Homo sapiens OX=9606 GN=HMGA1 PE=1 SV=3	0.935601	12.091	3.70244e-06	105.39	74.653	67.846	0.522395	0.389301	3.70244e-06	69.594	0.50033	0	0.0028666	33.697	0.585936	1.50634	0.000157859	49.559					0.500903	0	0.00399701	30.536	0.598942	1.74178	0.0183383
O75911	Short-chain dehydrogenase/reductase 3	DHRS3	142	2.0469	1.1704	0.77552	1.0115	1.25	1.3633	0.69098	0.58837	0.47716	0.47632	O75911	142	O75911	O75911	Short-chain dehydrogenase/reductase 3	DHRS3	sp|O75911|DHRS3_HUMAN Short-chain dehydrogenase/reductase 3 OS=Homo sapiens OX=9606 GN=DHRS3 PE=1 SV=2	1	107.853	2.20574e-129	223.41	223.41	223.41	1	73.861	2.6173e-87	170.16	1	107.853	2.20574e-129	223.41	1	95.9563	5.6089e-104	193.47	0.999825	37.5786	7.89811e-13	75.226	1	96.037	7.15671e-95	184.26	0.999988	49.3557	1.35726e-29
P15924	Desmoplakin	DSP	900	2.0421	1.5525	1.7375	1.6001	1.0759		1.19	1.1907			P15924	900	P15924	P15924	Desmoplakin	DSP	sp|P15924|DESP_HUMAN Desmoplakin OS=Homo sapiens OX=9606 GN=DSP PE=1 SV=3	0.999999	58.7194	1.16236e-09	106.01	98.463	106.01	0.999999	58.7194	1.16236e-09	106.01	0.99981	37.2027	2.47829e-05	79.771	0.999933	41.7431	2.47829e-05	79.771					0.998325	27.7523	0.00171836	57.836	0.996238	24.2296	0.008716
P41208	Centrin-2	CETN2	51		2.1407									P41208	51	P41208	P41208	Centrin-2	CETN2	sp|P41208|CETN2_HUMAN Centrin-2 OS=Homo sapiens OX=9606 GN=CETN2 PE=1 SV=1	0.561349	1.07113	0.00073677	37.552	37.552	37.552
P20042	Eukaryotic translation initiation factor 2 subunit 2	EIF2S2	324	2.04	2.4363	1.5917	2.7644		2.0894	1.6148	1.837			P20042	324	P20042	P20042	Eukaryotic translation initiation factor 2 subunit 2	EIF2S2	sp|P20042|IF2B_HUMAN Eukaryotic translation initiation factor 2 subunit 2 OS=Homo sapiens OX=9606 GN=EIF2S2 PE=1 SV=2	1	32.159	0.00485214	70.056	60.469	32.159	1	60.5185	0.01159	60.518	1	39.2927	0.00754098	39.293					1	32.159	0.0157436	32.159	1	28.7643	0.0681724	28.764	1	27.6636	0.0238715
P46013	Antigen KI-67	MKI67	2410	2.0364	1.749	1.6417	1.7322	1.046	0.92188	1.786	1.4346			P46013	2410	P46013	P46013	Antigen KI-67	MKI67	sp|P46013|KI67_HUMAN Proliferation marker protein Ki-67 OS=Homo sapiens OX=9606 GN=MKI67 PE=1 SV=2	0.999999	59.3523	8.28502e-37	136.64	136.64	136.64	0.999968	44.967	9.12643e-13	80.67	0.999955	43.5078	1.56996e-13	82.593	0.999999	59.3523	8.28502e-37	136.64	0.999999	58.4359	9.28125e-22	113.26	0.999992	51.1137	2.21303e-28	121.47	0.999985	48.1313	1.1104e-22
P13010	X-ray repair cross-complementing protein 5	XRCC5	332	2.0363	0.97134	0.73689	1.175	0.88918		1.0032	1.7449			P13010	332	P13010	P13010	X-ray repair cross-complementing protein 5	XRCC5	sp|P13010|XRCC5_HUMAN X-ray repair cross-complementing protein 5 OS=Homo sapiens OX=9606 GN=XRCC5 PE=1 SV=3	0.997074	25.325	4.88284e-05	112.94	93.154	112.94	0.989118	19.5855	0.0257405	81.548	0.997074	25.325	4.88284e-05	112.94	0.924034	10.8507	0.0019521	100.15					0.882854	8.77162	0.000140403	107.29	0.980231	16.9535	0.0041162
P27694	Replication protein A 70 kDa DNA-binding subunit;Replication protein A 70 kDa DNA-binding subunit, N-terminally processed	RPA1	163	2.0339	2.4061	2.5334	2.1977	2.2355	1.9835	0.85507	0.86417	1.0741	1.256	P27694	163	P27694	P27694	Replication protein A 70 kDa DNA-binding subunit;Replication protein A 70 kDa DNA-binding subunit, N-terminally processed	RPA1	sp|P27694|RFA1_HUMAN Replication protein A 70 kDa DNA-binding subunit OS=Homo sapiens OX=9606 GN=RPA1 PE=1 SV=2	0.999914	40.6697	0.000184386	99.802	90.844	85.533	0.999341	31.8095	0.00062912	99.802	0.999914	40.6697	0.00036963	87.308	0.996556	24.6147	0.000184386	95.523	0.986224	18.5486	0.00403656	76.827	0.999763	36.2603	0.000643621	87.308	0.99535	23.3051	0.00434268
P62280	40S ribosomal protein S11	RPS11	59	2.0334	1.4233	1.4873	2.2974	1.0867		0.93105	3.0293			P62280	59	P62280	P62280	40S ribosomal protein S11	RPS11	sp|P62280|RS11_HUMAN 40S ribosomal protein S11 OS=Homo sapiens OX=9606 GN=RPS11 PE=1 SV=3	1	22.7814	3.17791e-11	127.3	96.227	22.781	1	36.4466	0.0283369	36.447	1	42.0835	9.64919e-07	113.62	1	58.1721	3.17791e-11	127.3					1	47.4291	0.000830048	81.972	1	22.7814	0.0734055
Q7KZF4	Staphylococcal nuclease domain-containing protein 1	SND1	515	2.0164	2.0236	2.1979	2.3165	1.6363	1.754	0.87733	0.80991			Q7KZF4	515	Q7KZF4	Q7KZF4	Staphylococcal nuclease domain-containing protein 1	SND1	sp|Q7KZF4|SND1_HUMAN Staphylococcal nuclease domain-containing protein 1 OS=Homo sapiens OX=9606 GN=SND1 PE=1 SV=1	1	54.066	0.000956415	114.93	71.906	54.066	1	72.6431	0.000956415	72.643	1	71.3491	0.00109376	71.349	1	114.932	0.00243282	114.93	1	54.066	0.00338586	54.066	1	63.5651	0.00169387	66.962	1	58.2462	0.00285534
Q8N2H4	Protein SYS1 homolog	SYS1	153	2.0027	1.5431			1.3544	1.6465	1.031	0.75597		0.96423	Q8N2H4	153	Q8N2H4	Q8N2H4	Protein SYS1 homolog	SYS1	sp|Q8N2H4|SYS1_HUMAN Protein SYS1 homolog OS=Homo sapiens OX=9606 GN=SYS1 PE=1 SV=1	1	50.2923	2.28851e-05	94.66	75.565	50.292					1	62.8229	0.0259418	62.823	1	64.6536	0.00437185	64.654	1	50.2923	0.0115294	50.292	1	77.6625	0.00853863	77.662	1	68.8931	0.0025999
Q8N3C0	Activating signal cointegrator 1 complex subunit 3	ASCC3	2097	2.0017	2.3211	2.0942	2.2683	2.0523				1.2226		Q8N3C0	2097	Q8N3C0	Q8N3C0	Activating signal cointegrator 1 complex subunit 3	ASCC3	sp|Q8N3C0|ASCC3_HUMAN Activating signal cointegrator 1 complex subunit 3 OS=Homo sapiens OX=9606 GN=ASCC3 PE=1 SV=3	1	91.8577	6.10058e-07	91.858	81.4	91.858	0.5	0	0.051757	16.123	1	91.8577	5.01263e-05	91.858	0.5	0	0.0547248	15.766
Q8N3C0	Activating signal cointegrator 1 complex subunit 3	ASCC3	2095	2.0017	2.3211	1.8544	2.0266	1.959		1.2164				Q8N3C0	2095	Q8N3C0	Q8N3C0	Activating signal cointegrator 1 complex subunit 3	ASCC3	sp|Q8N3C0|ASCC3_HUMAN Activating signal cointegrator 1 complex subunit 3 OS=Homo sapiens OX=9606 GN=ASCC3 PE=1 SV=3	0.883867	8.81429	1.68455e-19	122.31	122.31	98.796	0.863586	8.01448	1.68455e-19	122.31	0.856871	7.77188	3.49118e-12	104.44	0.883867	8.81429	1.06225e-10	98.796					0.812103	6.3569	0.000201342	46.543
O15392	Baculoviral IAP repeat-containing protein 5	BIRC5	90	1.9959		1.5992	1.2943	1.2161		1.9392	1.368			O15392	90	O15392	O15392	Baculoviral IAP repeat-containing protein 5	BIRC5	sp|O15392|BIRC5_HUMAN Baculoviral IAP repeat-containing protein 5 OS=Homo sapiens OX=9606 GN=BIRC5 PE=1 SV=3	0.823106	6.67743	0.0105094	45.915	42.965	34.96	0.807512	6.22746	0.0336921	33.968	0.819156	6.56063	0.0144326	42.083	0.823106	6.67743	0.0309391	34.96					0.5	0	0.0105094	45.915	0.791923	5.80459	0.0737393
O75534	Cold shock domain-containing protein E1	CSDE1	364	1.9912	2.8432	2.2406	3.1995	2.414		0.98729	1.0508			O75534	364	O75534	O75534	Cold shock domain-containing protein E1	CSDE1	sp|O75534|CSDE1_HUMAN Cold shock domain-containing protein E1 OS=Homo sapiens OX=9606 GN=CSDE1 PE=1 SV=2	1	39.7304	0.00159008	64.55	64.55	39.73	1	61.9324	0.00193931	61.932	1	52.5549	0.00281201	52.555	1	49.4231	0.00338848	49.423					1	64.1212	0.00164734	64.121	1	39.7304	0.00680586
Q8NC51	Plasminogen activator inhibitor 1 RNA-binding protein	SERBP1	103	2.0468	2.0967	1.8641	2.2972	1.3413	1.7386	1.0309	0.64214	0.96326		Q8NC51	103	Q8NC51	Q8NC51	Plasminogen activator inhibitor 1 RNA-binding protein	SERBP1	sp|Q8NC51|PAIRB_HUMAN Plasminogen activator inhibitor 1 RNA-binding protein OS=Homo sapiens OX=9606 GN=SERBP1 PE=1 SV=2	0.631215	2.33405	6.23513e-07	114.28	102.92	114.28	0.631215	2.33405	6.23513e-07	114.28	0.549076	0.855284	0.00200526	57.019	0.611724	1.97416	0.00188048	72.23	0.560822	1.06184	0.00121846	65.5	0.57519	1.31616	0.00043427	87.476	0.5	0	0.0212576
Q9P1Y6	PHD and RING finger domain-containing protein 1	PHRF1	413	1.9855	2.4707	2.0326	1.7298	2.4212		0.66236				Q9P1Y6	413	Q9P1Y6	Q9P1Y6	PHD and RING finger domain-containing protein 1	PHRF1	sp|Q9P1Y6|PHRF1_HUMAN PHD and RING finger domain-containing protein 1 OS=Homo sapiens OX=9606 GN=PHRF1 PE=1 SV=3	1	48.077	3.80973e-29	125.31	125.31	48.077	1	50.8273	1.97493e-19	103.02	1	48.077	4.80439e-05	48.867	1	125.311	3.80973e-29	125.31					1	43.8882	8.29647e-06	56.485
Q8N3C0	Activating signal cointegrator 1 complex subunit 3	ASCC3	213	1.9818	2.6199	3.3069	3.7833	1.6529	1.8825	0.8856	1.0562	1.7105		Q8N3C0	213	Q8N3C0	Q8N3C0	Activating signal cointegrator 1 complex subunit 3	ASCC3	sp|Q8N3C0|ASCC3_HUMAN Activating signal cointegrator 1 complex subunit 3 OS=Homo sapiens OX=9606 GN=ASCC3 PE=1 SV=3	0.999854	38.3445	6.79424e-54	162.09	162.09	144.33	0.99959	33.8704	6.79424e-54	162.09	0.996817	24.9575	3.3872e-22	120.71	0.998971	29.8727	5.29911e-38	137.73	0.970007	15.0976	8.91011e-17	109.65	0.999794	36.8501	1.25558e-22	124.2	0.970723	15.2057	1.75879e-13
P20337	Ras-related protein Rab-3B	RAB3B	202	1.9795	1.8355	1.6479	1.8753	2.1902	3.478	2.3208	1.8319	1.2899	1.2305	P20337	202	P20337	P20337	Ras-related protein Rab-3B	RAB3B	sp|P20337|RAB3B_HUMAN Ras-related protein Rab-3B OS=Homo sapiens OX=9606 GN=RAB3B PE=1 SV=2	1	100.966	2.83926e-59	170.89	170.89	100.97	1	170.888	4.01471e-59	170.89	1	88.5736	4.98982e-23	125.18	1	97.7129	7.82758e-13	97.713	1	65.9238	9.76351e-05	65.924	1	107.971	3.44543e-16	107.97	1	100.966	4.14524e-13
Q9P2E9	Ribosome-binding protein 1	RRBP1	779	1.9783	1.7585	2.2875			3.8478	1.5949				Q9P2E9	779	Q9P2E9	Q9P2E9	Ribosome-binding protein 1	RRBP1	sp|Q9P2E9|RRBP1_HUMAN Ribosome-binding protein 1 OS=Homo sapiens OX=9606 GN=RRBP1 PE=1 SV=5	1	44.3175	0.000430611	82.749	69.741	44.318	1	71.3491	0.00109376	71.349	1	63.8162	0.00782447	63.816					1	44.3175	0.00649524	44.318	1	61.6499	0.0024205	61.65
Q12981	Vesicle transport protein SEC20	BNIP1	178	1.9761		1.2137		1.2663		0.89145	0.89113	1.5027	1.5262	Q12981	178	Q12981	Q12981	Vesicle transport protein SEC20	BNIP1	sp|Q12981|SEC20_HUMAN Vesicle transport protein SEC20 OS=Homo sapiens OX=9606 GN=BNIP1 PE=1 SV=3	1	119.544	4.043e-49	151.23	142.63	119.54	1	97.0578	2.38238e-13	97.058					1	48.8475	6.7688e-39	145.05					1	130.849	1.20242e-29	130.85	1	119.544	1.87031e-22
Q9UIG0	Tyrosine-protein kinase BAZ1B	BAZ1B	297	1.974	1.9619	1.9689	2.0846	2.6179		0.79917			0.6829	Q9UIG0	297	Q9UIG0	Q9UIG0	Tyrosine-protein kinase BAZ1B	BAZ1B	sp|Q9UIG0|BAZ1B_HUMAN Tyrosine-protein kinase BAZ1B OS=Homo sapiens OX=9606 GN=BAZ1B PE=1 SV=2	0.999937	41.9728	3.11021e-22	121.74	121.74	113.53	0.999937	41.9728	3.31385e-17	113.53	0.999866	38.7177	5.51511e-11	85.808	0.999755	36.1035	3.11021e-22	121.74					0.999542	33.388	3.32384e-13	100.35
P46783	40S ribosomal protein S10	RPS10	138	1.97	4.4161	1.875	2.1005	1.5989	1.7122	0.86552	0.82794	0.91707	0.90989	P46783	138	P46783	P46783	40S ribosomal protein S10	RPS10	sp|P46783|RS10_HUMAN 40S ribosomal protein S10 OS=Homo sapiens OX=9606 GN=RPS10 PE=1 SV=1	1	86.5572	1.19882e-112	202.41	188.7	86.557	1	63.7264	8.04917e-86	170.28	1	57.1466	9.14604e-76	162.43	1	74.579	1.19882e-112	202.41	1	86.5572	1.13985e-102	195.71	1	24.1534	5.91398e-76	164.94	1	24.8957	3.01287e-93
A0A1W2PQS6			138	1.97		1.875	2.1005	1.5989	1.7122	0.86552	0.82794	0.91142	0.89534	A0A1W2PQS6	138	A0A1W2PQS6	A0A1W2PQS6			tr|A0A1W2PQS6|A0A1W2PQS6_HUMAN RPS10-NUDT3 readthrough OS=Homo sapiens OX=9606 GN=RPS10-NUDT3 PE=4 SV=1	0.86041	7.89853	0.000198493	104.2	80.046	83.998	0.5	0	0.00261207	79.906	0.5	0	0.00686874	68.224	0.5	0	0.00107545	92.439	0.5	0	0.000198493	104.2	0.5	0	0.019477	49.418	0.86041	7.89853	0.00180079
P12270	Nucleoprotein TPR	TPR	477	1.9679	1.3501	2.7382	1.7379			1.2028	1.6947	1.103	0.84691	P12270	477	P12270	P12270	Nucleoprotein TPR	TPR	sp|P12270|TPR_HUMAN Nucleoprotein TPR OS=Homo sapiens OX=9606 GN=TPR PE=1 SV=3	0.998315	27.7254	6.78334e-18	128.9	128.9	108.14	0.942276	12.1282	0.000794419	66.893	0.970934	15.2381	2.32129e-09	96.666									0.961594	13.9859	9.03299e-13	111.22	0.850501	7.55037	5.61479e-05
O75475	PC4 and SFRS1-interacting protein	PSIP1	143	1.9673										O75475	143	O75475	O75475	PC4 and SFRS1-interacting protein	PSIP1	sp|O75475|PSIP1_HUMAN PC4 and SFRS1-interacting protein OS=Homo sapiens OX=9606 GN=PSIP1 PE=1 SV=1	1	41.6892	0.00611522	41.689	30.784	41.689
P33981	Dual specificity protein kinase TTK	TTK	830	1.9614	1.0204	0.87985	0.99257			0.93448	0.95286			P33981	830	P33981	P33981	Dual specificity protein kinase TTK	TTK	sp|P33981|TTK_HUMAN Dual specificity protein kinase TTK OS=Homo sapiens OX=9606 GN=TTK PE=1 SV=2	0.962437	14.0861	2.44356e-14	103.85	103.85	15.241	0.618691	2.10196	3.00027e-13	95.094	0.624745	2.21377	2.44356e-14	103.85									0.962437	14.0861	1.16732e-13	100.92	0.527952	0.48609	1.59504e-05
P33981	Dual specificity protein kinase TTK	TTK	827	1.9614				0.68848						P33981	827	P33981	P33981	Dual specificity protein kinase TTK	TTK	sp|P33981|TTK_HUMAN Dual specificity protein kinase TTK OS=Homo sapiens OX=9606 GN=TTK PE=1 SV=2	0.991517	20.6773	2.07241e-23	125.51	125.51	125.51									0.991517	20.6773	2.07241e-23	125.51
O60264	SWI/SNF-related matrix-associated actin-dependent regulator of chromatin subfamily A member 5	SMARCA5	836	1.9601	1.649	2.2607	2.4199	2.3972	2.3933	1.5611	1.2164			O60264	836	O60264	O60264	SWI/SNF-related matrix-associated actin-dependent regulator of chromatin subfamily A member 5	SMARCA5	sp|O60264|SMCA5_HUMAN SWI/SNF-related matrix-associated actin-dependent regulator of chromatin subfamily A member 5 OS=Homo sapiens OX=9606 GN=SMARCA5 PE=1 SV=1	1	172.087	1.42677e-78	227.94	227.94	185.18	1	158.297	3.98844e-30	168.3	1	172.087	1.22326e-34	185.18	1	162.723	1.66274e-36	175.91	1	103.704	1.33721e-09	110.91	1	148.48	6.11749e-19	157.38	1	107.636	8.86074e-10
Q6NZI2	Polymerase I and transcript release factor	PTRF	173	1.9588	0.86471	1.0897	1.1029	1.2315	0.82846	1.329	1.1426			Q6NZI2	173	Q6NZI2	Q6NZI2	Polymerase I and transcript release factor	PTRF	sp|Q6NZI2|CAVN1_HUMAN Caveolae-associated protein 1 OS=Homo sapiens OX=9606 GN=CAVIN1 PE=1 SV=1	1	137	5.79349e-16	159.09	121.9	159.09	1	119.415	2.11952e-11	134.57	1	123.04	7.43399e-12	142.83	1	105.011	2.61462e-09	120.55	1	78.0267	0.00010444	97.813	1	137	5.79349e-16	159.09	1	111.459	1.1459e-11
P49790	Nuclear pore complex protein Nup153	NUP153	1066	1.9555	2.0803	3.3536	2.6444	1.4289	1.2958	2.7866	4.7818	0.97707	0.90886	P49790	1066	P49790	P49790	Nuclear pore complex protein Nup153	NUP153	sp|P49790|NU153_HUMAN Nuclear pore complex protein Nup153 OS=Homo sapiens OX=9606 GN=NUP153 PE=1 SV=2	0.999979	46.7112	1.23432e-19	174.23	157.88	174.23	0.962887	14.1405	8.73465e-05	80.387	0.953747	13.143	7.24558e-06	87.932	0.895764	9.34176	0.000128583	78.69	0.977159	16.3124	6.40657e-06	88.73	0.974302	15.788	0.000310157	72.315	0.794709	5.87838	0.000710791
Q13415	Origin recognition complex subunit 1	ORC1	195		2.0495									Q13415	195	Q13415	Q13415	Origin recognition complex subunit 1	ORC1	sp|Q13415|ORC1_HUMAN Origin recognition complex subunit 1 OS=Homo sapiens OX=9606 GN=ORC1 PE=1 SV=2	0.998318	27.7349	0.00363223	31.514	24.633	31.514
Q9NV06	DDB1- and CUL4-associated factor 13	DCAF13	18	1.9502	1.3732	0.90761		0.91511		0.65226	1.0493			Q9NV06	18	Q9NV06	Q9NV06	DDB1- and CUL4-associated factor 13	DCAF13	sp|Q9NV06|DCA13_HUMAN DDB1- and CUL4-associated factor 13 OS=Homo sapiens OX=9606 GN=DCAF13 PE=1 SV=2	1	65.2463	0.016558	71.501	38.661	65.246	1	71.5012	0.016558	71.501					1	52.9367	0.049287	52.937					1	68.3826	0.0465968	68.383	1	65.2463	0.0243828
Q9Y520	Protein PRRC2C	PRRC2C	1408	1.5887	2.049	1.6504	1.7985	1.5899		1.2963				Q9Y520	1408	Q9Y520	Q9Y520	Protein PRRC2C	PRRC2C	sp|Q9Y520|PRC2C_HUMAN Protein PRRC2C OS=Homo sapiens OX=9606 GN=PRRC2C PE=1 SV=4	0.601387	1.78602	0.000900827	46.926	40.345	46.926	0.519586	0.340411	0.0345192	20.389	0.564334	1.12382	0.00358543	36.597	0.601387	1.78602	0.000900827	46.926					0.568773	1.20234	0.000900827	46.926
Q86UP2	Kinectin	KTN1	443	1.9498	2.0467	2.4209				0.76648	1.8957			Q86UP2	443	Q86UP2	Q86UP2	Kinectin	KTN1	sp|Q86UP2|KTN1_HUMAN Kinectin OS=Homo sapiens OX=9606 GN=KTN1 PE=1 SV=1	0.999959	43.9078	4.92619e-23	122.57	88.475	122.57	0.977438	16.367	5.35509e-08	88.551													0.951338	12.9114	0.0340957	30.969	0.999959	43.9078	4.92619e-23
Q86UK7	Zinc finger protein 598	ZNF598	515	1.9407	1.4927	2.0401	1.67	1.7217		1.1666	1.4158			Q86UK7	515	Q86UK7	Q86UK7	Zinc finger protein 598	ZNF598	sp|Q86UK7|ZN598_HUMAN E3 ubiquitin-protein ligase ZNF598 OS=Homo sapiens OX=9606 GN=ZNF598 PE=1 SV=1	1	33.2479	6.69877e-13	94.281	94.281	33.248	1	62.6167	4.96375e-07	62.617	1	52.7314	1.77385e-11	86.179	1	94.2811	6.69877e-13	94.281					1	54.288	1.90103e-05	54.288	1	33.2479	0.00176209
Q9UIS9	Methyl-CpG-binding domain protein 1	MBD1	117	1.9403	1.7741	2.1335					0.30561			Q9UIS9	117	Q9UIS9	Q9UIS9	Methyl-CpG-binding domain protein 1	MBD1	sp|Q9UIS9|MBD1_HUMAN Methyl-CpG-binding domain protein 1 OS=Homo sapiens OX=9606 GN=MBD1 PE=1 SV=2	1	39.6296	3.24792e-09	55.629	55.629	39.63	1	30.0472	0.000867282	30.047	1	46.0819	1.12852e-07	46.082													1	26.1665	0.0182806
P22087	rRNA 2'-O-methyltransferase fibrillarin	FBL	162		2.0451	1.0798	1.8226	1.2628		0.58086				P22087	162	P22087	P22087	rRNA 2'-O-methyltransferase fibrillarin	FBL	sp|P22087|FBRL_HUMAN rRNA 2'-O-methyltransferase fibrillarin OS=Homo sapiens OX=9606 GN=FBL PE=1 SV=2	0.607991	1.90601	6.89002e-13	95.767	95.767	73.464	0.561445	1.07283	0.000143362	47.204	0.599745	1.75631	6.89002e-13	95.767	0.580754	1.41523	1.68171e-10	82.813					0.607991	1.90601	5.51582e-09	73.464
P11387	DNA topoisomerase 1	TOP1	391	1.9399	1.8309	1.2817	1.7258	1.7843	1.9462		1.1035			P11387	391	P11387	P11387	DNA topoisomerase 1	TOP1	sp|P11387|TOP1_HUMAN DNA topoisomerase 1 OS=Homo sapiens OX=9606 GN=TOP1 PE=1 SV=2	0.999999	58.5101	7.7893e-06	82.102	69.719	62.088	0.999793	36.8402	9.95283e-05	66.285	0.670223	3.07999	7.7893e-06	82.102	0.596354	1.69504	3.27904e-05	72.175	0.999989	49.6253	0.000297421	56.147					0.999994	52.3177	0.00131651
P23396	40S ribosomal protein S3	RPS3	108	1.9393	2.2607	2.3554	2.4007	1.9649	2.0173	0.74816	0.78999	0.8343	0.80709	P23396	108	P23396	P23396	40S ribosomal protein S3	RPS3	sp|P23396|RS3_HUMAN 40S ribosomal protein S3 OS=Homo sapiens OX=9606 GN=RPS3 PE=1 SV=2	1	73.2482	0.000143521	107.57	85.488	73.248	1	107.574	0.00014968	107.57	1	90.1082	0.000282557	99.136	1	99.4417	0.000575016	99.442	1	73.2482	0.000575016	79.974	1	78.1489	0.000143521	98.048	1	80.4381	0.000504064
O60488	Long-chain-fatty-acid--CoA ligase 4	ACSL4	498	1.9322	1.2818	1.1163	1.1002	0.94855	0.86821	1.2265				O60488	498	O60488	O60488	Long-chain-fatty-acid--CoA ligase 4	ACSL4	sp|O60488|ACSL4_HUMAN Long-chain-fatty-acid--CoA ligase 4 OS=Homo sapiens OX=9606 GN=ACSL4 PE=1 SV=2	0.978987	16.6829	5.78536e-20	147.26	136.47	86.772	0.926643	11.0147	2.19943e-07	102.87	0.927035	11.0398	8.88299e-10	112.43	0.92203	10.7282	5.78536e-20	147.26	0.978987	16.6829	1.84687e-05	86.772	0.920878	10.6591	4.03255e-07	101.39
Q9BSD7	Cancer-related nucleoside-triphosphatase	NTPCR	21	1.9278		2.897		1.7424						Q9BSD7	21	Q9BSD7	Q9BSD7	Cancer-related nucleoside-triphosphatase	NTPCR	sp|Q9BSD7|NTPCR_HUMAN Cancer-related nucleoside-triphosphatase OS=Homo sapiens OX=9606 GN=NTPCR PE=1 SV=1	0.996768	24.8914	0.0010746	61.11	49.898	60.628	0.996768	24.8914	0.00111817	60.628					0.977237	16.3278	0.00436784	43.297
Q9NZ01	Very-long-chain enoyl-CoA reductase	TECR	2	1.9262	1.5039	1.1668	1.4797	1.9314		1.6197	1.7769	0.96639	1.0108	Q9NZ01	2	Q9NZ01	Q9NZ01	Very-long-chain enoyl-CoA reductase	TECR	sp|Q9NZ01|TECR_HUMAN Very-long-chain enoyl-CoA reductase OS=Homo sapiens OX=9606 GN=TECR PE=1 SV=1	1	65.2041	0.000729776	82.202	82.202	81.676	0.999983	47.6215	0.0175035	47.621	0.999996	54.2191	0.00865503	54.276	0.999999	58.32	0.00633435	58.32					0.99997	45.2798	0.0222923	45.28	0.999901	40.0246	0.0337359
Q8WUM4	Programmed cell death 6-interacting protein	PDCD6IP	327	1.9232	1.0983	0.78385	0.92539			1.4606	1.0749			Q8WUM4	327	Q8WUM4	Q8WUM4	Programmed cell death 6-interacting protein	PDCD6IP	sp|Q8WUM4|PDC6I_HUMAN Programmed cell death 6-interacting protein OS=Homo sapiens OX=9606 GN=PDCD6IP PE=1 SV=1	0.999973	45.7076	0.00178465	53.252	53.252	53.252	0.999082	30.367	0.011672	33.685	0.999911	40.5155	0.00434031	43.382									0.999973	45.7076	0.00178465	53.252	0.987558	18.9968	0.0262369
Q9H307	Pinin	PNN	157		2.0255		1.1852	1.2714			0.99388			Q9H307	157	Q9H307	Q9H307	Pinin	PNN	sp|Q9H307|PININ_HUMAN Pinin OS=Homo sapiens OX=9606 GN=PNN PE=1 SV=5	1	27.8617	0.0186011	29.299	29.299	27.862					1	29.2989	0.0186011	29.299	1	25.1776	0.0343877	25.178									1	27.8617	0.0677018
P07305	Histone H1.0;Histone H1.0, N-terminally processed	H1F0	12	1.9218	1.9794	2.2203	2.0795	2.4203	2.2872	0.95736	1.0779	0.45425	0.40919	P07305	12	P07305	P07305	Histone H1.0;Histone H1.0, N-terminally processed	H1F0	sp|P07305|H10_HUMAN Histone H1.0 OS=Homo sapiens OX=9606 GN=H1F0 PE=1 SV=3	1	45.7899	1.57249e-29	178.46	159.79	45.79	0.980934	17.1137	5.22812e-27	141.88	0.989195	19.6165	8.60019e-27	137.89	0.993702	21.9805	1.57249e-29	178.46	0.836956	7.10398	6.04689e-13	115.57	1	36.3919	2.98184e-17	128.01	1	45.7899	8.93299e-29
P16403	Histone H1.4;Histone H1.3;Histone H1.1;Histone H1.5;Histone H1.2	HIST1H1E;HIST1H1D;HIST1H1A;HIST1H1B;HIST1H1C	97;98;100;100;97	1.9211	1.7696	1.6336	1.7206	1.4136	1.6437	0.84239	0.94439	1.2385	1.3413	P10412;P16402;Q02539;P16401;P16403	97;98;100;100;97	P10412;P16401;P16403	P16403	Histone H1.4;Histone H1.3;Histone H1.1;Histone H1.5;Histone H1.2	HIST1H1E;HIST1H1D;HIST1H1A;HIST1H1B;HIST1H1C	sp|P10412|H14_HUMAN Histone H1.4 OS=Homo sapiens OX=9606 GN=HIST1H1E PE=1 SV=2;sp|P16402|H13_HUMAN Histone H1.3 OS=Homo sapiens OX=9606 GN=HIST1H1D PE=1 SV=2;sp|Q02539|H11_HUMAN Histone H1.1 OS=Homo sapiens OX=9606 GN=HIST1H1A PE=1 SV=3;sp|P16401|H15_HUMAN	1	156.948	3.14698e-220	288.77	251.71	288.77	1	110.245	2.20048e-115	242.07	1	84.4522	9.36968e-63	199.31	1	130.457	6.70263e-173	268.35	1	91.7032	1.79156e-54	190.27	1	156.948	3.14698e-220	288.77	1	95.403	1.13762e-62
P19338	Nucleolin	NCL	648		2.017									P19338	648	P19338	P19338	Nucleolin	NCL	sp|P19338|NUCL_HUMAN Nucleolin OS=Homo sapiens OX=9606 GN=NCL PE=1 SV=3	0.5	0	0.00790867	46.158	46.158	46.158
O43709	Probable 18S rRNA (guanine-N(7))-methyltransferase	WBSCR22	256	1.9121	1.0815	1.2525	5.5547	1.0063	1.2698	2.8996	6.622			O43709	256	O43709	O43709	Probable 18S rRNA (guanine-N(7))-methyltransferase	WBSCR22	sp|O43709|BUD23_HUMAN Probable 18S rRNA (guanine-N(7))-methyltransferase OS=Homo sapiens OX=9606 GN=BUD23 PE=1 SV=2	1	52.7897	0.00206488	105.4	79.923	52.79	1	64.2973	0.0107287	99.919	1	72.6431	0.00622039	89.247	1	72.6431	0.0132686	89.673	1	52.7897	0.00622039	89.247	1	76.4649	0.00591597	99.919	1	52.7897	0.013637
Q14677	Clathrin interactor 1	CLINT1	467	1.9112	1.2824					0.75985		0.71454	0.6846	Q14677	467	Q14677	Q14677	Clathrin interactor 1	CLINT1	sp|Q14677|EPN4_HUMAN Clathrin interactor 1 OS=Homo sapiens OX=9606 GN=CLINT1 PE=1 SV=1	0.99999	50.0229	1.06036e-61	210.95	210.95	188.27																	0.757186	4.9393	0.0330001	24.225
Q14677	Clathrin interactor 1	CLINT1	200	1.9109	1.4647	1.2689	1.6888	1.104	1.2347	0.98187	1.0863	1.0561		Q14677	200	Q14677	Q14677	Clathrin interactor 1	CLINT1	sp|Q14677|EPN4_HUMAN Clathrin interactor 1 OS=Homo sapiens OX=9606 GN=CLINT1 PE=1 SV=1	0.999738	35.8122	7.23896e-07	96.745	95.417	79.492	0.997397	25.8339	1.62645e-05	76.391	0.999644	34.4845	5.90189e-06	83.966	0.999712	35.4008	7.23896e-07	96.745	0.992096	20.9872	0.000110137	61.265	0.999738	35.8122	1.66211e-05	79.492	0.996563	24.6237	0.000406399
Q9Y490	Talin-1;Talin-2	TLN1;TLN2	1541;1543	1.9096	1.6249	1.6692	1.3929	0.89483	1.232	2.2183				Q9Y490;Q9Y4G6	1541;1543	Q9Y490;Q9Y4G6	Q9Y490	Talin-1;Talin-2	TLN1;TLN2	sp|Q9Y490|TLN1_HUMAN Talin-1 OS=Homo sapiens OX=9606 GN=TLN1 PE=1 SV=3;sp|Q9Y4G6|TLN2_HUMAN Talin-2 OS=Homo sapiens OX=9606 GN=TLN2 PE=1 SV=4	0.990905	20.3723	3.92818e-21	129.84	129.84	88.441	0.990905	20.3723	1.82507e-10	107.35	0.983348	17.7125	3.92818e-21	129.84	0.977322	16.3444	1.26357e-10	109.84	0.765295	5.13306	0.00948547	32.341	0.97488	15.8894	8.9521e-15	119.76
Q9Y394	Dehydrogenase/reductase SDR family member 7	DHRS7	321	1.9017	0.69504	1.045	0.78781	0.84041	0.7234	1.1767	1.1193			Q9Y394	321	Q9Y394	Q9Y394	Dehydrogenase/reductase SDR family member 7	DHRS7	sp|Q9Y394|DHRS7_HUMAN Dehydrogenase/reductase SDR family member 7 OS=Homo sapiens OX=9606 GN=DHRS7 PE=1 SV=1	1	65.3185	1.20914e-09	101.96	101.96	101.96	1	65.3185	1.20914e-09	101.96	0.999996	53.6757	1.18533e-06	76.151	0.999998	57.4665	1.28791e-06	75.383	0.999931	41.6237	0.00145903	56.817	0.999998	57.9958	6.92467e-07	79.837	0.999998	58.0854	1.26241e-06
Q96PU5	E3 ubiquitin-protein ligase NEDD4-like	NEDD4L	462	1.9013	1.5017	1.7257	1.6242	1.9778	1.0376	2.4444	2.1458	0.94332	0.9794	Q96PU5	462	Q96PU5	Q96PU5	E3 ubiquitin-protein ligase NEDD4-like	NEDD4L	sp|Q96PU5|NED4L_HUMAN E3 ubiquitin-protein ligase NEDD4-like OS=Homo sapiens OX=9606 GN=NEDD4L PE=1 SV=2	1	67.4303	3.31425e-127	226.32	226.32	67.43	1	119.873	7.36483e-28	119.87	1	139.826	2.81751e-44	139.83	1	226.316	3.31425e-127	226.32	1	118.346	9.12589e-28	118.35	1	138.215	3.37999e-44	138.22	1	124.307	2.2504e-28
Q13470	Non-receptor tyrosine-protein kinase TNK1	TNK1	108	1.8994	1.7066	1.6102	1.1695	1.1258		1.2268				Q13470	108	Q13470	Q13470	Non-receptor tyrosine-protein kinase TNK1	TNK1	sp|Q13470|TNK1_HUMAN Non-receptor tyrosine-protein kinase TNK1 OS=Homo sapiens OX=9606 GN=TNK1 PE=1 SV=3	1	38.577	7.11873e-14	102.37	93.434	38.577	1	56.936	1.00419e-07	68.567	1	58.9971	4.60692e-06	58.997	1	65.4225	7.64668e-05	65.423					1	95.6659	2.65503e-11	95.666	1	38.577	0.0223545
Q96HS1	Serine/threonine-protein phosphatase PGAM5, mitochondrial	PGAM5	88	1.8969	1.0554	1.0411	1.1111	1.2678		0.95594	0.69104			Q96HS1	88	Q96HS1	Q96HS1	Serine/threonine-protein phosphatase PGAM5, mitochondrial	PGAM5	sp|Q96HS1|PGAM5_HUMAN Serine/threonine-protein phosphatase PGAM5, mitochondrial OS=Homo sapiens OX=9606 GN=PGAM5 PE=1 SV=2	0.999726	35.621	4.8555e-25	128.26	128.26	101.96	0.972228	15.4416	6.90513e-13	106.16	0.998606	28.5519	1.89597e-18	122.31	0.975764	16.0489	0.000144389	50.079					0.999374	32.0324	9.64116e-14	114.29	0.997225	25.5553	5.58331e-10
Q14498	RNA-binding protein 39	RBM39	306		1.9957					1.4367				Q14498	306	Q14498	Q14498	RNA-binding protein 39	RBM39	sp|Q14498|RBM39_HUMAN RNA-binding protein 39 OS=Homo sapiens OX=9606 GN=RBM39 PE=1 SV=2	0.765577	5.13988	0.00712779	29.733	25.561	21.886																	0.765577	5.13988	0.0737456	21.886
Q8NE01	Metal transporter CNNM3	CNNM3	462	1.8955	1.479	1.6593	2.1289						0.97296	Q8NE01	462	Q8NE01	Q8NE01	Metal transporter CNNM3	CNNM3	sp|Q8NE01|CNNM3_HUMAN Metal transporter CNNM3 OS=Homo sapiens OX=9606 GN=CNNM3 PE=1 SV=1	1	33.6241	0.000339616	74.853	74.853	33.624	1	41.5543	0.0166444	41.554	1	33.6241	0.0380742	33.624
Q9ULC3	Ras-related protein Rab-23	RAB23	132	1.8952	1.4591	1.3975	1.6995	1.7709	1.6338	1.5232	1.3663	0.67901	0.75781	Q9ULC3	132	Q9ULC3	Q9ULC3	Ras-related protein Rab-23	RAB23	sp|Q9ULC3|RAB23_HUMAN Ras-related protein Rab-23 OS=Homo sapiens OX=9606 GN=RAB23 PE=1 SV=1	0.999932	41.6481	6.28181e-38	141.13	107.82	106.16	0.999868	38.801	4.15937e-11	99.569	0.99993	41.5646	2.81538e-22	122.17	0.993072	21.5636	6.55815e-07	61.648	0.996144	24.1224	4.20287e-07	65.47	0.999932	41.6481	1.61031e-16	106.16	0.991734	20.7912	1.12934e-09
Q8NC51	Plasminogen activator inhibitor 1 RNA-binding protein	SERBP1	211	1.8938	1.9748	2.6308	2.267	1.4207	1.5207	0.85443	0.81021			Q8NC51	211	Q8NC51	Q8NC51	Plasminogen activator inhibitor 1 RNA-binding protein	SERBP1	sp|Q8NC51|PAIRB_HUMAN Plasminogen activator inhibitor 1 RNA-binding protein OS=Homo sapiens OX=9606 GN=SERBP1 PE=1 SV=2	0.999695	35.1614	2.0512e-15	118.13	106.44	102.28	0.99957	33.659	2.0512e-15	118.13	0.999354	31.8967	8.6816e-08	98.694	0.999695	35.1614	8.91234e-08	102.28	0.971574	15.3376	0.00123808	44.294	0.997603	26.1923	1.83343e-05	73.156	0.984708	18.0885	0.00135167
P31941	DNA dC->dU-editing enzyme APOBEC-3A;DNA dC->dU-editing enzyme APOBEC-3B	APOBEC3A;APOBEC3B	137;320	1.8927	1.1606	1.0929	0.94288	1.4393					1.9857	P31941;Q9UH17	137;320	P31941	P31941	DNA dC->dU-editing enzyme APOBEC-3A;DNA dC->dU-editing enzyme APOBEC-3B	APOBEC3A;APOBEC3B	sp|P31941|ABC3A_HUMAN DNA dC->dU-editing enzyme APOBEC-3A OS=Homo sapiens OX=9606 GN=APOBEC3A PE=1 SV=3;sp|Q9UH17|ABC3B_HUMAN DNA dC->dU-editing enzyme APOBEC-3B OS=Homo sapiens OX=9606 GN=APOBEC3B PE=1 SV=1	1	118.335	8.41764e-18	118.33	118.33	118.33	1	81.3106	4.95363e-07	81.311	1	118.335	8.41764e-18	118.33	1	103.213	6.40459e-10	103.21
Q9NRV9	Heme-binding protein 1	HEBP1	118	1.8926			1.3719	1.1711	1.0343		1.399	2.3858	1.7662	Q9NRV9	118	Q9NRV9	Q9NRV9	Heme-binding protein 1	HEBP1	sp|Q9NRV9|HEBP1_HUMAN Heme-binding protein 1 OS=Homo sapiens OX=9606 GN=HEBP1 PE=1 SV=1	0.923378	10.8103	2.56066e-08	124.68	124.68	100.69					0.5	0	6.88318e-07	69.188	0.784381	5.60841	2.56066e-08	81.157	0.5	0	2.08878e-06	62.203					0.5	0	4.15839e-05
P23193	Transcription elongation factor A protein 1	TCEA1	252	1.8898	1.3886	1.3225	0.98308	1.4571		1.1668				P23193	252	P23193	P23193	Transcription elongation factor A protein 1	TCEA1	sp|P23193|TCEA1_HUMAN Transcription elongation factor A protein 1 OS=Homo sapiens OX=9606 GN=TCEA1 PE=1 SV=2	1	71.9315	1.36485e-16	107.57	107.57	107.57	1	66.5493	3.6474e-11	88.56	0.998353	27.8272	0.00119928	36.111	1	70.082	5.02548e-13	98.165					0.999999	58.2503	1.85022e-09	80.238
P24928	DNA-directed RNA polymerase II subunit RPB1	POLR2A	1008	1.8868	2.393	1.6619	2.798	2.2803		0.82119		1.0725	1.1372	P24928	1008	P24928	P24928	DNA-directed RNA polymerase II subunit RPB1	POLR2A	sp|P24928|RPB1_HUMAN DNA-directed RNA polymerase II subunit RPB1 OS=Homo sapiens OX=9606 GN=POLR2A PE=1 SV=2	0.999972	45.5079	5.01465e-06	85.493	61.559	79.81	0.999972	45.5079	9.92692e-06	79.81	0.97065	15.1945	3.10452e-05	71.08	0.985612	18.357	5.01465e-06	85.493					0.99692	25.1013	0.00152998	42.242
Q6Y7W6	PERQ amino acid-rich with GYF domain-containing protein 2	GIGYF2	1123	1.8863	2.2198	2.3189	2.4268	1.5614	1.9684	1.3239	1.1595	1.0382	1.2716	Q6Y7W6	1123	Q6Y7W6	Q6Y7W6	PERQ amino acid-rich with GYF domain-containing protein 2	GIGYF2	sp|Q6Y7W6|GGYF2_HUMAN GRB10-interacting GYF protein 2 OS=Homo sapiens OX=9606 GN=GIGYF2 PE=1 SV=1	1	110.54	3.66008e-16	178.3	139.49	178.3	1	80.9131	4.525e-07	130.27	1	75.7334	0.000216147	98.904	1	110.54	3.66008e-16	178.3	1	77.4956	0.000263925	91.087	1	92.0303	3.44435e-07	141.39	1	79.2463	0.000230606
A0A1W2PQS6			139	1.97	1.9795	1.875	2.1005	1.5989	1.8657	0.86552				A0A1W2PQS6	139	A0A1W2PQS6	A0A1W2PQS6			tr|A0A1W2PQS6|A0A1W2PQS6_HUMAN RPS10-NUDT3 readthrough OS=Homo sapiens OX=9606 GN=RPS10-NUDT3 PE=4 SV=1	0.589512	1.57193	0.000198493	104.2	80.046	79.906	0.5	0	0.00261207	79.906	0.5	0	0.00686874	68.224	0.5	0	0.00107545	92.439	0.571244	1.24612	0.000198493	104.2	0.5	0	0.019477	49.418
Q9NUQ6	SPATS2-like protein	SPATS2L	464	1.8837	1.4758		1.8524			1.248				Q9NUQ6	464	Q9NUQ6	Q9NUQ6	SPATS2-like protein	SPATS2L	sp|Q9NUQ6|SPS2L_HUMAN SPATS2-like protein OS=Homo sapiens OX=9606 GN=SPATS2L PE=1 SV=2	1	54.8051	2.12678e-08	92.307	79.189	54.805					1	92.3071	2.12678e-08	92.307									1	45.7042	0.000420702	45.704	1	54.8051	0.00194573
Q9UGI8	Testin	TES	244	1.8794	1.6385		1.0827						0.81845	Q9UGI8	244	Q9UGI8	Q9UGI8	Testin	TES	sp|Q9UGI8|TES_HUMAN Testin OS=Homo sapiens OX=9606 GN=TES PE=1 SV=1	1	53.8285	0.000118016	73.834	50.979	53.828					1	53.8285	0.000691843	53.828
O75347	Tubulin-specific chaperone A	TBCA	52	1.8783	1.317	1.3385	1.2774	1.0785	1.0892	1.027	1.0445	1.4089	1.1321	O75347	52	O75347	O75347	Tubulin-specific chaperone A	TBCA	sp|O75347|TBCA_HUMAN Tubulin-specific chaperone A OS=Homo sapiens OX=9606 GN=TBCA PE=1 SV=3	1	114.894	6.77602e-38	179.57	98.869	114.89	1	120.77	5.95371e-11	120.77	1	155.533	1.72652e-12	155.53	1	179.575	6.77602e-38	179.57	1	114.894	2.77929e-06	114.89	1	132.436	1.12381e-29	132.59	1	143.238	3.04302e-12
Q99986	Serine/threonine-protein kinase VRK1	VRK1	314		1.9737					0.92806				Q99986	314	Q99986	Q99986	Serine/threonine-protein kinase VRK1	VRK1	sp|Q99986|VRK1_HUMAN Serine/threonine-protein kinase VRK1 OS=Homo sapiens OX=9606 GN=VRK1 PE=1 SV=1	1	19.754	0.00611388	36.392	36.392	19.754																	1	36.3919	0.00611388	36.392
Q15819	Ubiquitin-conjugating enzyme E2 variant 2	UBE2V2	133	1.8759				1.3381	1.491	1.1686			1.6951	Q15819	133	Q15819	Q15819	Ubiquitin-conjugating enzyme E2 variant 2	UBE2V2	sp|Q15819|UB2V2_HUMAN Ubiquitin-conjugating enzyme E2 variant 2 OS=Homo sapiens OX=9606 GN=UBE2V2 PE=1 SV=4	1	47.559	0.00015257	68.515	68.515	47.559									1	61.3438	0.00015257	61.344	1	47.559	0.00233787	47.559	1	32.0624	0.02632	32.062
P07992	DNA excision repair protein ERCC-1	ERCC1	281	1.8724			1.6812	1.0469			2.8547			P07992	281	P07992	P07992	DNA excision repair protein ERCC-1	ERCC1	sp|P07992|ERCC1_HUMAN DNA excision repair protein ERCC-1 OS=Homo sapiens OX=9606 GN=ERCC1 PE=1 SV=1	1	72.8912	0.000269493	72.891	67.407	72.891					1	40.0246	0.0119627	40.025	1	64.7982	0.00105217	64.798									1	72.8912	0.000269493
P20042	Eukaryotic translation initiation factor 2 subunit 2	EIF2S2	79		1.9691			1.0255		0.90143	1.1515			P20042	79	P20042	P20042	Eukaryotic translation initiation factor 2 subunit 2	EIF2S2	sp|P20042|IF2B_HUMAN Eukaryotic translation initiation factor 2 subunit 2 OS=Homo sapiens OX=9606 GN=EIF2S2 PE=1 SV=2	0.5	0	1.80132e-08	95.81	87.297	71.692									0.5	0	0.00168707	70.977					0.5	0	1.80132e-08	95.81	0.5	0	2.39719e-06
Q96RT1	Protein LAP2	ERBB2IP	785	1.8701	1.1467	1.4427	1.572	1.3824		1.4281	0.86184			Q96RT1	785	Q96RT1	Q96RT1	Protein LAP2	ERBB2IP	sp|Q96RT1|ERBIN_HUMAN Erbin OS=Homo sapiens OX=9606 GN=ERBIN PE=1 SV=2	1	99.73	3.05225e-11	103.17	103.17	103.17	0.99999	49.966	6.24503e-05	50.358	1	68.9858	5.76252e-07	69.747	1	99.73	3.05225e-11	103.17					0.999931	41.6056	0.00504305	42.529	0.999966	44.6807	0.00391044
Q96L50	Leucine-rich repeat protein 1	LRR1	78		1.9636	1.0795	1.1047		0.7269		1.2251			Q96L50	78	Q96L50	Q96L50	Leucine-rich repeat protein 1	LRR1	sp|Q96L50|LLR1_HUMAN Leucine-rich repeat protein 1 OS=Homo sapiens OX=9606 GN=LRR1 PE=1 SV=2	1	25.342	0.00976114	38.783	22.112	25.342	1	31.5969	0.019684	31.597	1	31.5969	0.019684	31.597					1	25.342	0.038502	25.342					1	38.7825	0.00976114
O75475	PC4 and SFRS1-interacting protein	PSIP1	135	1.8695	1.5702	2.4437	2.3413	1.9186	1.8654	0.96292	1.0389			O75475	135	O75475	O75475	PC4 and SFRS1-interacting protein	PSIP1	sp|O75475|PSIP1_HUMAN PC4 and SFRS1-interacting protein OS=Homo sapiens OX=9606 GN=PSIP1 PE=1 SV=1	1	85.2595	3.70058e-42	164.57	154.08	141.46	1	67.6758	1.15113e-18	125.18	1	85.2595	8.57607e-33	141.46	1	74.008	3.70058e-42	164.57	0.99967	34.8162	7.77415e-05	57.798	1	65.6197	1.24315e-24	126.88	0.99993	41.5574	2.70186e-05
P19338	Nucleolin	NCL	589	1.8652	1.8584	1.488	1.8429	2.0965		1.0724	1.2247			P19338	589	P19338	P19338	Nucleolin	NCL	sp|P19338|NUCL_HUMAN Nucleolin OS=Homo sapiens OX=9606 GN=NCL PE=1 SV=3	1	129.154	8.18168e-30	132.84	125.22	129.15	1	73.7832	2.43689e-09	73.783	1	103.104	4.79659e-14	103.1	1	104.894	7.40311e-17	104.89					1	132.839	8.18168e-30	132.84	1	129.154	1.52986e-29
Q5VSY0	G kinase-anchoring protein 1	GKAP1	104	1.8615	1.4177		1.8705	1.9197						Q5VSY0	104	Q5VSY0	Q5VSY0	G kinase-anchoring protein 1	GKAP1	sp|Q5VSY0|GKAP1_HUMAN G kinase-anchoring protein 1 OS=Homo sapiens OX=9606 GN=GKAP1 PE=1 SV=2	1	45.7844	0.000104695	45.784	45.784	45.784					1	45.7844	0.000104695	45.784	1	37.8964	0.000373471	37.896
Q99613	Eukaryotic translation initiation factor 3 subunit C;Eukaryotic translation initiation factor 3 subunit C-like protein	EIF3C;EIF3CL	136;136	1.8608	1.5915	1.4135		2.2443		1.1502	1.3242			Q99613;B5ME19	136;136	Q99613	Q99613	Eukaryotic translation initiation factor 3 subunit C;Eukaryotic translation initiation factor 3 subunit C-like protein	EIF3C;EIF3CL	sp|Q99613|EIF3C_HUMAN Eukaryotic translation initiation factor 3 subunit C OS=Homo sapiens OX=9606 GN=EIF3C PE=1 SV=1;sp|B5ME19|EIFCL_HUMAN Eukaryotic translation initiation factor 3 subunit C-like protein OS=Homo sapiens OX=9606 GN=EIF3CL PE=3 SV=1	1	62.3026	6.82787e-05	112.11	101.3	62.303	1	70.0564	0.00694247	70.056					1	53.5167	0.0188813	53.517					1	95.5732	0.00100305	95.573	1	62.3026	0.0127378
P07737	Profilin-1	PFN1	70	1.8589	1.2063	1.2542	1.152	1.4149	1.6864	1.1301	1.0965	0.5854	0.5905	P07737	70	P07737	P07737	Profilin-1	PFN1	sp|P07737|PROF1_HUMAN Profilin-1 OS=Homo sapiens OX=9606 GN=PFN1 PE=1 SV=2	1	131.666	3.53997e-187	274.24	274.24	131.67	1	200.127	1.80016e-75	200.13	1	128.901	1.1686e-48	149.95	1	151.948	9.02527e-49	151.95	1	131.666	2.58114e-29	131.67	1	126.948	3.63282e-29	129.46	1	131.666	2.58114e-29
P39748	Flap endonuclease 1	FEN1	125		1.9503		0.93651					0.95034	0.81184	P39748	125	P39748	P39748	Flap endonuclease 1	FEN1	sp|P39748|FEN1_HUMAN Flap endonuclease 1 OS=Homo sapiens OX=9606 GN=FEN1 PE=1 SV=1	0.712454	3.9405	2.33307e-09	79.489	79.489	79.489					0.615886	2.05039	0.000177714	46.15
Q09666	Neuroblast differentiation-associated protein AHNAK	AHNAK	5725		1.9482		1.3628	2.4462						Q09666	5725	Q09666	Q09666	Neuroblast differentiation-associated protein AHNAK	AHNAK	sp|Q09666|AHNK_HUMAN Neuroblast differentiation-associated protein AHNAK OS=Homo sapiens OX=9606 GN=AHNAK PE=1 SV=2	0.99942	32.3659	0.00375255	35.624	11.912	32.366	0.999364	31.9622	0.0365459	35.624	0.998321	27.7419	0.0420885	28.748	0.99942	32.3659	0.00375255	32.366
P09874	Poly [ADP-ribose] polymerase 1	PARP1	414	1.8586	2.0001	1.6065	2.6885	1.9476				0.5384	0.56017	P09874	414	P09874	P09874	Poly [ADP-ribose] polymerase 1	PARP1	sp|P09874|PARP1_HUMAN Poly [ADP-ribose] polymerase 1 OS=Homo sapiens OX=9606 GN=PARP1 PE=1 SV=4	0.92275	10.7718	0.00507095	82.426	29.64	72.879	0.846657	7.42044	0.00507095	81.548	0.8104	6.30862	0.0250899	54.157	0.881604	8.71937	0.0263156	53.166
Q00688	Peptidyl-prolyl cis-trans isomerase FKBP3	FKBP3	80	1.8558	1.358						0.95968			Q00688	80	Q00688	Q00688	Peptidyl-prolyl cis-trans isomerase FKBP3	FKBP3	sp|Q00688|FKBP3_HUMAN Peptidyl-prolyl cis-trans isomerase FKBP3 OS=Homo sapiens OX=9606 GN=FKBP3 PE=1 SV=1	0.999975	46.1031	3.53562e-05	91.701	79.988	91.701																					0.997559	26.1136	0.0013353
Q7L576	Cytoplasmic FMR1-interacting protein 1	CYFIP1	540	1.8544	1.4471		1.0684	0.72593	0.77914	1.2581				Q7L576	540	Q7L576	Q7L576	Cytoplasmic FMR1-interacting protein 1	CYFIP1	sp|Q7L576|CYFP1_HUMAN Cytoplasmic FMR1-interacting protein 1 OS=Homo sapiens OX=9606 GN=CYFIP1 PE=1 SV=1	0.993725	22.1243	0.00173855	57.802	39.493	57.802					0.992144	22.3222	0.00211335	54.524	0.963318	17.2012	0.00557487	43.184	0.989514	20.9956	0.00333793	48.659	0.993605	23.8865	0.00228757	53.001	0.94855	12.8033	0.0344736
Q8NC51	Plasminogen activator inhibitor 1 RNA-binding protein	SERBP1	102	1.8541	2.4173				1.1342		0.74159			Q8NC51	102	Q8NC51	Q8NC51	Plasminogen activator inhibitor 1 RNA-binding protein	SERBP1	sp|Q8NC51|PAIRB_HUMAN Plasminogen activator inhibitor 1 RNA-binding protein OS=Homo sapiens OX=9606 GN=SERBP1 PE=1 SV=2	0.883912	8.81621	8.8414e-05	97.635	84.845	97.635													0.839379	7.18156	0.027363	60.118					0.547571	0.828901	0.000628921
Q14517	Protocadherin Fat 1;Protocadherin Fat 1, nuclear form	FAT1	4236	1.853			1.2264	1.052	1.2689		2.574		1.6202	Q14517	4236	Q14517	Q14517	Protocadherin Fat 1;Protocadherin Fat 1, nuclear form	FAT1	sp|Q14517|FAT1_HUMAN Protocadherin Fat 1 OS=Homo sapiens OX=9606 GN=FAT1 PE=1 SV=2	0.985112	18.2063	2.41629e-22	116.29	107.35	74.464					0.953408	13.1097	4.91462e-06	77.899	0.985112	18.2063	2.41629e-22	116.29	0.980231	16.9535	0.0041162	56.258					0.9678	14.7793	0.0334316
P17096	High mobility group protein HMG-I/HMG-Y	HMGA1	46	1.8519	1.4917	1.9454	1.7785	1.4542	1.4663	1.1765	1.2186			P17096	46	P17096	P17096	High mobility group protein HMG-I/HMG-Y	HMGA1	sp|P17096|HMGA1_HUMAN High mobility group protein HMG-I/HMG-Y OS=Homo sapiens OX=9606 GN=HMGA1 PE=1 SV=3	1	94.2973	4.64199e-176	245.41	230.8	209.3	0.999998	57.686	3.14035e-52	144.22	1	63.7375	1.66237e-127	215.68	1	94.2973	1.41284e-127	216.87	1	74.7929	3.05886e-115	210.16	1	63.2229	8.32729e-128	219.64	1	73.9095	4.64199e-176
Q92503	SEC14-like protein 1	SEC14L1	160	1.8509	2.0085	1.6782				1.6478	2.1839	1.4158		Q92503	160	Q92503	Q92503	SEC14-like protein 1	SEC14L1	sp|Q92503|S14L1_HUMAN SEC14-like protein 1 OS=Homo sapiens OX=9606 GN=SEC14L1 PE=1 SV=2	1	61.7795	1.42191e-07	125.74	125.74	61.78	1	96.3311	2.65502e-05	107.83													1	117.673	1.23417e-06	117.67	1	61.7795	0.0131287
Q8WUA2	Peptidyl-prolyl cis-trans isomerase-like 4	PPIL4	383		1.9345									Q8WUA2	383	Q8WUA2	Q8WUA2	Peptidyl-prolyl cis-trans isomerase-like 4	PPIL4	sp|Q8WUA2|PPIL4_HUMAN Peptidyl-prolyl cis-trans isomerase-like 4 OS=Homo sapiens OX=9606 GN=PPIL4 PE=1 SV=1	0.641788	2.53251	2.50858e-08	64.723	60.274	64.723
Q9BWJ5	Splicing factor 3B subunit 5	SF3B5	71	1.8474	0.68233	0.92034	0.91049	0.90059		0.79803				Q9BWJ5	71	Q9BWJ5	Q9BWJ5	Splicing factor 3B subunit 5	SF3B5	sp|Q9BWJ5|SF3B5_HUMAN Splicing factor 3B subunit 5 OS=Homo sapiens OX=9606 GN=SF3B5 PE=1 SV=1	0.999999	61.0263	6.94178e-12	74.214	66.882	74.214	0.999858	38.4651	0.000209931	46.362	0.998769	29.0925	0.000878629	36.805	0.999999	61.0263	6.94178e-12	74.214					0.999989	49.6958	3.99481e-08	63.857
Q96J01	THO complex subunit 3	THOC3	171	1.8469	1.3405	0.88447	1.1219	1.2991	1.2733	0.78964	0.80639	0.91448	1.0796	Q96J01	171	Q96J01	Q96J01	THO complex subunit 3	THOC3	sp|Q96J01|THOC3_HUMAN THO complex subunit 3 OS=Homo sapiens OX=9606 GN=THOC3 PE=1 SV=1	1	56.5691	8.60834e-07	97.69	84.922	56.569	1	58.0713	0.000826849	58.071	1	76.588	8.1634e-05	76.588	1	97.6896	8.60834e-07	97.69	1	56.5691	0.000945673	56.569	1	86.2909	1.96404e-05	86.291	1	65.0922	0.00181824
P46783	40S ribosomal protein S10	RPS10	107;107	1.8437	1.6496	1.7701	1.9714	1.4043	1.5789	0.70806	0.69992	1.1633	1.0498	A0A1W2PQS6;P46783	107;107	A0A1W2PQS6;P46783	P46783	40S ribosomal protein S10	RPS10	tr|A0A1W2PQS6|A0A1W2PQS6_HUMAN RPS10-NUDT3 readthrough OS=Homo sapiens OX=9606 GN=RPS10-NUDT3 PE=4 SV=1;sp|P46783|RS10_HUMAN 40S ribosomal protein S10 OS=Homo sapiens OX=9606 GN=RPS10 PE=1 SV=1	1	69.6016	1.72578e-21	174.05	134.42	69.602	1	103.751	1.67765e-12	142.97	1	51.2109	5.37891e-14	154.28	1	44.2994	6.13623e-13	158.04	1	69.6016	1.69948e-16	163.38	1	60.1571	1.15058e-13	149.23	1	99.0107	1.72578e-21
P26599	Polypyrimidine tract-binding protein 1	PTBP1	410	1.8376	1.693	1.2562	1.6184	1.0881	1.4793	1.0553	1.1391	0.60647	0.56905	P26599	410	P26599	P26599	Polypyrimidine tract-binding protein 1	PTBP1	sp|P26599|PTBP1_HUMAN Polypyrimidine tract-binding protein 1 OS=Homo sapiens OX=9606 GN=PTBP1 PE=1 SV=1	1	94.1915	3.11132e-11	115.33	115.33	94.191	1	95.0183	1.25007e-09	110.66	1	86.7722	1.84687e-05	86.772	1	115.327	3.11132e-11	115.33	1	94.1915	1.2934e-06	94.191	1	112.43	8.88299e-10	112.43	1	73.8478	1.95885e-05
P30050	60S ribosomal protein L12	RPL12	40	1.8375	2.4835	1.8038	2.0536	2.4597		1.5604		0.65827	0.65734	P30050	40	P30050	P30050	60S ribosomal protein L12	RPL12	sp|P30050|RL12_HUMAN 60S ribosomal protein L12 OS=Homo sapiens OX=9606 GN=RPL12 PE=1 SV=1	0.985866	18.4355	0.00126121	96.665	67.192	73.985	0.819201	6.56195	0.0123725	59.153	0.815848	6.46434	0.0142316	55.908	0.85981	7.87685	0.0147156	55.064					0.822798	6.66825	0.0109287	61.65
Q86UK7	Zinc finger protein 598	ZNF598	204		1.919									Q86UK7	204	Q86UK7	Q86UK7	Zinc finger protein 598	ZNF598	sp|Q86UK7|ZN598_HUMAN E3 ubiquitin-protein ligase ZNF598 OS=Homo sapiens OX=9606 GN=ZNF598 PE=1 SV=1	1	29.2989	0.0143175	29.299	29.299	29.299
Q9NWV4	UPF0587 protein C1orf123	C1orf123	55	1.8371	1.0933					0.9919			1.01	Q9NWV4	55	Q9NWV4	Q9NWV4	UPF0587 protein C1orf123	C1orf123	sp|Q9NWV4|CA123_HUMAN UPF0587 protein C1orf123 OS=Homo sapiens OX=9606 GN=C1orf123 PE=1 SV=1	1	18.1363	0.00369327	80.231	40.164	18.136																	1	48.0038	0.00388889	48.004
P27816	Microtubule-associated protein 4	MAP4	871	1.8352	1.9513	1.2739	1.9881	1.165	1.4583	1.1182	1.409			P27816	871	P27816	P27816	Microtubule-associated protein 4	MAP4	sp|P27816|MAP4_HUMAN Microtubule-associated protein 4 OS=Homo sapiens OX=9606 GN=MAP4 PE=1 SV=3	1	51.8194	2.52128e-05	55.536	55.536	51.819	1	47.0883	0.000172518	47.088	1	47.0883	0.000172518	47.088	1	43.1155	0.000318942	43.116	1	51.8194	4.01096e-05	51.819	1	45.3473	0.000236687	45.347	1	37.624	0.00100387
Q00403	Transcription initiation factor IIB	GTF2B	305	1.833	1.2814	1.0496	1.1539	1.212		0.70937	0.79766			Q00403	305	Q00403	Q00403	Transcription initiation factor IIB	GTF2B	sp|Q00403|TF2B_HUMAN Transcription initiation factor IIB OS=Homo sapiens OX=9606 GN=GTF2B PE=1 SV=1	0.99989	39.5953	8.35947e-12	72.421	72.421	67.928	0.997638	26.2577	0.000691762	41.412	0.999833	37.7719	8.35947e-12	72.421	0.978341	16.5485	0.00596251	42.913					0.999744	35.9201	0.000109112	51.193	0.991907	20.8834	0.000386323
P51116	Fragile X mental retardation syndrome-related protein 2	FXR2	459		1.9128									P51116	459	P51116	P51116	Fragile X mental retardation syndrome-related protein 2	FXR2	sp|P51116|FXR2_HUMAN Fragile X mental retardation syndrome-related protein 2 OS=Homo sapiens OX=9606 GN=FXR2 PE=1 SV=2	1	32.7202	0.00939031	32.72	29.28	32.72
Q66K64	DDB1- and CUL4-associated factor 15	DCAF15	319	1.8279		1.2945								Q66K64	319	Q66K64	Q66K64	DDB1- and CUL4-associated factor 15	DCAF15	sp|Q66K64|DCA15_HUMAN DDB1- and CUL4-associated factor 15 OS=Homo sapiens OX=9606 GN=DCAF15 PE=1 SV=1	0.923986	10.8477	0.00530893	48.214	39.408	48.214	0.923986	10.8477	0.00530893	48.214
P43246	DNA mismatch repair protein Msh2	MSH2	249	1.8268	1.4725	1.3217	1.4135	1.4666	1.7521	0.60524	0.43876			P43246	249	P43246	P43246	DNA mismatch repair protein Msh2	MSH2	sp|P43246|MSH2_HUMAN DNA mismatch repair protein Msh2 OS=Homo sapiens OX=9606 GN=MSH2 PE=1 SV=1	1	105.157	1.14571e-30	107.19	107.19	107.19	0.999813	37.2827	0.000110228	37.283	0.979539	16.8009	0.0682497	16.801	1	98.2368	8.22925e-27	100.27	0.999887	39.4663	6.28133e-05	39.466	1	91.1234	6.52206e-21	93.446	0.991119	20.4765	0.00476174
Q02952	A-kinase anchor protein 12	AKAP12	491	1.8256	1.1219	1.0849	1.0604	1.079		1.2277	1.698			Q02952	491	Q02952	Q02952	A-kinase anchor protein 12	AKAP12	sp|Q02952|AKA12_HUMAN A-kinase anchor protein 12 OS=Homo sapiens OX=9606 GN=AKAP12 PE=1 SV=4	1	55.0072	3.42024e-21	69.922	69.922	55.007	1	35.9922	4.15095e-05	48.656	1	33.4503	4.37179e-15	69.922	1	39.0855	3.32975e-10	48.909					1	38.2373	1.47611e-09	43.302	1	55.0072	3.42024e-21
Q14676	Mediator of DNA damage checkpoint protein 1	MDC1	854	1.8252	1.2359			1.2194		1.0283				Q14676	854	Q14676	Q14676	Mediator of DNA damage checkpoint protein 1	MDC1	sp|Q14676|MDC1_HUMAN Mediator of DNA damage checkpoint protein 1 OS=Homo sapiens OX=9606 GN=MDC1 PE=1 SV=3	0.816657	6.48775	4.14348e-05	74.587	68.006	47.345									0.816657	6.48775	0.00782382	47.345					0.757527	4.94734	0.00455868	38.261
Q96RT1	Protein LAP2	ERBB2IP	694	1.8251	1.1708	1.4495	1.7438	0.93202		0.97459				Q96RT1	694	Q96RT1	Q96RT1	Protein LAP2	ERBB2IP	sp|Q96RT1|ERBIN_HUMAN Erbin OS=Homo sapiens OX=9606 GN=ERBIN PE=1 SV=2	1	66.6632	0.000328022	78.342	63.14	66.663	1	67.0795	0.000328022	78.342	1	66.6632	0.00130823	66.663	1	69.3456	0.000950416	69.346					1	72.1522	0.000444233	75.416
P46013	Antigen KI-67	MKI67	3217	1.8187			1.0388			1.2627				P46013	3217	P46013	P46013	Antigen KI-67	MKI67	sp|P46013|KI67_HUMAN Proliferation marker protein Ki-67 OS=Homo sapiens OX=9606 GN=MKI67 PE=1 SV=2	1	34.3949	1.28317e-07	96.993	84.847	34.395					1	34.3949	0.00554386	34.395									1	44.0054	0.00146496	44.005
Q8NBU5	ATPase family AAA domain-containing protein 1	ATAD1	300	0.84869	1.8983	1.2733		1.0863						Q8NBU5	300	Q8NBU5	Q8NBU5	ATPase family AAA domain-containing protein 1	ATAD1	sp|Q8NBU5|ATAD1_HUMAN ATPase family AAA domain-containing protein 1 OS=Homo sapiens OX=9606 GN=ATAD1 PE=1 SV=1	1	10.2582	0.00363991	26.627	26.627	10.258	1	26.6269	0.00363991	26.627					1	18.8806	0.0130395	18.881
Q9BSD7	Cancer-related nucleoside-triphosphatase	NTPCR	171	1.8184	2.1418					1.0619				Q9BSD7	171	Q9BSD7	Q9BSD7	Cancer-related nucleoside-triphosphatase	NTPCR	sp|Q9BSD7|NTPCR_HUMAN Cancer-related nucleoside-triphosphatase OS=Homo sapiens OX=9606 GN=NTPCR PE=1 SV=1	1	47.1869	0.00154881	72.643	51.179	47.187					1	47.1869	0.0232309	47.187									1	42.0009	0.0102779	42.001
P46013	Antigen KI-67	MKI67	204	1.8143	1.0954	2.0623	1.6823	0.99303	0.82876	1.3063		0.96242	0.94743	P46013	204	P46013	P46013	Antigen KI-67	MKI67	sp|P46013|KI67_HUMAN Proliferation marker protein Ki-67 OS=Homo sapiens OX=9606 GN=MKI67 PE=1 SV=2	0.999766	36.3073	2.85913e-25	132.59	132.59	132.47	0.996767	24.8904	9.84785e-10	100.35	0.997018	25.2414	4.04833e-25	130.56	0.999766	36.3073	2.85913e-25	132.47	0.951083	12.8876	0.000137569	71.558	0.99826	27.5873	4.41485e-11	104.44	0.995659	23.6057	5.09597e-10
Q86UE4	Protein LYRIC	MTDH	526	1.8124				0.96704	1.6545	0.75276				Q86UE4	526	Q86UE4	Q86UE4	Protein LYRIC	MTDH	sp|Q86UE4|LYRIC_HUMAN Protein LYRIC OS=Homo sapiens OX=9606 GN=MTDH PE=1 SV=2	0.965108	14.4185	2.017e-06	59.512	43.92	59.512									0.965108	14.4185	2.017e-06	59.512	0.803862	6.12619	4.69548e-06	57.009	0.5	0	0.0126121	36.481
Q96PZ2	Protein FAM111A	FAM111A	286	1.8122	1.6891	2.2358	2.4975	1.9785	2.3481	1.3312		2.2307	2.1264	Q96PZ2	286	Q96PZ2	Q96PZ2	Protein FAM111A	FAM111A	sp|Q96PZ2|F111A_HUMAN Protein FAM111A OS=Homo sapiens OX=9606 GN=FAM111A PE=1 SV=2	1	78.6898	7.25783e-25	129.93	129.93	78.69	1	103.791	3.15639e-10	103.79	1	129.93	7.25783e-25	129.93	1	87.5193	1.32692e-07	87.519	1	78.6898	7.04266e-07	78.69	1	66.9649	1.1857e-05	66.965
Q9UI14	Prenylated Rab acceptor protein 1	RABAC1	24	1.8104	1.6222	0.62463		1.024		0.89281	0.55541	1.2361		Q9UI14	24	Q9UI14	Q9UI14	Prenylated Rab acceptor protein 1	RABAC1	sp|Q9UI14|PRAF1_HUMAN Prenylated Rab acceptor protein 1 OS=Homo sapiens OX=9606 GN=RABAC1 PE=1 SV=1	1	47.3921	8.96303e-08	78.413	69.412	47.392	1	39.6472	0.000249123	39.647	1	35.9726	0.0181013	35.973	1	52.5411	1.71966e-05	52.541					1	78.4134	8.96303e-08	78.413	1	47.3921	0.00122368
P27694	Replication protein A 70 kDa DNA-binding subunit;Replication protein A 70 kDa DNA-binding subunit, N-terminally processed	RPA1	183	1.8101				1.5652				0.94345	0.83988	P27694	183	P27694	P27694	Replication protein A 70 kDa DNA-binding subunit;Replication protein A 70 kDa DNA-binding subunit, N-terminally processed	RPA1	sp|P27694|RFA1_HUMAN Replication protein A 70 kDa DNA-binding subunit OS=Homo sapiens OX=9606 GN=RPA1 PE=1 SV=2	0.999999	62.1581	1.81849e-09	86.604	86.604	66.36									0.999999	62.1581	1.81849e-09	66.36
Q14C86	GTPase-activating protein and VPS9 domain-containing protein 1	GAPVD1	24	1.8088	1.473	1.5604		1.1513		1.8017		1.7012	1.7295	Q14C86	24	Q14C86	Q14C86	GTPase-activating protein and VPS9 domain-containing protein 1	GAPVD1	sp|Q14C86|GAPD1_HUMAN GTPase-activating protein and VPS9 domain-containing protein 1 OS=Homo sapiens OX=9606 GN=GAPVD1 PE=1 SV=2	1	55.0402	5.69885e-05	108.37	74.194	55.04	1	74.4602	0.000951446	74.46					1	50.4595	0.00739018	50.46					1	63.0912	0.00252898	63.091
Q9UG63	ATP-binding cassette sub-family F member 2	ABCF2	315	1.8077	1.4025					1.0117				Q9UG63	315	Q9UG63	Q9UG63	ATP-binding cassette sub-family F member 2	ABCF2	sp|Q9UG63|ABCF2_HUMAN ATP-binding cassette sub-family F member 2 OS=Homo sapiens OX=9606 GN=ABCF2 PE=1 SV=2	1	43.7611	0.00329621	43.761	39.445	43.761																	1	42.3169	0.0036953	42.317
Q92890	Ubiquitin fusion degradation protein 1 homolog	UFD1L	279	1.8073		0.80745		0.97932	0.94239	4.0678	0.81173			Q92890	279	Q92890	Q92890	Ubiquitin fusion degradation protein 1 homolog	UFD1L	sp|Q92890|UFD1_HUMAN Ubiquitin recognition factor in ER-associated degradation protein 1 OS=Homo sapiens OX=9606 GN=UFD1 PE=1 SV=3	1	91.4407	3.28542e-05	102.28	76.153	91.441	1	18.9062	0.0652424	18.906					1	67.9969	0.000142119	67.997	1	91.4407	3.28542e-05	91.441	1	88.5072	0.00172115	88.507	1	102.277	4.41005e-05
Q92890	Ubiquitin fusion degradation protein 1 homolog	UFD1L	280	1.8073		0.80745		0.97932	0.94239	4.0678	0.81173			Q92890	280	Q92890	Q92890	Ubiquitin fusion degradation protein 1 homolog	UFD1L	sp|Q92890|UFD1_HUMAN Ubiquitin recognition factor in ER-associated degradation protein 1 OS=Homo sapiens OX=9606 GN=UFD1 PE=1 SV=3	1	91.4407	3.28542e-05	102.28	76.153	91.441	1	18.9062	0.0652424	18.906					1	67.9969	0.000142119	67.997	1	91.4407	3.28542e-05	91.441	1	88.5072	0.00172115	88.507	1	102.277	4.41005e-05
Q96TA1	Niban-like protein 1	FAM129B	467	1.8053	2.1716	2.0154	2.13	2.0717		1.1127	1.2354		0.81181	Q96TA1	467	Q96TA1	Q96TA1	Niban-like protein 1	FAM129B	sp|Q96TA1|NIBL1_HUMAN Niban-like protein 1 OS=Homo sapiens OX=9606 GN=FAM129B PE=1 SV=3	1	117.036	6.78246e-18	180.87	143.71	117.04	1	91.318	0.00062178	91.318	1	77.6774	0.00113942	106.04	1	50.8046	6.78246e-18	180.87					1	123.983	0.000203389	123.98	1	117.036	0.000303312
Q01085	Nucleolysin TIA-1 isoform p40;Nucleolysin TIAR	TIA1;TIAL1	89;91	1.5228	1.8796	2.5074	2.2512	1.453	1.593	1.0769	0.86348			P31483;Q01085	89;91	P31483;Q01085	Q01085	Nucleolysin TIA-1 isoform p40;Nucleolysin TIAR	TIA1;TIAL1	sp|P31483|TIA1_HUMAN Nucleolysin TIA-1 isoform p40 OS=Homo sapiens OX=9606 GN=TIA1 PE=1 SV=3;sp|Q01085|TIAR_HUMAN Nucleolysin TIAR OS=Homo sapiens OX=9606 GN=TIAL1 PE=1 SV=1	0.552686	0.918655	0.000725246	72.79	72.79	55.261	0.537835	0.658514	0.00410904	53.683	0.552686	0.918655	0.00133483	55.261	0.546098	0.803081	0.000725246	72.79	0.546519	0.810456	0.00267413	46.88	0.530358	0.528025	0.0115498	31.526	0.522785	0.396087	0.0246555
Q01658	Protein Dr1	DR1	128	1.7982									0.71247	Q01658	128	Q01658	Q01658	Protein Dr1	DR1	sp|Q01658|NC2B_HUMAN Protein Dr1 OS=Homo sapiens OX=9606 GN=DR1 PE=1 SV=1	1	36.5138	1.11365e-05	78.554	78.554	36.514	1	41.0801	0.0358954	41.08																	1	36.5138	0.0526728
Q9GZS3	WD repeat-containing protein 61;WD repeat-containing protein 61, N-terminally processed	WDR61	97	1.7981		1.256	1.1747			0.94122				Q9GZS3	97	Q9GZS3	Q9GZS3	WD repeat-containing protein 61;WD repeat-containing protein 61, N-terminally processed	WDR61	sp|Q9GZS3|WDR61_HUMAN WD repeat-containing protein 61 OS=Homo sapiens OX=9606 GN=WDR61 PE=1 SV=1	0.959612	13.7584	0.000111549	86.014	57.731	78.488	0.959612	13.7584	0.000322202	78.488	0.748107	4.72747	0.00221121	59.198									0.540258	0.700867	0.0485544	21.733
Q9H5V9	UPF0428 protein CXorf56	CXorf56	153		1.8691									Q9H5V9	153	Q9H5V9	Q9H5V9	UPF0428 protein CXorf56	CXorf56	sp|Q9H5V9|CX056_HUMAN UPF0428 protein CXorf56 OS=Homo sapiens OX=9606 GN=CXorf56 PE=1 SV=1	1	19.9754	0.0158157	19.975	17.01	19.975
P27816	Microtubule-associated protein 4	MAP4	933	1.7935	1.4437	1.4214	1.3978	1.471	1.3928	1.8085	1.4125	0.81537	0.91838	P27816	933	P27816	P27816	Microtubule-associated protein 4	MAP4	sp|P27816|MAP4_HUMAN Microtubule-associated protein 4 OS=Homo sapiens OX=9606 GN=MAP4 PE=1 SV=3	1	77.7756	8.11951e-22	128.9	128.9	77.776	1	50.2837	8.11951e-22	128.9	1	96.7337	2.9891e-07	96.734	1	110.293	5.39909e-09	110.29	1	77.7756	3.11922e-05	77.776	1	33.4088	3.09117e-07	96.464	1	76.7283	0.000265213
O00418	Eukaryotic elongation factor 2 kinase	EEF2K	341	1.7932	1.5889	1.6451	1.2846	1.4911	1.904	2.1721		1.1809	1.0999	O00418	341	O00418	O00418	Eukaryotic elongation factor 2 kinase	EEF2K	sp|O00418|EF2K_HUMAN Eukaryotic elongation factor 2 kinase OS=Homo sapiens OX=9606 GN=EEF2K PE=1 SV=2	0.999973	45.6665	1.57763e-11	151.13	85.895	151.13	0.999818	37.3953	1.57763e-11	114.74	0.997524	26.0519	2.1529e-07	98.943	0.999763	36.2565	1.57763e-11	114.74	0.991398	20.6164	0.00219546	44.807	0.998259	27.5854	9.75451e-11	111.12	0.999908	40.3632	5.84365e-06
P30876	DNA-directed RNA polymerase II subunit RPB2	POLR2B	421	1.7929	0.88878	1.0419	0.78703	1.5405	1.2761	1.1668	1.2267			P30876	421	P30876	P30876	DNA-directed RNA polymerase II subunit RPB2	POLR2B	sp|P30876|RPB2_HUMAN DNA-directed RNA polymerase II subunit RPB2 OS=Homo sapiens OX=9606 GN=POLR2B PE=1 SV=1	1	28.1771	0.00154881	95.099	62.878	28.177	1	95.0987	0.00154881	95.099	1	70.0564	0.00185174	70.056	1	72.6431	0.00154881	72.643	1	28.1771	0.032904	28.177	1	81.5944	0.00292425	81.594	1	35.6521	0.0183617
O60488	Long-chain-fatty-acid--CoA ligase 4	ACSL4	360	1.7917	1.4432	1.3996	1.2522	1.5113		1.0863		0.51633	0.48723	O60488	360	O60488	O60488	Long-chain-fatty-acid--CoA ligase 4	ACSL4	sp|O60488|ACSL4_HUMAN Long-chain-fatty-acid--CoA ligase 4 OS=Homo sapiens OX=9606 GN=ACSL4 PE=1 SV=2	0.99911	30.5022	1.49049e-16	89.365	89.365	85.062	0.978532	16.5877	6.35884e-08	63.165	0.997857	26.6813	2.73534e-06	60.278	0.997928	26.8276	1.49049e-16	89.365					0.99586	23.8121	3.65301e-12	75.646
Q14677	Clathrin interactor 1	CLINT1	625	1.7914	1.2631	0.97826		1.4767		0.66296		0.96397	0.96259	Q14677	625	Q14677	Q14677	Clathrin interactor 1	CLINT1	sp|Q14677|EPN4_HUMAN Clathrin interactor 1 OS=Homo sapiens OX=9606 GN=CLINT1 PE=1 SV=1	1	110.838	4.58575e-19	169.58	169.58	110.84	1	53.2112	0.059103	53.211					1	71.5551	0.0442631	71.555					1	99.5681	0.000354007	99.568
Q13564	NEDD8-activating enzyme E1 regulatory subunit	NAE1	381	1.7897	1.0609		1.0045	0.89496	0.8785	1.7055	1.1201	0.68476	0.70965	Q13564	381	Q13564	Q13564	NEDD8-activating enzyme E1 regulatory subunit	NAE1	sp|Q13564|ULA1_HUMAN NEDD8-activating enzyme E1 regulatory subunit OS=Homo sapiens OX=9606 GN=NAE1 PE=1 SV=1	1	39.4245	1.46571e-39	168.22	168.22	39.424					0.613179	2.00077	1.46571e-39	147.92	0.708109	3.8488	3.70566e-36	147.56	0.535947	0.625546	8.94128e-08	72.184	1	72.4959	6.25483e-06	72.496	1	39.4245	0.000159342
O00161	Synaptosomal-associated protein 23	SNAP23	185	1.7897		2.0571								O00161	185	O00161	O00161	Synaptosomal-associated protein 23	SNAP23	sp|O00161|SNP23_HUMAN Synaptosomal-associated protein 23 OS=Homo sapiens OX=9606 GN=SNAP23 PE=1 SV=1	1	30.9562	0.00064422	50.787	41.533	30.956	1	30.9562	0.0239764	30.956
Q12974	Protein tyrosine phosphatase type IVA 2	PTP4A2	36	1.5105	1.8501	1.3901	1.4086	1.6935	1.0865	0.88551	0.73273	0.92964	1.042	Q12974	36	Q12974	Q12974	Protein tyrosine phosphatase type IVA 2	PTP4A2	sp|Q12974|TP4A2_HUMAN Protein tyrosine phosphatase type IVA 2 OS=Homo sapiens OX=9606 GN=PTP4A2 PE=1 SV=1	1	19.2627	0.000912301	114.51	0	19.263	1	46.1286	0.0142174	46.129	1	42.5986	0.00719956	44.863	1	42.3949	0.00179176	67.704	1	19.2627	0.0609426	19.263	1	35.9081	0.0079378	43.308	1	33.1903	0.00727515
Q8NFW8	N-acylneuraminate cytidylyltransferase	CMAS	185	1.7889	1.4532	1.0304	1.489	1.642	1.3916	1.5581	2.3846			Q8NFW8	185	Q8NFW8	Q8NFW8	N-acylneuraminate cytidylyltransferase	CMAS	sp|Q8NFW8|NEUA_HUMAN N-acylneuraminate cytidylyltransferase OS=Homo sapiens OX=9606 GN=CMAS PE=1 SV=2	1	28.7268	0.00177047	101.33	87.748	28.727	1	101.327	0.00177047	101.33	1	40.5023	0.00177712	101.28	1	46.1582	0.0039616	86.794	1	28.7268	0.0304196	28.727	1	64.2645	0.0141554	64.265	1	40.0015	0.0623844
Q86SK9	Stearoyl-CoA desaturase 5	SCD5	17	1.7885	1.4393	1.7603	1.5571		1.8439		1.4286			Q86SK9	17	Q86SK9	Q86SK9	Stearoyl-CoA desaturase 5	SCD5	sp|Q86SK9|SCD5_HUMAN Stearoyl-CoA desaturase 5 OS=Homo sapiens OX=9606 GN=SCD5 PE=1 SV=2	1	41.2419	0.000967701	69.216	54.863	41.242	1	67.4565	0.00120242	67.456	1	69.216	0.000967701	69.216					1	41.2419	0.00627294	41.242	1	46.1586	0.0214025	46.159	1	57.8017	0.00233753
P11940	Polyadenylate-binding protein 1	PABPC1	625	1.7883	1.1058	0.89463	0.9017	1.002	0.69583	0.96558	0.94964			P11940	625	P11940	P11940	Polyadenylate-binding protein 1	PABPC1	sp|P11940|PABP1_HUMAN Polyadenylate-binding protein 1 OS=Homo sapiens OX=9606 GN=PABPC1 PE=1 SV=2	1	72.5312	3.74883e-62	191.33	191.33	72.531	1	113.767	1.50679e-12	113.77	1	164.038	2.23855e-41	164.04	1	147.259	8.4525e-34	147.26	1	72.5312	9.12111e-06	72.531	1	117.86	4.87526e-17	117.86	1	191.329	3.74883e-62
P60866	40S ribosomal protein S20	RPS20	4	1.7863	1.8143	1.7348	1.6699	1.8496	1.9036	0.85255	0.84194	0.82464	0.807	P60866	4	P60866	P60866	40S ribosomal protein S20	RPS20	sp|P60866|RS20_HUMAN 40S ribosomal protein S20 OS=Homo sapiens OX=9606 GN=RPS20 PE=1 SV=1	1	50.1885	0	332.06	284.07	50.188	1	124.175	0	332.06	1	136.347	5.78313e-198	286.09	1	61.692	1.31241e-276	316.76	1	50.1885	1.66264e-88	223.11	1	39.8487	1.19746e-174	270.8	1	91.4746	2.84472e-56
Q9Y295	Developmentally-regulated GTP-binding protein 1	DRG1	46	1.7861	2.125	1.5307		2.3757	2.2853	0.73725	1.0023	1.4973	1.3427	Q9Y295	46	Q9Y295	Q9Y295	Developmentally-regulated GTP-binding protein 1	DRG1	sp|Q9Y295|DRG1_HUMAN Developmentally-regulated GTP-binding protein 1 OS=Homo sapiens OX=9606 GN=DRG1 PE=1 SV=1	1	65.4279	9.36689e-13	87.772	59.922	65.428	1	70.0915	6.46564e-09	70.091					1	33.8347	9.36689e-13	87.772	1	65.4279	2.09327e-08	65.428	1	54.4409	8.63945e-06	54.441	1	47.018	6.15191e-05
Q15014	Mortality factor 4-like protein 2	MORF4L2	49	1.7826	1.2109	1.4062				1.1991	1.079			Q15014	49	Q15014	Q15014	Mortality factor 4-like protein 2	MORF4L2	sp|Q15014|MO4L2_HUMAN Mortality factor 4-like protein 2 OS=Homo sapiens OX=9606 GN=MORF4L2 PE=1 SV=1	1	34.6123	0.000699495	59.261	28.263	34.612	1	44.2941	0.000699495	44.294													1	44.0054	0.00646874	44.005	1	34.6123	0.0246193
Q8WYP5	Protein ELYS	AHCTF1	2016		1.8355	0.9465								Q8WYP5	2016	Q8WYP5	Q8WYP5	Protein ELYS	AHCTF1	sp|Q8WYP5|ELYS_HUMAN Protein ELYS OS=Homo sapiens OX=9606 GN=AHCTF1 PE=1 SV=3	0.990146	22.8688	0.0185043	31.801	22.013	31.801	0.990146	22.8688	0.0410197	31.801
P46013	Antigen KI-67	MKI67	2883		1.8347					0.91322				P46013	2883	P46013	P46013	Antigen KI-67	MKI67	sp|P46013|KI67_HUMAN Proliferation marker protein Ki-67 OS=Homo sapiens OX=9606 GN=MKI67 PE=1 SV=2	0.551935	1.09547	4.36991e-10	72.086	72.086	72.086	0.482616	0	0.00337999	27.32	0.481436	0.203312	0.0295771	16.299									0.551935	1.09547	4.36991e-10	72.086
P68104	Elongation factor 1-alpha 1;Putative elongation factor 1-alpha-like 3	EEF1A1;EEF1A1P5	392;392	1.7782	1.4658	1.7205	1.663	1.5333	1.6748	0.99769	0.94467	1.1207	1.1466	P68104;Q5VTE0	392;392	P68104	P68104	Elongation factor 1-alpha 1;Putative elongation factor 1-alpha-like 3	EEF1A1;EEF1A1P5	sp|P68104|EF1A1_HUMAN Elongation factor 1-alpha 1 OS=Homo sapiens OX=9606 GN=EEF1A1 PE=1 SV=1;sp|Q5VTE0|EF1A3_HUMAN Putative elongation factor 1-alpha-like 3 OS=Homo sapiens OX=9606 GN=EEF1A1P5 PE=5 SV=1	1	99.7508	1.46175e-51	221.68	112.94	221.68	1	64.4024	5.80634e-30	194.94	1	70.8537	6.31427e-09	154.12	1	89.0073	8.01332e-30	192.26	1	76.0682	2.88542e-51	219.8	1	99.7508	1.46175e-51	221.68	1	69.8182	1.04758e-07
Q86UV5	Ubiquitin carboxyl-terminal hydrolase 48	USP48	689	1.7767	1.9205	2.6929	3.2532			1.2949	1.1123			Q86UV5	689	Q86UV5	Q86UV5	Ubiquitin carboxyl-terminal hydrolase 48	USP48	sp|Q86UV5|UBP48_HUMAN Ubiquitin carboxyl-terminal hydrolase 48 OS=Homo sapiens OX=9606 GN=USP48 PE=1 SV=1	0.999558	33.5485	1.98433e-06	90.707	90.707	90.707	0.999558	33.5485	1.98433e-06	90.707	0.977936	16.4662	1.14255e-05	79.652									0.937773	11.7812	0.0748051	30.172	0.998808	29.2321	4.60252e-06
Q7KZF4	Staphylococcal nuclease domain-containing protein 1	SND1	641	1.7744	2.0101	2.3353	2.2633	1.7196		0.89541		1.134		Q7KZF4	641	Q7KZF4	Q7KZF4	Staphylococcal nuclease domain-containing protein 1	SND1	sp|Q7KZF4|SND1_HUMAN Staphylococcal nuclease domain-containing protein 1 OS=Homo sapiens OX=9606 GN=SND1 PE=1 SV=1	1	102.89	1.64179e-16	124.78	124.78	124.78	1	87.5085	8.627e-16	118.47	1	69.0508	1.43246e-06	91.657	0.999999	61.1502	0.000492292	70.47					1	102.89	1.64179e-16	124.78
Q13435	Splicing factor 3B subunit 2	SF3B2	394	1.7721	3.2432	1.9377	1.3965	1.9299		1.6346	1.4567	1.3189	1.3974	Q13435	394	Q13435	Q13435	Splicing factor 3B subunit 2	SF3B2	sp|Q13435|SF3B2_HUMAN Splicing factor 3B subunit 2 OS=Homo sapiens OX=9606 GN=SF3B2 PE=1 SV=2	0.999999	58.602	3.92414e-14	149.23	113.29	149.23	0.999995	53.2628	2.35691e-12	130.94	0.999747	35.9634	0.00027201	71.558	0.999999	58.602	3.92414e-14	149.23					0.999979	46.7369	5.62381e-07	104.79	0.997255	25.6028	0.00160037
Q9UPU5	Ubiquitin carboxyl-terminal hydrolase 24	USP24	424	0.63919	1.8282									Q9UPU5	424	Q9UPU5	Q9UPU5	Ubiquitin carboxyl-terminal hydrolase 24	USP24	sp|Q9UPU5|UBP24_HUMAN Ubiquitin carboxyl-terminal hydrolase 24 OS=Homo sapiens OX=9606 GN=USP24 PE=1 SV=3	0.531114	0.5412	0.000231337	75.294	43.073	72.089
P26038	Moesin	MSN	211	1.4763	1.8281	1.2291	1.7526	1.6392	1.7066	1.3067	1.1897	1.065	1.1908	P26038	211	P26038	P26038	Moesin	MSN	sp|P26038|MOES_HUMAN Moesin OS=Homo sapiens OX=9606 GN=MSN PE=1 SV=3	0.592561	1.6267	3.49262e-87	215.81	215.81	209.45	0.589304	1.56819	3.49262e-87	215.81	0.592561	1.6267	2.87895e-75	209.45	0.591778	1.61262	1.42086e-39	156.8	0.570454	1.23211	1.37333e-15	115.26	0.568254	1.19315	9.2483e-49	175.21	0.570876	1.23959	2.69328e-40
Q09666	Neuroblast differentiation-associated protein AHNAK	AHNAK	2978	1.8237	1.8267	1.3018		2.3518		2.2586				Q09666	2978	Q09666	Q09666	Neuroblast differentiation-associated protein AHNAK	AHNAK	sp|Q09666|AHNK_HUMAN Neuroblast differentiation-associated protein AHNAK OS=Homo sapiens OX=9606 GN=AHNAK PE=1 SV=2	0.999698	35.2038	0.011922	35.204	7.7944	35.204	0.997745	26.4587	0.0288169	26.532	0.999582	33.7821	0.0601047	33.782	0.999643	34.4659	0.011922	35.204					0.999698	35.2038	0.011922	35.204
O75712	Gap junction beta-3 protein	GJB3	115	1.7714		1.6555		1.6771						O75712	115	O75712	O75712	Gap junction beta-3 protein	GJB3	sp|O75712|CXB3_HUMAN Gap junction beta-3 protein OS=Homo sapiens OX=9606 GN=GJB3 PE=1 SV=1	0.999434	32.466	0.0030965	56.599	44.434	55.885	0.998058	27.1082	0.0030965	56.599					0.999434	32.466	0.0032616	55.885
O00479	High mobility group nucleosome-binding domain-containing protein 4	HMGN4	82	1.7706	2.1485	2.2292	1.7622	1.4067	1.3501	2.0112	1.4241			O00479	82	O00479	O00479	High mobility group nucleosome-binding domain-containing protein 4	HMGN4	sp|O00479|HMGN4_HUMAN High mobility group nucleosome-binding domain-containing protein 4 OS=Homo sapiens OX=9606 GN=HMGN4 PE=1 SV=3	0.999909	40.4228	1.34323e-09	98.796	78.69	89.982	0.998791	29.1695	2.26867e-07	81.692	0.999805	37.1044	1.34323e-09	98.796	0.999324	31.6997	1.51859e-09	98.035	0.999874	38.9913	6.82426e-08	88.551	0.999909	40.4228	5.03418e-08	89.982	0.999909	40.4228	5.03418e-08
P17096	High mobility group protein HMG-I/HMG-Y	HMGA1	7	1.7702	1.6384	2.0092	1.6082	1.5474	1.9285	1.1586	1.1378	0.60045	0.63664	P17096	7	P17096	P17096	High mobility group protein HMG-I/HMG-Y	HMGA1	sp|P17096|HMGA1_HUMAN High mobility group protein HMG-I/HMG-Y OS=Homo sapiens OX=9606 GN=HMGA1 PE=1 SV=3	1	217.248	0	340.29	340.29	309.68	1	228.689	1.15931e-292	326.95	1	235.422	0	336.8	1	194.809	1.18285e-262	310.51	1	217.248	4.85683e-236	309.68	1	253.107	0	340.29	1	214.101	3.64633e-235
Q13263	Transcription intermediary factor 1-beta	TRIM28	31	1.7678	1.1913	1.6761	1.2988	1.2292	0.96883	1.2785	1.1509	1.351	1.3834	Q13263	31	Q13263	Q13263	Transcription intermediary factor 1-beta	TRIM28	sp|Q13263|TIF1B_HUMAN Transcription intermediary factor 1-beta OS=Homo sapiens OX=9606 GN=TRIM28 PE=1 SV=5	1	220.941	0	333.38	322.51	220.94	1	231.072	5.16822e-161	231.07	1	234.479	6.21629e-177	234.48	1	322.449	0	322.45	1	220.941	1.9063e-146	220.94	1	333.38	0	333.38	1	242.742	1.44379e-177
Q9H8M7	Protein FAM188A	FAM188A	16	1.7626	0.61549									Q9H8M7	16	Q9H8M7	Q9H8M7	Protein FAM188A	FAM188A	sp|Q9H8M7|MINY3_HUMAN Ubiquitin carboxyl-terminal hydrolase MINDY-3 OS=Homo sapiens OX=9606 GN=MINDY3 PE=1 SV=1	1	102.978	1.05376e-44	144.88	137.34	102.98
O75821	Eukaryotic translation initiation factor 3 subunit G	EIF3G	209	1.7624	1.6019	1.6354	1.7672	1.4014	1.5323	0.71378	0.80325			O75821	209	O75821	O75821	Eukaryotic translation initiation factor 3 subunit G	EIF3G	sp|O75821|EIF3G_HUMAN Eukaryotic translation initiation factor 3 subunit G OS=Homo sapiens OX=9606 GN=EIF3G PE=1 SV=2	0.995367	23.3215	6.98216e-43	167.69	167.69	162.81	0.992359	21.1349	1.32612e-42	166.04	0.978414	16.5635	1.26697e-38	150.28	0.96433	14.3192	2.40273e-18	121.82	0.908949	9.99469	9.40349e-08	86.488	0.962313	14.0713	2.58766e-29	132.79	0.959517	13.7479	6.98216e-43
P05556	Integrin beta-1	ITGB1	798	1.761			1.0872	1.3749	1.3012		1.1415			P05556	798	P05556	P05556	Integrin beta-1	ITGB1	sp|P05556|ITB1_HUMAN Integrin beta-1 OS=Homo sapiens OX=9606 GN=ITGB1 PE=1 SV=2	1	43.8128	2.64871e-29	157.56	157.56	43.813					0.520593	0.357947	2.64871e-29	157.56	0.561192	1.06838	1.18009e-09	105.86	0.5	0	2.2502e-08	104.52					0.805426	6.16942	2.2502e-08
Q9HCE1	Putative helicase MOV-10	MOV10	324	0.78195	1.8168									Q9HCE1	324	Q9HCE1	Q9HCE1	Putative helicase MOV-10	MOV10	sp|Q9HCE1|MOV10_HUMAN Putative helicase MOV-10 OS=Homo sapiens OX=9606 GN=MOV10 PE=1 SV=2	0.534952	0.608166	7.67927e-05	47.808	47.808	44.105
Q16222	UDP-N-acetylhexosamine pyrophosphorylase;UDP-N-acetylgalactosamine pyrophosphorylase;UDP-N-acetylglucosamine pyrophosphorylase	UAP1	63	1.7568	2.144	1.2421	1.1799			1.982	2.015			Q16222	63	Q16222	Q16222	UDP-N-acetylhexosamine pyrophosphorylase;UDP-N-acetylgalactosamine pyrophosphorylase;UDP-N-acetylglucosamine pyrophosphorylase	UAP1	sp|Q16222|UAP1_HUMAN UDP-N-acetylhexosamine pyrophosphorylase OS=Homo sapiens OX=9606 GN=UAP1 PE=1 SV=3	1	61.2648	7.4595e-07	74.12	50.982	61.265	1	73.4642	7.90883e-07	73.464	1	74.1196	7.4595e-07	74.12									1	64.5075	1.03359e-05	64.507	1	61.2648	1.37359e-05
P50454	Serpin H1	SERPINH1	39	1.7555	1.2209	0.97489	1.9937	1.9117	0.97367		1.3461	0.57043	0.54637	P50454	39	P50454	P50454	Serpin H1	SERPINH1	sp|P50454|SERPH_HUMAN Serpin H1 OS=Homo sapiens OX=9606 GN=SERPINH1 PE=1 SV=2	1	25.1943	0.000197615	97.456	49.854	25.194	1	20.857	0.000197615	81.625	1	49.4481	0.00337969	49.448	1	61.1103	0.00203832	61.11	1	25.1943	0.0343187	25.194					1	53.0339	0.00276869
O76094	Signal recognition particle subunit SRP72	SRP72	504	1.7546	1.0131	1.4579	1.3697	0.92517						O76094	504	O76094	O76094	Signal recognition particle subunit SRP72	SRP72	sp|O76094|SRP72_HUMAN Signal recognition particle subunit SRP72 OS=Homo sapiens OX=9606 GN=SRP72 PE=1 SV=3	0.99971	35.3687	0.000430067	52.522	52.522	46.156	0.999068	30.3027	0.000744512	48.899	0.999017	30.0694	0.00192855	40.857	0.99971	35.3687	0.0011483	46.156
O75367	Core histone macro-H2A.1	H2AFY	236	1.7545		0.88189	1.0244	1.114		0.9212	0.6999		0.75484	O75367	236	O75367	O75367	Core histone macro-H2A.1	H2AFY	sp|O75367|H2AY_HUMAN Core histone macro-H2A.1 OS=Homo sapiens OX=9606 GN=H2AFY PE=1 SV=4	0.877643	8.5569	0.000180679	113.66	77.263	113.66	0.537424	0.651337	0.000180679	65.704	0.513624	0.23674	0.000957845	56.043	0.5	0	0.0356697	40.237					0.554048	0.942586	0.000180679	65.704	0.535667	0.620649	0.0643719
O75608	Acyl-protein thioesterase 1	LYPLA1	190	1.753	1.2974	1.0177	1.0203	1.2369		1.1932				O75608	190	O75608	O75608	Acyl-protein thioesterase 1	LYPLA1	sp|O75608|LYPA1_HUMAN Acyl-protein thioesterase 1 OS=Homo sapiens OX=9606 GN=LYPLA1 PE=1 SV=1	0.999917	40.8318	0.00178878	49.216	49.216	49.216	0.999465	32.7158	0.00564598	38.399	0.926963	11.0352	0.0399218	22.475	0.999917	40.8318	0.00178878	49.216					0.992553	21.2475	0.0488062	31.319
O76021	Ribosomal L1 domain-containing protein 1	RSL1D1	38	1.7527	1.4278	2.1171	1.8132	1.4968		0.86806				O76021	38	O76021	O76021	Ribosomal L1 domain-containing protein 1	RSL1D1	sp|O76021|RL1D1_HUMAN Ribosomal L1 domain-containing protein 1 OS=Homo sapiens OX=9606 GN=RSL1D1 PE=1 SV=3	1	80.5221	0.000201016	80.522	53.113	80.522	1	80.5221	0.000201016	80.522	0.999928	41.4008	0.0166924	41.401	0.999999	59.1551	0.00184444	59.155					0.999995	52.7131	0.00226595	53.557
Q6NZI2	Polymerase I and transcript release factor	PTRF	299	1.7515		1.3427				1.4511		1.3378	1.2295	Q6NZI2	299	Q6NZI2	Q6NZI2	Polymerase I and transcript release factor	PTRF	sp|Q6NZI2|CAVN1_HUMAN Caveolae-associated protein 1 OS=Homo sapiens OX=9606 GN=CAVIN1 PE=1 SV=1	1	58.32	2.56531e-05	167.11	90.886	58.32	1	87.4985	2.56531e-05	87.498													1	58.32	0.0011047	58.32
Q9H2P0	Activity-dependent neuroprotector homeobox protein	ADNP	807	1.7491		1.3957			1.2195	1.7881		1.6822	1.7571	Q9H2P0	807	Q9H2P0	Q9H2P0	Activity-dependent neuroprotector homeobox protein	ADNP	sp|Q9H2P0|ADNP_HUMAN Activity-dependent neuroprotector homeobox protein OS=Homo sapiens OX=9606 GN=ADNP PE=1 SV=1	1	54.6997	0.000502972	96.171	96.171	54.7	1	44.6158	0.00423271	44.616									1	54.6997	0.00511229	54.7	1	44.6158	0.00423271	44.616
Q7KZF4	Staphylococcal nuclease domain-containing protein 1	SND1	676	1.7487	1.9091	1.4361	2.1575	2.4096		0.47214	0.72599			Q7KZF4	676	Q7KZF4	Q7KZF4	Staphylococcal nuclease domain-containing protein 1	SND1	sp|Q7KZF4|SND1_HUMAN Staphylococcal nuclease domain-containing protein 1 OS=Homo sapiens OX=9606 GN=SND1 PE=1 SV=1	1	20.1992	2.55918e-08	66.045	64.522	20.199	1	40.81	0.000171413	40.81	1	66.0447	2.55918e-08	66.045	1	46.1784	3.19493e-08	64.522					1	36.7441	0.000547789	36.744	1	20.1992	0.0163534
Q9P031	Thyroid transcription factor 1-associated protein 26	CCDC59	171		1.7998		0.71248							Q9P031	171	Q9P031	Q9P031	Thyroid transcription factor 1-associated protein 26	CCDC59	sp|Q9P031|TAP26_HUMAN Thyroid transcription factor 1-associated protein 26 OS=Homo sapiens OX=9606 GN=CCDC59 PE=1 SV=2	0.997867	26.7011	0.00634034	28.939	28.939	28.939					0.930808	11.288	0.0403834	18.862
Q16763	Ubiquitin-conjugating enzyme E2 S	UBE2S	198	1.4029	1.7991		1.4578	1.4965	1.4536	0.85221	0.79415	1.8273		Q16763	198	Q16763	Q16763	Ubiquitin-conjugating enzyme E2 S	UBE2S	sp|Q16763|UBE2S_HUMAN Ubiquitin-conjugating enzyme E2 S OS=Homo sapiens OX=9606 GN=UBE2S PE=1 SV=2	0.560998	1.06494	2.47774e-144	222.05	214.18	222.05					0.552593	0.917019	7.48315e-101	171.73	0.541688	0.725881	9.42434e-39	114.74	0.543957	0.765591	3.44723e-52	130.01	0.55362	0.935073	1.30287e-114	184.4	0.5	0	0.00560132
Q9UBZ4	DNA-(apurinic or apyrimidinic site) lyase 2	APEX2	457	1.7448	1.088	1.2971	1.1897	1.183	1.4186	1.044	1.7027	1.1042	1.2181	Q9UBZ4	457	Q9UBZ4	Q9UBZ4	DNA-(apurinic or apyrimidinic site) lyase 2	APEX2	sp|Q9UBZ4|APEX2_HUMAN DNA-(apurinic or apyrimidinic site) lyase 2 OS=Homo sapiens OX=9606 GN=APEX2 PE=1 SV=1	1	51.1346	2.88565e-13	125.74	114.58	51.135	1	104.795	7.17065e-13	119.21	1	104.795	8.86074e-10	112.44	1	125.74	2.88565e-13	125.74	1	51.1346	0.00137554	51.135	1	81.865	2.63598e-05	83.53	1	31.3894	0.0121729
Q14694	Ubiquitin carboxyl-terminal hydrolase 10	USP10	714	1.7426	1.4044	1.8922		1.5467		1.1103				Q14694	714	Q14694	Q14694	Ubiquitin carboxyl-terminal hydrolase 10	USP10	sp|Q14694|UBP10_HUMAN Ubiquitin carboxyl-terminal hydrolase 10 OS=Homo sapiens OX=9606 GN=USP10 PE=1 SV=2	0.998952	29.7906	4.58074e-17	108.92	108.92	86.727	0.942368	12.1355	6.28235e-05	48.616					0.992855	21.4291	4.58074e-17	108.92					0.998952	29.7906	1.97995e-11	86.727
Q9UIS9	Methyl-CpG-binding domain protein 1	MBD1	75	1.742		2.3995	2.4149			1.1817				Q9UIS9	75	Q9UIS9	Q9UIS9	Methyl-CpG-binding domain protein 1	MBD1	sp|Q9UIS9|MBD1_HUMAN Methyl-CpG-binding domain protein 1 OS=Homo sapiens OX=9606 GN=MBD1 PE=1 SV=2	0.999659	34.6725	3.55702e-07	65.784	65.784	65.784	0.913597	10.2422	8.26769e-05	49.066	0.999659	34.6725	3.55702e-07	65.784									0.5	0	0.020937	22.435
Q13573	SNW domain-containing protein 1	SNW1	255		1.7954									Q13573	255	Q13573	Q13573	SNW domain-containing protein 1	SNW1	sp|Q13573|SNW1_HUMAN SNW domain-containing protein 1 OS=Homo sapiens OX=9606 GN=SNW1 PE=1 SV=1	0.5	0	0.0145513	30.858	30.858	30.858
P52926	High mobility group protein HMGI-C	HMGA2	26	1.7419	1.1868	1.7218				1.679	0.96049			P52926	26	P52926	P52926	High mobility group protein HMGI-C	HMGA2	sp|P52926|HMGA2_HUMAN High mobility group protein HMGI-C OS=Homo sapiens OX=9606 GN=HMGA2 PE=1 SV=1	1	54.1175	1.71138e-08	68.49	68.49	54.117	1	68.4896	1.71138e-08	68.49													1	44.4149	0.000121499	44.415	1	54.1175	1.17679e-05
Q13098	COP9 signalosome complex subunit 1	GPS1	467	1.7416	2.5406	1.7151	1.8892	1.5351	1.2832	1.355	1.3542			Q13098	467	Q13098	Q13098	COP9 signalosome complex subunit 1	GPS1	sp|Q13098|CSN1_HUMAN COP9 signalosome complex subunit 1 OS=Homo sapiens OX=9606 GN=GPS1 PE=1 SV=4	1	60.2551	0.000979445	72.2	72.2	60.255	1	72.2004	0.000979445	72.2	1	54.2593	0.00309483	56.359	1	44.3175	0.00649524	44.318	1	60.2551	0.00260039	60.255	1	32.0084	0.0191157	32.008	1	40.5891	0.00808987
Q86UE4	Protein LYRIC	MTDH	195	1.7406	1.9731	2.2029	2.8039	2.0704						Q86UE4	195	Q86UE4	Q86UE4	Protein LYRIC	MTDH	sp|Q86UE4|LYRIC_HUMAN Protein LYRIC OS=Homo sapiens OX=9606 GN=MTDH PE=1 SV=2	1	55.1861	1.71062e-07	100.11	88.506	55.186	1	38.9953	0.00216879	44.925	1	55.1861	0.000604171	55.186	1	26.7714	0.000155209	64.842
Q7L1Q6	Basic leucine zipper and W2 domain-containing protein 1	BZW1	231	1.7403	0.80175	1.103		1.311		1.9613				Q7L1Q6	231	Q7L1Q6	Q7L1Q6	Basic leucine zipper and W2 domain-containing protein 1	BZW1	sp|Q7L1Q6|BZW1_HUMAN Basic leucine zipper and W2 domain-containing protein 1 OS=Homo sapiens OX=9606 GN=BZW1 PE=1 SV=1	0.999999	59.4862	3.18919e-09	97.579	90.998	97.579	0.999786	36.7009	1.03665e-05	68.576					0.999999	59.4862	3.18919e-09	97.579					0.999959	43.8395	9.06698e-07	78.234
P07910	Heterogeneous nuclear ribonucleoproteins C1/C2;Heterogeneous nuclear ribonucleoprotein C-like 1;Heterogeneous nuclear ribonucleoprotein C-like 2;Heterogeneous nuclear ribonucleoprotein C-like 4;Heterogeneous nuclear ribonucleoprotein C-like 3	HNRNPC;HNRNPCL1;HNRNPCL2;HNRNPCL4;HNRNPCL3	189;176;176;176;176;176;176	1.7397	1.4551	1.8327	1.7089	1.3927	1.4064	1.2894	1.2801			P07910;A0A0G2JNQ3;O60812;B2RXH8;A0A0G2JPF8;P0DMR1;B7ZW38	189;176;176;176;176;176;176	P07910	P07910	Heterogeneous nuclear ribonucleoproteins C1/C2;Heterogeneous nuclear ribonucleoprotein C-like 1;Heterogeneous nuclear ribonucleoprotein C-like 2;Heterogeneous nuclear ribonucleoprotein C-like 4;Heterogeneous nuclear ribonucleoprotein C-like 3	HNRNPC;HNRNPCL1;HNRNPCL2;HNRNPCL4;HNRNPCL3	sp|P07910|HNRPC_HUMAN Heterogeneous nuclear ribonucleoproteins C1/C2 OS=Homo sapiens OX=9606 GN=HNRNPC PE=1 SV=4;tr|A0A0G2JNQ3|A0A0G2JNQ3_HUMAN Heterogeneous nuclear ribonucleoprotein C-like 2 OS=Homo sapiens OX=9606 GN=HNRNPCL2 PE=4 SV=1;sp|O60812|HNRC1_H	1	115.864	3.61823e-06	121.9	64.851	121.9	1	86.3472	0.000911858	91.549	1	86.6442	0.00111125	91.095	1	99.8543	0.000199594	104.79	1	98.225	0.000388477	102.52	1	115.864	3.61823e-06	121.9	1	95.6068	0.000173895
P50990	T-complex protein 1 subunit theta	CCT8	152	1.7346		0.8536	0.67716			1.288		1.1336	0.96126	P50990	152	P50990	P50990	T-complex protein 1 subunit theta	CCT8	sp|P50990|TCPQ_HUMAN T-complex protein 1 subunit theta OS=Homo sapiens OX=9606 GN=CCT8 PE=1 SV=4	1	76.1506	3.52003e-14	156.72	156.72	76.151	1	81.4275	2.44995e-07	81.428	1	76.1506	6.06726e-07	76.151									1	107.825	6.38443e-13	107.82
O43567	E3 ubiquitin-protein ligase RNF13	RNF13	233	1.7335	1.1596	1.4696	1.1037	1.1843	1.3753	1.2144	1.122			O43567	233	O43567	O43567	E3 ubiquitin-protein ligase RNF13	RNF13	sp|O43567|RNF13_HUMAN E3 ubiquitin-protein ligase RNF13 OS=Homo sapiens OX=9606 GN=RNF13 PE=1 SV=1	1	228.609	2.36019e-127	229.86	229.86	229.86	1	212.22	1.14697e-112	213.23	1	228.609	2.36019e-127	229.86	1	201.348	4.38628e-100	202.43	1	151.39	2.49159e-55	154.6	1	168.694	1.84718e-89	196.1	1	160.773	4.61091e-67
Q92995	Ubiquitin carboxyl-terminal hydrolase 13	USP13	328	1.7326	1.4745	1.7572	1.6288	1.4809	1.4667	1.5919	1.4552	0.87133	0.917	Q92995	328	Q92995	Q92995	Ubiquitin carboxyl-terminal hydrolase 13	USP13	sp|Q92995|UBP13_HUMAN Ubiquitin carboxyl-terminal hydrolase 13 OS=Homo sapiens OX=9606 GN=USP13 PE=1 SV=2	1	113.757	1.2528e-20	144.95	144.95	113.76	1	113.757	4.97375e-10	113.76	1	83.2747	1.85463e-05	85.837	1	99.8522	4.11862e-07	101.32	1	72.2241	0.000164199	72.891	1	84.4684	2.40768e-05	84.468	0.999999	61.1674	0.000581952
P10412	Histone H1.4	HIST1H1E	21	1.7283		1.2381	1.2507	1.2091	1.8695	0.94416	0.83209	0.60279	0.61822	P10412	21	P10412	P10412	Histone H1.4	HIST1H1E	sp|P10412|H14_HUMAN Histone H1.4 OS=Homo sapiens OX=9606 GN=HIST1H1E PE=1 SV=2	0.867889	8.17526	2.85771e-76	194.85	194.85	194.85	0.867889	8.17526	2.85771e-76	194.85	0.793543	5.8474	7.31822e-39	143.46	0.728663	4.29018	5.06348e-49	149.34	0.540667	0.708023	5.25675e-05	47.189	0.552025	0.907058	8.93229e-12	88.087	0.714884	3.99214	6.62451e-30
Q92945	Far upstream element-binding protein 2	KHSRP	169	1.7243	1.5545	1.4568	0.85201	1.5267		1.0325	0.87432			Q92945	169	Q92945	Q92945	Far upstream element-binding protein 2	KHSRP	sp|Q92945|FUBP2_HUMAN Far upstream element-binding protein 2 OS=Homo sapiens OX=9606 GN=KHSRP PE=1 SV=4	1	82.0929	2.09014e-08	103.39	91.696	99.796	1	72.6067	2.89734e-06	89.136	0.999999	60.6306	4.43133e-06	86.497	1	74.0468	2.09014e-08	103.39					1	82.0929	8.1222e-08	99.796	1	71.0348	3.55471e-07
O15498	Synaptobrevin homolog YKT6	YKT6	141	1.7234	1.1938	1.0302	1.028	1.1301	1.2837	1.0544	1.0127	0.7179		O15498	141	O15498	O15498	Synaptobrevin homolog YKT6	YKT6	sp|O15498|YKT6_HUMAN Synaptobrevin homolog YKT6 OS=Homo sapiens OX=9606 GN=YKT6 PE=1 SV=1	1	65.6146	4.19873e-09	95.347	95.347	95.347	1	65.6146	4.19873e-09	95.347	0.999951	43.074	0.000147108	52.862	0.999999	60.1055	4.04266e-07	81.992	0.999921	40.9991	0.000176264	50.787	0.999878	39.1386	0.000676775	45.915	0.99999	49.9896	9.40191e-06
Q9BZE4	Nucleolar GTP-binding protein 1	GTPBP4	25	1.7215	1.0111	0.84348	1.044	1.0481		0.80296				Q9BZE4	25	Q9BZE4	Q9BZE4	Nucleolar GTP-binding protein 1	GTPBP4	sp|Q9BZE4|NOG1_HUMAN Nucleolar GTP-binding protein 1 OS=Homo sapiens OX=9606 GN=GTPBP4 PE=1 SV=3	1	58.2232	0.000359643	83.397	64.617	58.223	1	61.3753	0.00105089	61.375	1	59.8981	0.00118413	59.898	1	73.0666	0.00190907	73.067					1	83.3966	0.00152528	83.397	1	58.2232	0.0447888
O75475	PC4 and SFRS1-interacting protein	PSIP1	100	1.7197	1.5278	1.7969	1.6718	1.659	1.9159	1.3675	1.2536			O75475	100	O75475	O75475	PC4 and SFRS1-interacting protein	PSIP1	sp|O75475|PSIP1_HUMAN PC4 and SFRS1-interacting protein OS=Homo sapiens OX=9606 GN=PSIP1 PE=1 SV=1	1	140.377	1.57838e-180	257.5	246.04	215.08	1	113.632	4.48281e-90	200.17	1	130.186	1.57838e-180	257.5	1	115.797	4.27368e-127	223.97	1	140.377	7.44788e-113	215.08	1	135.889	2.39604e-113	220.86	1	121.794	8.42745e-81
I3L0A0	Ubiquitin-conjugating enzyme E2 variant 1	TMEM189-UBE2V1;UBE2V1	358;135	1.7163	1.5726	1.3986		1.2871	1.6227	1.2885	1.3424	0.79932	0.86794	I3L0A0;Q13404	358;135	I3L0A0;Q13404	I3L0A0	Ubiquitin-conjugating enzyme E2 variant 1	TMEM189-UBE2V1;UBE2V1	tr|I3L0A0|I3L0A0_HUMAN HCG2044781 OS=Homo sapiens OX=9606 GN=TMEM189-UBE2V1 PE=4 SV=1;sp|Q13404|UB2V1_HUMAN Ubiquitin-conjugating enzyme E2 variant 1 OS=Homo sapiens OX=9606 GN=UBE2V1 PE=1 SV=2	1	62.4075	5.24109e-13	160.56	104.16	62.408	1	39.917	0.00581177	39.917					1	42.0411	0.00484618	42.041	1	62.4075	0.000137659	62.408	1	56.2251	0.000545579	56.225	1	90.6853	4.45882e-07
Q13283	Ras GTPase-activating protein-binding protein 1	G3BP1	353	1.7145	1.7635	1.966	2.1483	1.7716		0.86085				Q13283	353	Q13283	Q13283	Ras GTPase-activating protein-binding protein 1	G3BP1	sp|Q13283|G3BP1_HUMAN Ras GTPase-activating protein-binding protein 1 OS=Homo sapiens OX=9606 GN=G3BP1 PE=1 SV=1	0.960535	13.863	2.65353e-67	163.18	156.2	119.02	0.918041	10.4926	9.08862e-16	83.064	0.770216	5.25294	0.000169295	42.813	0.911153	10.1095	2.65353e-67	163.18					0.960535	13.863	7.40783e-28	119.02
Q5JTV8	Torsin-1A-interacting protein 1	TOR1AIP1	308	1.7145	1.4769	1.4304	1.4315	1.4226		1.9806	1.7183	0.35646	0.36229	Q5JTV8	308	Q5JTV8	Q5JTV8	Torsin-1A-interacting protein 1	TOR1AIP1	sp|Q5JTV8|TOIP1_HUMAN Torsin-1A-interacting protein 1 OS=Homo sapiens OX=9606 GN=TOR1AIP1 PE=1 SV=2	1	110.747	4.99076e-80	181.26	181.26	110.75	1	109.076	3.47195e-44	141.78	1	110.747	7.02583e-55	149.71	1	137.085	6.14362e-44	137.09					1	181.257	4.99076e-80	181.26	1	134.856	1.71287e-35
Q8TCD1	UPF0729 protein C18orf32	C18orf32	65	1.713	1.1075	1.5742		1.1255		1.4046		0.95356	1.0819	Q8TCD1	65	Q8TCD1	Q8TCD1	UPF0729 protein C18orf32	C18orf32	sp|Q8TCD1|CR032_HUMAN UPF0729 protein C18orf32 OS=Homo sapiens OX=9606 GN=C18orf32 PE=3 SV=1	0.999991	50.6191	2.88678e-09	91.475	82.654	91.475	0.999991	50.6191	2.88678e-09	91.475	0.974842	15.8826	0.00586899	47.397	0.998071	27.1392	9.27599e-07	67.995					0.999583	33.799	1.36238e-05	58.997	0.949279	12.722	0.00793908
P67809	Nuclease-sensitive element-binding protein 1	YBX1	26	1.7127	1.7828	1.7694	1.0629	0.95375	1.4933	0.69944	0.46438	0.62127	0.60328	P67809	26	P67809	P67809	Nuclease-sensitive element-binding protein 1	YBX1	sp|P67809|YBOX1_HUMAN Nuclease-sensitive element-binding protein 1 OS=Homo sapiens OX=9606 GN=YBX1 PE=1 SV=3	1	95.8887	3.49684e-226	221.46	213.46	221.46	1	73.6111	5.08825e-192	193.32	0.999915	43.7019	3.22971e-43	90.514	1	73.4942	6.86222e-106	147.53	0.980937	20.1249	9.43085e-43	83.241	0.997553	29.1134	8.83536e-25	67.995	0.989338	22.6855	7.29829e-25
Q8NC51	Plasminogen activator inhibitor 1 RNA-binding protein	SERBP1	68	1.7108	1.6177	1.6477	1.6294	1.3507	1.3943	0.93124	0.78684	1.0734	1.1112	Q8NC51	68	Q8NC51	Q8NC51	Plasminogen activator inhibitor 1 RNA-binding protein	SERBP1	sp|Q8NC51|PAIRB_HUMAN Plasminogen activator inhibitor 1 RNA-binding protein OS=Homo sapiens OX=9606 GN=SERBP1 PE=1 SV=2	1	118.239	1.04849e-98	214.54	214.54	118.24	1	59.4341	8.31011e-54	160.43	1	213.992	1.11147e-98	213.99	1	19.5532	2.3258e-59	172.37	1	118.239	2.05618e-86	206.62	1	43.9912	8.62015e-76	197.14	1	89.2612	1.89339e-75
O60506	Heterogeneous nuclear ribonucleoprotein Q	SYNCRIP	221	1.7101	1.5588	1.5181	1.6507	1.7016	1.7832	1.7161	1.5564	1.4354	1.4275	O60506	221	O60506	O60506	Heterogeneous nuclear ribonucleoprotein Q	SYNCRIP	sp|O60506|HNRPQ_HUMAN Heterogeneous nuclear ribonucleoprotein Q OS=Homo sapiens OX=9606 GN=SYNCRIP PE=1 SV=2	1	123.968	4.2037e-116	241.93	241.93	123.97	1	241.932	4.2037e-116	241.93	1	147.639	6.18249e-35	147.64	1	127.753	1.59051e-54	186.85	1	123.968	2.43326e-18	123.97	1	119.557	6.31536e-18	119.56	1	169.252	2.04182e-43
Q96BU1	S100P-binding protein	S100PBP	322		1.7728									Q96BU1	322	Q96BU1	Q96BU1	S100P-binding protein	S100PBP	sp|Q96BU1|S1PBP_HUMAN S100P-binding protein OS=Homo sapiens OX=9606 GN=S100PBP PE=1 SV=1	1	37.3786	0.0105223	37.379	30.267	37.379
O14776	Transcription elongation regulator 1	TCERG1	992	1.7075	1.4724	1.7783	1.677	2.061		2.7241	3.2241	0.84937	0.79602	O14776	992	O14776	O14776	Transcription elongation regulator 1	TCERG1	sp|O14776|TCRG1_HUMAN Transcription elongation regulator 1 OS=Homo sapiens OX=9606 GN=TCERG1 PE=1 SV=2	1	49.1598	0.000942715	95.099	65.95	49.16	1	43.3077	0.00229684	93.649	1	52.5786	0.000942715	95.099	1	46.8189	0.00753211	46.819					1	53.6827	0.00469928	53.683	1	49.1598	0.00619801
Q8IUD2	ELKS/Rab6-interacting/CAST family member 1	ERC1	679	1.7055	1.3011	1.3593		1.0991		1.627				Q8IUD2	679	Q8IUD2	Q8IUD2	ELKS/Rab6-interacting/CAST family member 1	ERC1	sp|Q8IUD2|RB6I2_HUMAN ELKS/Rab6-interacting/CAST family member 1 OS=Homo sapiens OX=9606 GN=ERC1 PE=1 SV=1	0.999574	33.7056	3.44263e-06	78.088	47.66	78.088	0.999574	33.7056	3.44263e-06	78.088					0.807376	6.22365	0.0345779	29.126					0.839844	7.19656	0.0411538	28.202
P53367	Arfaptin-1	ARFIP1	118	1.7042	1.3352	1.5435	1.5346	2.161		0.7745	0.68481		1.0236	P53367	118	P53367	P53367	Arfaptin-1	ARFIP1	sp|P53367|ARFP1_HUMAN Arfaptin-1 OS=Homo sapiens OX=9606 GN=ARFIP1 PE=1 SV=2	0.996397	24.4176	5.77054e-13	108.56	98.072	108.56	0.716244	4.02115	3.97455e-06	69.737	0.939092	11.8803	1.23436e-05	63.145	0.996397	24.4176	5.77054e-13	108.56					0.972801	15.5346	6.45104e-13	107.75	0.79599	5.91256	0.000527991
O00479	High mobility group nucleosome-binding domain-containing protein 4	HMGN4	31	1.7039	1.4376	1.3818	1.2248	1.1121	1.7918	1.1053	1.1385			O00479	31	O00479	O00479	High mobility group nucleosome-binding domain-containing protein 4	HMGN4	sp|O00479|HMGN4_HUMAN High mobility group nucleosome-binding domain-containing protein 4 OS=Homo sapiens OX=9606 GN=HMGN4 PE=1 SV=3	0.999977	46.3774	3.01731e-05	84.566	63.009	84.566	0.999282	31.4335	0.000594244	63.709	0.999085	30.38	0.000372928	67.93	0.998168	27.3625	0.00204152	47.201	0.999612	34.1106	0.00889559	58.831	0.995063	23.0441	0.00324622	46.408	0.999122	30.5598	0.000342367
Q8NC51	Plasminogen activator inhibitor 1 RNA-binding protein	SERBP1	91		1.7677		1.7629							Q8NC51	91	Q8NC51	Q8NC51	Plasminogen activator inhibitor 1 RNA-binding protein	SERBP1	sp|Q8NC51|PAIRB_HUMAN Plasminogen activator inhibitor 1 RNA-binding protein OS=Homo sapiens OX=9606 GN=SERBP1 PE=1 SV=2	0.534047	0.592459	0.016198	48.704	35.041	48.704					0.499991	0	0.0214776	46.408
P56945	Breast cancer anti-estrogen resistance protein 1	BCAR1	685	1.0588	1.7666	1.2706	1.1498	0.80264		1.4424	1.4255			P56945	685	P56945	P56945	Breast cancer anti-estrogen resistance protein 1	BCAR1	sp|P56945|BCAR1_HUMAN Breast cancer anti-estrogen resistance protein 1 OS=Homo sapiens OX=9606 GN=BCAR1 PE=1 SV=2	1	25.0162	0.00230884	65.347	5.5472	25.016	1	29.5335	0.0225333	29.534	1	54.066	0.00230884	62.466	1	65.3469	0.00269091	65.347					1	44.3093	0.00322257	55.353	1	25.0162	0.0398817
P16989	Y-box-binding protein 3	YBX3	353	1.7005	1.1237	1.0482	1.1384	1.0905	1.2079	1.2071	1.3184			P16989	353	P16989	P16989	Y-box-binding protein 3	YBX3	sp|P16989|YBOX3_HUMAN Y-box-binding protein 3 OS=Homo sapiens OX=9606 GN=YBX3 PE=1 SV=4	1	101.203	6.7556e-67	166.9	166.9	101.2	1	110.985	1.16467e-21	110.98	1	107.609	2.0469e-21	107.61	1	166.904	6.7556e-67	166.9	1	101.203	1.47294e-22	112.36	1	135.466	4.17083e-35	135.47	1	76.588	8.71154e-17
Q5U5Q3	RNA-binding E3 ubiquitin-protein ligase MEX3C	MEX3C	309	1.7002	1.3972	1.183	1.2665	1.25	1.3292	0.72895	0.58773	1.3952	1.5059	Q5U5Q3	309	Q5U5Q3	Q5U5Q3	RNA-binding E3 ubiquitin-protein ligase MEX3C	MEX3C	sp|Q5U5Q3|MEX3C_HUMAN RNA-binding E3 ubiquitin-protein ligase MEX3C OS=Homo sapiens OX=9606 GN=MEX3C PE=1 SV=3	1	79.4454	2.00652e-76	166.49	166.49	79.445	1	112.878	8.88451e-30	112.88	1	131.771	6.81181e-43	131.77	1	166.489	2.00652e-76	166.49	1	79.4454	7.09816e-13	79.445	1	115.504	5.51424e-35	115.5	1	74.5842	1.68278e-12
P27816	Microtubule-associated protein 4	MAP4	986	1.6982	1.7796	1.4115	1.3626	1.2542		1.4511	1.5587			P27816	986	P27816	P27816	Microtubule-associated protein 4	MAP4	sp|P27816|MAP4_HUMAN Microtubule-associated protein 4 OS=Homo sapiens OX=9606 GN=MAP4 PE=1 SV=3	0.985512	18.3265	1.76427e-05	75.462	75.462	75.462	0.883912	8.8162	0.0136129	27.649	0.964714	14.368	1.8672e-05	74.769	0.953022	13.0721	0.000308629	55.841					0.851538	7.5859	0.000331601	55.213	0.910091	10.0528	0.000697746
P30305	M-phase inducer phosphatase 2	CDC25B	452	1.6966	1.0156	1.7666				0.54177		1.1482	1.1017	P30305	452	P30305	P30305	M-phase inducer phosphatase 2	CDC25B	sp|P30305|MPIP2_HUMAN M-phase inducer phosphatase 2 OS=Homo sapiens OX=9606 GN=CDC25B PE=1 SV=2	1	57.9891	2.10433e-08	135.09	135.09	57.989	1	50.4245	2.26513e-05	50.425													1	40.9677	0.000206468	40.968
Q9BQE4	Selenoprotein S	VIMP	88	1.3627	1.7622		1.5175	1.0191		1.2362				Q9BQE4	88	Q9BQE4	Q9BQE4	Selenoprotein S	VIMP	sp|Q9BQE4|SELS_HUMAN Selenoprotein S OS=Homo sapiens OX=9606 GN=SELENOS PE=1 SV=3	0.998889	29.5364	0.00942773	34.338	27.136	34.338					0.968685	14.9043	0.0508717	19.706	0.998889	29.5364	0.00942773	34.338					0.996014	23.9776	0.0149953	28.779
Q96PK6	RNA-binding protein 14	RBM14	149	1.6946										Q96PK6	149	Q96PK6	Q96PK6	RNA-binding protein 14	RBM14	sp|Q96PK6|RBM14_HUMAN RNA-binding protein 14 OS=Homo sapiens OX=9606 GN=RBM14 PE=1 SV=2	0.835311	7.05184	0.00373271	71.349	59.501	71.349
P35637	RNA-binding protein FUS	FUS	334	1.3233	1.7595	0.66163								P35637	334	P35637	P35637	RNA-binding protein FUS	FUS	sp|P35637|FUS_HUMAN RNA-binding protein FUS OS=Homo sapiens OX=9606 GN=FUS PE=1 SV=1	0.999437	32.4928	0.00307225	35.64	27.93	35.64	0.943085	12.1932	0.0659683	15.254
Q9Y376	Calcium-binding protein 39	CAB39	301		1.7593	1.224	1.615	1.7157		1.2727	0.91959			Q9Y376	301	Q9Y376	Q9Y376	Calcium-binding protein 39	CAB39	sp|Q9Y376|CAB39_HUMAN Calcium-binding protein 39 OS=Homo sapiens OX=9606 GN=CAB39 PE=1 SV=1	0.580536	1.41134	0.000105542	68.277	61.396	65.805	0.564315	1.12348	0.0015819	47.532	0.573993	1.2949	0.000478275	57.136	0.577145	1.35093	0.000391038	58.487					0.580536	1.41134	0.000141291	65.805	0.577145	1.35093	0.00265981
Q8WU90	Zinc finger CCCH domain-containing protein 15	ZC3H15	86	1.6934	1.7422	1.6516	1.6656	1.2137		0.86608	0.76078			Q8WU90	86	Q8WU90	Q8WU90	Zinc finger CCCH domain-containing protein 15	ZC3H15	sp|Q8WU90|ZC3HF_HUMAN Zinc finger CCCH domain-containing protein 15 OS=Homo sapiens OX=9606 GN=ZC3H15 PE=1 SV=1	0.999271	31.3675	3.66606e-08	91.076	91.076	91.076	0.975433	15.9884	0.0132136	26.365	0.990629	20.2413	1.12082e-05	64.04	0.996576	24.6401	1.41381e-05	61.732					0.953961	13.164	0.000223743	48.823	0.896251	9.36444	0.00271347
O14757	Serine/threonine-protein kinase Chk1	CHEK1	53	1.693	1.4978	1.634	1.741	1.634	2.078	0.66872	0.84504			O14757	53	O14757	O14757	Serine/threonine-protein kinase Chk1	CHEK1	sp|O14757|CHK1_HUMAN Serine/threonine-protein kinase Chk1 OS=Homo sapiens OX=9606 GN=CHEK1 PE=1 SV=2	0.850379	7.54619	0.000560063	78.098	78.098	78.098	0.824438	6.71727	0.00291884	53.124	0.807057	6.21476	0.00297956	52.549	0.81593	6.46669	0.00177805	63.734	0.850379	7.54619	0.000560063	78.098	0.805684	6.17656	0.00174043	64.064	0.5	0	0.00215015
Q13283	Ras GTPase-activating protein-binding protein 1	G3BP1	287	1.6921			1.0139	1.2422		0.64307				Q13283	287	Q13283	Q13283	Ras GTPase-activating protein-binding protein 1	G3BP1	sp|Q13283|G3BP1_HUMAN Ras GTPase-activating protein-binding protein 1 OS=Homo sapiens OX=9606 GN=G3BP1 PE=1 SV=1	1	27.081	0.00233429	40.012	24.506	27.081					1	27.081	0.031153	27.61	1	40.0117	0.00233429	40.012					1	38.9328	0.00391968	38.933
Q92616	Translational activator GCN1	GCN1L1	2183	1.692	1.848	1.9405	1.8838			0.87106	0.78203			Q92616	2183	Q92616	Q92616	Translational activator GCN1	GCN1L1	sp|Q92616|GCN1_HUMAN eIF-2-alpha kinase activator GCN1 OS=Homo sapiens OX=9606 GN=GCN1 PE=1 SV=6	1	38.021	0.000812159	75.416	75.416	38.021	1	41.1636	0.00165935	67.214	1	55.4006	0.00321649	55.401									1	49.5005	0.00427851	49.5	1	38.021	0.0108128
Q96GQ7	Probable ATP-dependent RNA helicase DDX27	DDX27	758	1.4606	1.7521									Q96GQ7	758	Q96GQ7	Q96GQ7	Probable ATP-dependent RNA helicase DDX27	DDX27	sp|Q96GQ7|DDX27_HUMAN Probable ATP-dependent RNA helicase DDX27 OS=Homo sapiens OX=9606 GN=DDX27 PE=1 SV=2	0.527874	0.484717	0.00162542	48.625	30.61	48.625
Q92667	A-kinase anchor protein 1, mitochondrial	AKAP1	55		1.7512			1.2565		1.0985	0.85929			Q92667	55	Q92667	Q92667	A-kinase anchor protein 1, mitochondrial	AKAP1	sp|Q92667|AKAP1_HUMAN A-kinase anchor protein 1, mitochondrial OS=Homo sapiens OX=9606 GN=AKAP1 PE=1 SV=1	0.989718	19.8345	0.012984	26.437	15.952	26.437									0.989718	19.8345	0.012984	26.437					0.957156	13.491	0.0388206	18.296	0.886726	8.93661	0.0730836
Q9NUQ9	Protein FAM49B	FAM49B	146	1.6913	1.5131	1.2537	1.1221	1.5181		1.0177		0.72801	0.64247	Q9NUQ9	146	Q9NUQ9	Q9NUQ9	Protein FAM49B	FAM49B	sp|Q9NUQ9|FA49B_HUMAN Protein FAM49B OS=Homo sapiens OX=9606 GN=FAM49B PE=1 SV=1	1	31.1112	1.74531e-16	105.38	105.38	31.111	1	105.377	1.74531e-16	105.38	1	69.1479	1.93618e-07	69.148	1	64.8301	4.59725e-07	64.83					1	64.1996	4.98582e-07	64.2	1	31.1112	0.00268663
P53990	IST1 homolog	IST1	48	1.6912	1.1523	1.8159	1.0533	0.86723	0.64947	1.0028	1.0492	1.5249	1.4041	P53990	48	P53990	P53990	IST1 homolog	IST1	sp|P53990|IST1_HUMAN IST1 homolog OS=Homo sapiens OX=9606 GN=IST1 PE=1 SV=1	1	34.0938	0.000149343	99.283	54.973	34.094	0.999989	49.763	0.0103402	51.888	1	48.8228	0.000820747	54.501	1	90.0503	0.000213954	90.05	1	39.509	0.0199984	39.509	1	99.2826	0.000252131	99.283	1	61.6572	0.00055446
O43175	D-3-phosphoglycerate dehydrogenase	PHGDH	58	1.6903	1.5187	0.95313	1.4928	1.2871	1.1244	1.1505	0.99422	0.8159	1.0601	O43175	58	O43175	O43175	D-3-phosphoglycerate dehydrogenase	PHGDH	sp|O43175|SERA_HUMAN D-3-phosphoglycerate dehydrogenase OS=Homo sapiens OX=9606 GN=PHGDH PE=1 SV=4	1	103.336	7.51384e-16	139.78	121.02	119.47	1	100.681	1.95769e-11	113.47	1	103.336	7.51384e-16	119.47	1	98.6355	6.23036e-13	115.38	1	83.5898	8.7942e-11	106.6	1	83.8934	1.50674e-07	95.662	1	86.739	1.02874e-07
P12956	X-ray repair cross-complementing protein 6	XRCC6	451	1.69		1.2299	1.7481	0.96889		0.66453	1.6816		2.7655	P12956	451	P12956	P12956	X-ray repair cross-complementing protein 6	XRCC6	sp|P12956|XRCC6_HUMAN X-ray repair cross-complementing protein 6 OS=Homo sapiens OX=9606 GN=XRCC6 PE=1 SV=2	1	71.5037	6.78587e-05	86.777	86.777	86.777	0.997988	26.9544	0.0412503	29.099	0.999786	36.7028	0.00819638	41.202	0.999999	61.6169	0.000544889	66.826					0.998949	29.7779	0.00446537	32.926	0.998054	27.1002	0.0113632
O95864	Fatty acid desaturase 2	FADS2	409	1.4292	1.7443			0.50395		1.1162				O95864	409	O95864	O95864	Fatty acid desaturase 2	FADS2	sp|O95864|FADS2_HUMAN Fatty acid desaturase 2 OS=Homo sapiens OX=9606 GN=FADS2 PE=1 SV=1	0.950695	12.8515	0.00195736	37.645	22.223	37.645									0.950695	12.8515	0.0202873	37.645					0.931255	11.3183	0.00195736	36.112
Q8IYB3	Serine/arginine repetitive matrix protein 1	SRRM1	140		1.7443		1.329			0.98043				Q8IYB3	140	Q8IYB3	Q8IYB3	Serine/arginine repetitive matrix protein 1	SRRM1	sp|Q8IYB3|SRRM1_HUMAN Serine/arginine repetitive matrix protein 1 OS=Homo sapiens OX=9606 GN=SRRM1 PE=1 SV=2	0.987974	19.1464	0.0165999	31.068	15.178	27.554					0.987974	19.1464	0.0246149	27.554									0.987593	19.009	0.0165999	31.068
P10809	60 kDa heat shock protein, mitochondrial	HSPD1	249	2.7188	1.7441	0.9004	2.9658	1.524		1.3303				P10809	249	P10809	P10809	60 kDa heat shock protein, mitochondrial	HSPD1	sp|P10809|CH60_HUMAN 60 kDa heat shock protein, mitochondrial OS=Homo sapiens OX=9606 GN=HSPD1 PE=1 SV=2	0.54165	0.72522	0.000167782	61.641	61.641	51.03	0.5	0	0.000539925	54.501	0.523976	0.416834	0.0170001	26.781	0.5	0	0.00522867	41.542					0.5	0	0.00268489	40.237
O95478	Ribosome biogenesis protein NSA2 homolog	NSA2	189	1.6889	2.1324	2.5225	2.2522	1.8951		1.0121				O95478	189	O95478	O95478	Ribosome biogenesis protein NSA2 homolog	NSA2	sp|O95478|NSA2_HUMAN Ribosome biogenesis protein NSA2 homolog OS=Homo sapiens OX=9606 GN=NSA2 PE=1 SV=1	1	70.1908	1.03082e-09	78.661	78.661	78.661	0.999999	60.2421	7.67495e-08	69.081	0.999993	51.7251	1.54836e-06	60.564	1	70.1908	1.03082e-09	78.661					0.99999	49.9086	9.8539e-06	55.437
Q86Y07	Serine/threonine-protein kinase VRK2	VRK2	419		1.7426									Q86Y07	419	Q86Y07	Q86Y07	Serine/threonine-protein kinase VRK2	VRK2	sp|Q86Y07|VRK2_HUMAN Serine/threonine-protein kinase VRK2 OS=Homo sapiens OX=9606 GN=VRK2 PE=1 SV=3	0.974882	15.8896	0.0029933	19.203	19.203	19.203					0.810938	5.4277	0.0510486	6.3983
P25398	40S ribosomal protein S12	RPS12	78	1.6888	1.1023	1.181	1.0625	1.3659	1.2726	0.89649	1.061			P25398	78	P25398	P25398	40S ribosomal protein S12	RPS12	sp|P25398|RS12_HUMAN 40S ribosomal protein S12 OS=Homo sapiens OX=9606 GN=RPS12 PE=1 SV=3	0.998404	27.9627	8.19767e-87	206.71	187.68	206.71	0.976889	16.2603	1.71228e-22	120.11	0.984407	20.6914	3.9569e-18	111.18	0.98266	17.5335	5.92319e-60	175.32	0.798199	5.97187	0.0175952	22.902	0.998404	27.9627	8.19767e-87	206.71	0.981443	17.2337	2.54401e-13
Q99536	Synaptic vesicle membrane protein VAT-1 homolog	VAT1	372	1.6877	1.6947	1.4945	1.4267	1.6883	2.0798	1.3229	1.188	0.70069	0.70722	Q99536	372	Q99536	Q99536	Synaptic vesicle membrane protein VAT-1 homolog	VAT1	sp|Q99536|VAT1_HUMAN Synaptic vesicle membrane protein VAT-1 homolog OS=Homo sapiens OX=9606 GN=VAT1 PE=1 SV=2	1	146.813	2.66953e-141	269.33	218.53	269.33	1	132.4	8.30628e-121	256.48	1	119.898	2.33737e-70	228.64	1	146.813	2.66953e-141	269.33	1	130.513	2.61892e-70	227.94	1	127.054	2.25065e-85	236.77	1	97.0784	1.61245e-35
Q7LBC6	Lysine-specific demethylase 3B	KDM3B	1249	1.6865	0.66311	0.86041	0.74725	0.894		0.98462				Q7LBC6	1249	Q7LBC6	Q7LBC6	Lysine-specific demethylase 3B	KDM3B	sp|Q7LBC6|KDM3B_HUMAN Lysine-specific demethylase 3B OS=Homo sapiens OX=9606 GN=KDM3B PE=1 SV=2	0.999827	37.6113	8.97709e-16	88.036	88.036	88.036	0.988845	19.4767	6.21601e-06	55.588	0.999737	35.8062	2.62787e-08	65.25	0.99854	28.3502	4.50112e-09	70.99					0.999827	37.6113	8.97709e-16	88.036
Q6Q0C0	E3 ubiquitin-protein ligase TRAF7	TRAF7	252	1.6857	1.4262	1.1058	2.42							Q6Q0C0	252	Q6Q0C0	Q6Q0C0	E3 ubiquitin-protein ligase TRAF7	TRAF7	sp|Q6Q0C0|TRAF7_HUMAN E3 ubiquitin-protein ligase TRAF7 OS=Homo sapiens OX=9606 GN=TRAF7 PE=1 SV=1	0.997679	26.333	1.21534e-05	84.753	84.753	76.262	0.997679	26.333	3.19848e-05	76.262	0.970444	15.1633	0.000134487	65.092
Q15717	ELAV-like protein 1	ELAVL1	104	1.6838	1.5817	2.0187	1.7307	1.3809		1.3323			0.86771	Q15717	104	Q15717	Q15717	ELAV-like protein 1	ELAVL1	sp|Q15717|ELAV1_HUMAN ELAV-like protein 1 OS=Homo sapiens OX=9606 GN=ELAVL1 PE=1 SV=2	1	63.337	2.94613e-19	120.24	110.83	63.337	1	34.7212	7.28094e-08	74.519	1	63.337	2.94613e-19	120.24	1	71.2626	2.72432e-07	71.263					1	106.929	6.46972e-14	106.93
Q14690	Protein RRP5 homolog	PDCD11	43	1.6833	2.064	1.6222	1.7834	1.1766	1.2125	1.0608	1.1403			Q14690	43	Q14690	Q14690	Protein RRP5 homolog	PDCD11	sp|Q14690|RRP5_HUMAN Protein RRP5 homolog OS=Homo sapiens OX=9606 GN=PDCD11 PE=1 SV=3	1	81.3731	1.21566e-44	137.45	137.45	81.373	1	134.151	4.62134e-36	134.15	1	114.63	1.29459e-23	114.63	1	116.936	3.58406e-28	116.94	1	81.3731	5.29853e-13	81.373	1	109.048	1.01929e-22	109.05	1	137.451	1.21566e-44
P63244	Guanine nucleotide-binding protein subunit beta-2-like 1;Guanine nucleotide-binding protein subunit beta-2-like 1, N-terminally processed	GNB2L1	12	1.679	0.93452	0.87692	0.90647	0.83357		0.60473	0.30231	1.3338	1.0355	P63244	12	P63244	P63244	Guanine nucleotide-binding protein subunit beta-2-like 1;Guanine nucleotide-binding protein subunit beta-2-like 1, N-terminally processed	GNB2L1	sp|P63244|RACK1_HUMAN Receptor of activated protein C kinase 1 OS=Homo sapiens OX=9606 GN=RACK1 PE=1 SV=3	1	26.4219	2.03701e-37	106.04	95.038	26.422	1	89.0387	4.45819e-20	89.039	1	79.3954	5.78698e-14	79.395	1	106.042	2.03701e-37	106.04					1	104.298	3.04581e-29	104.3	1	26.4219	0.00193142
P19338	Nucleolin	NCL	577	1.6781	1.2701	1.2766	1.0892	1.3007	1.452	1.2189	1.1824	0.63516	0.63731	P19338	577	P19338	P19338	Nucleolin	NCL	sp|P19338|NUCL_HUMAN Nucleolin OS=Homo sapiens OX=9606 GN=NCL PE=1 SV=3	1	102.739	9.82007e-39	157.52	157.52	157.52	1	102.739	9.82007e-39	157.52	1	73.2759	4.86667e-18	121.28	1	95.9719	2.65957e-33	143.98	0.999976	46.1912	5.03418e-08	89.982	1	86.7598	4.31666e-33	141.54	1	77.294	2.24815e-18
Q14669	E3 ubiquitin-protein ligase TRIP12	TRIP12	123	1.677	1.8843	1.8348								Q14669	123	Q14669	Q14669	E3 ubiquitin-protein ligase TRIP12	TRIP12	sp|Q14669|TRIPC_HUMAN E3 ubiquitin-protein ligase TRIP12 OS=Homo sapiens OX=9606 GN=TRIP12 PE=1 SV=1	0.996142	24.1196	5.78263e-07	69.737	55.696	69.737	0.986738	18.7161	0.041437	31.753
Q9NX40	OCIA domain-containing protein 1	OCIAD1	217	1.6768	1.281	1.2169								Q9NX40	217	Q9NX40	Q9NX40	OCIA domain-containing protein 1	OCIAD1	sp|Q9NX40|OCAD1_HUMAN OCIA domain-containing protein 1 OS=Homo sapiens OX=9606 GN=OCIAD1 PE=1 SV=1	1	27.9038	2.71124e-05	49.528	49.528	27.904	1	13.3205	0.0662859	13.321
Q9Y4C1	Lysine-specific demethylase 3A	KDM3A	918	1.6752	1.508	1.8119	1.4467	1.2229	1.3412	0.96941	1.1062			Q9Y4C1	918	Q9Y4C1	Q9Y4C1	Lysine-specific demethylase 3A	KDM3A	sp|Q9Y4C1|KDM3A_HUMAN Lysine-specific demethylase 3A OS=Homo sapiens OX=9606 GN=KDM3A PE=1 SV=4	0.999985	48.1132	1.24078e-76	200.26	175.97	163.45	0.99949	32.9197	2.28313e-38	138.3	0.999985	48.1132	2.24591e-54	163.45	0.999781	36.5975	1.24078e-76	200.26	0.992539	21.2397	2.15447e-22	118.52	0.999624	34.2449	2.66842e-71	180.83	0.998681	28.7929	1.7377e-23
P27695	DNA-(apurinic or apyrimidinic site) lyase;DNA-(apurinic or apyrimidinic site) lyase, mitochondrial	APEX1	24	1.4447	1.7351		1.3281			0.76702				P27695	24	P27695	P27695	DNA-(apurinic or apyrimidinic site) lyase;DNA-(apurinic or apyrimidinic site) lyase, mitochondrial	APEX1	sp|P27695|APEX1_HUMAN DNA-(apurinic or apyrimidinic site) lyase OS=Homo sapiens OX=9606 GN=APEX1 PE=1 SV=2	0.5	0	0.00520414	41.202	31.672	28.472					0.5	0	0.00669798	28.472									0.5	0	0.0146205	41.202
P27695	DNA-(apurinic or apyrimidinic site) lyase;DNA-(apurinic or apyrimidinic site) lyase, mitochondrial	APEX1	25	1.2421	1.7351		1.3281			0.76702				P27695	25	P27695	P27695	DNA-(apurinic or apyrimidinic site) lyase;DNA-(apurinic or apyrimidinic site) lyase, mitochondrial	APEX1	sp|P27695|APEX1_HUMAN DNA-(apurinic or apyrimidinic site) lyase OS=Homo sapiens OX=9606 GN=APEX1 PE=1 SV=2	0.515028	0.26114	0.00520414	41.202	31.672	19.553					0.5	0	0.00669798	28.472									0.5	0	0.0146205	41.202
P06703	Protein S100-A6	S100A6	40	1.6746	0.40935	0.90397	1.0473	1.2614	1.0294	1.6525	0.54377	1.2969	1.3058	P06703	40	P06703	P06703	Protein S100-A6	S100A6	sp|P06703|S10A6_HUMAN Protein S100-A6 OS=Homo sapiens OX=9606 GN=S100A6 PE=1 SV=1	1	110.769	1.89344e-91	228.93	146.29	110.77	1	56.7186	3.79847e-47	211.63	1	128.322	1.7601e-50	170.04	1	140.969	9.46066e-49	183.94	1	110.769	4.25262e-17	110.77	1	141.31	1.89344e-91	228.93	1	161.508	3.84531e-54
Q7Z333	Probable helicase senataxin	SETX	1374	1.6719	2.3311	2.4064		1.6821		1.2537				Q7Z333	1374	Q7Z333	Q7Z333	Probable helicase senataxin	SETX	sp|Q7Z333|SETX_HUMAN Probable helicase senataxin OS=Homo sapiens OX=9606 GN=SETX PE=1 SV=4	1	22.5778	0.00038549	74.944	66.84	22.578	1	14.8996	0.0713195	14.9					1	70.4884	0.000664424	70.488					1	45.653	0.00392824	45.653
Q86UV5	Ubiquitin carboxyl-terminal hydrolase 48	USP48	587	1.6658	2.2871	2.1642	1.9014	2.51	1.4493	0.71246				Q86UV5	587	Q86UV5	Q86UV5	Ubiquitin carboxyl-terminal hydrolase 48	USP48	sp|Q86UV5|UBP48_HUMAN Ubiquitin carboxyl-terminal hydrolase 48 OS=Homo sapiens OX=9606 GN=USP48 PE=1 SV=1	1	79.4769	3.85655e-07	101.53	80.947	101.53	1	79.4769	3.85655e-07	101.53	0.999999	62.2089	9.60863e-06	90.412	1	71.9598	1.14048e-06	95.428	0.999753	36.0742	0.0166886	43.308	0.999999	60.0135	0.000112786	72.891
Q9H1V8	Sodium-dependent neutral amino acid transporter SLC6A17	SLC6A17	679	1.6646	2.4918	1.6654	1.4317	1.6111		2.2456		0.76281	0.89165	Q9H1V8	679	Q9H1V8	Q9H1V8	Sodium-dependent neutral amino acid transporter SLC6A17	SLC6A17	sp|Q9H1V8|S6A17_HUMAN Sodium-dependent neutral amino acid transporter SLC6A17 OS=Homo sapiens OX=9606 GN=SLC6A17 PE=1 SV=3	1	102.776	3.87716e-11	102.78	84.385	102.78	1	61.6483	2.19995e-06	61.648	1	102.776	3.87716e-11	102.78	1	82.0066	1.95624e-08	82.007					1	82.0066	1.95624e-08	82.007
Q8ND82	Zinc finger protein 280C	ZNF280C	522	1.664	1.0387	1.0297	1.0829	0.76736		0.83407				Q8ND82	522	Q8ND82	Q8ND82	Zinc finger protein 280C	ZNF280C	sp|Q8ND82|Z280C_HUMAN Zinc finger protein 280C OS=Homo sapiens OX=9606 GN=ZNF280C PE=1 SV=1	1	15.2207	6.19809e-09	48.085	48.085	15.221	1	48.0847	6.19809e-09	48.085	1	15.2207	1.42219e-08	44.903	1	35.2288	1.78142e-08	43.478					1	44.1067	1.62288e-08	44.107
Q86UE4	Protein LYRIC	MTDH	314		1.7312	1.864								Q86UE4	314	Q86UE4	Q86UE4	Protein LYRIC	MTDH	sp|Q86UE4|LYRIC_HUMAN Protein LYRIC OS=Homo sapiens OX=9606 GN=MTDH PE=1 SV=2	1	26.1118	0.0233107	28.789	28.789	26.112	1	28.7894	0.0634027	28.789
P08651	Nuclear factor 1 C-type	NFIC	99		1.7261		1.9397							P08651	99	P08651	P08651	Nuclear factor 1 C-type	NFIC	sp|P08651|NFIC_HUMAN Nuclear factor 1 C-type OS=Homo sapiens OX=9606 GN=NFIC PE=1 SV=2	0.748369	4.73351	0.00498279	42.061	3.961	42.061					0.748369	4.73351	0.00498279	42.061
P08651	Nuclear factor 1 C-type	NFIC	100		1.7261	1.9146								P08651	100	P08651	P08651	Nuclear factor 1 C-type	NFIC	sp|P08651|NFIC_HUMAN Nuclear factor 1 C-type OS=Homo sapiens OX=9606 GN=NFIC PE=1 SV=2	0.530751	0.534873	0.015449	29.341	5.5867	29.341	0.530751	0.534873	0.015449	29.341
P98196	Probable phospholipid-transporting ATPase IH	ATP11A	590	1.6632	1.0292	1.1846	1.2103	1.4771	0.97367	1.341	1.4159	1.2643	1.3345	P98196	590	P98196	P98196	Probable phospholipid-transporting ATPase IH	ATP11A	sp|P98196|AT11A_HUMAN Probable phospholipid-transporting ATPase IH OS=Homo sapiens OX=9606 GN=ATP11A PE=1 SV=3	1	40.5891	1.91828e-05	114.84	68.246	40.589	1	91.8667	0.00136103	91.867	1	111.607	7.72651e-05	111.61	1	95.5016	0.00100938	95.502	1	40.5891	0.00808987	40.589	1	114.841	1.91828e-05	114.84	1	87.3076	0.00183514
P05204	Non-histone chromosomal protein HMG-17	HMGN2	40		1.723		1.048				0.92059			P05204	40	P05204	P05204	Non-histone chromosomal protein HMG-17	HMGN2	sp|P05204|HMGN2_HUMAN Non-histone chromosomal protein HMG-17 OS=Homo sapiens OX=9606 GN=HMGN2 PE=1 SV=3	0.870129	8.97111	0.00853109	39.917	39.917	27.335					0.679195	3.75062	0.0240346	29.341													0.870129	8.97111	0.0666543
P46776	60S ribosomal protein L27a	RPL27A	94	1.663	1.4356	0.95892	1.0923			0.94679	1.2524	0.90021	0.90837	P46776	94	P46776	P46776	60S ribosomal protein L27a	RPL27A	sp|P46776|RL27A_HUMAN 60S ribosomal protein L27a OS=Homo sapiens OX=9606 GN=RPL27A PE=1 SV=2	1	33.6669	4.16015e-18	126.56	102.06	33.667	1	23.1724	0.0169971	59.198	1	33.6669	0.00271518	45.864									1	117.258	4.16015e-18	117.26	1	51.0918	0.00137893
Q14258	E3 ubiquitin/ISG15 ligase TRIM25	TRIM25	273	1.6627	1.1317	1.0454	1.2384	1.0069		1.1488				Q14258	273	Q14258	Q14258	E3 ubiquitin/ISG15 ligase TRIM25	TRIM25	sp|Q14258|TRI25_HUMAN E3 ubiquitin/ISG15 ligase TRIM25 OS=Homo sapiens OX=9606 GN=TRIM25 PE=1 SV=2	1	102.276	1.51726e-10	112.15	95.894	108.71	1	95.8938	4.05909e-10	112.15	1	102.276	1.51726e-10	108.71	1	87.4208	2.99902e-06	91.812					1	88.375	3.98972e-07	94.09
P10809	60 kDa heat shock protein, mitochondrial	HSPD1	87	1.6618		1.5621						0.98941		P10809	87	P10809	P10809	60 kDa heat shock protein, mitochondrial	HSPD1	sp|P10809|CH60_HUMAN 60 kDa heat shock protein, mitochondrial OS=Homo sapiens OX=9606 GN=HSPD1 PE=1 SV=2	0.965019	15.2344	0.00626441	64.297	32.663	52.579	0.757875	7.41743	0.025603	34.532
P41208	Centrin-2;Centrin-1	CETN2;CETN1	124;124	1.6603	1.7773	2.6329	2.4332	2.2715		0.90918	1.2249	1.3987		P41208;Q12798	124;124	P41208;Q12798	P41208	Centrin-2;Centrin-1	CETN2;CETN1	sp|P41208|CETN2_HUMAN Centrin-2 OS=Homo sapiens OX=9606 GN=CETN2 PE=1 SV=1;sp|Q12798|CETN1_HUMAN Centrin-1 OS=Homo sapiens OX=9606 GN=CETN1 PE=1 SV=1	0.999953	43.2696	3.48383e-05	120.9	53.137	104.76	0.994403	22.4961	0.0411107	70.67	0.999473	32.7817	0.0303996	100.67	0.999938	42.076	0.0306508	114.43					0.999917	40.8017	0.00622452	102.3	0.999591	33.8782	0.0332222
Q14152	Eukaryotic translation initiation factor 3 subunit A	EIF3A	75	1.6594		0.86337	1.4176	1.458				1.5993		Q14152	75	Q14152	Q14152	Eukaryotic translation initiation factor 3 subunit A	EIF3A	sp|Q14152|EIF3A_HUMAN Eukaryotic translation initiation factor 3 subunit A OS=Homo sapiens OX=9606 GN=EIF3A PE=1 SV=1	0.999996	54.4608	1.09561e-05	94.09	74.27	94.09	0.997711	26.3944	0.0157184	37.77	0.993529	21.8618	0.0118457	39.143	0.991625	20.7335	0.0197477	24.954
Q1KMD3	Heterogeneous nuclear ribonucleoprotein U-like protein 2	HNRNPUL2;HNRNPUL2-BSCL2	601;601	1.6592	1.1194	1.3029	1.3797	1.2789	1.6751	1.0765	1.264			Q1KMD3;H3BQZ7	601;601	Q1KMD3	Q1KMD3	Heterogeneous nuclear ribonucleoprotein U-like protein 2	HNRNPUL2;HNRNPUL2-BSCL2	sp|Q1KMD3|HNRL2_HUMAN Heterogeneous nuclear ribonucleoprotein U-like protein 2 OS=Homo sapiens OX=9606 GN=HNRNPUL2 PE=1 SV=1;tr|H3BQZ7|H3BQZ7_HUMAN HCG2044799 OS=Homo sapiens OX=9606 GN=HNRNPUL2-BSCL2 PE=4 SV=1	1	89.5211	3.64546e-89	168.22	168.22	136.63	1	80.272	2.22635e-40	112.35	1	74.5498	3.64546e-89	168.22	1	89.5211	1.01954e-55	136.63	0.999911	40.7443	1.20448e-11	68.43	0.999187	31.4329	2.44986e-08	50.757	0.999992	51.7038	6.36281e-16
REV__Q96PY6					1.7149		2.7635			3.0807						REV__Q96PY6	REV__Q96PY6				1	28.2056	0.0158896	29.544	9.8852	28.206					1	28.2056	0.0194168	28.206									1	29.5438	0.0158896	29.544
P28702	Retinoic acid receptor RXR-beta	RXRB	202	1.6575	1.1256	1.2977	1.6108	2.4756		1.0148				P28702	202	P28702	P28702	Retinoic acid receptor RXR-beta	RXRB	sp|P28702|RXRB_HUMAN Retinoic acid receptor RXR-beta OS=Homo sapiens OX=9606 GN=RXRB PE=1 SV=2	1	46.9641	0.000384834	46.964	42.648	46.964	1	31.8272	0.00410637	31.827	1	46.9641	0.000384834	46.964	1	22.8027	0.0217955	22.803					1	22.8027	0.0217955	22.803
P23396	40S ribosomal protein S3	RPS3	132	1.6571	1.5428		1.4102	1.1183	1.6065	0.76872	1.3405			P23396	132	P23396	P23396	40S ribosomal protein S3	RPS3	sp|P23396|RS3_HUMAN 40S ribosomal protein S3 OS=Homo sapiens OX=9606 GN=RPS3 PE=1 SV=2	0.999999	60.4478	3.45065e-13	111.33	103.15	105.89					0.999998	58.1559	3.45065e-13	111.33	0.999972	45.5147	4.19362e-08	90.654	0.980058	16.9147	0.000705045	41.202	0.999995	53.0483	2.44546e-09	94.01	0.998693	28.8328	0.000281764
P11387	DNA topoisomerase 1	TOP1	354	1.6566	1.5141	1.6458	1.5482	1.6593	2.2447	1.7437	2.2558	0.99002	0.93503	P11387	354	P11387	P11387	DNA topoisomerase 1	TOP1	sp|P11387|TOP1_HUMAN DNA topoisomerase 1 OS=Homo sapiens OX=9606 GN=TOP1 PE=1 SV=2	1	78.763	5.14507e-05	84.169	62.559	78.763	1	77.1846	7.66073e-05	77.185	1	73.4663	0.000107939	73.466	1	59.8981	0.00287626	59.898	1	78.763	6.33063e-05	78.763	1	79.492	5.71636e-05	79.492	1	80.1699	5.14507e-05
Q8N5G2	Macoilin	TMEM57	296	1.6559	1.4446	2.2505	2.3139	1.2307		0.79416	0.84772			Q8N5G2	296	Q8N5G2	Q8N5G2	Macoilin	TMEM57	sp|Q8N5G2|MACOI_HUMAN Macoilin OS=Homo sapiens OX=9606 GN=MACO1 PE=1 SV=1	1	21.458	1.86823e-27	144.68	120.67	21.458	1	67.6459	3.29542e-27	142.1	1	69.5939	0.000598933	69.594	1	133.66	1.23516e-22	133.66					1	41.9124	0.00798307	41.912	1	21.458	0.0298286
Q6P2E9	Enhancer of mRNA-decapping protein 4	EDC4	1157		1.711									Q6P2E9	1157	Q6P2E9	Q6P2E9	Enhancer of mRNA-decapping protein 4	EDC4	sp|Q6P2E9|EDC4_HUMAN Enhancer of mRNA-decapping protein 4 OS=Homo sapiens OX=9606 GN=EDC4 PE=1 SV=1	1	22.6457	0.0221921	22.646	22.646	22.646
P00390	Glutathione reductase, mitochondrial	GSR	111	0.98672	1.7103	1.1887				1.4069	1.4562			P00390	111	P00390	P00390	Glutathione reductase, mitochondrial	GSR	sp|P00390|GSHR_HUMAN Glutathione reductase, mitochondrial OS=Homo sapiens OX=9606 GN=GSR PE=1 SV=2	0.557443	1.00231	0.000520018	54.871	47.146	54.871	0.5	0	0.00400858	37.954													0.522209	0.386071	0.0198267	37.156	0.522221	0.386269	0.0591145
P46937	Transcriptional coactivator YAP1	YAP1	342	1.6549		1.5439	0.51231		0.52423		0.75038	0.66636		P46937	342	P46937	P46937	Transcriptional coactivator YAP1	YAP1	sp|P46937|YAP1_HUMAN Transcriptional coactivator YAP1 OS=Homo sapiens OX=9606 GN=YAP1 PE=1 SV=2	1	32.1808	3.87716e-11	102.78	86.47	32.181	1	46.1589	0.000248332	46.159	1	53.779	0.000627249	53.779	1	29.6029	0.0358449	29.603	1	32.1808	0.0286491	32.181					1	102.776	3.87716e-11
P16989	Y-box-binding protein 3	YBX3	311	1.6539	1.4576	1.6115	1.471	1.1745	1.3574	1.1961	1.17	0.98974		P16989	311	P16989	P16989	Y-box-binding protein 3	YBX3	sp|P16989|YBOX3_HUMAN Y-box-binding protein 3 OS=Homo sapiens OX=9606 GN=YBX3 PE=1 SV=4	1	143.885	4.81841e-196	256.12	256.12	143.89	1	92.819	6.47567e-43	127.28	1	143.885	5.24244e-88	178.53	1	114.912	2.3621e-104	198.39	1	94.5417	4.81841e-196	256.12	1	76.198	1.31177e-115	210.88	1	50.8273	1.83017e-52
Q96KQ7	Histone-lysine N-methyltransferase EHMT2	EHMT2	1164	1.6528	2.2213	1.7448								Q96KQ7	1164	Q96KQ7	Q96KQ7	Histone-lysine N-methyltransferase EHMT2	EHMT2	sp|Q96KQ7|EHMT2_HUMAN Histone-lysine N-methyltransferase EHMT2 OS=Homo sapiens OX=9606 GN=EHMT2 PE=1 SV=3	0.999998	56.5691	0.00148492	56.569	56.569	56.569	0.987849	19.1009	0.0520705	20.236
P50990	T-complex protein 1 subunit theta	CCT8	254	1.6494		1.1684	1.108	1.1781				1.3534	1.4495	P50990	254	P50990	P50990	T-complex protein 1 subunit theta	CCT8	sp|P50990|TCPQ_HUMAN T-complex protein 1 subunit theta OS=Homo sapiens OX=9606 GN=CCT8 PE=1 SV=4	0.991462	20.649	9.58169e-24	119.06	98.057	76.704	0.84553	7.38286	2.40346e-16	91.319	0.975705	16.038	2.76769e-18	96.79	0.809392	6.28017	3.1685e-12	76.733
Q9Y6I3	Epsin-1	EPN1	97	1.6491		0.6082	1.7045							Q9Y6I3	97	Q9Y6I3	Q9Y6I3	Epsin-1	EPN1	sp|Q9Y6I3|EPN1_HUMAN Epsin-1 OS=Homo sapiens OX=9606 GN=EPN1 PE=1 SV=2	1	108.068	3.46606e-07	147.75	113.37	147.75	0.99942	32.3626	0.000723508	44.005	0.99932	31.6717	0.000956738	41.202
Q96T60	Bifunctional polynucleotide phosphatase/kinase;Polynucleotide 3'-phosphatase;Polynucleotide 5'-hydroxyl-kinase	PNKP	414	1.6487	1.4312	1.5491				1.3327			0.98068	Q96T60	414	Q96T60	Q96T60	Bifunctional polynucleotide phosphatase/kinase;Polynucleotide 3'-phosphatase;Polynucleotide 5'-hydroxyl-kinase	PNKP	sp|Q96T60|PNKP_HUMAN Bifunctional polynucleotide phosphatase/kinase OS=Homo sapiens OX=9606 GN=PNKP PE=1 SV=1	0.952914	13.0616	0.00194268	61.419	61.419	47.062	0.819264	6.5638	0.00194268	48.659													0.922863	10.7788	0.00300124	44.829
O75367	Core histone macro-H2A.1	H2AFY	235	1.6468	1.4482	1.6449	1.4044	1.4659	1.5717	1.2288	1.0798	0.65545	0.81636	O75367	235	O75367	O75367	Core histone macro-H2A.1	H2AFY	sp|O75367|H2AY_HUMAN Core histone macro-H2A.1 OS=Homo sapiens OX=9606 GN=H2AFY PE=1 SV=4	0.952422	13.0143	4.22302e-07	134.26	110.94	118.21	0.895953	9.35056	0.000198493	104.2	0.952422	13.0143	5.24439e-06	118.21	0.859544	7.86729	0.000133985	106.88	0.896755	9.38804	6.6096e-05	111.46	0.895678	9.33774	4.22302e-07	134.26	0.897465	9.42143	4.93753e-06
P26358	DNA (cytosine-5)-methyltransferase 1	DNMT1	1483	1.6467	1.4702	2.0974		1.5375	1.6343	1.0954	0.8975	1.1427	0.9229	P26358	1483	P26358	P26358	DNA (cytosine-5)-methyltransferase 1	DNMT1	sp|P26358|DNMT1_HUMAN DNA (cytosine-5)-methyltransferase 1 OS=Homo sapiens OX=9606 GN=DNMT1 PE=1 SV=2	1	80.7384	8.52006e-13	105.28	103.21	80.738	1	82.0066	2.053e-07	82.007					1	105.277	8.52006e-13	105.28	1	80.7384	2.92238e-07	80.738	1	84.1397	1.23403e-07	84.14	1	64.5075	1.06141e-05
Q9BUP3	Oxidoreductase HTATIP2	HTATIP2	228	1.6465	1.5418	1.4761	1.7059	1.6109	1.6394	1.8004	1.852	0.93551	0.98237	Q9BUP3	228	Q9BUP3	Q9BUP3	Oxidoreductase HTATIP2	HTATIP2	sp|Q9BUP3|HTAI2_HUMAN Oxidoreductase HTATIP2 OS=Homo sapiens OX=9606 GN=HTATIP2 PE=1 SV=2	1	63.5037	8.89478e-34	141.85	134.63	114.31	0.999999	60.5357	8.89478e-34	141.85	0.999999	62.673	4.71484e-26	136.2	1	63.5037	5.45744e-16	120.7	0.999426	32.4109	0.000435033	50.874	0.999998	56.5745	3.04109e-25	131.45	0.999998	57.5445	5.587e-27
P07910	Heterogeneous nuclear ribonucleoproteins C1/C2	HNRNPC	8	1.6457	1.6866	1.6397	1.6781	1.5018	1.6854	0.8614	0.83277	0.83147	0.85446	P07910	8	P07910	P07910	Heterogeneous nuclear ribonucleoproteins C1/C2	HNRNPC	sp|P07910|HNRPC_HUMAN Heterogeneous nuclear ribonucleoproteins C1/C2 OS=Homo sapiens OX=9606 GN=HNRNPC PE=1 SV=4	1	192.117	7.65749e-58	215.89	173.15	192.12	1	212.276	2.17724e-47	212.28	1	192.117	3.1755e-36	192.12	1	215.845	7.70616e-58	215.84	1	192.117	3.1755e-36	192.12	1	215.894	7.65749e-58	215.89	1	193.833	2.62276e-36
P16403	Histone H1.4;Histone H1.3;Histone H1.1;Histone H1t;Histone H1.2	HIST1H1E;HIST1H1D;HIST1H1A;HIST1H1T;HIST1H1C	75;76;78;79;75	1.6454	1.4979	1.6143	1.7242	1.6437	1.9901	0.89083	0.85312	1.5498	1.6099	P10412;P16402;Q02539;P22492;P16403	75;76;78;79;75	P10412;P16403	P16403	Histone H1.4;Histone H1.3;Histone H1.1;Histone H1t;Histone H1.2	HIST1H1E;HIST1H1D;HIST1H1A;HIST1H1T;HIST1H1C	sp|P10412|H14_HUMAN Histone H1.4 OS=Homo sapiens OX=9606 GN=HIST1H1E PE=1 SV=2;sp|P16402|H13_HUMAN Histone H1.3 OS=Homo sapiens OX=9606 GN=HIST1H1D PE=1 SV=2;sp|Q02539|H11_HUMAN Histone H1.1 OS=Homo sapiens OX=9606 GN=HIST1H1A PE=1 SV=3;sp|P22492|H1T_HUMAN	1	75.9106	7.46988e-184	282.05	248.58	75.911	1	184.992	2.14922e-53	184.99	1	147.695	6.52569e-75	221.6	1	150.587	7.46988e-184	282.05	1	75.9106	3.38212e-140	259.23	1	127.321	4.53524e-161	268.98	1	116.348	1.48714e-104
P50995	Annexin A11	ANXA11	214	1.6444	1.1117	1.1079	1.0592	0.92874	1.0218	1.3058	1.2792			P50995	214	P50995	P50995	Annexin A11	ANXA11	sp|P50995|ANX11_HUMAN Annexin A11 OS=Homo sapiens OX=9606 GN=ANXA11 PE=1 SV=1	1	19.8679	4.6759e-14	104.03	97.076	19.868	1	81.9667	7.35278e-10	81.967	1	104.026	4.6759e-14	104.03	1	80.2376	1.85022e-09	80.238	1	19.8679	0.0279417	19.868	1	77.3913	3.68543e-09	77.391	1	30.5867	0.00282665
Q7KZF4	Staphylococcal nuclease domain-containing protein 1	SND1	886	1.6438	1.8376	1.2943	1.694	2.2559	2.5727	0.86799	0.92512	1.0272		Q7KZF4	886	Q7KZF4	Q7KZF4	Staphylococcal nuclease domain-containing protein 1	SND1	sp|Q7KZF4|SND1_HUMAN Staphylococcal nuclease domain-containing protein 1 OS=Homo sapiens OX=9606 GN=SND1 PE=1 SV=1	1	113.685	3.39695e-47	171.67	165.26	113.69	1	125.523	7.81614e-19	125.52	1	131.608	6.66957e-25	131.61	1	127.753	1.13719e-24	127.75	1	113.685	2.89234e-13	113.69	1	125.893	3.88456e-19	125.89	1	116.43	1.04406e-17
O75533	Splicing factor 3B subunit 1	SF3B1	554	1.6438	1.5302	1.7814	1.0259	1.0838					0.99178	O75533	554	O75533	O75533	Splicing factor 3B subunit 1	SF3B1	sp|O75533|SF3B1_HUMAN Splicing factor 3B subunit 1 OS=Homo sapiens OX=9606 GN=SF3B1 PE=1 SV=3	1	49.4182	0.00605079	65.157	32.547	49.418	1	37.0646	0.0160082	37.065	1	49.4182	0.00605079	49.418	1	49.4182	0.00605079	49.418
Q99714	3-hydroxyacyl-CoA dehydrogenase type-2	HSD17B10	52		1.6962	0.98088				1.143				Q99714	52	Q99714	Q99714	3-hydroxyacyl-CoA dehydrogenase type-2	HSD17B10	sp|Q99714|HCD2_HUMAN 3-hydroxyacyl-CoA dehydrogenase type-2 OS=Homo sapiens OX=9606 GN=HSD17B10 PE=1 SV=3	0.5	0	4.4941e-25	96.54	96.54	13.092	0.5	0	8.71368e-19	89.721													0.5	0	4.4941e-25	96.54
P58876	Histone H2B type F-S;Histone H2B type 1-K;Histone H2B type 1-D;Histone H2B type 1-C/E/F/G/I;Histone H2B type 2-E;Histone H2B type 1-H;Histone H2B type 2-F;Histone H2B type 3-B;Histone H2B type 1-N;Histone H2B type 1-M;Histone H2B type 1-L	H2BFS;HIST1H2BK;HIST1H2BD;HIST1H2BC;HIST2H2BE;HIST1H2BH;HIST2H2BF;HIST3H2BB;HIST1H2BN;HIST1H2BM;HIST1H2BL	113;117;117;117;117;117;117;117;117;117;117;117	1.6422	0.969	0.89591	0.83407	1.9032	1.0854	0.98115	0.86918	0.90939	1.3698	A0A2R8Y619;P57053;O60814;P58876;P62807;Q16778;Q93079;Q5QNW6;Q8N257;Q99877;Q99879;Q99880	113;117;117;117;117;117;117;117;117;117;117;117	A0A2R8Y619;P57053;P58876;P62807;Q16778;Q93079;Q8N257;Q99877;Q99879;Q99880	P58876	Histone H2B type F-S;Histone H2B type 1-K;Histone H2B type 1-D;Histone H2B type 1-C/E/F/G/I;Histone H2B type 2-E;Histone H2B type 1-H;Histone H2B type 2-F;Histone H2B type 3-B;Histone H2B type 1-N;Histone H2B type 1-M;Histone H2B type 1-L	H2BFS;HIST1H2BK;HIST1H2BD;HIST1H2BC;HIST2H2BE;HIST1H2BH;HIST2H2BF;HIST3H2BB;HIST1H2BN;HIST1H2BM;HIST1H2BL	tr|A0A2R8Y619|A0A2R8Y619_HUMAN Histone H2B OS=Homo sapiens OX=9606 PE=1 SV=1;sp|P57053|H2BFS_HUMAN Histone H2B type F-S OS=Homo sapiens OX=9606 GN=H2BFS PE=1 SV=2;sp|O60814|H2B1K_HUMAN Histone H2B type 1-K OS=Homo sapiens OX=9606 GN=HIST1H2BK PE=1 SV=3;sp|	1	134.719	1.66108e-164	279.49	240.94	279.49	0.993218	21.6569	5.15253e-16	91.276	0.999733	35.7418	2.01237e-21	142.83	0.999986	48.3984	9.57228e-22	120.55	1	134.719	1.66108e-164	279.49	0.80757	6.1942	4.85721e-08	62.303	1	133.571	1.52458e-142
Q8WUA2	Peptidyl-prolyl cis-trans isomerase-like 4	PPIL4	375	1.6418										Q8WUA2	375	Q8WUA2	Q8WUA2	Peptidyl-prolyl cis-trans isomerase-like 4	PPIL4	sp|Q8WUA2|PPIL4_HUMAN Peptidyl-prolyl cis-trans isomerase-like 4 OS=Homo sapiens OX=9606 GN=PPIL4 PE=1 SV=1	0.767664	5.19055	1.10939e-08	68.88	64.694	68.88
Q8WW33	Gametocyte-specific factor 1	GTSF1	152	1.6417	1.7609	1.9567	2.0158	2.8675	1.9142	2.154	2.5925	1.7447	1.5728	Q8WW33	152	Q8WW33	Q8WW33	Gametocyte-specific factor 1	GTSF1	sp|Q8WW33|GTSF1_HUMAN Gametocyte-specific factor 1 OS=Homo sapiens OX=9606 GN=GTSF1 PE=1 SV=2	1	77.5241	0.000606981	93.096	76.871	93.096	1	77.5241	0.00140775	93.096	1	64.4244	0.00152618	69.602	1	77.3767	0.000606981	85.958	1	64.399	0.00219899	65.234	1	70.7305	0.00108037	72.496	0.999999	60.5798	0.00267545
O75534	Cold shock domain-containing protein E1	CSDE1	729	1.639	1.6417	1.5389	1.7639	1.9261	1.3731	1.0989	1.0208	0.80617	0.78091	O75534	729	O75534	O75534	Cold shock domain-containing protein E1	CSDE1	sp|O75534|CSDE1_HUMAN Cold shock domain-containing protein E1 OS=Homo sapiens OX=9606 GN=CSDE1 PE=1 SV=2	1	30.3312	2.51422e-09	136.02	98.842	30.331	1	89.2472	2.51422e-09	120.77	1	57.5984	6.50393e-06	102.62	1	73.8478	0.000506511	73.848	1	30.3312	0.0569231	30.331	1	24.853	2.9539e-05	93.839	1	72.5312	0.000558808
P23246	Splicing factor, proline- and glutamine-rich	SFPQ	421	1.6387	1.814	1.3302	1.8923	1.1189	1.2906	1.6016	2.1931	0.6193	0.63422	P23246	421	P23246	P23246	Splicing factor, proline- and glutamine-rich	SFPQ	sp|P23246|SFPQ_HUMAN Splicing factor, proline- and glutamine-rich OS=Homo sapiens OX=9606 GN=SFPQ PE=1 SV=2	1	75.294	4.28006e-05	122.94	85.283	75.294	1	41.7043	0.000779881	64.918	1	74.2369	0.000191367	74.237	1	64.6401	0.000801152	64.64	1	75.294	0.000195993	75.294	1	67.2066	0.00303418	67.207	1	64.2973	0.00151601
Q9GZL7	Ribosome biogenesis protein WDR12	WDR12	376	1.6374	1.7317	0.96615	0.72349	1.5628	0.9268	1.526	1.9018			Q9GZL7	376	Q9GZL7	Q9GZL7	Ribosome biogenesis protein WDR12	WDR12	sp|Q9GZL7|WDR12_HUMAN Ribosome biogenesis protein WDR12 OS=Homo sapiens OX=9606 GN=WDR12 PE=1 SV=2	1	70.7751	1.83023e-05	75.018	68.437	75.018	0.997718	26.4063	0.0147512	26.808	0.997894	26.7565	0.0147512	26.808	0.999874	38.9831	0.00231509	39.385	0.976162	16.1226	0.0562623	16.123	0.99941	32.2919	0.0351221	32.507	1	64.382	8.2198e-05
Q96AP7	Endothelial cell-selective adhesion molecule	ESAM	276	1.6373	1.4105	1.4263	1.3422	1.3997		1.5288	1.4574			Q96AP7	276	Q96AP7	Q96AP7	Endothelial cell-selective adhesion molecule	ESAM	sp|Q96AP7|ESAM_HUMAN Endothelial cell-selective adhesion molecule OS=Homo sapiens OX=9606 GN=ESAM PE=1 SV=1	1	76.4849	4.38516e-18	115.15	115.15	85.146	0.999952	43.186	0.000161837	57.496	1	75.2607	4.38516e-18	115.15	1	69.2373	4.94574e-13	97.32					0.999995	53.3048	2.92295e-09	77.899	1	66.2963	0.000544373
P52799	Ephrin-B2	EFNB2	306	1.6364	1.0319	1.0212	0.72497	0.80833		0.71722				P52799	306	P52799	P52799	Ephrin-B2	EFNB2	sp|P52799|EFNB2_HUMAN Ephrin-B2 OS=Homo sapiens OX=9606 GN=EFNB2 PE=1 SV=1	1	115.133	7.94949e-60	126.11	126.11	126.11	0.999985	48.2942	1.69848e-12	52.106	0.998067	27.1288	0.00169551	27.452	1	115.133	7.94949e-60	126.11					1	85.2334	1.06188e-27	87.893
Q9P2J5	Leucine--tRNA ligase, cytoplasmic	LARS	984	1.6332	1.693	1.1661	1.0516	0.95838		1.7521				Q9P2J5	984	Q9P2J5	Q9P2J5	Leucine--tRNA ligase, cytoplasmic	LARS	sp|Q9P2J5|SYLC_HUMAN Leucine--tRNA ligase, cytoplasmic OS=Homo sapiens OX=9606 GN=LARS PE=1 SV=2	0.548269	0.841137	0.000111869	66.285	66.285	60.55	0.546685	0.813373	0.000111869	66.285	0.52778	0.483083	0.00362221	38.511	0.538678	0.673256	0.00412682	50.155					0.548269	0.841137	0.00021466	60.55
P24928	DNA-directed RNA polymerase II subunit RPB1	POLR2A	918	1.6363	1.3207	1.7591	0.96728	1.1819		0.48876		0.8484		P24928	918	P24928	P24928	DNA-directed RNA polymerase II subunit RPB1	POLR2A	sp|P24928|RPB1_HUMAN DNA-directed RNA polymerase II subunit RPB1 OS=Homo sapiens OX=9606 GN=POLR2A PE=1 SV=2	0.856739	4.82155	1.95338e-119	196.28	196.28	73.781	0.833837	7.08257	1.95338e-119	196.28	0.563121	0	4.61023e-21	95.255	0.501786	0	1.21464e-29	113.13					0.519838	0	3.78144e-29	107.19
Q86VP1	Tax1-binding protein 1	TAX1BP1	480	1.6341	0.63567	0.74102	0.50816			1.1806	1.0009			Q86VP1	480	Q86VP1	Q86VP1	Tax1-binding protein 1	TAX1BP1	sp|Q86VP1|TAXB1_HUMAN Tax1-binding protein 1 OS=Homo sapiens OX=9606 GN=TAX1BP1 PE=1 SV=2	0.880285	8.66476	0.000991983	53.995	42.079	53.995	0.5	0	0.000991983	45.864	0.531955	0.555871	0.00495647	46.964									0.528379	0.493528	0.00213274	39.005	0.512454	0.216401	0.0410317
O95235	Kinesin-like protein KIF20A	KIF20A	453	1.6333	1.4847	1.8899	1.4804	1.5353	0.97677	1.0579	1.1722			O95235	453	O95235	O95235	Kinesin-like protein KIF20A	KIF20A	sp|O95235|KI20A_HUMAN Kinesin-like protein KIF20A OS=Homo sapiens OX=9606 GN=KIF20A PE=1 SV=1	1	45.9965	0.0028205	64.654	41.967	45.997	1	25.3858	0.00860426	56.432	1	38.7503	0.00912456	55.461	1	53.7511	0.0046838	53.751	1	45.9965	0.0188062	45.997	1	45.368	0.00483464	64.654	1	63.2161	0.00527649
P35659	Protein DEK	DEK	371	1.6328		1.7496	1.5796	1.4528	1.5093	1.1059	1.2233			P35659	371	P35659	P35659	Protein DEK	DEK	sp|P35659|DEK_HUMAN Protein DEK OS=Homo sapiens OX=9606 GN=DEK PE=1 SV=1	1	63.5651	0.00742333	86.833	54.897	63.565	1	65.8797	0.0235903	65.88	1	55.8722	0.0423016	55.872	1	86.8328	0.00742333	86.833	1	63.5651	0.0264859	63.565	1	56.0143	0.0419635	56.014	1	50.0403	0.057195
Q7Z739	YTH domain-containing family protein 3	YTHDF3	399		1.6898		1.8982	1.5426		0.737				Q7Z739	399	Q7Z739	Q7Z739	YTH domain-containing family protein 3	YTHDF3	sp|Q7Z739|YTHD3_HUMAN YTH domain-containing family protein 3 OS=Homo sapiens OX=9606 GN=YTHDF3 PE=1 SV=1	0.577732	1.36139	4.92401e-72	129.5	129.5	129.5					0.5	0	3.87118e-28	90.246	0.5	0	6.82747e-09	44.915					0.5	0	3.68412e-16	61.608
Q9Y324	rRNA-processing protein FCF1 homolog	FCF1	137	1.6326	1.4717	1.7281	1.3006	1.308		1.0288				Q9Y324	137	Q9Y324	Q9Y324	rRNA-processing protein FCF1 homolog	FCF1	sp|Q9Y324|FCF1_HUMAN rRNA-processing protein FCF1 homolog OS=Homo sapiens OX=9606 GN=FCF1 PE=2 SV=1	1	58.8298	5.18453e-10	102.38	102.38	58.83	1	102.378	5.18453e-10	102.38	1	58.8298	3.81201e-05	58.83	1	53.1692	7.60986e-08	87.148					1	62.1651	0.000508144	62.165
Q9BRU9	rRNA-processing protein UTP23 homolog	UTP23	85	1.6324			2.0336	1.8943						Q9BRU9	85	Q9BRU9	Q9BRU9	rRNA-processing protein UTP23 homolog	UTP23	sp|Q9BRU9|UTP23_HUMAN rRNA-processing protein UTP23 homolog OS=Homo sapiens OX=9606 GN=UTP23 PE=1 SV=2	1	40.3516	0.0112178	40.352	13.327	40.352					1	40.3516	0.0112178	40.352	1	37.549	0.015201	37.549
Q13573	SNW domain-containing protein 1	SNW1	258	1.6321	1.7954	2.1665	1.2318	1.2146	1.0743	1.3843				Q13573	258	Q13573	Q13573	SNW domain-containing protein 1	SNW1	sp|Q13573|SNW1_HUMAN SNW domain-containing protein 1 OS=Homo sapiens OX=9606 GN=SNW1 PE=1 SV=1	0.999981	47.2879	0.0041413	47.288	38.334	47.288	0.998399	27.9493	0.0157436	32.933	0.999981	47.2879	0.0041413	47.288	0.999755	36.1153	0.0106998	36.284	0.53444	0.599225	0.0403698	23.092	0.559708	1.04221	0.00464937	42.425
Q9Y383	Putative RNA-binding protein Luc7-like 1;Putative RNA-binding protein Luc7-like 2	LUC7L;LUC7L2	186;186	1.6317		2.5449						0.72126	0.90805	Q9NQ29;Q9Y383	186;186	Q9NQ29;Q9Y383	Q9Y383	Putative RNA-binding protein Luc7-like 1;Putative RNA-binding protein Luc7-like 2	LUC7L;LUC7L2	sp|Q9NQ29|LUC7L_HUMAN Putative RNA-binding protein Luc7-like 1 OS=Homo sapiens OX=9606 GN=LUC7L PE=1 SV=1;sp|Q9Y383|LC7L2_HUMAN Putative RNA-binding protein Luc7-like 2 OS=Homo sapiens OX=9606 GN=LUC7L2 PE=1 SV=2	1	94.6877	3.76347e-07	117.27	117.27	94.688	1	94.6877	3.76347e-07	94.688
Q14681	BTB/POZ domain-containing protein KCTD2	KCTD2	252	1.4206	1.6852	1.5232				0.96277				Q14681	252	Q14681	Q14681	BTB/POZ domain-containing protein KCTD2	KCTD2	sp|Q14681|KCTD2_HUMAN BTB/POZ domain-containing protein KCTD2 OS=Homo sapiens OX=9606 GN=KCTD2 PE=1 SV=3	0.5	0	0.000201291	47.222	44.539	41.367	0.5	0	0.0137602	40.798													0.5	0	0.0128869	25.917
P33527	Multidrug resistance-associated protein 1	ABCC1	290	1.6304	0.93706	0.90232	0.98393	0.96483		1.3618	1.3034	1.0165	1.0367	P33527	290	P33527	P33527	Multidrug resistance-associated protein 1	ABCC1	sp|P33527|MRP1_HUMAN Multidrug resistance-associated protein 1 OS=Homo sapiens OX=9606 GN=ABCC1 PE=1 SV=3	1	137.024	3.14677e-35	147.64	135.12	147.64	1	80.3642	1.25546e-07	83.968	1	117.544	1.26369e-18	123.92	1	137.024	3.14677e-35	147.64					1	122.615	2.38766e-25	133.23	0.999883	39.3222	0.000705045
Q9NZL4	Hsp70-binding protein 1	HSPBP1	94	1.6289	0.81981	0.94148	0.77184	0.71052		0.97455	0.82868			Q9NZL4	94	Q9NZL4	Q9NZL4	Hsp70-binding protein 1	HSPBP1	sp|Q9NZL4|HPBP1_HUMAN Hsp70-binding protein 1 OS=Homo sapiens OX=9606 GN=HSPBP1 PE=1 SV=2	1	53.0801	0.000378831	77.062	63.962	53.08	1	53.5672	0.00272047	53.567	1	62.4075	0.00187593	62.408	1	64.4386	0.00160499	64.439					1	77.0624	0.000378831	77.062	1	53.0801	0.00276451
Q96HC4	PDZ and LIM domain protein 5	PDLIM5	473		1.6851									Q96HC4	473	Q96HC4	Q96HC4	PDZ and LIM domain protein 5	PDLIM5	sp|Q96HC4|PDLI5_HUMAN PDZ and LIM domain protein 5 OS=Homo sapiens OX=9606 GN=PDLIM5 PE=1 SV=5	1	22.4351	0.020937	22.435	22.435	22.435
Q9HAU4	E3 ubiquitin-protein ligase SMURF2;E3 ubiquitin-protein ligase SMURF1	SMURF2;SMURF1	88;89		1.6851	0.87399	1.3214	0.91072						Q9HAU4;Q9HCE7	88;89	Q9HAU4;Q9HCE7	Q9HAU4	E3 ubiquitin-protein ligase SMURF2;E3 ubiquitin-protein ligase SMURF1	SMURF2;SMURF1	sp|Q9HAU4|SMUF2_HUMAN E3 ubiquitin-protein ligase SMURF2 OS=Homo sapiens OX=9606 GN=SMURF2 PE=1 SV=1;sp|Q9HCE7|SMUF1_HUMAN E3 ubiquitin-protein ligase SMURF1 OS=Homo sapiens OX=9606 GN=SMURF1 PE=1 SV=2	1	39.7848	0.00565095	39.785	39.785	39.785	1	33.0574	0.0119484	33.057	1	39.7848	0.00565095	39.785	1	33.8904	0.0111638	33.89
P07355	Annexin A2;Putative annexin A2-like protein	ANXA2;ANXA2P2	227;227	1.6278	1.5862	1.3868	1.3808	1.4668	1.6173	2.2282	2.5157	1.2382	1.3713	P07355;A6NMY6	227;227	P07355	P07355	Annexin A2;Putative annexin A2-like protein	ANXA2;ANXA2P2	sp|P07355|ANXA2_HUMAN Annexin A2 OS=Homo sapiens OX=9606 GN=ANXA2 PE=1 SV=2;sp|A6NMY6|AXA2L_HUMAN Putative annexin A2-like protein OS=Homo sapiens OX=9606 GN=ANXA2P2 PE=5 SV=2	1	34.0003	0.00026158	91.549	62.462	34	1	63.4729	0.000291603	91.549	1	53.2519	0.00133034	66.498	1	56.2048	0.00178474	63.091	1	34.0003	0.0015062	65.179	1	80.0144	0.00026158	80.014	1	36.2843	0.000314106
Q9H910	Hematological and neurological expressed 1-like protein	HN1L	142	1.6253			1.0193				1.4345			Q9H910	142	Q9H910	Q9H910	Hematological and neurological expressed 1-like protein	HN1L	sp|Q9H910|JUPI2_HUMAN Jupiter microtubule associated homolog 2 OS=Homo sapiens OX=9606 GN=JPT2 PE=1 SV=1	1	31.0889	0.00139663	62.378	41.715	31.089					1	33.796	0.0311498	33.796													1	31.0889	0.0394892
P31641	Sodium- and chloride-dependent taurine transporter	SLC6A6	19	1.625		1.2481	1.5036	1.334			1.5392	0.6951	0.78237	P31641	19	P31641	P31641	Sodium- and chloride-dependent taurine transporter	SLC6A6	sp|P31641|SC6A6_HUMAN Sodium- and chloride-dependent taurine transporter OS=Homo sapiens OX=9606 GN=SLC6A6 PE=1 SV=2	0.999997	55.7753	8.1304e-05	147.24	94.455	147.24	0.993365	21.7528	0.0233676	55.549	0.695787	3.60565	0.00304478	43.03	0.999965	44.5379	0.00629489	78.334					0.499879	0	0.00268865	44.511	0.988354	19.2872	0.0203842
P11387	DNA topoisomerase 1	TOP1	402	1.6248	1.4414	1.2799		1.5718	1.6655		1.6482		1.33	P11387	402	P11387	P11387	DNA topoisomerase 1	TOP1	sp|P11387|TOP1_HUMAN DNA topoisomerase 1 OS=Homo sapiens OX=9606 GN=TOP1 PE=1 SV=2	0.921131	10.6741	0.000849768	75.509	37.107	70.1	0.7913	5.78818	0.00171363	63.624					0.540638	0.707507	0.0160018	31.597	0.543578	0.758948	0.0143148	33.088					0.921131	10.6741	0.000849768
Q9NPR2	Semaphorin-4B	SEMA4B	744	1.6236	1.1024	1.0901	0.87591	1.0047	1.1009	0.6622	0.45403	0.73927	0.88797	Q9NPR2	744	Q9NPR2	Q9NPR2	Semaphorin-4B	SEMA4B	sp|Q9NPR2|SEM4B_HUMAN Semaphorin-4B OS=Homo sapiens OX=9606 GN=SEMA4B PE=1 SV=3	1	97.7365	2.09965e-10	126.1	126.1	126.1	0.966935	14.6603	0.0505211	17.629	0.99995	42.9824	0.00214628	54.898	0.999751	36.0422	0.00149706	64.675	0.999902	40.0874	0.000141291	65.805	1	77.4974	2.09965e-10	106.13	0.999885	39.3746	0.000151597
Q8IYL3	UPF0688 protein C1orf174	C1orf174	39	1.622		1.9922		1.6532		1.7001				Q8IYL3	39	Q8IYL3	Q8IYL3	UPF0688 protein C1orf174	C1orf174	sp|Q8IYL3|CA174_HUMAN UPF0688 protein C1orf174 OS=Homo sapiens OX=9606 GN=C1orf174 PE=1 SV=2	0.999996	53.6806	1.56543e-12	76.889	76.889	76.889	0.996586	24.6521	0.000574201	50.783					0.959396	13.7343	0.00215372	40.177					0.997572	26.1375	0.000125156	44.683
Q12769	Nuclear pore complex protein Nup160	NUP160	496	0.75814	1.6803	1.1812	1.6335	1.0366	1.4805	0.90423	1.6419			Q12769	496	Q12769	Q12769	Nuclear pore complex protein Nup160	NUP160	sp|Q12769|NU160_HUMAN Nuclear pore complex protein Nup160 OS=Homo sapiens OX=9606 GN=NUP160 PE=1 SV=3	0.560129	1.04962	0.00160016	77.677	49.279	65.347	0.560129	1.04962	0.00226509	65.347	0.536804	0.640504	0.0472753	29.544	0.550523	0.880674	0.00160016	77.677	0.539422	0.68625	0.0268414	25.701	0.553051	0.925068	0.00365254	54.608	0.534662	0.603115	0.068391
P29317	Ephrin type-A receptor 2	EPHA2	778	1.6213	0.90189	0.83698	0.93924	0.96245	0.92585	1.6261	1.5228	1.1258	1.1136	P29317	778	P29317	P29317	Ephrin type-A receptor 2	EPHA2	sp|P29317|EPHA2_HUMAN Ephrin type-A receptor 2 OS=Homo sapiens OX=9606 GN=EPHA2 PE=1 SV=2	1	149.337	5.32012e-55	168.09	152.32	149.34	1	168.087	5.32012e-55	168.09	1	161.655	2.91101e-54	161.65	1	154.118	2.48038e-49	154.12	1	149.337	5.06348e-49	149.34	1	121.739	1.25885e-22	121.74	1	143.714	9.94202e-39
O94992	Protein HEXIM1	HEXIM1	181		1.6775	1.4591	1.9389	1.0423		1.2973			0.93621	O94992	181	O94992	O94992	Protein HEXIM1	HEXIM1	sp|O94992|HEXI1_HUMAN Protein HEXIM1 OS=Homo sapiens OX=9606 GN=HEXIM1 PE=1 SV=1	1	51.3458	0.00774901	83.265	5.8906	51.346	1	44.3492	0.0150552	44.349	1	83.2647	0.0127935	83.265	1	38.7758	0.0485504	50.607					1	58.9807	0.00778947	58.981	1	51.3458	0.0202278
Q96BH1	E3 ubiquitin-protein ligase RNF25	RNF25	334	1.6207	1.3004	1.1509	1.0174	1.5212	1.1228	0.76757	0.65619	1.0732	0.81589	Q96BH1	334	Q96BH1	Q96BH1	E3 ubiquitin-protein ligase RNF25	RNF25	sp|Q96BH1|RNF25_HUMAN E3 ubiquitin-protein ligase RNF25 OS=Homo sapiens OX=9606 GN=RNF25 PE=1 SV=1	0.999979	46.8403	2.06788e-06	72.797	72.797	72.797	0.997546	26.0904	0.000938346	43.791	0.996358	24.3706	0.00762936	29.58	0.999915	40.726	1.31212e-05	68.576	0.954279	13.1956	0.057848	15.193	0.999741	35.8725	0.000214603	51.265	0.941897	12.098	0.0674406
Q9UHB9	Signal recognition particle subunit SRP68	SRP68	5	1.6195						0.72832	0.77854			Q9UHB9	5	Q9UHB9	Q9UHB9	Signal recognition particle subunit SRP68	SRP68	sp|Q9UHB9|SRP68_HUMAN Signal recognition particle subunit SRP68 OS=Homo sapiens OX=9606 GN=SRP68 PE=1 SV=2	1	5.10738	0.00143317	71.78	44.891	5.1074																	1	3.36654	0.0738748	3.3665	1	5.10738	0.0650199
P07355	Annexin A2;Putative annexin A2-like protein	ANXA2;ANXA2P2	313;313	1.6117	1.3598	1.1837		1.1786	1.1664	1.1742	1.08	1.1319	1.1842	P07355;A6NMY6	313;313	P07355	P07355	Annexin A2;Putative annexin A2-like protein	ANXA2;ANXA2P2	sp|P07355|ANXA2_HUMAN Annexin A2 OS=Homo sapiens OX=9606 GN=ANXA2 PE=1 SV=2;sp|A6NMY6|AXA2L_HUMAN Putative annexin A2-like protein OS=Homo sapiens OX=9606 GN=ANXA2P2 PE=5 SV=2	1	218.47	6.99142e-94	232.56	232.56	232.56	1	125.284	1.34398e-15	125.28					1	124.857	1.93213e-15	124.86	1	71.3439	6.12009e-05	71.344	1	107.176	1.01842e-09	107.18	1	82.5721	1.47084e-05
O15438	Canalicular multispecific organic anion transporter 2	ABCC3	278	1.6117			1.3018	1.0409		0.91486	1.0006	0.38458	0.42511	O15438	278	O15438	O15438	Canalicular multispecific organic anion transporter 2	ABCC3	sp|O15438|MRP3_HUMAN Canalicular multispecific organic anion transporter 2 OS=Homo sapiens OX=9606 GN=ABCC3 PE=1 SV=3	1	55.6879	1.31179e-09	109.5	102.47	55.688					1	77.3901	1.49417e-09	77.39	1	45.3473	0.000135443	45.347					1	78.0879	1.31179e-09	78.088	1	70.0936	5.91433e-08
Q12933	TNF receptor-associated factor 2	TRAF2	176	1.6113	1.6563	1.393	1.8354			1.4895				Q12933	176	Q12933	Q12933	TNF receptor-associated factor 2	TRAF2	sp|Q12933|TRAF2_HUMAN TNF receptor-associated factor 2 OS=Homo sapiens OX=9606 GN=TRAF2 PE=1 SV=2	0.99952	33.1872	1.20498e-06	86.378	70.435	68.944	0.992075	20.9754	0.0083056	39.91	0.99952	33.1872	0.000239683	68.944									0.999286	31.4594	0.000416056	64.454
Q9UKX7	Nuclear pore complex protein Nup50	NUP50	173	1.6101		1.2564	1.0842	1.2353		1.1194				Q9UKX7	173	Q9UKX7	Q9UKX7	Nuclear pore complex protein Nup50	NUP50	sp|Q9UKX7|NUP50_HUMAN Nuclear pore complex protein Nup50 OS=Homo sapiens OX=9606 GN=NUP50 PE=1 SV=2	0.999998	57.1808	2.55056e-07	74.776	62.923	74.776	0.999998	57.1808	5.49163e-06	74.776	0.999995	53.3604	2.55056e-07	64.2	0.999994	52.2402	1.60706e-06	60.528					0.959316	13.7254	0.00665077	26.956
Q9P1Z2	Calcium-binding and coiled-coil domain-containing protein 1	CALCOCO1	304		1.6678									Q9P1Z2	304	Q9P1Z2	Q9P1Z2	Calcium-binding and coiled-coil domain-containing protein 1	CALCOCO1	sp|Q9P1Z2|CACO1_HUMAN Calcium-binding and coiled-coil domain-containing protein 1 OS=Homo sapiens OX=9606 GN=CALCOCO1 PE=1 SV=2	0.505301	0.176673	0.00270414	24.192	22.213	18.965	0.497659	0	0.00270414	24.192	0.460245	0	0.0596561	9.381
Q16181	Septin-7	2023-09-07	213	1.6097	1.3891	1.0318	1.1287			1.4132	1.6928			Q16181	213	Q16181	Q16181	Septin-7	2023-09-07	sp|Q16181|SEPT7_HUMAN Septin-7 OS=Homo sapiens OX=9606 GN=SEPT7 PE=1 SV=2	1	63.6513	0.000769912	76.228	63.651	76.228	0.999998	57.2459	0.000911858	73.499	0.999994	52.259	0.00242822	61.593									1	63.6513	0.000769912	76.228	0.999076	30.3386	0.0140839
P27816	Microtubule-associated protein 4	MAP4	1070	1.6092	1.3739	1.0168	1.5505	1.0562		1.2223				P27816	1070	P27816	P27816	Microtubule-associated protein 4	MAP4	sp|P27816|MAP4_HUMAN Microtubule-associated protein 4 OS=Homo sapiens OX=9606 GN=MAP4 PE=1 SV=3	0.99984	37.9671	8.24162e-05	50.425	50.425	45.413	0.998553	28.3895	0.000158361	50.425	0.99984	37.9671	8.24162e-05	45.413	0.973166	15.595	0.0348497	16.593					0.998348	27.8129	0.00132645	32.227
Q99961	Endophilin-A2	SH3GL1	20	1.6086			1.1894	1.074		0.96637				Q99961	20	Q99961	Q99961	Endophilin-A2	SH3GL1	sp|Q99961|SH3G1_HUMAN Endophilin-A2 OS=Homo sapiens OX=9606 GN=SH3GL1 PE=1 SV=1	0.974276	15.7834	8.42152e-05	57.338	55.33	57.338					0.856619	7.76295	0.000176264	50.787	0.974276	15.7834	8.42152e-05	57.338					0.723785	4.18362	0.000112421	55.33
Q8TC12	Retinol dehydrogenase 11	RDH11	26	1.6084		1.0179				0.73689		0.69841	0.89033	Q8TC12	26	Q8TC12	Q8TC12	Retinol dehydrogenase 11	RDH11	sp|Q8TC12|RDH11_HUMAN Retinol dehydrogenase 11 OS=Homo sapiens OX=9606 GN=RDH11 PE=1 SV=2	1	79.6118	6.90566e-06	82.59	82.59	82.59	0.999992	50.787	0.00124879	50.787													1	66.3353	6.90566e-06	66.335
Q14258	E3 ubiquitin/ISG15 ligase TRIM25	TRIM25	345	1.6079	1.6009	1.9777	2.0496			1.0005	1.3017			Q14258	345	Q14258	Q14258	E3 ubiquitin/ISG15 ligase TRIM25	TRIM25	sp|Q14258|TRI25_HUMAN E3 ubiquitin/ISG15 ligase TRIM25 OS=Homo sapiens OX=9606 GN=TRIM25 PE=1 SV=2	0.988238	19.2437	3.48055e-06	95.981	59.053	72.209	0.978728	16.6284	0.000155209	64.842	0.98274	17.554	3.48055e-06	91.441									0.828899	6.85248	0.0120847	29.217	0.939726	11.9287	0.00306594
Q01813	ATP-dependent 6-phosphofructokinase, platelet type	PFKP	625	1.6077	1.4542					1.2699		1.1627	0.94764	Q01813	625	Q01813	Q01813	ATP-dependent 6-phosphofructokinase, platelet type	PFKP	sp|Q01813|PFKAP_HUMAN ATP-dependent 6-phosphofructokinase, platelet type OS=Homo sapiens OX=9606 GN=PFKP PE=1 SV=2	0.856997	7.77633	0.000792778	76.728	76.728	56.599	0.800143	6.02448	0.020722	42.317													0.856997	7.77633	0.0030965	56.599
Q96R06	Sperm-associated antigen 5	SPAG5	488	1.6069	1.374	1.5383	1.2707	1.073		1.1243	1.5685			Q96R06	488	Q96R06	Q96R06	Sperm-associated antigen 5	SPAG5	sp|Q96R06|SPAG5_HUMAN Sperm-associated antigen 5 OS=Homo sapiens OX=9606 GN=SPAG5 PE=1 SV=2	1	29.6865	1.30868e-10	97.579	97.579	29.687	1	33.8723	4.69551e-05	50.831	1	53.2552	3.66032e-05	53.255	1	74.1408	1.30868e-10	97.579					1	63.1452	7.09102e-08	74.786	1	29.6865	0.00332333
P26358	DNA (cytosine-5)-methyltransferase 1	DNMT1	1135	1.6044	1.4149	0.77004	1.4233	1.8284			0.97324			P26358	1135	P26358	P26358	DNA (cytosine-5)-methyltransferase 1	DNMT1	sp|P26358|DNMT1_HUMAN DNA (cytosine-5)-methyltransferase 1 OS=Homo sapiens OX=9606 GN=DNMT1 PE=1 SV=2	0.979779	16.8532	2.99092e-07	80.638	76.977	72.184	0.971787	15.3712	2.42196e-06	70.96	0.965363	14.4515	5.13909e-06	68.82	0.858208	7.81941	2.99092e-07	80.638	0.951533	12.9298	0.00263757	53.278					0.979779	16.8532	8.78659e-07
Q9ULC4	Malignant T-cell-amplified sequence 1	MCTS1	18	1.6043		1.314		1.2623				0.6942	0.92497	Q9ULC4	18	Q9ULC4	Q9ULC4	Malignant T-cell-amplified sequence 1	MCTS1	sp|Q9ULC4|MCTS1_HUMAN Malignant T-cell-amplified sequence 1 OS=Homo sapiens OX=9606 GN=MCTS1 PE=1 SV=1	1	49.5594	1.08506e-16	125.28	125.28	49.559	0.998143	27.3031	8.32016e-11	107.07	0.681626	3.30608	0.0476484	34.395	0.996652	24.7371	1.08506e-16	125.28
Q14258	E3 ubiquitin/ISG15 ligase TRIM25	TRIM25	320	1.6037	1.427	1.5606	1.6278	1.2752	1.3579	0.97093	0.9596	0.9501	0.9448	Q14258	320	Q14258	Q14258	E3 ubiquitin/ISG15 ligase TRIM25	TRIM25	sp|Q14258|TRI25_HUMAN E3 ubiquitin/ISG15 ligase TRIM25 OS=Homo sapiens OX=9606 GN=TRIM25 PE=1 SV=2	1	127.178	4.55603e-26	136.34	136.34	136.34	1	110.892	2.69941e-18	121.27	1	88.5882	2.05525e-09	94.569	1	83.2181	1.71888e-08	92.633	0.999999	60.8005	9.40178e-06	64.52	1	85.6184	8.88036e-10	100.77	0.999995	52.6873	6.0547e-05
Q86Y07	Serine/threonine-protein kinase VRK2	VRK2	377	1.6029							0.8745			Q86Y07	377	Q86Y07	Q86Y07	Serine/threonine-protein kinase VRK2	VRK2	sp|Q86Y07|VRK2_HUMAN Serine/threonine-protein kinase VRK2 OS=Homo sapiens OX=9606 GN=VRK2 PE=1 SV=3	0.82096	6.61373	0.0023906	49.423	43.32	49.423																					0.75176	4.81207	0.0412166
Q8NC51	Plasminogen activator inhibitor 1 RNA-binding protein	SERBP1	294	1.6026	2.0531	1.7665	1.7155	1.8865		0.86057	0.62971			Q8NC51	294	Q8NC51	Q8NC51	Plasminogen activator inhibitor 1 RNA-binding protein	SERBP1	sp|Q8NC51|PAIRB_HUMAN Plasminogen activator inhibitor 1 RNA-binding protein OS=Homo sapiens OX=9606 GN=SERBP1 PE=1 SV=2	0.999746	35.9545	6.13356e-06	95.573	70.187	62.924	0.997402	25.8425	0.00120807	53.252	0.998365	27.8584	0.00084818	71.241	0.998453	28.098	6.13356e-06	95.573					0.992966	21.4973	0.000452407	64.121	0.999746	35.9545	0.00213898
Q14573	Inositol 1,4,5-trisphosphate receptor type 3	ITPR3	92	1.6026	0.58358	1.006	0.9088	1.047		1.2505				Q14573	92	Q14573	Q14573	Inositol 1,4,5-trisphosphate receptor type 3	ITPR3	sp|Q14573|ITPR3_HUMAN Inositol 1,4,5-trisphosphate receptor type 3 OS=Homo sapiens OX=9606 GN=ITPR3 PE=1 SV=2	0.999988	49.3052	1.62262e-16	104.89	104.89	104.89	0.999915	40.6924	6.18185e-13	95.666	0.999988	49.3052	1.62262e-16	104.89	0.999333	31.7565	6.8529e-13	95.814					0.999944	42.4926	7.59916e-12	92.671
Q9UHB9	Signal recognition particle subunit SRP68	SRP68	277	1.602	1.4305	1.1573	1.6556	1.2982	1.3649	1.1543	1.0267		1.1202	Q9UHB9	277	Q9UHB9	Q9UHB9	Signal recognition particle subunit SRP68	SRP68	sp|Q9UHB9|SRP68_HUMAN Signal recognition particle subunit SRP68 OS=Homo sapiens OX=9606 GN=SRP68 PE=1 SV=2	1	57.4956	4.65056e-55	168.27	160.08	57.496	1	138.297	2.28313e-38	138.3	1	153.106	3.02728e-49	153.11	1	43.5343	2.59594e-13	96.379	1	57.4956	7.34842e-06	57.496	1	29.8919	0.00241591	29.892	1	102.326	7.24329e-14
P05388	60S acidic ribosomal protein P0;60S acidic ribosomal protein P0-like	RPLP0;RPLP0P6	134;134	1.6016	1.9231	1.8104	1.9177	2.8045		0.98135	1.0231			P05388;Q8NHW5	134;134	P05388	P05388	60S acidic ribosomal protein P0;60S acidic ribosomal protein P0-like	RPLP0;RPLP0P6	sp|P05388|RLA0_HUMAN 60S acidic ribosomal protein P0 OS=Homo sapiens OX=9606 GN=RPLP0 PE=1 SV=1;sp|Q8NHW5|RLA0L_HUMAN 60S acidic ribosomal protein P0-like OS=Homo sapiens OX=9606 GN=RPLP0P6 PE=5 SV=1	0.999999	61.1051	2.54117e-41	107.52	107.52	107.52	0.999982	47.3542	2.67943e-23	88.191	0.999999	61.1051	2.54117e-41	107.52	0.999999	59.4967	2.76338e-24	93.295					0.999968	44.9678	5.49535e-17	78.588	0.999533	33.3012	5.73237e-09
Q8WW12	PEST proteolytic signal-containing nuclear protein	PCNP	167	1.6015	1.4161	1.0373		1.2491	1.2105	0.83441	1.1247			Q8WW12	167	Q8WW12	Q8WW12	PEST proteolytic signal-containing nuclear protein	PCNP	sp|Q8WW12|PCNP_HUMAN PEST proteolytic signal-containing nuclear protein OS=Homo sapiens OX=9606 GN=PCNP PE=1 SV=2	1	50.1018	6.1734e-07	99.991	81.395	50.102	1	40.0246	0.00327236	40.025					1	65.805	0.00134342	65.805	1	50.1018	0.00100316	50.102	1	99.9908	6.1734e-07	99.991	1	85.42	1.12888e-05
Q9ULW0	Targeting protein for Xklp2	TPX2	582		1.6501					0.89112				Q9ULW0	582	Q9ULW0	Q9ULW0	Targeting protein for Xklp2	TPX2	sp|Q9ULW0|TPX2_HUMAN Targeting protein for Xklp2 OS=Homo sapiens OX=9606 GN=TPX2 PE=1 SV=2	0.5	0	0.020998	33.947	23.89	15.844																	0.5	0	0.020998	33.947
Q9ULW0	Targeting protein for Xklp2	TPX2	583		1.6501		1.2884	0.86053		1.0378				Q9ULW0	583	Q9ULW0	Q9ULW0	Targeting protein for Xklp2	TPX2	sp|Q9ULW0|TPX2_HUMAN Targeting protein for Xklp2 OS=Homo sapiens OX=9606 GN=TPX2 PE=1 SV=2	0.52149	0.373555	0.0179689	35.303	24.248	15.395					0.52149	0.373555	0.052262	15.395	0.520063	0.348725	0.0179689	35.303					0.51648	0.286395	0.020998	33.947
Q8WUA2	Peptidyl-prolyl cis-trans isomerase-like 4	PPIL4	323		1.6498	0.66399	1.2739						0.89946	Q8WUA2	323	Q8WUA2	Q8WUA2	Peptidyl-prolyl cis-trans isomerase-like 4	PPIL4	sp|Q8WUA2|PPIL4_HUMAN Peptidyl-prolyl cis-trans isomerase-like 4 OS=Homo sapiens OX=9606 GN=PPIL4 PE=1 SV=1	0.628492	2.28331	2.07259e-05	87.001	70.115	87.001	0.593173	1.63772	0.00374791	56.951	0.628492	2.28331	0.000322527	87.001	0.576754	1.34398	0.00895135	52.555
Q8N0T1	Uncharacterized protein C8orf59	C8orf59	21	1.6014		1.2836	1.4933	1.0287		1.3138		3.5984		Q8N0T1	21	Q8N0T1	Q8N0T1	Uncharacterized protein C8orf59	C8orf59	sp|Q8N0T1|CH059_HUMAN Uncharacterized protein C8orf59 OS=Homo sapiens OX=9606 GN=C8orf59 PE=1 SV=4	0.979613	16.8171	4.23362e-13	131.17	131.17	125.72	0.610726	1.9559	0.00027201	76.465	0.647476	2.64035	0.000197128	73.881	0.76613	5.15328	5.1999e-13	128.36					0.926332	10.9949	3.87787e-06	95.417
REV__Q9UEE9					1.6495											REV__Q9UEE9	REV__Q9UEE9				0.523048	0.400673	0.00479424	30.133	18.758	30.133
P13984	General transcription factor IIF subunit 2	GTF2F2	154	1.6	1.313	1.4676	0.9263	1.1216				0.99465		P13984	154	P13984	P13984	General transcription factor IIF subunit 2	GTF2F2	sp|P13984|T2FB_HUMAN General transcription factor IIF subunit 2 OS=Homo sapiens OX=9606 GN=GTF2F2 PE=1 SV=2	1	22.9022	5.58429e-06	58.073	58.073	22.902	1	14.148	0.0565633	14.148	1	22.9022	0.0156093	22.902	1	14.1051	0.0568926	14.105
Q08379	Golgin subfamily A member 2	GOLGA2	807	1.5998		1.1269	0.94483			1.6602				Q08379	807	Q08379	Q08379	Golgin subfamily A member 2	GOLGA2	sp|Q08379|GOGA2_HUMAN Golgin subfamily A member 2 OS=Homo sapiens OX=9606 GN=GOLGA2 PE=1 SV=3	1	51.8748	0.00111817	60.628	48.002	51.875	1	60.6282	0.00111817	60.628	1	51.8748	0.00190907	51.875									1	35.7368	0.00958257	35.737
P19447	TFIIH basal transcription factor complex helicase XPB subunit	ERCC3	217	1.5992	1.7067	1.5102	1.955	1.9331		0.78933				P19447	217	P19447	P19447	TFIIH basal transcription factor complex helicase XPB subunit	ERCC3	sp|P19447|ERCC3_HUMAN General transcription and DNA repair factor IIH helicase subunit XPB OS=Homo sapiens OX=9606 GN=ERCC3 PE=1 SV=1	0.993857	22.0894	4.50341e-22	106.03	106.03	106.03	0.891299	9.1379	1.18898e-05	53.553	0.988349	19.2855	9.34168e-15	82.975	0.988528	19.3536	4.84116e-13	82.037					0.87112	8.29891	0.000685053	36.246	0.5	0	0.0675418
P29373	Cellular retinoic acid-binding protein 2	CRABP2	87	1.5991	1.1837	0.93327	1.1387	1.2787	1.8476	1.9123	1.933	0.87085		P29373	87	P29373	P29373	Cellular retinoic acid-binding protein 2	CRABP2	sp|P29373|RABP2_HUMAN Cellular retinoic acid-binding protein 2 OS=Homo sapiens OX=9606 GN=CRABP2 PE=1 SV=2	1	81.0009	7.98875e-55	167.82	159.17	123.29	0.999999	58.3699	0.000145848	107.79	1	81.0009	7.98875e-55	167.82	0.999966	44.6877	2.46336e-49	155.11	0.999604	34.0226	1.70583e-11	86.8	0.999998	57.7891	0.000130056	108.67	0.999963	44.2995	2.18204e-22
P35251	Replication factor C subunit 1	RFC1	263		1.6462	2.0559	2.473	1.2031		1.2543	1.4975			P35251	263	P35251	P35251	Replication factor C subunit 1	RFC1	sp|P35251|RFC1_HUMAN Replication factor C subunit 1 OS=Homo sapiens OX=9606 GN=RFC1 PE=1 SV=4	0.672343	3.12171	3.89544e-17	109.89	105.7	89.668	0.649961	2.68771	5.2715e-09	72.086	0.672343	3.12171	1.17169e-11	89.668	0.643507	2.56502	3.89544e-17	109.89					0.602366	1.80377	2.80914e-09	72.359	0.5	0	1.70361e-05
P46013	Antigen KI-67	MKI67	1874	1.5989	1.9149	1.191	1.0451	0.95128		1.2903	1.3166			P46013	1874	P46013	P46013	Antigen KI-67	MKI67	sp|P46013|KI67_HUMAN Proliferation marker protein Ki-67 OS=Homo sapiens OX=9606 GN=MKI67 PE=1 SV=2	1	59.634	1.81112e-19	122.01	117.57	59.634	1	43.2974	3.83597e-19	117.26	1	44.1959	3.83597e-19	117.26	1	92.3804	3.99716e-08	92.38					1	50.9665	1.81112e-19	122.01	1	59.634	6.47845e-05
Q15459	Splicing factor 3A subunit 1	SF3A1	55	1.597	0.7575			0.93281		0.53363		1.2046		Q15459	55	Q15459	Q15459	Splicing factor 3A subunit 1	SF3A1	sp|Q15459|SF3A1_HUMAN Splicing factor 3A subunit 1 OS=Homo sapiens OX=9606 GN=SF3A1 PE=1 SV=1	1	14.4603	1.66233e-05	97.456	82.79	14.46									1	84.6583	0.00444348	84.658					1	78.6526	0.000654868	78.653
P46013	Antigen KI-67	MKI67	1671	1.5961	1.4567	1.0563	1.323	1.1267		1.1228	1.4552			P46013	1671	P46013	P46013	Antigen KI-67	MKI67	sp|P46013|KI67_HUMAN Proliferation marker protein Ki-67 OS=Homo sapiens OX=9606 GN=MKI67 PE=1 SV=2	0.862112	7.96037	3.40933e-12	73.21	73.21	73.21	0.862112	7.96037	3.40933e-12	73.21	0.740079	4.54437	4.93911e-08	62.19	0.795739	5.90586	0.000111406	45.413					0.832626	6.9676	1.10809e-06	60.747	0.840002	7.20165	1.31209e-05
Q14320	Protein FAM50A	FAM50A	5	1.5957	1.2506	1.3298	1.1269	1.4154		0.85331	0.85728			Q14320	5	Q14320	Q14320	Protein FAM50A	FAM50A	sp|Q14320|FA50A_HUMAN Protein FAM50A OS=Homo sapiens OX=9606 GN=FAM50A PE=1 SV=2	1	60.4336	2.37082e-05	84.658	68.456	60.434	1	65.5005	0.000408914	65.5	1	70.9415	0.000177464	70.942	1	74.9442	0.000100047	74.944	1	60.4336	0.00481395	60.434	1	54.1976	0.000944908	54.198	1	84.6583	2.37082e-05
Q13308	Inactive tyrosine-protein kinase 7	PTK7	835	1.5952	1.1603	1.2458	1.0893	1.298		1.9237	1.942	0.8748	0.81921	Q13308	835	Q13308	Q13308	Inactive tyrosine-protein kinase 7	PTK7	sp|Q13308|PTK7_HUMAN Inactive tyrosine-protein kinase 7 OS=Homo sapiens OX=9606 GN=PTK7 PE=1 SV=2	1	54.2757	3.87486e-11	113.72	113.72	54.276	1	99.927	1.78058e-07	99.927	1	113.724	3.87486e-11	113.72	1	70.5287	7.29879e-05	70.529					1	87.0829	9.13222e-06	87.083	1	70.2596	7.68799e-05
P19387	DNA-directed RNA polymerase II subunit RPB3	POLR2C	81	1.5949	0.75162						0.84159			P19387	81	P19387	P19387	DNA-directed RNA polymerase II subunit RPB3	POLR2C	sp|P19387|RPB3_HUMAN DNA-directed RNA polymerase II subunit RPB3 OS=Homo sapiens OX=9606 GN=POLR2C PE=1 SV=2	1	29.384	0.000162376	46.621	37.574	29.384																					1	29.384	0.00314772
Q9NXV2	BTB/POZ domain-containing protein KCTD5	KCTD5	223	1.5936	1.5091	1.5182	0.27388	1.0182	1.2596	0.85485	0.89645			Q9NXV2	223	Q9NXV2	Q9NXV2	BTB/POZ domain-containing protein KCTD5	KCTD5	sp|Q9NXV2|KCTD5_HUMAN BTB/POZ domain-containing protein KCTD5 OS=Homo sapiens OX=9606 GN=KCTD5 PE=1 SV=1	0.973311	15.6192	9.93808e-40	151.39	151.39	142.94	0.947231	12.5408	2.32424e-19	121.51	0.624092	2.20167	3.28115e-05	54.143	0.973311	15.6192	5.56605e-35	142.94	0.858807	7.84084	3.57693e-14	110.74	0.950515	12.8349	9.93808e-40	151.39	0.72828	4.28176	3.96965e-26
Q09666	Neuroblast differentiation-associated protein AHNAK	AHNAK	3164	1.5934		1.6585	1.5002	1.2445		1.4368	1.1003	2.6632		Q09666	3164	Q09666	Q09666	Neuroblast differentiation-associated protein AHNAK	AHNAK	sp|Q09666|AHNK_HUMAN Neuroblast differentiation-associated protein AHNAK OS=Homo sapiens OX=9606 GN=AHNAK PE=1 SV=2	1	79.9753	7.81065e-23	125.12	105.03	115.15	1	70.4361	4.5504e-17	112.82	1	79.9753	5.03821e-18	115.15	1	78.0333	7.81065e-23	125.12	0.999909	40.4215	0.00107738	58.577	1	75.0668	5.03821e-18	115.15	0.99991	40.4734	0.000213174
Q5VTB9	E3 ubiquitin-protein ligase RNF220	RNF220	451	1.5921	1.4957	1.1793	1.1303	1.5316	1.0968	0.90853	0.76426	1.1602	1.3396	Q5VTB9	451	Q5VTB9	Q5VTB9	E3 ubiquitin-protein ligase RNF220	RNF220	sp|Q5VTB9|RN220_HUMAN E3 ubiquitin-protein ligase RNF220 OS=Homo sapiens OX=9606 GN=RNF220 PE=1 SV=1	1	114.726	1.24985e-35	147.26	122.01	147.26	0.999969	45.1085	1.81294e-05	52.061	1	70.8478	9.19756e-19	98.121	1	97.9329	9.76934e-29	124.14	1	67.8322	2.78722e-16	86.551	1	83.4763	3.54307e-16	103.9	0.999998	57.6052	2.0869e-12
P78310	Coxsackievirus and adenovirus receptor	CXADR	360	1.5921								1.2212	1.1649	P78310	360	P78310	P78310	Coxsackievirus and adenovirus receptor	CXADR	sp|P78310|CXAR_HUMAN Coxsackievirus and adenovirus receptor OS=Homo sapiens OX=9606 GN=CXADR PE=1 SV=1	1	30.3312	1.30952e-05	101.39	101.39	30.331
Q14258	E3 ubiquitin/ISG15 ligase TRIM25	TRIM25	301	1.591	0.97682	1.3757	1.3479	0.96205	1.01	0.80382	0.66767			Q14258	301	Q14258	Q14258	E3 ubiquitin/ISG15 ligase TRIM25	TRIM25	sp|Q14258|TRI25_HUMAN E3 ubiquitin/ISG15 ligase TRIM25 OS=Homo sapiens OX=9606 GN=TRIM25 PE=1 SV=2	1	28.7081	0.00247252	57.347	50.688	28.708	1	31.7579	0.0162048	31.758	1	57.3472	0.00247252	57.347	1	49.4658	0.00357486	49.466	1	28.7081	0.0201879	28.708	1	50.4517	0.00322376	50.452	1	47.559	0.00425393
Q01085	Nucleolysin TIA-1 isoform p40;Nucleolysin TIAR	TIA1;TIAL1	88;90	1.5898		2.1188		1.4535		0.97558			0.85933	P31483;Q01085	88;90	P31483;Q01085	Q01085	Nucleolysin TIA-1 isoform p40;Nucleolysin TIAR	TIA1;TIAL1	sp|P31483|TIA1_HUMAN Nucleolysin TIA-1 isoform p40 OS=Homo sapiens OX=9606 GN=TIA1 PE=1 SV=3;sp|Q01085|TIAR_HUMAN Nucleolysin TIAR OS=Homo sapiens OX=9606 GN=TIAL1 PE=1 SV=1	0.88066	8.68023	0.000969832	114.86	56.347	114.86	0.5	0	0.00410904	53.683					0.5	0	0.000969832	72.79					0.5	0	0.0709783	14.687
P16403	Histone H1.4;Histone H1.3;Histone H1.2	HIST1H1E;HIST1H1D;HIST1H1C	63;64;63	1.5892	1.1391	1.0695	1.1195	1.1348	1.127	0.84622	0.90096			P10412;P16402;P16403	63;64;63	P10412;P16403	P16403	Histone H1.4;Histone H1.3;Histone H1.2	HIST1H1E;HIST1H1D;HIST1H1C	sp|P10412|H14_HUMAN Histone H1.4 OS=Homo sapiens OX=9606 GN=HIST1H1E PE=1 SV=2;sp|P16402|H13_HUMAN Histone H1.3 OS=Homo sapiens OX=9606 GN=HIST1H1D PE=1 SV=2;sp|P16403|H12_HUMAN Histone H1.2 OS=Homo sapiens OX=9606 GN=HIST1H1C PE=1 SV=2	0.990573	20.215	7.47566e-05	110.87	70.87	110.87	0.990573	20.215	7.47566e-05	110.87	0.776443	5.40721	0.00164065	85.862	0.917837	10.4809	0.00151642	87.308	0.861824	7.94987	0.00392882	74.301	0.757201	4.93965	0.0018474	83.456	0.917837	10.4809	0.00151642
O43929	Origin recognition complex subunit 4	ORC4	204;204		1.6353	1.1602		1.1037		1.4007	1.3016		0.94352	O43929;CON__Q2YDI2	204;204	O43929	O43929	Origin recognition complex subunit 4	ORC4	sp|O43929|ORC4_HUMAN Origin recognition complex subunit 4 OS=Homo sapiens OX=9606 GN=ORC4 PE=1 SV=2	1	81.865	0.000684091	101.38	64.934	81.865	1	69.9792	0.00209331	69.979					1	48.7409	0.00383301	48.741					1	69.9792	0.00106676	69.979	1	81.865	0.00105932
Q13151	Heterogeneous nuclear ribonucleoprotein A0	HNRNPA0	154		1.6348									Q13151	154	Q13151	Q13151	Heterogeneous nuclear ribonucleoprotein A0	HNRNPA0	sp|Q13151|ROA0_HUMAN Heterogeneous nuclear ribonucleoprotein A0 OS=Homo sapiens OX=9606 GN=HNRNPA0 PE=1 SV=1	0.798528	5.98076	0.000334845	39.385	35.724	39.385
P21333	Filamin-A	FLNA	781	1.5888	1.7743	1.2002	1.2621	1.1801	1.9168		1.5882			P21333	781	P21333	P21333	Filamin-A	FLNA	sp|P21333|FLNA_HUMAN Filamin-A OS=Homo sapiens OX=9606 GN=FLNA PE=1 SV=4	0.993558	21.8817	0.000659068	66.498	58.088	66.498	0.98511	18.2058	0.0011477	60.301	0.855851	7.73588	0.0163099	29.131	0.993558	21.8817	0.000659068	66.498	0.971484	15.3234	0.00491633	41.598					0.939237	11.8914	0.00526558
P05455	Lupus La protein	SSB	328	1.5883	0.92897		1.2683	1.125	1.1923	0.71769	0.85496	0.85344	0.94885	P05455	328	P05455	P05455	Lupus La protein	SSB	sp|P05455|LA_HUMAN Lupus La protein OS=Homo sapiens OX=9606 GN=SSB PE=1 SV=2	0.999103	30.4683	1.63268e-94	235.73	200.72	210.27					0.995556	23.5028	1.23177e-34	185.14	0.997192	25.5044	1.63268e-94	235.73	0.987766	19.0709	1.0639e-12	115.8	0.999103	30.4683	1.74043e-53	210.27	0.959781	13.7774	2.09765e-09
O43818	U3 small nucleolar RNA-interacting protein 2	RRP9	113	1.5865	1.1595	1.1999	0.82858	0.63232	0.82339	0.72957	0.69592			O43818	113	O43818	O43818	U3 small nucleolar RNA-interacting protein 2	RRP9	sp|O43818|U3IP2_HUMAN U3 small nucleolar RNA-interacting protein 2 OS=Homo sapiens OX=9606 GN=RRP9 PE=1 SV=1	1	31.2862	0.00284098	62.303	46.049	31.286	1	24.3433	0.0502298	24.343	1	62.3026	0.00284098	62.303	1	55.5494	0.0233676	55.549	1	31.2862	0.0562788	31.286	1	42.0009	0.0102779	42.001	1	36.4245	0.0170748
O60291	E3 ubiquitin-protein ligase MGRN1	MGRN1	164	1.5858								1.0217	0.96937	O60291	164	O60291	O60291	E3 ubiquitin-protein ligase MGRN1	MGRN1	sp|O60291|MGRN1_HUMAN E3 ubiquitin-protein ligase MGRN1 OS=Homo sapiens OX=9606 GN=MGRN1 PE=1 SV=2	1	80.5221	4.29468e-09	148.78	84.233	80.522
Q7Z3T8	Zinc finger FYVE domain-containing protein 16	ZFYVE16	1372	1.5841		1.568	0.98851	0.84165			1.9399			Q7Z3T8	1372	Q7Z3T8	Q7Z3T8	Zinc finger FYVE domain-containing protein 16	ZFYVE16	sp|Q7Z3T8|ZFY16_HUMAN Zinc finger FYVE domain-containing protein 16 OS=Homo sapiens OX=9606 GN=ZFYVE16 PE=1 SV=3	1	60.1963	0.00115719	60.196	44.61	60.196	1	53.001	0.00180732	53.001	1	51.7258	0.00192254	51.726	1	46.797	0.0032382	46.797									1	60.1963	0.00115719
P53999	Activated RNA polymerase II transcriptional coactivator p15	SUB1	68	1.5835	1.2121	1.5642	1.6425	1.3716		1.1274		1.0419	1.0181	P53999	68	P53999	P53999	Activated RNA polymerase II transcriptional coactivator p15	SUB1	sp|P53999|TCP4_HUMAN Activated RNA polymerase II transcriptional coactivator p15 OS=Homo sapiens OX=9606 GN=SUB1 PE=1 SV=3	1	53.1692	5.02655e-06	107.47	102.85	53.169	1	107.465	5.02655e-06	107.47	1	67.1532	0.00124287	67.153	1	72.6522	0.000554	72.652					1	104.167	0.000312695	104.17
P62847	40S ribosomal protein S24	RPS24	84	1.2294	1.6318	1.1268	1.4997	1.4838		1.0853	0.91497	0.75532	0.79441	P62847	84	P62847	P62847	40S ribosomal protein S24	RPS24	sp|P62847|RS24_HUMAN 40S ribosomal protein S24 OS=Homo sapiens OX=9606 GN=RPS24 PE=1 SV=1	0.575848	1.32786	2.23569e-09	98.694	94.592	84.62	0.533196	0.577524	1.00808e-06	75.961	0.531501	0.54795	1.84265e-05	63.682	0.536803	0.640492	1.29814e-07	87.66					0.545066	0.785014	6.32544e-06	69.729	0.5	0	0.0371514
P23396	40S ribosomal protein S3	RPS3	214	1.5827	1.4748	1.9208	1.9981	2.3458	2.5319	0.80252	0.80006	0.36767	0.39487	P23396	214	P23396	P23396	40S ribosomal protein S3	RPS3	sp|P23396|RS3_HUMAN 40S ribosomal protein S3 OS=Homo sapiens OX=9606 GN=RPS3 PE=1 SV=2	1	126.35	2.39876e-177	255.32	255.32	255.32	1	109.46	3.35954e-159	244.22	1	126.35	2.39876e-177	255.32	1	103.676	4.87532e-142	225.3	1	115.647	2.54039e-128	221.26	1	104.055	1.02842e-127	214.08	1	109.222	4.56018e-128
Q7Z736	Pleckstrin homology domain-containing family H member 3	PLEKHH3	635	1.5826	1.3275	0.98976	1.0408	0.865		0.90813	1.9793	1.5816	1.4787	Q7Z736	635	Q7Z736	Q7Z736	Pleckstrin homology domain-containing family H member 3	PLEKHH3	sp|Q7Z736|PKHH3_HUMAN Pleckstrin homology domain-containing family H member 3 OS=Homo sapiens OX=9606 GN=PLEKHH3 PE=1 SV=2	1	15.7655	4.69991e-08	76.82	76.82	15.766	1	36.7751	2.25588e-06	61.265	1	50.0775	4.69991e-08	76.82	1	30.1071	1.69482e-06	62.469					1	43.5569	0.00358849	43.557	1	15.7655	0.0465378
Q16513	Serine/threonine-protein kinase N2	PKN2	247	1.5791	0.97503	1.1875		1.1583		0.7743	1.2872			Q16513	247	Q16513	Q16513	Serine/threonine-protein kinase N2	PKN2	sp|Q16513|PKN2_HUMAN Serine/threonine-protein kinase N2 OS=Homo sapiens OX=9606 GN=PKN2 PE=1 SV=1	1	39.9181	0.00189379	65.5	48.663	39.918	1	65.5005	0.00189379	65.5					1	65.5005	0.00189379	65.5					1	45.8792	0.00582731	45.879	1	39.9181	0.0083769
P18124	60S ribosomal protein L7	RPL7	148	1.5791								0.72457	0.73508	P18124	148	P18124	P18124	60S ribosomal protein L7	RPL7	sp|P18124|RL7_HUMAN 60S ribosomal protein L7 OS=Homo sapiens OX=9606 GN=RPL7 PE=1 SV=1	0.999396	32.1845	1.25968e-09	109.22	109.22	109.22
Q09666	Neuroblast differentiation-associated protein AHNAK	AHNAK	2993	1.5789		0.84747								Q09666	2993	Q09666	Q09666	Neuroblast differentiation-associated protein AHNAK	AHNAK	sp|Q09666|AHNK_HUMAN Neuroblast differentiation-associated protein AHNAK OS=Homo sapiens OX=9606 GN=AHNAK PE=1 SV=2	1	44.4259	0.0128269	44.426	32.28	44.426	1	44.4259	0.0128269	44.426
P09874	Poly [ADP-ribose] polymerase 1	PARP1	425	1.5739	1.2374	1.2486	1.4063	1.3461		1.2314	1.0108	0.69676	0.65252	P09874	425	P09874	P09874	Poly [ADP-ribose] polymerase 1	PARP1	sp|P09874|PARP1_HUMAN Poly [ADP-ribose] polymerase 1 OS=Homo sapiens OX=9606 GN=PARP1 PE=1 SV=4	0.999999	59.1028	4.85381e-06	107.11	107.11	102.73	0.997008	25.228	0.00717391	43.592	0.999	29.997	0.000382273	53.828	0.999804	37.087	0.000122812	60.918					0.997927	26.8244	0.00372831	50.305	0.964574	14.3501	0.0375875
O43684	Mitotic checkpoint protein BUB3	BUB3	217	1.5711	2.0642	1.3618	1.6632	1.573	1.405	1.6138	1.3366			O43684	217	O43684	O43684	Mitotic checkpoint protein BUB3	BUB3	sp|O43684|BUB3_HUMAN Mitotic checkpoint protein BUB3 OS=Homo sapiens OX=9606 GN=BUB3 PE=1 SV=1	0.904458	9.76196	1.06195e-103	205.88	180.16	142.08	0.581663	1.43146	5.56815e-35	158.81	0.579737	1.39711	1.28965e-33	150.12	0.624159	2.20292	5.10368e-52	194.5	0.602892	1.81331	4.36338e-63	205.88	0.585872	1.50668	1.06195e-103	205.88	0.586458	1.51718	2.94233e-56
Q9P2D1	Chromodomain-helicase-DNA-binding protein 7	CHD7	2543	1.5696	2.1368	2.5519	2.5851	1.7666		0.9188	1.5717			Q9P2D1	2543	Q9P2D1	Q9P2D1	Chromodomain-helicase-DNA-binding protein 7	CHD7	sp|Q9P2D1|CHD7_HUMAN Chromodomain-helicase-DNA-binding protein 7 OS=Homo sapiens OX=9606 GN=CHD7 PE=1 SV=3	1	50.2148	2.03132e-06	60.398	60.398	50.215	1	50.8512	2.1626e-05	50.851	1	60.0362	2.77482e-06	60.036	1	52.3587	1.85319e-05	52.359					1	33.4247	0.000672937	33.425	1	50.2148	2.88938e-05
Q08752	Peptidyl-prolyl cis-trans isomerase D	PPID	331	1.5684	1.1886		1.8581							Q08752	331	Q08752	Q08752	Peptidyl-prolyl cis-trans isomerase D	PPID	sp|Q08752|PPID_HUMAN Peptidyl-prolyl cis-trans isomerase D OS=Homo sapiens OX=9606 GN=PPID PE=1 SV=3	0.924304	10.8674	0.00604448	66.435	51.768	66.435					0.924304	10.8674	0.00604448	66.435
P46778	60S ribosomal protein L21	RPL21	50	1.5682	1.7549	1.2398		1.3216						P46778	50	P46778	P46778	60S ribosomal protein L21	RPL21	sp|P46778|RL21_HUMAN 60S ribosomal protein L21 OS=Homo sapiens OX=9606 GN=RPL21 PE=1 SV=2	0.999674	34.8729	0.000549466	67.93	67.93	67.93	0.999674	34.8729	0.000549466	67.93					0.968075	14.8178	0.0348956	55.314
P21333	Filamin-A	FLNA	383	1.5668				1.2532		0.59761				P21333	383	P21333	P21333	Filamin-A	FLNA	sp|P21333|FLNA_HUMAN Filamin-A OS=Homo sapiens OX=9606 GN=FLNA PE=1 SV=4	0.999992	51.2299	1.74251e-05	52.898	52.898	52.898									0.999992	51.2299	1.74251e-05	52.898					0.998469	28.1442	0.000867373	30.585
Q92547	DNA topoisomerase 2-binding protein 1	TOPBP1	1289		1.6216									Q92547	1289	Q92547	Q92547	DNA topoisomerase 2-binding protein 1	TOPBP1	sp|Q92547|TOPB1_HUMAN DNA topoisomerase 2-binding protein 1 OS=Homo sapiens OX=9606 GN=TOPBP1 PE=1 SV=3	0.986392	18.6024	0.0036961	32.507	26.39	32.507
REV__Q9Y2J2					1.6182		1.0897	0.91076		1.1454	1.177					REV__Q9Y2J2	REV__Q9Y2J2				0.999998	57.5896	0.00472612	57.59	56.729	57.59					0.999983	47.6028	0.01221	47.603	0.999983	47.6028	0.01221	47.603					0.999998	57.5896	0.00472612	57.59	0.999983	47.8234	0.0118768
Q7Z5G4	Golgin subfamily A member 7	GOLGA7	103	1.566	1.3167	1.6442	1.8353	1.3372	1.366	1.1642	1.5976	1.031	1.0206	Q7Z5G4	103	Q7Z5G4	Q7Z5G4	Golgin subfamily A member 7	GOLGA7	sp|Q7Z5G4|GOGA7_HUMAN Golgin subfamily A member 7 OS=Homo sapiens OX=9606 GN=GOLGA7 PE=1 SV=2	1	83.0386	2.21303e-28	121.47	121.47	83.039	1	96.7085	1.11951e-18	96.708	1	112.451	5.72596e-23	112.45	1	121.465	2.21303e-28	121.47	1	83.0386	4.12896e-16	83.039	1	107.741	1.47431e-22	107.74	1	80.6697	9.12643e-13
Q9NR30	Nucleolar RNA helicase 2	DDX21	75		1.6175									Q9NR30	75	Q9NR30	Q9NR30	Nucleolar RNA helicase 2	DDX21	sp|Q9NR30|DDX21_HUMAN Nucleolar RNA helicase 2 OS=Homo sapiens OX=9606 GN=DDX21 PE=1 SV=5	0.524981	0.436158	0.00554466	36.193	36.193	36.193
O75475	PC4 and SFRS1-interacting protein	PSIP1	6	1.5643	1.9405	2.0605	2.094	2.3598	2.6145	1.4655	1.3758	0.85494	0.85305	O75475	6	O75475	O75475	PC4 and SFRS1-interacting protein	PSIP1	sp|O75475|PSIP1_HUMAN PC4 and SFRS1-interacting protein OS=Homo sapiens OX=9606 GN=PSIP1 PE=1 SV=1	1	101.564	6.20341e-07	110.08	101.56	110.08	1	87.5898	2.36013e-05	96.103	1	83.6564	4.90378e-05	98.04	1	86.8879	2.54426e-05	95.401	1	74.7293	0.000305738	78.903	1	101.564	6.20341e-07	110.08	1	66.631	0.000428201
Q01804	OTU domain-containing protein 4	OTUD4	323	1.5369	1.6167	1.7728	1.8048	0.94475	0.95814	0.9712	0.69159			Q01804	323	Q01804	Q01804	OTU domain-containing protein 4	OTUD4	sp|Q01804|OTUD4_HUMAN OTU domain-containing protein 4 OS=Homo sapiens OX=9606 GN=OTUD4 PE=1 SV=4	0.563169	1.10325	3.97798e-87	174.7	167.59	155.76	0.5	0	3.97798e-87	174.7	0.549309	0.859378	5.58584e-52	139.79	0.547739	0.831845	2.47461e-63	154.6	0.5	0	0.000145393	42.746	0.545007	0.783976	7.21632e-52	137.42	0.5	0	0.00419421
P62263	40S ribosomal protein S14	RPS14	63	1.5636	1.6563	1.8903	1.9246	1.6532		0.82471	0.92369		0.84751	P62263	63	P62263	P62263	40S ribosomal protein S14	RPS14	sp|P62263|RS14_HUMAN 40S ribosomal protein S14 OS=Homo sapiens OX=9606 GN=RPS14 PE=1 SV=3	1	42.9036	2.38883e-55	148.88	148.88	42.904	1	127.798	2.22891e-35	127.8	1	60.0362	2.38883e-55	148.88	1	148.878	2.38883e-55	148.88					1	141.471	1.13634e-44	141.47	1	42.9036	1.05663e-06
P62312	U6 snRNA-associated Sm-like protein LSm6	LSM6	5		1.6153	1.2949		1.2128		1.4007				P62312	5	P62312	P62312	U6 snRNA-associated Sm-like protein LSm6	LSM6	sp|P62312|LSM6_HUMAN U6 snRNA-associated Sm-like protein LSm6 OS=Homo sapiens OX=9606 GN=LSM6 PE=1 SV=1	0.998892	29.5508	0.0237543	29.551	21.064	29.551	0.996938	25.126	0.038879	25.126					0.998892	29.5508	0.0237543	29.551					0.994749	22.775	0.0477259	22.775
P07305	Histone H1.0;Histone H1.0, N-terminally processed	H1F0	59	1.5631	1.6455	1.6293	1.6267	1.7395	2.212	1.1262	1.0738	0.49863	0.47106	P07305	59	P07305	P07305	Histone H1.0;Histone H1.0, N-terminally processed	H1F0	sp|P07305|H10_HUMAN Histone H1.0 OS=Homo sapiens OX=9606 GN=H1F0 PE=1 SV=3	1	163.891	1.10011e-62	206.46	190.52	206.46	1	163.891	1.10011e-62	206.46	1	110.337	1.07418e-27	147.35	1	112.7	2.29166e-28	148.72	1	76.5167	1.60241e-07	100.4	1	125.017	6.80972e-37	171.76	1	127.491	5.40648e-44
P23258	Tubulin gamma-1 chain;Tubulin gamma-2 chain	TUBG1;TUBG2	287;287	1.5631	1.2617	1.25	1.3343	0.9919	1.6595	1.2492	1.9999	1.2047	1.3453	P23258;Q9NRH3	287;287	P23258	P23258	Tubulin gamma-1 chain;Tubulin gamma-2 chain	TUBG1;TUBG2	sp|P23258|TBG1_HUMAN Tubulin gamma-1 chain OS=Homo sapiens OX=9606 GN=TUBG1 PE=1 SV=2;sp|Q9NRH3|TBG2_HUMAN Tubulin gamma-2 chain OS=Homo sapiens OX=9606 GN=TUBG2 PE=2 SV=1	1	41.5399	0.000495147	122.96	81.533	41.54	1	90.1082	0.000529405	90.108	1	79.1482	0.00091204	79.148	1	91.6364	0.000495147	91.636	1	41.5399	0.0200243	41.54	1	81.7707	0.000759817	81.771	1	59.6454	0.00278879
REV__P23229					1.6138	1.3563		2.2328			0.90834					REV__P23229	REV__P23229				0.556367	0.983371	0.00510792	30.133	30.133	23.138	0.514643	0.254455	0.0588075	16.139					0.556367	0.983371	0.0259007	23.138									0.523048	0.400673	0.00510792
Q9BRQ8	Apoptosis-inducing factor 2	AIFM2	64		1.6133	0.93121	1.2611			0.78244	0.97264			Q9BRQ8	64	Q9BRQ8	Q9BRQ8	Apoptosis-inducing factor 2	AIFM2	sp|Q9BRQ8|AIFM2_HUMAN Apoptosis-inducing factor 2 OS=Homo sapiens OX=9606 GN=AIFM2 PE=1 SV=1	0.60367	1.82743	0.00639749	78.334	39.313	65.246	0.579399	1.39108	0.00639749	58.981	0.60367	1.82743	0.0153247	65.246									0.585935	1.50781	0.00964887	78.334	0.555756	0.972632	0.0150864
P38159	RNA-binding motif protein, X chromosome;RNA-binding motif protein, X chromosome, N-terminally processed;RNA binding motif protein, X-linked-like-1	RBMX;RBMXL1	217;217	1.5626	1.4736	1.244	1.1391	1.4377	1.2178	0.63939	0.95762	0.70722	0.62712	P38159;Q96E39	217;217	P38159;Q96E39	P38159	RNA-binding motif protein, X chromosome;RNA-binding motif protein, X chromosome, N-terminally processed;RNA binding motif protein, X-linked-like-1	RBMX;RBMXL1	sp|P38159|RBMX_HUMAN RNA-binding motif protein, X chromosome OS=Homo sapiens OX=9606 GN=RBMX PE=1 SV=3;sp|Q96E39|RMXL1_HUMAN RNA binding motif protein, X-linked-like-1 OS=Homo sapiens OX=9606 GN=RBMXL1 PE=1 SV=1	1	95.6505	1.11298e-06	95.651	90.746	95.651	1	70.8885	0.000172112	70.889	1	57.4919	7.16266e-05	77.776	1	54.0901	0.00114176	54.09	1	95.6505	1.11298e-06	95.651	1	44.7647	0.000293259	67.964	1	68.9722	0.000251484
Q9Y520	Protein PRRC2C	PRRC2C	1320	1.5624	1.2367	1.2708	1.4581		1.2257					Q9Y520	1320	Q9Y520	Q9Y520	Protein PRRC2C	PRRC2C	sp|Q9Y520|PRC2C_HUMAN Protein PRRC2C OS=Homo sapiens OX=9606 GN=PRRC2C PE=1 SV=4	1	25.1373	0.00717342	57.177	39.938	25.137	1	57.1775	0.00717342	57.177	1	33.7966	0.0288303	33.797	1	41.0291	0.0406153	41.029	1	25.1373	0.0559071	25.137
O95292	Vesicle-associated membrane protein-associated protein B/C	VAPB	155	1.5598	1.2261	1.1699	1.1205	0.81544	0.97624	1.2352	1.2574	2.1528	1.9609	O95292	155	O95292	O95292	Vesicle-associated membrane protein-associated protein B/C	VAPB	sp|O95292|VAPB_HUMAN Vesicle-associated membrane protein-associated protein B/C OS=Homo sapiens OX=9606 GN=VAPB PE=1 SV=3	1	81.2872	2.28313e-38	138.3	138.3	118.52	1	74.5165	3.92174e-30	135.04	1	63.7388	5.79658e-30	134.07	1	76.6484	2.28313e-38	138.3	1	64.3632	2.58592e-22	116.98	1	63.5015	4.05785e-17	109.66	1	69.6403	4.50334e-17
P49189	4-trimethylaminobutyraldehyde dehydrogenase	ALDH9A1	68	1.5594		1.541	1.4215	1.1079						P49189	68	P49189	P49189	4-trimethylaminobutyraldehyde dehydrogenase	ALDH9A1	sp|P49189|AL9A1_HUMAN 4-trimethylaminobutyraldehyde dehydrogenase OS=Homo sapiens OX=9606 GN=ALDH9A1 PE=1 SV=3	1	67.113	0.00167322	67.113	67.113	67.113	1	49.3505	0.00434268	49.35	1	67.113	0.00167322	67.113	1	48.7409	0.00460336	48.741
Q13308	Inactive tyrosine-protein kinase 7	PTK7	1069	1.5574	1.2374	1.3795	1.12	1.3928	1.4681	2.6471	2.676	0.7208	0.66899	Q13308	1069	Q13308	Q13308	Inactive tyrosine-protein kinase 7	PTK7	sp|Q13308|PTK7_HUMAN Inactive tyrosine-protein kinase 7 OS=Homo sapiens OX=9606 GN=PTK7 PE=1 SV=2	1	73.3147	7.54843e-22	107.78	102.45	73.315	1	88.0904	1.12559e-15	88.09	1	87.1557	1.30829e-15	87.156	1	107.78	7.54843e-22	107.78	1	73.3147	7.65297e-12	73.315	1	91.2759	5.02931e-16	91.276	1	90.2205	7.09224e-16
Q9BXF6	Rab11 family-interacting protein 5	RAB11FIP5	583	1.5559	1.5191	1.905	1.855	0.94358	0.86293	1.6196	1.7188		1.8147	Q9BXF6	583	Q9BXF6	Q9BXF6	Rab11 family-interacting protein 5	RAB11FIP5	sp|Q9BXF6|RFIP5_HUMAN Rab11 family-interacting protein 5 OS=Homo sapiens OX=9606 GN=RAB11FIP5 PE=1 SV=1	1	51.029	4.49243e-218	276.36	276.36	51.029	1	20.1992	3.45186e-196	263.71	1	128.124	2.16925e-176	252.6	1	20.4263	4.49243e-218	276.36	1	51.029	1.3085e-114	204.96	1	70.315	3.22665e-176	250.92	1	60.7469	4.34778e-76
Q96G28	Cilia- and flagella-associated protein 36	CFAP36	89	1.5558							1.07			Q96G28	89	Q96G28	Q96G28	Cilia- and flagella-associated protein 36	CFAP36	sp|Q96G28|CFA36_HUMAN Cilia- and flagella-associated protein 36 OS=Homo sapiens OX=9606 GN=CFAP36 PE=1 SV=2	0.999998	56.472	3.62722e-11	61.394	53.396	61.394																					0.999615	34.1464	0.000398815
Q9UNM6	26S proteasome non-ATPase regulatory subunit 13	PSMD13	161	1.5557	1.6445	1.3262	1.3267	1.5108		1.8595	1.7826	0.61639		Q9UNM6	161	Q9UNM6	Q9UNM6	26S proteasome non-ATPase regulatory subunit 13	PSMD13	sp|Q9UNM6|PSD13_HUMAN 26S proteasome non-ATPase regulatory subunit 13 OS=Homo sapiens OX=9606 GN=PSMD13 PE=1 SV=2	1	127.902	4.13938e-61	179.95	175.5	179.95	1	115.639	1.9913e-49	154.55	1	101.733	1.7724e-49	155.01	1	127.902	4.13938e-61	179.95					1	68.9263	9.98149e-18	114.02	0.999992	50.8563	1.63381e-07
Q16625	Occludin	OCLN	276	1.5554	1.3203	1.2051	1.19	1.0399	1.2004	1.8782		0.48591	0.4946	Q16625	276	Q16625	Q16625	Occludin	OCLN	sp|Q16625|OCLN_HUMAN Occludin OS=Homo sapiens OX=9606 GN=OCLN PE=1 SV=1	0.999998	58.1664	2.62758e-13	92.147	76.628	59.418	0.999998	58.1664	1.77931e-08	63.63	0.999998	56.9574	2.62758e-13	80.359	0.999994	52.2699	0.00299268	57.164	0.998986	29.9356	0.0219781	29.936	0.996468	24.5047	0.0412397	24.696
P22223	Cadherin-3	CDH3	684	1.5549	0.78468	0.88287	0.83325	0.97515	1.0267	1.8592	2.0331	1.7276	1.3208	P22223	684	P22223	P22223	Cadherin-3	CDH3	sp|P22223|CADH3_HUMAN Cadherin-3 OS=Homo sapiens OX=9606 GN=CDH3 PE=1 SV=2	1	101.208	4.00333e-25	107.18	107.18	101.21	1	99.2153	3.67275e-06	99.215	1	97.2141	5.02486e-06	97.214	1	96.6404	5.41252e-06	96.64	1	99.4999	3.48045e-06	99.5	1	107.176	1.33096e-08	107.18	1	51.0919	0.00297446
P10586	Receptor-type tyrosine-protein phosphatase F	PTPRF	1295	1.5532	1.3805	1.4148	1.2794	1.3617		1.1526	1.4803			P10586	1295	P10586	P10586	Receptor-type tyrosine-protein phosphatase F	PTPRF	sp|P10586|PTPRF_HUMAN Receptor-type tyrosine-protein phosphatase F OS=Homo sapiens OX=9606 GN=PTPRF PE=1 SV=2	1	38.8431	3.85828e-05	70.41	57.85	38.843	0.999953	43.312	0.000618994	49.216	0.996715	24.821	0.00922246	28.546	1	38.8431	3.85828e-05	70.41					0.936949	11.7202	0.0725675	13.791	0.999184	30.8784	0.0326454
P07947	Tyrosine-protein kinase Yes	YES1	235	1.5528	1.2768	2.5946	0.56742	0.78391		4.1939		1.0684	1.1436	P07947	235	P07947	P07947	Tyrosine-protein kinase Yes	YES1	sp|P07947|YES_HUMAN Tyrosine-protein kinase Yes OS=Homo sapiens OX=9606 GN=YES1 PE=1 SV=3	0.999581	33.7793	1.89637e-06	113.47	85.268	113.47	0.999581	33.7793	1.89637e-06	113.47	0.989242	19.6357	0.000395011	76.655	0.990434	20.1512	0.00120162	79.693	0.761666	5.04578	0.0249127	43.68	0.785206	5.62961	0.0474858	33.057
Q14669	E3 ubiquitin-protein ligase TRIP12	TRIP12	1668	1.5524			0.81748			0.91423				Q14669	1668	Q14669	Q14669	E3 ubiquitin-protein ligase TRIP12	TRIP12	sp|Q14669|TRIPC_HUMAN E3 ubiquitin-protein ligase TRIP12 OS=Homo sapiens OX=9606 GN=TRIP12 PE=1 SV=1	1	28.65	2.06505e-42	164.09	145.03	28.65					1	42.6402	0.000159977	42.64									0.946376	12.467	2.06505e-42	164.09	1	28.65	0.0311773
Q15149	Plectin	PLEC	143	1.5517	1.4598	1.3538	1.5879	1.191	0.85628	0.94392	1.009			Q15149	143	Q15149	Q15149	Plectin	PLEC	sp|Q15149|PLEC_HUMAN Plectin OS=Homo sapiens OX=9606 GN=PLEC PE=1 SV=3	1	60.6023	8.57798e-17	105.79	105.79	60.602	1	95.6659	3.56991e-13	95.666	1	92.9925	8.83311e-13	93.776	1	57.0451	4.0263e-09	75.608	1	60.6023	3.18807e-07	63.184	1	65.1596	1.57375e-11	87.352	1	44.3823	0.000195959
Q9H3U1	Protein unc-45 homolog A	UNC45A	173	1.5513	0.66942	1.1486	1.1952	0.95641			1.1913	1.1936	1.3096	Q9H3U1	173	Q9H3U1	Q9H3U1	Protein unc-45 homolog A	UNC45A	sp|Q9H3U1|UN45A_HUMAN Protein unc-45 homolog A OS=Homo sapiens OX=9606 GN=UNC45A PE=1 SV=1	1	23.4683	0.000106473	101.93	101.93	23.468	1	28.3607	0.0187812	28.361	1	49.6315	0.00232333	49.632	1	57.4014	0.0314945	57.401									1	23.4683	0.0388272
Q9Y3A5	Ribosome maturation protein SBDS	SBDS	98	1.551	1.8673	1.5331	1.438	1.557	1.4696	1.1577	1.199			Q9Y3A5	98	Q9Y3A5	Q9Y3A5	Ribosome maturation protein SBDS	SBDS	sp|Q9Y3A5|SBDS_HUMAN Ribosome maturation protein SBDS OS=Homo sapiens OX=9606 GN=SBDS PE=1 SV=4	1	34.599	2.61417e-15	123.76	103.92	34.599	1	123.758	2.61417e-15	123.76	1	59.7088	0.000130017	78.069	1	47.5452	4.60137e-05	85.734	1	34.599	0.00701773	34.599	1	49.4818	0.000705404	65.467	1	89.6238	2.46735e-05
Q9BUP3	Oxidoreductase HTATIP2	HTATIP2	114	1.55							0.75443			Q9BUP3	114	Q9BUP3	Q9BUP3	Oxidoreductase HTATIP2	HTATIP2	sp|Q9BUP3|HTAI2_HUMAN Oxidoreductase HTATIP2 OS=Homo sapiens OX=9606 GN=HTATIP2 PE=1 SV=2	0.9898	19.8696	0.0133843	56.563	43.21	56.563																					0.870066	8.2583	0.0727529
P57076	UPF0769 protein C21orf59	C21orf59	196;196	1.5485	1.3419	1.3405	1.3149			0.60155	0.61529			P57076;F8VZ95	196;196	P57076	P57076	UPF0769 protein C21orf59	C21orf59	sp|P57076|CF298_HUMAN Cilia- and flagella-associated protein 298 OS=Homo sapiens OX=9606 GN=CFAP298 PE=1 SV=1;tr|F8VZ95|F8VZ95_HUMAN Uncharacterized protein (Fragment) OS=Homo sapiens OX=9606 PE=4 SV=1	1	39.7463	0.000110559	67.93	62.26	39.746	1	27.4585	0.0178464	27.458	1	60.4007	0.000267437	60.401									1	46.3177	0.00877996	46.318	1	39.7463	0.0160983
P55786	Puromycin-sensitive aminopeptidase;Puromycin-sensitive aminopeptidase-like protein	NPEPPS;NPEPPSL1	155;155		1.6004									P55786;A6NEC2	155;155	P55786	P55786	Puromycin-sensitive aminopeptidase;Puromycin-sensitive aminopeptidase-like protein	NPEPPS;NPEPPSL1	sp|P55786|PSA_HUMAN Puromycin-sensitive aminopeptidase OS=Homo sapiens OX=9606 GN=NPEPPS PE=1 SV=2;sp|A6NEC2|PSAL_HUMAN Puromycin-sensitive aminopeptidase-like protein OS=Homo sapiens OX=9606 GN=NPEPPSL1 PE=2 SV=3	0.675175	3.17766	0.00139899	57.52	51.334	57.52
Q16659	Mitogen-activated protein kinase 6	MAPK6	4	1.5482	0.74229		0.76311	0.8125		0.82362				Q16659	4	Q16659	Q16659	Mitogen-activated protein kinase 6	MAPK6	sp|Q16659|MK06_HUMAN Mitogen-activated protein kinase 6 OS=Homo sapiens OX=9606 GN=MAPK6 PE=1 SV=1	1	57.5196	4.48092e-14	106.94	106.94	57.52					1	57.5196	1.43877e-05	57.52	1	73.4642	5.57243e-08	73.464					1	106.945	4.48092e-14	106.94
P27816	Microtubule-associated protein 4	MAP4	1015	1.5473	1.3851	1.5912	1.4245	1.2136						P27816	1015	P27816	P27816	Microtubule-associated protein 4	MAP4	sp|P27816|MAP4_HUMAN Microtubule-associated protein 4 OS=Homo sapiens OX=9606 GN=MAP4 PE=1 SV=3	0.999999	59.4855	2.93589e-07	80.719	61.716	80.719	0.999999	59.4855	2.93589e-07	80.719	0.999741	35.8575	0.00043753	45.438	0.999575	33.7172	0.000572706	43.297
Q8N370	Large neutral amino acids transporter small subunit 4	SLC43A2	283	1.5473	1.2512		1.9198	1.1373		0.83501	0.70698	0.84474		Q8N370	283	Q8N370	Q8N370	Large neutral amino acids transporter small subunit 4	SLC43A2	sp|Q8N370|LAT4_HUMAN Large neutral amino acids transporter small subunit 4 OS=Homo sapiens OX=9606 GN=SLC43A2 PE=1 SV=1	1	171.704	3.23113e-17	190.66	104.99	190.66					1	100.21	6.18279e-10	113.35	1	111.165	1.99172e-13	124.3					1	93.4409	2.61201e-09	106.58	1	118.527	3.23113e-17
Q13347	Eukaryotic translation initiation factor 3 subunit I	EIF3I	141	1.5468	0.81102	1.0541	1.0934	1.0047		0.50506		0.81318	0.9648	Q13347	141	Q13347	Q13347	Eukaryotic translation initiation factor 3 subunit I	EIF3I	sp|Q13347|EIF3I_HUMAN Eukaryotic translation initiation factor 3 subunit I OS=Homo sapiens OX=9606 GN=EIF3I PE=1 SV=1	0.999181	30.8638	2.79107e-07	80.156	66.982	57.798	0.993143	21.6091	9.29725e-06	56.428	0.970805	15.2182	2.71311e-06	60.034	0.914457	10.2898	0.00111333	35.834					0.997207	25.5278	2.79107e-07	61.959	0.991004	20.4201	4.60692e-06
P16220	Cyclic AMP-responsive element-binding protein 1	CREB1	333	1.5464	1.123	1.2385	0.99479	1.242	1.6534		0.97572			P16220	333	P16220	P16220	Cyclic AMP-responsive element-binding protein 1	CREB1	sp|P16220|CREB1_HUMAN Cyclic AMP-responsive element-binding protein 1 OS=Homo sapiens OX=9606 GN=CREB1 PE=1 SV=2	0.99992	40.9701	0.00649876	46.891	46.891	46.891	0.99992	40.9701	0.0068397	46.891	0.58613	1.5113	0.0068397	43.512	0.999771	36.3923	0.00895763	44.318	0.991832	20.8432	0.0424564	26.063					0.999618	34.1725	0.0202789
P63096	Guanine nucleotide-binding protein G(i) subunit alpha-2;Guanine nucleotide-binding protein G(i) subunit alpha-1	GNAI2;GNAI1	350;349	1.5445	1.2369	2.5658	1.2123	1.1096		1.7956	0.80533	1.4525	1.4145	P04899;P63096	350;349	P04899;P63096	P63096	Guanine nucleotide-binding protein G(i) subunit alpha-2;Guanine nucleotide-binding protein G(i) subunit alpha-1	GNAI2;GNAI1	sp|P04899|GNAI2_HUMAN Guanine nucleotide-binding protein G(i) subunit alpha-2 OS=Homo sapiens OX=9606 GN=GNAI2 PE=1 SV=3;sp|P63096|GNAI1_HUMAN Guanine nucleotide-binding protein G(i) subunit alpha-1 OS=Homo sapiens OX=9606 GN=GNAI1 PE=1 SV=2	1	80.6835	1.68069e-11	125.5	112.46	80.684	1	110.026	9.6112e-05	110.03	1	97.0933	0.0038364	97.093	1	77.2825	0.0203136	77.282					1	125.498	2.09885e-08	125.5	1	80.6835	7.09579e-10
Q9Y6H8	Gap junction alpha-3 protein	GJA3	123	1.5443	1.1043		1.1031	0.95631		0.69909	0.81774			Q9Y6H8	123	Q9Y6H8	Q9Y6H8	Gap junction alpha-3 protein	GJA3	sp|Q9Y6H8|CXA3_HUMAN Gap junction alpha-3 protein OS=Homo sapiens OX=9606 GN=GJA3 PE=1 SV=4	1	59.5133	2.10391e-05	64.136	64.136	59.513					1	44.7342	0.000662878	44.734	1	54.5006	0.00172937	54.501					1	53.1692	0.00188477	53.169	1	59.5133	0.00114431
Q15149	Plectin	PLEC	3887		1.5945						1.1428			Q15149	3887	Q15149	Q15149	Plectin	PLEC	sp|Q15149|PLEC_HUMAN Plectin OS=Homo sapiens OX=9606 GN=PLEC PE=1 SV=3	1	19.211	0.00703853	38.27	28.583	19.211					1	34.9603	0.0490332	34.96													1	19.211	0.0490665
P40763	Signal transducer and activator of transcription 3	STAT3	709	1.5426	1.4161	1.9326				1.3559				P40763	709	P40763	P40763	Signal transducer and activator of transcription 3	STAT3	sp|P40763|STAT3_HUMAN Signal transducer and activator of transcription 3 OS=Homo sapiens OX=9606 GN=STAT3 PE=1 SV=2	0.839561	7.18741	6.02619e-06	58.015	50.482	58.015	0.518399	0.319767	0.000169422	42.041													0.523433	0.407378	0.00230001	41.491
Q14676	Mediator of DNA damage checkpoint protein 1	MDC1	246		1.594									Q14676	246	Q14676	Q14676	Mediator of DNA damage checkpoint protein 1	MDC1	sp|Q14676|MDC1_HUMAN Mediator of DNA damage checkpoint protein 1 OS=Homo sapiens OX=9606 GN=MDC1 PE=1 SV=3	0.99126	20.5467	0.0183869	21.616	21.616	21.616
O00425	Insulin-like growth factor 2 mRNA-binding protein 3	IGF2BP3	26		1.5933	1.5462		1.5752		0.72637				O00425	26	O00425	O00425	Insulin-like growth factor 2 mRNA-binding protein 3	IGF2BP3	sp|O00425|IF2B3_HUMAN Insulin-like growth factor 2 mRNA-binding protein 3 OS=Homo sapiens OX=9606 GN=IGF2BP3 PE=1 SV=2	0.999877	39.1109	0.00286485	39.509	39.509	39.509	0.995698	23.6442	0.00286485	27.947					0.5	0	0.0139419	21.129					0.999877	39.1109	0.0043468	39.509	0.999842	38.0023	0.0396342
Q7Z4S6	Kinesin-like protein KIF21A	KIF21A	1058	1.5421	1.7731	0.83984					1.9156			Q7Z4S6	1058	Q7Z4S6	Q7Z4S6	Kinesin-like protein KIF21A	KIF21A	sp|Q7Z4S6|KI21A_HUMAN Kinesin-like protein KIF21A OS=Homo sapiens OX=9606 GN=KIF21A PE=1 SV=2	0.999606	34.0422	0.000432956	100.48	77.737	100.48	0.999606	34.0422	0.000432956	100.48	0.963551	14.2219	0.0549628	34.685	0.945289	12.3749	0.0162288	48.659					0.99741	25.856	0.00432719	62.14	0.982006	17.3699	0.0029389
P26358	DNA (cytosine-5)-methyltransferase 1	DNMT1	666	1.5413	1.5587	1.8039		1.5335		1.0561	0.94245			P26358	666	P26358	P26358	DNA (cytosine-5)-methyltransferase 1	DNMT1	sp|P26358|DNMT1_HUMAN DNA (cytosine-5)-methyltransferase 1 OS=Homo sapiens OX=9606 GN=DNMT1 PE=1 SV=2	0.970047	14.6808	1.06141e-47	177.63	177.59	23.33	0.93009	10.0103	2.11376e-47	174.95					0.812846	6.37809	1.06141e-47	177.63					0.724863	4.20707	2.11176e-38	151.56	0.970047	14.6808	1.26501e-24
Q9Y3Y2	Chromatin target of PRMT1 protein	CHTOP	226	1.5407	1.4256	1.5679		1.2064		1.0192	1.0303	1.3874		Q9Y3Y2	226	Q9Y3Y2	Q9Y3Y2	Chromatin target of PRMT1 protein	CHTOP	sp|Q9Y3Y2|CHTOP_HUMAN Chromatin target of PRMT1 protein OS=Homo sapiens OX=9606 GN=CHTOP PE=1 SV=2	0.871377	8.30887	3.0702e-22	130.01	123.71	87.001	0.845805	7.39201	3.15788e-15	121.04					0.722649	4.15897	1.85445e-06	90.931					0.871377	8.30887	3.0702e-22	130.01	0.667835	3.03316	2.47217e-08
Q14152	Eukaryotic translation initiation factor 3 subunit A	EIF3A	68	1.5384			1.3911	1.0435	1.1106	1.0865			1.8765	Q14152	68	Q14152	Q14152	Eukaryotic translation initiation factor 3 subunit A	EIF3A	sp|Q14152|EIF3A_HUMAN Eukaryotic translation initiation factor 3 subunit A OS=Homo sapiens OX=9606 GN=EIF3A PE=1 SV=1	0.999945	42.5638	0.000840846	64.121	49.768	64.121					0.993915	22.131	0.0104366	34.898	0.999945	42.5638	0.000840846	64.121	0.980087	16.9214	0.0157421	29.689	0.998325	27.753	0.0053955	40.113
Q9NPA3	Mid1-interacting protein 1	MID1IP1	173	1.5378	1.4056	1.4076	1.5296	1.8995		1.4936	1.284	0.53441	0.45766	Q9NPA3	173	Q9NPA3	Q9NPA3	Mid1-interacting protein 1	MID1IP1	sp|Q9NPA3|M1IP1_HUMAN Mid1-interacting protein 1 OS=Homo sapiens OX=9606 GN=MID1IP1 PE=1 SV=1	1	37.3273	8.21679e-05	117.89	78.585	37.327	1	80.9793	8.21679e-05	80.979	1	70.5516	0.000149153	76.843	1	37.9396	0.00733914	37.94					1	60.4896	0.00113068	60.49	1	37.3273	0.00796275
P61006	Ras-related protein Rab-8A;Ras-related protein Rab-8B	RAB8A;RAB8B	3;3	1.5375	1.9068	1.4582	1.9185	2.5166		1.6974	1.0771	1.0911	0.98985	P61006;Q92930	3;3	P61006	P61006	Ras-related protein Rab-8A;Ras-related protein Rab-8B	RAB8A;RAB8B	sp|P61006|RAB8A_HUMAN Ras-related protein Rab-8A OS=Homo sapiens OX=9606 GN=RAB8A PE=1 SV=1;sp|Q92930|RAB8B_HUMAN Ras-related protein Rab-8B OS=Homo sapiens OX=9606 GN=RAB8B PE=1 SV=2	1	86.8653	0.00592799	93.178	53.12	93.178	0.99869	28.8229	0.0140633	41.876	0.977795	16.4379	0.041771	27.303	0.985832	18.4251	0.0396275	28.013					0.964661	14.3612	0.0332771	30.564	0.999895	39.7878	0.0116967
Q9BQ75	Protein CMSS1	CMSS1	221	1.5373	1.8985	1.4444	1.4191	1.8341	1.4815	1.3039	1.6735	0.94754	0.9585	Q9BQ75	221	Q9BQ75	Q9BQ75	Protein CMSS1	CMSS1	sp|Q9BQ75|CMS1_HUMAN Protein CMSS1 OS=Homo sapiens OX=9606 GN=CMSS1 PE=1 SV=2	1	68.8599	2.09965e-10	110.86	110.86	94.297	1	66.092	5.6491e-10	110.86	0.999999	59.66	1.2595e-07	101.3	0.999991	50.4191	2.67364e-06	92.063	0.999068	30.3032	0.000181313	63.037	0.999999	58.3702	2.09965e-10	106.13	0.999235	31.1597	0.000168928
Q15149	Plectin	PLEC	3849	1.5373	0.79888	1.059	1.0426	1.2888				1.1889	1.2698	Q15149	3849	Q15149	Q15149	Plectin	PLEC	sp|Q15149|PLEC_HUMAN Plectin OS=Homo sapiens OX=9606 GN=PLEC PE=1 SV=3	1	34.6951	0.00199659	89.9	38.708	34.695	1	18.1899	0.00846859	50.194	1	34.6951	0.00939444	37.681	1	61.8154	0.00199659	61.815					1	34.1926	0.0537446	34.193
P30050	60S ribosomal protein L12	RPL12	99	1.5319	2.6695	1.8546	2.1435	2.5161		1.0456				P30050	99	P30050	P30050	60S ribosomal protein L12	RPL12	sp|P30050|RL12_HUMAN 60S ribosomal protein L12 OS=Homo sapiens OX=9606 GN=RPL12 PE=1 SV=1	1	108.184	9.89649e-27	135.09	126.44	108.18	1	41.8601	0.000389112	41.86	1	108.184	4.89375e-14	108.18	1	59.3721	9.89649e-27	135.09					1	88.5507	6.21958e-09	88.551
P08648	Integrin alpha-5;Integrin alpha-5 heavy chain;Integrin alpha-5 light chain	ITGA5	1038	1.5312	1.678	1.4595		1.4304			1.8596	0.52368		P08648	1038	P08648	P08648	Integrin alpha-5;Integrin alpha-5 heavy chain;Integrin alpha-5 light chain	ITGA5	sp|P08648|ITA5_HUMAN Integrin alpha-5 OS=Homo sapiens OX=9606 GN=ITGA5 PE=1 SV=2	0.999978	46.5018	0.000686539	116.87	82.696	116.87	0.985875	18.4385	0.000956316	36.454					0.997059	25.3019	0.00597171	44.238					0.994003	22.1943	0.0175451	42.64	0.934576	11.5488	0.00654934
P35579	Myosin-9;Myosin-10	MYH9;MYH10	682;689	1.5297	0.78998	1.2261	0.74191			0.9898		0.763	0.8427	P35579;P35580	682;689	P35579;P35580	P35579	Myosin-9;Myosin-10	MYH9;MYH10	sp|P35579|MYH9_HUMAN Myosin-9 OS=Homo sapiens OX=9606 GN=MYH9 PE=1 SV=4;sp|P35580|MYH10_HUMAN Myosin-10 OS=Homo sapiens OX=9606 GN=MYH10 PE=1 SV=3	1	73.8334	7.27968e-05	106.58	106.58	73.833	1	63.6823	3.71825e-05	75.911	1	73.8334	4.38545e-05	73.833									1	64.0395	0.000147991	64.04
P11387	DNA topoisomerase 1	TOP1	712	1.5294	1.6264	1.2868	1.6188	1.7581		1.2983	1.4026			P11387	712	P11387	P11387	DNA topoisomerase 1	TOP1	sp|P11387|TOP1_HUMAN DNA topoisomerase 1 OS=Homo sapiens OX=9606 GN=TOP1 PE=1 SV=2	0.999825	37.5778	1.30023e-09	77.391	60.898	39.166	0.999825	37.5778	1.30023e-09	77.391	0.999275	31.3927	1.84373e-08	71.742	0.999652	34.5872	7.3417e-06	56.9					0.999742	35.8783	2.04817e-07	63.578	0.999143	30.6647	5.61167e-06
P27694	Replication protein A 70 kDa DNA-binding subunit;Replication protein A 70 kDa DNA-binding subunit, N-terminally processed	RPA1	88	1.5289	1.7717	1.6254	1.9459	2.0351		0.96925	1.0305			P27694	88	P27694	P27694	Replication protein A 70 kDa DNA-binding subunit;Replication protein A 70 kDa DNA-binding subunit, N-terminally processed	RPA1	sp|P27694|RFA1_HUMAN Replication protein A 70 kDa DNA-binding subunit OS=Homo sapiens OX=9606 GN=RPA1 PE=1 SV=2	1	33.0574	0.00380147	57.532	37.745	33.057	1	48.7409	0.0127469	48.741	1	42.2105	0.00739643	42.21	1	50.7912	0.00380147	50.791					1	57.5318	0.00450073	57.532	1	33.0574	0.017667
P46013	Antigen KI-67	MKI67	1674		1.5875		1.231							P46013	1674	P46013	P46013	Antigen KI-67	MKI67	sp|P46013|KI67_HUMAN Proliferation marker protein Ki-67 OS=Homo sapiens OX=9606 GN=MKI67 PE=1 SV=2	0.530895	0.537394	2.83011e-08	70.99	70.99	70.99					0.5	0	4.93911e-08	62.19
O15304	Apoptosis regulatory protein Siva	SIVA1	17	1.5282	1.9164	1.4403	1.5832	1.289	1.4778	1.1398	1.1303	2.4247	2.5265	O15304	17	O15304	O15304	Apoptosis regulatory protein Siva	SIVA1	sp|O15304|SIVA_HUMAN Apoptosis regulatory protein Siva OS=Homo sapiens OX=9606 GN=SIVA1 PE=1 SV=2	1	30.8894	3.64487e-29	158.05	148.39	30.889	1	158.047	3.64487e-29	158.05	1	83.3966	5.14739e-27	140.31	1	124.103	2.86985e-22	130.47	1	30.8894	3.54709e-08	102.52	1	91.8546	7.59228e-08	100.11	1	98.4392	1.04019e-07
P49327	Fatty acid synthase;[Acyl-carrier-protein] S-acetyltransferase;[Acyl-carrier-protein] S-malonyltransferase;3-oxoacyl-[acyl-carrier-protein] synthase;3-oxoacyl-[acyl-carrier-protein] reductase;3-hydroxyacyl-[acyl-carrier-protein] dehydratase;Enoyl-[acyl-carrier-protein] reductase;Oleoyl-[acyl-carrier-protein] hydrolase	FASN	1871	1.5273		1.3091		2.6302						P49327	1871	P49327	P49327	Fatty acid synthase;[Acyl-carrier-protein] S-acetyltransferase;[Acyl-carrier-protein] S-malonyltransferase;3-oxoacyl-[acyl-carrier-protein] synthase;3-oxoacyl-[acyl-carrier-protein] reductase;3-hydroxyacyl-[acyl-carrier-protein] dehydratase;Enoyl-[acyl-carrier-protein] reductase;Oleoyl-[acyl-carrier-protein] hydrolase	FASN	sp|P49327|FAS_HUMAN Fatty acid synthase OS=Homo sapiens OX=9606 GN=FASN PE=1 SV=3	1	88.1203	3.53852e-09	95.205	88.104	91.867	0.999988	49.0599	9.6601e-07	61.102	0.386011	0.994695	7.7186e-09	72.265	1	88.1203	0.00321535	91.867
Q9BV40	Vesicle-associated membrane protein 8	VAMP8	47	1.5259	1.2954	1.3876	1.2836	1.0395	1.2074	1.5145	1.9282	1.0405	1.0342	Q9BV40	47	Q9BV40	Q9BV40	Vesicle-associated membrane protein 8	VAMP8	sp|Q9BV40|VAMP8_HUMAN Vesicle-associated membrane protein 8 OS=Homo sapiens OX=9606 GN=VAMP8 PE=1 SV=1	1	166.372	2.14998e-37	177.63	177.63	177.63	1	135.005	9.84817e-27	141.59	1	166.372	2.14998e-37	177.63	1	173.391	2.14998e-37	177.63	1	78.9761	1.40487e-05	83.292	1	150.435	6.27457e-29	155.98	1	107.113	1.74838e-10
Q92887	Canalicular multispecific organic anion transporter 1	ABCC2	940	1.5254	1.1906	0.79505	1.1487	1.4763		1.0086	0.87449	0.41344	0.4222	Q92887	940	Q92887	Q92887	Canalicular multispecific organic anion transporter 1	ABCC2	sp|Q92887|MRP2_HUMAN Canalicular multispecific organic anion transporter 1 OS=Homo sapiens OX=9606 GN=ABCC2 PE=1 SV=3	0.999957	43.6785	1.92114e-05	104.79	77.299	86.467	0.998043	27.0765	0.013085	44.193	0.999615	34.1457	0.000257364	68.83	0.999957	43.6785	1.92114e-05	86.467					0.999873	38.9767	7.16266e-05	77.776	0.999667	34.7718	6.33063e-05
Q92616	Translational activator GCN1	GCN1L1	2027	1.525	2.1844									Q92616	2027	Q92616	Q92616	Translational activator GCN1	GCN1L1	sp|Q92616|GCN1_HUMAN eIF-2-alpha kinase activator GCN1 OS=Homo sapiens OX=9606 GN=GCN1 PE=1 SV=6	1	77.978	1.46412e-20	92.242	92.242	92.242
Q96L50	Leucine-rich repeat protein 1	LRR1	127	1.5248	1.6851	1.3685	1.4517	1.2154		1.2534	1.2528			Q96L50	127	Q96L50	Q96L50	Leucine-rich repeat protein 1	LRR1	sp|Q96L50|LLR1_HUMAN Leucine-rich repeat protein 1 OS=Homo sapiens OX=9606 GN=LRR1 PE=1 SV=2	0.999797	36.9199	2.03994e-73	173.8	173.8	162.65	0.998231	27.5148	9.73432e-37	136.56	0.999797	36.9199	1.29848e-67	162.65	0.994215	22.3517	2.03994e-73	173.8	0.95219	12.992	0.000176895	65.901	0.993896	22.1173	9.47729e-56	153.77	0.997554	26.1041	4.09924e-28
P31350	Ribonucleoside-diphosphate reductase subunit M2	RRM2	61;61	1.5236		1.5166	3.1776	1.8857	1.4817	1.6471	1.5232	1.4668	1.2832	P31350;A0A286YFD6	61;61	P31350	P31350	Ribonucleoside-diphosphate reductase subunit M2	RRM2	sp|P31350|RIR2_HUMAN Ribonucleoside-diphosphate reductase subunit M2 OS=Homo sapiens OX=9606 GN=RRM2 PE=1 SV=1;tr|A0A286YFD6|A0A286YFD6_HUMAN Uncharacterized protein OS=Homo sapiens OX=9606 PE=4 SV=1	1	118.191	4.73565e-27	140.93	123.01	118.19	1	91.3058	1.63636e-06	91.306	1	47.9914	0.060779	47.991	1	130.015	6.64263e-18	130.02	1	118.191	1.13816e-12	118.19	1	73.8812	1.60466e-07	101.96	1	55.2612	4.73565e-27
O60506	Heterogeneous nuclear ribonucleoprotein Q	SYNCRIP	412	1.5214	1.3715	1.4287	1.5906	1.4825	1.7206	1.3418	1.3921			O60506	412	O60506	O60506	Heterogeneous nuclear ribonucleoprotein Q	SYNCRIP	sp|O60506|HNRPQ_HUMAN Heterogeneous nuclear ribonucleoprotein Q OS=Homo sapiens OX=9606 GN=SYNCRIP PE=1 SV=2	0.998817	29.2667	9.75392e-39	146.58	146.58	118.53	0.998817	29.2667	6.7341e-22	118.53	0.973159	15.5938	1.39656e-11	92.307	0.998422	28.0109	4.97861e-13	99.569	0.995735	23.6822	2.82718e-13	100.45	0.998718	28.915	9.75392e-39	146.58	0.96683	14.646	6.33347e-11
P15559	NAD(P)H dehydrogenase [quinone] 1	NQO1	210	1.5205		1.2859		0.74559						P15559	210	P15559	P15559	NAD(P)H dehydrogenase [quinone] 1	NQO1	sp|P15559|NQO1_HUMAN NAD(P)H dehydrogenase [quinone] 1 OS=Homo sapiens OX=9606 GN=NQO1 PE=1 SV=1	0.888589	9.01775	6.93393e-08	119.29	74.209	53.327	0.643518	2.56522	6.93393e-08	119.29					0.625411	2.22611	0.00425376	86.794					0.562383	1.08938	0.0111479	54.416
P84077	ADP-ribosylation factor 1;ADP-ribosylation factor 3	ARF1;ARF3	73;73;73	1.5204	1.0964	1.5303	1.2589	1.0328		0.91785	0.8513	0.87328	0.83066	P84077;P61204;F5H423	73;73;73	P84077	P84077	ADP-ribosylation factor 1;ADP-ribosylation factor 3	ARF1;ARF3	sp|P84077|ARF1_HUMAN ADP-ribosylation factor 1 OS=Homo sapiens OX=9606 GN=ARF1 PE=1 SV=2;sp|P61204|ARF3_HUMAN ADP-ribosylation factor 3 OS=Homo sapiens OX=9606 GN=ARF3 PE=1 SV=2;tr|F5H423|F5H423_HUMAN Uncharacterized protein OS=Homo sapiens OX=9606 PE=3 SV	1	29.4435	4.5619e-09	115.5	102.29	29.444	1	45.2567	0.000119639	53.995	1	73.1664	1.58437e-06	73.166	1	94.5445	4.5619e-09	94.544	1	52.254	0.00379011	52.254	1	85.6194	2.0602e-07	85.619	1	65.1724	1.85482e-05
O95793	Double-stranded RNA-binding protein Staufen homolog 1	STAU1	507	1.5203		2.0196		1.4721		1.9546	2.0339			O95793	507	O95793	O95793	Double-stranded RNA-binding protein Staufen homolog 1	STAU1	sp|O95793|STAU1_HUMAN Double-stranded RNA-binding protein Staufen homolog 1 OS=Homo sapiens OX=9606 GN=STAU1 PE=1 SV=2	0.998843	29.3634	8.49071e-13	117.92	104.8	117.92	0.969208	14.9798	0.00193351	64.313					0.956211	13.3919	0.0157094	41.825					0.998843	29.3634	8.49071e-13	117.92	0.998489	28.2005	6.33063e-05
P15924	Desmoplakin	DSP	140	1.5185	1.5796	1.9632	1.646	1.5326		1.3362	1.5948	1.3359	1.3047	P15924	140	P15924	P15924	Desmoplakin	DSP	sp|P15924|DESP_HUMAN Desmoplakin OS=Homo sapiens OX=9606 GN=DSP PE=1 SV=3	1	19.8388	8.38006e-08	105.03	105.03	19.839	1	105.032	8.38006e-08	105.03	1	77.5969	0.000114031	77.597	1	57.8017	0.0011437	57.802	1	40.4755	0.0296179	40.475	1	62.1402	0.000826307	62.14	1	88.1865	0.0002267
O43795	Unconventional myosin-Ib	MYO1B	986	1.5184	1.2825	1.26	1.3186	1.2592	1.4021	1.4754	1.4886	1.2736	1.3332	O43795	986	O43795	O43795	Unconventional myosin-Ib	MYO1B	sp|O43795|MYO1B_HUMAN Unconventional myosin-Ib OS=Homo sapiens OX=9606 GN=MYO1B PE=1 SV=3	1	146.18	3.28816e-62	204.86	180.87	204.86	1	68.2101	9.74612e-08	87.85	1	91.4128	1.08591e-14	115.34	1	146.18	3.28816e-62	204.86	1	125.556	3.64726e-52	197.56	1	98.0511	3.70996e-26	137.84	1	104.222	3.79216e-28
P41223	Protein BUD31 homolog	BUD31	28	1.5183	1.6773			1.7227	2.244		1.0741			P41223	28	P41223	P41223	Protein BUD31 homolog	BUD31	sp|P41223|BUD31_HUMAN Protein BUD31 homolog OS=Homo sapiens OX=9606 GN=BUD31 PE=1 SV=2	1	81.9667	4.45768e-19	103.85	103.85	81.967									1	43.1155	0.000129316	43.116	1	81.9667	4.45768e-19	103.85					1	76.1546	4.2724e-12
O60343	TBC1 domain family member 4	TBC1D4	68		1.579									O60343	68	O60343	O60343	TBC1 domain family member 4	TBC1D4	sp|O60343|TBCD4_HUMAN TBC1 domain family member 4 OS=Homo sapiens OX=9606 GN=TBC1D4 PE=1 SV=2	1	36.7699	0.00400725	36.77	32.14	36.77
Q969T9	WW domain-binding protein 2	WBP2	258		1.5779			1.7436		1.2917			1.0189	Q969T9	258	Q969T9	Q969T9	WW domain-binding protein 2	WBP2	sp|Q969T9|WBP2_HUMAN WW domain-binding protein 2 OS=Homo sapiens OX=9606 GN=WBP2 PE=1 SV=1	0.544091	0.767931	2.58334e-14	61.228	61.228	43.036									0.5	0	2.58334e-14	61.228					0.5	0	2.01506e-08	41.749
Q969T9	WW domain-binding protein 2	WBP2	259		1.5779			1.7436		1.2917			0.89013	Q969T9	259	Q969T9	Q969T9	WW domain-binding protein 2	WBP2	sp|Q969T9|WBP2_HUMAN WW domain-binding protein 2 OS=Homo sapiens OX=9606 GN=WBP2 PE=1 SV=1	0.5	0	2.58334e-14	61.228	61.228	34.681									0.5	0	2.58334e-14	61.228					0.5	0	2.01506e-08	41.749
P60866	40S ribosomal protein S20	RPS20	8	1.518	1.7349	1.4133	1.7256	1.6454	1.9116	0.72439	0.69611	0.77677	0.86549	P60866	8	P60866	P60866	40S ribosomal protein S20	RPS20	sp|P60866|RS20_HUMAN 40S ribosomal protein S20 OS=Homo sapiens OX=9606 GN=RPS20 PE=1 SV=1	1	42.5683	0	332.06	284.07	42.568	1	55.1861	0	332.06	1	22.4169	5.78313e-198	286.09	1	36.1928	1.31241e-276	316.76	1	42.5683	8.55181e-184	281.12	1	127.712	9.60271e-184	280.21	1	26.4899	8.81382e-56
Q9H3U5	Major facilitator superfamily domain-containing protein 1	MFSD1	460	0.59534	1.5766			1.0731						Q9H3U5	460	Q9H3U5	Q9H3U5	Major facilitator superfamily domain-containing protein 1	MFSD1	sp|Q9H3U5|MFSD1_HUMAN Major facilitator superfamily domain-containing protein 1 OS=Homo sapiens OX=9606 GN=MFSD1 PE=2 SV=2	1	22.7205	0.00685334	38.783	25.582	22.72									1	38.7825	0.00685334	38.783
Q9HC07	Transmembrane protein 165	TMEM165	199		1.5764	1.0567			1.106	1.6243	1.5173		1.2241	Q9HC07	199	Q9HC07	Q9HC07	Transmembrane protein 165	TMEM165	sp|Q9HC07|TM165_HUMAN Transmembrane protein 165 OS=Homo sapiens OX=9606 GN=TMEM165 PE=1 SV=1	0.552143	0.909123	1.84831e-22	124.26	124.26	57.708	0.546396	0.808299	1.85293e-11	90.654									0.536257	0.630964	2.73056e-09	78.021	0.537893	0.659528	2.82775e-07	66.779	0.535947	0.625546	5.86454e-09
P35580	Myosin-10	MYH10	232	1.5161				1.1821			0.90797			P35580	232	P35580	P35580	Myosin-10	MYH10	sp|P35580|MYH10_HUMAN Myosin-10 OS=Homo sapiens OX=9606 GN=MYH10 PE=1 SV=3	0.783849	5.59476	4.3389e-09	76.378	76.378	76.378									0.783849	5.59476	4.3389e-09	76.378									0.5	0	0.0230319
O95249	Golgi SNAP receptor complex member 1	GOSR1	204	1.5153	1.7422	1.6566	2.1746	1.2784	1.2486	0.8317	0.99782			O95249	204	O95249	O95249	Golgi SNAP receptor complex member 1	GOSR1	sp|O95249|GOSR1_HUMAN Golgi SNAP receptor complex member 1 OS=Homo sapiens OX=9606 GN=GOSR1 PE=1 SV=1	1	36.8469	0.000832942	64.224	49.967	36.847	1	54.6997	0.00165383	54.7	1	36.3034	0.00900553	36.303	1	43.8967	0.000832942	64.224	1	36.8469	0.00475569	42.095	1	43.6045	0.00426863	43.604	1	31.2279	0.0141745
P11387	DNA topoisomerase 1	TOP1	400	1.514	1.4414	1.3625	1.2957	1.3862		1.8199	1.8821			P11387	400	P11387	P11387	DNA topoisomerase 1	TOP1	sp|P11387|TOP1_HUMAN DNA topoisomerase 1 OS=Homo sapiens OX=9606 GN=TOP1 PE=1 SV=2	0.849523	7.51706	0.000221777	81.017	81.017	81.017	0.827355	6.80539	0.00413639	59.245	0.849523	7.51706	0.000221777	81.017	0.838456	7.1519	0.00186811	62.466					0.838456	7.1519	0.00186811	62.466	0.758009	4.95875	0.0198669
Q9UKM9	RNA-binding protein Raly	RALY	35		1.5756	1.1213	1.2136	1.2072	1.3578	1.2326	2.0145		2.5152	Q9UKM9	35	Q9UKM9	Q9UKM9	RNA-binding protein Raly	RALY	sp|Q9UKM9|RALY_HUMAN RNA-binding protein Raly OS=Homo sapiens OX=9606 GN=RALY PE=1 SV=1	0.570311	1.22958	1.26054e-09	113.61	0	81.92	0.5	0	1.02535e-05	89.301	0.570311	1.22958	3.05636e-05	81.92	0.5	0	1.26054e-09	110.31	0.5	0	2.23872e-05	83.314	0.5	0	2.23872e-05	83.314	0.545025	0.784281	0.00126135
Q9UKM9	RNA-binding protein Raly	RALY	34		1.5756	1.1213		1.2072	1.3578	1.2326			2.5152	Q9UKM9	34	Q9UKM9	Q9UKM9	RNA-binding protein Raly	RALY	sp|Q9UKM9|RALY_HUMAN RNA-binding protein Raly OS=Homo sapiens OX=9606 GN=RALY PE=1 SV=1	0.901994	9.63953	1.26054e-09	113.61	0	96.64	0.5	0	1.02535e-05	89.301					0.5	0	1.26054e-09	110.31	0.5	0	2.23872e-05	83.314	0.5	0	2.23872e-05	83.314
O15498	Synaptobrevin homolog YKT6	YKT6	103	1.5114		1.1746	1.0332				1.3108	0.66192		O15498	103	O15498	O15498	Synaptobrevin homolog YKT6	YKT6	sp|O15498|YKT6_HUMAN Synaptobrevin homolog YKT6 OS=Homo sapiens OX=9606 GN=YKT6 PE=1 SV=1	1	34.3856	0.0078647	59.57	20.304	34.386	1	29.2639	0.0186407	29.264	1	38.7907	0.0078647	38.791													1	34.3856	0.0128474
Q14344	Guanine nucleotide-binding protein subunit alpha-13	GNA13	214	1.5112	1.3971	1.1915	1.606	1.7945	1.6979	1.1137	1.1799		1.101	Q14344	214	Q14344	Q14344	Guanine nucleotide-binding protein subunit alpha-13	GNA13	sp|Q14344|GNA13_HUMAN Guanine nucleotide-binding protein subunit alpha-13 OS=Homo sapiens OX=9606 GN=GNA13 PE=1 SV=2	0.999999	61.5204	1.59303e-44	188.13	188.13	175.21	0.999904	40.1914	1.94868e-28	155.15	0.999992	51.14	6.71805e-29	152	0.999995	53.247	1.59303e-44	188.13	0.999994	52.2614	6.89244e-27	137.68	0.999997	54.5868	1.0003e-28	148.72	0.999774	36.4582	9.21497e-11
P26599	Polypyrimidine tract-binding protein 1	PTBP1	428	1.5107	1.3547	1.4307	1.1844	1.3409	1.273	1.3023	1.2626	0.61514	0.67654	P26599	428	P26599	P26599	Polypyrimidine tract-binding protein 1	PTBP1	sp|P26599|PTBP1_HUMAN Polypyrimidine tract-binding protein 1 OS=Homo sapiens OX=9606 GN=PTBP1 PE=1 SV=1	1	85.8082	4.18623e-22	119.4	119.4	85.808	1	97.3199	5.68228e-13	97.32	1	105.377	1.30712e-16	106.94	1	88.0194	4.01406e-11	88.019	1	85.8082	4.18623e-22	119.4	1	86.4794	4.48842e-11	86.479	1	68.5672	2.2941e-07
Q96J02	E3 ubiquitin-protein ligase Itchy homolog	ITCH	249	1.51	1.4185	1.1194	1.3577	1.5558	0.92042	0.88139		0.91713	0.89501	Q96J02	249	Q96J02	Q96J02	E3 ubiquitin-protein ligase Itchy homolog	ITCH	sp|Q96J02|ITCH_HUMAN E3 ubiquitin-protein ligase Itchy homolog OS=Homo sapiens OX=9606 GN=ITCH PE=1 SV=2	1	22.9022	6.45104e-16	89.049	84.611	22.902	1	40.3813	0.000150273	40.381	1	67.4303	1.56725e-08	67.43	1	80.9749	1.09804e-12	80.975	1	22.9022	0.0134988	22.902	1	31.7535	0.00137356	31.753
Q9HB21	Pleckstrin homology domain-containing family A member 1	PLEKHA1	157	1.5082	1.4801	1.2282	1.4275	1.1605	1.0567	1.0942	0.97847			Q9HB21	157	Q9HB21	Q9HB21	Pleckstrin homology domain-containing family A member 1	PLEKHA1	sp|Q9HB21|PKHA1_HUMAN Pleckstrin homology domain-containing family A member 1 OS=Homo sapiens OX=9606 GN=PLEKHA1 PE=1 SV=2	1	142.939	9.54355e-54	144.4	144.4	142.94	1	102.691	4.38878e-27	102.69	1	89.5651	9.17541e-20	89.565	1	138.708	2.51022e-53	138.71	1	142.939	1.35384e-53	142.94	1	125.114	2.82296e-37	125.11	1	144.4	9.54355e-54
Q9ULT8	E3 ubiquitin-protein ligase HECTD1	HECTD1	229	1.5081	0.96058	1.0694	1.2595	1.0293	1.1743	1.2887	1.2544			Q9ULT8	229	Q9ULT8	Q9ULT8	E3 ubiquitin-protein ligase HECTD1	HECTD1	sp|Q9ULT8|HECD1_HUMAN E3 ubiquitin-protein ligase HECTD1 OS=Homo sapiens OX=9606 GN=HECTD1 PE=1 SV=3	1	61.1023	3.35319e-29	129.15	111.44	61.102	1	60.0318	1.11263e-16	109.03	1	120.92	3.67389e-22	120.92	1	100.209	4.19114e-29	127.17	1	61.1023	1.47669e-06	61.102	1	62.002	4.99714e-17	112.56	1	53.2779	2.59966e-05
Q96A65	Exocyst complex component 4	EXOC4	140	1.5078			0.66533							Q96A65	140	Q96A65	Q96A65	Exocyst complex component 4	EXOC4	sp|Q96A65|EXOC4_HUMAN Exocyst complex component 4 OS=Homo sapiens OX=9606 GN=EXOC4 PE=1 SV=1	0.998322	27.7454	0.000848001	57.804	38.481	57.804					0.986661	18.6905	0.0130168	30.483
Q9BQ61	Uncharacterized protein C19orf43	C19orf43	128	1.5075	1.4819	1.2293	1.0618	1.6605	1.3581	1.0227	0.87905	1.3721	1.475	Q9BQ61	128	Q9BQ61	Q9BQ61	Uncharacterized protein C19orf43	C19orf43	sp|Q9BQ61|TRIR_HUMAN Telomerase RNA component interacting RNase OS=Homo sapiens OX=9606 GN=TRIR PE=1 SV=1	0.999998	57.7193	0.00226005	78.556	23.493	78.556	0.999889	39.5338	0.00358591	52.49	0.998863	29.439	0.00731755	42.395	0.998616	28.5839	0.00768324	41.54	0.973482	15.6479	0.068464	18.268	0.999944	42.5193	0.00226005	62.823	0.989118	19.5852	0.0394168
P35251	Replication factor C subunit 1	RFC1	468	1.507	1.7626	1.5989	1.8343	1.6358	1.1944	1.4004	1.6038			P35251	468	P35251	P35251	Replication factor C subunit 1	RFC1	sp|P35251|RFC1_HUMAN Replication factor C subunit 1 OS=Homo sapiens OX=9606 GN=RFC1 PE=1 SV=4	1	69.6047	6.63125e-49	153.74	153.74	69.605	1	153.741	6.63125e-49	153.74	1	117.298	6.16697e-22	117.3	1	83.7581	9.45796e-49	151.62	1	69.6047	2.22366e-22	123.03	1	123.968	1.57636e-22	123.97	1	46.6209	5.15958e-07
P62841	40S ribosomal protein S15	RPS15	65	1.5069	1.6595			1.475		0.80203				P62841	65	P62841	P62841	40S ribosomal protein S15	RPS15	sp|P62841|RS15_HUMAN 40S ribosomal protein S15 OS=Homo sapiens OX=9606 GN=RPS15 PE=1 SV=2	1	84.0202	2.78471e-09	107.98	85.744	107.98					0.999998	57.8931	0.00115963	82.59	1	84.0202	2.78471e-09	107.98					0.999999	60.4537	3.06556e-05	84.41
Q14149	MORC family CW-type zinc finger protein 3	MORC3	855	1.5066	1.2227	1.1052	1.1468	1.5201	1.2762	1.3098	1.1026	1.0022	1.0447	Q14149	855	Q14149	Q14149	MORC family CW-type zinc finger protein 3	MORC3	sp|Q14149|MORC3_HUMAN MORC family CW-type zinc finger protein 3 OS=Homo sapiens OX=9606 GN=MORC3 PE=1 SV=3	1	99.4167	2.209e-88	223.72	217.3	223.72	1	99.4167	2.209e-88	223.72	1	63.3464	1.22119e-15	121.42	1	83.1401	3.99939e-27	145.43	0.999996	54.3116	2.79575e-06	91.969	1	69.581	1.13936e-21	134.98	1	63.4822	5.58741e-11
P62906	60S ribosomal protein L10a	RPL10A	118	1.5036	1.6698	1.5157	1.5262	0.91004	1.4234	0.7876	0.78765			P62906	118	P62906	P62906	60S ribosomal protein L10a	RPL10A	sp|P62906|RL10A_HUMAN 60S ribosomal protein L10a OS=Homo sapiens OX=9606 GN=RPL10A PE=1 SV=2	1	63.8937	3.9077e-55	189.52	173.63	63.894	1	134.164	1.45795e-38	151.04	1	163.756	2.50312e-54	180.64	1	100.554	3.9077e-55	189.52	1	63.8937	6.64382e-05	63.894	1	149.475	1.52529e-42	166.35	1	98.9771	7.30394e-13
O76021	Ribosomal L1 domain-containing protein 1	RSL1D1	332		1.571			1.0966			1.4277			O76021	332	O76021	O76021	Ribosomal L1 domain-containing protein 1	RSL1D1	sp|O76021|RL1D1_HUMAN Ribosomal L1 domain-containing protein 1 OS=Homo sapiens OX=9606 GN=RSL1D1 PE=1 SV=3	0.556412	1.1315	9.21807e-11	101.15	89.457	58.09	0.4924	1.13442	2.35602e-06	63.337					0.518602	1.3278	3.70755e-08	80.638					0.490668	0	2.34597e-07	71.697	0.556412	1.1315	2.2769e-05
P16403	Histone H1.4;Histone H1.3;Histone H1.2	HIST1H1E;HIST1H1D;HIST1H1C	34;35;34	1.5026	1.5292	1.7748	1.7142	1.6111	1.7431	0.92203	0.8948	1.7125	1.67	P10412;P16402;P16403	34;35;34	P10412;P16403	P16403	Histone H1.4;Histone H1.3;Histone H1.2	HIST1H1E;HIST1H1D;HIST1H1C	sp|P10412|H14_HUMAN Histone H1.4 OS=Homo sapiens OX=9606 GN=HIST1H1E PE=1 SV=2;sp|P16402|H13_HUMAN Histone H1.3 OS=Homo sapiens OX=9606 GN=HIST1H1D PE=1 SV=2;sp|P16403|H12_HUMAN Histone H1.2 OS=Homo sapiens OX=9606 GN=HIST1H1C PE=1 SV=2	1	226.506	2.13943e-94	242.48	242.48	242.48	1	222.349	1.67229e-78	225.23	1	220.434	1.67229e-78	225.23	1	123.097	1.10209e-15	123.1	1	226.506	2.13943e-94	242.48	1	157.705	4.67682e-23	160.18	1	176.747	1.62511e-35
Q13283	Ras GTPase-activating protein-binding protein 1	G3BP1	376	1.5009	1.4213	1.5582	1.6819	1.3019	1.2541	0.80059	0.75411			Q13283	376	Q13283	Q13283	Ras GTPase-activating protein-binding protein 1	G3BP1	sp|Q13283|G3BP1_HUMAN Ras GTPase-activating protein-binding protein 1 OS=Homo sapiens OX=9606 GN=G3BP1 PE=1 SV=1	1	170.45	1.1116e-80	182.19	182.19	182.19	1	102.489	9.95826e-24	114.92	1	143.825	1.58524e-45	146.76	1	170.45	1.1116e-80	182.19	1	109.846	4.18553e-29	125.35	1	134.648	9.01292e-45	141.45	1	94.9508	4.27951e-19
O43399	Tumor protein D54	TPD52L2	165	1.5009	1.318	1.6706	1.3858	1.517		0.99216	1.0188			O43399	165	O43399	O43399	Tumor protein D54	TPD52L2	sp|O43399|TPD54_HUMAN Tumor protein D54 OS=Homo sapiens OX=9606 GN=TPD52L2 PE=1 SV=2	1	46.8795	4.08285e-07	114.83	109.87	46.88	1	114.834	4.08285e-07	114.83	1	73.4351	0.000522906	73.435	1	57.8017	0.00233753	57.802					1	91.8546	0.00164734	91.855	1	46.8795	0.00428528
O76094	Signal recognition particle subunit SRP72	SRP72	600	1.5006		1.6171		1.2402		0.95408				O76094	600	O76094	O76094	Signal recognition particle subunit SRP72	SRP72	sp|O76094|SRP72_HUMAN Signal recognition particle subunit SRP72 OS=Homo sapiens OX=9606 GN=SRP72 PE=1 SV=3	1	65.5558	9.04451e-16	84.327	73.606	84.327	0.999999	59.8214	2.50454e-08	66.853					0.999998	56.32	2.7647e-08	66.3	0.999552	33.489	0.00479693	44.632	1	65.5558	9.04451e-16	84.327	0.999995	52.844	0.000320885
Q14149	MORC family CW-type zinc finger protein 3	MORC3	464	1.4224	1.5677	1.4052	1.1429	0.95137		0.84737				Q14149	464	Q14149	Q14149	MORC family CW-type zinc finger protein 3	MORC3	sp|Q14149|MORC3_HUMAN MORC family CW-type zinc finger protein 3 OS=Homo sapiens OX=9606 GN=MORC3 PE=1 SV=3	0.5	0	5.56289e-19	100.19	97.684	100.19	0.5	0	1.10226e-08	69.947	0.5	0	5.56289e-19	100.19	0.5	0	0.000164624	43.497					0.5	0	0.000713728	34.914
Q9H305	Cell death-inducing p53-target protein 1	CDIP1	21	1.5003	1.421	1.4746	1.366	1.3792	1.3203	1.37	1.2502	1.6618	1.5459	Q9H305	21	Q9H305	Q9H305	Cell death-inducing p53-target protein 1	CDIP1	sp|Q9H305|CDIP1_HUMAN Cell death-inducing p53-target protein 1 OS=Homo sapiens OX=9606 GN=CDIP1 PE=1 SV=1	1	90.3974	1.16759e-52	134.2	134.2	90.397	1	110.612	5.37336e-38	110.61	1	100.949	1.75616e-28	100.95	1	98.3262	3.00898e-28	98.326	1	90.3974	1.63788e-20	90.397	1	134.204	1.16759e-52	134.2	1	94.1915	4.98403e-28
Q9P1Y6	PHD and RING finger domain-containing protein 1	PHRF1	164	1.5001	1.1881	0.98954		1.0303						Q9P1Y6	164	Q9P1Y6	Q9P1Y6	PHD and RING finger domain-containing protein 1	PHRF1	sp|Q9P1Y6|PHRF1_HUMAN PHD and RING finger domain-containing protein 1 OS=Homo sapiens OX=9606 GN=PHRF1 PE=1 SV=3	1	37.5584	0.0136164	65.038	65.038	37.558	1	50.1265	0.0308557	50.127					1	63.4796	0.0147026	63.48
Q13263	Transcription intermediary factor 1-beta	TRIM28	238	1.4996	0.73363	0.90949	0.81771	0.80825	0.87481	0.70359	0.67364	0.69113	0.6198	Q13263	238	Q13263	Q13263	Transcription intermediary factor 1-beta	TRIM28	sp|Q13263|TIF1B_HUMAN Transcription intermediary factor 1-beta OS=Homo sapiens OX=9606 GN=TRIM28 PE=1 SV=5	1	101.285	1.02933e-166	258.91	258.91	101.29	1	118.455	8.34608e-100	221.82	1	74.9528	1.38416e-86	202.53	1	165.298	8.34608e-100	221.82	1	101.285	1.37942e-29	129.02	1	214.271	1.02933e-166	258.91	1	192.811	7.78981e-87
P62906	60S ribosomal protein L10a	RPL10A	133	1.499	1.058	1.3692	1.2493	1.4284	1.3644	0.7179	0.98354	0.44593	0.45026	P62906	133	P62906	P62906	60S ribosomal protein L10a	RPL10A	sp|P62906|RL10A_HUMAN 60S ribosomal protein L10a OS=Homo sapiens OX=9606 GN=RPL10A PE=1 SV=2	1	100.472	7.01368e-13	107.07	107.07	107.07	0.999992	50.8201	7.06119e-05	72.485	0.653108	2.74791	0.00270692	74.127	1	100.472	7.01368e-13	107.07	0.59123	1.60277	0.00940639	63.565	1	93.8891	7.90933e-10	98.694	0.5844	1.48034	0.0094687
P67936	Tropomyosin alpha-4 chain	TPM4	228	1.4983	1.147	1.04	1.0247	0.92688	1.2322	1.3033	1.4052			P67936	228	P67936	P67936	Tropomyosin alpha-4 chain	TPM4	sp|P67936|TPM4_HUMAN Tropomyosin alpha-4 chain OS=Homo sapiens OX=9606 GN=TPM4 PE=1 SV=3	1	82.4772	7.49321e-64	157.15	157.15	82.477	1	27.035	0.00298673	27.035	1	69.3982	1.10576e-08	69.398	1	157.151	7.49321e-64	157.15	1	82.4772	1.03022e-13	82.477	1	20.7572	0.0104373	20.757	1	98.7404	2.6132e-25
Q7Z569	BRCA1-associated protein	BRAP	580	1.498	1.095	1.0294	1.4478	1.2373		0.84884				Q7Z569	580	Q7Z569	Q7Z569	BRCA1-associated protein	BRAP	sp|Q7Z569|BRAP_HUMAN BRCA1-associated protein OS=Homo sapiens OX=9606 GN=BRAP PE=1 SV=2	1	104.834	8.20001e-87	167.22	167.22	104.83	1	84.0352	3.34877e-20	84.035	1	104.834	8.40667e-38	104.83	1	167.221	8.20001e-87	167.22					1	66.4795	9.97817e-10	66.479
P09429	High mobility group protein B1;High mobility group protein B2	HMGB1;HMGB2	157;157	1.4973		1.9039	1.5213	1.2532		1.1051	0.93537	0.77415	0.81146	P09429;P26583	157;157	P09429;P26583	P09429	High mobility group protein B1;High mobility group protein B2	HMGB1;HMGB2	sp|P09429|HMGB1_HUMAN High mobility group protein B1 OS=Homo sapiens OX=9606 GN=HMGB1 PE=1 SV=3;sp|P26583|HMGB2_HUMAN High mobility group protein B2 OS=Homo sapiens OX=9606 GN=HMGB2 PE=1 SV=2	1	79.9064	0.000131719	124.23	71.064	79.906	1	60.5185	0.00315162	60.518	1	124.23	0.000131719	124.23	1	61.5599	0.00293573	61.56					1	79.9064	0.00272444	79.906	1	79.9064	0.02793
Q13443	Disintegrin and metalloproteinase domain-containing protein 9	ADAM9	781	1.497	1.366	1.367	1.2644	1.5252		1.4046	1.8249	0.55992	0.77138	Q13443	781	Q13443	Q13443	Disintegrin and metalloproteinase domain-containing protein 9	ADAM9	sp|Q13443|ADAM9_HUMAN Disintegrin and metalloproteinase domain-containing protein 9 OS=Homo sapiens OX=9606 GN=ADAM9 PE=1 SV=1	1	105.001	1.95603e-18	136.49	91.02	136.49	0.999992	51.0767	2.088e-12	77.287	0.999899	39.9647	1.95603e-18	87.772	0.999968	44.964	5.51281e-09	71.174					0.999643	34.4759	5.51281e-09	71.052	0.992273	21.0862	0.000502778
P51665	26S proteasome non-ATPase regulatory subunit 7	PSMD7	180	1.4969	1.12	1.565	1.4111	1.1432	1.1504	1.3458	1.5396	0.89697	0.90992	P51665	180	P51665	P51665	26S proteasome non-ATPase regulatory subunit 7	PSMD7	sp|P51665|PSMD7_HUMAN 26S proteasome non-ATPase regulatory subunit 7 OS=Homo sapiens OX=9606 GN=PSMD7 PE=1 SV=2	1	113.609	3.60359e-38	194.86	194.86	113.61	1	158.041	5.99634e-21	158.04	1	189.242	3.91982e-35	189.24	1	118.08	8.32339e-13	118.08	1	113.609	8.31111e-10	113.61	1	93.2576	1.00538e-05	93.258	1	167.325	2.44041e-24
P50453	Serpin B9	SERPINB9	96	1.4967	1.1973	1.2797	1.1989	1.7081		1.8233	1.6055	1.3489	1.3662	P50453	96	P50453	P50453	Serpin B9	SERPINB9	sp|P50453|SPB9_HUMAN Serpin B9 OS=Homo sapiens OX=9606 GN=SERPINB9 PE=1 SV=1	1	88.9438	9.30077e-22	134.13	107.46	121.24	1	83.7767	9.30077e-22	134.13	1	80.8958	6.13066e-11	112.72	1	82.1487	1.54741e-10	108.58	0.999295	31.5173	0.00319837	58.487	1	88.9438	1.26636e-15	121.24	0.999784	36.6606	0.00019084
P18077	60S ribosomal protein L35a	RPL35A	45	1.4966	1.1156	0.75786	0.91237	0.90034	1.0462	0.98341	1.1933		0.79319	P18077	45	P18077	P18077	60S ribosomal protein L35a	RPL35A	sp|P18077|RL35A_HUMAN 60S ribosomal protein L35a OS=Homo sapiens OX=9606 GN=RPL35A PE=1 SV=2	1	53.7511	1.75658e-06	123.92	83.872	53.751	1	79.4891	0.000499791	79.489	1	58.2299	0.00182941	63.283	1	123.917	1.75658e-06	123.92	1	53.7511	0.00285253	53.751	1	90.7088	0.0028773	90.709	1	59.4259	0.00830274
P46013	Antigen KI-67	MKI67	1367		1.5639		0.6879	1.0409						P46013	1367	P46013	P46013	Antigen KI-67	MKI67	sp|P46013|KI67_HUMAN Proliferation marker protein Ki-67 OS=Homo sapiens OX=9606 GN=MKI67 PE=1 SV=2	0.734524	4.4198	3.26844e-05	49.973	41.154	34.26					0.734524	4.4198	0.00129375	34.26	0.5	0	0.0353128	17.43
P53621	Coatomer subunit alpha;Xenin;Proxenin	COPA	238	1.4962	1.1546	1.0003	1.1081	1.2194	1.1583	1.8776	1.6152	1.66	1.6785	P53621	238	P53621	P53621	Coatomer subunit alpha;Xenin;Proxenin	COPA	sp|P53621|COPA_HUMAN Coatomer subunit alpha OS=Homo sapiens OX=9606 GN=COPA PE=1 SV=2	1	28.5455	0.000104651	106.01	80.534	28.546	1	75.4622	0.000104651	75.462	1	37.6544	0.000657733	60.209	1	64.6747	0.000422533	64.842	1	59.7088	0.000697327	59.709	1	32.1521	0.00379212	41.967	1	28.5455	0.00440567
Q8ND82	Zinc finger protein 280C	ZNF280C	574	1.4958	1.2686	1.7432	1.5853	1.3409	1.6636	0.6513	0.60551			Q8ND82	574	Q8ND82	Q8ND82	Zinc finger protein 280C	ZNF280C	sp|Q8ND82|Z280C_HUMAN Zinc finger protein 280C OS=Homo sapiens OX=9606 GN=ZNF280C PE=1 SV=1	0.999713	35.4146	4.42238e-18	116.86	116.86	116.86	0.999713	35.4146	4.42238e-18	116.86	0.833961	7.00937	0.000526909	42.78	0.9741	15.7531	7.0725e-07	76.85	0.856234	7.74936	0.00205108	40.025	0.97483	15.8804	9.17496e-05	51.591	0.842937	7.2972	0.00177358
P05067	Amyloid beta A4 protein;N-APP;Soluble APP-alpha;Soluble APP-beta;C99;Beta-amyloid protein 42;Beta-amyloid protein 40;C83;P3(42);P3(40);C80;Gamma-secretase C-terminal fragment 59;Gamma-secretase C-terminal fragment 57;Gamma-secretase C-terminal fragment 50;C31	APP	726		1.56		1.2931	0.85524	2.1934					P05067	726	P05067	P05067	Amyloid beta A4 protein;N-APP;Soluble APP-alpha;Soluble APP-beta;C99;Beta-amyloid protein 42;Beta-amyloid protein 40;C83;P3(42);P3(40);C80;Gamma-secretase C-terminal fragment 59;Gamma-secretase C-terminal fragment 57;Gamma-secretase C-terminal fragment 50;C31	APP	sp|P05067|A4_HUMAN Amyloid-beta A4 protein OS=Homo sapiens OX=9606 GN=APP PE=1 SV=3	1	34.4051	0.000371731	37.896	37.896	34.405					1	37.8964	0.000371731	37.896	1	12.9288	0.0625775	12.929	1	34.4051	0.00420186	34.405
Q15149	Plectin	PLEC	4152	1.4952	1.416		1.1941			1.2108	1.5929	1.0977	1.0965	Q15149	4152	Q15149	Q15149	Plectin	PLEC	sp|Q15149|PLEC_HUMAN Plectin OS=Homo sapiens OX=9606 GN=PLEC PE=1 SV=3	0.999835	37.8259	0.000241065	129.88	102.76	129.88					0.989124	19.5878	0.0106774	47.915	0.955691	13.3383	0.0568184	34.179					0.955691	13.3383	0.0111695	34.179	0.989124	19.5878	0.00287744
O95394	Phosphoacetylglucosamine mutase	PGM3	196	1.4941		1.6486				1.8333				O95394	196	O95394	O95394	Phosphoacetylglucosamine mutase	PGM3	sp|O95394|AGM1_HUMAN Phosphoacetylglucosamine mutase OS=Homo sapiens OX=9606 GN=PGM3 PE=1 SV=1	1	26.9556	1.43938e-06	84.874	74.215	26.956	1	84.8736	1.43938e-06	84.874													1	26.9556	0.0537608	26.956
P35659	Protein DEK	DEK	177	1.4924	1.0923	1.4082	1.14	1.6511		0.79106				P35659	177	P35659	P35659	Protein DEK	DEK	sp|P35659|DEK_HUMAN Protein DEK OS=Homo sapiens OX=9606 GN=DEK PE=1 SV=1	1	39.1478	0.00941747	49.35	21.338	39.148	1	32.3293	0.0272979	45.368	1	39.1478	0.0225587	39.148	1	31.4782	0.0282721	44.863					1	41.8761	0.034041	41.876	1	39.1478	0.0377567
P52948	Nuclear pore complex protein Nup98-Nup96;Nuclear pore complex protein Nup98;Nuclear pore complex protein Nup96	NUP98	193	1.492	0.85682	0.8288								P52948	193	P52948	P52948	Nuclear pore complex protein Nup98-Nup96;Nuclear pore complex protein Nup98;Nuclear pore complex protein Nup96	NUP98	sp|P52948|NUP98_HUMAN Nuclear pore complex protein Nup98-Nup96 OS=Homo sapiens OX=9606 GN=NUP98 PE=1 SV=4	0.997033	25.2643	0.0144382	52.527	47.544	52.527	0.997033	25.2643	0.0188859	52.527
P49840	Glycogen synthase kinase-3 alpha;Glycogen synthase kinase-3 beta	GSK3A;GSK3B	360;297	1.492		1.5309	1.571	0.91213		1.2078	1.2885	1.8023	2.1409	P49840;P49841	360;297	P49840;P49841	P49840	Glycogen synthase kinase-3 alpha;Glycogen synthase kinase-3 beta	GSK3A;GSK3B	sp|P49840|GSK3A_HUMAN Glycogen synthase kinase-3 alpha OS=Homo sapiens OX=9606 GN=GSK3A PE=1 SV=2;sp|P49841|GSK3B_HUMAN Glycogen synthase kinase-3 beta OS=Homo sapiens OX=9606 GN=GSK3B PE=1 SV=2	0.996402	24.4242	0.00281738	79.23	33.973	34.75	0.906011	9.84058	0.00654316	40.475	0.962494	14.093	0.00281738	52.495	0.996402	24.4242	0.0416273	34.75					0.907906	9.93809	0.0371762	24.5	0.767505	5.18667	0.0382109
Q9Y2S6	Translation machinery-associated protein 7	TMA7;hCG_2014768	59;59	1.4917	1.6659	1.4745	1.567	1.3806		0.90284	0.99581			Q9Y2S6;A0A024R1R8	59;59	Q9Y2S6	Q9Y2S6	Translation machinery-associated protein 7	TMA7;hCG_2014768	sp|Q9Y2S6|TMA7_HUMAN Translation machinery-associated protein 7 OS=Homo sapiens OX=9606 GN=TMA7 PE=1 SV=1;tr|A0A024R1R8|A0A024R1R8_HUMAN HCG2014768, isoform CRA_a OS=Homo sapiens OX=9606 GN=hCG_2014768 PE=4 SV=1	0.992813	21.4035	3.43417e-11	160.88	73.557	152.47	0.928232	11.1172	2.84615e-07	141.39	0.98888	19.4905	3.43417e-11	160.88	0.992813	21.4035	1.47507e-08	152.47					0.98243	17.4754	2.92303e-07	141.2	0.886572	8.92995	2.09487e-05
Q9Y6E2	Basic leucine zipper and W2 domain-containing protein 2	BZW2	323	1.5657	1.5576		1.3756	1.1319						Q9Y6E2	323	Q9Y6E2	Q9Y6E2	Basic leucine zipper and W2 domain-containing protein 2	BZW2	sp|Q9Y6E2|BZW2_HUMAN Basic leucine zipper and W2 domain-containing protein 2 OS=Homo sapiens OX=9606 GN=BZW2 PE=1 SV=1	0.675229	3.17873	0.000117848	72.29	0	71.176					0.539901	0.694628	0.0154096	42.095	0.624066	2.20119	0.000117848	72.29
P78417	Glutathione S-transferase omega-1	GSTO1	160	1.4904	1.8087	1.4202	1.5266	1.7918		0.56097	0.51475			P78417	160	P78417	P78417	Glutathione S-transferase omega-1	GSTO1	sp|P78417|GSTO1_HUMAN Glutathione S-transferase omega-1 OS=Homo sapiens OX=9606 GN=GSTO1 PE=1 SV=2	0.99223	21.0617	0.000143212	138.1	49.155	138.1	0.840408	7.21478	0.000816889	80.787	0.99223	21.0617	0.000270183	138.1	0.87445	8.42916	0.000198477	130.28					0.541438	0.721512	0.00108899	76.1	0.592579	1.62704	0.0237399
P62316	Small nuclear ribonucleoprotein Sm D2	SNRPD2	8	1.4902	0.82999	0.74858	0.78912	0.95898	0.47323	1.0431	0.84703	1.1749	0.81874	P62316	8	P62316	P62316	Small nuclear ribonucleoprotein Sm D2	SNRPD2	sp|P62316|SMD2_HUMAN Small nuclear ribonucleoprotein Sm D2 OS=Homo sapiens OX=9606 GN=SNRPD2 PE=1 SV=1	0.995334	23.2903	6.42189e-13	105.39	86.794	102.64	0.920788	10.6547	1.4384e-07	82.248	0.987231	18.9307	8.88165e-10	100.82	0.981532	17.2564	6.42189e-13	105.39	0.786186	6.36006	0.00368535	47.204	0.907028	9.89286	6.16659e-11	104.28	0.853329	7.64824	3.10149e-08
Q8N3C0	Activating signal cointegrator 1 complex subunit 3	ASCC3	1420	1.4898			2.09							Q8N3C0	1420	Q8N3C0	Q8N3C0	Activating signal cointegrator 1 complex subunit 3	ASCC3	sp|Q8N3C0|ASCC3_HUMAN Activating signal cointegrator 1 complex subunit 3 OS=Homo sapiens OX=9606 GN=ASCC3 PE=1 SV=3	0.999992	51.107	0.000190854	62.377	51.107	62.377					0.999992	51.107	0.000190854	62.377
P62424	60S ribosomal protein L7a	RPL7A	21	1.4869	1.4711	1.411	1.5463	1.5132	1.5071	0.97025	0.75387	0.94566	1.1213	P62424	21	P62424	P62424	60S ribosomal protein L7a	RPL7A	sp|P62424|RL7A_HUMAN 60S ribosomal protein L7a OS=Homo sapiens OX=9606 GN=RPL7A PE=1 SV=2	0.895735	9.34041	3.28452e-05	113.7	94.06	58.782	0.5	0	0.00132375	89.55	0.647804	2.6466	0.000385337	101.64	0.647804	2.6466	0.000385337	101.64	0.606574	1.88021	3.28452e-05	113.7	0.649998	2.68842	3.28452e-05	113.7	0.631984	2.34839	0.00135876
Q99536	Synaptic vesicle membrane protein VAT-1 homolog	VAT1	250	1.4868	1.5515	1.3784	1.1252	1.4166	1.192		1.0958	0.9318	0.79692	Q99536	250	Q99536	Q99536	Synaptic vesicle membrane protein VAT-1 homolog	VAT1	sp|Q99536|VAT1_HUMAN Synaptic vesicle membrane protein VAT-1 homolog OS=Homo sapiens OX=9606 GN=VAT1 PE=1 SV=2	0.989377	19.6912	5.38645e-162	255.37	255.37	255.37	0.989377	19.6912	5.38645e-162	255.37	0.877432	8.54837	4.41658e-28	123.43	0.891517	9.14769	5.38645e-162	255.37	0.984975	18.166	4.66406e-44	138.04					0.5	0	4.32774e-06
Q9NUQ6	SPATS2-like protein	SPATS2L	142	1.4868	1.3683	1.5615	1.7751	1.0765		0.91636	0.92834			Q9NUQ6	142	Q9NUQ6	Q9NUQ6	SPATS2-like protein	SPATS2L	sp|Q9NUQ6|SPS2L_HUMAN SPATS2-like protein OS=Homo sapiens OX=9606 GN=SPATS2L PE=1 SV=2	1	27.6636	0.000166244	75.788	60.912	27.664	1	61.235	0.00106333	61.235	1	69.8636	0.000401581	69.864	1	75.7881	0.000166244	75.788					1	39.4245	0.00582696	39.424	1	27.6636	0.0672995
Q9Y597	BTB/POZ domain-containing protein KCTD3	KCTD3	503	1.4868	1.0829	1.144	1.0988	1.2721	1.3048	2.0945	2.749	2.5402		Q9Y597	503	Q9Y597	Q9Y597	BTB/POZ domain-containing protein KCTD3	KCTD3	sp|Q9Y597|KCTD3_HUMAN BTB/POZ domain-containing protein KCTD3 OS=Homo sapiens OX=9606 GN=KCTD3 PE=1 SV=2	0.999997	54.9319	9.46191e-25	129.32	129.32	117.07	0.999997	54.9319	5.33228e-17	117.07	0.999976	46.2133	9.46191e-25	129.32	0.99994	42.222	1.13569e-17	124.3	0.999963	44.3602	6.7787e-13	111.33	0.999947	42.7775	1.18341e-12	108.25	0.998887	29.531	1.60732e-09
Q07065	Cytoskeleton-associated protein 4	CKAP4	78	1.4853		1.4679	1.4134							Q07065	78	Q07065	Q07065	Cytoskeleton-associated protein 4	CKAP4	sp|Q07065|CKAP4_HUMAN Cytoskeleton-associated protein 4 OS=Homo sapiens OX=9606 GN=CKAP4 PE=1 SV=2	1	66.8794	8.67792e-12	66.879	64.372	66.879	1	52.5766	1.20676e-08	52.577	1	66.8794	8.67792e-12	66.879
Q8IVP5	FUN14 domain-containing protein 1	FUNDC1	119	1.4852	1.5732	1.2218		1.6108	1.4719	1.2682	0.91661	1.9439	2.1113	Q8IVP5	119	Q8IVP5	Q8IVP5	FUN14 domain-containing protein 1	FUNDC1	sp|Q8IVP5|FUND1_HUMAN FUN14 domain-containing protein 1 OS=Homo sapiens OX=9606 GN=FUNDC1 PE=1 SV=1	1	102.717	1.93474e-22	119.31	119.31	110.41	0.999963	44.2958	0.00279733	44.587					1	101.718	1.93474e-22	119.31	1	70.9558	1.12716e-09	78.794	0.999724	35.5881	0.00088934	36.856	0.999992	51.1585	4.60692e-06
Q8IZ07	Ankyrin repeat domain-containing protein 13A	ANKRD13A	279	1.4846	1.4259	1.2849	1.3767	1.1127	1.2067	0.80361	1.0333	0.87894	0.90813	Q8IZ07	279	Q8IZ07	Q8IZ07	Ankyrin repeat domain-containing protein 13A	ANKRD13A	sp|Q8IZ07|AN13A_HUMAN Ankyrin repeat domain-containing protein 13A OS=Homo sapiens OX=9606 GN=ANKRD13A PE=1 SV=3	1	27.3355	3.82239e-07	106.29	94.781	27.335	1	35.1001	0.00718892	35.1	1	86.4978	9.8911e-06	86.498	1	94.532	3.82239e-07	94.532	1	27.3355	0.0183133	27.335	1	73.7221	4.42118e-05	73.722	1	36.3919	0.00611388
Q96GX2	Putative ataxin-7-like protein 3B	ATXN7L3B	67	1.4845	0.71308	0.9751	0.87988	0.89693	1.0449	1.011	0.89541		1.175	Q96GX2	67	Q96GX2	Q96GX2	Putative ataxin-7-like protein 3B	ATXN7L3B	sp|Q96GX2|A7L3B_HUMAN Ataxin-7-like protein 3B OS=Homo sapiens OX=9606 GN=ATXN7L3B PE=1 SV=2	1	77.5268	3.81501e-07	94.551	89.837	77.527	1	77.0782	3.34322e-05	77.078	1	94.0899	3.98972e-07	94.09	1	94.5515	3.81501e-07	94.551	1	77.5268	3.19915e-05	77.527	1	82.9077	1.47084e-05	82.908	1	60.4007	0.000267437
P13693	Translationally-controlled tumor protein;TPT1-like protein	TPT1	112;117	1.483	1.225	1.2897	1.3504	1.335		1.0442		0.90738	0.90889	P13693;Q56UQ5	112;117	P13693	P13693	Translationally-controlled tumor protein;TPT1-like protein	TPT1	sp|P13693|TCTP_HUMAN Translationally-controlled tumor protein OS=Homo sapiens OX=9606 GN=TPT1 PE=1 SV=1;sp|Q56UQ5|TPT1L_HUMAN TPT1-like protein OS=Homo sapiens OX=9606 PE=2 SV=2	1	82.3045	0.00112708	85.924	85.924	85.924	0.999996	53.7607	0.00115306	53.947	0.999996	53.6904	0.00112708	54.276	0.999987	48.704	0.0019303	48.704					0.999925	41.2269	0.00399653	41.227
O15156	Zinc finger and BTB domain-containing protein 7B	ZBTB7B	450	1.4822	0.95566	1.0227	0.96646			0.86198	1.0714			O15156	450	O15156	O15156	Zinc finger and BTB domain-containing protein 7B	ZBTB7B	sp|O15156|ZBT7B_HUMAN Zinc finger and BTB domain-containing protein 7B OS=Homo sapiens OX=9606 GN=ZBTB7B PE=1 SV=2	1	30.7287	0.00111229	68.132	46.881	30.729	1	68.1321	0.00111229	68.132	1	28.3269	0.0214346	28.327									1	53.5687	0.00272033	53.569	1	30.7287	0.0555471
Q13443	Disintegrin and metalloproteinase domain-containing protein 9	ADAM9	741	1.4818	1.507	1.3884	1.4494	1.5814	1.3732	1.9853	1.3858	0.72379	0.81022	Q13443	741	Q13443	Q13443	Disintegrin and metalloproteinase domain-containing protein 9	ADAM9	sp|Q13443|ADAM9_HUMAN Disintegrin and metalloproteinase domain-containing protein 9 OS=Homo sapiens OX=9606 GN=ADAM9 PE=1 SV=1	1	89.6682	5.01136e-263	308.58	290.77	89.668	1	179.025	2.82053e-47	179.02	1	145.166	3.63764e-33	145.17	1	182.016	1.84464e-53	182.02	1	169.923	4.08262e-47	169.92	1	168.591	1.54631e-63	199.58	1	87.618	8.68708e-34
P08133	Annexin A6	ANXA6	135	1.4817	1.1815	0.9971		1.5977		0.53332				P08133	135	P08133	P08133	Annexin A6	ANXA6	sp|P08133|ANXA6_HUMAN Annexin A6 OS=Homo sapiens OX=9606 GN=ANXA6 PE=1 SV=3	1	51.8194	6.60739e-14	106.75	101.88	51.819	1	29.1357	0.0382021	29.136					1	70.9421	6.60739e-14	106.75					1	29.7663	1.14856e-06	66.893
P05067	Amyloid beta A4 protein;N-APP;Soluble APP-alpha;Soluble APP-beta;C99;Beta-amyloid protein 42;Beta-amyloid protein 40;C83;P3(42);P3(40);C80;Gamma-secretase C-terminal fragment 59;Gamma-secretase C-terminal fragment 57;Gamma-secretase C-terminal fragment 50;C31	APP	763	1.4816		1.0638		1.3254		1.3622		1.3409	1.4885	P05067	763	P05067	P05067	Amyloid beta A4 protein;N-APP;Soluble APP-alpha;Soluble APP-beta;C99;Beta-amyloid protein 42;Beta-amyloid protein 40;C83;P3(42);P3(40);C80;Gamma-secretase C-terminal fragment 59;Gamma-secretase C-terminal fragment 57;Gamma-secretase C-terminal fragment 50;C31	APP	sp|P05067|A4_HUMAN Amyloid-beta A4 protein OS=Homo sapiens OX=9606 GN=APP PE=1 SV=3	1	32.9255	0.000490453	53.519	53.519	32.926	1	23.3288	0.0184986	23.329					1	32.9255	0.0022023	32.926					1	15.2542	0.0571478	15.254
Q08945	FACT complex subunit SSRP1	SSRP1	39	1.481	1.4834	1.6863	1.3282	2.0191	2.9931	1.3371	0.87958	1.2421	1.3152	Q08945	39	Q08945	Q08945	FACT complex subunit SSRP1	SSRP1	sp|Q08945|SSRP1_HUMAN FACT complex subunit SSRP1 OS=Homo sapiens OX=9606 GN=SSRP1 PE=1 SV=1	1	77.5667	1.1787e-08	83.666	70.039	77.567	1	40.3836	0.000503972	40.384	1	31.358	8.83452e-05	49.773	1	83.6664	1.1787e-08	83.666	1	77.5667	5.11342e-08	77.567	1	27.4075	0.00845625	36.923	1	56.7083	0.000468658
Q8WUF8	Protein FAM172A	FAM172A	333	1.4809		0.98821	0.64475	0.83727						Q8WUF8	333	Q8WUF8	Q8WUF8	Protein FAM172A	FAM172A	sp|Q8WUF8|F172A_HUMAN Cotranscriptional regulator FAM172A OS=Homo sapiens OX=9606 GN=FAM172A PE=2 SV=1	1	97.2526	1.02148e-23	114.84	97.815	97.253	1	111.133	7.31804e-23	111.13	1	97.2526	9.24913e-19	97.253	1	52.9093	1.02148e-23	114.84
P29692	Elongation factor 1-delta	EEF1D	15		1.5527						1.3015			P29692	15	P29692	P29692	Elongation factor 1-delta	EEF1D	sp|P29692|EF1D_HUMAN Elongation factor 1-delta OS=Homo sapiens OX=9606 GN=EEF1D PE=1 SV=5	0.672184	3.11857	0.00329751	38.028	27.767	38.028																	0.563292	1.10543	0.0732163	29.733	0.587388	1.53383	0.0110381
O94964	Protein SOGA1;N-terminal form;C-terminal 80 kDa form	SOGA1	878	1.4804	1.3881	1.2942	1.5371	1.2022		1.5722				O94964	878	O94964	O94964	Protein SOGA1;N-terminal form;C-terminal 80 kDa form	SOGA1	sp|O94964|SOGA1_HUMAN Protein SOGA1 OS=Homo sapiens OX=9606 GN=SOGA1 PE=1 SV=2	0.99986	38.5391	1.55319e-05	82.651	82.651	78.285	0.999848	38.1948	1.55319e-05	82.651	0.99986	38.5391	2.95549e-05	78.285	0.999788	36.7308	4.36831e-05	73.887					0.999244	31.2099	0.000181313	63.037
O95997	Securin	PTTG1	48	1.4794	1.5674	1.5885	0.96815	1.0831	1.425	1.4758	1.3045		1.6286	O95997	48	O95997	O95997	Securin	PTTG1	sp|O95997|PTTG1_HUMAN Securin OS=Homo sapiens OX=9606 GN=PTTG1 PE=1 SV=1	1	87.2162	0.00129912	87.216	64.038	87.216	0.999977	46.4036	0.00246531	46.768	0.995533	23.4806	0.0359453	23.481	0.999986	48.4666	0.00834897	48.467	0.986956	18.7888	0.0544974	18.789	0.999994	52.1007	0.00129912	52.101	0.999467	32.734	0.010921
P26358	DNA (cytosine-5)-methyltransferase 1	DNMT1	586	1.4774	1.7928	2.1206	2.3436	1.4883	1.6209	0.74996	0.78678		3.0256	P26358	586	P26358	P26358	DNA (cytosine-5)-methyltransferase 1	DNMT1	sp|P26358|DNMT1_HUMAN DNA (cytosine-5)-methyltransferase 1 OS=Homo sapiens OX=9606 GN=DNMT1 PE=1 SV=2	1	77.5969	8.88971e-20	146.77	130.24	77.597	1	111.936	6.40719e-13	119.96	1	132.244	2.89234e-17	132.24	1	118.127	8.27533e-13	118.13	1	77.5969	3.02033e-09	105.19	1	92.1898	3.53813e-13	122.78	1	68.4405	2.16694e-05
P78552	Interleukin-13 receptor subunit alpha-1	IL13RA1	423	1.4772		1.1456		1.1994						P78552	423	P78552	P78552	Interleukin-13 receptor subunit alpha-1	IL13RA1	sp|P78552|I13R1_HUMAN Interleukin-13 receptor subunit alpha-1 OS=Homo sapiens OX=9606 GN=IL13RA1 PE=1 SV=1	0.873231	8.38118	0.000369012	57.679	57.679	57.679	0.824843	6.72944	0.000502535	55.196					0.873231	8.38118	0.000369012	57.679
P09874	Poly [ADP-ribose] polymerase 1	PARP1	119	1.4766	1.5244	1.3189	1.6448	1.6894		1.1772		0.54014	0.44571	P09874	119	P09874	P09874	Poly [ADP-ribose] polymerase 1	PARP1	sp|P09874|PARP1_HUMAN Poly [ADP-ribose] polymerase 1 OS=Homo sapiens OX=9606 GN=PARP1 PE=1 SV=4	1	102.397	1.26248e-21	134.75	122.17	102.4	1	99.5223	1.72971e-05	99.522	1	102.397	3.54864e-05	102.4	1	80.5339	2.23328e-05	80.534					1	134.749	1.26248e-21	134.75
P46013	Antigen KI-67	MKI67	2520	1.4766	1.2756	1.6795	1.2351	1.1288		1.7091	1.1153			P46013	2520	P46013	P46013	Antigen KI-67	MKI67	sp|P46013|KI67_HUMAN Proliferation marker protein Ki-67 OS=Homo sapiens OX=9606 GN=MKI67 PE=1 SV=2	0.846978	7.43117	7.04084e-23	123.41	123.41	123.41	0.842144	7.27127	6.31527e-14	102.37	0.846978	7.43117	7.04084e-23	123.41	0.790428	5.76529	3.51165e-12	92.492					0.790428	5.76529	3.51165e-12	92.492	0.82182	6.63919	1.34128e-17
Q9ULC5	Long-chain-fatty-acid--CoA ligase 5	ACSL5	603	1.4761	1.2662	1.4538	0.54837	0.57535	0.90824	0.84468		0.75841	0.7923	Q9ULC5	603	Q9ULC5	Q9ULC5	Long-chain-fatty-acid--CoA ligase 5	ACSL5	sp|Q9ULC5|ACSL5_HUMAN Long-chain-fatty-acid--CoA ligase 5 OS=Homo sapiens OX=9606 GN=ACSL5 PE=1 SV=1	1	56.3391	3.62468e-25	163.99	112.22	56.339	1	127.753	3.56276e-22	127.75	1	131.238	3.62468e-25	131.24	1	109.352	5.10448e-13	109.35	1	56.3391	6.12752e-05	56.339	1	119.446	7.55282e-17	119.45
P30305	M-phase inducer phosphatase 2	CDC25B	398	1.4749	1.215	1.3282	1.2598	1.0552		0.53548			1.6834	P30305	398	P30305	P30305	M-phase inducer phosphatase 2	CDC25B	sp|P30305|MPIP2_HUMAN M-phase inducer phosphatase 2 OS=Homo sapiens OX=9606 GN=CDC25B PE=1 SV=2	1	63.0873	7.01782e-09	87.85	87.85	72.184	0.993736	22.0039	0.010237	26.808	0.999704	35.2801	0.00658738	40.085	0.999994	52.1418	2.39513e-05	56.851					1	63.0873	3.67923e-05	72.184	0.997432	25.8928	0.0362247
Q96T88	E3 ubiquitin-protein ligase UHRF1	UHRF1	50	1.4748	1.6324	1.3547	1.5627	1.5491	1.4898	0.75044	0.77218	1.1449	1.2496	Q96T88	50	Q96T88	Q96T88	E3 ubiquitin-protein ligase UHRF1	UHRF1	sp|Q96T88|UHRF1_HUMAN E3 ubiquitin-protein ligase UHRF1 OS=Homo sapiens OX=9606 GN=UHRF1 PE=1 SV=1	1	36.5928	5.80703e-63	192.96	192.96	36.593	1	83.3141	1.01963e-47	177.74	1	45.1397	1.33858e-47	176.49	1	55.7548	1.01963e-47	177.74	1	36.5928	4.5619e-09	94.544	1	63.6823	5.80703e-63	192.96	1	50.6082	2.7354e-38
P62318	Small nuclear ribonucleoprotein Sm D3	SNRPD3	8	1.474	1.5334	0.82751	1.1498	1.1167						P62318	8	P62318	P62318	Small nuclear ribonucleoprotein Sm D3	SNRPD3	sp|P62318|SMD3_HUMAN Small nuclear ribonucleoprotein Sm D3 OS=Homo sapiens OX=9606 GN=SNRPD3 PE=1 SV=1	1	12.0616	3.71344e-06	51.586	46.266	12.062	1	16.6658	0.023857	16.666	1	12.0616	0.053062	12.062	1	22.3987	0.00670282	22.399
Q9UJX5	Anaphase-promoting complex subunit 4	ANAPC4	468	1.4739	1.6454	1.8286	1.6259	1.9735		2.8092	1.6492			Q9UJX5	468	Q9UJX5	Q9UJX5	Anaphase-promoting complex subunit 4	ANAPC4	sp|Q9UJX5|APC4_HUMAN Anaphase-promoting complex subunit 4 OS=Homo sapiens OX=9606 GN=ANAPC4 PE=1 SV=2	1	50.0403	0.00638811	58.981	58.981	50.04	1	40.0015	0.00788244	55.549	1	58.9807	0.00638811	58.981	1	48.7942	0.0114721	48.794					1	57.9598	0.00683269	57.96	1	50.0403	0.0104676
Q9Y3E5	Peptidyl-tRNA hydrolase 2, mitochondrial	PTRH2	47	1.4734	1.2913	1.3072	1.2668	1.1304	1.2055	0.98272	1.0798	1.037	1.1088	Q9Y3E5	47	Q9Y3E5	Q9Y3E5	Peptidyl-tRNA hydrolase 2, mitochondrial	PTRH2	sp|Q9Y3E5|PTH2_HUMAN Peptidyl-tRNA hydrolase 2, mitochondrial OS=Homo sapiens OX=9606 GN=PTRH2 PE=1 SV=1	1	151.021	2.82767e-55	152.81	135.79	152.81	1	107.347	3.01948e-19	109.05	1	99.082	3.3338e-14	102.48	1	135.185	1.65268e-43	139.26	1	67.5497	1.5679e-08	68.42	1	122.807	7.32352e-27	124.08	1	151.021	2.82767e-55
Q7KZF4	Staphylococcal nuclease domain-containing protein 1	SND1	71	1.4731	1.6907	1.485	1.6705	1.2712	1.2909	0.71808	0.74777			Q7KZF4	71	Q7KZF4	Q7KZF4	Staphylococcal nuclease domain-containing protein 1	SND1	sp|Q7KZF4|SND1_HUMAN Staphylococcal nuclease domain-containing protein 1 OS=Homo sapiens OX=9606 GN=SND1 PE=1 SV=1	1	106.666	2.90597e-67	165.74	165.74	106.67	1	113.474	1.53183e-22	113.47	1	145.613	1.29571e-44	145.61	1	165.74	2.90597e-67	165.74	1	106.666	6.83081e-22	106.67	1	148.259	8.15666e-55	148.26	1	134.372	2.08656e-35
P17096	High mobility group protein HMG-I/HMG-Y	HMGA1	55	1.4721	1.4196	1.3144	1.3578	1.2226	1.3189	1.0223	1.1291			P17096	55	P17096	P17096	High mobility group protein HMG-I/HMG-Y	HMGA1	sp|P17096|HMGA1_HUMAN High mobility group protein HMG-I/HMG-Y OS=Homo sapiens OX=9606 GN=HMGA1 PE=1 SV=3	1	40.1131	4.55276e-06	96.103	96.103	40.113	1	46.4619	4.55276e-06	96.103	1	56.2251	0.00191885	56.225	1	36.3204	0.00209331	54.7	1	40.1131	0.00682924	40.113	1	26.5142	3.29243e-05	85.813	1	61.4352	0.000910688
Q9Y4C1	Lysine-specific demethylase 3A	KDM3A	895	1.4719	1.3274	1.1953	1.8313			1.0274	1.0109			Q9Y4C1	895	Q9Y4C1	Q9Y4C1	Lysine-specific demethylase 3A	KDM3A	sp|Q9Y4C1|KDM3A_HUMAN Lysine-specific demethylase 3A OS=Homo sapiens OX=9606 GN=KDM3A PE=1 SV=4	0.995449	23.3996	1.26938e-12	118.13	59.451	118.13	0.993642	21.9389	1.26938e-12	117.2	0.986661	18.6905	3.23133e-06	88.561									0.993988	22.1837	0.000143666	78.069	0.989969	19.9428	0.000105212
Q00341	Vigilin	HDLBP	41	1.4717	1.2686					0.8246				Q00341	41	Q00341	Q00341	Vigilin	HDLBP	sp|Q00341|VIGLN_HUMAN Vigilin OS=Homo sapiens OX=9606 GN=HDLBP PE=1 SV=2	0.995659	23.6057	0.00157227	42.325	36.545	42.325																	0.995659	23.6057	0.00157227	42.325
Q9HAW4	Claspin	CLSPN	287	1.4717		1.3199		1.6642		0.85797				Q9HAW4	287	Q9HAW4	Q9HAW4	Claspin	CLSPN	sp|Q9HAW4|CLSPN_HUMAN Claspin OS=Homo sapiens OX=9606 GN=CLSPN PE=1 SV=3	1	28.6325	0.0069052	40.725	28.932	28.632	1	27.9692	0.0203852	27.969					1	28.6325	0.0623957	28.632					1	40.7246	0.0199653	40.725
Q6ZNB6	NF-X1-type zinc finger protein NFXL1	NFXL1	39	1.4716	1.7941	2.2269	2.7755	1.8671	1.672	0.91763	0.77836	0.5327	0.50484	Q6ZNB6	39	Q6ZNB6	Q6ZNB6	NF-X1-type zinc finger protein NFXL1	NFXL1	sp|Q6ZNB6|NFXL1_HUMAN NF-X1-type zinc finger protein NFXL1 OS=Homo sapiens OX=9606 GN=NFXL1 PE=1 SV=2	1	73.6762	3.61436e-44	136.53	120.83	73.676	1	80.6641	2.66876e-13	80.664	1	94.0799	2.41802e-25	94.08	1	103.632	2.27858e-26	103.63	1	73.6762	1.06802e-12	73.676	1	136.529	3.61436e-44	136.53	1	120.273	1.58037e-35
Q9UBC2	Epidermal growth factor receptor substrate 15-like 1	EPS15L1	534	1.4704	1.8891	1.2079	1.28	1.4356	1.3622	3.2453	2.3678	1.6678	1.7006	Q9UBC2	534	Q9UBC2	Q9UBC2	Epidermal growth factor receptor substrate 15-like 1	EPS15L1	sp|Q9UBC2|EP15R_HUMAN Epidermal growth factor receptor substrate 15-like 1 OS=Homo sapiens OX=9606 GN=EPS15L1 PE=1 SV=1	1	136.475	2.83719e-66	184.71	158.56	136.48	1	155.989	1.23338e-29	155.99	1	175.881	9.88584e-53	175.88	1	184.706	2.83719e-66	184.71	1	136.475	6.51151e-15	136.48	1	86.7382	0.000146555	86.738	1	147.909	5.60078e-22
Q14677	Clathrin interactor 1	CLINT1	207	1.47	1.8064	1.6168	1.4252	1.1986	1.3028	1.3497	0.77125			Q14677	207	Q14677	Q14677	Clathrin interactor 1	CLINT1	sp|Q14677|EPN4_HUMAN Clathrin interactor 1 OS=Homo sapiens OX=9606 GN=CLINT1 PE=1 SV=1	1	110.624	8.86998e-40	152.18	152.18	152.18	1	74.9166	1.04615e-08	84.829	1	67.2244	7.25483e-10	93.371	1	110.624	8.86998e-40	152.18	0.999987	48.7412	6.54779e-08	75.55	1	68.5781	1.15661e-09	92.993	1	67.4458	2.01736e-05
P49454	Centromere protein F	CENPF	1022	1.462	1.5415		1.5603	1.0559		1.2043				P49454	1022	P49454	P49454	Centromere protein F	CENPF	sp|P49454|CENPF_HUMAN Centromere protein F OS=Homo sapiens OX=9606 GN=CENPF PE=1 SV=2	0.667794	3.03236	0.000169038	70.963	56.705	70.963					0.529601	0.51482	0.0125375	30.998	0.667794	3.03236	0.000169038	70.963					0.588144	1.54738	0.00418302	40.552
P62277	40S ribosomal protein S13	RPS13	39	1.47	1.4596	1.6218	1.7063	1.6378		0.929		1.0753	1.2343	P62277	39	P62277	P62277	40S ribosomal protein S13	RPS13	sp|P62277|RS13_HUMAN 40S ribosomal protein S13 OS=Homo sapiens OX=9606 GN=RPS13 PE=1 SV=2	0.999363	31.9562	0.000135196	110.25	92.039	77.674	0.998716	28.9091	0.00654511	91.626	0.999	29.9978	0.0118107	77.741	0.998944	29.7576	0.0108459	79.116					0.999363	31.9562	0.0118574	77.674	0.999363	31.9562	0.0215558
P34932	Heat shock 70 kDa protein 4	HSPA4	754	1.47	0.92492	1.2051	1.1264	0.88419		1.3787	1.8921		0.64295	P34932	754	P34932	P34932	Heat shock 70 kDa protein 4	HSPA4	sp|P34932|HSP74_HUMAN Heat shock 70 kDa protein 4 OS=Homo sapiens OX=9606 GN=HSPA4 PE=1 SV=4	1	113.846	1.01963e-47	177.74	140.66	177.74	1	108.833	1.95685e-42	166.9	1	78.9075	5.38311e-13	112.17	1	113.846	1.01963e-47	177.74					1	108.833	1.95685e-42	166.9	0.999957	43.632	0.000133526
A6NHR9	Structural maintenance of chromosomes flexible hinge domain-containing protein 1	SMCHD1	812	1.4696	1.1071			1.1293		0.90101	0.87869	0.77649	0.68299	A6NHR9	812	A6NHR9	A6NHR9	Structural maintenance of chromosomes flexible hinge domain-containing protein 1	SMCHD1	sp|A6NHR9|SMHD1_HUMAN Structural maintenance of chromosomes flexible hinge domain-containing protein 1 OS=Homo sapiens OX=9606 GN=SMCHD1 PE=1 SV=2	0.994792	22.8105	3.38345e-19	115.74	85.208	115.74									0.5	0	1.97662e-05	53.779					0.96656	14.6096	3.38345e-19	92.29	0.5	0	1.74051e-05
Q8N3C0	Activating signal cointegrator 1 complex subunit 3	ASCC3	1482	1.4692				2.1117		0.95226				Q8N3C0	1482	Q8N3C0	Q8N3C0	Activating signal cointegrator 1 complex subunit 3	ASCC3	sp|Q8N3C0|ASCC3_HUMAN Activating signal cointegrator 1 complex subunit 3 OS=Homo sapiens OX=9606 GN=ASCC3 PE=1 SV=3	1	37.9535	0.000945673	56.569	47.97	37.954					1	46.282	0.016451	46.282	1	56.5691	0.000945673	56.569	1	37.9535	0.0405285	37.954	1	45.2069	0.0119614	45.207
Q12906	Interleukin enhancer-binding factor 3	ILF3	600	1.4685	1.5671	0.77481	1.5779				1.4307			Q12906	600	Q12906	Q12906	Interleukin enhancer-binding factor 3	ILF3	sp|Q12906|ILF3_HUMAN Interleukin enhancer-binding factor 3 OS=Homo sapiens OX=9606 GN=ILF3 PE=1 SV=3	0.804349	6.13961	6.96388e-06	94.728	64.669	81.904	0.616114	2.05459	0.00015127	78.814	0.804349	6.13961	6.39714e-05	81.904	0.601784	1.79322	4.27094e-05	94.728									0.587507	1.53597	0.00190258
Q9BYJ1	Hydroperoxide isomerase ALOXE3	ALOXE3	175	1.4673	1.5977	1.1228	1.1954			1.8386	2.6303	0.27926	0.30057	Q9BYJ1	175	Q9BYJ1	Q9BYJ1	Hydroperoxide isomerase ALOXE3	ALOXE3	sp|Q9BYJ1|LOXE3_HUMAN Hydroperoxide isomerase ALOXE3 OS=Homo sapiens OX=9606 GN=ALOXE3 PE=1 SV=1	1	112.893	7.43134e-49	212.39	160.55	112.89	1	149.357	1.24842e-48	149.36	1	153.142	7.43134e-49	153.14									1	140.058	4.60559e-38	140.06	1	112.893	4.42034e-17
P14866	Heterogeneous nuclear ribonucleoprotein L	HNRNPL	568;185	1.4672	1.1837	1.1865	1.1579	1.1027		0.77005		0.83024	0.80274	P14866;M0QYT0	568;185	P14866	P14866	Heterogeneous nuclear ribonucleoprotein L	HNRNPL	sp|P14866|HNRPL_HUMAN Heterogeneous nuclear ribonucleoprotein L OS=Homo sapiens OX=9606 GN=HNRNPL PE=1 SV=2;tr|M0QYT0|M0QYT0_HUMAN Uncharacterized protein (Fragment) OS=Homo sapiens OX=9606 PE=1 SV=1	0.999996	54.5065	9.31046e-35	173.89	173.89	112.88	0.999963	44.2904	8.29931e-14	80.102	0.999278	31.4109	7.63337e-20	89.829	0.99995	43.032	1.28701e-31	114.57					0.997268	25.6231	1.71797e-07	60.943
P07305	Histone H1.0;Histone H1.0, N-terminally processed	H1F0	82	1.4671	1.5531	1.4824	1.6203	1.6393	1.7337	1.1417	1.2189	0.57541	0.55948	P07305	82	P07305	P07305	Histone H1.0;Histone H1.0, N-terminally processed	H1F0	sp|P07305|H10_HUMAN Histone H1.0 OS=Homo sapiens OX=9606 GN=H1F0 PE=1 SV=3	0.999526	33.2379	2.24472e-09	123.79	123.79	113.93	0.997384	25.8117	2.78967e-05	94.465	0.966566	14.6104	0.00159008	64.55	0.999116	30.5335	2.24472e-09	121.36	0.957445	13.5216	0.000328022	78.342	0.998663	28.7316	5.42107e-05	98.249	0.99949	32.9211	0.000108413
Q00839	Heterogeneous nuclear ribonucleoprotein U	HNRNPU	31	1.4665										Q00839	31	Q00839	Q00839	Heterogeneous nuclear ribonucleoprotein U	HNRNPU	sp|Q00839|HNRPU_HUMAN Heterogeneous nuclear ribonucleoprotein U OS=Homo sapiens OX=9606 GN=HNRNPU PE=1 SV=6	1	50.1076	0.0056579	50.108	35.434	50.108
P37198	Nuclear pore glycoprotein p62	NUP62	445		1.537									P37198	445	P37198	P37198	Nuclear pore glycoprotein p62	NUP62	sp|P37198|NUP62_HUMAN Nuclear pore glycoprotein p62 OS=Homo sapiens OX=9606 GN=NUP62 PE=1 SV=3	1	28.7643	0.0163498	28.764	12.627	28.764
Q99733	Nucleosome assembly protein 1-like 4	NAP1L4	282	1.4663	1.2571	1.3766	1.3271	1.2002	1.1135	0.99993	0.89223			Q99733	282	Q99733	Q99733	Nucleosome assembly protein 1-like 4	NAP1L4	sp|Q99733|NP1L4_HUMAN Nucleosome assembly protein 1-like 4 OS=Homo sapiens OX=9606 GN=NAP1L4 PE=1 SV=1	1	132.122	4.80843e-49	155.11	155.11	155.11	1	66.4539	3.27589e-11	89.107	1	91.2449	7.59099e-17	111.06	1	83.2812	1.61031e-16	106.16	0.999999	62.6425	3.1418e-09	78.234	1	132.122	4.80843e-49	155.11	0.999997	54.9136	1.20452e-07
P55011	Solute carrier family 12 member 2	SLC12A2	1097	0.98465	1.5358									P55011	1097	P55011	P55011	Solute carrier family 12 member 2	SLC12A2	sp|P55011|S12A2_HUMAN Solute carrier family 12 member 2 OS=Homo sapiens OX=9606 GN=SLC12A2 PE=1 SV=1	0.555902	0.975187	0.0181994	25.342	18.568	25.342
Q96L50	Leucine-rich repeat protein 1	LRR1	135	1.4661	1.7907	1.315	1.8688			1.3663	1.6132			Q96L50	135	Q96L50	Q96L50	Leucine-rich repeat protein 1	LRR1	sp|Q96L50|LLR1_HUMAN Leucine-rich repeat protein 1 OS=Homo sapiens OX=9606 GN=LRR1 PE=1 SV=2	0.983589	17.7769	0.000823543	89.886	89.886	66.758	0.982903	17.5958	0.000836696	89.886	0.983589	17.7769	0.0017218	66.758	0.793074	5.83498	0.0255829	44.639					0.919079	10.5529	0.00367522	78.098	0.914251	10.2784	0.00479103
Q9UBU8	Mortality factor 4-like protein 1	MORF4L1	127	1.4652	1.2511	1.2037	1.2017	1.5463		1.1424	1.9931	1.3168	1.2854	Q9UBU8	127	Q9UBU8	Q9UBU8	Mortality factor 4-like protein 1	MORF4L1	sp|Q9UBU8|MO4L1_HUMAN Mortality factor 4-like protein 1 OS=Homo sapiens OX=9606 GN=MORF4L1 PE=1 SV=2	1	21.8408	1.04613e-38	161.17	134.66	21.841	1	148.321	2.79996e-22	148.32	1	74.162	0.0107459	74.162	1	87.2981	2.79072e-05	101.89					1	161.174	1.04613e-38	161.17	1	69.5777	0.00152987
P19338	Nucleolin	NCL	403	1.4647	1.0372	0.92601	1.3244			0.89433	1.1945	0.78315	0.63266	P19338	403	P19338	P19338	Nucleolin	NCL	sp|P19338|NUCL_HUMAN Nucleolin OS=Homo sapiens OX=9606 GN=NCL PE=1 SV=3	0.999994	52.1895	1.73436e-09	105.38	85.081	105.38	0.999195	30.9372	0.00105089	61.375	0.979047	16.6955	0.00566793	39.581	0.734233	4.41333	0.039875	38.799					0.999555	33.5185	0.000654634	78.655	0.877315	8.54362	0.00248827
Q8NCF5	NFATC2-interacting protein	NFATC2IP	129	1.4641	1.4635	1.205	1.2837	1.2363	0.89005	0.81348				Q8NCF5	129	Q8NCF5	Q8NCF5	NFATC2-interacting protein	NFATC2IP	sp|Q8NCF5|NF2IP_HUMAN NFATC2-interacting protein OS=Homo sapiens OX=9606 GN=NFATC2IP PE=1 SV=1	0.883496	8.79862	5.45013e-17	112.3	112.3	112.3	0.5	0	1.59179e-09	80.638	0.5	0	1.26614e-07	70.235	0.5	0	2.02303e-09	79.97	0.5	0	0.00195936	33.836	0.5	0	6.04876e-07	62.475
Q9NVJ2	ADP-ribosylation factor-like protein 8B	ARL8B	141	1.4633	1.3448	1.2763	1.3008	1.8565	1.2511	1.412	1.0904	0.4002	0.4173	Q9NVJ2	141	Q9NVJ2	Q9NVJ2	ADP-ribosylation factor-like protein 8B	ARL8B	sp|Q9NVJ2|ARL8B_HUMAN ADP-ribosylation factor-like protein 8B OS=Homo sapiens OX=9606 GN=ARL8B PE=1 SV=1	1	69.311	9.96491e-62	202.29	202.29	182.25	0.999915	40.7215	6.49676e-26	140.24	0.999999	60.7629	1.54536e-51	193.81	1	69.311	5.87167e-43	182.25	0.999993	51.4588	5.0641e-28	154.67	0.99957	33.6682	1.26278e-43	189.24	0.999994	51.9538	5.47373e-25
P07814	Bifunctional glutamate/proline--tRNA ligase;Glutamate--tRNA ligase;Proline--tRNA ligase	EPRS	902	1.4633		1.1184								P07814	902	P07814	P07814	Bifunctional glutamate/proline--tRNA ligase;Glutamate--tRNA ligase;Proline--tRNA ligase	EPRS	sp|P07814|SYEP_HUMAN Bifunctional glutamate/proline--tRNA ligase OS=Homo sapiens OX=9606 GN=EPRS PE=1 SV=5	0.819382	6.56727	0.000207477	47.082	47.082	47.082	0.819382	6.56727	0.000207477	47.082
P07814	Bifunctional glutamate/proline--tRNA ligase;Glutamate--tRNA ligase;Proline--tRNA ligase	EPRS	907	1.4633			0.58615							P07814	907	P07814	P07814	Bifunctional glutamate/proline--tRNA ligase;Glutamate--tRNA ligase;Proline--tRNA ligase	EPRS	sp|P07814|SYEP_HUMAN Bifunctional glutamate/proline--tRNA ligase OS=Homo sapiens OX=9606 GN=EPRS PE=1 SV=5	1	109.236	7.64588e-10	109.24	82.121	109.24					1	109.236	7.64588e-10	109.24
Q96J02	E3 ubiquitin-protein ligase Itchy homolog	ITCH	478	1.4632	1.5891	1.2069	1.4401	2.0286	1.185	1.3506	1.1024	1.0976	1.1439	Q96J02	478	Q96J02	Q96J02	E3 ubiquitin-protein ligase Itchy homolog	ITCH	sp|Q96J02|ITCH_HUMAN E3 ubiquitin-protein ligase Itchy homolog OS=Homo sapiens OX=9606 GN=ITCH PE=1 SV=2	1	19.3898	4.89205e-10	111.77	107.69	19.39	1	24.2998	2.76026e-07	80.975	1	22.221	4.89205e-10	102.5	1	31.8832	9.74771e-08	86.213	1	43.2605	0.000575038	43.261	1	43.8482	5.21758e-07	77.39	1	19.3898	3.10977e-05
Q00403	Transcription initiation factor IIB	GTF2B	119	1.4632		1.3504				0.994		1.1517	1.1272	Q00403	119	Q00403	Q00403	Transcription initiation factor IIB	GTF2B	sp|Q00403|TF2B_HUMAN Transcription initiation factor IIB OS=Homo sapiens OX=9606 GN=GTF2B PE=1 SV=1	1	33.547	5.10983e-05	90.853	90.853	33.547	1	27.9403	0.0125671	27.94													1	33.547	0.0060925	33.547
P23508	Colorectal mutant cancer protein	MCC	766	1.4631	0.63148		2.7793			1.4358				P23508	766	P23508	P23508	Colorectal mutant cancer protein	MCC	sp|P23508|CRCM_HUMAN Colorectal mutant cancer protein OS=Homo sapiens OX=9606 GN=MCC PE=1 SV=2	1	30.1334	4.49108e-05	79.875	75.632	30.133					1	30.1334	0.0111096	30.133									1	24.5584	0.0685211	24.558
Q99536	Synaptic vesicle membrane protein VAT-1 homolog	VAT1	251	1.4031	1.5306	1.3948	1.3664	1.5532	1.9474	1.2572	1.1129		0.81896	Q99536	251	Q99536	Q99536	Synaptic vesicle membrane protein VAT-1 homolog	VAT1	sp|Q99536|VAT1_HUMAN Synaptic vesicle membrane protein VAT-1 homolog OS=Homo sapiens OX=9606 GN=VAT1 PE=1 SV=2	0.554924	0.957985	1.46991e-24	115.42	108.77	115.42	0.51364	0.237001	0.0755409	9.2329	0.533956	0.590782	1.51379e-08	67.227	0.554924	0.957985	1.46991e-24	115.42	0.534884	0.606992	1.50658e-08	67.251	0.552234	0.910726	2.7505e-16	91.64	0.53832	0.667001	3.32243e-18
P61289	Proteasome activator complex subunit 3	PSME3	121	1.4624	0.9027	1.5496	1.3773	0.82179		1.2705				P61289	121	P61289	P61289	Proteasome activator complex subunit 3	PSME3	sp|P61289|PSME3_HUMAN Proteasome activator complex subunit 3 OS=Homo sapiens OX=9606 GN=PSME3 PE=1 SV=1	0.986872	18.7607	4.52526e-05	76.713	63.287	57.338	0.770454	5.25876	0.000371448	45.608	0.823824	6.69887	0.00105204	58.997	0.986872	18.7607	4.52526e-05	57.338					0.956061	13.3763	8.1776e-05	76.713
O76080	AN1-type zinc finger protein 5	ZFAND5	209	1.4622	1.0118	1.052	0.78711	1.0035		0.63464	0.96014			O76080	209	O76080	O76080	AN1-type zinc finger protein 5	ZFAND5	sp|O76080|ZFAN5_HUMAN AN1-type zinc finger protein 5 OS=Homo sapiens OX=9606 GN=ZFAND5 PE=1 SV=1	1	36.519	1.10937e-05	90.759	79.067	36.519	1	34.0003	0.000501832	65.472	0.999998	57.165	0.000584551	63.894	1	59.3058	0.000318311	68.972	1	36.519	0.0482356	36.519	1	51.8748	1.10937e-05	90.759	1	55.3137	0.00159835
Q96T88	E3 ubiquitin-protein ligase UHRF1	UHRF1	525	1.4619		1.1968		1.2396				1.2208	1.3076	Q96T88	525	Q96T88	Q96T88	E3 ubiquitin-protein ligase UHRF1	UHRF1	sp|Q96T88|UHRF1_HUMAN E3 ubiquitin-protein ligase UHRF1 OS=Homo sapiens OX=9606 GN=UHRF1 PE=1 SV=1	1	57.8259	3.21313e-44	138.69	132.33	57.826	1	119.873	7.36483e-28	119.87					1	57.8259	5.40879e-06	57.826
Q14677	Clathrin interactor 1	CLINT1	192	1.4615	1.3748	1.4711	1.2664	1.3526		0.72751	0.96587			Q14677	192	Q14677	Q14677	Clathrin interactor 1	CLINT1	sp|Q14677|EPN4_HUMAN Clathrin interactor 1 OS=Homo sapiens OX=9606 GN=CLINT1 PE=1 SV=1	0.99993	41.537	0.00714925	42.788	42.788	42.788	0.998647	28.6809	0.0227997	29.341	0.992013	20.9415	0.0571395	20.942	0.99993	41.537	0.00714925	42.788					0.999289	31.4782	0.0198478	31.478	0.997721	26.4117	0.0339711
Q9Y2P8	RNA 3'-terminal phosphate cyclase-like protein	RCL1	175	1.4613	1.0079	1.0445	1.2918	0.87099		0.97703				Q9Y2P8	175	Q9Y2P8	Q9Y2P8	RNA 3'-terminal phosphate cyclase-like protein	RCL1	sp|Q9Y2P8|RCL1_HUMAN RNA 3'-terminal phosphate cyclase-like protein OS=Homo sapiens OX=9606 GN=RCL1 PE=1 SV=3	1	15.7655	1.34481e-06	96.059	96.059	15.766	0.997874	26.7148	6.19371e-05	80.469	0.999485	32.8784	1.34481e-06	96.059	1	15.7655	0.0450578	15.766					0.970327	15.1456	0.00223474	71.268
Q9UNY4	Transcription termination factor 2	TTF2	567	1.4613		0.63997		0.98957						Q9UNY4	567	Q9UNY4	Q9UNY4	Transcription termination factor 2	TTF2	sp|Q9UNY4|TTF2_HUMAN Transcription termination factor 2 OS=Homo sapiens OX=9606 GN=TTF2 PE=1 SV=2	0.999677	34.9075	3.28169e-09	68.375	68.375	63.573	0.986936	18.7821	3.28169e-09	68.375	0.801818	6.07012	0.0142544	29.745	0.832884	6.97565	4.50492e-06	51.234
Q16630	Cleavage and polyadenylation specificity factor subunit 6	CPSF6	185	1.4602	1.1641	1.309	0.83545	1.2021	0.92369	1.0438	0.8983	1.512	2.1515	Q16630	185	Q16630	Q16630	Cleavage and polyadenylation specificity factor subunit 6	CPSF6	sp|Q16630|CPSF6_HUMAN Cleavage and polyadenylation specificity factor subunit 6 OS=Homo sapiens OX=9606 GN=CPSF6 PE=1 SV=2	1	37.2369	5.98853e-35	129.32	129.32	37.237	1	118.524	1.45189e-27	118.52	1	37.2369	1.85268e-27	116.39	1	103.27	7.79992e-19	103.27	1	129.316	5.98853e-35	129.32	1	105.671	7.60552e-22	105.67	1	126.313	8.30597e-35
Q15907	Ras-related protein Rab-11A;Ras-related protein Rab-11B	RAB11A;RAB11B	125;125	1.4596		0.73992		0.53655		0.98118				P62491;Q15907	125;125	P62491;Q15907	Q15907	Ras-related protein Rab-11A;Ras-related protein Rab-11B	RAB11A;RAB11B	sp|P62491|RB11A_HUMAN Ras-related protein Rab-11A OS=Homo sapiens OX=9606 GN=RAB11A PE=1 SV=3;sp|Q15907|RB11B_HUMAN Ras-related protein Rab-11B OS=Homo sapiens OX=9606 GN=RAB11B PE=1 SV=4	1	37.8841	1.31843e-05	64.2	46.061	37.884	1	28.5054	0.00437449	28.505	1	37.8841	0.000421269	64.2	1	56.0808	0.000445975	56.081					1	57.3663	1.31843e-05	57.366
Q14444	Caprin-1	CAPRIN1	64	1.6411	1.5283	1.8063	1.0596	1.4389		0.86764	0.86423			Q14444	64	Q14444	Q14444	Caprin-1	CAPRIN1	sp|Q14444|CAPR1_HUMAN Caprin-1 OS=Homo sapiens OX=9606 GN=CAPRIN1 PE=1 SV=2	0.578477	1.37464	0.0079378	69.598	26.352	69.598	0.54906	0.855011	0.00837097	42.395	0.562153	1.08533	0.0302404	48.283	0.539062	0.679958	0.0166206	34.692					0.555714	0.97188	0.0079378	67.993	0.54906	0.855011	0.00837097
Q9NVP1	ATP-dependent RNA helicase DDX18	DDX18	571		1.528					0.68277				Q9NVP1	571	Q9NVP1	Q9NVP1	ATP-dependent RNA helicase DDX18	DDX18	sp|Q9NVP1|DDX18_HUMAN ATP-dependent RNA helicase DDX18 OS=Homo sapiens OX=9606 GN=DDX18 PE=1 SV=2	0.615798	2.04879	0.000345973	59.185	59.185	59.185																	0.615798	2.04879	0.000345973	59.185
Q01082	Spectrin beta chain, non-erythrocytic 1	SPTBN1	2344	1.4581	1.0419	1.2885	1.482	1.0893		1.1703		2.2245	2.0177	Q01082	2344	Q01082	Q01082	Spectrin beta chain, non-erythrocytic 1	SPTBN1	sp|Q01082|SPTB2_HUMAN Spectrin beta chain, non-erythrocytic 1 OS=Homo sapiens OX=9606 GN=SPTBN1 PE=1 SV=2	1	76.0266	5.69016e-13	93.684	85.595	76.027	1	66.8738	1.21741e-07	66.874	1	76.0266	1.54088e-09	76.027	1	56.3274	7.89469e-06	56.327					1	93.6838	5.69016e-13	93.684
O00571	ATP-dependent RNA helicase DDX3X	DDX3X	81	1.458	1.3677	1.5024	1.8422	1.57		0.99429	0.93277	0.84456	0.81424	O00571	81	O00571	O00571	ATP-dependent RNA helicase DDX3X	DDX3X	sp|O00571|DDX3X_HUMAN ATP-dependent RNA helicase DDX3X OS=Homo sapiens OX=9606 GN=DDX3X PE=1 SV=3	1	18.7453	0.00315162	67.704	67.704	18.745	1	65.3052	0.01343	65.305	1	38.7503	0.0131993	38.75	1	60.5185	0.00315162	60.518					1	26.7862	0.0391897	26.786	1	18.7453	0.0755287
O75608	Acyl-protein thioesterase 1	LYPLA1	224	1.458	1.1253	1.2127		1.2494	1.4355	1.4238	1.4763			O75608	224	O75608	O75608	Acyl-protein thioesterase 1	LYPLA1	sp|O75608|LYPA1_HUMAN Acyl-protein thioesterase 1 OS=Homo sapiens OX=9606 GN=LYPLA1 PE=1 SV=1	1	60.4363	6.50821e-06	105.1	89.439	60.436	1	50.878	0.0161934	50.878					1	101.721	4.84269e-05	101.72	1	60.4363	0.0114704	60.436	1	81.5478	0.0010965	81.548	1	73.6646	0.00280734
Q5TFE4	5'-nucleotidase domain-containing protein 1	NT5DC1	43		1.5259		1.0144				1.4753			Q5TFE4	43	Q5TFE4	Q5TFE4	5'-nucleotidase domain-containing protein 1	NT5DC1	sp|Q5TFE4|NT5D1_HUMAN 5'-nucleotidase domain-containing protein 1 OS=Homo sapiens OX=9606 GN=NT5DC1 PE=1 SV=1	0.5	0	4.71665e-09	71.174	58.619	40.381					0.5	0	4.71665e-09	71.174													0.5	0	0.00293193
Q5TFE4	5'-nucleotidase domain-containing protein 1	NT5DC1	45		1.5259		1.0144				1.4753			Q5TFE4	45	Q5TFE4	Q5TFE4	5'-nucleotidase domain-containing protein 1	NT5DC1	sp|Q5TFE4|NT5D1_HUMAN 5'-nucleotidase domain-containing protein 1 OS=Homo sapiens OX=9606 GN=NT5DC1 PE=1 SV=1	0.5	0	4.71665e-09	71.174	58.619	40.381					0.5	0	4.71665e-09	71.174													0.5	0	0.00293193
Q99442	Translocation protein SEC62	SEC62	51	1.4577	1.9727	2.1083		1.7015		0.98289	1.1512			Q99442	51	Q99442	Q99442	Translocation protein SEC62	SEC62	sp|Q99442|SEC62_HUMAN Translocation protein SEC62 OS=Homo sapiens OX=9606 GN=SEC62 PE=1 SV=1	1	65.2261	4.25474e-13	110.37	100.96	110.37	0.999996	53.5946	7.55298e-07	73.983					1	65.2261	4.25474e-13	110.37					0.998921	29.6641	0.00198472	50.053	0.999017	30.07	0.000943326
Q9H089	Large subunit GTPase 1 homolog	LSG1	81	1.4576		1.1173	1.1849	1.0294		1.4488				Q9H089	81	Q9H089	Q9H089	Large subunit GTPase 1 homolog	LSG1	sp|Q9H089|LSG1_HUMAN Large subunit GTPase 1 homolog OS=Homo sapiens OX=9606 GN=LSG1 PE=1 SV=2	1	31.7218	0.00261805	54.7	46.789	31.722	1	44.2994	0.00279956	52.693	1	31.7218	0.00261805	54.7	1	45.257	0.00485735	45.257					1	21.7587	0.0113862	35.677
Q9Y6A5	Transforming acidic coiled-coil-containing protein 3	TACC3	107		1.5231	1.5235								Q9Y6A5	107	Q9Y6A5	Q9Y6A5	Transforming acidic coiled-coil-containing protein 3	TACC3	sp|Q9Y6A5|TACC3_HUMAN Transforming acidic coiled-coil-containing protein 3 OS=Homo sapiens OX=9606 GN=TACC3 PE=1 SV=1	0.511584	0.201267	0.00451408	21.052	12.214	21.052	0.5	0	0.0177014	16.106
Q9P2E9	Ribosome-binding protein 1	RRBP1	687	1.4573										Q9P2E9	687	Q9P2E9	Q9P2E9	Ribosome-binding protein 1	RRBP1	sp|Q9P2E9|RRBP1_HUMAN Ribosome-binding protein 1 OS=Homo sapiens OX=9606 GN=RRBP1 PE=1 SV=5	0.980092	16.9225	5.36788e-08	103.21	103.21	103.21
P29373	Cellular retinoic acid-binding protein 2	CRABP2	83	1.4571	1.4751	1.3064		1.5376	1.745	2.4617		0.82288	0.87421	P29373	83	P29373	P29373	Cellular retinoic acid-binding protein 2	CRABP2	sp|P29373|RABP2_HUMAN Cellular retinoic acid-binding protein 2 OS=Homo sapiens OX=9606 GN=CRABP2 PE=1 SV=2	0.996724	24.8327	2.57593e-76	199.15	185.53	199.15	0.996724	24.8327	2.57593e-76	199.15					0.673849	3.15144	1.67326e-38	139.81	0.862894	7.989	9.56101e-30	133.16	0.993482	21.8304	1.86756e-49	154.74
Q12996	Cleavage stimulation factor subunit 3	CSTF3	682	1.4562	1.4354		1.3899	1.2213		0.41089	0.35252	0.72841	0.83171	Q12996	682	Q12996	Q12996	Cleavage stimulation factor subunit 3	CSTF3	sp|Q12996|CSTF3_HUMAN Cleavage stimulation factor subunit 3 OS=Homo sapiens OX=9606 GN=CSTF3 PE=1 SV=1	0.990089	19.9955	2.15851e-213	265.49	265.49	182.72					0.745306	4.66317	1.11633e-85	159.36	0.796921	5.93751	2.16341e-130	204.61					0.946959	12.5172	2.0666e-143	216.51	0.978418	16.5642	2.71301e-119
P55327	Tumor protein D52	TPD52	125;125	1.4557		1.4599				1.5609				H0YC42;P55327	125;125	H0YC42;P55327	P55327	Tumor protein D52	TPD52	tr|H0YC42|H0YC42_HUMAN Uncharacterized protein OS=Homo sapiens OX=9606 PE=4 SV=2;sp|P55327|TPD52_HUMAN Tumor protein D52 OS=Homo sapiens OX=9606 GN=TPD52 PE=1 SV=2	0.999999	59.6756	8.7916e-06	65.943	65.943	65.943	0.999999	59.6756	8.7916e-06	65.943													0.99993	41.5648	0.000219911	48.883
O00154	Cytosolic acyl coenzyme A thioester hydrolase	ACOT7	172	1.4551		0.77893			1.1976			1.2304	0.90084	O00154	172	O00154	O00154	Cytosolic acyl coenzyme A thioester hydrolase	ACOT7	sp|O00154|BACH_HUMAN Cytosolic acyl coenzyme A thioester hydrolase OS=Homo sapiens OX=9606 GN=ACOT7 PE=1 SV=3	0.897659	9.4306	1.62645e-05	76.391	69.233	68.944	0.897659	9.4306	4.767e-05	68.944									0.543595	0.759246	0.00179812	41.743
Q8N0T1	Uncharacterized protein C8orf59	C8orf59	24	1.6014	1.5192	1.2245		1.2722	1.4146		1.3094			Q8N0T1	24	Q8N0T1	Q8N0T1	Uncharacterized protein C8orf59	C8orf59	sp|Q8N0T1|CH059_HUMAN Uncharacterized protein C8orf59 OS=Homo sapiens OX=9606 GN=C8orf59 PE=1 SV=4	0.631202	2.3338	4.23362e-13	131.17	131.17	94.191	0.5	0	0.000848463	76.465					0.5	0	5.1999e-13	128.36	0.586174	1.51208	0.000992376	62.14					0.534126	0.593747	0.00434031
Q13573	SNW domain-containing protein 1	SNW1	266	1.4543	1.3516	1.4295	0.93522	1.4	1.2586	0.97842	1.1256			Q13573	266	Q13573	Q13573	SNW domain-containing protein 1	SNW1	sp|Q13573|SNW1_HUMAN SNW domain-containing protein 1 OS=Homo sapiens OX=9606 GN=SNW1 PE=1 SV=1	1	57.8586	0.00312565	60.59	42.554	57.859	1	47.1977	0.00609189	47.198	1	45.0222	0.00705839	45.161	1	55.9084	0.00349329	55.908	1	57.8586	0.00312565	57.859	1	60.5898	0.00349329	60.59	1	56.2581	0.00342738
Q09666	Neuroblast differentiation-associated protein AHNAK	AHNAK	3363	1.4538	1.7366	1.7562	1.4581	1.7556	1.699	1.5019	1.2718	1.3084	1.3383	Q09666	3363	Q09666	Q09666	Neuroblast differentiation-associated protein AHNAK	AHNAK	sp|Q09666|AHNK_HUMAN Neuroblast differentiation-associated protein AHNAK OS=Homo sapiens OX=9606 GN=AHNAK PE=1 SV=2	1	126.211	3.06483e-38	171.29	152.23	171.29	1	126.211	1.02342e-31	171.29	0.999999	61.3862	4.84932e-09	93.909	1	87.1716	8.77524e-33	141.32	1	83.1734	8.23954e-18	118.5	1	90.4604	2.64124e-12	112.51	1	75.2782	1.45632e-12
Q16881	Thioredoxin reductase 1, cytoplasmic	TXNRD1	462		1.5178		0.97436	1.2615		0.75808				Q16881	462	Q16881	Q16881	Thioredoxin reductase 1, cytoplasmic	TXNRD1	sp|Q16881|TRXR1_HUMAN Thioredoxin reductase 1, cytoplasmic OS=Homo sapiens OX=9606 GN=TXNRD1 PE=1 SV=3	0.648147	2.65312	0.000225415	69.602	55.939	43.405					0.648147	2.65312	0.00339474	43.405	0.531161	0.542019	0.000772973	58.752					0.544325	0.772037	0.00567729	38.366
Q15459	Splicing factor 3A subunit 1	SF3A1	499	1.4536	0.60162		0.75095	0.33471						Q15459	499	Q15459	Q15459	Splicing factor 3A subunit 1	SF3A1	sp|Q15459|SF3A1_HUMAN Splicing factor 3A subunit 1 OS=Homo sapiens OX=9606 GN=SF3A1 PE=1 SV=1	0.87228	8.34397	3.79342e-29	107.08	96.401	107.08					0.751282	4.80095	0.00452825	25.823	0.87228	8.34397	3.79342e-29	107.08
P46013	Antigen KI-67	MKI67	2009	1.4535	1.1319	1.4258	1.1267	0.88592	1.0449	1.0774	1.1382	0.80676	0.66024	P46013	2009	P46013	P46013	Antigen KI-67	MKI67	sp|P46013|KI67_HUMAN Proliferation marker protein Ki-67 OS=Homo sapiens OX=9606 GN=MKI67 PE=1 SV=2	1	69.5814	0.000203847	73.466	64.512	73.466	0.999473	32.7801	0.0106542	34.685	0.999998	56.8913	0.00106333	61.235	1	69.5814	0.000203847	73.466	0.999988	49.0405	0.00145037	56.951	0.999994	52.4173	0.00178465	53.252	0.999998	57.257	0.00116033
P61604	10 kDa heat shock protein, mitochondrial	HSPE1;HSPE1-MOB4	28;28	1.4519	1.5385	1.1655	1.455	1.3137		1.7035	1.6216		1.1672	P61604;S4R3N1	28;28	P61604;S4R3N1	P61604	10 kDa heat shock protein, mitochondrial	HSPE1;HSPE1-MOB4	sp|P61604|CH10_HUMAN 10 kDa heat shock protein, mitochondrial OS=Homo sapiens OX=9606 GN=HSPE1 PE=1 SV=2;tr|S4R3N1|S4R3N1_HUMAN HSPE1-MOB4 readthrough OS=Homo sapiens OX=9606 GN=HSPE1-MOB4 PE=3 SV=1	0.99952	33.1823	8.3821e-10	102.78	102.78	102.78	0.998795	29.1832	2.60098e-07	83.418	0.878813	8.6044	0.000231265	52.026	0.944191	12.2836	1.87059e-05	65.107					0.995115	23.0903	1.36784e-06	74.786	0.989048	19.5574	2.09432e-06
Q9UKV3	Apoptotic chromatin condensation inducer in the nucleus	ACIN1	861	1.4519	1.1491	1.6272	0.98078	1.3834	1.0408	0.79226	0.84809	0.56502		Q9UKV3	861	Q9UKV3	Q9UKV3	Apoptotic chromatin condensation inducer in the nucleus	ACIN1	sp|Q9UKV3|ACINU_HUMAN Apoptotic chromatin condensation inducer in the nucleus OS=Homo sapiens OX=9606 GN=ACIN1 PE=1 SV=2	0.999999	61.5322	0.000865035	61.532	51.161	61.532	0.999969	45.1154	0.00314824	45.115	0.999983	47.6215	0.00247473	47.621	0.999998	56.5691	0.00123643	56.569	0.999999	61.5322	0.000865035	61.532	0.999974	45.8253	0.0106017	45.825	0.999991	50.5625	0.00168833
P62993	Growth factor receptor-bound protein 2	GRB2	69	1.4511	1.0998		0.78429		1.0226	1.0889	1.1814			P62993	69	P62993	P62993	Growth factor receptor-bound protein 2	GRB2	sp|P62993|GRB2_HUMAN Growth factor receptor-bound protein 2 OS=Homo sapiens OX=9606 GN=GRB2 PE=1 SV=1	1	106.81	5.25619e-05	112.71	74.983	110.38					1	82.9443	0.00711795	91.265	0.999998	56.4206	0.0705668	60.167	0.999999	59.4886	0.0590306	63.076	1	104.442	5.25619e-05	112.71	1	106.81	0.000764006
Q8WXI9	Transcriptional repressor p66-beta	GATAD2B	73		1.5138			0.85102		1.0967	0.81802			Q8WXI9	73	Q8WXI9	Q8WXI9	Transcriptional repressor p66-beta	GATAD2B	sp|Q8WXI9|P66B_HUMAN Transcriptional repressor p66-beta OS=Homo sapiens OX=9606 GN=GATAD2B PE=1 SV=1	0.573532	1.28671	4.62597e-12	75.589	53.786	22.902									0.524611	0.427879	0.000179723	39.935					0.513046	0.226681	0.0550709	14.775	0.553132	0.926496	4.62597e-12
Q9C005	Protein dpy-30 homolog	DPY30	45	1.4509	0.97152		1.5443	0.69682	1.2997	1.3476	1.4623	1.0744		Q9C005	45	Q9C005	Q9C005	Protein dpy-30 homolog	DPY30	sp|Q9C005|DPY30_HUMAN Protein dpy-30 homolog OS=Homo sapiens OX=9606 GN=DPY30 PE=1 SV=1	1	44.2994	0.000414494	76.165	64.473	44.299					1	21.5496	0.0493091	21.55	1	53.6003	0.00686159	53.6	1	44.2994	0.00519497	44.299	1	45.257	0.00485735	45.257	1	50.1492	0.00313249
Q9BXF6	Rab11 family-interacting protein 5	RAB11FIP5	586	1.4507	1.4453	1.7193	1.593	0.90077	1.0376	1.6493	1.5721	1.5186	1.6098	Q9BXF6	586	Q9BXF6	Q9BXF6	Rab11 family-interacting protein 5	RAB11FIP5	sp|Q9BXF6|RFIP5_HUMAN Rab11 family-interacting protein 5 OS=Homo sapiens OX=9606 GN=RAB11FIP5 PE=1 SV=1	1	226.062	5.77492e-104	254.07	193.3	235.49	1	243.617	5.77492e-104	254.07	1	215.479	1.78646e-71	228.83	1	211.532	1.73282e-71	229	1	226.062	2.04647e-86	235.49	1	176.319	2.56375e-28	184.03	1	214.076	3.3207e-71
Q53GA4	Pleckstrin homology-like domain family A member 2	PHLDA2	2	1.4506	0.98721	0.87442	0.90924	0.89003		1.2378	0.70905	0.70434	0.56355	Q53GA4	2	Q53GA4	Q53GA4	Pleckstrin homology-like domain family A member 2	PHLDA2	sp|Q53GA4|PHLA2_HUMAN Pleckstrin homology-like domain family A member 2 OS=Homo sapiens OX=9606 GN=PHLDA2 PE=1 SV=2	1	29.0868	0.00854961	75.509	41.122	29.087	1	13.0532	0.059833	13.053	1	29.0868	0.0169687	52.49	1	51.2762	0.0113693	51.276					1	63.5339	0.00854961	63.534	1	34.6924	0.0715359
Q86UP2	Kinectin	KTN1	269		1.513		1.6662			1.3366				Q86UP2	269	Q86UP2	Q86UP2	Kinectin	KTN1	sp|Q86UP2|KTN1_HUMAN Kinectin OS=Homo sapiens OX=9606 GN=KTN1 PE=1 SV=1	0.555389	0.995943	1.67863e-05	50.957	46.519	25.544					0.555389	0.995943	1.67863e-05	50.957									0.542232	0.74674	0.00185544	49.224
Q9NRZ5	1-acyl-sn-glycerol-3-phosphate acyltransferase delta	AGPAT4	276		1.5115									Q9NRZ5	276	Q9NRZ5	Q9NRZ5	1-acyl-sn-glycerol-3-phosphate acyltransferase delta	AGPAT4	sp|Q9NRZ5|PLCD_HUMAN 1-acyl-sn-glycerol-3-phosphate acyltransferase delta OS=Homo sapiens OX=9606 GN=AGPAT4 PE=1 SV=1	0.794785	5.88041	0.00028372	38.583	32.863	38.583
P54259	Atrophin-1	ATN1	947	1.4506	0.6367	0.94588	0.49696	0.77267		0.98609				P54259	947	P54259	P54259	Atrophin-1	ATN1	sp|P54259|ATN1_HUMAN Atrophin-1 OS=Homo sapiens OX=9606 GN=ATN1 PE=1 SV=3	0.962382	14.0796	4.90626e-07	59.691	53.661	59.691	0.962382	14.0796	4.90626e-07	59.691	0.958495	13.6349	0.00026744	29.154	0.801412	6.05903	2.72305e-05	44.596					0.764128	5.10491	0.00248058	25.955
P12004	Proliferating cell nuclear antigen	PCNA	164	1.4505	2.0456	1.4314	1.7318	1.9067	2.2651	0.70512	0.70396	0.59119	0.62971	P12004	164	P12004	P12004	Proliferating cell nuclear antigen	PCNA	sp|P12004|PCNA_HUMAN Proliferating cell nuclear antigen OS=Homo sapiens OX=9606 GN=PCNA PE=1 SV=1	1	76.8891	0	389.81	389.81	389.81	0.999481	32.8487	0	336.37	0.999938	42.0877	0	327.47	0.999965	44.5089	0	350.02	0.999785	36.6648	1.6878e-234	290.39	0.999941	42.2588	8.03484e-262	309.14	0.999997	55.3759	7.79815e-210
Q12981	Vesicle transport protein SEC20	BNIP1	125	1.4491	1.4509	1.9298	1.8794	1.2271		1.1625				Q12981	125	Q12981	Q12981	Vesicle transport protein SEC20	BNIP1	sp|Q12981|SEC20_HUMAN Vesicle transport protein SEC20 OS=Homo sapiens OX=9606 GN=BNIP1 PE=1 SV=3	1	63.1224	4.3325e-35	134.66	127.86	63.122	1	84.5725	4.59444e-16	84.573	1	63.1224	6.54569e-08	63.122	1	134.657	4.3325e-35	134.66					1	17.9262	3.50287e-11	73.546
Q02447	Transcription factor Sp3	SP3	593	1.4489	1.5015	1.7526	1.4063	1.2394	1.3357	1.1713	1.2103			Q02447	593	Q02447	Q02447	Transcription factor Sp3	SP3	sp|Q02447|SP3_HUMAN Transcription factor Sp3 OS=Homo sapiens OX=9606 GN=SP3 PE=1 SV=3	1	97.5791	8.65302e-44	169.25	159.67	97.579	1	169.252	8.65302e-44	169.25	1	115.501	1.72294e-18	122.31	1	146.159	3.37942e-39	155.92	1	97.5791	1.3089e-09	97.579	1	134.855	7.09631e-34	140.81	1	121.815	6.0131e-19
Q16625	Occludin	OCLN	299	1.4488	1.6017	1.1291	1.0887	1.3441	1.1652		1.5349	0.43605	0.4621	Q16625	299	Q16625	Q16625	Occludin	OCLN	sp|Q16625|OCLN_HUMAN Occludin OS=Homo sapiens OX=9606 GN=OCLN PE=1 SV=1	1	30.0319	7.64703e-42	107.96	107.96	30.032	1	25.4568	0.00123358	25.457	1	50.9079	1.66987e-09	50.908	1	107.938	7.64703e-42	107.94	1	85.4411	1.2681e-23	85.441					1	57.4266	1.73778e-21
Q92522	Histone H1x	H1FX	143		1.5083	1.746			1.1127	0.89792	1.2203			Q92522	143	Q92522	Q92522	Histone H1x	H1FX	sp|Q92522|H1X_HUMAN Histone H1x OS=Homo sapiens OX=9606 GN=H1FX PE=1 SV=1	0.5	0	1.23654e-05	63.128	48.442	46.926	0.5	0	0.0481575	16.306									0.5	0	0.000343554	46.926	0.5	0	1.7042e-05	61.097	0.5	0	0.00203771
Q9UJK0	Ribosome biogenesis protein TSR3 homolog	TSR3	103	1.4485	1.2557	1.0426	0.8735	1.0337	0.66364	0.92435	1.4315		1.6182	Q9UJK0	103	Q9UJK0	Q9UJK0	Ribosome biogenesis protein TSR3 homolog	TSR3	sp|Q9UJK0|TSR3_HUMAN Ribosome biogenesis protein TSR3 homolog OS=Homo sapiens OX=9606 GN=TSR3 PE=1 SV=1	1	86.4794	4.70386e-29	127.22	112.52	86.479	1	119.233	4.83504e-22	119.23	1	109.421	1.04414e-16	109.42	1	127.217	4.70386e-29	127.22	1	86.4794	5.05946e-11	86.479	1	76.768	4.08729e-09	76.768	1	102.577	1.59415e-13
Q8TBB5	Kelch domain-containing protein 4	KLHDC4	49	1.4483	1.1689	1.0087		1.3268		0.97233				Q8TBB5	49	Q8TBB5	Q8TBB5	Kelch domain-containing protein 4	KLHDC4	sp|Q8TBB5|KLDC4_HUMAN Kelch domain-containing protein 4 OS=Homo sapiens OX=9606 GN=KLHDC4 PE=1 SV=1	1	14.7696	5.04523e-30	134.07	134.07	14.77	1	87.2182	8.64864e-12	90.316					1	31.1112	5.04523e-30	134.07					1	47.5678	1.96417e-13	97.457
P13489	Ribonuclease inhibitor	RNH1	226	1.4474	7.0062	0.6078	1.0494	0.63707		1.2698				P13489	226	P13489	P13489	Ribonuclease inhibitor	RNH1	sp|P13489|RINI_HUMAN Ribonuclease inhibitor OS=Homo sapiens OX=9606 GN=RNH1 PE=1 SV=2	1	28.0893	0.000277211	97.734	60.622	28.089	1	31.8272	0.000277211	97.734	1	28.0893	0.062541	28.089	1	75.294	0.0063807	75.294					1	31.3894	0.00057528	73.781
Q9UBU8	Mortality factor 4-like protein 1	MORF4L1	249	1.4474	1.205	0.89811	1.0087	0.80834	1.0208	1.1192	1.2114	1.7445	1.5802	Q9UBU8	249	Q9UBU8	Q9UBU8	Mortality factor 4-like protein 1	MORF4L1	sp|Q9UBU8|MO4L1_HUMAN Mortality factor 4-like protein 1 OS=Homo sapiens OX=9606 GN=MORF4L1 PE=1 SV=2	1	133.589	2.0482e-43	163.56	159.31	163.56	1	133.589	2.0482e-43	163.56	1	105.886	3.014e-26	131.71	1	97.0664	7.26281e-14	105.89	1	67.9671	6.11758e-08	76.155	1	98.7574	8.10291e-14	104.78	1	130.402	4.56822e-35
P14866	Heterogeneous nuclear ribonucleoprotein L	HNRNPL	248	1.4469	1.0193	1.088		1.4888	1.4328					P14866	248	P14866	P14866	Heterogeneous nuclear ribonucleoprotein L	HNRNPL	sp|P14866|HNRPL_HUMAN Heterogeneous nuclear ribonucleoprotein L OS=Homo sapiens OX=9606 GN=HNRNPL PE=1 SV=2	1	110.235	2.7915e-14	111.77	111.77	111.77	1	102.509	7.2538e-14	105.9					1	110.235	2.7915e-14	111.77	1	106.432	4.23304e-14	109.87
P62263	40S ribosomal protein S14	RPS14	106	1.4462	1.5113	1.381	1.6308	1.6169	1.5286	0.71614	0.91026	0.68252		P62263	106	P62263	P62263	40S ribosomal protein S14	RPS14	sp|P62263|RS14_HUMAN 40S ribosomal protein S14 OS=Homo sapiens OX=9606 GN=RPS14 PE=1 SV=3	1	82.202	1.84151e-17	134.04	120.01	82.202	1	63.2832	1.61741e-09	109.95	1	51.9267	7.9117e-07	98.253	1	33.6851	1.84151e-17	134.04	1	82.202	3.43271e-05	82.202	1	51.9267	3.76275e-07	101.61	1	32.6059	1.00835e-09
Q14839	Chromodomain-helicase-DNA-binding protein 4	CHD4	1572	1.4462	1.293	1.2545	1.3747	1.2057	1.4435	1.2828	1.2052			Q14839	1572	Q14839	Q14839	Chromodomain-helicase-DNA-binding protein 4	CHD4	sp|Q14839|CHD4_HUMAN Chromodomain-helicase-DNA-binding protein 4 OS=Homo sapiens OX=9606 GN=CHD4 PE=1 SV=2	1	101.845	2.15787e-55	190.57	152.06	190.57	1	75.8047	1.15286e-22	136.01	1	75.8014	1.14761e-38	154.82	1	101.845	2.15787e-55	190.57	0.999993	51.4179	2.14833e-14	115.31	1	96.3058	1.83777e-47	175.65	1	76.9567	1.59924e-34
P23193	Transcription elongation factor A protein 1	TCEA1	265	1.4448		1.1336	1.0538	1.0068	1.3095	1.1582				P23193	265	P23193	P23193	Transcription elongation factor A protein 1	TCEA1	sp|P23193|TCEA1_HUMAN Transcription elongation factor A protein 1 OS=Homo sapiens OX=9606 GN=TCEA1 PE=1 SV=2	0.936407	11.6805	1.2494e-05	78.932	78.932	73.758	0.71112	3.91225	0.000973306	47.345	0.740758	4.55971	7.42589e-05	65.528	0.936407	11.6805	2.01726e-05	73.758	0.538844	0.676151	0.0489577	17.958	0.84164	7.25481	5.3668e-05	68.173
Q6NXG1	Epithelial splicing regulatory protein 1	ESRP1	217	1.4439	0.98626	0.81689	1.0082	0.84715	0.73167	0.83411	1.3684	1.0232	1.1238	Q6NXG1	217	Q6NXG1	Q6NXG1	Epithelial splicing regulatory protein 1	ESRP1	sp|Q6NXG1|ESRP1_HUMAN Epithelial splicing regulatory protein 1 OS=Homo sapiens OX=9606 GN=ESRP1 PE=1 SV=2	1	103.851	1.77299e-66	180.62	180.62	103.85	1	74.9528	5.2577e-09	74.953	1	116.605	6.64396e-22	116.6	1	180.622	1.77299e-66	180.62	1	103.851	6.0372e-14	103.85	1	140.955	4.07834e-38	140.95	1	87.49	4.37345e-11
P36894	Bone morphogenetic protein receptor type-1A	BMPR1A	531	1.4436								1.5104	1.4914	P36894	531	P36894	P36894	Bone morphogenetic protein receptor type-1A	BMPR1A	sp|P36894|BMR1A_HUMAN Bone morphogenetic protein receptor type-1A OS=Homo sapiens OX=9606 GN=BMPR1A PE=1 SV=2	1	57.1775	0.00285308	124.08	72.887	57.177
Q9BW19	Kinesin-like protein KIFC1	KIFC1	107	1.4431	1.0571							2.5107	2.4037	Q9BW19	107	Q9BW19	Q9BW19	Kinesin-like protein KIFC1	KIFC1	sp|Q9BW19|KIFC1_HUMAN Kinesin-like protein KIFC1 OS=Homo sapiens OX=9606 GN=KIFC1 PE=1 SV=2	0.999995	53.0113	0.00980046	60.691	44.437	60.691
Q12986	Transcriptional repressor NF-X1	NFX1	292	1.4427	1.2026		1.1601	1.0396		0.967	0.45097			Q12986	292	Q12986	Q12986	Transcriptional repressor NF-X1	NFX1	sp|Q12986|NFX1_HUMAN Transcriptional repressor NF-X1 OS=Homo sapiens OX=9606 GN=NFX1 PE=1 SV=2	1	97.5557	2.29085e-35	133.26	124.87	133.26					0.999999	62.7195	1.1824e-14	82.975	0.999833	37.7708	0.000147159	45.047					1	66.8394	3.87557e-18	95.957	0.966652	14.622	0.018557
Q14157	Ubiquitin-associated protein 2-like	UBAP2L	26	1.9543	1.5031	2.3194				0.73603				Q14157	26	Q14157	Q14157	Ubiquitin-associated protein 2-like	UBAP2L	sp|Q14157|UBP2L_HUMAN Ubiquitin-associated protein 2-like OS=Homo sapiens OX=9606 GN=UBAP2L PE=1 SV=2	1	37.2277	0.000218485	37.228	37.228	37.228	1	11.1046	0.0637985	11.105					1	30.0238	0.00044288	30.024					1	24.0955	0.00531484	24.096
P06493	Cyclin-dependent kinase 1	CDK1	139	1.4424	1.3505	1.3992	1.5058	0.94388	0.81098	0.76136	0.73357	1.802	1.853	P06493	139	P06493	P06493	Cyclin-dependent kinase 1	CDK1	sp|P06493|CDK1_HUMAN Cyclin-dependent kinase 1 OS=Homo sapiens OX=9606 GN=CDK1 PE=1 SV=3	0.999957	43.7086	2.75632e-54	185.26	185.26	185.26	0.999957	43.7086	2.75632e-54	185.26	0.999182	31.5631	2.59638e-33	139.49	0.999054	30.2452	1.10114e-47	178.12	0.908275	9.95846	1.13296e-25	136.34	0.998307	27.7336	1.30421e-33	143.67	0.926373	10.9985	3.66092e-13
Q9H0S4	Probable ATP-dependent RNA helicase DDX47	DDX47	231	1.4419	1.4263	0.8999		0.52818						Q9H0S4	231	Q9H0S4	Q9H0S4	Probable ATP-dependent RNA helicase DDX47	DDX47	sp|Q9H0S4|DDX47_HUMAN Probable ATP-dependent RNA helicase DDX47 OS=Homo sapiens OX=9606 GN=DDX47 PE=1 SV=1	0.999662	34.7106	0.00024406	84.17	67.23	71.558	0.999662	34.7106	0.00024406	84.17					0.926369	10.9972	0.0132786	49.3					0.977356	16.3511	0.020831	45.115
Q12986	Transcriptional repressor NF-X1	NFX1	94	1.4417	1.5079					0.98884		0.67403	0.65503	Q12986	94	Q12986	Q12986	Transcriptional repressor NF-X1	NFX1	sp|Q12986|NFX1_HUMAN Transcriptional repressor NF-X1 OS=Homo sapiens OX=9606 GN=NFX1 PE=1 SV=2	0.97318	15.5973	0.000181198	113.52	113.52	45.33																	0.5	0	0.0157058	26.148
P23193	Transcription elongation factor A protein 1	TCEA1	242	1.4416	1.1593		1.4448	1.2519			1.0285			P23193	242	P23193	P23193	Transcription elongation factor A protein 1	TCEA1	sp|P23193|TCEA1_HUMAN Transcription elongation factor A protein 1 OS=Homo sapiens OX=9606 GN=TCEA1 PE=1 SV=2	1	75.7382	0.00478841	109.86	53.852	75.738					1	71.5012	0.016558	71.501	1	71.5012	0.016558	71.501					1	83.2647	0.0137751	83.265	1	75.7382	0.0132154
P12004	Proliferating cell nuclear antigen	PCNA	77	1.4415	1.3243	1.6575						0.81239	0.81694	P12004	77	P12004	P12004	Proliferating cell nuclear antigen	PCNA	sp|P12004|PCNA_HUMAN Proliferating cell nuclear antigen OS=Homo sapiens OX=9606 GN=PCNA PE=1 SV=1	0.996017	23.9809	1.88118e-38	182.23	117.8	182.23	0.992298	21.1001	1.88118e-38	152.34
Q14573	Inositol 1,4,5-trisphosphate receptor type 3	ITPR3	2628	1.4409	1.0074	0.7816	1.1358	1.0441	1.1144	1.1793		1.0859	1.2152	Q14573	2628	Q14573	Q14573	Inositol 1,4,5-trisphosphate receptor type 3	ITPR3	sp|Q14573|ITPR3_HUMAN Inositol 1,4,5-trisphosphate receptor type 3 OS=Homo sapiens OX=9606 GN=ITPR3 PE=1 SV=2	0.999994	52.4112	2.8211e-05	130.41	83.215	87.184	0.999634	34.3655	0.000252433	80.245	0.887006	8.94873	0.030527	26.116	0.998018	27.02	0.00238964	75.378	0.990697	20.2733	0.0298769	26.274	0.978622	16.6064	0.00849029	38.238
Q86UE4	Protein LYRIC	MTDH	248	1.4407		1.4074				1.0915				Q86UE4	248	Q86UE4	Q86UE4	Protein LYRIC	MTDH	sp|Q86UE4|LYRIC_HUMAN Protein LYRIC OS=Homo sapiens OX=9606 GN=MTDH PE=1 SV=2	1	70.6878	1.42533e-05	77.746	70.338	77.746	1	70.6878	1.42533e-05	77.746													0.995944	23.9013	0.00803973	28.956
Q9H1I8	Activating signal cointegrator 1 complex subunit 2	ASCC2	20	1.4401										Q9H1I8	20	Q9H1I8	Q9H1I8	Activating signal cointegrator 1 complex subunit 2	ASCC2	sp|Q9H1I8|ASCC2_HUMAN Activating signal cointegrator 1 complex subunit 2 OS=Homo sapiens OX=9606 GN=ASCC2 PE=1 SV=3	0.855225	8.41202	1.25872e-05	57.499	34.846	56.959																	0.453159	0	0.000514046	57.499
Q12981	Vesicle transport protein SEC20	BNIP1	128	1.44	1.3149	1.2468	1.2757	1.1845		1.6583	1.0095	1.2432	0.98897	Q12981	128	Q12981	Q12981	Vesicle transport protein SEC20	BNIP1	sp|Q12981|SEC20_HUMAN Vesicle transport protein SEC20 OS=Homo sapiens OX=9606 GN=BNIP1 PE=1 SV=3	1	100.387	9.62007e-90	198.1	186.85	100.39	1	192.632	2.32111e-89	192.63	1	159.726	4.62238e-67	159.73	1	198.103	9.62007e-90	198.1					1	183.007	2.52447e-80	183.01	1	100.387	5.97374e-14
Q9Y2L1	Exosome complex exonuclease RRP44	DIS3	242	1.4386		0.93981		0.9696						Q9Y2L1	242	Q9Y2L1	Q9Y2L1	Exosome complex exonuclease RRP44	DIS3	sp|Q9Y2L1|RRP44_HUMAN Exosome complex exonuclease RRP44 OS=Homo sapiens OX=9606 GN=DIS3 PE=1 SV=2	1	110.775	7.68475e-13	110.77	110.77	110.77	1	78.2854	7.92046e-05	78.285					1	110.775	7.68475e-13	110.77					1	64.6747	0.000526848	64.675
Q9NUU6	Inactive ubiquitin thioesterase FAM105A	FAM105A	116	1.4383	1.2077	1.2445	1.2025	1.4508	1.1654	1.3333	1.4739	0.38346		Q9NUU6	116	Q9NUU6	Q9NUU6	Inactive ubiquitin thioesterase FAM105A	FAM105A	sp|Q9NUU6|F105A_HUMAN Inactive ubiquitin thioesterase FAM105A OS=Homo sapiens OX=9606 GN=FAM105A PE=2 SV=1	1	34.9526	3.42405e-05	129.38	111.25	34.953	1	71.223	0.000214047	103.7	1	116.305	4.78247e-05	116.3	1	111.607	0.000100273	111.61	1	34.9526	0.0351414	34.953	1	93.5508	3.42405e-05	129.38	1	58.6993	0.00585538
Q3B7T1	Erythroid differentiation-related factor 1	EDRF1	301	1.4381	1.738		1.1605	1.5063						Q3B7T1	301	Q3B7T1	Q3B7T1	Erythroid differentiation-related factor 1	EDRF1	sp|Q3B7T1|EDRF1_HUMAN Erythroid differentiation-related factor 1 OS=Homo sapiens OX=9606 GN=EDRF1 PE=1 SV=1	1	55.0613	0.000111406	55.061	55.061	55.061					1	55.0613	0.00134951	55.061	1	17.7486	0.0010102	30.585
O14757	Serine/threonine-protein kinase Chk1	CHEK1	54		1.4978						0.84504		0.73666	O14757	54	O14757	O14757	Serine/threonine-protein kinase Chk1	CHEK1	sp|O14757|CHK1_HUMAN Serine/threonine-protein kinase Chk1 OS=Homo sapiens OX=9606 GN=CHEK1 PE=1 SV=2	0.596939	1.70558	0.00100156	70.552	36.617	68.626																					0.5	0	0.00215015
Q05639	Elongation factor 1-alpha 2	EEF1A2	443	1.3296	1.4976	1.6748	1.149	1.3901		1.7646	1.597			Q05639	443	Q05639	Q05639	Elongation factor 1-alpha 2	EEF1A2	sp|Q05639|EF1A2_HUMAN Elongation factor 1-alpha 2 OS=Homo sapiens OX=9606 GN=EEF1A2 PE=1 SV=1	0.659243	2.866	5.7313e-05	90.05	47.86	90.05	0.659243	2.866	5.7313e-05	90.05	0.513953	0.242459	0.0533654	19.075	0.621822	2.15969	0.0021874	47.774					0.611119	1.96308	0.000848001	57.804	0.582681	1.44963	0.00508241
Q9H0H5	Rac GTPase-activating protein 1	RACGAP1	200	1.0767	1.4972			1.441		1.1723				Q9H0H5	200	Q9H0H5	Q9H0H5	Rac GTPase-activating protein 1	RACGAP1	sp|Q9H0H5|RGAP1_HUMAN Rac GTPase-activating protein 1 OS=Homo sapiens OX=9606 GN=RACGAP1 PE=1 SV=1	0.544379	0.772981	0.00751471	43.544	38.629	35.523									0.54217	0.734308	0.0129376	43.544	0.53997	0.695827	0.0473784	34.96	0.543042	0.749566	0.0315228	34.75
Q99618	Cell division cycle-associated protein 3	CDCA3	219	1.2583	1.4969									Q99618	219	Q99618	Q99618	Cell division cycle-associated protein 3	CDCA3	sp|Q99618|CDCA3_HUMAN Cell division cycle-associated protein 3 OS=Homo sapiens OX=9606 GN=CDCA3 PE=1 SV=1	0.998048	27.0873	0.00551108	28.956	18.675	28.956
Q00610	Clathrin heavy chain 1	CLTC	367	1.4379	1.3625	1.5006	1.6811	1.0411		1.6713				Q00610	367	Q00610	Q00610	Clathrin heavy chain 1	CLTC	sp|Q00610|CLH1_HUMAN Clathrin heavy chain 1 OS=Homo sapiens OX=9606 GN=CLTC PE=1 SV=5	1	79.8701	1.14049e-06	83.106	66.923	83.106	1	79.8701	6.77738e-06	83.106	0.999999	62.6959	1.66597e-05	64.565	1	71.5364	1.14049e-06	74.772					0.999998	56.2779	4.46672e-05	59.513
Q8IYW5	E3 ubiquitin-protein ligase RNF168	RNF168	485	1.437	1.2229	1.2481				0.64844				Q8IYW5	485	Q8IYW5	Q8IYW5	E3 ubiquitin-protein ligase RNF168	RNF168	sp|Q8IYW5|RN168_HUMAN E3 ubiquitin-protein ligase RNF168 OS=Homo sapiens OX=9606 GN=RNF168 PE=1 SV=1	1	43.8128	0.000341906	68.809	62.193	43.813	1	57.1357	0.000478275	57.136													1	58.3203	0.0026983	58.32	1	43.8128	0.0160439
O95235	Kinesin-like protein KIF20A	KIF20A	175	1.4367	1.8929	1.3477	1.4354	1.1224	1.1346	1.1341	0.98779	2.2213	2.5899	O95235	175	O95235	O95235	Kinesin-like protein KIF20A	KIF20A	sp|O95235|KI20A_HUMAN Kinesin-like protein KIF20A OS=Homo sapiens OX=9606 GN=KIF20A PE=1 SV=1	1	90.7538	4.10082e-25	133.71	133.71	90.754	1	109.352	1.00276e-12	109.35	1	133.714	4.10082e-25	133.71	1	112.338	5.11101e-13	112.34	1	90.7538	7.99207e-08	90.754	1	80.4881	6.05345e-07	80.488	1	89.5409	1.09709e-07
O60488	Long-chain-fatty-acid--CoA ligase 4	ACSL4	354	1.4367				1.6355	1.2421	1.0483		0.81387	1.1138	O60488	354	O60488	O60488	Long-chain-fatty-acid--CoA ligase 4	ACSL4	sp|O60488|ACSL4_HUMAN Long-chain-fatty-acid--CoA ligase 4 OS=Homo sapiens OX=9606 GN=ACSL4 PE=1 SV=2	0.983355	17.7144	2.09569e-42	164.01	154.96	164.01									0.808278	6.24889	8.89545e-05	53.362	0.857497	7.79409	1.19252e-09	99.451	0.689652	3.46782	6.13539e-07	76.051
Q15149	Plectin	PLEC	1165	1.4354	1.4481	1.1593	0.93857	1.1614	1.1493	1.7206	1.8256		1.2475	Q15149	1165	Q15149	Q15149	Plectin	PLEC	sp|Q15149|PLEC_HUMAN Plectin OS=Homo sapiens OX=9606 GN=PLEC PE=1 SV=3	1	128.534	1.00963e-73	207.39	207.39	159.08	1	128.534	2.91115e-47	172.91	1	125.761	1.00963e-73	207.39	1	117.957	1.54631e-63	199.58	1	72.8192	2.81591e-42	165.75	1	111.223	8.29031e-64	200.69	1	117.474	1.54631e-63
Q9UQ80	Proliferation-associated protein 2G4	PA2G4	376	1.4336	1.1539	1.0016	1.1011	1.3335		0.8843	1.3479			Q9UQ80	376	Q9UQ80	Q9UQ80	Proliferation-associated protein 2G4	PA2G4	sp|Q9UQ80|PA2G4_HUMAN Proliferation-associated protein 2G4 OS=Homo sapiens OX=9606 GN=PA2G4 PE=1 SV=3	1	96.5915	2.65493e-160	250.89	250.89	96.591	1	64.3937	2.24274e-26	123.43	1	29.7663	3.49025e-66	161.21	1	44.4565	0.000590455	44.457					1	250.895	2.65493e-160	250.89	1	96.5915	3.72358e-43
Q14258	E3 ubiquitin/ISG15 ligase TRIM25	TRIM25	349	1.4333	1.6098	1.4783	1.3062	1.454	1.4565	1.0669	1.01	1.2961	1.2315	Q14258	349	Q14258	Q14258	E3 ubiquitin/ISG15 ligase TRIM25	TRIM25	sp|Q14258|TRI25_HUMAN E3 ubiquitin/ISG15 ligase TRIM25 OS=Homo sapiens OX=9606 GN=TRIM25 PE=1 SV=2	1	61.6789	0.000168413	122.52	102	61.679	1	122.516	0.000224487	122.52	1	49.7151	0.0134168	49.715	1	38.3032	0.00254076	96.331	1	61.6789	0.00292055	61.679	1	86.6702	0.0101564	86.67	1	44.2031	0.0050532
O00244	Copper transport protein ATOX1	ATOX1	60	1.4323	1.5552	1.5013	1.5405	1.2294	1.5973	0.83523	0.47318	1.3911	1.2711	O00244	60	O00244	O00244	Copper transport protein ATOX1	ATOX1	sp|O00244|ATOX1_HUMAN Copper transport protein ATOX1 OS=Homo sapiens OX=9606 GN=ATOX1 PE=1 SV=1	1	177.063	8.95354e-29	190.96	174.5	177.06	1	147.947	6.3472e-21	174.98	1	140.164	4.09709e-27	182.16	1	147.947	8.95354e-29	190.96	1	177.063	3.88186e-21	177.06	1	159.404	3.88186e-21	177.06	1	125.48	1.98458e-09
P60903	Protein S100-A10	S100A10	57	1.4319	1.0342	1.1743	0.98015	1.1097	1.1709	1.0712	1.045	1.1909	1.0925	P60903	57	P60903	P60903	Protein S100-A10	S100A10	sp|P60903|S10AA_HUMAN Protein S100-A10 OS=Homo sapiens OX=9606 GN=S100A10 PE=1 SV=2	1	34.5322	0.000303305	107.47	97.877	34.532	1	47.1977	0.00200016	68.893	1	73.2332	0.00067424	88.681	1	34.5322	0.000942715	107.47	1	63.3973	0.00270131	63.397	1	67.5628	0.000522054	94.309	1	49.7151	0.000851579
Q5QJE6	Deoxynucleotidyltransferase terminal-interacting protein 2	DNTTIP2	24	1.4317				1.1547		0.62387				Q5QJE6	24	Q5QJE6	Q5QJE6	Deoxynucleotidyltransferase terminal-interacting protein 2	DNTTIP2	sp|Q5QJE6|TDIF2_HUMAN Deoxynucleotidyltransferase terminal-interacting protein 2 OS=Homo sapiens OX=9606 GN=DNTTIP2 PE=1 SV=2	1	69.1813	1.97708e-14	76.891	71.29	69.181									1	69.1813	1.7935e-12	69.181					1	76.8912	1.97708e-14	76.891
Q96PD2	Discoidin, CUB and LCCL domain-containing protein 2	DCBLD2	739	1.4309	1.5285	1.4872	1.3758	1.4339	1.4077	2.0618	2.025	1.1643	1.1434	Q96PD2	739	Q96PD2	Q96PD2	Discoidin, CUB and LCCL domain-containing protein 2	DCBLD2	sp|Q96PD2|DCBD2_HUMAN Discoidin, CUB and LCCL domain-containing protein 2 OS=Homo sapiens OX=9606 GN=DCBLD2 PE=1 SV=1	1	95.2549	3.72029e-22	104.51	96.799	95.255	1	90.907	4.43433e-15	90.907	1	65.7754	1.01297e-06	65.775	1	66.4468	4.89437e-07	66.447	1	95.2549	5.99051e-21	95.255	1	79.8748	2.26057e-10	79.875	1	104.511	3.72029e-22
Q96QK1	Vacuolar protein sorting-associated protein 35	VPS35	44	1.4309		0.65958		0.73378		2.0104				Q96QK1	44	Q96QK1	Q96QK1	Vacuolar protein sorting-associated protein 35	VPS35	sp|Q96QK1|VPS35_HUMAN Vacuolar protein sorting-associated protein 35 OS=Homo sapiens OX=9606 GN=VPS35 PE=1 SV=2	1	117.375	2.43326e-18	123.97	123.97	117.37	1	123.968	2.43326e-18	123.97					1	117.375	9.43736e-18	117.37					1	94.5445	4.5619e-09	94.544
E9PAV3	Nascent polypeptide-associated complex subunit alpha, muscle-specific form;Putative nascent polypeptide-associated complex subunit alpha-like protein	NACA;NACAP1	1971;107	1.43	0.93492	0.83977	0.90301	1.0282		0.76515	0.43801	1.6301	1.6235	E9PAV3;Q9BZK3	1971;107	E9PAV3	E9PAV3	Nascent polypeptide-associated complex subunit alpha, muscle-specific form;Putative nascent polypeptide-associated complex subunit alpha-like protein	NACA;NACAP1	sp|E9PAV3|NACAM_HUMAN Nascent polypeptide-associated complex subunit alpha, muscle-specific form OS=Homo sapiens OX=9606 GN=NACA PE=1 SV=1;sp|Q9BZK3|NACP4_HUMAN Putative nascent polypeptide-associated complex subunit alpha-like protein OS=Homo sapiens OX=9	0.999552	33.4876	1.02894e-14	160.77	128.16	116.71	0.948705	12.6706	1.121e-08	108.48	0.880123	8.65806	6.78022e-06	94.616	0.913306	10.2263	8.65816e-08	104.52					0.841611	7.25387	0.000145811	83.397	0.870652	8.28084	0.00716111
O95433	Activator of 90 kDa heat shock protein ATPase homolog 1	AHSA1	212		1.4923		1.0867	1.0609	0.74641	0.94283				O95433	212	O95433	O95433	Activator of 90 kDa heat shock protein ATPase homolog 1	AHSA1	sp|O95433|AHSA1_HUMAN Activator of 90 kDa heat shock protein ATPase homolog 1 OS=Homo sapiens OX=9606 GN=AHSA1 PE=1 SV=1	1	26.8897	0.0131929	33.313	33.313	26.89	1	25.0538	0.019411	25.054	1	33.3132	0.0396334	33.313	1	24.9041	0.019918	24.904	1	26.8897	0.0131929	26.89	1	18.8231	0.0405146	18.823
Q6P2Q9	Pre-mRNA-processing-splicing factor 8	PRPF8	1955		1.492		1.412							Q6P2Q9	1955	Q6P2Q9	Q6P2Q9	Pre-mRNA-processing-splicing factor 8	PRPF8	sp|Q6P2Q9|PRP8_HUMAN Pre-mRNA-processing-splicing factor 8 OS=Homo sapiens OX=9606 GN=PRPF8 PE=1 SV=2	0.5	0	1.83917e-13	77.19	71.029	77.19					0.5	0	1.83917e-13	77.19
P28290	Sperm-specific antigen 2	SSFA2	947	1.4297	1.1508	0.78382	0.92986			0.81554			0.87526	P28290	947	P28290	P28290	Sperm-specific antigen 2	SSFA2	sp|P28290|ITPI2_HUMAN Protein ITPRID2 OS=Homo sapiens OX=9606 GN=ITPRID2 PE=1 SV=3	1	83.0877	6.75246e-24	106.43	106.43	83.088	1	68.5156	1.35235e-11	68.516	1	83.0877	5.11399e-22	83.088									1	68.5156	1.35235e-11	68.516
P12270	Nucleoprotein TPR	TPR	1128	1.4297	0.71502	0.99121	0.83528	0.75315						P12270	1128	P12270	P12270	Nucleoprotein TPR	TPR	sp|P12270|TPR_HUMAN Nucleoprotein TPR OS=Homo sapiens OX=9606 GN=TPR PE=1 SV=3	1	79.0217	1.23602e-05	79.022	69.101	79.022	1	21.2096	0.0367144	21.21	1	79.0217	1.23602e-05	79.022	1	79.0217	0.000888859	79.022
[truncated: 22,176 more rows]
[truncated: 311 more columns]
